# Supplementary material for: Recurrent horizontal gene acquisition in the evolutionary history of ants
Source: Research Square preprint supplement (doi:10.21203/rs.3.rs-5741203/v1), 2025-01-13
Supplement: Supplementary file 1 [file 04b0658f219df0b6e5254dc8.xlsx]

## Sheet: Tabelle1
Synteny comment	locusID	.id	locus.scaffold	locus.position	cand.locus	cand.start	cand.end	cand.length	reads_start	reads_end	reads_complete	species	subfamily	order_prokaryote_origin	class_prokaryote_origin	CDS.starts	Reannotated.CDS.starts	CDS.ends	Reannotated.CDS.ends	CDS.lengths	Reannotated.CDS.lengths	CDS.totalcounts	Reannotated.CDS.totalcounts	CDS.UniprotIDs	Protein.names	CDS.pids	CDS.q_covs	CDS.s_covs	CDS.Eval	CDS.startCodons	CDS.stopCodons	Organism	Gene.ontology.IDs	Gene.ontology..GO.	Gene.ontology..biological.process.	Gene.ontology..molecular.function.	Gene.ontology..cellular.component.	Uniprot_organism	Uniprot_tax_order	Uniprot_tax_class
syntenic	GAGA-0513.Scaffold72.70155-70339	GAGA-0513	Scaffold72	70155-70339	Scaffold72:70155-70339	70155	70339	184	29	28	25	Temnothorax ambiguus	Myrmicinae	Sphingobacteriales	Sphingobacteriia	70197	70197	70339	70352	142	155	3	3	A0A345PN33	Putative AAA-ATPase	71.7	100.0	8.4	2.9e-09	GGA	TAA	Cardinium endosymbiont of Sogatella furcifera						Amoebophilaceae	Bacteroidetes	Bacteroidetes/Chlorobi group
syntenic	GAGA-0223.Scaffold10.2118171-2118355	GAGA-0223	Scaffold10	2118171-2118355	Scaffold10:2118171-2118355	2118171	2118355	184	29	28	27	Temnothorax longispinosus	Myrmicinae	Sphingobacteriales	Sphingobacteriia	2118171	2118157	2118355	2118372	184	215	11	14	A0A345PN33	Putative AAA-ATPase	70.2	93.4	10.5	6.7e-14	GAA	CTT	Cardinium endosymbiont of Sogatella furcifera						Amoebophilaceae	Bacteroidetes	Bacteroidetes/Chlorobi group
syntenic	GAGA-0513.Scaffold64.948871-949052	GAGA-0513	Scaffold64	948871-949052	Scaffold64:948871-949052	948871	949052	181	41	38	33	Temnothorax ambiguus	Myrmicinae	Sphingobacteriales	Sphingobacteriia	948873	948873	949001	949001	128	128	0	0	A0A345PN33	Putative AAA-ATPase	73.8	100.0	7.7	7.1e-08	ATG	TAA	Cardinium endosymbiont of Sogatella furcifera						Amoebophilaceae	Bacteroidetes	Bacteroidetes/Chlorobi group
syntenic	GAGA-0513.Scaffold64.948871-949052	GAGA-0513	Scaffold64	948871-949052	Scaffold64:948871-949052	948871	949052	181	41	38	33	Temnothorax ambiguus	Myrmicinae	Sphingobacteriales	Sphingobacteriia	948873	949052	949001	949174	128	122	0	0	A0A345PN33	Putative AAA-ATPase	73.8	100.0	7.7	7.1e-08	ATG	TAA	Cardinium endosymbiont of Sogatella furcifera						Amoebophilaceae	Bacteroidetes	Bacteroidetes/Chlorobi group
syntenic	GAGA-0223.Scaffold39.1542631-1542813	GAGA-0223	Scaffold39	1542631-1542813	Scaffold39:1542631-1542813	1542631	1542813	182	47	52	39	Temnothorax longispinosus	Myrmicinae	Sphingobacteriales	Sphingobacteriia	1542631	1542813	1542756	1542935	125	122	6	4	A0A345PN33	Putative AAA-ATPase	77.5	97.6	7.3	1.6e-07	AAA	TAA	Cardinium endosymbiont of Sogatella furcifera						Amoebophilaceae	Bacteroidetes	Bacteroidetes/Chlorobi group
syntenic	GAGA-0223.Scaffold39.1542631-1542813	GAGA-0223	Scaffold39	1542631-1542813	Scaffold39:1542631-1542813	1542631	1542813	182	47	52	39	Temnothorax longispinosus	Myrmicinae	Sphingobacteriales	Sphingobacteriia	1542631	1542634	1542756	1542756	125	122	6	6	A0A345PN33	Putative AAA-ATPase	77.5	97.6	7.3	1.6e-07	AAA	TAA	Cardinium endosymbiont of Sogatella furcifera						Amoebophilaceae	Bacteroidetes	Bacteroidetes/Chlorobi group
highly syntenic	GAGA-0463.Scaffold25.3133505-3134642	GAGA-0463	Scaffold25	3133505-3134642	Scaffold25:3133505-3134642	3133505	3134642	1137	33	33	28	Formicoxenus nitidulus	Myrmicinae	Enterobacterales	Gammaproteobacteria	3133505	3133690	3134642	3134643	1137	953	4514	4302	W0HVG4	D-alanine--D-alanine ligase (EC 6.3.2.4) (D-Ala-D-Ala ligase) (D-alanylalanine synthetase)	76.9	97.4	99.2		TTT	CTA	Sodalis praecaptivus	GO:0005524; GO:0005737; GO:0008360; GO:0008716; GO:0009252; GO:0046872; GO:0071555	cytoplasm [GO:0005737]; ATP binding [GO:0005524]; D-alanine-D-alanine ligase activity [GO:0008716]; metal ion binding [GO:0046872]; cell wall organization [GO:0071555]; peptidoglycan biosynthetic process [GO:0009252]; regulation of cell shape [GO:0008360]	cell wall organization [GO:0071555]; peptidoglycan biosynthetic process [GO:0009252]; regulation of cell shape [GO:0008360]	ATP binding [GO:0005524]; D-alanine-D-alanine ligase activity [GO:0008716]; metal ion binding [GO:0046872]	cytoplasm [GO:0005737]	cellular organisms, Bacteria, Proteobacteria, Gammaproteobacteria, Enterobacterales, Bruguierivoracaceae, Sodalis (tsetse S-endosymbionts), Sodalis praecaptivus	Enterobacterales	Gammaproteobacteria
highly syntenic	GAGA-0098.Scaffold8.1328058-1329239	GAGA-0098	Scaffold8	1328058-1329239	Scaffold8:1328058-1329239	1328058	1329239	1181	27	28	21	Harpagoxenus sublaevis	Myrmicinae	Enterobacterales	Gammaproteobacteria	1328122	1328200	1329239	1329240	1117	1040	132	128	W0HVG4	D-alanine--D-alanine ligase (EC 6.3.2.4) (D-Ala-D-Ala ligase) (D-alanylalanine synthetase)	76.1	98.9	99.2		ATG	CTA	Sodalis praecaptivus	GO:0005524; GO:0005737; GO:0008360; GO:0008716; GO:0009252; GO:0046872; GO:0071555	cytoplasm [GO:0005737]; ATP binding [GO:0005524]; D-alanine-D-alanine ligase activity [GO:0008716]; metal ion binding [GO:0046872]; cell wall organization [GO:0071555]; peptidoglycan biosynthetic process [GO:0009252]; regulation of cell shape [GO:0008360]	cell wall organization [GO:0071555]; peptidoglycan biosynthetic process [GO:0009252]; regulation of cell shape [GO:0008360]	ATP binding [GO:0005524]; D-alanine-D-alanine ligase activity [GO:0008716]; metal ion binding [GO:0046872]	cytoplasm [GO:0005737]	cellular organisms, Bacteria, Proteobacteria, Gammaproteobacteria, Enterobacterales, Bruguierivoracaceae, Sodalis (tsetse S-endosymbionts), Sodalis praecaptivus	Enterobacterales	Gammaproteobacteria
highly syntenic	OUT-0002.Scaffold21.1673684-1673934	OUT-0002	Scaffold21	1673684-1673934	Scaffold21:1673684-1673934	1673684	1673934	250	64	64	63	Formica cinerea	Formicinae	Entoplasmatales	Mollicutes	1673684	1673648	1673902	1673902	218	254	0	0	W0GSI6	Ribosomal RNA small subunit methyltransferase A (EC 2.1.1.182) (16S rRNA (adenine(1518)-N(6)/adenine(1519)-N(6))-dimethyltransferase) (16S rRNA dimethyladenosine transferase) (16S rRNA dimethylase) (S-adenosylmethionine-6-N', N'-adenosyl(rRNA) dimethyltransferase)	72.5	94.5	24.6	8.7e-22	GTG	GAA	Spiroplasma mirum ATCC 29335	GO:0003723; GO:0005737; GO:0052908	cytoplasm [GO:0005737]; 16S rRNA (adenine(1518)-N(6)/adenine(1519)-N(6))-dimethyltransferase activity [GO:0052908]; RNA binding [GO:0003723]		16S rRNA (adenine(1518)-N(6)/adenine(1519)-N(6))-dimethyltransferase activity [GO:0052908]; RNA binding [GO:0003723]	cytoplasm [GO:0005737]	Spiroplasma	Mollicutes	Tenericutes
highly syntenic	GAGA-0502.Scaffold15.2279751-2280007	GAGA-0502	Scaffold15	2279751-2280007	Scaffold15:2279751-2280007	2279751	2280007	256	85	85	85	Iberoformica subrufa	Formicinae	Entoplasmatales	Mollicutes	2279782	2279782	2280007	2280042	225	260	0	0	W0GSI6	Ribosomal RNA small subunit methyltransferase A (EC 2.1.1.182) (16S rRNA (adenine(1518)-N(6)/adenine(1519)-N(6))-dimethyltransferase) (16S rRNA dimethyladenosine transferase) (16S rRNA dimethylase) (S-adenosylmethionine-6-N', N'-adenosyl(rRNA) dimethyltransferase)	70.4	94.7	24.6	1.6e-20	GTG	AAA	Spiroplasma mirum ATCC 29335	GO:0003723; GO:0005737; GO:0052908	cytoplasm [GO:0005737]; 16S rRNA (adenine(1518)-N(6)/adenine(1519)-N(6))-dimethyltransferase activity [GO:0052908]; RNA binding [GO:0003723]		16S rRNA (adenine(1518)-N(6)/adenine(1519)-N(6))-dimethyltransferase activity [GO:0052908]; RNA binding [GO:0003723]	cytoplasm [GO:0005737]	Spiroplasma	Mollicutes	Tenericutes
highly syntenic	OUT-0001.CM020829.1.3349325-3349575	OUT-0001	CM020829_1	3349325-3349575	CM020829.1:3349325-3349575	3349325	3349575	250	65	64	62	Formica selysi	Formicinae	Entoplasmatales	Mollicutes	3349325	3349289	3349543	3349543	218	254	0	0	W0GSI6	Ribosomal RNA small subunit methyltransferase A (EC 2.1.1.182) (16S rRNA (adenine(1518)-N(6)/adenine(1519)-N(6))-dimethyltransferase) (16S rRNA dimethyladenosine transferase) (16S rRNA dimethylase) (S-adenosylmethionine-6-N', N'-adenosyl(rRNA) dimethyltransferase)	73.9	94.5	24.6	3.0e-22	GTG	GAA	Spiroplasma mirum ATCC 29335	GO:0003723; GO:0005737; GO:0052908	cytoplasm [GO:0005737]; 16S rRNA (adenine(1518)-N(6)/adenine(1519)-N(6))-dimethyltransferase activity [GO:0052908]; RNA binding [GO:0003723]		16S rRNA (adenine(1518)-N(6)/adenine(1519)-N(6))-dimethyltransferase activity [GO:0052908]; RNA binding [GO:0003723]	cytoplasm [GO:0005737]	Spiroplasma	Mollicutes	Tenericutes
highly syntenic	GAGA-0350.Scaffold14.2303732-2303983	GAGA-0350	Scaffold14	2303732-2303983	Scaffold14:2303732-2303983	2303732	2303983	251	40	40	40	Formica fusca	Formicinae	Entoplasmatales	Mollicutes	2303732	2303696	2303932	2303932	200	236	0	0	W0GSI6	Ribosomal RNA small subunit methyltransferase A (EC 2.1.1.182) (16S rRNA (adenine(1518)-N(6)/adenine(1519)-N(6))-dimethyltransferase) (16S rRNA dimethyladenosine transferase) (16S rRNA dimethylase) (S-adenosylmethionine-6-N', N'-adenosyl(rRNA) dimethyltransferase)	65.1	94.0	21	3.2e-13	TTG	GAA	Spiroplasma mirum ATCC 29335	GO:0003723; GO:0005737; GO:0052908	cytoplasm [GO:0005737]; 16S rRNA (adenine(1518)-N(6)/adenine(1519)-N(6))-dimethyltransferase activity [GO:0052908]; RNA binding [GO:0003723]		16S rRNA (adenine(1518)-N(6)/adenine(1519)-N(6))-dimethyltransferase activity [GO:0052908]; RNA binding [GO:0003723]	cytoplasm [GO:0005737]	Spiroplasma	Mollicutes	Tenericutes
highly syntenic	GAGA-0485.Scaffold19.2863851-2864103	GAGA-0485	Scaffold19	2863851-2864103	Scaffold19:2863851-2864103	2863851	2864103	252	43	43	43	Formica sanguinea	Formicinae	Entoplasmatales	Mollicutes	2863851	2863866	2864103	2864138	252	272	0	0	W0GSI6	Ribosomal RNA small subunit methyltransferase A (EC 2.1.1.182) (16S rRNA (adenine(1518)-N(6)/adenine(1519)-N(6))-dimethyltransferase) (16S rRNA dimethyladenosine transferase) (16S rRNA dimethylase) (S-adenosylmethionine-6-N', N'-adenosyl(rRNA) dimethyltransferase)	78.3	98.8	29.5	1.9e-29	TCA	AAA	Spiroplasma mirum ATCC 29335	GO:0003723; GO:0005737; GO:0052908	cytoplasm [GO:0005737]; 16S rRNA (adenine(1518)-N(6)/adenine(1519)-N(6))-dimethyltransferase activity [GO:0052908]; RNA binding [GO:0003723]		16S rRNA (adenine(1518)-N(6)/adenine(1519)-N(6))-dimethyltransferase activity [GO:0052908]; RNA binding [GO:0003723]	cytoplasm [GO:0005737]	Spiroplasma	Mollicutes	Tenericutes
highly syntenic	GAGA-0359.Scaffold12.3361534-3361785	GAGA-0359	Scaffold12	3361534-3361785	Scaffold12:3361534-3361785	3361534	3361785	251	57	59	56	Formica japonica	Formicinae	Entoplasmatales	Mollicutes	3361584	3361584	3361785	3361820	201	236	10	10	W0GSI6	Ribosomal RNA small subunit methyltransferase A (EC 2.1.1.182) (16S rRNA (adenine(1518)-N(6)/adenine(1519)-N(6))-dimethyltransferase) (16S rRNA dimethyladenosine transferase) (16S rRNA dimethylase) (S-adenosylmethionine-6-N', N'-adenosyl(rRNA) dimethyltransferase)	65.1	94.0	21	3.2e-13	TTG	AAA	Spiroplasma mirum ATCC 29335	GO:0003723; GO:0005737; GO:0052908	cytoplasm [GO:0005737]; 16S rRNA (adenine(1518)-N(6)/adenine(1519)-N(6))-dimethyltransferase activity [GO:0052908]; RNA binding [GO:0003723]		16S rRNA (adenine(1518)-N(6)/adenine(1519)-N(6))-dimethyltransferase activity [GO:0052908]; RNA binding [GO:0003723]	cytoplasm [GO:0005737]	Spiroplasma	Mollicutes	Tenericutes
only HGA is homologous	GAGA-0099.Scaffold4.5620327-5620504	GAGA-0099	Scaffold4	5620327-5620504	Scaffold4:5620327-5620504	5620327	5620504	177	35	37	33	Leptothorax acervorum	Myrmicinae	Sphingobacteriales	Sphingobacteriia	5620327	5620285	5620504	5620542	177	257	0	0	A0A556QVC9	AAA-ATPase_like domain-containing protein	88.1	100.0	20.2	3.9e-22	TTA	AGT	Cardinium endosymbiont of Dermatophagoides farinae						Amoebophilaceae	Bacteroidetes	Bacteroidetes/Chlorobi group
only HGA is homologous	GAGA-0099.Scaffold4.5794430-5794610	GAGA-0099	Scaffold4	5794430-5794610	Scaffold4:5794430-5794610	5794430	5794610	180	35	34	34	Leptothorax acervorum	Myrmicinae	Sphingobacteriales	Sphingobacteriia	5794430								A0A556QVC9	AAA-ATPase_like domain-containing protein	86.7	100.0	20.5	2.3e-22	TTA	ATA	Cardinium endosymbiont of Dermatophagoides farinae						Amoebophilaceae	Bacteroidetes	Bacteroidetes/Chlorobi group
only HGA is homologous	GAGA-0463.Scaffold87.542630-542813	GAGA-0463	Scaffold87	542630-542813	Scaffold87:542630-542813	542630	542813	183	40	40	40	Formicoxenus nitidulus	Myrmicinae	Sphingobacteriales	Sphingobacteriia	542630	542591	542813	542935	183	344	1	2	A0A556QWV4	AAA-ATPase_like domain-containing protein	85.0	98.4	10.8	4.3e-21	TAG	ATA	Cardinium endosymbiont of Dermatophagoides farinae						Amoebophilaceae	Bacteroidetes	Bacteroidetes/Chlorobi group
no synteny detected	GAGA-0543.Scaffold14.1894874-1897946	GAGA-0543	Scaffold14	1894874-1897946	Scaffold14:1894874-1897946	1894874	1897946	3072	64	58	55	Kalathomyrmex emeryi	Myrmicinae	Rickettsiales	Alphaproteobacteria	1895964	1895964	1897946	1897877	1982	1913	5712	5701	B3CMH9	DNA helicase (EC 3.6.4.12)	84.7	95.6	99.5		ACA	TAG	Wolbachia pipientis subsp. Culex pipiens (strain wPip)	GO:0003677; GO:0003678; GO:0005524; GO:0006260; GO:0140603	ATP binding [GO:0005524]; ATP hydrolysis activity [GO:0140603]; DNA binding [GO:0003677]; DNA helicase activity [GO:0003678]; DNA replication [GO:0006260]	DNA replication [GO:0006260]	ATP binding [GO:0005524]; ATP hydrolysis activity [GO:0140603]; DNA binding [GO:0003677]; DNA helicase activity [GO:0003678]		Wolbachia	Rickettsiales	Alphaproteobacteria
no synteny detected	GAGA-0307.Scaffold17.5138154-5140217	GAGA-0307	Scaffold17	5138154-5140217	Scaffold17:5138154-5140217	5138154	5140217	2063	48	46	42	Hypoponera opacior	Ponerinae	Rickettsiales	Alphaproteobacteria	5138219	5138219	5140147	5140147	1928	1928	2416	2416	B3CMH9	DNA helicase (EC 3.6.4.12)	67.8	99.5	99.1		ATG	TAA	Wolbachia pipientis subsp. Culex pipiens (strain wPip)	GO:0003677; GO:0003678; GO:0005524; GO:0006260; GO:0140603	ATP binding [GO:0005524]; ATP hydrolysis activity [GO:0140603]; DNA binding [GO:0003677]; DNA helicase activity [GO:0003678]; DNA replication [GO:0006260]	DNA replication [GO:0006260]	ATP binding [GO:0005524]; ATP hydrolysis activity [GO:0140603]; DNA binding [GO:0003677]; DNA helicase activity [GO:0003678]		Wolbachia	Rickettsiales	Alphaproteobacteria
no synteny detected	GAGA-0028.Scaffold61.846268-850012	GAGA-0028	Scaffold61	846268-850012	Scaffold61:846268-850012	846268	850012	3744	24	21	20	Myrmica rubra	Myrmicinae	Rickettsiales	Alphaproteobacteria	848330	848330	848836	848836	506	506	0	0	A0A6M5E574	DNA repair protein RadC	96.8	92.9	70.3	1.9e-77	ATG	TAA	Wolbachia endosymbiont of Diaphorina citri	GO:0008237; GO:0046872	metal ion binding [GO:0046872]; metallopeptidase activity [GO:0008237]	NA	metal ion binding [GO:0046872]; metallopeptidase activity [GO:0008237]		Wolbachia	Rickettsiales	Alphaproteobacteria
no synteny detected	GAGA-0028.Scaffold61.852812-855906	GAGA-0028	Scaffold61	852812-855906	Scaffold61:852812-855906	852812	855906	3094	23	16	12	Myrmica rubra	Myrmicinae	Rickettsiales	Alphaproteobacteria	853336	853336	853539	853539	203	203	0	0	A0A6M5E574	DNA repair protein RadC	94.5	82.1	24.8	2.3e-19	ATG	TAA	Wolbachia endosymbiont of Diaphorina citri	GO:0008237; GO:0046872	metal ion binding [GO:0046872]; metallopeptidase activity [GO:0008237]	NA	metal ion binding [GO:0046872]; metallopeptidase activity [GO:0008237]		Wolbachia	Rickettsiales	Alphaproteobacteria
no synteny detected	GAGA-0401.Scaffold317.47703-50709	GAGA-0401	Scaffold317	47703-50709	Scaffold317:47703-50709	47703	50709	3006	41	16	15	Myrmica angulata	Myrmicinae	Rickettsiales	Alphaproteobacteria	49739	49739	50248	50248	509	509	60	60	A0A6M5E574	DNA repair protein RadC	96.2	92.9	70.3	4.6e-76	ATG	TAA	Wolbachia endosymbiont of Diaphorina citri	GO:0008237; GO:0046872	metal ion binding [GO:0046872]; metallopeptidase activity [GO:0008237]	NA	metal ion binding [GO:0046872]; metallopeptidase activity [GO:0008237]		Wolbachia	Rickettsiales	Alphaproteobacteria
no synteny detected	GAGA-0028.Scaffold217.297424-303832	GAGA-0028	Scaffold217	297424-303832	Scaffold217:297424-303832	297424	303832	6408	25	38	19	Myrmica rubra	Myrmicinae	Rickettsiales	Alphaproteobacteria	299543	299543	300010	300010	467	467	2	2	A0A6M5E574	DNA repair protein RadC	97.4	98.1	68.5	8.0e-76	ATG	TAG	Wolbachia endosymbiont of Diaphorina citri	GO:0008237; GO:0046872	metal ion binding [GO:0046872]; metallopeptidase activity [GO:0008237]	NA	metal ion binding [GO:0046872]; metallopeptidase activity [GO:0008237]		Wolbachia	Rickettsiales	Alphaproteobacteria
no synteny detected	GAGA-0401.Scaffold317.40057-44029	GAGA-0401	Scaffold317	40057-44029	Scaffold317:40057-44029	40057	44029	3972	52	38	38	Myrmica angulata	Myrmicinae	Rickettsiales	Alphaproteobacteria	43151	43151	43573	43573	422	422	102	102	A0A6M5E574	DNA repair protein RadC	97.7	91.4	57.7	1.7e-62	GTG	TAA	Wolbachia endosymbiont of Diaphorina citri	GO:0008237; GO:0046872	metal ion binding [GO:0046872]; metallopeptidase activity [GO:0008237]	NA	metal ion binding [GO:0046872]; metallopeptidase activity [GO:0008237]		Wolbachia	Rickettsiales	Alphaproteobacteria
no synteny detected	GAGA-0028.Scaffold61.852812-855906	GAGA-0028	Scaffold61	852812-855906	Scaffold61:852812-855906	852812	855906	3094	23	16	12	Myrmica rubra	Myrmicinae	Rickettsiales	Alphaproteobacteria	853566	853566	853838	853838	272	272	0	0	A0A6M5E574	DNA repair protein RadC	95.3	94.4	38.3	3.3e-37	ATG	TAA	Wolbachia endosymbiont of Diaphorina citri	GO:0008237; GO:0046872	metal ion binding [GO:0046872]; metallopeptidase activity [GO:0008237]	NA	metal ion binding [GO:0046872]; metallopeptidase activity [GO:0008237]		Wolbachia	Rickettsiales	Alphaproteobacteria
no synteny detected	GAGA-0028.Scaffold217.297424-303832	GAGA-0028	Scaffold217	297424-303832	Scaffold217:297424-303832	297424	303832	6408	25	38	19	Myrmica rubra	Myrmicinae	Rickettsiales	Alphaproteobacteria	301250	301250	301756	301756	506	506	1	1	A0A6M5E574	DNA repair protein RadC	97.4	92.9	70.3	6.5e-78	ATG	TAA	Wolbachia endosymbiont of Diaphorina citri	GO:0008237; GO:0046872	metal ion binding [GO:0046872]; metallopeptidase activity [GO:0008237]	NA	metal ion binding [GO:0046872]; metallopeptidase activity [GO:0008237]		Wolbachia	Rickettsiales	Alphaproteobacteria
no synteny detected	GAGA-0520.Scaffold16.3576008-3576157	GAGA-0520	Scaffold16	3576008-3576157	Scaffold16:3576008-3576157	3576008	3576157	149	57	57	57	Melissotarsus emeryi	Myrmicinae	Rickettsiales	Alphaproteobacteria	3576008	3576117	3576156	3576272	NA	NA	NA		A0A059IVU6	Peptidase A2 domain-containing protein	93.8	100.0	28.1	8.5e-17	TAT	TAA	Wolbachia endosymbiont of Glossina morsitans morsitans	GO:0004190	aspartic-type endopeptidase activity [GO:0004190]	NA	aspartic-type endopeptidase activity [GO:0004190]		Wolbachia	Rickettsiales	Alphaproteobacteria
no synteny detected	GAGA-0229.Scaffold57.170082-179129	GAGA-0229	Scaffold57	170082-179129	Scaffold57:170082-179129	170082	179129	9047	14	10	0	Cephalotes minutus	Myrmicinae	Rickettsiales	Alphaproteobacteria	170092	174491	170376	174925	284	434	2	3	A0A059IVU6	Peptidase A2 domain-containing protein	88.4	100.0	55.6	1.8e-40	TTG	TAG	Wolbachia endosymbiont of Glossina morsitans morsitans	GO:0004190	aspartic-type endopeptidase activity [GO:0004190]	NA	aspartic-type endopeptidase activity [GO:0004190]		Wolbachia	Rickettsiales	Alphaproteobacteria
only HGA is homologous	GAGA-0222.Scaffold97.590539-593737	GAGA-0222	Scaffold97	590539-593737	Scaffold97:590539-593737	590539	593737	3198	36	37	33	Temnothorax rugatulus	Myrmicinae	Rickettsiales	Alphaproteobacteria	590539	590475	590726	590726	187	251	0	0	A0A3B0J9W7	Disulfide bond formation protein D	84.9	86.9	21.5	4.9e-17	TAA	TAG	Wolbachia endosymbiont of Aleurodicus floccissimus						Wolbachia	Rickettsiales	Alphaproteobacteria
only HGA is homologous	GAGA-0510.Scaffold127.473304-477948	GAGA-0510	Scaffold127	473304-477948	Scaffold127:473304-477948	473304	477948	4644	61	61	42	Temnothorax nylanderi	Myrmicinae	Rickettsiales	Alphaproteobacteria	473304	473224	473511	473511	207	287	2	2	A0A3B0J9W7	Disulfide bond formation protein D	89.2	95.6	26.4	3.2e-24	TTT	TAG	Wolbachia endosymbiont of Aleurodicus floccissimus						Wolbachia	Rickettsiales	Alphaproteobacteria
																									x
