# Supplementary material for: Recurrent horizontal gene acquisition in the evolutionary history of ants
Source: Research Square preprint supplement (doi:10.21203/rs.3.rs-5741203/v1), 2025-01-13
Supplement: Supplementary file 2 [file 116d5136f0c8e2397a558d0e.xlsx]

## Sheet: A.Locus_level_HGAs
locusID	.id	species	subfamily	Protein.names	prokaryote_origin	order_prokaryote_origin	class_prokaryote_origin	locus.scaffold	locus.position	cand.locus	cand.start	cand.end	cand.length	reads_start	reads_end	reads_complete	CDS	CDS.starts	Reannotated.CDS.starts	CDS.ends	Reannotated.CDS.ends	CDS.lengths	Reannotated.CDS.lengths	CDS.totalcounts	Reannotated.CDS.totalcounts	CDS.UniprotIDs	CDS.q_covs	Reannotated.q_covs	CDS.s_covs	Reannotated.s_covs	CDS.Eval	Reannotated.Eval	CDS.startCodons	Reannotated.startCodons	CDS.stopCodons	Reannotated.stopCodons
GAGA-0020.Scaffold1.5322877-5323044	GAGA-0020	Lasius flavus s2	Formicinae	hypothetical protein	Wolbachia	Rickettsiales	Alphaproteobacteria	Scaffold1	5322877-5323044	Scaffold1:5322877-5323044	5322877	5323044	167	64	64	64	1	5322914	5322914	5323044	5323093	130	179	8	8	NA	NA	NA	NA	NA	NA	NA	ATA	ATG	TAA	TAA
GAGA-0020.Scaffold107.144838-147367	GAGA-0020	Lasius flavus s2	Formicinae	Uncharacterized protein (Fragment)	Wolbachia	Rickettsiales	Alphaproteobacteria	Scaffold107	144838-147367	Scaffold107:144838-147367	144838	147367	2529	73	75	67	1	144838	144482	147367	147634	2529	3152	7505	12826	A0A1Q3WAM0	99.9	86	64.599999999999994	69.400000000000006	2.6000000000000001E-153	4.7999999999999998E-160	CTT	ATG	CTA	TAG
GAGA-0020.Scaffold17.156258-159230	GAGA-0020	Lasius flavus s2	Formicinae	Ankyrin repeat protein;Ankyrin repeat protein	Wolbachia	Rickettsiales	Alphaproteobacteria	Scaffold17	156258-159230	Scaffold17:156258-159230	156258	159230	2972	69	59	56	2	156302;159020	156302;159020	158971;159230	158971;159232	2669;210	2669;212	1636;140	1636;140	E9P653;E9P653	100.0;100.0	100.0;100.0	89.2;7.7	89.2;7.7	NA;1.5e-18	NA;1.5e-18	ATG;ATG	ATG;ATG	TAA;TGT	TAA;TAA
GAGA-0020.Scaffold267.55721-56766	GAGA-0020	Lasius flavus s2	Formicinae	Ankyrin 3 (Ankyrin repeat family protein)	Wolbachia	Rickettsiales	Alphaproteobacteria	Scaffold267	55721-56766	Scaffold267:55721-56766	55721	56766	1045	42	44	41	1	55765	55765	56445	56445	680	680	116	116	Q4EBI3	98.2	98.2	31.1	31.1	1.9999999999999999E-69	1.9999999999999999E-69	ATG	ATG	TAA	TAA
GAGA-0020.Scaffold31.542876-547130	GAGA-0020	Lasius flavus s2	Formicinae	Ankyrin repeat protein	Wolbachia	Rickettsiales	Alphaproteobacteria	Scaffold31	542876-547130	Scaffold31:542876-547130	542876	547130	4254	50	30	26	1	543027	543027	547130	547139	4103	4112	8836	8851	E9P653	67.2	67.099999999999994	84.6	84.6	1.5000000000000002E-185	1.5000000000000002E-185	ATG	ATG	GTG	TAA
GAGA-0020.Scaffold31.613867-616833	GAGA-0020	Lasius flavus s2	Formicinae	Ankyrin repeat protein	Wolbachia	Rickettsiales	Alphaproteobacteria	Scaffold31	613867-616833	Scaffold31:613867-616833	613867	616833	2966	60	67	49	1	613867	613828	616833	617493	2966	3665	457	554	E9P653	99.9	84.9	91.5	96.4	NA	NA	GAA	ATG	CCT	TAA
GAGA-0020.Scaffold31.648280-651311	GAGA-0020	Lasius flavus s2	Formicinae	Ankyrin repeat protein;Ankyrin repeat protein;Ankyrin 3 (Ankyrin repeat family protein)	Wolbachia	Rickettsiales	Alphaproteobacteria	Scaffold31	648280-651311	Scaffold31:648280-651311	648280	651311	3031	37	50	29	3	650259;648324;649528	650259;648324;649528	651311;649610;650067	651317;649610;650067	1052;1286;539	1058;1286;539	363;1313;171	363;1313;171	E9P653;E9P653;Q4EBI3	100.0;98.1;77.1	100.0;98.1;77.1	38.2;44.7;23.2	38.3;44.7;23.2	6.7e-100;5.6e-110;4.7e-36	3.9e-100;5.6e-110;4.7e-36	ATG;ATG;ATG	ATG;ATG;ATG	GTA;TGA;TAA	TAA;TGA;TAA
GAGA-0020.Scaffold31.704726-708354	GAGA-0020	Lasius flavus s2	Formicinae	Ankyrin repeat protein	Wolbachia	Rickettsiales	Alphaproteobacteria	Scaffold31	704726-708354	Scaffold31:704726-708354	704726	708354	3628	49	55	46	1	704770	704770	708354	708360	3584	3590	8046	8047	E9P653	65.900000000000006	65.8	77.400000000000006	77.400000000000006	8.3000000000000002E-233	8.3000000000000002E-233	ATG	ATG	GTA	TAA
GAGA-0020.Scaffold38.658653-660450	GAGA-0020	Lasius flavus s2	Formicinae	Ankyrin repeat protein	Wolbachia	Rickettsiales	Alphaproteobacteria	Scaffold38	658653-660450	Scaffold38:658653-660450	658653	660450	1797	43	34	32	1	658959	658959	660450	660467	1491	1508	17046	17096	E9P653	100	97.2	52.6	51.7	6.7E-97	2.4000000000000001E-94	ATG	ATG	ATG	TAA
GAGA-0020.Scaffold42.25702-28653	GAGA-0020	Lasius flavus s2	Formicinae	Ankyrin repeat protein	Wolbachia	Rickettsiales	Alphaproteobacteria	Scaffold42	25702-28653	Scaffold42:25702-28653	25702	28653	2951	75	71	59	1	25702	25684	28608	28608	2906	2924	3716	3806	E9P653	99.4	99.4	97.7	98.2	NA	NA	ATG	ATG	ATT	TAA
GAGA-0020.Scaffold43.15725-21639	GAGA-0020	Lasius flavus s2	Formicinae	Ankyrin repeat protein	Wolbachia	Rickettsiales	Alphaproteobacteria	Scaffold43	15725-21639	Scaffold43:15725-21639	15725	21639	5914	92	92	62	1	15725	15718	21594	21594	5869	5876	12398	12457	E9P653	45.6	45.7	95.3	95.6	1.3E-257	2.6000000000000002E-258	ATG	ATG	GGT	TAA
GAGA-0024.Scaffold1.16539177-16545088	GAGA-0024	Lasius flavus s1	Formicinae	Ankyrin repeat protein	Wolbachia	Rickettsiales	Alphaproteobacteria	Scaffold1	16539177-16545088	Scaffold1:16539177-16545088	16539177	16545088	5911	17	15	8	1	16539177	16539170	16545043	16545043	5866	5873	8162	8177	E9P653	45.6	45.6	95.3	95.6	1.9999999999999999E-258	3.9000000000000002E-259	ATG	ATG	GGT	TAA
GAGA-0024.Scaffold4.14751348-14751515	GAGA-0024	Lasius flavus s1	Formicinae	hypothetical protein	Wolbachia	Rickettsiales	Alphaproteobacteria	Scaffold4	14751348-14751515	Scaffold4:14751348-14751515	14751348	14751515	167	29	29	29	1	14751348	14751295	14751477	14751477	129	182	0	0	NA	NA	NA	NA	NA	NA	NA	TAA	ATG	TAA	TAA
GAGA-0024.Scaffold5.1578789-1581254	GAGA-0024	Lasius flavus s1	Formicinae	Ankyrin repeat protein	Wolbachia	Rickettsiales	Alphaproteobacteria	Scaffold5	1578789-1581254	Scaffold5:1578789-1581254	1578789	1581254	2465	29	41	25	1	1578789	1578786	1581254	1581707	2465	2921	362	454	E9P653	100	100	86	98.7	NA	NA	GAA	ATG	TTG	TAA
GAGA-0024.Scaffold5.2223940-2227970	GAGA-0024	Lasius flavus s1	Formicinae	Ankyrin repeat protein	Wolbachia	Rickettsiales	Alphaproteobacteria	Scaffold5	2223940-2227970	Scaffold5:2223940-2227970	2223940	2227970	4030	24	34	19	1	2223940	2223933	2227970	2228318	4030	4385	1494	1688	E9P653	74.900000000000006	69	97.8	98	2.8999999999999999E-221	6.3000000000000003E-222	ATG	ATG	GGT	TAA
GAGA-0024.Scaffold5.3223505-3225315	GAGA-0024	Lasius flavus s1	Formicinae	Uncharacterized protein (Fragment);Ankyrin repeats family protein	Wolbachia	Rickettsiales	Alphaproteobacteria	Scaffold5	3223505-3225315	Scaffold5:3223505-3225315	3223505	3225315	1810	46	47	36	2	3223957;3223505	3223957;3223487	3225315;3223960	3226197;3223960	1358;455	2240;473	491;476	862;494	A0A1Q3W6E5;A0A5B9JVP8	92.5;100.0	93.8;100.0	51.6;44.4	77.5;45.8	2.8e-78;1.7e-49	NA;8.9e-51	GAA;ATG	ATG;ATG	TGA;ATT	TGA;TAA
GAGA-0024.Scaffold6.5256001-5259552	GAGA-0024	Lasius flavus s1	Formicinae	Ankyrin repeat protein	Wolbachia	Rickettsiales	Alphaproteobacteria	Scaffold6	5256001-5259552	Scaffold6:5256001-5259552	5256001	5259552	3551	26	23	10	1	5256001	5255732	5259400	5259400	3399	3668	2351	2952	E9P653	76.099999999999994	70.5	80	80	NA	3.2E-203	ATG	ATG	TAG	TAA
GAGA-0024.Scaffold6.5397922-5400444	GAGA-0024	Lasius flavus s1	Formicinae	Ankyrin repeat protein	Wolbachia	Rickettsiales	Alphaproteobacteria	Scaffold6	5397922-5400444	Scaffold6:5397922-5400444	5397922	5400444	2522	41	47	34	1	5397922	5397883	5400399	5400399	2477	2516	481	482	E9P653	77	75.900000000000006	66.8	66.8	4.0999999999999998E-188	4.1999999999999998E-188	ATG	ATG	CCT	TAA
GAGA-0024.Scaffold7.6739609-6740694	GAGA-0024	Lasius flavus s1	Formicinae	Ankyrin 3 (Ankyrin repeat family protein)	Wolbachia	Rickettsiales	Alphaproteobacteria	Scaffold7	6739609-6740694	Scaffold7:6739609-6740694	6739609	6740694	1085	33	31	26	1	6739609	6738938	6740694	6741049	1085	2111	5124	8765	Q4EBI3	92.8	83.5	96.9	82	NA	NA	ATT	ATG	TAA	TAG
GAGA-0025.Scaffold15.4178206-4178515	GAGA-0025	Megaponera analis	Ponerinae	hypothetical protein	Spiroplasma	Entoplasmatales	Mollicutes	Scaffold15	4178206-4178515	Scaffold15:4178206-4178515	4178206	4178515	309	39	46	37	0	NA	NA	NA	NA	NA	NA	NA	NA	NA	NA	NA	NA	NA	NA	NA	NA	NA	NA	NA
GAGA-0025.Scaffold15.4180270-4181120	GAGA-0025	Megaponera analis	Ponerinae	hypothetical protein;hypothetical protein	Spiroplasma	Entoplasmatales	Mollicutes	Scaffold15	4180270-4181120	Scaffold15:4180270-4181120	4180270	4181120	850	35	36	35	2	4180587;4181039	4180587;4180587	4180733;4181120	4180733;4180733	146;81	146;146	12;14	12;12	NA;NA	NA;NA	NA;NA	NA;NA	NA;NA	NA;NA	NA;NA	TTG;ATG	TTG;TTG	TAA;CAT	TAA;TAA
GAGA-0028.Scaffold119.58501-58755	GAGA-0028	Myrmica rubra	Myrmicinae	Ankyrin 3 (Ankyrin repeat family protein)	Wolbachia	Rickettsiales	Alphaproteobacteria	Scaffold119	58501-58755	Scaffold119:58501-58755	58501	58755	254	22	22	22	1	58501	57502	58755	58759	254	1257	2	66	Q4EBI3	100	91.9	13.9	40.9	7.9999999999999998E-28	4.5999999999999999E-117	ATA	ATG	AGA	AAG
GAGA-0028.Scaffold148.371628-371851	GAGA-0028	Myrmica rubra	Myrmicinae	Periplasmic serine endoprotease DegP-like (EC 3.4.21.107)	Wolbachia	Rickettsiales	Alphaproteobacteria	Scaffold148	371628-371851	Scaffold148:371628-371851	371628	371851	223	20	17	15	1	371628	371595	371851	371885	223	290	0	0	A0A218KP59	100	77.099999999999994	14.9	14.9	2.4999999999999999E-29	2.4999999999999999E-29	GTT	GTG	TAT	TGA
GAGA-0028.Scaffold15.3417776-3420446	GAGA-0028	Myrmica rubra	Myrmicinae	Ankyrin repeat protein	Wolbachia	Rickettsiales	Alphaproteobacteria	Scaffold15	3417776-3420446	Scaffold15:3417776-3420446	3417776	3420446	2670	36	33	33	1	3417776	3417763	3420446	3420435	2670	2672	88	88	E9P653	95.7	95.7	85.5	85.6	NA	NA	TGT	ATG	AGA	TGA
GAGA-0028.Scaffold15.3637537-3642723	GAGA-0028	Myrmica rubra	Myrmicinae	Ankyrin repeats family protein;Ankyrin repeat protein;NA;NA	Wolbachia	Rickettsiales	Alphaproteobacteria	Scaffold15	3637537-3642723	Scaffold15:3637537-3642723	3637537	3642723	5186	26	24	17	4	3637537;3639971;3638603;3638757	3636538;3639971;3638603;3638757	3638309;3642723;3638830;3638984	3638309;3642727;3638830;3638984	772;2752;227;227	1771;2756;227;227	133;860;48;16	151;860;48;16	A0A5B9JVP8;E9P653;NA;NA	98.4;96.2;NA;NA	99.2;96.0;NA;NA	73.1;85.6;NA;NA	67.4;85.6;NA;NA	2.1e-82;NA;NA;NA	2.9e-142;NA;NA;NA	CAG;ATA;ATG;ATG	ATG;ATG;ATG;ATG	TGA;TGA;TGA;TAA	TGA;TGA;TGA;TAA
GAGA-0028.Scaffold17.137169-139671	GAGA-0028	Myrmica rubra	Myrmicinae	Ankyrin repeat protein	Wolbachia	Rickettsiales	Alphaproteobacteria	Scaffold17	137169-139671	Scaffold17:137169-139671	137169	139671	2502	16	21	15	1	137169	137156	139671	139675	2502	2519	3199	3200	E9P653	98.7	98.1	87.8	87.9	NA	NA	ATA	ATG	AGA	TGA
GAGA-0028.Scaffold17.1745282-1749632	GAGA-0028	Myrmica rubra	Myrmicinae	Ankyrin repeat protein;Ankyrin repeat protein	Wolbachia	Rickettsiales	Alphaproteobacteria	Scaffold17	1745282-1749632	Scaffold17:1745282-1749632	1745282	1749632	4350	34	34	17	2	1745282;1747108	1745269;1747108	1746609;1749632	1746609;1749636	1327;2524	1340;2528	46;9	46;9	E9P653;E9P653	98.2;91.5	97.5;91.3	47.0;85.5	47.1;85.5	1.5e-100;NA	8.6e-101;NA	TTG;ATA	TTG;ATG	AGA;TGA	TGA;TGA
GAGA-0028.Scaffold17.1837826-1842490	GAGA-0028	Myrmica rubra	Myrmicinae	Ankyrin repeat protein;Ankyrin repeat protein	Wolbachia	Rickettsiales	Alphaproteobacteria	Scaffold17	1837826-1842490	Scaffold17:1837826-1842490	1837826	1842490	4664	16	12	11	2	1837826;1842281	1837821;1842281	1842236;1842490	1842236;1842502	4410;209	4415;221	110;36	110;37	E9P653;E9P653	43.4;100.0	43.4;95.9	68.1;7.4	68.1;7.4	9.8e-207;4.6e-23	9.8e-207;4.6e-23	TAC;TTG	ATG;TTG	TAA;GAA	TAA;TGA
GAGA-0028.Scaffold17.3507602-3510478	GAGA-0028	Myrmica rubra	Myrmicinae	Ankyrin repeat protein	Wolbachia	Rickettsiales	Alphaproteobacteria	Scaffold17	3507602-3510478	Scaffold17:3507602-3510478	3507602	3510478	2876	25	23	18	1	3507602	3507564	3510478	3510482	2876	2918	761	773	E9P653	100	99	98.1	98.5	NA	NA	ATA	ATG	TAG	TAG
GAGA-0028.Scaffold17.79380-82378	GAGA-0028	Myrmica rubra	Myrmicinae	Ankyrin repeats family protein;Ankyrin repeat protein;Ankyrin 3 (Ankyrin repeat family protein);NA;NA	Wolbachia	Rickettsiales	Alphaproteobacteria	Scaffold17	79380-82378	Scaffold17:79380-82378	79380	82378	2998	22	27	19	5	80591;81965;79380;81310;81589	80591;81965;79375;81310;81589	80944;82378;80523;81573;81837	80944;82399;80523;81573;81837	353;413;1143;263;248	353;434;1148;263;248	271;6;1181;21;23	271;6;1181;21;23	A0A5B9JVP8;E9P653;Q4EBI3;NA;NA	97.4;100.0;80.8;NA;NA	97.4;95.8;80.4;NA;NA	32.7;14.8;92.3;NA;NA	32.7;14.8;92.3;NA;NA	4.4e-42;4.7e-52;NA;NA;NA	4.4e-42;4.7e-52;NA;NA;NA	ATG;TTG;TAC;ATG;ATG	ATG;TTG;ATG;ATG;ATG	TAA;GAA;TAG;TAG;TGA	TAA;TGA;TAG;TAG;TGA
GAGA-0028.Scaffold18.2143551-2146148	GAGA-0028	Myrmica rubra	Myrmicinae	Ankyrin repeat protein	Wolbachia	Rickettsiales	Alphaproteobacteria	Scaffold18	2143551-2146148	Scaffold18:2143551-2146148	2143551	2146148	2597	49	47	39	1	2143551	2143444	2146148	2146152	2597	2708	1949	1973	E9P653	77.3	74.3	67.099999999999994	67.2	5.3000000000000001E-210	4.2000000000000003E-210	ATA	ATG	TAG	TAA
GAGA-0028.Scaffold187.324335-327944	GAGA-0028	Myrmica rubra	Myrmicinae	Ankyrin repeats family protein;Ankyrin repeat protein;Ankyrin 3 (Ankyrin repeat family protein)	Wolbachia	Rickettsiales	Alphaproteobacteria	Scaffold187	324335-327944	Scaffold187:324335-327944	324335	327944	3609	27	27	21	3	324335;325043;326590	324297;325043;326590	325025;325894;327944	325025;325894;327948	690;851;1354	728;851;1358	319;274;320	333;274;320	A0A5B9JVP8;E9P653;Q4EBI3	100.0;99.3;91.8	96.3;99.3;91.4	73.4;30.5;66.1	74.2;30.5;66.1	3.3e-75;3.3e-106;6.9e-114	1.7e-75;3.3e-106;7.0e-114	ATG;TTG;ATA	ATG;TTG;ATG	TAG;TAG;TGA	TAG;TAG;TGA
GAGA-0028.Scaffold21.3359731-3360234	GAGA-0028	Myrmica rubra	Myrmicinae	Ankyrin repeats family protein	Wolbachia	Rickettsiales	Alphaproteobacteria	Scaffold21	3359731-3360234	Scaffold21:3359731-3360234	3359731	3360234	503	16	19	15	1	3359731	3358732	3360213	3360213	482	1481	68	417	A0A5B9JVP8	100	100	44.7	53.5	1.9E-50	1.9999999999999998E-186	CTT	CAT	TAA	TAA
GAGA-0028.Scaffold217.297424-303832	GAGA-0028	Myrmica rubra	Myrmicinae	Transposase;Transposase;DNA repair protein RadC;DNA repair protein RadC;Helix-turn-helix transcriptional regulator;Helix-turn-helix transcriptional regulator;Uncharacterized protein;ISSod10, transposase OrfA, putative (Winged helix-turn helix family protein);Transposase family protein	Wolbachia	Rickettsiales	Alphaproteobacteria	Scaffold217	297424-303832	Scaffold217:297424-303832	297424	303832	6408	25	38	19	9	297424;302963;299543;301250;301956;298489;303224;300948;300742	297417;302963;299543;301250;301956;298489;303224;300948;300742	298337;303211;300010;301756;302327;299343;303832;301205;301026	298337;303211;300010;301756;302327;299343;303835;301205;301026	913;248;467;506;371;854;608;257;284	920;248;467;506;371;854;611;257;284	50;39;2;1;0;0;144;27;1	50;39;2;1;0;0;144;27;1	A0A178GX68;A0A178GYM1;A0A6M5E574;A0A6M5E574;A0A7G5CAE0;A0A7G5CAE0;B6Y9U6;Q4EAU6;Q4EDH0	96.7;89.0;98.1;92.9;100.0;100.0;100.0;84.7;91.5	97.1;89.0;98.1;92.9;100.0;100.0;100.0;84.7;91.5	97.3;23.9;68.5;70.3;39.7;93.0;63.3;44.4;27.0	98.3;23.9;68.5;70.3;39.7;93.0;63.3;44.4;27.0	NA;6.6e-30;8.0e-76;6.5e-78;5.8e-50;NA;3.2e-88;1.0e-27;1.1e-32	NA;6.6e-30;8.0e-76;6.5e-78;5.8e-50;NA;3.2e-88;1.0e-27;1.1e-32	ATG;ATG;ATG;ATG;TTG;TTG;ATG;ATG;GTG	ATG;ATG;ATG;ATG;TTG;TTG;ATG;ATG;GTG	AAA;TAG;TAG;TAA;TAA;TAA;CTG;TAA;TAA	TAA;TAG;TAG;TAA;TAA;TAA;TAA;TAA;TAA
GAGA-0028.Scaffold22.1297266-1298876	GAGA-0028	Myrmica rubra	Myrmicinae	Ankyrin repeat domain protein;Ankyrin repeat domain protein;NA	Wolbachia	Rickettsiales	Alphaproteobacteria	Scaffold22	1297266-1298876	Scaffold22:1297266-1298876	1297266	1298876	1610	21	25	21	3	1297266;1297531;1298373	1297531;1297531;1297531	1297459;1297833;1298531	1297833;1297833;1297833	193;302;158	302;302;302	29;45;20	48;48;48	C0R3E9;C0R3E9;NA	92.1;100.0;NA	100.0;100.0;100.0	2.3;4.0;NA	4.0;4.0;4.0	2.4e-16;1.8e-35;NA	1.8e-35;1.8e-35;1.8e-35	AAC;TTG;GTG	TTG;TTG;TTG	TAA;TAA;TAA	TAA;TAA;TAA
GAGA-0028.Scaffold245.97502-97693	GAGA-0028	Myrmica rubra	Myrmicinae	hypothetical protein;hypothetical protein	Wolbachia	Rickettsiales	Alphaproteobacteria	Scaffold245	97502-97693	Scaffold245:97502-97693	97502	97693	191	22	22	22	2	97502;97619	97438;97438	97563;97693	97563;97563	61;74	125;125	0;0	0;0	NA;NA	NA;NA	NA;NA	NA;NA	NA;NA	NA;NA	NA;NA	ATG;AAA	ATG;ATG	TGG;TAA	TAA;TAA
GAGA-0028.Scaffold26.1610767-1611574	GAGA-0028	Myrmica rubra	Myrmicinae	Ankyrin repeats family protein;Ankyrin repeats family protein	Wolbachia	Rickettsiales	Alphaproteobacteria	Scaffold26	1610767-1611574	Scaffold26:1610767-1611574	1610767	1611574	807	21	25	20	2	1610767;1611241	1610555;1611241	1611235;1611574	1611235;1612098	468;333	680;857	1;7	14;14	A0A5B9JVP8;A0A5B9JVP8	100.0;97.3	70.4;47.7	45.3;32.7	46.1;39.5	3.5e-55;1.2e-34	2.8e-55;5.0e-38	ATG;TAA	ATG;TTG	TAG;TAA	TAA;TAA
GAGA-0028.Scaffold26.1660761-1663938	GAGA-0028	Myrmica rubra	Myrmicinae	Ankyrin repeat protein;Ankyrin 3 (Ankyrin repeat family protein)	Wolbachia	Rickettsiales	Alphaproteobacteria	Scaffold26	1660761-1663938	Scaffold26:1660761-1663938	1660761	1663938	3177	17	17	17	2	1660761;1663727	1660750;1663727	1663677;1663938	1663677;1663942	2916;211	2927;215	98;3	98;3	E9P653;Q4EBI3	60.6;92.8	60.4;91.5	62.6;10.4	62.6;10.5	1.3e-209;2.6e-21	1.3e-209;1.9e-21	ATG;ATA	ATG;ATG	TAG;TAA	TAA;TAA
GAGA-0028.Scaffold26.1672022-1677598	GAGA-0028	Myrmica rubra	Myrmicinae	Ankyrin repeats family protein;Ankyrin repeat protein;Ankyrin 3 (Ankyrin repeat family protein);Ankyrin 3 (Ankyrin repeat family protein)	Wolbachia	Rickettsiales	Alphaproteobacteria	Scaffold26	1672022-1677598	Scaffold26:1672022-1677598	1672022	1677598	5576	28	37	24	4	1672022;1672560;1675013;1676064	1671993;1672560;1675013;1676064	1672439;1674350;1675534;1677598	1672439;1674350;1675534;1677602	417;1790;521;1534	446;1790;521;1538	26;33;7;44	26;33;7;44	A0A5B9JVP8;E9P653;Q4EBI3;Q4EBI3	96.4;93.0;92.5;96.3	90.5;93.0;92.5;96.1	38.4;61.8;32.3;83.6	38.4;61.8;32.3;83.8	3.0e-43;1.8e-211;5.6e-45;NA	3.0e-43;1.8e-211;5.6e-45;NA	ATG;GTG;ATG;ATA	ATG;GTG;ATG;ATG	TTT;TAG;TAA;TAA	TAA;TAG;TAA;TAA
GAGA-0028.Scaffold26.1790809-1793595	GAGA-0028	Myrmica rubra	Myrmicinae	Ankyrin repeat protein	Wolbachia	Rickettsiales	Alphaproteobacteria	Scaffold26	1790809-1793595	Scaffold26:1790809-1793595	1790809	1793595	2786	16	19	12	1	1790809	1790804	1793595	1793632	2786	2828	335	345	E9P653	100	98.9	98.1	98.5	NA	NA	TAC	ATG	AGC	TAG
GAGA-0028.Scaffold283.299552-303004	GAGA-0028	Myrmica rubra	Myrmicinae	Uncharacterized protein;Uncharacterized protein;Ankyrin repeat domain-containing protein (Fragment);Ankyrin repeat domain protein;Uncharacterized protein;NA;NA	Wolbachia	Rickettsiales	Alphaproteobacteria	Scaffold283	299552-303004	Scaffold283:299552-303004	299552	303004	3452	24	46	20	7	301008;299662;300650;301904;302648;299552;300145	301904;300145;301008;302368;302648;299662;300650	301907;299979;300799;302239;303004;299658;300270	302239;300270;301907;302550;303010;299979;300799	899;317;149;335;356;106;125	335;125;899;182;362;317;149	10;10;2;4;4;19;2	4;2;10;0;4;24;2	A0A176Q8J2;A0A5C0YSC8;A0A6H2NUC3;B6Y9L2;Q73HN8;NA;NA	95.0;62.9;98.0;98.2;94.9;NA;NA	98.2;NA;95.0;NA;93.3;62.9;98.0	35.0;6.1;20.5;2.1;34.0;NA;NA	2.1;NA;35.0;NA;34.0;6.1;20.5	7.8e-24;1.1e-13;1.1e-08;2.0e-18;1.6e-28;NA;NA	2.0e-18;NA;7.8e-24;NA;1.6e-28;1.1e-13;1.1e-08	ATG;TTG;ATG;TTG;CGT;ATG;ATG	TTG;ATG;ATG;ATG;ATG;TTG;ATG	TGA;TAA;TGA;TAG;TAA;TGA;TAG	TAG;TAG;TGA;TAG;TAA;TAA;TGA
GAGA-0028.Scaffold304.96197-98794	GAGA-0028	Myrmica rubra	Myrmicinae	Ankyrin repeat protein	Wolbachia	Rickettsiales	Alphaproteobacteria	Scaffold304	96197-98794	Scaffold304:96197-98794	96197	98794	2597	19	24	19	1	96197	96155	98794	98806	2597	2651	304	304	E9P653	99.9	98	85.6	85.6	NA	NA	GAC	ATG	GAA	TGA
GAGA-0028.Scaffold32.266132-268636	GAGA-0028	Myrmica rubra	Myrmicinae	Ankyrin repeat protein	Wolbachia	Rickettsiales	Alphaproteobacteria	Scaffold32	266132-268636	Scaffold32:266132-268636	266132	268636	2504	19	13	11	1	266132	266094	268636	268640	2504	2546	30	30	E9P653	100	98.8	98.1	98.5	NA	NA	ATA	ATG	TAG	TAG
GAGA-0028.Scaffold349.122730-125124	GAGA-0028	Myrmica rubra	Myrmicinae	Ankyrin repeat protein;Ankyrin 3 (Ankyrin repeat family protein)	Wolbachia	Rickettsiales	Alphaproteobacteria	Scaffold349	122730-125124	Scaffold349:122730-125124	122730	125124	2394	13	15	13	2	122730;124363	122671;124363	123729;125124	123729;125721	999;761	1058;1358	0;36	0;40	E9P653;Q4EBI3	99.4;81.8	94.6;88.7	35.1;34.4	35.3;69.5	1.2e-119;5.8e-45	1.0e-119;8.2e-123	TTG;CTT	TTG;ATG	GAA;TAA	TAA;TAA
GAGA-0028.Scaffold4.7783586-7787641	GAGA-0028	Myrmica rubra	Myrmicinae	Ankyrin repeat protein;Ankyrin repeat protein;NA	Wolbachia	Rickettsiales	Alphaproteobacteria	Scaffold4	7783586-7787641	Scaffold4:7783586-7787641	7783586	7787641	4055	40	23	18	3	7785720;7783835;7785523	7785720;7783835;7785523	7787641;7785076;7785690	7787645;7785076;7785690	1921;1241;167	1925;1241;167	309;375;0	309;375;0	E9P653;E9P653;NA	94.1;99.0;NA	93.9;99.0;NA	64.1;43.7;NA	64.2;43.7;NA	6.9e-225;1.4e-147;NA	5.3e-225;1.4e-147;NA	ATA;ATG;ATG	ATG;ATG;ATG	TAG;TAA;TGA	TAG;TAA;TGA
GAGA-0028.Scaffold4.7911209-7914591	GAGA-0028	Myrmica rubra	Myrmicinae	Ankyrin repeat protein;Ankyrin 3 (Ankyrin repeat family protein)	Wolbachia	Rickettsiales	Alphaproteobacteria	Scaffold4	7911209-7914591	Scaffold4:7911209-7914591	7911209	7914591	3382	18	12	6	2	7911209;7913596	7911171;7913596	7912823;7914591	7912823;7915110	1614;995	1652;1514	132;63	132;119	E9P653;Q4EBI3	100.0;96.1	98.4;96.0	57.5;50.2	57.8;66.1	3.5e-211;4.1e-80	1.6e-211;6.4e-119	TTG;ACA	TTG;ATG	TAG;TAA	TAG;TAA
GAGA-0028.Scaffold4.8001017-8003348	GAGA-0028	Myrmica rubra	Myrmicinae	Ankyrin repeat protein;Ankyrin repeat protein;Ankyrin 3 (Ankyrin repeat family protein)	Wolbachia	Rickettsiales	Alphaproteobacteria	Scaffold4	8001017-8003348	Scaffold4:8001017-8003348	8001017	8003348	2331	31	22	18	3	8001017;8002679;8003112	8000979;8002679;8003112	8002661;8003164;8003348	8002661;8003164;8003387	1644;485;236	1682;485;275	2095;313;281	2125;313;281	E9P653;E9P653;Q4EBI3	100.0;83.2;83.3	98.4;83.2;86.8	58.6;77.0;11.0	58.9;77.0;13.3	1.6e-198;NA;7.2e-16	7.2e-199;NA;1.8e-19	TTG;ATG;AAA	TTG;ATG;TTG	TAG;TAG;TGA	TAG;TAG;TGA
GAGA-0028.Scaffold4.8032355-8034749	GAGA-0028	Myrmica rubra	Myrmicinae	Ankyrin repeat protein	Wolbachia	Rickettsiales	Alphaproteobacteria	Scaffold4	8032355-8034749	Scaffold4:8032355-8034749	8032355	8034749	2394	25	25	21	1	8032355	8032317	8034749	8035424	2394	3107	2007	2345	E9P653	100	88.3	85.4	97.4	NA	NA	CTT	ATG	TAG	TAG
GAGA-0028.Scaffold42.1475721-1478092	GAGA-0028	Myrmica rubra	Myrmicinae	Ankyrin repeat protein;Ankyrin repeat protein;Ankyrin repeat protein	Wolbachia	Rickettsiales	Alphaproteobacteria	Scaffold42	1475721-1478092	Scaffold42:1475721-1478092	1475721	1478092	2371	28	27	24	3	1475721;1476915;1476583	1475313;1476915;1476583	1476494;1478092;1476831	1476494;1478096;1476831	773;1177;248	1181;1181;248	0;4;0	0;4;0	E9P653;E9P653;E9P653	100.0;98.2;98.8	97.7;97.7;98.8	27.1;40.9;8.7	40.9;40.9;8.7	8.2e-87;3.8e-102;2.0e-26	3.8e-102;3.8e-102;2.0e-26	ACG;ATA;TTG	ATG;ATG;TTG	TAA;TAA;TGA	TAA;TAA;TGA
GAGA-0028.Scaffold54.1099744-1103406	GAGA-0028	Myrmica rubra	Myrmicinae	Ankyrin repeat protein	Wolbachia	Rickettsiales	Alphaproteobacteria	Scaffold54	1099744-1103406	Scaffold54:1099744-1103406	1099744	1103406	3662	46	49	41	1	1099744	1099706	1103406	1103410	3662	3704	715	719	E9P653	77.3	76.7	97.8	98.1	NA	NA	ATA	ATG	TAG	TAG
GAGA-0028.Scaffold546.17406-18491	GAGA-0028	Myrmica rubra	Myrmicinae	Ankyrin repeat protein	Wolbachia	Rickettsiales	Alphaproteobacteria	Scaffold546	17406-18491	Scaffold546:17406-18491	17406	18491	1085	11	10	10	1	17406	17393	18491	19387	1085	1994	1	11	E9P653	100	71.5	38.5	53.4	3.0000000000000002E-87	8.5000000000000002E-125	TGT	ATG	AGA	TGA
GAGA-0028.Scaffold58.1072896-1074621	GAGA-0028	Myrmica rubra	Myrmicinae	Ankyrin repeat protein;Ankyrin 3 (Ankyrin repeat family protein)	Wolbachia	Rickettsiales	Alphaproteobacteria	Scaffold58	1072896-1074621	Scaffold58:1072896-1074621	1072896	1074621	1725	17	12	10	2	1073290;1072896	1073290;1072891	1074600;1073220	1074600;1073220	1310;324	1310;329	655;212	655;212	E9P653;Q4EBI3	99.8;100.0	99.8;99.1	46.4;19.3	46.4;19.4	1.1e-97;2.3e-22	1.1e-97;1.7e-22	ATG;TAC	ATG;ATG	TAA;TAA	TAA;TAA
GAGA-0028.Scaffold6.5471347-5476103	GAGA-0028	Myrmica rubra	Myrmicinae	Ankyrin repeat domain protein;Ankyrin repeat domain protein;Ankyrin repeat domain protein	Wolbachia	Rickettsiales	Alphaproteobacteria	Scaffold6	5471347-5476103	Scaffold6:5471347-5476103	5471347	5476103	4756	24	20	20	3	5475703;5471347;5475333	5475703;5470348;5475333	5476103;5475100;5475647	5476134;5475100;5475647	400;3753;314	431;4752;314	0;54;0	0;54;0	B6Y9L2;B6Y9L2;M9WQI6	100.0;99.9;82.7	93.7;99.9;82.7	2.8;25.0;3.6	2.8;31.8;3.6	8.8e-51;6.8e-310;1.9e-29	3.1e-51;0.0e+00;1.9e-29	ATG;GAG;ATG	ATG;ACT;ATG	CAT;TAA;TAA	TAG;TAA;TAA
GAGA-0028.Scaffold6.5488891-5497555	GAGA-0028	Myrmica rubra	Myrmicinae	Uncharacterized protein;Ankyrin repeat domain protein;Ankyrin repeat domain protein;Ankyrin repeat domain protein;Ankyrin repeat domain protein;Ankyrin repeat domain protein;Ankyrin repeat domain protein;NA;NA;NA	Wolbachia	Rickettsiales	Alphaproteobacteria	Scaffold6	5488891-5497555	Scaffold6:5488891-5497555	5488891	5497555	8664	27	20	11	10	5488891;5491990;5491449;5491094;5495613;5497154;5496784;5491842;5495298;5490922	5496784;5491842;5491094;5490922;5495298;5497154;5495613;5491449;5491990;5488452	5490962;5492262;5491622;5491258;5496551;5497555;5497098;5492033;5495459;5491125	5497098;5492033;5491258;5491125;5495459;5497585;5496551;5491622;5492262;5490962	2071;272;173;164;938;401;314;191;161;203	314;191;164;203;161;431;938;173;272;2510	0;4;0;0;1;3;0;0;7;0	0;0;0;0;7;3;1;0;4;9	A0A218KPB3;B6Y9L2;B6Y9L2;B6Y9L2;B6Y9L2;B6Y9L2;M9WQI6;NA;NA;NA	92.0;67.8;98.2;83.3;95.2;100.0;82.7;NA;NA;NA	82.7;NA;83.3;NA;NA;93.7;95.2;98.2;67.8;92.8	16.2;1.3;1.2;1.0;5.9;2.8;3.6;NA;NA;NA	3.6;NA;1.0;NA;NA;2.8;5.9;1.2;1.3;19.5	1.1e-194;5.0e-09;6.1e-07;2.1e-07;1.4e-58;3.0e-51;1.9e-29;NA;NA;NA	1.9e-29;NA;2.1e-07;NA;NA;3.1e-51;1.4e-58;6.1e-07;5.0e-09;1.3e-229	AAA;ATG;TTG;TTG;TTG;ATG;ATG;ATG;ATG;TTG	ATG;ATG;TTG;TTG;ATG;ATG;TTG;TTG;ATG;TTG	TAA;TAA;TGA;TGA;TAA;ATT;TAA;TGA;TAG;TAA	TAA;TGA;TGA;TAA;TAG;TAG;TAA;TGA;TAA;TAA
GAGA-0028.Scaffold61.846268-850012	GAGA-0028	Myrmica rubra	Myrmicinae	Transposase;Uncharacterized protein;DNA repair protein RadC;Helix-turn-helix transcriptional regulator;ISSod10, transposase OrfA, putative (Winged helix-turn helix family protein);Terminase, large subunit (DNA-packaging protein) (Large terminase protein) [Includes: Endonuclease (EC 3.1.21.4); Helicase (EC 3.6.4.12); ATPase (EC 3.6.4.-)]	Wolbachia	Rickettsiales	Alphaproteobacteria	Scaffold61	846268-850012	Scaffold61:846268-850012	846268	850012	3744	24	21	20	6	846268;849569;848330;847276;848881;849714	846255;849569;848330;847276;848881;849714	847124;849721;848836;848130;849342;850012	847124;849721;848836;848130;849342;850025	856;152;506;854;461;298	869;152;506;854;461;311	12;15;0;5;2;19	12;15;0;5;2;20	A0A178GX68;A0A3T0GHM4;A0A6M5E574;A0A7G5CAE0;Q4EAU6;Q9JMM7	100.0;66.0;92.9;100.0;90.8;93.9	99.0;66.0;92.9;100.0;90.8;89.3	99.3;42.9;70.3;93.0;85.8;15.1	99.7;42.9;70.3;93.0;85.8;15.1	NA;1.3e-09;1.9e-77;NA;NA;1.9e-40	NA;1.3e-09;1.9e-77;NA;NA;1.8e-40	ATG;ATG;ATG;TTG;ATG;AAG	ATG;ATG;ATG;TTG;ATG;GTG	TAA;TAA;TAA;TAA;TAA;TAA	TAA;TAA;TAA;TAA;TAA;TAA
GAGA-0028.Scaffold61.852812-855906	GAGA-0028	Myrmica rubra	Myrmicinae	Transposase;DNA repair protein RadC;DNA repair protein RadC;Helix-turn-helix transcriptional regulator;Helix-turn-helix transcriptional regulator;Uncharacterized protein;ISSod10, transposase OrfA, putative (Winged helix-turn helix family protein)	Wolbachia	Rickettsiales	Alphaproteobacteria	Scaffold61	852812-855906	Scaffold61:852812-855906	852812	855906	3094	23	16	12	7	855520;853336;853566;854577;854038;855288;852830	855520;853336;853566;854577;854038;855288;852830	855906;853539;853838;854888;854400;855578;853291	855918;853539;853838;854888;854400;855578;853291	386;203;272;311;362;290;461	398;203;272;311;362;290;461	0;0;0;0;0;0;2	0;0;0;0;0;0;2	A0A178GX68;A0A6M5E574;A0A6M5E574;A0A7G5CAE0;A0A7G5CAE0;B6Y9U6;Q4EAU6	84.5;82.1;94.4;99.0;100.0;95.8;90.8	82.6;82.1;94.4;99.0;100.0;95.8;90.8	95.0;24.8;38.3;33.8;39.7;27.0;85.8	95.0;24.8;38.3;33.8;39.7;27.0;85.8	NA;2.3e-19;3.3e-37;8.8e-43;9.1e-48;1.0e-43;NA	NA;2.3e-19;3.3e-37;8.8e-43;9.1e-48;1.0e-43;NA	TTG;ATG;ATG;TTG;TTG;ATG;ATG	TTG;ATG;ATG;TTG;TTG;ATG;ATG	AAG;TAA;TAA;TAA;TAA;TGA;TAA	TAA;TAA;TAA;TAA;TAA;TGA;TAA
GAGA-0028.Scaffold778.28379-30773	GAGA-0028	Myrmica rubra	Myrmicinae	Ankyrin repeat protein	Wolbachia	Rickettsiales	Alphaproteobacteria	Scaffold778	28379-30773	Scaffold778:28379-30773	28379	30773	2394	20	20	13	1	28379	28366	30773	30777	2394	2411	1530	1530	E9P653	96	95.4	85.5	85.6	NA	NA	ATA	ATG	AGA	TGA
GAGA-0028.Scaffold84.1125903-1128713	GAGA-0028	Myrmica rubra	Myrmicinae	Ankyrin repeat protein;Ankyrin 3 (Ankyrin repeat family protein)	Wolbachia	Rickettsiales	Alphaproteobacteria	Scaffold84	1125903-1128713	Scaffold84:1125903-1128713	1125903	1128713	2810	15	19	10	2	1126465;1125903	1126465;1125898	1128713;1126452	1128750;1126452	2248;549	2285;554	950;278	970;278	E9P653;Q4EBI3	100.0;100.0	98.8;99.5	78.1;29.8	78.4;30.0	NA;2.4e-72	NA;1.8e-72	TTG;TAC	TTG;ATG	AGC;TAA	TAG;TAA
GAGA-0028.Scaffold9.5062430-5065214	GAGA-0028	Myrmica rubra	Myrmicinae	Ankyrin repeat protein;Ankyrin 3 (Ankyrin repeat family protein)	Wolbachia	Rickettsiales	Alphaproteobacteria	Scaffold9	5062430-5065214	Scaffold9:5062430-5065214	5062430	5065214	2784	21	21	12	2	5063014;5062430	5063014;5062425	5065214;5063066	5065251;5063066	2200;636	2237;641	575;86	592;86	E9P653;Q4EBI3	99.6;94.3	98.4;93.9	77.1;32.6	77.4;32.7	NA;9.8e-78	NA;7.7e-78	ATG;TAC	ATG;ATG	AGC;TGA	TAG;TGA
GAGA-0063.Scaffold16.7170525-7171201	GAGA-0063	Neoponera goeldii	Ponerinae	Tetratricopeptide repeat protein	Wolbachia	Rickettsiales	Alphaproteobacteria	Scaffold16	7170525-7171201	Scaffold16:7170525-7171201	7170525	7171201	676	28	26	24	1	7170551	7170551	7171201	7172201	NA	NA	NA	NA	A0A4Y6UMV0	100	100	11.2	26.8	2E-73	2.9000000000000001E-104	TTA	TTT	TAA	TAA
GAGA-0063.Scaffold213.46449-47449	GAGA-0063	Neoponera goeldii	Ponerinae	Ankyrin repeat domain protein	Wolbachia	Rickettsiales	Alphaproteobacteria	Scaffold213	46449-47449	Scaffold213:46449-47449	46449	47449	1000	15	15	14	1	46809	46809	47449	48449	NA	NA	NA	NA	C0R3E9	96.2	94.5	8.1999999999999993	21.5	1.3000000000000001E-69	5.4000000000000005E-119	TAA	ATG	TAG	TAG
GAGA-0080.Scaffold7.277737-279231	GAGA-0080	Pheidole pallidula	Myrmicinae	UDP-N-acetylglucosamine 1-carboxyvinyltransferase (EC 2.5.1.7) (Enoylpyruvate transferase) (UDP-N-acetylglucosamine enolpyruvyl transferase) (EPT);Flavin-dependent thymidylate synthase (FDTS) (EC 2.1.1.148) (FAD-dependent thymidylate synthase) (Thymidylate synthase ThyX) (TS) (TSase)	Wolbachia	Rickettsiales	Alphaproteobacteria	Scaffold7	277737-279231	Scaffold7:277737-279231	277737	279231	1494	53	55	49	2	277855;277737	277855;277855	279228;277845	279141;279141	1373;108	1286;1286	330;157	395;395	A0A060Q018;A0A218KN31	100.0;100.0	98.6;98.6	100.0;12.5	92.4;92.4	NA;4.2e-08	NA;NA	ATG;ATG	ATG;ATG	TGA;ATT	TGA;TGA
GAGA-0080.Scaffold7.285141-285763	GAGA-0080	Pheidole pallidula	Myrmicinae	3-oxoacyl-[acyl-carrier-protein] synthase 2 (EC 2.3.1.179)	Wolbachia	Rickettsiales	Alphaproteobacteria	Scaffold7	285141-285763	Scaffold7:285141-285763	285141	285763	622	36	34	34	1	285212	285212	285763	285769	551	557	22	22	Q5GRP7	NA	NA	NA	NA	NA	NA	TGG	ATG	TAA	TAA
GAGA-0082.Scaffold4.12809954-12810948	GAGA-0082	Pristomyrmex punctatus	Myrmicinae	RNA polymerase sigma factor RpoD (Sigma-70)	Wolbachia	Rickettsiales	Alphaproteobacteria	Scaffold4	12809954-12810948	Scaffold4:12809954-12810948	12809954	12810948	994	23	22	22	1	12810215	12810215	12810523	12810523	308	308	0	0	A0A060PZL0	79.400000000000006	79.400000000000006	12.8	12.8	6.9999999999999993E-24	6.9999999999999993E-24	ATG	ATG	TAA	TAA
GAGA-0085.Scaffold5.1024757-1024905	GAGA-0085	Tetramorium caespitum	Myrmicinae	hypothetical protein	Wolbachia	Rickettsiales	Alphaproteobacteria	Scaffold5	1024757-1024905	Scaffold5:1024757-1024905	1024757	1024905	148	85	85	85	1	1024806	1024806	1024905	1024905	NA	NA	NA	NA	NA	NA	NA	NA	NA	NA	NA	TGA	NA	TAA	NA
GAGA-0087.Scaffold1.10059409-10062223	GAGA-0087	Myrmica scabrinodis	Myrmicinae	Ankyrin repeat protein	Wolbachia	Rickettsiales	Alphaproteobacteria	Scaffold1	10059409-10062223	Scaffold1:10059409-10062223	10059409	10062223	2814	49	42	36	1	10059409	10059404	10062223	10062235	2814	2831	621	621	E9P653	99.3	99.6	88.4	96.4	NA	NA	TAC	ATG	GAA	TGA
GAGA-0087.Scaffold1.10066041-10068042	GAGA-0087	Myrmica scabrinodis	Myrmicinae	Ankyrin repeat protein	Wolbachia	Rickettsiales	Alphaproteobacteria	Scaffold1	10066041-10068042	Scaffold1:10066041-10068042	10066041	10068042	2001	23	22	20	1	10066041	10065665	10068042	10068055	2001	2390	421	474	E9P653	100	99.1	77.400000000000006	90.8	NA	NA	CTA	ATG	AGC	TAA
GAGA-0087.Scaffold1.10098587-10101429	GAGA-0087	Myrmica scabrinodis	Myrmicinae	Ankyrin repeat protein	Wolbachia	Rickettsiales	Alphaproteobacteria	Scaffold1	10098587-10101429	Scaffold1:10098587-10101429	10098587	10101429	2842	9	14	8	1	10098587	10098576	10101429	10101974	2842	3398	376	410	E9P653	74.400000000000006	62.4	75.3	75.400000000000006	1.6E-231	1.5000000000000001E-231	TAC	ATG	ATT	TAA
GAGA-0087.Scaffold1.10339609-10343286	GAGA-0087	Myrmica scabrinodis	Myrmicinae	Ankyrin repeat protein	Wolbachia	Rickettsiales	Alphaproteobacteria	Scaffold1	10339609-10343286	Scaffold1:10339609-10343286	10339609	10343286	3677	34	25	23	1	10339609	10339604	10343286	10343356	3677	3752	318	337	E9P653	80.599999999999994	79.2	94.6	94.9	NA	NA	TAC	ATG	AGC	TAA
GAGA-0087.Scaffold1.3575968-3579556	GAGA-0087	Myrmica scabrinodis	Myrmicinae	Ankyrin repeat protein	Wolbachia	Rickettsiales	Alphaproteobacteria	Scaffold1	3575968-3579556	Scaffold1:3575968-3579556	3575968	3579556	3588	24	25	24	1	3575988	3575988	3579556	3579560	3568	3572	52	52	E9P653	78	77.900000000000006	96.5	96.5	NA	NA	ATA	ATG	TAA	TAA
GAGA-0087.Scaffold1.5019034-5020999	GAGA-0087	Myrmica scabrinodis	Myrmicinae	Ankyrin repeat protein	Wolbachia	Rickettsiales	Alphaproteobacteria	Scaffold1	5019034-5020999	Scaffold1:5019034-5020999	5019034	5020999	1965	47	47	47	1	5019034	5018996	5020999	5021506	1965	2510	357	578	E9P653	100	97.8	73	90.5	6.9999999999999998E-241	NA	GAA	ATG	TAG	TAG
GAGA-0087.Scaffold1.6128936-6131822	GAGA-0087	Myrmica scabrinodis	Myrmicinae	Ankyrin repeat protein	Wolbachia	Rickettsiales	Alphaproteobacteria	Scaffold1	6128936-6131822	Scaffold1:6128936-6131822	6128936	6131822	2886	39	47	32	1	6128936	6128931	6131822	6131831	2886	2900	404	404	E9P653	75.7	75.400000000000006	78.2	78.2	NA	NA	TAC	ATG	GAA	TGA
GAGA-0087.Scaffold1.6149907-6153212	GAGA-0087	Myrmica scabrinodis	Myrmicinae	Ankyrin repeat protein	Wolbachia	Rickettsiales	Alphaproteobacteria	Scaffold1	6149907-6153212	Scaffold1:6149907-6153212	6149907	6153212	3305	47	51	42	1	6149907	6149869	6153212	6153216	3305	3347	178	190	E9P653	57.2	56.5	68.599999999999994	68.599999999999994	1.2E-206	1.2E-206	ATA	ATG	TAG	TAA
GAGA-0087.Scaffold1.7949710-7952322	GAGA-0087	Myrmica scabrinodis	Myrmicinae	Ankyrin repeat protein	Wolbachia	Rickettsiales	Alphaproteobacteria	Scaffold1	7949710-7952322	Scaffold1:7949710-7952322	7949710	7952322	2612	22	15	12	1	7949710	7949705	7952322	7952359	2612	2654	150	150	E9P653	100	98.9	98.1	98.5	NA	NA	TAC	ATG	AGC	TAG
GAGA-0087.Scaffold1.7969970-7972320	GAGA-0087	Myrmica scabrinodis	Myrmicinae	Ankyrin repeat protein	Wolbachia	Rickettsiales	Alphaproteobacteria	Scaffold1	7969970-7972320	Scaffold1:7969970-7972320	7969970	7972320	2350	18	23	17	1	7969970	7969931	7972320	7972330	2350	2399	99	99	E9P653	95.4	93.9	76.099999999999994	76.400000000000006	NA	NA	ATA	ATG	GTA	TAG
GAGA-0087.Scaffold1.7975130-7976999	GAGA-0087	Myrmica scabrinodis	Myrmicinae	Ankyrin repeat protein	Wolbachia	Rickettsiales	Alphaproteobacteria	Scaffold1	7975130-7976999	Scaffold1:7975130-7976999	7975130	7976999	1869	30	27	24	1	7975130	7974622	7976999	7977030	1869	2408	369	558	E9P653	100	98.9	72.900000000000006	91.2	3.5E-226	NA	AAG	ATG	AGA	TAG
GAGA-0087.Scaffold1.9286514-9287847	GAGA-0087	Myrmica scabrinodis	Myrmicinae	Ankyrin repeat protein;NA	Wolbachia	Rickettsiales	Alphaproteobacteria	Scaffold1	9286514-9287847	Scaffold1:9286514-9287847	9286514	9287847	1333	23	29	19	2	9286514;9287758	9286509;9286509	9287798;9287847	9287798;9287798	1284;89	1289;1289	96;0	96;96	E9P653;NA	89.0;NA	88.6;88.6	40.1;NA	40.1;40.1	1.1e-94;NA	1.1e-94;1.1e-94	TAC;GCT	ATG;ATG	TAG;TAA	TAG;TAG
GAGA-0087.Scaffold1.9629060-9630376	GAGA-0087	Myrmica scabrinodis	Myrmicinae	Ankyrin repeat protein	Wolbachia	Rickettsiales	Alphaproteobacteria	Scaffold1	9629060-9630376	Scaffold1:9629060-9630376	9629060	9630376	1316	39	37	31	1	9629060	9629013	9630376	9630380	1316	1367	174	174	E9P653	88.8	86.2	41.6	42	4.5E-102	2.1E-102	ATA	ATG	TAG	TGA
GAGA-0087.Scaffold1.9720890-9725103	GAGA-0087	Myrmica scabrinodis	Myrmicinae	Ankyrin repeats family protein;Ankyrin repeats family protein;Ankyrin 3 (Ankyrin repeat family protein)	Wolbachia	Rickettsiales	Alphaproteobacteria	Scaffold1	9720890-9725103	Scaffold1:9720890-9725103	9720890	9725103	4213	28	20	19	3	9720890;9724250;9722899	9719891;9724262;9722899	9721786;9725103;9724314	9721786;9725167;9724314	896;853;1415	1895;905;1415	61;58;108	85;58;108	A0A5B9JVP8;A0A5B9JVP8;Q4EBI3	99.0;95.8;86.8	58.3;91.4;86.8	83.7;78.8;72.6	39.3;79.7;72.6	NA;NA;7.5e-135	9.4e-134;NA;7.5e-135	GGT;GTG;ATG	GAG;TTG;ATG	TGA;AGC;TGA	TGA;TAG;TGA
GAGA-0087.Scaffold1.9985378-9987294	GAGA-0087	Myrmica scabrinodis	Myrmicinae	Ankyrin repeat protein	Wolbachia	Rickettsiales	Alphaproteobacteria	Scaffold1	9985378-9987294	Scaffold1:9985378-9987294	9985378	9987294	1916	39	32	31	1	9985378	9985373	9987294	9988276	1916	2903	1218	2328	E9P653	95	99	64.5	98.5	1.1E-214	NA	TAC	ATG	TAA	TAG
GAGA-0087.Scaffold1.9996278-9999194	GAGA-0087	Myrmica scabrinodis	Myrmicinae	Ankyrin repeat protein	Wolbachia	Rickettsiales	Alphaproteobacteria	Scaffold1	9996278-9999194	Scaffold1:9996278-9999194	9996278	9999194	2916	18	21	16	1	9996278	9996273	9999194	9999203	2916	2930	503	503	E9P653	100	99.7	96.3	96.4	NA	NA	TAC	ATG	GAA	TGA
GAGA-0087.Scaffold114.781467-782319	GAGA-0087	Myrmica scabrinodis	Myrmicinae	Ankyrin 3 (Ankyrin repeat family protein)	Wolbachia	Rickettsiales	Alphaproteobacteria	Scaffold114	781467-782319	Scaffold114:781467-782319	781467	782319	852	27	27	25	1	781467	781462	782319	782526	852	1064	322	332	Q4EBI3	100	96.9	45.9	55.4	2.2000000000000001E-102	3E-124	TAC	ATG	GGG	TAG
GAGA-0087.Scaffold12.5734210-5734855	GAGA-0087	Myrmica scabrinodis	Myrmicinae	Ankyrin 3 (Ankyrin repeat family protein)	Wolbachia	Rickettsiales	Alphaproteobacteria	Scaffold12	5734210-5734855	Scaffold12:5734210-5734855	5734210	5734855	645	45	44	41	1	5734210	5734205	5734855	5735686	645	1481	497	847	Q4EBI3	100	92.5	35	48.6	2.7000000000000001E-70	2.1000000000000001E-143	TAC	ATG	GGG	TGA
GAGA-0087.Scaffold128.75243-76634	GAGA-0087	Myrmica scabrinodis	Myrmicinae	Ankyrin repeat protein	Wolbachia	Rickettsiales	Alphaproteobacteria	Scaffold128	75243-76634	Scaffold128:75243-76634	75243	76634	1391	34	31	30	1	75243	75205	76634	76638	1391	1433	1367	1375	E9P653	90.5	88.5	42.2	42.5	2.2000000000000001E-107	1E-107	ATA	ATG	TAG	TAG
GAGA-0087.Scaffold15.4669630-4676000	GAGA-0087	Myrmica scabrinodis	Myrmicinae	Ankyrin repeat domain protein	Wolbachia	Rickettsiales	Alphaproteobacteria	Scaffold15	4669630-4676000	Scaffold15:4669630-4676000	4669630	4676000	6370	26	39	21	1	4669937	4669937	4676000	4676833	6063	6896	4938	7296	C0R3E9	99.9	99.7	82.9	94.1	NA	NA	GGA	TTG	TAA	TAA
GAGA-0087.Scaffold18.2796209-2799547	GAGA-0087	Myrmica scabrinodis	Myrmicinae	Ankyrin repeat protein;Ankyrin 3 (Ankyrin repeat family protein)	Wolbachia	Rickettsiales	Alphaproteobacteria	Scaffold18	2796209-2799547	Scaffold18:2796209-2799547	2796209	2799547	3338	33	31	26	2	2796518;2798487	2796518;2798487	2797183;2799547	2797183;2799551	665;1060	665;1064	41;46	41;46	E9P653;Q4EBI3	73.3;97.2	73.3;96.9	16.1;55.3	16.1;55.4	2.9e-38;7.4e-123	2.9e-38;5.6e-123	ATG;ATA	ATG;ATG	TGA;TAG	TGA;TAG
GAGA-0087.Scaffold18.3183256-3183459	GAGA-0087	Myrmica scabrinodis	Myrmicinae	Ankyrin repeat protein	Wolbachia	Rickettsiales	Alphaproteobacteria	Scaffold18	3183256-3183459	Scaffold18:3183256-3183459	3183256	3183459	203	20	20	11	1	3183256	3183166	3183459	3183435	203	269	0	0	E9P653	100	80.900000000000006	7.2	7.6	1.8000000000000001E-19	5.6999999999999996E-21	TTA	ATG	AAG	TAG
GAGA-0087.Scaffold195.183704-186794	GAGA-0087	Myrmica scabrinodis	Myrmicinae	Ankyrin repeat protein	Wolbachia	Rickettsiales	Alphaproteobacteria	Scaffold195	183704-186794	Scaffold195:183704-186794	183704	186794	3090	20	20	18	1	183704	183678	186794	187316	3090	3638	1545	1941	E9P653	93	79	98.1	98.1	NA	NA	ACA	ATG	CAA	TAG
GAGA-0087.Scaffold215.282597-283653	GAGA-0087	Myrmica scabrinodis	Myrmicinae	Ankyrin repeat domain protein;Uncharacterized protein;NA	Wolbachia	Rickettsiales	Alphaproteobacteria	Scaffold215	282597-283653	Scaffold215:282597-283653	282597	283653	1056	30	28	24	3	283280;282597;282955	283280;282514;282955	283653;282801;283128	284359;282801;283128	373;204;173	1079;287;173	0;48;4	0;48;4	B6Y9L2;Q73HN8;NA	84.6;89.6;NA	91.4;63.2;NA	2.0;20.7;NA	6.9;20.7;NA	3.1e-19;1.0e-19;NA	9.8e-38;1.0e-19;NA	ATA;TTA;ATG	TTG;ATG;ATG	TAA;TGA;TGA	TAA;TGA;TGA
GAGA-0087.Scaffold25.2479233-2479991	GAGA-0087	Myrmica scabrinodis	Myrmicinae	Ankyrin repeats family protein	Wolbachia	Rickettsiales	Alphaproteobacteria	Scaffold25	2479233-2479991	Scaffold25:2479233-2479991	2479233	2479991	758	10	11	10	1	2479233	2479220	2479991	2480991	758	1771	258	489	A0A5B9JVP8	100	57.9	73.400000000000006	36.6	5.4999999999999997E-80	3.8999999999999998E-126	AAC	AAG	AGA	TGA
GAGA-0087.Scaffold25.412449-415366	GAGA-0087	Myrmica scabrinodis	Myrmicinae	Ankyrin repeat protein	Wolbachia	Rickettsiales	Alphaproteobacteria	Scaffold25	412449-415366	Scaffold25:412449-415366	412449	415366	2917	28	32	27	1	412449	412459	415366	415380	2917	2921	1851	2278	E9P653	64.900000000000006	64.900000000000006	68.099999999999994	68.099999999999994	5.6000000000000001E-200	5.6999999999999995E-200	GTT	ATG	TAA	TGA
GAGA-0087.Scaffold26.262460-265727	GAGA-0087	Myrmica scabrinodis	Myrmicinae	Ankyrin repeat protein	Wolbachia	Rickettsiales	Alphaproteobacteria	Scaffold26	262460-265727	Scaffold26:262460-265727	262460	265727	3267	17	18	16	1	262460	262447	265727	265731	3267	3284	221	221	E9P653	78.599999999999994	78.2	91.4	91.4	NA	NA	ATA	ATG	AGA	TGA
GAGA-0087.Scaffold28.887364-890135	GAGA-0087	Myrmica scabrinodis	Myrmicinae	Ankyrin repeat protein	Wolbachia	Rickettsiales	Alphaproteobacteria	Scaffold28	887364-890135	Scaffold28:887364-890135	887364	890135	2771	19	20	19	1	887364	887326	890135	890139	2771	2813	2570	2580	E9P653	100	98.9	98.1	98.5	NA	NA	ATA	ATG	TAG	TAG
GAGA-0087.Scaffold31.1645852-1653131	GAGA-0087	Myrmica scabrinodis	Myrmicinae	Ankyrin repeat domain protein	Wolbachia	Rickettsiales	Alphaproteobacteria	Scaffold31	1645852-1653131	Scaffold31:1645852-1653131	1645852	1653131	7279	25	27	25	1	1646097	1646097	1653131	1653164	7034	7067	3371	3372	C0R3E9	100	99.7	94.5	94.8	NA	NA	ACT	TTG	TAA	TAA
GAGA-0087.Scaffold33.1496747-1500819	GAGA-0087	Myrmica scabrinodis	Myrmicinae	Uncharacterized protein;Ankyrin repeat domain protein	Wolbachia	Rickettsiales	Alphaproteobacteria	Scaffold33	1496747-1500819	Scaffold33:1496747-1500819	1496747	1500819	4072	13	13	12	2	1497375;1496747	1497375;1496702	1500819;1497139	1501819;1497139	3444;392	4444;437	907;124	996;135	A0A176Q8J2;C0R3E9	81.6;100.0	35.5;90.3	94.5;5.4	20.2;5.4	NA;3.5e-47	2.3e-131;3.5e-47	TAA;TTG	TAC;TTG	TAA;ATA	TAA;TAA
GAGA-0087.Scaffold383.14647-14826	GAGA-0087	Myrmica scabrinodis	Myrmicinae	hypothetical protein	Wolbachia	Rickettsiales	Alphaproteobacteria	Scaffold383	14647-14826	Scaffold383:14647-14826	14647	14826	179	18	15	12	1	14647	NA	14722	NA	75	NA	6	NA	NA	NA	NA	NA	NA	NA	NA	ACA	NA	TAG	NA
GAGA-0087.Scaffold383.15834-17719	GAGA-0087	Myrmica scabrinodis	Myrmicinae	hypothetical protein;hypothetical protein;hypothetical protein	Wolbachia	Rickettsiales	Alphaproteobacteria	Scaffold383	15834-17719	Scaffold383:15834-17719	15834	17719	1885	35	35	35	3	15834;16307;16972	15659;16307;17248	15916;16453;17121	15916;16453;17583	82;146;149	257;146;335	22;47;1	42;47;37	NA;NA;NA	NA;NA;NA	94.1;NA;78.4	NA;NA;NA	89.5;NA;28.4	NA;NA;NA	NA;NA;2.4e-40	ATG;ATG;ATG	ATG;ATG;TTG	AGG;TAG;TAG	TGA;TAG;TAG
GAGA-0087.Scaffold4.513873-516500	GAGA-0087	Myrmica scabrinodis	Myrmicinae	Uncharacterized protein	Wolbachia	Rickettsiales	Alphaproteobacteria	Scaffold4	513873-516500	Scaffold4:513873-516500	513873	516500	2627	34	32	28	1	513873	512874	516500	516857	2627	3983	68	70	A0A176Q8J2	67.599999999999994	40	63.5	22.3	3.9999999999999996E-96	4.0000000000000002E-135	AAG	TGT	GCA	TAA
GAGA-0087.Scaffold45.1616058-1619001	GAGA-0087	Myrmica scabrinodis	Myrmicinae	Ankyrin repeat protein	Wolbachia	Rickettsiales	Alphaproteobacteria	Scaffold45	1616058-1619001	Scaffold45:1616058-1619001	1616058	1619001	2943	16	14	12	1	1616058	1616045	1619001	1619005	2943	2960	959	959	E9P653	100	99.6	96.2	96.4	NA	NA	ATA	ATG	AGA	TGA
GAGA-0087.Scaffold5.10330493-10333060	GAGA-0087	Myrmica scabrinodis	Myrmicinae	Ankyrin repeat protein	Wolbachia	Rickettsiales	Alphaproteobacteria	Scaffold5	10330493-10333060	Scaffold5:10330493-10333060	10330493	10333060	2567	15	19	14	1	10330493	10330455	10333060	10333064	2567	2609	5211	5212	E9P653	100	98.8	98.1	98.5	NA	NA	ATA	ATG	TAG	TAG
GAGA-0087.Scaffold736.10416-13234	GAGA-0087	Myrmica scabrinodis	Myrmicinae	Ankyrin repeat protein	Wolbachia	Rickettsiales	Alphaproteobacteria	Scaffold736	10416-13234	Scaffold736:10416-13234	10416	13234	2818	85	90	76	1	10416	10426	13234	13248	2818	2822	102	102	E9P653	96	95.9	85.5	85.5	NA	NA	GTT	ATG	TAA	TGA
GAGA-0087.Scaffold81.1019631-1021148	GAGA-0087	Myrmica scabrinodis	Myrmicinae	Ankyrin repeat protein	Wolbachia	Rickettsiales	Alphaproteobacteria	Scaffold81	1019631-1021148	Scaffold81:1019631-1021148	1019631	1021148	1517	16	13	13	1	1019631	1019593	1021148	1021152	1517	1559	3647	3670	E9P653	91.7	89.8	50.7	51.1	2.5999999999999999E-112	1.2E-112	ATA	ATG	TAG	TAG
GAGA-0087.Scaffold89.765064-765989	GAGA-0087	Myrmica scabrinodis	Myrmicinae	Ankyrin repeats family protein	Wolbachia	Rickettsiales	Alphaproteobacteria	Scaffold89	765064-765989	Scaffold89:765064-765989	765064	765989	925	51	51	42	1	765064	765037	765989	766989	925	1952	12	78	A0A5B9JVP8	100	99.5	89.4	72	NA	3.5999999999999999E-181	TAA	GTT	TGT	TAG
GAGA-0087.Scaffold89.889268-892087	GAGA-0087	Myrmica scabrinodis	Myrmicinae	Uncharacterized protein;Transposase;Transposase;Ankyrin repeat domain protein;Ankyrin repeat domain protein	Wolbachia	Rickettsiales	Alphaproteobacteria	Scaffold89	889268-892087	Scaffold89:889268-892087	889268	892087	2819	29	28	28	5	890016;889394;889626;890356;890984	890016;889394;889496;890356;890984	890219;889651;889916;890748;892087	890219;889651;889916;890748;893087	203;257;290;392;1103	203;155;290;392;2103	9;195;16;74;199	9;90;16;74;400	A0A060Q487;A0A176Q8R4;A0A178GV80;C0R3E9;C0R3E9	98.5;88.2;68.8;97.7;53.1	98.5;100.0;NA;97.7;72.7	26.4;26.4;24.9;5.1;7.9	26.4;17.2;NA;5.1;55.2	1.1e-13;9.5e-29;1.1e-26;3.2e-48;1.4e-76	NA;6.2e-20;1.1e-13;3.2e-48;5.2e-88	ATG;TTG;ATG;TTG;AAA	ATG;ATG;NA;TTG;TGT	TGA;TAA;TAA;TAG;TAA	TGA;TAA;NA;TAG;TAA
GAGA-0087.Scaffold9.6358492-6360227	GAGA-0087	Myrmica scabrinodis	Myrmicinae	Ankyrin 3 (Ankyrin repeat family protein);Ankyrin 3 (Ankyrin repeat family protein)	Wolbachia	Rickettsiales	Alphaproteobacteria	Scaffold9	6358492-6360227	Scaffold9:6358492-6360227	6358492	6360227	1735	27	29	25	2	6358492;6359879	6358478;6359879	6359317;6360227	6359317;6360865	825;348	839;986	266;161	266;226	Q4EBI3;Q4EBI3	98.9;100.0	97.1;96.3	43.9;18.8	43.9;88.5	6.9e-82;5.4e-40	7.1e-82;NA	TAA;GTG	ATG;GTG	TAA;AGC	TAA;TGA
GAGA-0098.Scaffold13.1812535-1819990	GAGA-0098	Harpagoxenus sublaevis	Myrmicinae	Ankyrin repeat domain protein	Wolbachia	Rickettsiales	Alphaproteobacteria	Scaffold13	1812535-1819990	Scaffold13:1812535-1819990	1812535	1819990	7455	22	28	3	1	1812699	1812699	1819976	1819976	7277	7277	724	724	C0R3E9	100	100	97.9	97.9	NA	NA	ATG	ATG	TAA	TAA
GAGA-0098.Scaffold31.1152742-1153911	GAGA-0098	Harpagoxenus sublaevis	Myrmicinae	DUF1016 family protein	Wolbachia	Rickettsiales	Alphaproteobacteria	Scaffold31	1152742-1153911	Scaffold31:1152742-1153911	1152742	1153911	1169	17	25	15	1	1153305	1153305	1153911	1153928	606	623	116	117	A0A6H2NU06	98.5	96.1	36	36	2.5E-93	2.7000000000000001E-93	ATG	ATG	CAA	TAA
GAGA-0098.Scaffold75.614148-622481	GAGA-0098	Harpagoxenus sublaevis	Myrmicinae	Uncharacterized protein;NA	Wolbachia;Ehrlichia_sp.	Rickettsiales	Alphaproteobacteria	Scaffold75	614148-622481	Scaffold75:614148-622481	614148	622481	8333	16	15	5	2	614148;617777	614100;617777	616670;618184	616670;618184	2522;407	2570;407	4;0	4;0	A0A176Q8J2;NA	97.9;NA	96.0;NA	98.4;NA	98.4;NA	NA;NA	NA;NA	TCT;GTG	ATG;GTG	TAA;TAA	TAA;TAA
GAGA-0098.Scaffold8.1328058-1329239	GAGA-0098	Harpagoxenus sublaevis	Myrmicinae	D-alanine--D-alanine ligase (EC 6.3.2.4) (D-Ala-D-Ala ligase) (D-alanylalanine synthetase)	Sodalis	Enterobacterales	Gammaproteobacteria	Scaffold8	1328058-1329239	Scaffold8:1328058-1329239	1328058	1329239	1181	27	28	21	1	1328122	1328200	1329239	1329240	1117	1040	132	128	W0HVG4	98.9	100	99.2	93.2	NA	NA	ATG	TTG	CTA	TAA
GAGA-0099.Scaffold142.246089-249676	GAGA-0099	Leptothorax acervorum	Myrmicinae	Uncharacterized protein;Uncharacterized protein;DEAD/DEAH box helicase;NA	Wolbachia	Rickettsiales	Alphaproteobacteria	Scaffold142	246089-249676	Scaffold142:246089-249676	246089	249676	3587	49	40	26	4	246246;248044;249538;246089	246246;246246;246246;246246	247175;248334;249676;246177	247175;247175;247175;247175	929;290;138;88	929;929;929;929	32;14;4;0	32;32;32;32	A0A176Q8J2;A0A225X8B4;A0A7Z3DYY9;NA	97.7;55.2;100.0;NA	97.7;97.7;97.7;97.7	38.7;12.7;10.9;NA	38.7;38.7;38.7;38.7	4.6e-75;5.4e-08;5.9e-07;NA	4.6e-75;4.6e-75;4.6e-75;4.6e-75	TTG;ATG;CAA;GTA	TTG;TTG;TTG;TTG	TAA;TAG;TAA;TAG	TAA;TAA;TAA;TAA
GAGA-0099.Scaffold15.2285014-2297549	GAGA-0099	Leptothorax acervorum	Myrmicinae	Ankyrin repeat domain protein;Ankyrin repeat domain protein;NA;NA	Wolbachia	Rickettsiales	Alphaproteobacteria	Scaffold15	2285014-2297549	Scaffold15:2285014-2297549	2285014	2297549	12535	23	31	3	2	2290723;2290109;2285836;2286249	2290723;2290109;2285836;2286249	2297385;2290408;2285908;2286321	2297385;2290408;2285908;2286321	6662;299;72;72	6662;299;72;72	1859;69;0;0	1859;69;0;0	C0R3E9;C0R3E9;NA;NA	99.4;99.0;NA;NA	99.4;99.0;NA;NA	89.0;4.0;NA;NA	89.0;4.0;NA;NA	NA;6.2e-36;NA;NA	NA;6.2e-36;NA;NA	ATG;TTG;NA;NA	ATG;TTG;NA;NA	TAA;TAA;NA;NA	TAA;TAA;NA;NA
GAGA-0099.Scaffold20.2658162-2659328	GAGA-0099	Leptothorax acervorum	Myrmicinae	DUF1016 family protein	Wolbachia	Rickettsiales	Alphaproteobacteria	Scaffold20	2658162-2659328	Scaffold20:2658162-2659328	2658162	2659328	1166	26	30	22	1	2658162	2658144	2658767	2658767	605	623	365	378	A0A6H2NU06	98.5	96.1	36	36	1.1E-91	1.1E-91	ATG	ATG	TCA	TAA
GAGA-0099.Scaffold4.5620327-5620504	GAGA-0099	Leptothorax acervorum	Myrmicinae	AAA-ATPase_like domain-containing protein	Cardinium	Sphingobacteriales	Sphingobacteriia	Scaffold4	5620327-5620504	Scaffold4:5620327-5620504	5620327	5620504	177	35	37	33	1	5620327	5620285	5620504	5620542	177	257	0	0	A0A556QVC9	100	85.9	20.2	24	3.9E-22	8.3000000000000004E-25	TTA	GTG	AGT	TGA
GAGA-0099.Scaffold4.5794430-5794610	GAGA-0099	Leptothorax acervorum	Myrmicinae	AAA-ATPase_like domain-containing protein	Cardinium	Sphingobacteriales	Sphingobacteriia	Scaffold4	5794430-5794610	Scaffold4:5794430-5794610	5794430	5794610	180	35	34	34	1	5794430	NA	5794610	NA	180	NA	0	NA	A0A556QVC9	100	NA	20.5	NA	2.2999999999999998E-22	NA	TTA	NA	ATA	NA
GAGA-0103.Scaffold1038.10998-14465	GAGA-0103	Myrmecina graminicola	Myrmicinae	Transposase;NA;NA;NA	Wolbachia	Rickettsiales	Alphaproteobacteria	Scaffold1038	10998-14465	Scaffold1038:10998-14465	10998	14465	3467	47	19	0	4	11211;13090;13577;14298	11316;13090;13577;14298	11930;13410;13786;14465	11930;13410;13786;14543	719;320;209;167	614;320;209;245	0;0;0;0	0;0;0;0	A0A178GYM1;NA;NA;NA	96.7;NA;NA;NA	96.1;NA;NA;NA	75.8;NA;NA;NA	64.4;NA;NA;NA	NA;NA;NA;NA	7.3e-80;NA;NA;NA	ATG;ATG;ATG;ATG	TTG;ATG;ATG;ATG	TAA;TGA;TAA;GCA	TAA;TGA;TAA;TAG
GAGA-0103.Scaffold21.2727980-2731770	GAGA-0103	Myrmecina graminicola	Myrmicinae	Uncharacterized protein;NA;NA	Wolbachia	Rickettsiales	Alphaproteobacteria	Scaffold21	2727980-2731770	Scaffold21:2727980-2731770	2727980	2731770	3790	37	33	30	3	2730505;2727980;2730261	2730505;2730505;2730505	2731485;2728111;2730443	2731485;2731485;2731485	980;131;182	980;980;980	2519;759;514	2701;2701;2701	A0A369RI01;NA;NA	97.9;NA;NA	97.9;97.9;97.9	71.4;NA;NA	71.4;71.4;71.4	6.9e-101;NA;NA	6.9e-101;6.9e-101;6.9e-101	ATG;ACT;GTG	ATG;ATG;ATG	TAA;TGA;TGA	TAA;TAA;TAA
GAGA-0103.Scaffold3.176889-177498	GAGA-0103	Myrmecina graminicola	Myrmicinae	DUF1016 family protein	Wolbachia	Rickettsiales	Alphaproteobacteria	Scaffold3	176889-177498	Scaffold3:176889-177498	176889	177498	609	19	19	17	1	176889	176889	177498	177503	609	614	400	400	A0A6H2NU06	98	97.5	36	36	2.6E-90	2.7E-90	ATG	ATG	GAA	TGA
GAGA-0103.Scaffold3.2187494-2193081	GAGA-0103	Myrmecina graminicola	Myrmicinae	Mutator family transposase;IS4-like element ISWen1 family transposase;Transposase;Ankyrin repeat protein;NA	Wolbachia	Rickettsiales	Alphaproteobacteria	Scaffold3	2187494-2193081	Scaffold3:2187494-2193081	2187494	2193081	5587	58	19	10	5	2187964;2189148;2190064;2190513;2187657	2187964;2189148;2190064;2190513;2187657	2188269;2189306;2190315;2193029;2187779	2188269;2189306;2190315;2193029;2187779	305;158;251;2516;122	305;158;251;2516;122	6309;2281;1829;7090;2984	6309;2281;1829;7090;2984	A0A0U1D8X4;A0A7G5C9F0;D9ZZE4;E9P653;NA	56.4;86.5;83.1;99.0;NA	56.4;86.5;83.1;99.0;NA	14.1;10.2;15.6;88.1;NA	14.1;10.2;15.6;88.1;NA	2.4e-19;6.2e-12;4.9e-25;NA;NA	2.4e-19;6.2e-12;4.9e-25;NA;NA	ATG;ATG;TTG;ATG;ATG	ATG;ATG;TTG;ATG;ATG	TAG;TAG;TGA;TAA;TAA	TAG;TAG;TGA;TAA;TAA
GAGA-0103.Scaffold3.3258538-3265007	GAGA-0103	Myrmecina graminicola	Myrmicinae	Mutator family transposase;Mutator family transposase;Ankyrin repeat protein	Wolbachia	Rickettsiales	Alphaproteobacteria	Scaffold3	3258538-3265007	Scaffold3:3258538-3265007	3258538	3265007	6469	36	27	24	3	3259170;3258712;3260700	3259170;3258712;3260700	3259634;3258891;3265007	3259634;3258891;3265439	464;179;4307	464;179;4739	2134;692;1200	2134;692;1352	A0A369RJS9;A0A6M5E1I7;E9P653	81.8;79.7;67.2	81.8;79.7;61.1	46.3;11.4;98.8	46.3;11.4;98.8	1.3e-57;5.9e-18;1.5e-297	1.3e-57;5.9e-18;1.7e-297	ATG;ATG;CCA	ATG;ATG;ATG	TGA;TGA;TAA	TGA;TGA;TAA
GAGA-0103.Scaffold5.80024-82112	GAGA-0103	Myrmecina graminicola	Myrmicinae	Alginate biosynthesis protein AlgA;Uncharacterized protein;Uncharacterized protein;NA	Wolbachia	Rickettsiales	Alphaproteobacteria	Scaffold5	80024-82112	Scaffold5:80024-82112	80024	82112	2088	25	39	22	4	80024;81187;80622;82050	80013;81187;80622;NA	80420;81990;81155;82112	80420;81990;81155;NA	396;803;533;62	407;803;533;NA	379;349;241;32	405;349;241;NA	A0A369RLE9;M9WNG4;M9WNG4;NA	97.7;98.9;96.0;NA	95.6;98.9;96.0;NA	29.8;53.9;34.7;NA	29.8;53.9;34.7;NA	1.5e-58;1.2e-131;1.9e-85;NA	1.5e-58;1.2e-131;1.9e-85;NA	ATG;GTG;ATG;ATG	ATG;GTG;ATG;NA	GTG;TAG;TAA;GAA	TGA;TAG;TAA;NA
GAGA-0103.Scaffold7.2554119-2554492	GAGA-0103	Myrmecina graminicola	Myrmicinae	Ankyrin repeat domain protein	Wolbachia	Rickettsiales	Alphaproteobacteria	Scaffold7	2554119-2554492	Scaffold7:2554119-2554492	2554119	2554492	373				1	2554119	2553120	2554492	2554660	373	1540	38	205	M9WQI6	99.2	40.5	5.0999999999999996	34.9	5.6000000000000002E-37	8.4999999999999996E-42	GAA	TTG	TGA	CTT
GAGA-0103.Scaffold72.419973-420980	GAGA-0103	Myrmecina graminicola	Myrmicinae	Helix-turn-helix transcriptional regulator;Helix-turn-helix transcriptional regulator	Wolbachia	Rickettsiales	Alphaproteobacteria	Scaffold72	419973-420980	Scaffold72:419973-420980	419973	420980	1007	33	33	29	2	420070;420410	420070;420410	420237;420727	420237;420727	167;317	167;317	6;14	6;14	A0A4Y6URN4;A0A4Y6URN4	81.8;97.1	81.8;97.1	13.8;31.3	13.8;31.3	5.7e-10;3.4e-31	5.7e-10;3.4e-31	ATG;ATG	ATG;ATG	TAA;TAA	TAA;TAA
GAGA-0103.Scaffold84.12711-13569	GAGA-0103	Myrmecina graminicola	Myrmicinae	Transposase;NA	Wolbachia	Rickettsiales	Alphaproteobacteria	Scaffold84	12711-13569	Scaffold84:12711-13569	12711	13569	858	34	37	33	2	12721;13508	12721;12721	13407;13569	13302;13302	686;61	581;581	2;0	2;2	A0A178GYM1;NA	95.6;NA	100.0;100.0	78.5;NA	63.1;63.1	NA;NA	8.1e-88;8.1e-88	ATG;ATG	TTG;TTG	TAA;AGG	TAA;TAA
GAGA-0103.Scaffold88.562040-562649	GAGA-0103	Myrmecina graminicola	Myrmicinae	Transposase;Uncharacterized protein	Wolbachia	Rickettsiales	Alphaproteobacteria	Scaffold88	562040-562649	Scaffold88:562040-562649	562040	562649	609	56	52	48	2	562040;562201	562034;562201	562231;562649	562231;562602	191;448	197;401	1;0	1;0	A0A178GWB3;Q73I80	98.4;67.6	96.9;63.9	20.9;33.0	20.9;28.1	4.3e-21;1.0e-43	4.3e-21;8.8e-35	TTG;ATG	TTG;ATG	AAA;TAA	TAA;TAA
GAGA-0114.Scaffold14.427045-427585	GAGA-0114	Manica rubida	Myrmicinae	Protein ApaG	Wolbachia	Rickettsiales	Alphaproteobacteria	Scaffold14	427045-427585	Scaffold14:427045-427585	427045	427585	540	27	27	27	1	427083	427083	427301	427301	218	218	0	0	A0A060Q4P0	98.6	98.6	53	53	1.5999999999999999E-28	1.5999999999999999E-28	ATG	ATG	TAG	TAG
GAGA-0114.Scaffold14.445809-447697	GAGA-0114	Manica rubida	Myrmicinae	N5-carboxyaminoimidazole ribonucleotide synthase (N5-CAIR synthase) (EC 6.3.4.18) (5-(carboxyamino)imidazole ribonucleotide synthetase);N5-carboxyaminoimidazole ribonucleotide synthase (N5-CAIR synthase) (EC 6.3.4.18) (5-(carboxyamino)imidazole ribonucleotide synthetase);NA	Wolbachia	Rickettsiales	Alphaproteobacteria	Scaffold14	445809-447697	Scaffold14:445809-447697	445809	447697	1888	24	22	19	3	446246;446871;445809	446246;446871;NA	446710;447050;446080	446710;447050;NA	464;179;271	464;179;NA	0;0;0	0;NA;0	A0A060Q4D5;M9WR90;NA	89.0;94.9;NA	89.0;94.9;NA	38.4;15.6;NA	38.4;15.6;NA	7.6e-55;6.9e-19;NA	7.6e-55;6.9e-19;NA	ATG;ATG;ATG	ATG;ATG;NA	TAG;TAG;TTA	TAG;TAG;NA
GAGA-0114.Scaffold15.8935522-8940716	GAGA-0114	Manica rubida	Myrmicinae	Uncharacterized protein;Uncharacterized protein;Ankyrin motif protein;Ankyrin motif protein;NA;NA	Wolbachia	Rickettsiales	Alphaproteobacteria	Scaffold15	8935522-8940716	Scaffold15:8935522-8940716	8935522	8940716	5194	39	46	24	6	8938304;8939088;8936789;8937112;8936009;8937708	8938304;8939088;8936789;8937112;8936009;8937708	8939053;8940716;8937115;8937420;8936272;8938097	8939053;8940728;8937115;8937420;8936272;8938097	749;1628;326;308;263;389	749;1640;326;308;263;389	4493;15394;264;4207;231;4792	4493;15518;264;4207;231;4792	A0A176Q8J2;A0A176Q8J2;B9A8X1;B9A8X1;NA;NA	98.8;99.6;85.2;81.4;NA;NA	98.8;99.6;85.2;81.4;NA;NA	32.2;62.2;22.8;24.2;NA;NA	32.2;62.7;22.8;24.2;NA;NA	1.3e-57;5.5e-265;1.3e-17;3.1e-11;NA;NA	1.3e-57;5.0e-266;1.3e-17;3.1e-11;NA;NA	ATG;CAA;GTG;TTG;ATG;ATG	ATG;ATG;GTG;TTG;ATG;ATG	TAA;TAA;TAA;TGA;TAG;TAA	TAA;TAA;TAA;TGA;TAG;TAA
GAGA-0114.Scaffold3.14395015-14396000	GAGA-0114	Manica rubida	Myrmicinae	Rpn family recombination-promoting nuclease/putative transposase;NA	Wolbachia	Rickettsiales	Alphaproteobacteria	Scaffold3	14395015-14396000	Scaffold3:14395015-14396000	14395015	14396000	985	28	25	25	2	14395441;14395176	14395441;14395031	14395620;14395295	14395620;14395231	179;119	179;200	34;278	34;417	A0A7G5CAR8;NA	89.8;NA	89.8;NA	17.8;NA	17.8;NA	4.2e-16;NA	4.2e-16;NA	ATG;ATG	ATG;GTG	TAG;TGA	TAG;TGA
GAGA-0114.Scaffold3.14409573-14414705	GAGA-0114	Manica rubida	Myrmicinae	Ankyrin repeat domain protein;Ankyrin repeat domain protein	Wolbachia	Rickettsiales	Alphaproteobacteria	Scaffold3	14409573-14414705	Scaffold3:14409573-14414705	14409573	14414705	5132	27	45	18	2	14414421;14409573	14414421;14408574	14414705;14414373	14414699;14414373	284;4800	278;5799	414;3529	412;4124	B6Y9L2;B6Y9L2	96.8;67.6	98.9;73.2	1.9;22.6	1.9;30.0	1.9e-21;3.4e-293	1.9e-21;0.0e+00	GGG;ATG	ATG;ATG	TGA;AAT	TGA;AAG
GAGA-0177.Scaffold10.12034628-12035035	GAGA-0177	Lasius niger	Formicinae	Ribonuclease 3 (EC 3.1.26.3) (Ribonuclease III) (RNase III)	Wolbachia	Rickettsiales	Alphaproteobacteria	Scaffold10	12034628-12035035	Scaffold10:12034628-12035035	12034628	12035035	407	51	51	51	1	12034628	12034444	12035035	12035148	407	704	21	22	A0A218KR71	100	98.7	57.8	95.8	4.9999999999999999E-46	NA	TCA	ATG	ACC	TAA
GAGA-0177.Scaffold2.1564354-1604273	GAGA-0177	Lasius niger	Formicinae	Integrase core domain protein;Uncharacterized protein (Fragment);Reverse transcriptase domain-containing protein;Ankyrin repeats family protein;Ankyrin 3 (Ankyrin repeat family protein);NA;NA;NA;NA;NA;NA;NA;NA;NA;NA;NA;NA;NA	Wolbachia	Rickettsiales	Alphaproteobacteria	Scaffold2	1564354-1604273	Scaffold2:1564354-1604273	1564354	1604273	39919				18	1574179;1600428;1573153;1564480;1564693;1583478;1586093;1589942;1591354;1592163;1593075;1593682;1566977;1569570;1571618;1572110;1595427;1575106	1574179;1600428;1573153;1564480;1564693;1583478;1586093;1589942;1591354;1592163;1593075;1593682;1566977;1569570;1571618;1572110;1595427;1575106	1574655;1604228;1573914;1564647;1565733;1583756;1586335;1590364;1591629;1592576;1593605;1593834;1567129;1569833;1572076;1572619;1595555;1575429	1574655;1604228;1573914;1564647;1565733;1583756;1586335;1590364;1591629;1592576;1593605;1593834;1567129;1569833;1572076;1572619;1595555;1575429	476;3800;761;167;1040;278;242;422;275;413;530;152;152;263;458;509;128;323	476;3800;761;167;1040;278;242;422;275;413;530;152;152;263;458;509;128;323	0;20987;0;1;87;1526;466;4375;4060;8419;6325;2939;2;0;2;0;2349;0	0;20987;0;1;87;1526;466;4375;4060;8419;6325;2939;2;0;2;0;2349;0	A0A1G4M4G7;A0A1Q3WAM0;A0A2W0BRI8;A0A5B9JVP8;Q4EBI3;NA;NA;NA;NA;NA;NA;NA;NA;NA;NA;NA;NA;NA	98.1;82.6;92.5;94.5;88.2;NA;NA;NA;NA;NA;NA;NA;NA;NA;NA;NA;NA;NA	98.1;82.6;92.5;94.5;88.2;NA;NA;NA;NA;NA;NA;NA;NA;NA;NA;NA;NA;NA	32.4;75.9;54.2;14.9;43.9;NA;NA;NA;NA;NA;NA;NA;NA;NA;NA;NA;NA;NA	32.4;75.9;54.2;14.9;43.9;NA;NA;NA;NA;NA;NA;NA;NA;NA;NA;NA;NA;NA	1.9e-13;NA;1.2e-63;2.0e-10;2.5e-83;NA;NA;NA;NA;NA;NA;NA;NA;NA;NA;NA;NA;NA	1.9e-13;NA;1.2e-63;2.0e-10;2.5e-83;NA;NA;NA;NA;NA;NA;NA;NA;NA;NA;NA;NA;NA	ATG;ATG;ATG;ATG;ATG;ATG;ATG;ATG;GTG;ATG;ATG;TTG;ATG;ATG;ATG;ATG;ATG;ATG	ATG;ATG;ATG;ATG;ATG;ATG;ATG;ATG;GTG;ATG;ATG;TTG;ATG;ATG;ATG;ATG;ATG;ATG	TAA;TAA;TAG;TAG;TAA;TAG;TGA;TAG;TAA;TAA;TAA;TGA;TGA;TAG;TAA;TGA;TAA;TAG	TAA;TAA;TAG;TAG;TAA;TAG;TGA;TAG;TAA;TAA;TAA;TGA;TGA;TAG;TAA;TGA;TAA;TAG
GAGA-0177.Scaffold2.2080594-2083787	GAGA-0177	Lasius niger	Formicinae	Uncharacterized protein (Fragment)	Wolbachia	Rickettsiales	Alphaproteobacteria	Scaffold2	2080594-2083787	Scaffold2:2080594-2083787	2080594	2083787	3193	74	55	42	1	2080594	2080143	2083787	2083793	3193	3650	5280	5802	A0A1Q3WAM0	76	85.4	84	79.2	NA	NA	AAA	ATG	GTA	TAA
GAGA-0177.Scaffold2.2477710-2478698	GAGA-0177	Lasius niger	Formicinae	Ankyrin repeats family protein	Wolbachia	Rickettsiales	Alphaproteobacteria	Scaffold2	2477710-2478698	Scaffold2:2477710-2478698	2477710	2478698	988	77	85	77	1	2477710	2477703	2478698	2479319	988	1616	8786	12072	A0A5B9JVP8	99.7	70.599999999999994	93.7	60	NA	2.5999999999999999E-105	GAA	ATG	GGT	TAA
GAGA-0177.Scaffold2.2488980-2492152	GAGA-0177	Lasius niger	Formicinae	Ankyrin repeat protein	Wolbachia	Rickettsiales	Alphaproteobacteria	Scaffold2	2488980-2492152	Scaffold2:2488980-2492152	2488980	2492152	3172	65	44	40	1	2488980	2488973	2492107	2492107	3127	3134	8614	8627	E9P653	92.6	92.6	97.7	97.9	NA	NA	ATG	ATG	GGT	TAA
GAGA-0177.Scaffold3.15864830-15865044	GAGA-0177	Lasius niger	Formicinae	hypothetical protein	Wolbachia	Rickettsiales	Alphaproteobacteria	Scaffold3	15864830-15865044	Scaffold3:15864830-15865044	15864830	15865044	214	14	14	14	1	15864830	15864759	15865044	15865046	214	287	0	0	NA	NA	NA	NA	NA	NA	NA	TAA	ATG	TAT	TAA
GAGA-0177.Scaffold6.6036355-6039460	GAGA-0177	Lasius niger	Formicinae	Ankyrin repeat protein	Wolbachia	Rickettsiales	Alphaproteobacteria	Scaffold6	6036355-6039460	Scaffold6:6036355-6039460	6036355	6039460	3105	57	74	51	1	6036355	6036348	6039416	6039416	3061	3068	685	685	E9P653	70.400000000000006	70.3	69.3	69.3	3.4999999999999999E-208	3.4999999999999999E-208	ATG	ATG	GGT	TAA
GAGA-0177.Scaffold6.6052853-6055928	GAGA-0177	Lasius niger	Formicinae	Ankyrin repeat protein	Wolbachia	Rickettsiales	Alphaproteobacteria	Scaffold6	6052853-6055928	Scaffold6:6052853-6055928	6052853	6055928	3075	54	77	48	1	6052853	6052282	6055884	6055884	3031	3602	13840	19211	E9P653	82.1	69.099999999999994	81	81	NA	5.3000000000000001E-195	ATG	ATG	TAA	TAA
GAGA-0177.Scaffold6.6111929-6114369	GAGA-0177	Lasius niger	Formicinae	Ankyrin repeat protein	Wolbachia	Rickettsiales	Alphaproteobacteria	Scaffold6	6111929-6114369	Scaffold6:6111929-6114369	6111929	6114369	2440	20	26	7	1	6111929	6111890	6114369	6115243	2440	3353	12771	15447	E9P653	72.599999999999994	78.400000000000006	57.3	94.5	1.1E-185	NA	AAA	ATG	CCT	TAA
GAGA-0177.Scaffold9.3585016-3585344	GAGA-0177	Lasius niger	Formicinae	Ankyrin 3 (Ankyrin repeat family protein)	Wolbachia	Rickettsiales	Alphaproteobacteria	Scaffold9	3585016-3585344	Scaffold9:3585016-3585344	3585016	3585344	328	50	49	49	1	3585016	3584984	3585344	3585610	328	626	0	0	Q4EBI3	98.2	58.7	17.3	19.8	4.6999999999999996E-28	3.3000000000000003E-30	AAT	TTG	TAG	TAA
GAGA-0187.Scaffold1.28857869-28858869	GAGA-0187	Plagiolepsis pygmaea	Formicinae	Uncharacterized protein;Uncharacterized protein;NA;NA	Wolbachia	Rickettsiales	Alphaproteobacteria	Scaffold1	28857869-28858869	Scaffold1:28857869-28858869	28857869	28858869	1000	24	24	24	4	28858630;28858170;28857869;28858049	28858629;28858169;28857657;28858048	28858869;28858457;28858023;28858198	28858844;28858456;28858022;28858197	239;287;154;149	215;287;365;149	187;268;64;44	187;266;160;44	A0A4Y6UQ05;A0A6I5SZW3;NA;NA	86.1;90.5;NA;NA	95.8;90.5;74.4;NA	13.7;19.2;NA;NA	13.7;19.2;18.7;NA	1.8e-14;1.2e-18;NA;NA	1.8e-14;1.2e-18;9.1e-08;NA	TTA;ATG;TTG;ATG	ATG;ATG;TTG;ATG	TGA;TAA;GAA;TGA	TGA;TAA;TAA;TGA
GAGA-0187.Scaffold2.22468242-22468636	GAGA-0187	Plagiolepsis pygmaea	Formicinae	hypothetical protein	Leclercia	Enterobacterales	Gammaproteobacteria	Scaffold2	22468242-22468636	Scaffold2:22468242-22468636	22468242	22468636	394	18	19	18	0	NA	22468284	NA	22468439	NA	155	NA	288	NA	NA	NA	NA	NA	NA	NA	NA	GTG	NA	TAA
GAGA-0187.Scaffold7.21659050-21659360	GAGA-0187	Plagiolepsis pygmaea	Formicinae	hypothetical protein	Sodalis	Enterobacterales	Gammaproteobacteria	Scaffold7	21659050-21659360	Scaffold7:21659050-21659360	21659050	21659360	310	8	10	8	1	21659295	21658757	21659360	21659095	65	338	0	2	NA	NA	NA	NA	NA	NA	NA	TAT	TTG	TAA	TAA
GAGA-0200.Scaffold111.362774-364682	GAGA-0200	Camponotus japonicus	Formicinae	N-acetylmuramic acid 6-phosphate etherase (MurNAc-6-P etherase) (EC 4.2.1.126) (N-acetylmuramic acid 6-phosphate hydrolase) (N-acetylmuramic acid 6-phosphate lyase)	Spiroplasma	Entoplasmatales	Mollicutes	Scaffold111	362774-364682	Scaffold111:362774-364682	362774	364682	1908	64	62	0	1	363210	363210	364118	364118	908	908	11895	11895	A0A0H3XH70	98.7	98.7	99	99	NA	NA	ATG	ATG	TAA	TAA
GAGA-0200.Scaffold229.139238-141467	GAGA-0200	Camponotus japonicus	Formicinae	NADH-quinone oxidoreductase subunit B (EC 7.1.1.-) (NADH dehydrogenase I subunit B) (NDH-1 subunit B);NADH-quinone oxidoreductase subunit C/D (EC 7.1.1.-) (NADH dehydrogenase I subunit C/D) (NDH-1 subunit C/D);NADH dehydrogenase I subunit E (NADH-quinone oxidoreductase subunit E) (NDH-1 subunit E)	Blochmannia	Enterobacterales	Gammaproteobacteria	Scaffold229	139238-141467	Scaffold229:139238-141467	139238	141467	2229	46	39	29	3	139238;139478;141279	139254;139478;141279	139442;141265;141467	139442;141265;141503	204;1787;188	188;1787;224	4;32;4	4;32;4	Q492H7;Q492H8;Q492H9	98.5;100.0;100.0	98.4;100.0;86.5	28.0;100.0;36.4	25.8;100.0;37.0	1.1e-24;NA;1.6e-23	3.9e-22;NA;9.2e-24	GTA;TTG;ATG	TTG;TTG;ATG	TGA;TAA;ATG	TGA;TAA;TGA
GAGA-0200.Scaffold27.1009029-1849104	GAGA-0200	Camponotus japonicus	Formicinae		Blochmannia	Enterobacterales	Gammaproteobacteria	Scaffold27	1009029-1849104	Scaffold27:1009029-1849104	1009029	1849104	840075	100	102	100	NA	NA	NA	NA	NA	NA	NA	NA	NA	NA	NA	NA	NA	NA	NA	NA	NA	NA	NA	NA
GAGA-0200.Scaffold98.508458-508707	GAGA-0200	Camponotus japonicus	Formicinae	Phosphate transporter	Blochmannia	Enterobacterales	Gammaproteobacteria	Scaffold98	508458-508707	Scaffold98:508458-508707	508458	508707	249	56	65	45	1	508458	508652	508707	508801	249	149	0	0	Q494A8	80.7	NA	12.4	NA	8.1000000000000005E-20	NA	CGT	TTG	AAT	TAA
GAGA-0221.Scaffold11.416033-416312	GAGA-0221	Camponotus fellah	Formicinae	Bifunctional_protein_HldE;Bifunctional_protein_HldE	Blochmannia	Enterobacterales	Gammaproteobacteria	Scaffold11	416033-416312	Scaffold11:416033-416312	416033	416312	279	33	33	33	2	416033;416231	NA;NA	416121;416312	NA;NA	88;81	NA;NA	13;3	NA;NA	NA;NA	NA;NA	NA;NA	NA;NA	NA;NA	NA;NA	NA;NA	AAT;ATG	NA;NA	TAA;CAT	NA;NA
GAGA-0221.Scaffold3.8820002-8820310	GAGA-0221	Camponotus fellah	Formicinae	N-acetylmuramic acid 6-phosphate etherase (MurNAc-6-P etherase) (EC 4.2.1.126) (N-acetylmuramic acid 6-phosphate hydrolase) (N-acetylmuramic acid 6-phosphate lyase);NA	Mycoplasma	Mycoplasmatales	Mollicutes	Scaffold3	8820002-8820310	Scaffold3:8820002-8820310	8820002	8820310	308	23	23	23	2	8820002;8820246	8819326;8819326	8820234;8820310	8820234;8820234	232;64	908;908	2715;42	5603;5603	A0A0H3XH70;NA	97.4;NA	98.7;98.7	24.9;NA	99.0;99.0	4.8e-25;NA	NA;NA	ATG;ATA	ATG;ATG	AGG;TAG	TAA;TAA
GAGA-0222.Scaffold130.329306-329454	GAGA-0222	Temnothorax rugatulus	Myrmicinae	Uncharacterized protein	Spiroplasma	Entoplasmatales	Mollicutes	Scaffold130	329306-329454	Scaffold130:329306-329454	329306	329454	148	46	48	46	1	329354	NA	329454	NA	100	NA	27	NA	A0A2P6F8F6	100	NA	39.799999999999997	NA	4.7E-7	NA	ATG	NA	AGA	NA
GAGA-0222.Scaffold178.255521-255830	GAGA-0222	Temnothorax rugatulus	Myrmicinae	Uncharacterized protein in vnfD 5'region	Cardinium	Sphingobacteriales	Sphingobacteriia	Scaffold178	255521-255830	Scaffold178:255521-255830	255521	255830	309	10	9	7	1	255521	255477	255737	255737	216	260	0	0	K0PA83	100	93	17.600000000000001	19.7	3.4000000000000001E-26	1.2E-26	CAG	ATG	TAA	TAA
GAGA-0222.Scaffold242.22309-25225	GAGA-0222	Temnothorax rugatulus	Myrmicinae	Ankyrin repeat protein	Wolbachia	Rickettsiales	Alphaproteobacteria	Scaffold242	22309-25225	Scaffold242:22309-25225	22309	25225	2916	28	35	21	1	22309	22309	25149	25149	2840	2840	17917	17917	E9P653	100	100	100	100	NA	NA	ATG	ATG	TAA	TAA
GAGA-0222.Scaffold262.146557-148926	GAGA-0222	Temnothorax rugatulus	Myrmicinae	Ankyrin repeat domain protein	Wolbachia	Rickettsiales	Alphaproteobacteria	Scaffold262	146557-148926	Scaffold262:146557-148926	146557	148926	2369	34	39	29	1	146557	145726	148926	148962	2369	3236	4	8	C0R3E9	100	98.6	33	43.9	6.5000000000000003E-284	0	CAT	GTG	GAC	TAG
GAGA-0222.Scaffold30.2043794-2050556	GAGA-0222	Temnothorax rugatulus	Myrmicinae	OTU domain-containing protein;Tetratricopeptide repeat protein;Ankyrin repeat domain protein;Ankyrin repeat domain protein;Uncharacterized protein	Wolbachia	Rickettsiales	Alphaproteobacteria	Scaffold30	2043794-2050556	Scaffold30:2043794-2050556	2043794	2050556	6762	15	14	14	5	2047334;2045130;2050239;2044834;2043825	2047334;2045130;2050239;2044834;2043825	2050258;2047244;2050526;2045106;2044013	2050258;2047244;2050526;2045106;2044013	2924;2114;287;272;188	2924;2114;287;272;188	335;104;16;8;145	335;104;16;8;145	A0A218KPU2;A0A4Y6UMV0;C0R3D8;M9WQI6;Q73I81	98.2;82.5;89.5;66.7;96.8	98.2;82.5;89.5;66.7;96.8	27.0;28.2;9.2;2.6;19.3	27.0;28.2;9.2;2.6;19.3	6.3e-159;4.6e-68;7.7e-31;4.5e-18;4.0e-11	6.3e-159;4.6e-68;7.7e-31;4.5e-18;4.0e-11	ATG;GTG;TTG;TTG;ATG	ATG;GTG;TTG;TTG;ATG	TAG;TAA;TGA;TAA;TAA	TAG;TAA;TGA;TAA;TAA
GAGA-0222.Scaffold356.12454-24883	GAGA-0222	Temnothorax rugatulus	Myrmicinae	Uncharacterized protein;Tetratricopeptide repeat protein;Ankyrin repeat domain protein;Ankyrin repeat domain protein;NA;NA	Wolbachia	Rickettsiales	Alphaproteobacteria	Scaffold356	12454-24883	Scaffold356:12454-24883	12454	24883	12429	18	44	1	6	20719;23602;12505;19124;23137;20405	20719;23602;12505;19124;23137;20405	20931;23931;19143;19732;23334;20713	20931;23931;19143;19732;23334;20713	212;329;6638;608;197;308	212;329;6638;608;197;308	0;3;57;4;1;0	0;3;57;4;1;0	A0A1A9VJP0;A0A4Y6UMV0;C0R3E9;C0R3E9;NA;NA	100.0;99.1;99.9;96.0;NA;NA	100.0;99.1;99.9;96.0;NA;NA	5.1;5.4;89.9;7.9;NA;NA	5.1;5.4;89.9;7.9;NA;NA	3.1e-11;3.8e-25;NA;1.6e-76;NA;NA	3.1e-11;3.8e-25;NA;1.6e-76;NA;NA	ATG;GTG;ATG;ATG;ATG;ATG	ATG;GTG;ATG;ATG;ATG;ATG	TGA;TAA;TGA;TAA;TGA;TGA	TGA;TAA;TGA;TAA;TGA;TGA
GAGA-0222.Scaffold58.594632-608947	GAGA-0222	Temnothorax rugatulus	Myrmicinae	DNA mismatch repair protein MutL;DNA mismatch repair protein MutL;DNA mismatch repair protein (Fragment);Uncharacterized protein;DNA mismatch repair protein MutL;NA	Wolbachia	Rickettsiales	Alphaproteobacteria	Scaffold58	594632-608947	Scaffold58:594632-608947	594632	608947	14315	43	27	22	6	608336;607627;607939;594632;607166;606982	608336;607627;607939;594643;607166;606982	608947;607896;608361;606483;607459;607248	608950;607896;608361;606483;607459;607248	611;269;422;11851;293;266	614;269;422;11840;293;266	651;285;358;1727;292;250	653;285;358;1727;292;250	A0A060Q4G1;C0R515;F8T4M1;M9WRQ3;M9WZ62;NA	100.0;100.0;93.6;85.7;90.7;NA	100.0;100.0;93.6;85.7;90.7;NA	32.6;14.7;41.3;99.2;14.5;NA	32.6;14.7;41.3;99.1;14.5;NA	4.4e-93;5.8e-34;6.3e-41;NA;7.4e-37;NA	4.4e-93;5.8e-34;6.3e-41;NA;7.4e-37;NA	GTG;ATG;GTG;ATT;GTG;ATG	GTG;ATG;GTG;TTG;GTG;ATG	AGG;TAA;TGA;TAG;TAA;TAA	TAG;TAA;TGA;TAG;TAA;TAA
GAGA-0222.Scaffold62.274842-283762	GAGA-0222	Temnothorax rugatulus	Myrmicinae	Tetratricopeptide repeat protein;Uncharacterized protein GF1gp22 (Fragment);Uncharacterized protein GF1gp22 (Fragment);Ankyrin repeat domain protein;Ankyrin repeat domain protein;Ankyrin repeat domain protein;Ankyrin repeat domain protein	Wolbachia	Rickettsiales	Alphaproteobacteria	Scaffold62	274842-283762	Scaffold62:274842-283762	274842	283762	8920	23	25	23	8	279511;282979;280952;277132;280120;278696;278975	279511;282979;280952;277132;280120;278696;278975	279768;283593;281209;277428;281013;278944;279541	279768;283593;281209;277428;281013;278944;279541	257;614;257;296;893;248;566	257;614;257;296;893;248;566	0;60;2;0;2;0;0	0;60;2;0;2;0;0	A0A4Y6UMV0;B9A8X2;B9A8X2;C0R3E9;C0R3E9;C0R3E9;C0R3E9	84.7;90.7;83.5;96.9;96.6;95.1;100.0	84.7;90.7;83.5;96.9;96.6;95.1;100.0	3.7;25.7;9.8;3.8;11.6;3.2;7.6	3.7;25.7;9.8;3.8;11.6;3.2;7.6	2.2e-17;3.3e-72;7.8e-23;2.7e-31;3.7e-95;4.8e-28;2.0e-69	2.2e-17;3.3e-72;7.8e-23;2.7e-31;3.7e-95;4.8e-28;2.0e-69	TTG;ATG;TTG;ATG;GTG;TTG;TTG	TTG;ATG;TTG;ATG;GTG;TTG;TTG	TAG;TAA;TAA;TAG;TAA;TAA;TGA	TAG;TAA;TAA;TAG;TAA;TAA;TGA
GAGA-0222.Scaffold8.5584886-5586057	GAGA-0222	Temnothorax rugatulus	Myrmicinae	DUF1016 family protein;NA;NA	Wolbachia	Rickettsiales	Alphaproteobacteria	Scaffold8	5584886-5586057	Scaffold8:5584886-5586057	5584886	5586057	1171	28	42	17	3	5584934;5585573;5585947	5584934;5585573;NA	5585551;5585728;5586057	5585551;5585728;NA	617;155;110	617;155;NA	3354;632;291	3354;632;NA	A0A6H2NU06;NA;NA	97.1;NA;NA	97.1;NA;NA	36.0;NA;NA	36.0;NA;NA	6.4e-92;NA;NA	6.4e-92;NA;NA	ATG;TTG;GTA	ATG;TTG;NA	TGA;TAA;TAA	TGA;TAA;NA
GAGA-0222.Scaffold85.858212-858361	GAGA-0222	Temnothorax rugatulus	Myrmicinae	hypothetical protein	Spiroplasma	Entoplasmatales	Mollicutes	Scaffold85	858212-858361	Scaffold85:858212-858361	858212	858361	149	28	34	0	1	858212	NA	858312	NA	100	NA	2	NA	NA	NA	NA	NA	NA	NA	NA	ATG	NA	AGA	NA
GAGA-0222.Scaffold92.275861-276174	GAGA-0222	Temnothorax rugatulus	Myrmicinae	Uncharacterized protein in vnfD 5'region	Cardinium	Sphingobacteriales	Sphingobacteriia	Scaffold92	275861-276174	Scaffold92:275861-276174	275861	276174	313	14	36	4	1	275861	275817	276174	276218	313	401	54	54	K0PA83	100	82.7	25.2	26.6	2.6E-39	1.2000000000000001E-39	CAG	ATG	TAA	TAA
GAGA-0222.Scaffold97.528511-528911	GAGA-0222	Temnothorax rugatulus	Myrmicinae	TDisulfide bond formation protein D	Wolbachia	Rickettsiales	Alphaproteobacteria	Scaffold97	528511-528911	Scaffold97:528511-528911	528511	528911	400	30	29	29	1	528511	528653	528802	528802	291	149	0	0	A0A369RL79	65.599999999999994	89.8	25.6	17.7	4.1000000000000001E-24	3.8999999999999998E-14	AAA	ATG	TAG	TAG
GAGA-0222.Scaffold97.590539-593737	GAGA-0222	Temnothorax rugatulus	Myrmicinae	Transposase IS116/IS110/IS902 family protein;Disulfide bond formation protein D;NA	Wolbachia	Rickettsiales	Alphaproteobacteria	Scaffold97	590539-593737	Scaffold97:590539-593737	590539	593737	3198	36	37	33	3	593023;590539;591545	593023;590475;591792	593737;590726;591682	593520;590726;591986	714;187;137	497;251;194	3;0;0	0;0;1	A0A369RIP2;A0A3B0J9W7;NA	100.0;86.9;NA	100.0;63.9;70.3	70.9;21.5;NA	49.4;21.5;22.7	4.0e-95;4.9e-17;8.3e-09	3.0e-59;4.9e-17;1.1e-13	GCG;TAA;ATG	ATG;ATG;ATG	TAA;TAG;TAA	TAA;TAG;TGA
GAGA-0223.Scaffold1.1848750-1849914	GAGA-0223	Temnothorax longispinosus	Myrmicinae	DUF1016 family protein;NA;NA	Wolbachia	Rickettsiales	Alphaproteobacteria	Scaffold1	1848750-1849914	Scaffold1:1848750-1849914	1848750	1849914	1164	35	34	34	3	1848806;1849420;1849808	1848806;1849420;NA	1849423;1849548;1849914	1849423;1849548;NA	617;128;106	617;128;NA	3111;593;219	3111;593;NA	A0A6H2NU06;NA;NA	97.1;NA;NA	97.1;NA;NA	36.0;NA;NA	36.0;NA;NA	4.4e-93;NA;NA	4.4e-93;NA;NA	ATG;GTG;TAG	ATG;GTG;NA	TGA;TGA;TAA	TGA;TGA;NA
GAGA-0223.Scaffold10.2118171-2118355	GAGA-0223	Temnothorax longispinosus	Myrmicinae	Putative AAA-ATPase	Cardinium	Sphingobacteriales	Sphingobacteriia	Scaffold10	2118171-2118355	Scaffold10:2118171-2118355	2118171	2118355	184	29	28	27	1	2118171	2118157	2118355	2118372	184	215	11	14	A0A345PN33	93.4	80.3	10.5	10.5	6.7000000000000005E-14	6.7000000000000005E-14	GAA	ATG	CTT	TAG
GAGA-0223.Scaffold120.360151-367179	GAGA-0223	Temnothorax longispinosus	Myrmicinae	Ankyrin repeat domain protein;Ankyrin repeat domain protein;Ankyrin repeat domain protein	Wolbachia	Rickettsiales	Alphaproteobacteria	Scaffold120	360151-367179	Scaffold120:360151-367179	360151	367179	7028	57	61	18	3	363308;363765;360151	363308;363765;360102	363802;367124;363311	363802;367124;363311	494;3359;3160	494;3359;3209	2;116;95	2;116;95	C0R3E9;C0R3E9;C0R3E9	93.9;99.6;99.7	93.9;99.6;98.2	6.2;41.9;42.0	6.2;41.9;42.0	7.0e-48;0.0e+00;0.0e+00	7.0e-48;0.0e+00;0.0e+00	ATG;ATG;TTG	ATG;ATG;TTG	TGA;TGA;ATT	TGA;TGA;TGA
GAGA-0223.Scaffold170.330827-333425	GAGA-0223	Temnothorax longispinosus	Myrmicinae	Uncharacterized protein;NA	Wolbachia	Rickettsiales	Alphaproteobacteria	Scaffold170	330827-333425	Scaffold170:330827-333425	330827	333425	2598	35	30	20	2	331017;330827	333005;331017	331322;331036	333214;331322	305;209	209;305	2;0	38;2	M9WXB4;NA	100.0;NA	NA;100.0	51.0;NA	NA;51.0	1.3e-46;NA	NA;1.3e-46	ATG;TCT	TTG;ATG	TAA;TAG	TAA;TAA
GAGA-0223.Scaffold205.154501-162345	GAGA-0223	Temnothorax longispinosus	Myrmicinae	Ankyrin repeat domain protein;NA	Wolbachia	Rickettsiales	Alphaproteobacteria	Scaffold205	154501-162345	Scaffold205:154501-162345	154501	162345	7844	56	54	17	2	154501;162173	154251;154251	161387;162345	161387;161387	6886;172	7136;7136	20220;1632	20583;20583	C0R3E9;NA	99.7;NA	99.7;99.7	94.3;NA	97.6;97.6	NA;NA	NA;NA	GTA;TCT	ATG;ATG	TAA;TGA	TAA;TAA
GAGA-0223.Scaffold205.168022-176617	GAGA-0223	Temnothorax longispinosus	Myrmicinae	Ankyrin repeat domain protein	Wolbachia	Rickettsiales	Alphaproteobacteria	Scaffold205	168022-176617	Scaffold205:168022-176617	168022	176617	8595	40	27	9	1	168075	168075	175682	175682	7607	7607	14979	14979	C0R3E9	99.6	99.6	97.5	97.5	NA	NA	ATG	ATG	TAA	TAA
GAGA-0223.Scaffold21.1435315-1443283	GAGA-0223	Temnothorax longispinosus	Myrmicinae	Ankyrin repeat domain protein;Ankyrin repeat domain protein;Ankyrin repeat domain protein	Wolbachia	Rickettsiales	Alphaproteobacteria	Scaffold21	1435315-1443283	Scaffold21:1435315-1443283	1435315	1443283	7968	34	31	12	3	1436524;1436897;1436281	1436524;1436897;1436281	1436778;1443229;1436439	1436778;1443229;1436439	254;6332;158	254;6332;158	98;2352;69	98;2352;69	C0R3E9;C0R3E9;C0R3E9	94.0;98.6;84.6	94.0;98.6;84.6	3.2;84.5;1.7	3.2;84.5;1.7	1.3e-22;NA;4.6e-07	1.3e-22;NA;4.6e-07	GTG;ATG;ATG	GTG;ATG;ATG	TAA;TAG;TGA	TAA;TAG;TGA
GAGA-0223.Scaffold21.1453501-1460912	GAGA-0223	Temnothorax longispinosus	Myrmicinae	Ankyrin repeat domain protein	Wolbachia	Rickettsiales	Alphaproteobacteria	Scaffold21	1453501-1460912	Scaffold21:1453501-1460912	1453501	1460912	7411	42	47	16	1	1453501	1453496	1460857	1460857	7356	7361	2946	2947	C0R3E9	100	100	98.4	98.5	NA	NA	ATG	ATG	AAC	TAA
GAGA-0223.Scaffold21.1474501-1481687	GAGA-0223	Temnothorax longispinosus	Myrmicinae	Ankyrin repeat domain protein	Wolbachia	Rickettsiales	Alphaproteobacteria	Scaffold21	1474501-1481687	Scaffold21:1474501-1481687	1474501	1481687	7186	41	46	10	1	1474501	1474427	1481687	1481704	7186	7277	7057	7142	C0R3E9	100	99.4	96.7	97.3	NA	NA	AGA	ATG	AAG	TAA
GAGA-0223.Scaffold21.1492280-1500500	GAGA-0223	Temnothorax longispinosus	Myrmicinae	Ankyrin repeat domain protein;NA	Wolbachia	Rickettsiales	Alphaproteobacteria	Scaffold21	1492280-1500500	Scaffold21:1492280-1500500	1492280	1500500	8220	64	47	11	2	1493265;1492426	1493265;1492426	1500500;1492584	1500548;1492584	7235;158	7283;158	1666;52	1676;52	C0R3E9;NA	100.0;NA	99.9;NA	97.3;NA	97.8;NA	NA;NA	NA;NA	GAA;ATG	ATG;ATG	TAA;TAA	TAA;TAA
GAGA-0223.Scaffold21.1509751-1516991	GAGA-0223	Temnothorax longispinosus	Myrmicinae	Ankyrin repeat domain protein;Ankyrin repeat domain protein;Inactivated homolog of predicted Zn-dependent protease, PmbA	Wolbachia	Rickettsiales	Alphaproteobacteria	Scaffold21	1509751-1516991	Scaffold21:1509751-1516991	1509751	1516991	7240	53	36	6	3	1511383;1511597;1509751	1511383;1511597;NA	1511610;1516991;1509908	1511610;1517991;NA	227;5394;157	227;6394;NA	30;591;68	30;655;NA	C0R3E9;C0R3E9;Q5GRT0	90.7;99.9;80.4	90.7;99.9;NA	2.7;72.0;9.2	2.7;85.5;NA	9.2e-24;0.0e+00;3.2e-08	9.2e-24;NA;NA	ATG;TAA;TTG	ATG;TTC;NA	TAA;TGA;TGA	TAA;TGA;NA
GAGA-0223.Scaffold29.1322907-1326278	GAGA-0223	Temnothorax longispinosus	Myrmicinae	Ankyrin repeat protein	Wolbachia	Rickettsiales	Alphaproteobacteria	Scaffold29	1322907-1326278	Scaffold29:1322907-1326278	1322907	1326278	3371	39	40	24	1	1322978	1322978	1325899	1325899	2921	2921	4193	4193	E9P653	97.4	97.4	99.7	99.7	NA	NA	ATG	ATG	TAG	TAG
GAGA-0223.Scaffold3.2958279-2958939	GAGA-0223	Temnothorax longispinosus	Myrmicinae	Ankyrin repeat domain protein;Ankyrin repeat domain protein	Wolbachia	Rickettsiales	Alphaproteobacteria	Scaffold3	2958279-2958939	Scaffold3:2958279-2958939	2958279	2958939	660	28	26	26	2	2958334;2958714	2958334;2958714	2958642;2958939	2958642;2958950	308;225	308;236	10;21	10;22	C0R3E9;C0R3E9	100.0;93.2	100.0;88.5	4.1;2.7	4.1;2.7	4.1e-32;2.4e-16	4.1e-32;2.5e-16	TTG;AGC	TTG;TTG	TAA;TAA	TAA;TAA
GAGA-0223.Scaffold39.1542631-1542813	GAGA-0223	Temnothorax longispinosus	Myrmicinae	Putative AAA-ATPase;Putative AAA-ATPase	Cardinium	Sphingobacteriales	Sphingobacteriia	Scaffold39	1542631-1542813	Scaffold39:1542631-1542813	1542631	1542813	182	47	52	39	1	1542631;1542631	1542813;1542634	1542756;1542756	1542935;1542756	125;125	122;122	6;6	4;6	A0A345PN33;A0A345PN33	97.6;97.6	NA;97.5	7.3;7.3	NA;7.2	1.6e-07;1.6e-07	NA;6.0e-07	AAA;AAA	TTG;ATG	TAA;TAA	TAA;TAA
GAGA-0223.Scaffold5.3716585-3716969	GAGA-0223	Temnothorax longispinosus	Myrmicinae	Uncharacterized protein;NA;NA	Wolbachia	Rickettsiales	Alphaproteobacteria	Scaffold5	3716585-3716969	Scaffold5:3716585-3716969	3716585	3716969	384	42	40	40	3	3716682;3716585;3716894	3716682;NA;3716843	3716831;3716652;3716969	3716831;NA;3716971	149;67;75	149;NA;128	95124;61128;59607	106778;NA;65437	A0A369RMJ4;NA;NA	100.0;NA;NA	100.0;NA;NA	84.2;NA;NA	84.2;NA;NA	NA;NA;NA	NA;NA;NA	ATG;TGA;ATG	ATG;NA;GTG	TAA;TGA;ATT	TAA;NA;TAA
GAGA-0223.Scaffold6.2690651-2691730	GAGA-0223	Temnothorax longispinosus	Myrmicinae	Uncharacterized protein;Uncharacterized protein	Wolbachia	Rickettsiales	Alphaproteobacteria	Scaffold6	2690651-2691730	Scaffold6:2690651-2691730	2690651	2691730	1079	41	39	32	2	2690651;2690957	2690574;2690957	2690840;2691730	2690792;2691742	189;773	218;785	13;38	17;38	A0A4S2QRJ3;M9WNG4	100.0;100.0	100.0;98.5	8.6;52.4	9.9;52.4	1.7e-14;7.4e-120	1.5e-21;3.4e-120	TTG;ATT	ATG;ATG	ATA;TAG	TAG;TAG
GAGA-0223.Scaffold71.287011-295459	GAGA-0223	Temnothorax longispinosus	Myrmicinae	Tetratricopeptide repeat protein;Tetratricopeptide repeat protein;Uncharacterized protein GF1gp22 (Fragment);Uncharacterized protein GF1gp22 (Fragment);Ankyrin repeat domain protein;Ankyrin repeat domain protein;NA	Wolbachia	Rickettsiales	Alphaproteobacteria	Scaffold71	287011-295459	Scaffold71:287011-295459	287011	295459	8448	29	39	5	7	288938;290534;287723;287011;290998;289447;294300	288938;290534;287723;286987;290998;289447;294300	289450;290968;288931;287739;294249;290556;294470	289450;290968;288931;287739;294249;290556;294470	512;434;1208;728;3251;1109;170	512;434;1208;752;3251;1109;170	0;4;2;64;148;6;14	0;4;2;64;148;6;14	A0A4Y6UMV0;A0A4Y6UMV0;B9A8X2;B9A8X2;C0R3E9;C0R3E9;NA	95.9;97.2;99.5;96.7;97.8;98.4;NA	95.9;97.2;99.5;93.6;97.8;98.4;NA	7.5;7.1;56.2;32.0;42.5;14.7;NA	7.5;7.1;56.2;32.0;42.5;14.7;NA	2.0e-39;7.3e-45;2.1e-143;1.8e-90;0.0e+00;3.1e-135;NA	2.0e-39;7.3e-45;2.1e-143;2.0e-90;0.0e+00;3.1e-135;NA	ATG;ATG;TTG;GAA;TTG;TTG;ATG	ATG;ATG;TTG;ATG;TTG;TTG;ATG	TGA;TAG;TAA;TGA;TAA;TAA;TAG	TGA;TAG;TAA;TGA;TAA;TAA;TAG
GAGA-0224.Scaffold10.2149895-2156312	GAGA-0224	Temnothorax americanus	Myrmicinae	OTU domain-containing protein;Ankyrin repeat domain protein	Wolbachia	Rickettsiales	Alphaproteobacteria	Scaffold10	2149895-2156312	Scaffold10:2149895-2156312	2149895	2156312	6417	29	33	2	2	2149895;2155406	2149854;2155406	2155169;2155678	2155169;2155678	5274;272	5315;272	604;40	612;40	A0A218KPU2;M9WQI6	83.1;93.3	82.4;93.3	41.4;3.5	41.4;3.5	4.7e-195;3.4e-26	4.7e-195;3.4e-26	ACC;TTG	ATG;TTG	TAA;TAG	TAA;TAG
GAGA-0224.Scaffold2.1433660-1443186	GAGA-0224	Temnothorax americanus	Myrmicinae	Ankyrin repeat domain protein	Wolbachia	Rickettsiales	Alphaproteobacteria	Scaffold2	1433660-1443186	Scaffold2:1433660-1443186	1433660	1443186	9526	27	26	25	1	1435849	1435849	1443132	1443132	7283	7283	1236	1236	C0R3E9	99.4	99.4	97.3	97.3	NA	NA	ATG	ATG	TAA	TAA
GAGA-0224.Scaffold2.5523877-5525052	GAGA-0224	Temnothorax americanus	Myrmicinae	DUF1016 family protein;NA;NA	Wolbachia	Rickettsiales	Alphaproteobacteria	Scaffold2	5523877-5525052	Scaffold2:5523877-5525052	5523877	5525052	1175	43	51	43	3	5524378;5524212;5523877	5524378;5524212;NA	5524995;5524433;5523995	5524995;5524433;NA	617;221;118	617;221;NA	316;107;16	316;107;NA	A0A6H2NU06;NA;NA	97.1;NA;NA	97.1;NA;NA	36.0;NA;NA	36.0;NA;NA	1.7e-92;NA;NA	1.7e-92;NA;NA	ATG;TTG;ATA	ATG;TTG;NA	TGA;TAA;TAA	TGA;TAA;NA
GAGA-0224.Scaffold24.2173785-2173936	GAGA-0224	Temnothorax americanus	Myrmicinae	hypothetical protein	Spiroplasma	Entoplasmatales	Mollicutes	Scaffold24	2173785-2173936	Scaffold24:2173785-2173936	2173785	2173936	151	24	44	16	0		NA	NA	NA	NA	NA	NA	NA	NA	NA	NA	NA	NA	NA	NA	NA	NA	NA	NA
GAGA-0224.Scaffold3.6366209-6373423	GAGA-0224	Temnothorax americanus	Myrmicinae	Ankyrin repeat domain protein;Ankyrin repeat domain protein	Wolbachia	Rickettsiales	Alphaproteobacteria	Scaffold3	6366209-6373423	Scaffold3:6366209-6373423	6366209	6373423	7214	24	24	18	2	6369079;6366296	6369079;6366296	6373423;6369139	6373440;6369139	4344;2843	4361;2843	1807;1913	1823;1913	C0R3E9;C0R3E9	99.4;98.3	99.2;98.3	59.8;37.7	59.9;37.7	0.0e+00;0.0e+00	0.0e+00;0.0e+00	AGA;ATG	ATG;ATG	TAA;TAA	TAA;TAA
GAGA-0224.Scaffold60.448384-449052	GAGA-0224	Temnothorax americanus	Myrmicinae	Uncharacterized protein;Ankyrin repeat domain protein	Wolbachia	Rickettsiales	Alphaproteobacteria	Scaffold60	448384-449052	Scaffold60:448384-449052	448384	449052	668	33	21	5	2	448549;448887	448549;448887	448704;449052	448704;449084	155;165	155;197	6;8	6;9	A0A176Q8J2;C0R3E9	100.0;88.9	100.0;73.8	5.9;2.0	5.9;2.0	5.3e-11;4.9e-09	5.3e-11;4.9e-09	TTG;TGC	TTG;ATG	TAA;TAA	TAA;TAA
GAGA-0229.Scaffold1.12144139-12144279	GAGA-0229	Cephalotes minutus	Myrmicinae	Similar to terminase large subunit of lambda [bacteriophage WO] (Fragment)	Wolbachia	Rickettsiales	Alphaproteobacteria	Scaffold1	12144139-12144279	Scaffold1:12144139-12144279	12144139	12144279	140	38	38	38	1	12144139	12144109	12144279	12144450	140	341	9	60	Q75QN0	NA	NA	NA	NA	NA	NA	GGC	ATG	TTT	TGA
GAGA-0229.Scaffold18.2465400-2465653	GAGA-0229	Cephalotes minutus	Myrmicinae	Aspartate carbamoyltransferase (EC 2.1.3.2) (Aspartate transcarbamylase) (ATCase)	Spiroplasma	Entoplasmatales	Mollicutes	Scaffold18	2465400-2465653	Scaffold18:2465400-2465653	2465400	2465653	253	18	18	18	1	2465418	NA	2465653	NA	235	NA	44	NA	A0A0H3XH93	74	NA	20.100000000000001	NA	2.4E-8	NA	CAT	NA	TAG	NA
GAGA-0229.Scaffold57.164617-165538	GAGA-0229	Cephalotes minutus	Myrmicinae	Protein-export membrane protein SecF;NA	Wolbachia	Rickettsiales	Alphaproteobacteria	Scaffold57	164617-165538	Scaffold57:164617-165538	164617	165538	921	21	20	20	2	164759;165353	164759;165353	165106;165538	165106;165583	347;185	347;230	1;0	1;0	A0A060Q4M2;NA	100.0;NA	100.0;NA	39.2;NA	39.2;NA	2.9e-49;NA	2.9e-49;NA	ATG;GTG	ATG;ATG	TGA;TAA	TGA;TAA
GAGA-0229.Scaffold57.170082-179129	GAGA-0229	Cephalotes minutus	Myrmicinae	Peptidase A2 domain-containing protein;Uncharacterized protein predicted to be involved in C-type cytochrome biogenesis;6,7-dimethyl-8-ribityllumazine synthase (DMRL synthase) (LS) (Lumazine synthase) (EC 2.5.1.78);Membrane protein insertase YidC (Foldase YidC) (Membrane integrase YidC) (Membrane protein YidC);Na+/alanine symporter;Peptidase A2 domain-containing protein;Uncharacterized protein;Me…	Wolbachia;Anaplasma	Rickettsiales	Alphaproteobacteria	Scaffold57	170082-179129	Scaffold57:170082-179129	170082	179129	9047	14	10	0	17	170092;178814;173268;170720;178037;170407;175847;170944;175096;171297;177856;173513;176689;177567;174090;174491;176319	174491;178814;171297;170407;178037;170092;175847;170720;175096;170944;177856;173268;176689;177567;173513;174090;176319	170376;179053;173513;170935;178435;170592;176317;171294;175893;171710;178008;173800;176907;177827;174353;174925;176543	174925;179053;171710;170592;178435;170376;176317;170935;175893;171294;178008;173513;176907;177827;173800;174353;176543	284;239;245;215;398;185;470;350;797;413;152;287;218;260;263;434;224	434;239;413;185;398;284;470;215;797;350;152;245;218;260;287;263;224	2;3;8;0;3;0;3;4;8;2;1;2;0;0;6;3;1	3;3;2;0;3;2;3;0;8;4;1;8;0;0;2;6;1	A0A059IVU6;A0A060PWC4;A0A060PWN1;A0A060PZB9;A0A060Q085;A0A060Q4B7;A0A178GVB8;A0A225X4T8;A0A369RLG1;A0A6H2NTV1;A0A7Y6JSZ6;A0A7Y6N9F9;M9X082;M9X082;Q5GT92;Q73I47;NA	100.0;100.0;95.1;78.9;96.2;100.0;99.4;99.1;85.7;92.7;98.0;91.6;95.8;100.0;100.0;100.0;NA	100.0;100.0;92.7;100.0;96.2;100.0;99.4;78.9;85.7;99.1;98.0;95.1;95.8;100.0;91.6;100.0;NA	55.6;48.5;55.6;9.8;27.0;35.9;18.3;20.1;31.3;32.8;14.5;54.4;15.4;19.2;100.0;73.2;NA	73.2;48.5;32.8;35.9;27.0;55.6;18.3;9.8;31.3;20.1;14.5;55.6;15.4;19.2;54.4;100.0;NA	1.8e-40;7.9e-31;8.1e-28;5.1e-22;2.6e-50;1.5e-21;1.6e-60;3.6e-52;7.8e-19;2.7e-63;9.0e-11;1.1e-29;8.4e-25;3.5e-31;NA;5.9e-71;NA	5.9e-71;7.9e-31;2.7e-63;1.5e-21;2.6e-50;1.8e-40;1.6e-60;5.1e-22;7.8e-19;3.6e-52;9.0e-11;8.1e-28;8.4e-25;3.5e-31;1.1e-29;NA;NA	TTG;ATG;ATG;ATG;ATG;ATG;ATG;ATG;GTG;TTG;ATG;ATG;ATG;ATG;ATG;ATG;ATG	ATG;ATG;TTG;ATG;ATG;TTG;ATG;ATG;GTG;ATG;ATG;ATG;ATG;ATG;ATG;ATG;ATG	TAG;TAG;TGA;TAA;TAG;TAA;TGA;TAA;TAG;TAA;TAA;TGA;TAG;TAA;TAA;TGA;TAA	TGA;TAG;TAA;TAA;TAG;TAG;TGA;TAA;TAG;TAA;TAA;TGA;TAG;TAA;TGA;TAA;TAA
GAGA-0229.Scaffold57.191552-196437	GAGA-0229	Cephalotes minutus	Myrmicinae	50S ribosomal protein L1;Transcription termination/antitermination protein NusG;Transcription termination/antitermination protein NusG;Chromosome partition protein Smc;Phage major tail tube protein (Fragment);Uncharacterized protein;Transcription termination/antitermination protein NusG;Putative phage related protein;Transcription termination/antitermination protein NusG;50S ribosomal protein L11…	Wolbachia	Rickettsiales	Alphaproteobacteria	Scaffold57	191552-196437	Scaffold57:191552-196437	191552	196437	4885	22	13	11	12	194002;192609;192906;195935;194381;194885;193285;195084;192431;193428;191617;195451	194002;192437;192906;195935;194381;194885;193285;195084;191617;193428;NA;195451	194136;192743;193313;196417;194764;195100;193425;195359;192625;193868;192294;195570	194136;192625;193313;196417;194764;195100;193425;195359;192294;193868;NA;195570	134;134;407;482;383;215;140;275;194;440;677;119	134;188;407;482;383;215;140;275;677;440;NA;119	2;8;0;8;0;NA;5;0;0;0;4;0	2;8;0;8;0;NA;5;0;0;0;4;0	A0A060PZK6;A0A060Q0R8;A0A060Q0R8;A0A3B0IZ74;A0A6H2NST1;A0A6I6CKE2;A0A7Y6KJD4;B3CNY0;M9WQU4;Q5GRY5;Q5GST5;NA	100.0;100.0;89.6;100.0;100.0;100.0;93.5;100.0;85.9;100.0;86.7;NA	100.0;93.5;89.6;100.0;100.0;100.0;93.5;100.0;86.7;100.0;NA;NA	20.3;15.9;43.8;24.1;97.7;93.6;15.5;97.8;19.8;100.0;35.5;NA	20.3;20.9;43.8;24.1;97.7;93.6;15.5;97.8;35.5;100.0;NA;NA	5.2e-11;5.5e-13;1.5e-55;1.7e-38;NA;NA;4.9e-12;NA;1.8e-19;NA;1.2e-82;NA	5.2e-11;1.4e-19;1.5e-55;1.7e-38;NA;NA;4.9e-12;NA;1.2e-82;NA;NA;NA	GTG;ATG;ATG;ATG;ATG;ATG;ATG;ATG;TTG;ATG;TTG;ATG	GTG;TTG;ATG;ATG;ATG;ATG;ATG;NA;TTG;NA;NA;ATG	TAG;TAG;TAA;TAA;TGA;TAA;TAA;TAA;TGA;TAA;TAA;TGA	TAG;TGA;TAA;TAA;TGA;TAA;TAA;NA;TAA;L11;NA;TGA
GAGA-0229.Scaffold57.221247-224048	GAGA-0229	Cephalotes minutus	Myrmicinae	DNA polymerase I (EC 2.7.7.7);DNA polymerase I (EC 2.7.7.7);DNA polymerase I (EC 2.7.7.7)	Wolbachia	Rickettsiales	Alphaproteobacteria	Scaffold57	221247-224048	Scaffold57:221247-224048	221247	224048	2801	33	20	12	3	221247;221523;223360	221191;221523;223360	221448;221705;223977	221448;221705;223836	201;182;617	257;182;476	6;2;4	6;2;4	A0A496Q6W9;B3CMT7;C0R425	100.0;93.3;93.7	100.0;93.3;99.4	7.4;6.8;21.6	9.5;6.8;18.4	1.3e-09;4.3e-13;2.1e-50	1.2e-10;4.3e-13;1.3e-46	ATG;ATG;ATG	ATG;ATG;ATG	ACT;TAG;TAA	TAG;TAG;TAA
GAGA-0245.Chr7.18036561-18039341	GAGA-0245	Monomorium pharaonis	Myrmicinae	Uncharacterized protein;Ankyrin repeat domain-containing protein;NA;NA	Wolbachia	Rickettsiales	Alphaproteobacteria	Chr7	18036561-18039341	Chr7:18036561-18039341	18036561	18039341	2780	50	46	33	4	18037520;18038179;18036561;18039266	18037519;18038178;NA;NA	18037882;18038832;18036649;18039341	18037881;18038831;NA;NA	362;653;88;75	362;653;NA;NA	138;713;138;194	140;713;NA;NA	A0A4Y6ULF4;A0A6M5ED75;NA;NA	94.2;95.4;NA;NA	94.2;95.4;NA;NA	2.5;6.0;NA;NA	2.5;6.0;NA;NA	4.5e-23;9.5e-47;NA;NA	4.5e-23;9.5e-47;NA;NA	ATG;ATG;TAG;GAA	ATG;ATG;NA;NA	TAA;TGA;TGA;TAA	TAA;TGA;NA;NA
GAGA-0245.Chr7.18043257-18043592	GAGA-0245	Monomorium pharaonis	Myrmicinae	hypothetical protein	Wolbachia	Rickettsiales	Alphaproteobacteria	Chr7	18043257-18043592	Chr7:18043257-18043592	18043257	18043592	335	41	42	39	1	18043474	NA	18043592	NA	118	NA	209	NA	NA	NA	NA	NA	NA	NA	NA	GGA	NA	TGA	NA
GAGA-0245.Chr8.9106787-9108500	GAGA-0245	Monomorium pharaonis	Myrmicinae	Uncharacterized protein;Uncharacterized protein;Uncharacterized protein	Wolbachia	Rickettsiales	Alphaproteobacteria	Chr8	9106787-9108500	Chr8:9106787-9108500	9106787	9108500	1713	60	65	46	3	9106787;9106996;9108126	9106765;9106996;9108126	9106944;9107403;9108269	9106944;9107403;9108269	157;407;143	179;407;143	365;589;107	403;589;102	A0A060PXG8;A0A060PXG8;A0A3B0JD24	100.0;100.0;100.0	86.4;100.0;100.0	14.7;40.2;39.8	14.7;40.2;39.8	6.0e-15;4.2e-61;1.1e-11	6.1e-15;4.2e-61;1.1e-11	GTG;ATG;ATG	GTG;ATG;ATG	TAA;TAA;TAG	TAA;TAA;TAG
GAGA-0246.Scaffold7.9510351-9510585	GAGA-0246	Pseudoneoponera rufipes	Ponerinae	hypothetical protein	Spiroplasma	Entoplasmatales	Mollicutes	Scaffold7	9510351-9510585	Scaffold7:9510351-9510585	9510351	9510585	234	50	50	48	0		NA	NA	NA	NA	NA	NA	NA	NA	NA	NA	NA	NA	NA	NA	NA	NA	NA	NA
GAGA-0256.Scaffold11.5382003-5388500	GAGA-0256	Acanthomyrmex ferox	Myrmicinae	Ankyrin repeat domain protein	Wolbachia	Rickettsiales	Alphaproteobacteria	Scaffold11	5382003-5388500	Scaffold11:5382003-5388500	5382003	5388500	6497	28	37	12	1	5382045	5382045	5388500	5389322	NA	NA	NA	NA	C0R3E9	100	99.9	86.9	97.8	NA	NA	CTG	ATG	TAA	TAA
GAGA-0256.Scaffold2.7916318-7917363	GAGA-0256	Acanthomyrmex ferox	Myrmicinae	DUF1016 family protein	Wolbachia	Rickettsiales	Alphaproteobacteria	Scaffold2	7916318-7917363	Scaffold2:7916318-7917363	7916318	7917363	1045	53	53	47	1	7916749	7916749	7917363	7917363	NA	NA	NA	NA	A0A6H2NU06	97.5	97.5	36	36	1.3E-92	1.3E-92	ATG	ATG	TAG	TAG
GAGA-0256.Scaffold30.1930790-1930897	GAGA-0256	Acanthomyrmex ferox	Myrmicinae	hypothetical protein	Wolbachia	Rickettsiales	Alphaproteobacteria	Scaffold30	1930790-1930897	Scaffold30:1930790-1930897	1930790	1930897	107	40	40	38	1	1930795	1930871	1930897	1931050	NA	NA	NA	NA	NA	NA	NA	NA	NA	NA	NA	ATG	GTG	TTG	TAA
GAGA-0256.Scaffold51.1261353-1261551	GAGA-0256	Acanthomyrmex ferox	Myrmicinae	hypothetical protein	Wolbachia	Rickettsiales	Alphaproteobacteria	Scaffold51	1261353-1261551	Scaffold51:1261353-1261551	1261353	1261551	198	37	36	36	0		NA	NA	NA	NA	NA	NA	NA	NA	NA	NA	NA	NA	NA	NA	NA	NA	NA	NA
GAGA-0266.Scaffold101.143868-151118	GAGA-0266	Ectomomyrmex cf. javanus	Ponerinae	Ankyrin repeat domain protein	Wolbachia	Rickettsiales	Alphaproteobacteria	Scaffold101	143868-151118	Scaffold101:143868-151118	143868	151118	7250	103	37	3	1	143868	143472	150575	150575	6707	7103	29604	41765	B6Y9L2	97.7	97.6	44.6	47.4	0	0	TAT	TTG	TAA	TAA
GAGA-0266.Scaffold317.82414-87151	GAGA-0266	Ectomomyrmex cf. javanus	Ponerinae	Ankyrin repeat domain protein	Wolbachia	Rickettsiales	Alphaproteobacteria	Scaffold317	82414-87151	Scaffold317:82414-87151	82414	87151	4737	27	24	13	1	82414	81415	87151	88151	4737	6736	324	2211	B6Y9L2	100	97	32.799999999999997	46	0	0	TTT	ACT	ACA	TGT
GAGA-0266.Scaffold33.1565836-1571887	GAGA-0266	Ectomomyrmex cf. javanus	Ponerinae	Ankyrin repeat domain protein	Wolbachia	Rickettsiales	Alphaproteobacteria	Scaffold33	1565836-1571887	Scaffold33:1565836-1571887	1565836	1571887	6051	22	16	1	1	1565836	1565701	1571887	1572189	6051	6488	17662	18826	B6Y9L2	86.7	84	36.9	37.799999999999997	0	0	CCT	ATG	AAT	TGA
GAGA-0288.Scaffold1.1032041-1032334	GAGA-0288	Temnothorax unifasciatus	Myrmicinae	hypothetical protein;hypothetical protein	Spiroplasma	Entoplasmatales	Mollicutes	Scaffold1	1032041-1032334	Scaffold1:1032041-1032334	1032041	1032334	293	32	18	3	2	1032238;1032041	1032238;1031461	1032334;1032150	1032423;1032150	96;109	185;689	4;508	97;1327	NA;NA	NA;NA	73.8;32.8	NA;NA	86.5;36.9	NA;NA	4.2e-08;3.8e-07	ATG;ATG	ATG;ATG	TTA;AAA	TAG;TAA
GAGA-0288.Scaffold110.80331-80684	GAGA-0288	Temnothorax unifasciatus	Myrmicinae	Ankyrin repeat domain protein;NA	Wolbachia	Rickettsiales	Alphaproteobacteria	Scaffold110	80331-80684	Scaffold110:80331-80684	80331	80684	353	44	44	0	2	80386;80331	80386;NA	80577;80422	80577;NA	191;91	191;NA	0;0	0;0	C0R3E9;NA	69.8;NA	69.8;NA	1.8;NA	1.8;NA	7.1e-08;NA	7.1e-08;NA	TTG;ATG	TTG;NA	TAA;CCC	TAA;NA
GAGA-0288.Scaffold13.4154918-4156109	GAGA-0288	Temnothorax unifasciatus	Myrmicinae	DUF1016 family protein;NA	Wolbachia	Rickettsiales	Alphaproteobacteria	Scaffold13	4154918-4156109	Scaffold13:4154918-4156109	4154918	4156109	1191	23	30	2	2	4154974;4156029	4154974;4155536	4155591;4156109	4155591;4155736	617;80	617;200	207;11	200;41	A0A6H2NU06;NA	97.1;NA	97.1;NA	36.0;NA	36.0;NA	4.6e-90;NA	4.6e-90;NA	ATG;ATG	ATG;TTG	TGA;CAC	TGA;TAA
GAGA-0288.Scaffold54.1101840-1109646	GAGA-0288	Temnothorax unifasciatus	Myrmicinae	Deleted.;Ankyrin repeat domain protein	Wolbachia	Rickettsiales	Alphaproteobacteria	Scaffold54	1101840-1109646	Scaffold54:1101840-1109646	1101840	1109646	7806	29	29	28	2	1101840;1102417	NA;1102417	1101972;1109595	NA;1109595	132;7178	NA;7178	74;1372	NA;1372	A0A1L9ASN4;C0R3E9	100.0;99.7	NA;99.7	10.5;97.6	NA;97.6	7.8e-07;NA	NA;NA	CTA;ATG	NA;ATG	TAA;TGA	NA;TGA
GAGA-0288.Scaffold54.1119840-1148951	GAGA-0288	Temnothorax unifasciatus	Myrmicinae	ATP-dependent RNA helicase DeaD/DeaH box family;Ankyrin repeat domain protein;Ankyrin repeat domain protein;Ankyrin repeat domain protein	Wolbachia	Rickettsiales	Alphaproteobacteria	Scaffold54	1119840-1148951	Scaffold54:1119840-1148951	1119840	1148951	29111	61	60	58	4	1140718;1141562;1130221;1120829	1140718;1141562;1130221;1120829	1141029;1148896;1137498;1127005	1141029;1148896;1137498;1127005	311;7334;7277;6176	311;7334;7277;6176	5;361;572;1426	5;361;572;1426	A0A060Q0G1;C0R3E9;C0R3E9;C0R3E9	92.2;99.9;99.8;100.0	92.2;99.9;99.8;100.0	23.5;97.8;97.7;82.4	23.5;97.8;97.7;82.4	3.1e-11;NA;NA;NA	3.1e-11;NA;NA;NA	ATG;ATG;ATG;TTG	ATG;ATG;ATG;TTG	TAA;TAA;TAA;TAA	TAA;TAA;TAA;TAA
GAGA-0288.Scaffold75.646615-647586	GAGA-0288	Temnothorax unifasciatus	Myrmicinae	hypothetical protein	Wolbachia	Rickettsiales	Alphaproteobacteria	Scaffold75	646615-647586	Scaffold75:646615-647586	646615	647586	971	33	34	32	0		NA	NA	NA	NA	NA	NA	NA	NA	NA	NA	NA	NA	NA	NA	NA	NA	NA	NA
GAGA-0288.Scaffold75.653820-663492	GAGA-0288	Temnothorax unifasciatus	Myrmicinae	Ankyrin repeat domain protein;Ankyrin repeat domain protein;Ankyrin repeat domain protein;NA;NA	Wolbachia	Rickettsiales	Alphaproteobacteria	Scaffold75	653820-663492	Scaffold75:653820-663492	653820	663492	9672	13	12	12	5	655043;655224;659488;654758;653902	655043;655224;659488;654758;653902	655243;657245;663492;654901;654168	655243;657245;663450;654901;654168	200;2021;4004;143;266	200;2021;3962;143;266	2;44;62;4;3	2;44;62;4;3	C0R3E9;C0R3E9;C0R3E9;NA;NA	59.1;98.8;96.9;NA;NA	59.1;98.8;96.8;NA;NA	1.6;26.8;50.2;NA;NA	1.6;26.8;49.6;NA;NA	1.8e-08;2.4e-252;0.0e+00;NA;NA	1.8e-08;2.4e-252;0.0e+00;NA;NA	ATG;ATG;GTA;ATG;TTG	ATG;ATG;TTG;ATG;TTG	TAA;TGA;TAA;TGA;TAA	TAA;TGA;TAA;TGA;TAA
GAGA-0288.Scaffold75.659616-660500	GAGA-0288	Temnothorax unifasciatus	Myrmicinae	Ankyrin repeat domain protein	Wolbachia	Rickettsiales	Alphaproteobacteria	Scaffold75	659616-660500	Scaffold75:659616-660500	659616	660500	884	39	34	30	1	659616	659488	660500	661500	884	2012	12	33	C0R3E9	99.3	93.7	11.8	30.1	2.4E-99	1E-210	TTG	GCT	TAA	TAA
GAGA-0300.Scaffold510.11580-14127	GAGA-0300	Ectomomyrmex javanus	Ponerinae	Ankyrin repeat domain protein	Wolbachia	Rickettsiales	Alphaproteobacteria	Scaffold510	11580-14127	Scaffold510:11580-14127	11580	14127	2547	52	39	31	1	11580	11370	14126	15127	2546	3757	18	32	B6Y9L2	75.7	55.5	14	15	4.5000000000000003E-129	3.0999999999999998E-137	TTG	AAG	GAT	TAA
GAGA-0302.Scaffold110.354133-354326	GAGA-0302	Ochetellus glaber	Dolichoderinae	Ribose-5-phosphate isomerase A (EC 5.3.1.6) (Phosphoriboisomerase A) (PRI)	Blochmannia	Enterobacterales	Gammaproteobacteria	Scaffold110	354133-354326	Scaffold110:354133-354326	354133	354326	193	33	33	33	1	354133	354116	354326	354346	193	230	0	0	Q2NRE0	100	98.7	29.4	34.4	8.1000000000000005E-20	6.9999999999999993E-24	ATT	GTG	GTG	TGA
GAGA-0302.Scaffold111.397327-397544	GAGA-0302	Ochetellus glaber	Dolichoderinae	10 kDa chaperonin (Fragment)	Buchnera	Enterobacterales	Gammaproteobacteria	Scaffold111	397327-397544	Scaffold111:397327-397544	397327	397544	217	32	32	32	1	397327	396328	397544	397367	217	1039	0	0	A0A088FND1	95.8	NA	93.2	NA	NA	NA	TCA	AGG	TTT	TGA
GAGA-0302.Scaffold119.51017-51338	GAGA-0302	Ochetellus glaber	Dolichoderinae	Protein translocase subunit SecA (EC 7.4.2.8)	Hafnia	Enterobacterales	Gammaproteobacteria	Scaffold119	51017-51338	Scaffold119:51017-51338	51017	51338	321	50	43	42	1	51017	50948	51338	51319	321	371	0	0	Q2NVU3	96.3	88.6	11.4	12.1	1.6999999999999999E-41	4.8999999999999995E-41	ACT	ATG	CCA	TAA
GAGA-0302.Scaffold14.3530821-3531621	GAGA-0302	Ochetellus glaber	Dolichoderinae	Ubiquinol-cytochrome c reductase iron-sulfur subunit (EC 7.1.1.8);Uncharacterized protein	Wolbachia	Rickettsiales	Alphaproteobacteria	Scaffold14	3530821-3531621	Scaffold14:3530821-3531621	3530821	3531621	800	40	37	37	2	3530878;3531303	NA;3531303	3530997;3531542	NA;3531542	119;239	NA;239	1;23	NA;23	A0A369RM68;B3CP74	89.7;58.2	NA;58.2	18.1;6.1	NA;6.1	5.5e-08;1.1e-08	NA;1.1e-08	TTG;ATG	NA;ATG	TAG;TAA	NA;TAA
GAGA-0302.Scaffold162.124596-124762	GAGA-0302	Ochetellus glaber	Dolichoderinae	Protein QmcA	Mannheimia	Pasteurellaceae	Gammaproteobacteria	Scaffold162	124596-124762	Scaffold162:124596-124762	124596	124762	166	46	48	46	1	124596	124371	124762	124841	166	470	0	0	A0A084A5D2	100	35.299999999999997	18	18.2	4.7000000000000001E-20	4.7999999999999999E-20	ACA	TTG	TAG	TGA
GAGA-0302.Scaffold187.20714-20890	GAGA-0302	Ochetellus glaber	Dolichoderinae	Protein QmcA	Candidatus Tachikawaea gelatinosa	Enterobacterales	Gammaproteobacteria	Scaffold187	20714-20890	Scaffold187:20714-20890	20714	20890	176	55	55	55	1	20714	NA	20890	NA	176	NA	0	NA	A0A5J5G1C2	100	NA	19	NA	1.6999999999999999E-20	NA	TTA	NA	TTA	NA
GAGA-0302.Scaffold230.59416-59647	GAGA-0302	Ochetellus glaber	Dolichoderinae	DNA recombination protein	Baumannia	Enterobacterales	Gammaproteobacteria	Scaffold230	59416-59647	Scaffold230:59416-59647	59416	59647	231	43	30	30	1	59416	59264	59647	59728	231	464	0	0	W0HNF9	100	55.8	14.4	16.399999999999999	2.6999999999999999E-28	2.4999999999999999E-29	ATT	ATG	GAT	TAG
GAGA-0302.Scaffold406.14472-14650	GAGA-0302	Ochetellus glaber	Dolichoderinae	4-hydroxy-tetrahydrodipicolinate synthase	Candidatus Moranella endobia	Enterobacterales	Gammaproteobacteria	Scaffold406	14472-14650	Scaffold406:14472-14650	14472	14650	178	25	23	23	0		NA	NA	NA	NA	NA	NA	NA	NA	NA	NA	NA	NA	NA	NA	NA	NA	NA	NA
GAGA-0302.Scaffold59.952438-952794	GAGA-0302	Ochetellus glaber	Dolichoderinae	DNA gyrase subunit A (EC 5.6.2.2)	Yersinia_pestis_KIM1	Enterobacterales	Gammaproteobacteria	Scaffold59	952438-952794	Scaffold59:952438-952794	952438	952794	356	59	57	57	1	952438	952334	952794	952705	356	371	0	0	Q2NSL8	100	72.400000000000006	13.3	10	4.3999999999999998E-50	1.2E-34	TTT	GTG	TTA	TAA
GAGA-0306.Scaffold1.17701654-17702504	GAGA-0306	Stictoponera bicolor	Ectatomminae	Group II intron reverse transcriptase/maturase	Wolbachia	Rickettsiales	Alphaproteobacteria	Scaffold1	17701654-17702504	Scaffold1:17701654-17702504	17701654	17702504	850	25	26	22	1	17702343	17702343	17702504	17702531	161	188	0	0	A0A178GTA1	100	87.1	10.5	10.5	2.2E-17	2.2E-17	TTG	TTG	ATA	TAA
GAGA-0306.Scaffold209.16860-17415	GAGA-0306	Stictoponera bicolor	Ectatomminae	NADH-ubiquinone oxidoreductase chain 5 (EC 7.1.1.2);NADH-ubiquinone oxidoreductase chain 5 (EC 7.1.1.2)	Alpha proteobacterium HIMB5	Pelagibacterales	Alphaproteobacteria	Scaffold209	16860-17415	Scaffold209:16860-17415	16860	17415	555	17	29	17	2	17218;16860	17218;16294	17352;17136	17352;17136	134;276	134;842	0;0	0;0	A0A2U8XBR3;Q5FYT5	100.0;100.0	100.0;100.0	4.7;13.9	4.7;42.3	1.3e-14;4.4e-42	1.3e-14;2.0e-140	ATG;ATG	ATG;ATG	TGA;CTG	TGA;TGA
GAGA-0306.Scaffold70.167612-179707	GAGA-0306	Stictoponera bicolor	Ectatomminae	Ankyrin motif protein;Ankyrin repeat domain protein;Ankyrin repeat domain protein;Ankyrin repeat protein;Ankyrin 3 (Ankyrin repeat family protein)	Wolbachia	Rickettsiales	Alphaproteobacteria	Scaffold70	167612-179707	Scaffold70:167612-179707	167612	179707	12095	20	39	11	5	167612;177679;168277;179225;178298	167552;177679;168277;179225;178298	168049;177918;177564;179707;179134	168049;177918;177564;180148;179134	437;239;9287;482;836	497;239;9287;923;836	0;50;1129;228;337	2;50;1129;621;337	B9A8X1;C0R3E9;C0R3E9;E9P653;Q4EBI3	100.0;100.0;79.8;97.5;98.9	98.8;100.0;79.8;97.1;98.9	39.3;3.2;99.4;16.2;44.6	44.3;3.2;99.4;31.1;44.6	2.0e-66;1.7e-28;NA;7.5e-74;2.3e-128	5.4e-77;1.7e-28;NA;9.5e-150;2.3e-128	TAT;TTG;GTG;GTG;ATG	ATG;TTG;GTG;GTG;ATG	TAA;TGA;TGA;AAA;TAA	TAA;TGA;TGA;TAA;TAA
GAGA-0306.Scaffold70.96623-99754	GAGA-0306	Stictoponera bicolor	Ectatomminae	Riboflavin synthase alpha subunit;Riboflavin synthase alpha subunit;IS982 family transposase;Uncharacterized protein;IS982 family transposase (Fragment)	Wolbachia	Rickettsiales	Alphaproteobacteria	Scaffold70	96623-99754	Scaffold70:96623-99754	96623	99754	3131	38	35	23	5	96867;96623;98649;97140;99304	96867;NA;98649;97140;99304	97088;96820;99236;97742;99516	97088;NA;99236;97742;99516	221;197;587;602;212	221;NA;587;602;212	0;0;0;2;0	0;NA;0;2;0	A0A060Q4H3;A0A060Q4H3;A0A4S2QUV4;A0A7Y6JT42;A0A7Y6MWK2	93.2;100.0;99.5;100.0;85.7	93.2;NA;99.5;100.0;85.7	34.3;33.3;66.9;85.5;92.3	34.3;NA;66.9;85.5;92.3	1.6e-20;4.4e-26;1.4e-79;NA;NA	1.6e-20;NA;1.4e-79;NA;NA	ATG;ATG;TTG;GTG;ATG	ATG;NA;TTG;GTG;NA	TAA;AGC;TAA;TAA;TAA	TAA;NA;TAA;TAA;TAA
GAGA-0307.Scaffold17.5138154-5140217	GAGA-0307	Hypoponera opacior	Ponerinae	DNA helicase (EC 3.6.4.12)	Wolbachia	Rickettsiales	Alphaproteobacteria	Scaffold17	5138154-5140217	Scaffold17:5138154-5140217	5138154	5140217	2063	48	46	42	1	5138219	5138219	5140147	5140147	1928	1928	2416	2416	B3CMH9	99.5	99.5	99.1	99.1	NA	NA	ATG	ATG	TAA	TAA
GAGA-0328.Scaffold1.9848465-9848878	GAGA-0328	Carebara diversa	Myrmicinae	Transposase_for_insertion_sequence_element_ISRM3	Wolbachia	Rickettsiales	Alphaproteobacteria	Scaffold1	9848465-9848878	Scaffold1:9848465-9848878	9848465	9848878	413	123	122	119	1	9848465	NA	9848588	NA	123	NA	112	NA	NA	NA	NA	NA	NA	NA	NA	AAA	NA	TAG	NA
GAGA-0328.Scaffold17.636160-636366	GAGA-0328	Carebara diversa	Myrmicinae	hypothetical protein	Wolbachia	Rickettsiales	Alphaproteobacteria	Scaffold17	636160-636366	Scaffold17:636160-636366	636160	636366	206	111	108	107	0		NA	NA	NA	NA	NA	NA	NA	NA	NA	NA	NA	NA	NA	NA	NA	NA	NA	NA
GAGA-0328.Scaffold36.505675-506652	GAGA-0328	Carebara diversa	Myrmicinae	DUF1016 family protein	Wolbachia	Rickettsiales	Alphaproteobacteria	Scaffold36	505675-506652	Scaffold36:505675-506652	505675	506652	977	101	105	95	1	505676	505676	506293	506293	617	617	12297	12297	A0A6H2NU06	97.1	97.1	36	36	1.2999999999999999E-89	1.2999999999999999E-89	ATG	ATG	TGA	TGA
GAGA-0333.Scaffold8.1681954-1682103	GAGA-0333	Tetramorium bicarinatum	Myrmicinae	hypothetical protein	Wolbachia	Rickettsiales	Alphaproteobacteria	Scaffold8	1681954-1682103	Scaffold8:1681954-1682103	1681954	1682103	149	118	117	117	0		NA	NA	NA	NA	NA	NA	NA	NA	NA	NA	NA	NA	NA	NA	NA	NA	NA	NA
GAGA-0334.Scaffold49.237637-246923	GAGA-0334	Rossomyrmex quandratinodus	Formicinae	Ankyrin repeat domain protein;NA	Wolbachia	Rickettsiales	Alphaproteobacteria	Scaffold49	237637-246923	Scaffold49:237637-246923	237637	246923	9286	27	27	12	2	239540;238995	239540;238995	246923;239174	246874;239174	NA;NA	NA;NA	NA;NA	NA;NA	C0R3E9;NA	99.6;NA	99.8;NA	99.0;NA	98.6;NA	NA;NA	NA;NA	TCA;ATG	ATG;ATG	TAG;TGA	TAG;TGA
GAGA-0335.Scaffold10.5598799-5599854	GAGA-0335	Meranoplus bicolor	Myrmicinae	OTU domain-containing protein	Wolbachia	Rickettsiales	Alphaproteobacteria	Scaffold10	5598799-5599854	Scaffold10:5598799-5599854	5598799	5599854	1055	80	62	59	1	5599332	5599332	5599854	5600854	522	1522	1573	2188	A0A060Q434	96.6	33.299999999999997	56.2	56.6	4.4000000000000001E-58	2.4000000000000001E-57	ATG	ATG	AAA	TAC
GAGA-0335.Scaffold10.5604018-5604755	GAGA-0335	Meranoplus bicolor	Myrmicinae	Ankyrin repeat domain protein;NA;NA	Wolbachia	Rickettsiales	Alphaproteobacteria	Scaffold10	5604018-5604755	Scaffold10:5604018-5604755	5604018	5604755	737	99	115	96	3	5604292;5604018;5604681	5604292;NA;NA	5604579;5604077;5604755	5604579;NA;NA	287;59;74	287;NA;NA	1510;264;1322	1510;NA;NA	M9WQI6;NA;NA	97.9;NA;NA	97.9;NA;NA	3.9;NA;NA	3.9;NA;NA	6.5e-22;NA;NA	6.5E-22;NA;NA	ATG;AGA;GTG	ATG;NA;NA	TAG;TGA;GAC	TAG;NA;NA
GAGA-0341.Scaffold23.1757381-1758180	GAGA-0341	Nylanderia fulva	Formicinae	Uncharacterized protein;Uncharacterized protein;NA	Wolbachia	Rickettsiales	Alphaproteobacteria	Scaffold23	1757381-1758180	Scaffold23:1757381-1758180	1757381	1758180	799	34	25	22	3	1757575;1758000;1757854	1757575;1758000;1757806	1757724;1758180;1758003	1757724;1758242;1758003	149;180;149	149;242;197	498;53;365	498;66;486	A0A7G5CCF5;Q5GRL5;NA	100.0;86.7;NA	100.0;65.0;89.2	11.0;7.1;NA	11.0;7.1;12.5	1.0e-09;4.3e-13;NA	1.0e-09;4.4e-13;5.8e-10	ATG;GTG;ATG	ATG;GTG;TTG	TAG;ATG;TGA	TAG;TAG;TGA
GAGA-0341.Scaffold46.1271582-1272458	GAGA-0341	Nylanderia fulva	Formicinae	Ribonucleoside-diphosphate reductase subunit beta (EC 1.17.4.1)	Zobellia	Flavobacteriales	Flavobacteriia	Scaffold46	1271582-1272458	Scaffold46:1271582-1272458	1271582	1272458	876	107	121	100	1	1271582	1271510	1272458	1272526	876	1016	0	0	A0A2D6JID3	100	96.4	90.1	100	NA	NA	TTC	ATG	AGC	TAA
GAGA-0346.Scaffold1.5185728-5186197	GAGA-0346	Megalomyrmex milenae	Myrmicinae	3-oxoacyl-[acyl-carrier-protein] synthase 2 (EC 2.3.1.179)	Azospirillium	Rhodospirillales	Alphaproteobacteria	Scaffold1	5185728-5186197	Scaffold1:5185728-5186197	5185728	5186197	469	28	28	28	1	5185728	5185579	5186197	5186139	469	560	545	585	A0A3M2EQF0	NA	100	NA	43.5	NA	1.4E-51	GAA	ATG	ACC	TAA
GAGA-0350.Scaffold14.2303732-2303983	GAGA-0350	Formica cf. japonica	Formicinae	Ribosomal RNA small subunit methyltransferase A (EC 2.1.1.182) (16S rRNA (adenine(1518)-N(6)/adenine(1519)-N(6))-dimethyltransferase) (16S rRNA dimethyladenosine transferase) (16S rRNA dimethylase) (S-adenosylmethionine-6-N', N'-adenosyl(rRNA) dimethyltransferase);NA	Spiroplasma	Entoplasmatales	Mollicutes	Scaffold14	2303732-2303983	Scaffold14:2303732-2303983	2303732	2303983	251	40	40	40	2	2303732;2303911	2303696;NA	2303932;2303983	2303932;NA	200;72	236;NA	0;0	0;0	W0GSI6;NA	94.0;NA	88.5;NA	21.0;NA	25.6;NA	3.2e-13;NA	1.2e-13;NA	TTG;ATC	TTG;NA	GAA;TAA	TAA;NA
GAGA-0350.Scaffold21.1074942-1075284	GAGA-0350	Formica cf. japonica	Formicinae	Transposase;NA	Wolbachia	Rickettsiales	Alphaproteobacteria	Scaffold21	1074942-1075284	Scaffold21:1074942-1075284	1074942	1075284	342	45	44	43	2	1074942;1075186	1074926;1075186	1075105;1075284	1075105;1075362	163;98	179;176	3;8	3;8	A0A178GYM1;NA	83.3;NA	86.4;NA	14.7;NA	16.7;NA	1.0e-14;NA	2.7e-15;NA	ATG;ATG	ATG;ATG	AAT;CTG	TAA;TAA
GAGA-0350.Scaffold9.243113-243382	GAGA-0350	Formica cf. japonica	Formicinae	hypothetical protein	Spiroplasma	Entoplasmatales	Mollicutes	Scaffold9	243113-243382	Scaffold9:243113-243382	243113	243382	269	49	51	49	1	243113	NA	243181	NA	68	NA	22	NA	NA	NA	NA	NA	NA	NA	NA	ATT	NA	TAA	NA
GAGA-0353.Scaffold133.189330-190383	GAGA-0353	Odontomachus cf. monticola	Ponerinae	Transposase;Uncharacterized protein	Wolbachia	Rickettsiales	Alphaproteobacteria	Scaffold133	189330-190383	Scaffold133:189330-190383	189330	190383	1053	39	38	38	2	189447;189330	189447;189306	189572;189434	189572;189434	125;104	125;128	0;0	0;0	A0A176Q5F8;Q73I80	100.0;100.0	100.0;100.0	13.7;11.6	13.7;13.9	8.1e-12;2.5e-08	8.1e-12;1.4e-08	TTG;ATG	TTG;ATG	TAA;AAG	TAA;TAG
GAGA-0353.Scaffold133.191513-191764	GAGA-0353	Odontomachus cf. monticola	Ponerinae	Transposase	Wolbachia	Rickettsiales	Alphaproteobacteria	Scaffold133	191513-191764	Scaffold133:191513-191764	191513	191764	251	26	30	23	1	191513	NA	191764	NA	251	NA	0	NA	A0A178GWB3	100	NA	29.5	NA	4.0000000000000002E-27	NA	AAA	NA	CTC	NA
GAGA-0353.Scaffold133.199761-200244	GAGA-0353	Odontomachus cf. monticola	Ponerinae	Uncharacterized protein	Wolbachia	Rickettsiales	Alphaproteobacteria	Scaffold133	199761-200244	Scaffold133:199761-200244	199761	200244	483	26	26	26	1	199761	199755	200244	200267	483	512	0	0	Q73I80	100	94.7	53.1	53.1	3.6E-76	3.5E-76	CTT	GTG	GAA	TAG
GAGA-0353.Scaffold133.207168-208799	GAGA-0353	Odontomachus cf. monticola	Ponerinae	Uncharacterized protein	Wolbachia	Rickettsiales	Alphaproteobacteria	Scaffold133	207168-208799	Scaffold133:207168-208799	207168	208799	1631	41	40	40	1	207168	207081	207893	207893	725	812	0	0	Q73I80	100	89.6	82.5	82.5	NA	NA	TTG	TTG	GAT	TAG
GAGA-0353.Scaffold133.215501-215992	GAGA-0353	Odontomachus cf. monticola	Ponerinae	Transposase;Uncharacterized protein	Wolbachia	Rickettsiales	Alphaproteobacteria	Scaffold133	215501-215992	Scaffold133:215501-215992	215501	215992	491	43	43	43	2	215793;215501	NA;214958	215992;215645	NA;215503	199;144	NA;545	0;0	0;0	A0A176Q5F8;Q4EAY4	100.0;100.0	NA;89.0	21.7;22.3	NA;17.2	2.7e-23;1.7e-17	NA;4.8e-41	GAG;TTG	NA;ATG	TAA;ATG	NA;TAA
GAGA-0353.Scaffold133.253686-255518	GAGA-0353	Odontomachus cf. monticola	Ponerinae	Putative transcriptional regulator;Transposase;Uncharacterized protein	Wolbachia	Rickettsiales	Alphaproteobacteria	Scaffold133	253686-255518	Scaffold133:253686-255518	253686	255518	1832	27	26	26	3	254937;254286;253941	254937;254286;253941	255263;254510;254273	255263;254510;254273	326;224;332	326;224;332	0;0;0	0;0;0	A0A059PCT2;A0A178GYM1;B6Y9U6	89.8;100.0;100.0	89.8;100.0;100.0	72.4;24.8;32.3	72.4;24.8;32.3	3.0e-30;5.6e-29;1.0e-51	3.0e-30;5.6e-29;1.0e-51	GTG;ATG;ATG	GTG;ATG;ATG	TAA;TAA;TAA	TAA;TAA;TAA
GAGA-0353.Scaffold133.280889-283600	GAGA-0353	Odontomachus cf. monticola	Ponerinae	Putative transcriptional regulator;Transposase;Helix-turn-helix transcriptional regulator;Uncharacterized protein	Wolbachia	Rickettsiales	Alphaproteobacteria	Scaffold133	280889-283600	Scaffold133:280889-283600	280889	283600	2711	30	28	26	4	281099;282727;280889;282943	281099;282727;280796;282943	281470;282930;281050;283326	281470;282930;281050;283326	371;203;161;383	371;203;254;383	18;16;0;0	18;16;0;0	A0A059PCT2;A0A178GYM1;A0A4Y6URN4;Q4EAY4	91.1;98.5;100.0;99.2	91.1;98.5;64.3;99.2	83.6;21.6;16.6;58.6	83.6;21.6;16.6;58.6	NA;4.7e-28;3.3e-13;5.5e-61	NA;4.7e-28;3.3e-13;5.5e-61	GTG;ATG;ATG;ATG	GTG;ATG;ATG;ATG	TAA;TAA;CAA;TAA	TAA;TAA;TGA;TAA
GAGA-0353.Scaffold33.2046976-2047194	GAGA-0353	Odontomachus cf. monticola	Ponerinae	Uncharacterized protein	Spiroplasma	Entoplasmatales	Mollicutes	Scaffold33	2046976-2047194	Scaffold33:2046976-2047194	2046976	2047194	218	28	27	26	1	2047074	NA	2047194	NA	120	NA	15	NA	A0A345DSQ5	100	NA	56.3	NA	1.6E-7	NA	GAA	NA	TAG	NA
GAGA-0353.Scaffold5.4546747-4546986	GAGA-0353	Odontomachus cf. monticola	Ponerinae	Uncharacterized protein	Spiroplasma	Entoplasmatales	Mollicutes	Scaffold5	4546747-4546986	Scaffold5:4546747-4546986	4546747	4546986	239	51	49	48	1	4546795	4546795	4546986	4546992	191	197	0	0	A0A0H3XHK8	100	98.5	19.8	19.8	2.4999999999999999E-13	2.4999999999999999E-13	ATG	ATG	AAA	TAA
GAGA-0354.Scaffold108.264230-264804	GAGA-0354	Cataglyphis aenescens	Formicinae	Cell_shape-determining_protein_MreB	Spiroplasma	Entoplasmatales	Mollicutes	Scaffold108	264230-264804	Scaffold108:264230-264804	264230	264804	574	62	64	61	1	264663	NA	264804	NA	141	NA	0	NA	NA	NA	NA	NA	NA	NA	NA	ATT	NA	TAA	NA
GAGA-0356.Scaffold15.1419548-1423314	GAGA-0356	Aphaenogaster exasperata	Myrmicinae	Ankyrin repeat protein;Ankyrin 3 (Ankyrin repeat family protein)	Wolbachia	Rickettsiales	Alphaproteobacteria	Scaffold15	1419548-1423314	Scaffold15:1419548-1423314	1419548	1423314	3766	19	20	14	2	1421225;1419599	1421225;1419599	1423261;1420378	1423261;1420378	2036;779	2036;779	25902;5054	25902;5054	E9P653;Q4EBI3	100.0;98.5	100.0;98.5	72.1;41.3	72.1;41.3	0.0e+00;1.2e-117	0.0e+00;1.2e-117	TTG;ATG	TTG;ATG	TAA;TAA	TAA;TAA
GAGA-0356.Scaffold34.2310166-2313994	GAGA-0356	Aphaenogaster exasperata	Myrmicinae	Ankyrin repeat domain protein	Wolbachia	Rickettsiales	Alphaproteobacteria	Scaffold34	2310166-2313994	Scaffold34:2310166-2313994	2310166	2313994	3828	49	47	34	1	2310166	2309869	2312919	2312919	2753	3050	253	261	B3CPR7	98.7	95.3	35.299999999999997	37.6	3.2000000000000001E-152	5.8000000000000002E-163	ATG	ATG	GAA	TGA
GAGA-0359.Scaffold11.5852663-5853883	GAGA-0359	Formica japonica	Formicinae	Cyclopropane fatty acyl phospholipid synthase (EC 2.1.1.79)	Sodalis	Enterobacterales	Gammaproteobacteria	Scaffold11	5852663-5853883	Scaffold11:5852663-5853883	5852663	5853883	1220	92	89	86	1	5852725	5852725	5853873	5853873	1148	1148	4024	4024	A0A151ULI1	100	100	100	100	NA	NA	ATG	ATG	TGA	TGA
GAGA-0359.Scaffold114.45916-47135	GAGA-0359	Formica japonica	Formicinae	Cyclopropane fatty acyl phospholipid synthase (EC 2.1.1.79)	Sodalis	Enterobacterales	Gammaproteobacteria	Scaffold114	45916-47135	Scaffold114:45916-47135	45916	47135	1219	53	63	51	1	45978	45978	47126	47126	1148	1148	178	178	A0A151ULI1	100	100	100	100	NA	NA	ATG	ATG	TGA	TGA
GAGA-0359.Scaffold12.3361534-3361785	GAGA-0359	Formica japonica	Formicinae	Ribosomal RNA small subunit methyltransferase A (EC 2.1.1.182) (16S rRNA (adenine(1518)-N(6)/adenine(1519)-N(6))-dimethyltransferase) (16S rRNA dimethyladenosine transferase) (16S rRNA dimethylase) (S-adenosylmethionine-6-N', N'-adenosyl(rRNA) dimethyltransferase);NA	Spiroplasma	Entoplasmatales	Mollicutes	Scaffold12	3361534-3361785	Scaffold12:3361534-3361785	3361534	3361785	251	57	59	56	2	3361584;3361534	3361584;3361584	3361785;3361605	3361820;3361820	201;71	236;236	10;0	10;10	W0GSI6;NA	94.0;NA	88.5;88.5	21.0;NA	25.6;25.6	3.2e-13;NA	1.2e-13;1.2e-13	TTG;TCA	TTG;TTG	AAA;TAA	TAA;TAA
GAGA-0359.Scaffold14.4817696-4818038	GAGA-0359	Formica japonica	Formicinae	Transposase;NA	Wolbachia	Rickettsiales	Alphaproteobacteria	Scaffold14	4817696-4818038	Scaffold14:4817696-4818038	4817696	4818038	342	40	30	26	2	4817874;4817696	4817874;4817617	4818038;4817793	4818053;4817793	164;97	179;176	51;136	51;175	A0A178GYM1;NA	81.8;NA	86.4;NA	14.7;NA	16.7;NA	1.0e-14;NA	2.7e-15;NA	ATG;ATG	ATG;ATG	ATG;CCT	TAA;TAA
GAGA-0359.Scaffold2.8938296-8942661	GAGA-0359	Formica japonica	Formicinae	Cyclopropane fatty acyl phospholipid synthase (EC 2.1.1.79);NA;NA;NA;NA	Sodalis;Rahnella	Enterobacterales	Gammaproteobacteria	Scaffold2	8938296-8942661	Scaffold2:8938296-8942661	8938296	8942661	4365	53	63	44	5	8938358;8941762;8942472;8941469;8939854	8938358;8941762;8942014;8941469;8939854	8939320;8941941;8942661;8941810;8940033	8939320;8941941;8942610;8941810;8940033	962;179;189;341;179	962;179;596;341;179	8;8;0;0;0	8;8;20;0;0	A0A151ULI1;NA;NA;NA;NA	95.3;NA;NA;NA;NA	95.3;NA;69.2;NA;NA	79.9;NA;NA;NA;NA	79.9;NA;36.0;NA;NA	NA;NA;NA;NA;NA	NA;NA;1.2e-60;NA;NA	ATG;ATG;GCA;GTG;ATG	ATG;ATG;ATG;GTG;ATG	TAA;TAA;TAA;TAA;TAA	TAA;TAA;TGA;TAA;TAA
GAGA-0359.Scaffold27.548903-551122	GAGA-0359	Formica japonica	Formicinae	Cyclopropane fatty acyl phospholipid synthase (EC 2.1.1.79);Cyclopropane-fatty-acyl-phospholipid synthase	Pantoea;Yersinia	Enterobacterales	Gammaproteobacteria	Scaffold27	548903-551122	Scaffold27:548903-551122	548903	551122	2219	115	125	98	2	548911;550334	548911;550334	549411;551059	549411;551059	500;725	500;725	838;1076	838;1076	A0A151ULI1;A0A4R1NAR1	100.0;85.1	100.0;85.1	43.3;53.8	43.3;53.8	5.0e-78;2.4e-82	5.0e-78;2.4e-82	TTG;ATG	TTG;ATG	TGA;TAA	TGA;TAA
GAGA-0359.Scaffold43.592158-593375	GAGA-0359	Formica japonica	Formicinae	Cyclopropane fatty acyl phospholipid synthase (EC 2.1.1.79)	Erwinia	Enterobacterales	Gammaproteobacteria	Scaffold43	592158-593375	Scaffold43:592158-593375	592158	593375	1217	51	50	48	1	592164	592164	593312	593312	1148	1148	316	316	A0A151ULI1	100	100	100	100	NA	NA	ATG	ATG	TGA	TGA
GAGA-0360.Scaffold1.7490670-7491775	GAGA-0360	Colobopsis sp.	Formicinae	PQQ enzyme repeat protein	Sodalis	Enterobacterales	Gammaproteobacteria	Scaffold1	7490670-7491775	Scaffold1:7490670-7491775	7490670	7491775	1105	21	24	21	1	7490670	7490661	7491775	7491794	1105	1133	3816	3866	W0HTS9	100	98.9	97.9	99.2	NA	NA	ACA	TTG	ACG	TAA
GAGA-0363.Scaffold1.837744-837938	GAGA-0363	Iridomyrmex anceps	Dolichoderinae	FeS assembly ATPase SufC	Baumannia	Enterobacterales	Gammaproteobacteria	Scaffold1	837744-837938	Scaffold1:837744-837938	837744	837938	194	70	70	68	1	837744	837596	837937	837937	193	341	0	0	A0A0B6FTA7	93.8	69.900000000000006	24.2	31.9	3.4E-18	1.4999999999999999E-18	TTG	TTG	AGA	TGA
GAGA-0363.Scaffold10.3446272-3446687	GAGA-0363	Iridomyrmex anceps	Dolichoderinae	Chaperone protein HtpG (Heat shock protein HtpG) (High temperature protein G)	Candidatus_Hamiltonella	Enterobacterales	Gammaproteobacteria	Scaffold10	3446272-3446687	Scaffold10:3446272-3446687	3446272	3446687	415	51	53	50	1	3446429	3446429	3446687	3446713	258	284	140	145	A0A250BFQ5	100	91.5	13.7	13.7	1.5000000000000001E-29	1.5000000000000001E-29	ATG	ATG	GCA	TAA
GAGA-0363.Scaffold10.7932710-7932924	GAGA-0363	Iridomyrmex anceps	Dolichoderinae	Chaperone protein Skp	Yersinia	Enterobacterales	Gammaproteobacteria	Scaffold10	7932710-7932924	Scaffold10:7932710-7932924	7932710	7932924	214	74	75	73	1	7932710	7932728	7932924	7932934	214	206	32	31	A0A143WT60	100	100	43	41.2	1.5999999999999999E-20	2.6999999999999999E-18	GCG	ATG	AGA	TAA
GAGA-0363.Scaffold15.2721767-2721972	GAGA-0363	Iridomyrmex anceps	Dolichoderinae	Thymidine_kinase	Blochmannia	Enterobacterales	Gammaproteobacteria	Scaffold15	2721767-2721972	Scaffold15:2721767-2721972	2721767	2721972	205	66	66	65	1	2721880	NA	2721972	NA	92	NA	1063	NA	NA	NA	NA	NA	NA	NA	NA	TTA	NA	TAG	NA
GAGA-0363.Scaffold15.6376837-6377052	GAGA-0363	Iridomyrmex anceps	Dolichoderinae	Queuine tRNA-ribosyltransferase (EC 2.4.2.29) (Guanine insertion enzyme) (tRNA-guanine transglycosylase)	secondary_endosymbiont	NA	NA	Scaffold15	6376837-6377052	Scaffold15:6376837-6377052	6376837	6377052	215	29	29	29	1	6376837	6376756	6377052	6377046	215	290	0	0	A0A1Y0CTQ9	98.6	76	18.7	19.3	2.2000000000000002E-25	1.7E-25	ACA	ATG	CTT	TGA
GAGA-0363.Scaffold2.13656233-13656485	GAGA-0363	Iridomyrmex anceps	Dolichoderinae	DNA-binding_protein_H-NS_homolog	Yersinia	Enterobacterales	Gammaproteobacteria	Scaffold2	13656233-13656485	Scaffold2:13656233-13656485	13656233	13656485	252	52	51	51	1	13656233	NA	13656295	NA	62	NA	4	NA	NA	NA	NA	NA	NA	NA	NA	ATG	NA	AAT	NA
GAGA-0363.Scaffold22.1017322-1017555	GAGA-0363	Iridomyrmex anceps	Dolichoderinae	Transcription-repair-coupling factor (TRCF) (EC 3.6.4.-)	Histophilus_somni	Pasteurellaceae	Gammaproteobacteria	Scaffold22	1017322-1017555	Scaffold22:1017322-1017555	1017322	1017555	233	72	72	72	1	1017431	1017431	1017555	1017592	124	161	0	0	A0A084A6T8	97.5	73.599999999999994	3.4	3.4	2.8999999999999999E-9	2.8999999999999999E-9	CTG	ATG	TAA	TAA
GAGA-0363.Scaffold29.427602-428063	GAGA-0363	Iridomyrmex anceps	Dolichoderinae	UTP--glucose-1-phosphate uridylyltransferase (EC 2.7.7.9) (UDP-glucose pyrophosphorylase);NA	Sodalis	Enterobacterales	Gammaproteobacteria	Scaffold29	427602-428063	Scaffold29:427602-428063	427602	428063	461	74	70	68	2	427701;427993	427701;427993	427868;428063	427868;428184	167;70	167;191	77;7	77;7	Q2NT83;NA	89.1;NA	89.1;NA	16.3;NA	16.3;NA	1.6e-12;NA	1.6e-12;NA	ATG;ATG	ATG;ATG	TAA;AGA	TAA;TAA
GAGA-0363.Scaffold36.521520-521743	GAGA-0363	Iridomyrmex anceps	Dolichoderinae	Acetolactate synthase (EC 2.2.1.6)	Frischella	Orbales	Gammaproteobacteria	Scaffold36	521520-521743	Scaffold36:521520-521743	521520	521743	223	38	38	38	1	521520	521535	521743	521768	223	233	10	10	G2LP94	91.9	97.4	11.9	13.1	1.3E-22	2.6E-23	TAT	ATG	ACA	TAA
GAGA-0363.Scaffold4.6848778-6849482	GAGA-0363	Iridomyrmex anceps	Dolichoderinae	Uncharacterized protein;NA	Wolbachia	Rickettsiales	Alphaproteobacteria	Scaffold4	6848778-6849482	Scaffold4:6848778-6849482	6848778	6849482	704	62	62	59	2	6848853;6849364	6848645;6848853	6849092;6849482	6848788;6849092	239;118	143;239	112;138	1837;98	B3CP74;NA	58.2;NA	NA;58.2	6.1;NA	NA;6.1	3.8e-09;NA	NA;3.8e-09	ATG;TTG	TTG;ATG	TAA;TAA	TGA;TAA
GAGA-0363.Scaffold7.9802049-9802512	GAGA-0363	Iridomyrmex anceps	Dolichoderinae	Aspartate--tRNA ligase (EC 6.1.1.12) (Aspartyl-tRNA synthetase) (AspRS);NA	Candidatus_Pantoea	Enterobacterales	Gammaproteobacteria	Scaffold7	9802049-9802512	Scaffold7:9802049-9802512	9802049	9802512	463	104	103	101	2	9802234;9802049	9802234;NA	9802512;9802129	9802557;NA	278;80	323;NA	42;52	45;NA	A0A088N1N4;NA	86.0;NA	76.6;NA	14.3;NA	14.7;NA	1.9e-29;7.7e-10	1.8e-30;NA	ATG;ATG	ATG;NA	CAG;AAT	TAG;NA
GAGA-0364.Scaffold11.176113-182126	GAGA-0364	Lasius cf. spathepus	Formicinae	Ankyrin repeat protein	Wolbachia	Rickettsiales	Alphaproteobacteria	Scaffold11	176113-182126	Scaffold11:176113-182126	176113	182126	6013	18	68	8	1	176113	176106	182081	182081	5968	5975	149	149	E9P653	46.4	46.4	94.2	94.4	3.1E-251	6.1999999999999997E-252	ATG	ATG	GGT	TAA
GAGA-0364.Scaffold43.1401998-1404475	GAGA-0364	Lasius cf. spathepus	Formicinae	Ankyrin repeats family protein;Ankyrin repeat protein	Wolbachia	Rickettsiales	Alphaproteobacteria	Scaffold43	1401998-1404475	Scaffold43:1401998-1404475	1401998	1404475	2477	34	53	32	2	1401998;1403057	1401991;1403057	1403106;1404430	1403106;1404430	1108;1373	1115;1373	1735;4743	1735;4743	A0A5B9JVP8;E9P653	91.6;98.0	91.6;98.0	93.7;54.3	94.3;54.3	NA;4.3e-135	NA;4.3e-135	ATG;ATG	ATG;ATG	GGT;TGA	TAA;TGA
GAGA-0364.Scaffold43.1410013-1410386	GAGA-0364	Lasius cf. spathepus	Formicinae	Ankyrin 3 (Ankyrin repeat family protein)	Wolbachia	Rickettsiales	Alphaproteobacteria	Scaffold43	1410013-1410386	Scaffold43:1410013-1410386	1410013	1410386	373	75	74	74	1	1410013	1409961	1410386	1411386	373	1425	810	1467	Q4EBI3	100	88.8	19.899999999999999	70.3	9.2000000000000002E-32	2.5E-101	CTA	AGA	ACT	TAG
GAGA-0364.Scaffold43.1414194-1414359	GAGA-0364	Lasius cf. spathepus	Formicinae	hypothetical protein	Wolbachia	Rickettsiales	Alphaproteobacteria	Scaffold43	1414194-1414359	Scaffold43:1414194-1414359	1414194	1414359	165	60	61	60	1	1414194	NA	1414310	NA	116	NA	36	NA	NA	NA	NA	NA	NA	NA	NA	ATG	NA	AAA	NA
GAGA-0364.Scaffold7.2120617-2120836	GAGA-0364	Lasius cf. spathepus	Formicinae	hypothetical protein	Wolbachia	Rickettsiales	Alphaproteobacteria	Scaffold7	2120617-2120836	Scaffold7:2120617-2120836	2120617	2120836	219	47	48	47	1	2120617	2120570	2120767	2120767	150	197	331	345	NA	NA	NA	NA	NA	NA	NA	TAA	ATG	TGA	TGA
GAGA-0364.Scaffold82.445850-449075	GAGA-0364	Lasius cf. spathepus	Formicinae	Uncharacterized protein (Fragment)	Wolbachia	Rickettsiales	Alphaproteobacteria	Scaffold82	445850-449075	Scaffold82:445850-449075	445850	449075	3225	48	142	38	1	445894	445894	449075	449493	3181	3599	1545	1946	A0A1Q3WAM0	96.7	85.5	77.099999999999994	77.099999999999994	NA	NA	ATG	ATG	AGT	TAA
GAGA-0364.Scaffold9.1171614-1171950	GAGA-0364	Lasius cf. spathepus	Formicinae	Ankyrin 3 (Ankyrin repeat family protein);Ankyrin 3 (Ankyrin repeat family protein)	Wolbachia	Rickettsiales	Alphaproteobacteria	Scaffold9	1171614-1171950	Scaffold9:1171614-1171950	1171614	1171950	336	82	78	77	1	1171614;1171614	1171930;1170988	1171950;1171950	1172496;1171617	336;336	566;629	1035;1035	762;1656	Q4EBI3;Q4EBI3	98.2;98.2	88.3;95.2	17.7;17.7	20.0;68.5	3.5e-31;3.5e-31	3.3e-48;2.5e-54	AAA;AAA	GTG;ATG	TGG;TGG	TAA;TAA
GAGA-0364.Scaffold9.1223187-1224771	GAGA-0364	Lasius cf. spathepus	Formicinae	Ankyrin repeat protein;Ankyrin 3 (Ankyrin repeat family protein);Ankyrin 3 (Ankyrin repeat family protein)	Wolbachia	Rickettsiales	Alphaproteobacteria	Scaffold9	1223187-1224771	Scaffold9:1223187-1224771	1223187	1224771	1584	44	48	33	3	1223187;1224349;1223753	1223092;1224349;1223753	1223787;1224726;1224373	1223787;1224726;1224373	600;377;620	695;377;620	0;0;0	0;0;0	E9P653;Q4EBI3;Q4EBI3	98.0;68.0;97.1	86.1;68.0;97.1	20.5;13.8;34.0	20.8;13.8;34.0	1.1e-56;2.7e-31;4.8e-47	6.9e-57;2.7e-31;4.8e-47	TTG;ATG;ATG	TTG;ATG;ATG	ATG;TAA;TAA	TAA;TAA;TAA
GAGA-0364.Scaffold9.1266904-1269437	GAGA-0364	Lasius cf. spathepus	Formicinae	Ankyrin repeats family protein;Ankyrin repeat protein	Wolbachia	Rickettsiales	Alphaproteobacteria	Scaffold9	1266904-1269437	Scaffold9:1266904-1269437	1266904	1269437	2533	45	31	25	2	1266904;1267321	1266897;1267321	1267274;1269399	1267274;1269399	370;2078	377;2078	709;7355	709;7355	A0A5B9JVP8;E9P653	100.0;94.7	100.0;94.7	36.1;61.9	36.7;61.9	9.9e-34;2.6e-140	2.0e-34;2.6e-140	ATG;ATG	ATG;ATG	GGT;TGA	TAA;TGA
GAGA-0364.Scaffold9.895513-897640	GAGA-0364	Lasius cf. spathepus	Formicinae	Ankyrin repeats family protein;Ankyrin repeat protein;Ankyrin 3 (Ankyrin repeat family protein)	Wolbachia	Rickettsiales	Alphaproteobacteria	Scaffold9	895513-897640	Scaffold9:895513-897640	895513	897640	2127	65	82	58	3	897260;895513;896637	897260;895737;896637	897640;896513;897041	897646;896513;897041	380;1000;404	386;776;404	36;55;32	36;45;32	A0A5B9JVP8;E9P653;Q4EBI3	99.2;97.9;94.8	99.2;97.3;94.8	37.0;30.8;20.1	37.2;40.2;20.1	1.1e-37;7.9e-92;3.5e-31	6.5e-38;4.6e-61;3.5e-31	GTG;TTC;GTG	GTG;ATG;GTG	GTA;TAA;TAA	TAA;TAA;TAA
GAGA-0364.Scaffold97.313038-313805	GAGA-0364	Lasius cf. spathepus	Formicinae	Ankyrin 3 (Ankyrin repeat family protein)	Wolbachia	Rickettsiales	Alphaproteobacteria	Scaffold97	313038-313805	Scaffold97:313038-313805	313038	313805	767	53	66	49	1	313038	312792	313805	314468	767	1676	6	52	Q4EBI3	99.6	92.7	40	71.5	2.4000000000000001E-54	3.7999999999999999E-115	GAA	ATG	GCT	TAA
GAGA-0365.Scaffold16.6016032-6017206	GAGA-0365	Tetraponera rufonigra	Pseudomyrmecinae	Uncharacterized protein;Transposase	Wolbachia	Rickettsiales	Alphaproteobacteria	Scaffold16	6016032-6017206	Scaffold16:6016032-6017206	6016032	6017206	1174	36	51	26	2	6016337;6016090	6016337;6016090	6017134;6016374	6017134;6016374	797;284	797;284	150;9	150;9	A0A060Q487;A0A178GY31	55.8;89.4	55.8;89.4	47.6;26.4	47.6;26.4	5.0e-58;5.2e-35	5.0e-58;5.2e-35	GTG;TTG	GTG;TTG	TAA;TGA	TAA;TGA
GAGA-0365.Scaffold3.140293-145054	GAGA-0365	Tetraponera rufonigra	Pseudomyrmecinae	Ankyrin domain protein;Ankyrin repeat domain-containing protein;Ankyrin repeat domain-containing protein;Uncharacterized protein;Uncharacterized protein;Ankyrin repeat domain protein;Ankyrin repeat domain protein;NA	Wolbachia	Rickettsiales	Alphaproteobacteria	Scaffold3	140293-145054	Scaffold3:140293-145054	140293	145054	4761	36	59	30	8	143882;142693;141609;141086;140727;143527;142027;140968	143882;142672;141609;141032;140142;143527;142027;140727	144211;142983;141809;141454;140873;143820;142383;141126	144211;142983;141809;141454;140306;143820;142383;140873	329;290;200;368;146;293;356;158	329;311;200;422;164;293;356;146	0;0;0;0;0;0;1;0	0;0;0;0;0;0;1;0	A0A1V2N695;A0A6I6CKQ4;A0A6I6CQL0;A0A6I6CVW7;A0A6I6CVW7;M9WV12;M9WV12;NA	85.3;96.9;100.0;96.7;81.2;96.9;97.5;NA	85.3;97.1;100.0;84.3;NA;96.9;97.5;81.2	25.4;15.1;34.9;21.2;6.8;11.4;14.3;NA	25.4;16.2;34.9;21.2;NA;11.4;14.3;6.8	4.3e-21;9.7e-26;3.6e-12;2.5e-21;4.7e-07;9.4e-32;2.6e-34;NA	4.3e-21;9.5e-29;3.6e-12;2.5e-21;NA;9.4e-32;2.6e-34;4.7e-07	GTG;ATG;ATG;GTG;ATG;TTG;ATG;TTG	GTG;ATG;ATG;ATG;ATG;TTG;ATG;ATG	TGA;TAG;TAA;TAA;TGA;TAA;TAA;TAA	TGA;TAG;TAA;TAA;TAA;TAA;TAA;TGA
GAGA-0365.Scaffold3.164904-165353	GAGA-0365	Tetraponera rufonigra	Pseudomyrmecinae	hypothetical protein	Wolbachia	Rickettsiales	Alphaproteobacteria	Scaffold3	164904-165353	Scaffold3:164904-165353	164904	165353	449	37	34	26	0		NA	NA	NA	NA	NA	NA	NA	NA	NA	NA	NA	NA	NA	NA	NA	NA	NA	NA
GAGA-0365.Scaffold3.181903-182116	GAGA-0365	Tetraponera rufonigra	Pseudomyrmecinae	Uncharacterized protein	Wolbachia	Rickettsiales	Alphaproteobacteria	Scaffold3	181903-182116	Scaffold3:181903-182116	181903	182116	213	27	27	27	1	181903	181560	182116	182060	213	500	0	2	A0A176Q262	100	99.4	1.8	4.2	1.0999999999999999E-19	2.2999999999999999E-54	ATA	TTG	AAG	TGA
GAGA-0365.Scaffold3.225903-226228	GAGA-0365	Tetraponera rufonigra	Pseudomyrmecinae	Phage tail sheath protein;Phage tail sheath protein	Wolbachia	Rickettsiales	Alphaproteobacteria	Scaffold3	225903-226228	Scaffold3:225903-226228	225903	226228	325	58	63	54	2	225903;226100	NA;NA	226059;226228	NA;NA	156;128	NA;NA	0;0	NA;NA	A0A369RI45;A0A369RIR3	94.2;95.2	NA;NA	25.3;10.2	NA;NA	1.3e-12;1.4e-11	NA;NA	ATG;GCT	NA;NA	AGC;TAG	NA;NA
GAGA-0365.Scaffold3.229018-237415	GAGA-0365	Tetraponera rufonigra	Pseudomyrmecinae	Minor capsid protein C, putative,Probable protease sohB,putative inner membrane peptidase,signal peptide peptidase SppA, 36K type,Peptidase family S49 (EC 3.4.21.-);Minor capsid protein C, putative,Probable protease sohB,putative inner membrane peptidase,signal peptide peptidase SppA, 36K type,Peptidase family S49 (EC 3.4.21.-);Portal protein;Portal protein;ParB domain-containing protein;Phage po…	Wolbachia	Rickettsiales	Alphaproteobacteria	Scaffold3	229018-237415	Scaffold3:229018-237415	229018	237415	8397	47	52	47	13	236624;236829;235397;234669;234075;235050;237229;236185;233497;231830;231384;232708;230218	236624;236829;235397;234669;234075;235050;237229;236185;233497;231830;231384;232708;230218	236824;237059;235702;234983;234395;235202;237415;236601;233889;232042;231740;232863;230427	236824;237059;235702;234983;234395;235202;237447;236601;233889;232042;231740;232863;230427	200;230;305;314;320;152;186;416;392;212;356;155;209	200;230;305;314;320;152;218;416;392;212;356;155;209	0;0;2;3;0;1;0;0;0;0;0;0;4	0;0;2;3;0;1;0;0;0;0;0;0;4	A0A098ASK9;A0A098ASK9;A0A178GVV6;A0A178GVV6;A0A1A9VKE5;A0A1V2N5B6;A0A369RH20;A0A369RIT7;A0A369RIY7;A0A5C0YL68;A0A5C0YL68;NA;NA	93.9;100.0;100.0;94.2;82.1;92.0;100.0;98.6;100.0;87.1;100.0;NA;NA	93.9;100.0;100.0;94.2;82.1;92.0;86.1;98.6;100.0;87.1;100.0;NA;NA	17.0;20.9;22.1;21.0;9.0;14.8;52.4;37.9;82.5;8.9;17.7;NA;NA	17.0;20.9;22.1;21.0;9.0;14.8;52.4;37.9;82.5;8.9;17.7;NA;NA	4.2e-21;1.4e-24;3.6e-44;1.7e-41;5.9e-34;1.6e-15;1.4e-16;2.1e-52;NA;2.5e-24;3.1e-27;NA;NA	4.2e-21;1.4e-24;3.6e-44;1.7e-41;5.9e-34;1.6e-15;1.4e-16;2.1e-52;NA;2.5e-24;3.1e-27;NA;NA	ATG;ATG;ATG;ATG;ATG;TTG;ATG;ATG;ATG;TTG;TTG;GTG;GTG	ATG;ATG;ATG;ATG;ATG;TTG;ATG;ATG;ATG;TTG;TTG;GTG;GTG	TGA;TAG;TGA;TAA;TGA;TGA;TAA;TAA;TGA;TAA;TAA;TAG;TAA	TGA;TAG;TGA;TAA;TGA;TGA;TAG;TAA;TGA;TAA;TAA;TAG;TAA
GAGA-0365.Scaffold3.249649-254044	GAGA-0365	Tetraponera rufonigra	Pseudomyrmecinae	Glyceraldehyde-3-phosphate dehydrogenase, type I (EC 1.2.1.-);Caudovirus prohead protease (Phage prohead protease, HK97 family) (EC 3.4.-.-);NA;NA;NA;NA;NA;NA	Wolbachia	Rickettsiales	Alphaproteobacteria	Scaffold3	249649-254044	Scaffold3:249649-254044	249649	254044	4395	55	90	32	7	249649;252686;251948;250499;253099;253934;252313;253641	249620;252313;251618;250499;253099;NA;251948;NA	250207;252838;252247;250578;253443;254044;252516;253766	250207;252516;251818;250578;253443;NA;252247;NA	558;152;299;79;344;110;203;125	587;203;200;79;344;NA;299;NA	2;1;0;2;7;0;0;1	2;0;0;2;7;NA;0;NA	A0A225X6Z3;Q4EB13;NA;NA;NA;NA;NA;NA	98.4;100.0;NA;NA;NA;NA;NA;NA	93.3;NA;100.0;NA;NA;NA;NA;NA	56.7;28.2;NA;NA;NA;NA;NA;NA	56.7;NA;26.1;NA;NA;NA;NA;NA	1.8e-51;3.2e-16;NA;NA;NA;NA;NA;NA	2.2e-51;NA;6.1e-20;NA;NA;NA;NA;NA	AAC;TTG;ATG;NA;ATG;CAA;ATG;ATG	ATG;ATG;ATG;NA;ATG;NA;ATG;NA	TAA;TGA;TAA;NA;TGA;TAG;TAG;TAG	TAA;TAG;TAA;NA;TGA;NA;TAA;NA
GAGA-0378.Scaffold29.1055831-1057476	GAGA-0378	Carebara altinodus	Myrmicinae	Uncharacterized protein;DUF1016 family protein;NA	Wolbachia	Rickettsiales	Alphaproteobacteria	Scaffold29	1055831-1057476	Scaffold29:1055831-1057476	1055831	1057476	1645	130	122	111	3	1055831;1056536;1057397	1056536;1056536;1056536	1055946;1057153;1057476	1057153;1057153;1057153	115;617;79	617;617;617	158;1234;3	1234;1234;1234	A0A178GRJ6;A0A6H2NU06;NA	97.3;97.6;NA	97.6;97.6;97.6	20.7;36.2;NA	36.2;36.2;36.2	2.7e-07;1.6e-90;NA	1.6e-90;NA;NA	ATG;ATG;GAA	ATG;NA;NA	TAA;TAA;TAG	TAA;NA;NA
GAGA-0382.Scaffold12.6451061-6451382	GAGA-0382	Carebara trechideros	Myrmicinae	hypothetical protein	Wolbachia	Rickettsiales	Alphaproteobacteria	Scaffold12	6451061-6451382	Scaffold12:6451061-6451382	6451061	6451382	321	22	22	22	1	6451061	NA	6451212	NA	151	NA	4	NA	NA	NA	NA	NA	NA	NA	NA	ATG	NA	TAG	NA
GAGA-0384.Scaffold5.8080128-8082309	GAGA-0384	Pheidole selathorax	Myrmicinae	Uncharacterized protein;NA;NA	Spiroplasma	Entoplasmatales	Mollicutes	Scaffold5	8080128-8082309	Scaffold5:8080128-8082309	8080128	8082309	2181	16	54	16	3	8080351;8081244;8082039	8080351;8081244;8082039	8080470;8081465;8082203	8080470;8081465;8082203	119;221;164	119;221;164	0;13;0	0;13;0	A0A345DN46;NA;NA	100.0;NA;NA	100.0;NA;NA	23.8;NA;NA	23.8;NA;NA	3.2e-08;NA;NA	3.2e-08;NA;NA	ATG;ATG;ATG	ATG;ATG;ATG	TGA;TAA;TAA	TGA;TAA;TAA
GAGA-0395.Scaffold9.6709399-6709523	GAGA-0395	Crematogaster osakensis	Myrmicinae	Co-chaperone Hsc20	Wolbachia	Rickettsiales	Alphaproteobacteria	Scaffold9	6709399-6709523	Scaffold9:6709399-6709523	6709399	6709523	124	52	52	52	1	6709399	6709413	6709523	6709547	124	134	204	204	B3CNS1	97.6	86.4	26.3	25	2.4000000000000001E-11	3.4000000000000001E-10	AAA	ATG	AAA	TAA
GAGA-0401.Scaffold1.1785775-1786661	GAGA-0401	Myrmica angulata	Myrmicinae	Ankyrin repeats family protein	Wolbachia	Rickettsiales	Alphaproteobacteria	Scaffold1	1785775-1786661	Scaffold1:1785775-1786661	1785775	1786661	886	16	18	16	1	1785775	1785762	1786661	1787661	886	1899	1483	2128	A0A5B9JVP8	100	99.5	84	68.2	NA	5.9000000000000001E-136	AAA	CGC	AGA	TGA
GAGA-0401.Scaffold102.52501-52756	GAGA-0401	Myrmica angulata	Myrmicinae	Transposase	Wolbachia	Rickettsiales	Alphaproteobacteria	Scaffold102	52501-52756	Scaffold102:52501-52756	52501	52756	255	27	22	15	1	52501	NA	52614	NA	113	NA	146	NA	A0A176Q8R4	100	NA	12.8	NA	8.5E-9	NA	TTA	NA	TAA	NA
GAGA-0401.Scaffold21.2900526-2906080	GAGA-0401	Myrmica angulata	Myrmicinae	Ankyrin repeat domain protein;Ankyrin repeat domain protein;Ankyrin repeat domain protein	Wolbachia	Rickettsiales	Alphaproteobacteria	Scaffold21	2900526-2906080	Scaffold21:2900526-2906080	2900526	2906080	5554	18	17	16	3	2900526;2901398;2900978	2900506;2901398;2900978	2900922;2906080;2901196	2900922;2907080;2901196	396;4682;218	416;5682;218	1460;6276;696	1603;6924;696	B6Y9L2;B6Y9L2;M9WQI6	85.6;99.9;86.1	81.9;94.0;86.1	2.4;32.8;2.6	2.4;37.8;2.6	1.1e-40;0.0e+00;4.8e-20	1.1e-40;0.0e+00;4.8e-20	ATG;AAA;TTG	ATG;TCA;TTG	CAT;TAA;TAA	TGA;TAA;TAA
GAGA-0401.Scaffold23.1566752-1569343	GAGA-0401	Myrmica angulata	Myrmicinae	Ankyrin repeat protein	Wolbachia	Rickettsiales	Alphaproteobacteria	Scaffold23	1566752-1569343	Scaffold23:1566752-1569343	1566752	1569343	2591	22	25	21	1	1566752	1566714	1569343	1569347	2591	2633	3823	3830	E9P653	98.7	97.5	89.7	90.1	NA	NA	ATA	ATG	TAG	TAA
GAGA-0401.Scaffold237.26242-28410	GAGA-0401	Myrmica angulata	Myrmicinae	Ankyrin repeat protein	Wolbachia	Rickettsiales	Alphaproteobacteria	Scaffold237	26242-28410	Scaffold237:26242-28410	26242	28410	2168	7	9	7	1	26242	26204	28410	28414	2168	2210	4192	4196	E9P653	99.7	98.2	79.900000000000006	80.2	NA	NA	ATA	ATG	TAG	TAG
GAGA-0401.Scaffold24.1252239-1253000	GAGA-0401	Myrmica angulata	Myrmicinae	Ankyrin repeats family protein	Wolbachia	Rickettsiales	Alphaproteobacteria	Scaffold24	1252239-1253000	Scaffold24:1252239-1253000	1252239	1253000	761	32	32	27	1	1252239	1252211	1253000	1254000	761	1789	2003	4664	A0A5B9JVP8	99.6	98	72.5	62.3	1.4E-83	1.0999999999999999E-229	TAT	TTA	AAG	TAG
GAGA-0401.Scaffold261.114242-123123	GAGA-0401	Myrmica angulata	Myrmicinae		Wolbachia	Rickettsiales	Alphaproteobacteria	Scaffold261	114242-123123	Scaffold261:114242-123123	114242	123123	8881	0	17	0			121826;117721;118288;116205;116562;116835;121290;116039;118908;122922;114400;115296;120527;119440	NA;NA;NA;NA;NA;NA;NA;NA;NA;NA;NA;NA;NA;NA	122455;118038;118986;116471;116795;117530;121619;116224;119288;123137;114897;115772;120712;119622	NA;NA;NA;NA;NA;NA;NA;NA;NA;NA;NA;NA;NA;NA	629;317;698;266;233;695;329;185;380;215;497;476;185;182	NA;NA;NA;NA;NA;NA;NA;NA;NA;NA;NA;NA;NA;NA	1803;166;1820;233;235;91;50;100;1962;1401;565;82;77;530	NA;NA;NA;NA;NA;NA;NA;NA;NA;NA;NA;NA;NA;NA	NA;NA;NA;NA;NA;NA;NA;NA;NA;NA;NA;NA;NA;NA	85.2;NA;89.2;97.7;97.4;92.2;NA;96.7;84.1;94.4;98.8;78.5;NA;NA	NA;NA;NA;NA;NA;NA;NA;NA;NA;NA;NA;NA;NA;NA	39.9;NA;8.0;6.4;13.6;6.4;NA;4.5;4.0;67.7;79.0;51.9;NA;NA	NA;NA;NA;NA;NA;NA;NA;NA;NA;NA;NA;NA;NA;NA	8.6e-79;NA;4.2e-70;8.8e-14;8.5e-22;5.4e-25;NA;1.7e-09;1.1e-32;4.2e-24;NA;2.3e-22;NA;NA	NA;NA;NA;NA;NA;NA;NA;NA;NA;NA;NA;NA;NA;NA	ATG;ATG;ATG;ATG;ATG;TTG;GTG;GTG;TTG;ATG;ATG;TTG;TTG;ATG	NA;NA;NA;NA;NA;NA;NA;NA;NA;NA;NA;NA;NA;NA	TAA;TAA;TAG;TAG;TAA;TAG;TGA;TGA;TAA;TAA;TAA;TAA;TAA;TAG
GAGA-0401.Scaffold261.116822-119233	GAGA-0401	Myrmica angulata	Myrmicinae	OTU domain-containing protein;Tetratricopeptide repeat protein;Ankyrin and tpr repeat domain protein;NA	Wolbachia	Rickettsiales	Alphaproteobacteria	Scaffold261	116822-119233	Scaffold261:116822-119233	116822	119233	2411	19	20	19	4	116822;118288;118908;117721	116835;118288;118908;117721	117530;118986;119233;118038	117530;118986;119288;118038	708;698;325;317	695;698;380;317	119;1820;1845;166	103;1820;1962;166	A0A218KPU2;A0A6M5ELT9;B3CPL2;NA	91.1;89.2;98.1;NA	92.2;89.2;84.1;NA	6.4;8.0;4.0;NA	6.4;8.0;4.0;NA	6.6e-26;4.2e-70;1.1e-32;NA	5.4e-25;4.2e-70;1.1e-32;NA	AAT;ATG;TTG;ATG	TTG;ATG;TTG;ATG	TAG;TAG;TAA;TAA	TAG;TAG;TAA;TAA
GAGA-0401.Scaffold261.137722-139090	GAGA-0401	Myrmica angulata	Myrmicinae	Transposase IS116/IS110/IS902 family protein;NA	Wolbachia	Rickettsiales	Alphaproteobacteria	Scaffold261	137722-139090	Scaffold261:137722-139090	137722	139090	1368	15	11	10	2	137763;138380	137763;138380	138056;138598	138056;138598	293;218	293;218	95;26	95;26	A0A369RIP2;NA	93.8;NA	93.8;NA	27.1;NA	27.1;NA	4.3e-37;NA	4.3e-37;NA	ATG;ATG	ATG;ATG	TGA;TGA	TGA;TGA
GAGA-0401.Scaffold261.159454-166733	GAGA-0401	Myrmica angulata	Myrmicinae	Ankyrin repeat domain protein	Wolbachia	Rickettsiales	Alphaproteobacteria	Scaffold261	159454-166733	Scaffold261:159454-166733	159454	166733	7279	23	22	22	1	159454	159420	166475	166475	7021	7055	3512	3535	C0R3E9	100	99.8	94.5	94.9	NA	NA	CTA	TTG	TAA	TAA
GAGA-0401.Scaffold31.129248-129500	GAGA-0401	Myrmica angulata	Myrmicinae	Uncharacterized protein	Wolbachia	Rickettsiales	Alphaproteobacteria	Scaffold31	129248-129500	Scaffold31:129248-129500	129248	129500	252	13	11	9	1	129248	129251	129500	129637	252	386	0	0	B3CPR6	100	100	28.1	42.6	3.6000000000000003E-36	4.2999999999999999E-58	TAC	GTG	CAA	TAA
GAGA-0401.Scaffold317.40057-44029	GAGA-0401	Myrmica angulata	Myrmicinae	Transposase;DNA repair protein RadC;Helix-turn-helix transcriptional regulator;ISSod10, transposase OrfA, putative (Winged helix-turn helix family protein);NA	Wolbachia	Rickettsiales	Alphaproteobacteria	Scaffold317	40057-44029	Scaffold317:40057-44029	40057	44029	3972	52	38	38	5	40057;43151;41035;43618;42086	39996;43151;41035;NA;NA	40883;43573;41889;44029;42208	40883;43573;41889;NA;NA	826;422;854;411;122	887;422;854;NA;NA	5381;102;97;183;6	7994;102;97;NA;NA	A0A178GWB3;A0A6M5E574;A0A7G5CAE0;Q4EAU6;NA	100.0;91.4;100.0;100.0;NA	100.0;91.4;100.0;NA;NA	87.4;57.7;93.0;84.6;NA	90.2;57.7;93.0;NA;NA	NA;1.7e-62;NA;NA;NA	NA;1.7e-62;NA;NA;NA	ATG;GTG;TTG;ATG;ATG	ATG;GTG;TTG;NA;NA	AGG;TAA;TAA;TTT;TGA	TGA;TAA;TAA;NA;NA
GAGA-0401.Scaffold317.47703-50709	GAGA-0401	Myrmica angulata	Myrmicinae	Transposase;Transposase (Fragment);DNA repair protein RadC;Helix-turn-helix transcriptional regulator;Helix-turn-helix transcriptional regulator	Wolbachia	Rickettsiales	Alphaproteobacteria	Scaffold317	47703-50709	Scaffold317:47703-50709	47703	50709	3006	41	16	15	5	47703;50472;49739;48686;49165	47642;50293;49739;48686;49165	48286;50709;50248;49021;49542	48286;50553;50248;49021;49542	583;237;509;335;377	644;260;509;335;377	8396;17;60;28;54	8423;12;60;28;54	A0A178GWB3;A0A178GWV8;A0A6M5E574;A0A7G5CAE0;A0A7G5CAE0	100.0;87.3;92.9;95.5;100.0	100.0;83.7;92.9;95.5;100.0	60.6;44.8;70.3;35.1;39.7	63.7;44.4;70.3;35.1;39.7	1.2e-83;2.2e-28;4.6e-76;6.5e-46;3.5e-47	9.5e-84;1.9e-29;4.6e-76;6.5e-46;3.5e-47	ATG;GTG;ATG;TTG;TTG	ATG;ATG;ATG;TTG;TTG	AGG;TTT;TAA;TAG;TAA	TGA;TAA;TAA;TAG;TAA
GAGA-0401.Scaffold337.99554-102454	GAGA-0401	Myrmica angulata	Myrmicinae	Ankyrin repeat protein	Wolbachia	Rickettsiales	Alphaproteobacteria	Scaffold337	99554-102454	Scaffold337:99554-102454	99554	102454	2900	37	42	37	1	99554	99516	102454	102458	2900	2942	14726	14820	E9P653	100	99	98.1	98.5	NA	NA	ATA	ATG	TAG	TAG
GAGA-0401.Scaffold42.1733251-1736037	GAGA-0401	Myrmica angulata	Myrmicinae	Ankyrin repeat protein	Wolbachia	Rickettsiales	Alphaproteobacteria	Scaffold42	1733251-1736037	Scaffold42:1733251-1736037	1733251	1736037	2786	25	16	10	1	1733251	1733213	1736037	1736041	2786	2828	3884	3913	E9P653	100	98.9	98.1	98.5	NA	NA	ATA	ATG	TAG	TAG
GAGA-0401.Scaffold42.878042-880857	GAGA-0401	Myrmica angulata	Myrmicinae	Ankyrin repeat protein;Ankyrin repeat protein;NA	Wolbachia	Rickettsiales	Alphaproteobacteria	Scaffold42	878042-880857	Scaffold42:878042-880857	878042	880857	2815	30	30	29	3	878042;880342;880736	878004;880342;NA	880367;880785;880857	880367;880785;NA	2325;443;121	2363;443;NA	1628;194;0	1628;194;NA	E9P653;E9P653;NA	99.5;94.6;NA	98.3;94.6;NA	77.0;14.5;NA	77.3;14.5;NA	NA;6.1e-36;NA	NA;6.1e-36;NA	ATG;TTG;ATA	ATG;TTG;NA	TAG;TAG;TGA	TAG;TAG;NA
GAGA-0401.Scaffold504.122114-122289	GAGA-0401	Myrmica angulata	Myrmicinae	hypothetical protein	Wolbachia	Rickettsiales	Alphaproteobacteria	Scaffold504	122114-122289	Scaffold504:122114-122289	122114	122289	175	54	54	54	1	122114	122242	122186	122367	72	125	0	0	NA	NA	NA	NA	NA	NA	NA	ATA	ATG	TAA	TAA
GAGA-0401.Scaffold523.45005-47412	GAGA-0401	Myrmica angulata	Myrmicinae	Ankyrin repeat protein	Wolbachia	Rickettsiales	Alphaproteobacteria	Scaffold523	45005-47412	Scaffold523:45005-47412	45005	47412	2407	17	17	16	1	45005	44621	47412	47449	2407	2828	4565	4655	E9P653	100	98.7	84.1	98.3	NA	NA	AAT	ATG	AGC	TAG
GAGA-0401.Scaffold53.76502-76628	GAGA-0401	Myrmica angulata	Myrmicinae	Phosphoribosylformylglycinamidine cyclo-ligase (EC 6.3.3.1) (AIR synthase) (AIRS) (Phosphoribosyl-aminoimidazole synthetase)	Paraburkholderia	Burkholderiales	Betaproteobacteria	Scaffold53	76502-76628	Scaffold53:76502-76628	76502	76628	126	33	29	25	1	76502	76431	76628	76604	126	173	3139	4382	A0A1A9NKN6	97.6	98.2	11.7	15.7	6.2000000000000002E-12	7.0000000000000003E-19	ATC	GTG	TCG	TGA
GAGA-0401.Scaffold625.37488-38141	GAGA-0401	Myrmica angulata	Myrmicinae	Uncharacterized protein;Uncharacterized protein	Wolbachia	Rickettsiales	Alphaproteobacteria	Scaffold625	37488-38141	Scaffold625:37488-38141	37488	38141	653	16	15	15	2	37909;37488	37909;37635	38141;37829	38166;37829	232;341	257;194	10;10	10;10	A0A369RG29;B6Y7H1	98.7;100.0	94.1;100.0	84.2;36.9	89.5;20.9	NA;5.8e-55	NA;3.6e-28	ATG;CGT	ATG;TTG	AAA;TGA	TGA;TGA
GAGA-0401.Scaffold76.21746-28588	GAGA-0401	Myrmica angulata	Myrmicinae	Ankyrin repeat domain protein;Ankyrin repeat domain protein	Wolbachia	Rickettsiales	Alphaproteobacteria	Scaffold76	21746-28588	Scaffold76:21746-28588	21746	28588	6842	19	20	8	2	21746;26621	20747;26621	26376;26848	26376;26848	4630;227	5629;227	920;62	1019;62	B6Y9L2;M9WQI6	99.9;94.7	99.9;94.7	31.5;2.9	38.1;2.9	0.0e+00;5.7e-26	0.0e+00;5.7e-26	AAA;GTG	TTA;GTG	TAA;TAA	TAA;TAA
GAGA-0401.Scaffold9.1185183-1189255	GAGA-0401	Myrmica angulata	Myrmicinae	Ankyrin repeat domain protein	Wolbachia	Rickettsiales	Alphaproteobacteria	Scaffold9	1185183-1189255	Scaffold9:1185183-1189255	1185183	1189255	4072	32	30	25	1	1185183	1184184	1189255	1190255	4072	6071	5243	11375	C0R3E9	16	26.4	8.8000000000000007	22.3	8.4000000000000001E-80	9.9999999999999998E-141	AAG	CTC	AAT	GCA
GAGA-0401.Scaffold9.1189846-1191645	GAGA-0401	Myrmica angulata	Myrmicinae	Uncharacterized protein;Uncharacterized protein;Transposase IS116/IS110/IS902 family protein;Ankyrin repeat domain protein;Uncharacterized protein	Wolbachia	Rickettsiales	Alphaproteobacteria	Scaffold9	1189846-1191645	Scaffold9:1189846-1191645	1189846	1191645	1799	10	28	5	5	1190501;1191039;1191474;1189846;1190933	1190501;1191039;1191474;1188847;NA	1190704;1191383;1191645;1190414;1191094	1190704;1191383;1191617;1190414;NA	203;344;171;568;161	203;344;143;1567;NA	423;586;729;522;143	423;712;668;2728;NA	A0A060Q487;A0A060Q4T2;A0A369RKS5;C0R3E9;Q73G30	98.5;100.0;76.8;98.9;56.6	98.5;100.0;91.5;40.5;NA	26.4;37.7;14.7;7.6;11.7	26.4;37.7;14.7;8.6;NA	7.2e-13;9.0e-51;1.2e-10;4.2e-75;1.2e-07	7.2e-13;9.0e-51;1.2e-10;1.7e-77;NA	ATG;ATG;GGG;AAC;ATG	ATG;ATG;ATG;ATG;NA	TGA;TAA;TAA;TAA;TAA	TGA;TAA;TAA;TAA;NA
GAGA-0401.Scaffold92.601546-604786	GAGA-0401	Myrmica angulata	Myrmicinae	Ankyrin repeat protein;Ankyrin 3 (Ankyrin repeat family protein)	Wolbachia	Rickettsiales	Alphaproteobacteria	Scaffold92	601546-604786	Scaffold92:601546-604786	601546	604786	3240	10	6	6	2	603108;601546	603108;600547	604786;602449	604823;602449	1678;903	1715;1902	3872;1497	3876;5526	E9P653;Q4EBI3	100.0;94.7	98.4;95.9	61.8;45.1	62.2;92.9	7.4e-204;3.8e-79	3.4e-204;NA	GTG;AGC	GTG;TCG	AGC;TAA	TAG;TAA
GAGA-0405.Scaffold7.485313-485463	GAGA-0405	Tetramorium polymorphum	Myrmicinae	hypothetical protein	Wolbachia	Rickettsiales	Alphaproteobacteria	Scaffold7	485313-485463	Scaffold7:485313-485463	485313	485463	150	59	65	59	1	485313	NA	485463	NA	150	NA	21	NA	NA	NA	NA	NA	NA	NA	NA	GCC	NA	GCA	NA
GAGA-0407.Scaffold17.737281-738661	GAGA-0407	Kartidris nyos	Myrmicinae	DUF1016 family protein;NA	Wolbachia	Rickettsiales	Alphaproteobacteria	Scaffold17	737281-738661	Scaffold17:737281-738661	737281	738661	1380	51	56	47	2	738017;737774	738017;737774	738634;737896	738634;737896	617;122	617;122	545;70	545;70	A0A6H2NU06;NA	96.6;NA	96.6;NA	35.8;NA	35.8;NA	1.1e-91;NA	1.1e-91;NA	ATG;GTG	ATG;GTG	TGA;TAG	TGA;TAG
GAGA-0407.Scaffold2.1417501-1424000	GAGA-0407	Kartidris nyos	Myrmicinae	Tetratricopeptide repeat protein	Wolbachia	Rickettsiales	Alphaproteobacteria	Scaffold2	1417501-1424000	Scaffold2:1417501-1424000	1417501	1424000	6499	102	91	81	1	1417501	1416666	1424000	1424156	6499	7490	1247	1439	A0A4Y6UMV0	90.2	99.6	97.4	99.3	NA	NA	TGG	GTG	ACA	TAA
GAGA-0407.Scaffold2.3931220-3938696	GAGA-0407	Kartidris nyos	Myrmicinae	Ankyrin repeat domain protein	Wolbachia	Rickettsiales	Alphaproteobacteria	Scaffold2	3931220-3938696	Scaffold2:3931220-3938696	3931220	3938696	7476	84	96	59	1	3931327	3931327	3938661	3938661	7334	7334	2246	2246	C0R3E9	99.9	99.9	98.4	98.4	NA	NA	ATG	ATG	TAA	TAA
GAGA-0407.Scaffold37.287827-292621	GAGA-0407	Kartidris nyos	Myrmicinae	Orotate phosphoribosyltransferase (OPRT) (OPRTase) (EC 2.4.2.10);Dihydroorotate dehydrogenase (DHOD) (DHODase) (DHOdehase) (EC 1.3.-.-);Orotidine 5'-phosphate decarboxylase (EC 4.1.1.23);Uncharacterized protein	Spiroplasma	Entoplasmatales	Mollicutes	Scaffold37	287827-292621	Scaffold37:287827-292621	287827	292621	4794	62	45	27	4	289031;291263;290547;287972	289031;291263;290547;287972	289402;291496;291032;288274	289402;291496;291032;288274	371;233;485;302	371;233;485;302	0;34;0;0	0;34;0;0	A0A0H3XH96;A0A0H3XJH9;A0A0H3XM89;A0A345DNP3	98.4;100.0;100.0;100.0	98.4;100.0;100.0;100.0	59.2;25.4;69.1;27.3	59.2;25.4;69.1;27.3	5.1e-38;6.5e-22;1.5e-53;3.2e-08	5.1e-38;6.5e-22;1.5e-53;3.2e-08	ATG;ATG;TTG;ATG	ATG;ATG;TTG;ATG	TAA;TAA;TAG;TGA	TAA;TAA;TAG;TGA
GAGA-0407.Scaffold37.289040-289423	GAGA-0407	Kartidris nyos	Myrmicinae	Orotate phosphoribosyltransferase (OPRT) (OPRTase) (EC 2.4.2.10)	Spiroplasma	Entoplasmatales	Mollicutes	Scaffold37	289040-289423	Scaffold37:289040-289423	289040	289423	383	100	65	47	1	289040	289031	289423	289402	383	371	0	0	A0A0H3XH96	100	98.4	62.6	59.2	1.3E-41	5.1000000000000003E-38	CAT	ATG	AAT	TAA
GAGA-0413.Scaffold21.374764-380219	GAGA-0413	Messor capitatus	Myrmicinae	Ankyrin repeat domain protein	Wolbachia	Rickettsiales	Alphaproteobacteria	Scaffold21	374764-380219	Scaffold21:374764-380219	374764	380219	5455	36	26	15	1	374764	374678	380131	380131	5367	5453	504	521	B3CPR7	55.4	55	38.4	38.5	5.1E-165	1.7999999999999999E-165	ACC	ATG	TGA	TGA
GAGA-0413.Scaffold5.1186853-1190780	GAGA-0413	Messor capitatus	Myrmicinae	Ankyrin repeat domain protein;Ankyrin repeat domain protein;Ankyrin repeat domain protein	Wolbachia	Rickettsiales	Alphaproteobacteria	Scaffold5	1186853-1190780	Scaffold5:1186853-1190780	1186853	1190780	3927	54	52	51	3	1188970;1189566;1188675	1188970;1189566;1188675	1189338;1190252;1188977	1189338;1190252;1188977	368;686;302	368;686;302	1142;1613;631	1142;1613;631	C0R3E9;C0R3E9;C0R3E9	84.4;27.6;97.0	84.4;27.6;97.0	89.7;2.5;3.9	89.7;2.5;3.9	NA;4.6e-21;2.1e-36	NA;4.6e-21;2.1e-36	GTG;TTG;TTG	GTG;TTG;TTG	TGA;TGA;TGA	TGA;TGA;TGA
GAGA-0413.Scaffold5.1188536-1189319	GAGA-0413	Messor capitatus	Myrmicinae	Ankyrin repeat domain protein;Ankyrin repeat domain protein	Wolbachia	Rickettsiales	Alphaproteobacteria	Scaffold5	1188536-1189319	Scaffold5:1188536-1189319	1188536	1189319	783	52	59	45	2	1188675;1188970	1188675;1188970	1188977;1189319	1188977;1189338	302;349	302;368	631;1096	631;1142	C0R3E9;C0R3E9	97.0;89.6	97.0;84.4	3.9;89.7	3.9;89.7	2.1e-36;NA	2.1e-36;NA	TTG;AAA	TTG;Ankyrin_repeat_protein	TGA;TGA	TGA;GTG
GAGA-0454.Scaffold251.155922-156404	GAGA-0454	Solenopsis fugax	Myrmicinae	OTU domain-containing protein	Wolbachia	Rickettsiales	Alphaproteobacteria	Scaffold251	155922-156404	Scaffold251:155922-156404	155922	156404	482	51	44	43	1	155922	154923	156349	156349	427	1426	378	427	A0A218KPU2	98.6	84	4.4000000000000004	65.099999999999994	7.6000000000000004E-39	1.4000000000000001E-112	ATG	ATG	AGA	AAA
GAGA-0454.Scaffold4.7062408-7062705	GAGA-0454	Solenopsis fugax	Myrmicinae	Ankyrin 3 (Ankyrin repeat family protein)	Wolbachia	Rickettsiales	Alphaproteobacteria	Scaffold4	7062408-7062705	Scaffold4:7062408-7062705	7062408	7062705	297	57	57	56	1	7062408	7062304	7062705	7062741	297	437	29	30	Q4EBI3	100	68.3	16	16	1.7000000000000001E-38	7.2999999999999997E-37	GAA	ATG	ATA	TAA
GAGA-0463.Scaffold1.23848817-23857406	GAGA-0463	Formicoxenus nitidulus	Myrmicinae	Ankyrin repeat domain protein;Ankyrin repeat domain protein	Wolbachia	Rickettsiales	Alphaproteobacteria	Scaffold1	23848817-23857406	Scaffold1:23848817-23857406	23848817	23857406	8589	42	42	24	2	23855941;23848978	23855940;23848977	23856135;23855502	23856134;23855501	194;6524	194;6524	238;2434	238;2434	C0R3E9;C0R3E9	100.0;99.7	100.0;99.7	2.6;88.6	2.6;88.6	8.9e-19;NA	8.9e-19;NA	TTG;ATG	TTG;ATG	TAA;TAG	TAA;TAG
GAGA-0463.Scaffold1.23868002-23874699	GAGA-0463	Formicoxenus nitidulus	Myrmicinae	Ankyrin repeat domain protein	Wolbachia	Rickettsiales	Alphaproteobacteria	Scaffold1	23868002-23874699	Scaffold1:23868002-23874699	23868002	23874699	6697	38	29	17	1	23868003	23867346	23874623	23874623	6620	7277	4922	5128	C0R3E9	100	100	89	97.9	NA	NA	GTG	ATG	TAA	TAA
GAGA-0463.Scaffold1.23889060-23898427	GAGA-0463	Formicoxenus nitidulus	Myrmicinae	Ankyrin repeat domain protein;Ankyrin repeat domain protein;Ankyrin repeat domain protein;NA	Wolbachia;Ehrlichia	Rickettsiales	Alphaproteobacteria	Scaffold1	23889060-23898427	Scaffold1:23889060-23898427	23889060	23898427	9367	42	34	18	4	23892387;23889060;23893538;23896590	23892387;23889030;23893538;23896590	23893433;23892311;23895370;23896823	23893433;23892311;23895370;23896823	1046;3251;1832;233	1046;3281;1832;233	69;373;817;193	69;373;817;193	C0R3E9;C0R3E9;C0R3E9;NA	87.1;100.0;100.0;NA	87.1;99.1;100.0;NA	12.2;43.6;24.7;NA	12.2;43.6;24.7;NA	3.1e-118;0.0e+00;2.2e-249;NA	3.1e-118;0.0e+00;2.2e-249;NA	GTG;GAG;GTG;ATG	GTG;GTG;GTG;ATG	TAA;TAA;TAA;TAG	TAA;TAA;TAA;TAG
GAGA-0463.Scaffold1.23909567-23917895	GAGA-0463	Formicoxenus nitidulus	Myrmicinae	Ankyrin repeat domain protein	Wolbachia	Rickettsiales	Alphaproteobacteria	Scaffold1	23909567-23917895	Scaffold1:23909567-23917895	23909567	23917895	8328	43	43	22	1	23909567	23909550	23916970	23916971	7403	7421	4315	4317	C0R3E9	100	99.8	97	97	NA	NA	GAA	ATG	TAG	TAG
GAGA-0463.Scaffold1.24255586-24266521	GAGA-0463	Formicoxenus nitidulus	Myrmicinae	Ankyrin repeat domain protein;NA	Wolbachia	Rickettsiales	Alphaproteobacteria	Scaffold1	24255586-24266521	Scaffold1:24255586-24266521	24255586	24266521	10935	42	38	13	2	24259080;24257641	24259080;24257641	24266357;24257799	24266357;24257799	7277;158	7277;158	2481;158	2481;158	C0R3E9;NA	99.9;NA	99.9;NA	97.8;NA	97.8;NA	NA;NA	NA;NA	ATG;ATG	ATG;ATG	TAA;TAA	TAA;TAA
GAGA-0463.Scaffold11.1826129-1833106	GAGA-0463	Formicoxenus nitidulus	Myrmicinae	Uncharacterized protein;Deleted.	Ehrlichia;Wolbachia	Rickettsiales	Alphaproteobacteria	Scaffold11	1826129-1833106	Scaffold11:1826129-1833106	1826129	1833106	6977	26	46	10	2	1830581;1829920	1830581;1829920	1833106;1830237	1833058;1830237	2525;317	2477;317	53;10	53;10	A0A176Q8J2;A0A1L9ASN4	97.9;98.1	97.7;98.1	98.5;24.5	96.5;24.5	NA;2.9e-22	NA;2.9e-22	ATA;ATG	ATG;ATG	TAA;TAA	TAA;TAA
GAGA-0463.Scaffold25.3133505-3134642	GAGA-0463	Formicoxenus nitidulus	Myrmicinae	D-alanine--D-alanine ligase (EC 6.3.2.4) (D-Ala-D-Ala ligase) (D-alanylalanine synthetase)	Sodalis	Enterobacterales	Gammaproteobacteria	Scaffold25	3133505-3134642	Scaffold25:3133505-3134642	3133505	3134642	1137	33	33	28	1	3133505	3133690	3134642	3134643	1137	953	4514	4302	W0HVG4	97.4	99.7	99.2	85.1	NA	NA	TTT	ATG	CTA	TAA
GAGA-0463.Scaffold48.1375518-1376844	GAGA-0463	Formicoxenus nitidulus	Myrmicinae	Succinate dehydrogenase cytochrome b556 subunit;NA	Wolbachia	Rickettsiales	Alphaproteobacteria	Scaffold48	1375518-1376844	Scaffold48:1375518-1376844	1375518	1376844	1326	43	47	39	2	1375946;1376358	1375946;1376358	1376254;1376844	1376254;1376841	308;486	308;483	71;148	71;147	A0A060PY40;NA	100.0;NA	100.0;NA	81.6;NA	81.6;NA	NA;NA	NA;NA	ATG;NA	ATG;NA	TAA;NA	TAA;NA
GAGA-0463.Scaffold48.1396399-1401208	GAGA-0463	Formicoxenus nitidulus	Myrmicinae	Uncharacterized protein;Uncharacterized protein (Fragment);IS630 family transposase;IS630 family transposase;NA;NA	Wolbachia;Candidatus_Paracedi;Rickettsia_conorii	Rickettsiales	Alphaproteobacteria	Scaffold48	1396399-1401208	Scaffold48:1396399-1401208	1396399	1401208	4809	57	52	43	6	1397357;1398375;1400453;1398974;1396993;1401117	NA;1398375;1400453;1398974;1396993;NA	1397479;1398587;1400932;1399522;1397926;1401208	NA;1398587;1400932;1399522;1397926;NA	122;212;479;548;933;91	NA;212;479;548;933;NA	0;9;89;15;18;10	NA;9;89;15;18;NA	A0A098ASR4;A0A178GWF4;A0A6I6CDZ9;A0A6I6CDZ9;NA;NA	100.0;72.9;91.2;91.2;NA;NA	NA;72.9;91.2;91.2;NA;NA	100.0;31.3;43.5;49.8;NA;NA	NA;31.3;43.5;49.8;NA;NA	NA;2.7e-15;2.9e-54;1.5e-61;NA;NA	NA;2.7e-15;2.9e-54;1.5e-61;NA;NA	ATG;ATG;ATG;ATG;NA;GAC	NA;ATG;ATG;ATG;NA;NA	TAA;TAA;TAA;TAA;NA;TAA	NA;TAA;TAA;TAA;NA;NA
GAGA-0463.Scaffold48.1408593-1411789	GAGA-0463	Formicoxenus nitidulus	Myrmicinae	Uncharacterized protein;Ankyrin repeat domain protein;Ankyrin repeat domain protein;Ankyrin repeat domain protein;Ankyrin repeat domain protein;Ankyrin repeat domain protein;Ankyrin repeat domain protein;NA;NA	Wolbachia	Rickettsiales	Alphaproteobacteria	Scaffold48	1408593-1411789	Scaffold48:1408593-1411789	1408593	1411789	3196	73	31	24	9	1411603;1410884;1408693;1409461;1410163;1408914;1410402;1411414;1408593	1411603;1410884;1408693;1409506;1410163;1408914;1410402;NA;NA	1411789;1411345;1408899;1410102;1410330;1409549;1410761;1411539;1408696	1411818;1411345;1408899;1410102;1410330;1409549;1410761;NA;NA	186;461;206;641;167;635;359;125;103	215;461;206;596;167;635;359;NA;NA	388;1101;394;1739;323;595;280;491;72	408;1149;396;1715;323;613;280;NA;NA	A0A4Y6ULF4;B6Y9L2;B6Y9L2;B6Y9L2;M9WQI6;M9WQI6;M9WQI6;NA;NA	98.4;100.0;98.5;95.3;96.4;97.6;95.8;NA;NA	85.9;100.0;98.5;93.4;96.4;97.6;95.8;NA;NA	1.4;3.2;1.4;4.1;2.2;8.5;4.7;NA;NA	1.4;3.2;1.4;3.9;2.2;8.5;4.7;NA;NA	6.2e-20;6.5e-62;3.8e-25;6.1e-59;2.4e-16;8.0e-72;1.7e-49;NA;NA	6.2e-20;6.5e-62;3.8e-25;1.1e-58;2.4e-16;8.0e-72;1.7e-49;NA;NA	GTG;TTG;TTG;GTG;ATG;TTG;ATG;GTG;CAG	GTG;TTG;TTG;ATG;ATG;TTG;ATG;NA;NA	AGA;TAG;TAG;TAA;TAA;TAA;TAG;TAA;TGA	TAA;TAG;TAG;TAA;TAA;TAA;TAG;NA;NA
GAGA-0463.Scaffold5.10066752-10067894	GAGA-0463	Formicoxenus nitidulus	Myrmicinae	DUF1016 family protein	Wolbachia	Rickettsiales	Alphaproteobacteria	Scaffold5	10066752-10067894	Scaffold5:10066752-10067894	10066752	10067894	1142	73	74	72	1	10067288	10067288	10067894	10067911	606	623	2201	2232	A0A6H2NU06	98.5	96.1	36	36	5.2000000000000003E-91	5.5999999999999998E-91	ATG	ATG	CAA	TAA
GAGA-0463.Scaffold87.542630-542813	GAGA-0463	Formicoxenus nitidulus	Myrmicinae	AAA-ATPase_like domain-containing protein	Cardinium	Sphingobacteriales	Sphingobacteriia	Scaffold87	542630-542813	Scaffold87:542630-542813	542630	542813	183	40	40	40	1	542630	542591	542813	542935	183	344	1	2	A0A556QWV4	98.4	89.5	10.8	16.7	4.2999999999999998E-21	2.9E-33	TAG	TTG	ATA	TGA
GAGA-0485.Scaffold19.2863851-2864103	GAGA-0485	Formica sanguinea	Formicinae	Ribosomal RNA small subunit methyltransferase A (EC 2.1.1.182) (16S rRNA (adenine(1518)-N(6)/adenine(1519)-N(6))-dimethyltransferase) (16S rRNA dimethyladenosine transferase) (16S rRNA dimethylase) (S-adenosylmethionine-6-N', N'-adenosyl(rRNA) dimethyltransferase)	Spiroplasma	Entoplasmatales	Mollicutes	Scaffold19	2863851-2864103	Scaffold19:2863851-2864103	2863851	2864103	252	43	43	43	1	2863851	2863866	2864103	2864138	252	272	0	0	W0GSI6	98.8	93.3	29.5	32.4	1.8999999999999999E-29	3.0999999999999998E-27	TCA	ATG	AAA	TAA
GAGA-0485.Scaffold3.1952333-1953120	GAGA-0485	Formica sanguinea	Formicinae	Uncharacterized protein;NA	Wolbachia	Rickettsiales	Alphaproteobacteria	Scaffold3	1952333-1953120	Scaffold3:1952333-1953120	1952333	1953120	787	78	73	69	2	1952333;1953061	1952533;NA	1952928;1953120	1952928;NA	595;59	395;NA	20;1	20;NA	Q4EAJ0;NA	97.5;NA	96.9;NA	76.2;NA	52.4;NA	NA;NA	1.4e-51;NA	AAA;ACC	TTG;NA	TAG;TGA	TAG;NA
GAGA-0485.Scaffold4.8837683-8839152	GAGA-0485	Formica sanguinea	Formicinae	Cyclopropane fatty acyl phospholipid synthase (EC 2.1.1.79);Cyclopropane fatty acyl phospholipid synthase (EC 2.1.1.79)	Sodalis	Enterobacterales	Gammaproteobacteria	Scaffold4	8837683-8839152	Scaffold4:8837683-8839152	8837683	8839152	1469	74	80	63	2	8838583;8837745	8838661;8837745	8839089;8838659	8838840;8838659	506;914	179;914	2;0	0;0	A0A151ULI1;A0A151ULI1	91.7;96.7	NA;96.7	40.5;77.0	NA;77.0	1.2e-63;NA	NA;NA	ATG;ATG	ATG;ATG	TGA;TGA	TAA;TGA
GAGA-0485.Scaffold4.8848842-8849572	GAGA-0485	Formica sanguinea	Formicinae	Cyclopropane fatty acyl phospholipid synthase (EC 2.1.1.79)	Yersinia ruckeri	Enterobacterales	Gammaproteobacteria	Scaffold4	8848842-8849572	Scaffold4:8848842-8849572	8848842	8849572	730	43	41	41	1	8848842	8848619	8849572	8848918	730	299	6	6	A0A151ULI1	94.7	NA	60.3	NA	1.2000000000000001E-105	NA	ATT	ATG	CAG	TAA
GAGA-0485.Scaffold6.5437357-5438799	GAGA-0485	Formica sanguinea	Formicinae	Cyclopropane fatty acyl phospholipid synthase (EC 2.1.1.79)	Serratia	Enterobacterales	Gammaproteobacteria	Scaffold6	5437357-5438799	Scaffold6:5437357-5438799	5437357	5438799	1442	67	70	62	1	5437366	5437366	5438514	5438514	1148	1148	4425	4425	A0A151ULI1	100	100	100	100	NA	NA	ATG	ATG	TGA	TGA
GAGA-0491.Scaffold10.2289505-2289724	GAGA-0491	Lasius fuliginosus s2	Formicinae	hypothetical protein	Wolbachia	Rickettsiales	Alphaproteobacteria	Scaffold10	2289505-2289724	Scaffold10:2289505-2289724	2289505	2289724	219	41	39	39	1	2289505	2289458	2289655	2289655	150	197	0	0	NA	NA	NA	NA	NA	NA	NA	TAA	ATG	TGA	TGA
GAGA-0491.Scaffold103.199829-201344	GAGA-0491	Lasius fuliginosus s2	Formicinae	Ankyrin repeat protein;Ankyrin 3 (Ankyrin repeat family protein)	Wolbachia	Rickettsiales	Alphaproteobacteria	Scaffold103	199829-201344	Scaffold103:199829-201344	199829	201344	1515	51	51	40	2	199829;200486	200053;200486	200562;201148	200562;201148	733;662	509;662	21;64	14;64	E9P653;Q4EBI3	92.6;92.7	89.3;92.7	20.5;31.9	24.5;31.9	2.8e-67;4.0e-48	1.6e-36;4.0e-48	TTC;ATG	ATG;ATG	TGA;TAA	TGA;TAA
GAGA-0491.Scaffold177.90203-90539	GAGA-0491	Lasius fuliginosus s2	Formicinae	Ankyrin 3 (Ankyrin repeat family protein)	Wolbachia	Rickettsiales	Alphaproteobacteria	Scaffold177	90203-90539	Scaffold177:90203-90539	90203	90539	336	54	54	51	1	90203	90519	90539	91085	336	566	9	0	Q4EBI3	98.2	88.3	17.7	20	5.9000000000000003E-31	5.8999999999999996E-45	AAA	GTG	TGG	TAA
GAGA-0491.Scaffold61.1134134-1139209	GAGA-0491	Lasius fuliginosus s2	Formicinae	Uncharacterized protein;Ankyrin repeat protein	Wolbachia	Rickettsiales	Alphaproteobacteria	Scaffold61	1134134-1139209	Scaffold61:1134134-1139209	1134134	1139209	5075	56	55	34	2	1134134;1136378	1133983;1136393	1136445;1139209	1136445;1139215	2311;2831	2462;2822	1810;4675	2019;4669	A0A2P1P8I2;E9P653	98.7;99.0	96.8;99.6	79.1;90.6	91.6;90.7	NA;NA	NA;NA	TGG;ATG	ATG;ATG	TGA;GTA	TGA;TAA
GAGA-0491.Scaffold61.1168409-1169995	GAGA-0491	Lasius fuliginosus s2	Formicinae	Ankyrin repeat protein;Ankyrin 3 (Ankyrin repeat family protein)	Wolbachia	Rickettsiales	Alphaproteobacteria	Scaffold61	1168409-1169995	Scaffold61:1168409-1169995	1168409	1169995	1586	47	52	43	2	1168806;1168453	1168806;1168453	1169995;1168830	1170056;1168830	1189;377	1250;377	662;306	675;306	E9P653;Q4EBI3	100.0;68.0	95.9;68.0	39.2;13.8	39.5;13.8	8.6e-102;9.2e-32	4.2e-102;9.2e-32	ATG;ATG	ATG;ATG	TGT;TAA	TAA;TAA
GAGA-0491.Scaffold76.714754-721705	GAGA-0491	Lasius fuliginosus s2	Formicinae	Uncharacterized protein	Wolbachia	Rickettsiales	Alphaproteobacteria	Scaffold76	714754-721705	Scaffold76:714754-721705	714754	721705	6951	50	62	29	1	714754	714734	721660	721660	6906	6926	688	695	A0A5F1B8K0	89	88.7	61.6	61.6	9.8000000000000007E-209	9.8999999999999998E-209	ATG	ATG	ATA	TAA
GAGA-0491.Scaffold88.241279-244290	GAGA-0491	Lasius fuliginosus s2	Formicinae	Ankyrin 3 (Ankyrin repeat family protein);Ankyrin 3 (Ankyrin repeat family protein);Ankyrin 3 (Ankyrin repeat family protein)	Wolbachia	Rickettsiales	Alphaproteobacteria	Scaffold88	241279-244290	Scaffold88:241279-244290	241279	244290	3011	59	56	44	3	242430;243692;241323	242430;243692;241323	243245;244290;242348	243245;244339;242348	815;598;1025	815;647;1025	109;57;82	109;74;82	Q4EBI3;Q4EBI3;Q4EBI3	75.6;98.5;99.4	75.6;92.6;99.4	32.6;30.5;52.0	32.6;31.0;52.0	6.6e-53;6.8e-48;1.8e-94	6.6e-53;6.5e-48;1.8e-94	GTG;GTG;ATG	GTG;GTG;ATG	TAG;TAA;TAA	TAG;TGA;TAA
GAGA-0491.Scaffold88.303130-304977	GAGA-0491	Lasius fuliginosus s2	Formicinae	Ankyrin 3 (Ankyrin repeat family protein);NA	Wolbachia	Rickettsiales	Alphaproteobacteria	Scaffold88	303130-304977	Scaffold88:303130-304977	303130	304977	1847	62	65	53	2	303174;304873	303174;303174	304637;304977	304637;304637	1463;104	1463;1463	1680;197	1680;1680	Q4EBI3;NA	91.8;NA	91.8;91.8	60.6;NA	60.6;60.6	2.9e-105;NA	2.9e-105;2.9e-105	ATG;TTG	ATG;ATG	TAA;ATG	TAA;TAA
GAGA-0491.Scaffold90.447079-447464	GAGA-0491	Lasius fuliginosus s2	Formicinae	Ankyrin 3 (Ankyrin repeat family protein)	Wolbachia	Rickettsiales	Alphaproteobacteria	Scaffold90	447079-447464	Scaffold90:447079-447464	447079	447464	385	40	41	39	1	447079	447027	447464	448391	385	1364	736	1790	Q4EBI3	100	65.599999999999994	20.6	29.5	3.8000000000000003E-30	1.2E-81	GAA	ATG	ACT	TAG
GAGA-0491.Scaffold90.508152-513146	GAGA-0491	Lasius fuliginosus s2	Formicinae	Ankyrin repeat protein	Wolbachia	Rickettsiales	Alphaproteobacteria	Scaffold90	508152-513146	Scaffold90:508152-513146	508152	513146	4994	46	50	18	1	508152	508145	513097	513097	4945	4952	1316	1316	E9P653	57.3	56.4	97.9	96.2	1.4E-249	3.2000000000000001E-246	ATG	ATG	GGT	TAA
GAGA-0494.Scaffold44.436860-437314	GAGA-0494	Rossomyrmex minuchae	Formicinae	hypothetical protein;hypothetical protein	Wolbachia	Rickettsiales	Alphaproteobacteria	Scaffold44	436860-437314	Scaffold44:436860-437314	436860	437314	454	49	51	43	2	436860;437237	436791;NA	436964;437314	436964;NA	104;77	173;NA	15322;457	23489;NA	NA;NA	NA;NA	NA;NA	NA;NA	NA;NA	NA;NA	NA;NA	ATG;AAT	ATG;NA	AAA;TAA	TAG;NA
GAGA-0494.Scaffold44.440059-447425	GAGA-0494	Rossomyrmex minuchae	Formicinae	Ankyrin repeat domain protein	Wolbachia	Rickettsiales	Alphaproteobacteria	Scaffold44	440059-447425	Scaffold44:440059-447425	440059	447425	7366	63	67	63	1	440059	440042	447425	447376	7366	7334	1864	1838	C0R3E9	99.8	99.8	99	98.6	NA	NA	TCA	ATG	TTT	TAG
GAGA-0494.Scaffold48.340537-343184	GAGA-0494	Rossomyrmex minuchae	Formicinae	Tetratricopeptide repeat protein;Uncharacterized protein GF1gp22 (Fragment);Ankyrin repeat domain protein	Wolbachia	Rickettsiales	Alphaproteobacteria	Scaffold48	340537-343184	Scaffold48:340537-343184	340537	343184	2647	68	68	44	3	341042;341780;340609	341042;341780;340609	341455;343184;340974	341455;343243;340974	413;1404;365	413;1463;365	55;37;82	55;37;82	A0A4Y6UMV0;B9A8X2;C0R3E9	97.8;100.0;100.0	97.8;97.9;100.0	6.8;64.9;4.9	6.8;66.3;4.9	1.2e-52;1.8e-192;4.2e-45	1.2e-52;8.3e-193;4.2e-45	ATG;TTA;TTG	ATG;GTG;TTG	TGA;TAA;TAA	TGA;TAA;TAA
GAGA-0502.Scaffold10.4109459-4110669	GAGA-0502	Iberoformica subrufa	Formicinae	Cyclopropane fatty acyl phospholipid synthase (EC 2.1.1.79)	Sodalis	Enterobacterales	Gammaproteobacteria	Scaffold10	4109459-4110669	Scaffold10:4109459-4110669	4109459	4110669	1210	86	86	81	1	4109520	4109520	4110665	4110665	1145	1145	130	130	A0A151ULI1	100	100	100	100	NA	NA	ATG	ATG	TGA	TGA
GAGA-0502.Scaffold104.261855-262248	GAGA-0502	Iberoformica subrufa	Formicinae	Cyclopropane-fatty-acyl-phospholipid_synthase	Cronobacter_sakazaki	Enterobacterales	Gammaproteobacteria	Scaffold104	261855-262248	Scaffold104:261855-262248	261855	262248	393	167	153	151	1	262072	262093	262215	262215	143	122	0	0	NA	NA	NA	NA	NA	NA	NA	ATG	ATG	TAA	TAA
GAGA-0502.Scaffold15.2279751-2280007	GAGA-0502	Iberoformica subrufa	Formicinae	Ribosomal RNA small subunit methyltransferase A (EC 2.1.1.182) (16S rRNA (adenine(1518)-N(6)/adenine(1519)-N(6))-dimethyltransferase) (16S rRNA dimethyladenosine transferase) (16S rRNA dimethylase) (S-adenosylmethionine-6-N', N'-adenosyl(rRNA) dimethyltransferase);NA	Spiroplasma	Entoplasmatales	Mollicutes	Scaffold15	2279751-2280007	Scaffold15:2279751-2280007	2279751	2280007	256	85	85	85	2	2279782;2279751	2279782;NA	2280007;2279822	2280042;NA	225;71	260;NA	0;0	0;0	W0GSI6;NA	94.7;NA	89.5;NA	24.6;NA	26.7;NA	1.6e-20;NA	7.2e-21;NA	GTG;TCA	GTG;NA	AAA;TAA	TAA;NA
GAGA-0502.Scaffold24.3179491-3179882	GAGA-0502	Iberoformica subrufa	Formicinae	Cyclopropane-fatty-acyl-phospholipid synthase (EC 2.1.1.79)	Cronobacter_sakazaki	Enterobacterales	Gammaproteobacteria	Scaffold24	3179491-3179882	Scaffold24:3179491-3179882	3179491	3179882	391	336	340	334	1	3179494	NA	3179643	NA	149	NA	0	NA	A0A0T9LFT5	100	NA	12.8	NA	4.2999999999999999E-13	NA	TTG	NA	TGA	NA
GAGA-0502.Scaffold36.144621-149765	GAGA-0502	Iberoformica subrufa	Formicinae	Cyclopropane fatty acyl phospholipid synthase (EC 2.1.1.79);Cyclopropane fatty acyl phospholipid synthase (EC 2.1.1.79);Cyclopropane fatty acyl phospholipid synthase (EC 2.1.1.79);Cyclopropane fatty acyl phospholipid synthase (EC 2.1.1.79)	Shigella;Sodalis	Enterobacterales	Gammaproteobacteria	Scaffold36	144621-149765	Scaffold36:144621-149765	144621	149765	5144	77	106	58	4	149528;145033;148956;144621	149528;145033;148956;144595	149761;145692;149141;145014	149761;145692;149141;145014	233;659;185;393	233;659;185;419	0;21;5;63	0;21;5;66	A0A151ULI1;A0A151ULI1;A0A151ULI1;A0A151ULI1	100.0;99.5;100.0;77.9	100.0;99.5;100.0;73.4	20.1;57.2;15.9;26.6	20.1;57.2;15.9;26.6	7.4e-26;3.8e-91;3.2e-24;3.2e-48	7.4e-26;3.8e-91;3.2e-24;3.1e-48	ATG;ATG;TTG;TTG	ATG;ATG;TTG;TTG	TGA;TAG;TAG;GCC	TGA;TAG;TAG;TAA
GAGA-0502.Scaffold36.343969-348755	GAGA-0502	Iberoformica subrufa	Formicinae	Cyclopropane fatty acyl phospholipid synthase (EC 2.1.1.79);Cyclopropane fatty acyl phospholipid synthase (EC 2.1.1.79);Cyclopropane-fatty-acyl-phospholipid synthase	Escherichia_ferguson;Serratia_marcescens	Enterobacterales	Gammaproteobacteria	Scaffold36	343969-348755	Scaffold36:343969-348755	343969	348755	4786	10	5	5	3	343969;344381;344784	343943;344381;344784	344362;344791;345044	344362;344791;345044	393;410;260	419;410;260	11;2;0	11;2;0	A0A151ULI1;A0A151ULI1;A0A4R3Z3L5	77.9;99.3;91.9	73.4;99.3;91.9	26.6;35.5;20.6	26.6;35.5;20.6	3.0e-46;3.9e-54;1.0e-27	2.9e-46;3.9e-54;1.0e-27	TTG;TTG;ATG	TTG;TTG;ATG	GCC;TAG;TAA	TAA;TAG;TAA
GAGA-0502.Scaffold39.21081-21451	GAGA-0502	Iberoformica subrufa	Formicinae	Cyclopropane fatty acyl phospholipid synthase (EC 2.1.1.79)	Salmonella_enterica	Enterobacterales	Gammaproteobacteria	Scaffold39	21081-21451	Scaffold39:21081-21451	21081	21451	370	32	32	32	1	21209	21047	21442	21463	233	416	0	0	A0A151ULI1	100	NA	20.100000000000001	NA	4.6999999999999996E-28	NA	ATG	ATG	TGA	TGA
GAGA-0502.Scaffold7.8320662-8321878	GAGA-0502	Iberoformica subrufa	Formicinae	Cyclopropane fatty acyl phospholipid synthase (EC 2.1.1.79)	Sodalis	Enterobacterales	Gammaproteobacteria	Scaffold7	8320662-8321878	Scaffold7:8320662-8321878	8320662	8321878	1216	148	131	124	1	8320724	8320724	8321872	8321872	1148	1148	24600	24600	A0A151ULI1	100	100	100	100	NA	NA	ATG	ATG	TAA	TAA
GAGA-0503.Scaffold1.6691443-6691643	GAGA-0503	Oxyopomyrmex cf. saulcyi	Myrmicinae	Mitochondrial NADH dehydrogenase ubiquinone iron-sulfur protein 8 (Fragment)	Candidatus_Liberibacter	Hyphomicrobiales	Alphaproteobacteria	Scaffold1	6691443-6691643	Scaffold1:6691443-6691643	6691443	6691643	200	60	62	60	1	6691443	6691386	6691643	6691574	NA	NA	NA	NA	A0A1L1VEI7	98.5	NA	40.9	NA	1.0000000000000001E-30	NA	TCC	ATG	GGT	TAA
GAGA-0505.Scaffold84.55509-55735	GAGA-0505	Goniomma hispanicum	Myrmicinae	Protein translocase subunit SecY	Wolbachia	Rickettsiales	Alphaproteobacteria	Scaffold84	55509-55735	Scaffold84:55509-55735	55509	55735	226	137	137	134	1	55509	NA	55735	NA	NA	NA	NA	NA	A0A225X7N9	100	NA	17	NA	3.4999999999999999E-31	NA	GTC	NA	TTC	NA
GAGA-0510.Scaffold127.473304-477948	GAGA-0510	Temnothorax nylanderi	Myrmicinae	Transposase IS116/IS110/IS902 family protein;Disulfide bond formation protein D;Uncharacterized protein (Fragment);Uncharacterized protein;Transposase, IS110 family (Fragment)	Wolbachia	Rickettsiales	Alphaproteobacteria	Scaffold127	473304-477948	Scaffold127:473304-477948	473304	477948	4644	61	61	42	5	477303;473304;474161;473878;477719	477303;473224;474161;473878;477913	477722;473511;474400;474234;477948	477722;473511;474400;474234;478191	419;207;239;356;229	419;287;239;356;278	0;2;0;2;9	0;2;0;2;26	A0A369RIP2;A0A3B0J9W7;C0F8G5;M9WXB4;Q4E959	95.7;95.6;97.5;85.6;98.7	95.7;85.3;97.5;85.6;85.9	39.1;26.4;57.5;51.0;40.7	39.1;32.5;57.5;51.0;1.7	3.7e-57;3.2e-24;2.3e-30;5.2e-43;8.9e-27	3.7e-57;1.4e-24;2.3e-30;5.2e-43;5.3e-19	ATG;TTT;ATG;ATG;ACT	ATG;ATG;ATG;ATG;TTG	TAG;TAG;TAA;TAA;TGA	TAG;TAG;TAA;TAA;TAA
GAGA-0510.Scaffold127.480534-480783	GAGA-0510	Temnothorax nylanderi	Myrmicinae	Ankyrin repeat domain protein	Wolbachia	Rickettsiales	Alphaproteobacteria	Scaffold127	480534-480783	Scaffold127:480534-480783	480534	480783	249	51	50	50	1	480534	479535	480783	481783	249	2248	20	131	B6Y9L2	98.8	92.5	1.7	15.1	3.8000000000000001E-17	1.2999999999999999E-89	TGT	AAT	AAT	AAG
GAGA-0510.Scaffold127.493572-495050	GAGA-0510	Temnothorax nylanderi	Myrmicinae	Uncharacterized protein;Ankyrin repeat domain-containing protein;NA	Wolbachia	Rickettsiales	Alphaproteobacteria	Scaffold127	493572-495050	Scaffold127:493572-495050	493572	495050	1478	41	41	37	3	494901;493572;493725	493725;493725;493725	495050;493743;493892	493892;493892;493892	149;171;167	167;167;167	35;12;17	26;26;26	A0A178GTT0;A0A6M5EAX1;NA	91.8;80.4;NA	NA;NA;NA	25.9;6.4;NA	NA;NA;NA	9.7e-13;3.0e-11;NA	NA;NA;NA	AAT;TGT;TTG	TTG;TTG;TTG	TAA;TAA;TAG	TAG;TAG;TAG
GAGA-0510.Scaffold23.567458-578258	GAGA-0510	Temnothorax nylanderi	Myrmicinae	Inactivated homolog of predicted Zn-dependent protease;Ankyrin repeat domain protein	Wolbachia	Rickettsiales	Alphaproteobacteria	Scaffold23	567458-578258	Scaffold23:567458-578258	567458	578258	10800	46	28	6	2	577844;567458	577844;567440	578080;574717	578080;574717	236;7259	236;7277	2;67	2;67	A0A060PZ99;C0R3E9	93.6;100.0	93.6;99.9	16.4;97.7	16.4;97.8	5.9e-18;NA	5.9e-18;NA	GTG;GAA	GTG;ATG	TAA;TAA	TAA;TAA
GAGA-0510.Scaffold253.119044-126500	GAGA-0510	Temnothorax nylanderi	Myrmicinae	Ankyrin repeat domain protein;NA	Wolbachia	Rickettsiales	Alphaproteobacteria	Scaffold253	119044-126500	Scaffold253:119044-126500	119044	126500	7456	39	40	14	2	119620;119044	119620;NA	126500;119194	126765;NA	6880;150	7145;NA	974;80	991;NA	C0R3E9;NA	99.7;NA	99.7;NA	94.0;NA	97.6;NA	NA;NA	NA;NA	TAT;CTA	ATG;NA	TGA;TAA	TGA;NA
GAGA-0510.Scaffold38.1250818-1251998	GAGA-0510	Temnothorax nylanderi	Myrmicinae	DUF1016 family protein;NA;NA	Wolbachia	Rickettsiales	Alphaproteobacteria	Scaffold38	1250818-1251998	Scaffold38:1250818-1251998	1250818	1251998	1180	81	44	21	3	1251324;1251199;1250818	1251324;1251199;NA	1251941;1251327;1250897	1251941;1251327;NA	617;128;79	617;128;NA	1280;231;34	1280;231;NA	A0A6H2NU06;NA;NA	97.1;NA;NA	97.1;NA;NA	36.0;NA;NA	36.0;NA;NA	6.4e-92;NA;NA	6.4e-92;NA;NA	ATG;GTG;ATG	ATG;GTG;NA	TGA;TGA;TCA	TGA;TGA;NA
GAGA-0510.Scaffold54.844501-862653	GAGA-0510	Temnothorax nylanderi	Myrmicinae	Uncharacterized protein;Ankyrin repeat domain protein;Ankyrin repeat domain protein;NA	Wolbachia	Rickettsiales	Alphaproteobacteria	Scaffold54	844501-862653	Scaffold54:844501-862653	844501	862653	18152	46	43	19	4	851774;855305;844501;852191	851774;855305;843905;852191	852031;862570;851209;852379	852031;862570;851209;852379	257;7265;6708;188	257;7265;7304;188	0;223;2683;0	0;223;2686;0	A0A1A9VJP0;C0R3E9;C0R3E9;NA	100.0;99.8;100.0;NA	100.0;99.8;99.9;NA	6.1;97.7;89.9;NA	6.1;97.7;97.8;NA	3.7e-09;NA;NA;NA	3.7e-09;NA;NA;NA	ATG;ATG;GAT;ATG	ATG;ATG;ATG;ATG	TAA;TAA;TAA;TAA	TAA;TAA;TAA;TAA
GAGA-0510.Scaffold54.866981-868408	GAGA-0510	Temnothorax nylanderi	Myrmicinae	hypothetical protein	Wolbachia	Rickettsiales	Alphaproteobacteria	Scaffold54	866981-868408	Scaffold54:866981-868408	866981	868408	1427	46	36	1	1	868072	868072	868221	868221	149	149	0	0	NA	NA	NA	NA	NA	NA	NA	GTG	GTG	TAA	TAA
GAGA-0510.Scaffold54.876852-885250	GAGA-0510	Temnothorax nylanderi	Myrmicinae	Helicase C-terminal domain-containing protein (Fragment);Ankyrin repeat domain protein	Wolbachia	Rickettsiales	Alphaproteobacteria	Scaffold54	876852-885250	Scaffold54:876852-885250	876852	885250	8398	49	84	42	2	884650;876904	884650;876904	885024;884265	885024;884265	374;7361	374;7361	576;66159	576;66159	A0A3D1L565;C0R3E9	91.1;100.0	91.1;100.0	60.7;98.5	60.7;98.5	3.5e-07;NA	3.5e-07;NA	ATG;ATG	ATG;ATG	TGA;TAA	TGA;TAA
GAGA-0510.Scaffold54.894001-901714	GAGA-0510	Temnothorax nylanderi	Myrmicinae	Deleted.;Ankyrin repeat domain protein;Ankyrin repeat domain protein	Wolbachia	Rickettsiales	Alphaproteobacteria	Scaffold54	894001-901714	Scaffold54:894001-901714	894001	901714	7713	110	98	37	3	901560;895569;894001	NA;895569;893614	901714;900779;895530	NA;900779;895530	154;5210;1529	NA;5210;1916	216;3870;387	NA;3870;510	A0A1L9ASN4;C0R3E9;C0R3E9	92.0;99.7;97.1	NA;99.7;97.5	11.0;71.3;20.1	NA;71.3;25.2	1.6e-07;0.0e+00;1.6e-197	NA;0.0e+00;1.0e-244	TCT;TTG;AGT	NA;TTG;ATG	TAA;TGA;TAA	NA;TGA;TAA
GAGA-0510.Scaffold83.586281-594493	GAGA-0510	Temnothorax nylanderi	Myrmicinae	Tetratricopeptide repeat protein;Ankyrin repeat domain protein;Ankyrin repeat domain protein;NA	Wolbachia	Rickettsiales	Alphaproteobacteria	Scaffold83	586281-594493	Scaffold83:586281-594493	586281	594493	8212	46	31	12	4	593052;586281;593524;594259	593052;586257;593524;NA	593537;592907;593748;594493	593537;592907;593748;NA	485;6626;224;234	485;6650;224;NA	67;139;3;1	67;139;3;NA	A0A4Y6UMV0;C0R3E9;C0R3E9;NA	83.2;99.8;90.5;NA	83.2;99.5;90.5;NA	6.8;88.2;2.7;NA	6.8;88.2;2.7;NA	1.3e-49;NA;3.5e-15;NA	1.3e-49;NA;3.5e-15;NA	ATG;GAA;ATG;TGA	ATG;ATG;ATG;NA	TGA;TGA;TAA;TAA	TGA;TGA;TAA;NA
GAGA-0510.Scaffold83.591610-597991	GAGA-0510	Temnothorax nylanderi	Myrmicinae	Tetratricopeptide repeat protein;Tetratricopeptide repeat protein;Ankyrin repeat domain protein;NA;NA	Wolbachia	Rickettsiales	Alphaproteobacteria	Scaffold83	591610-597991	Scaffold83:591610-597991	591610	597991	6381	35	28	21	5	593052;591610;593524;595538;597739	593052;590611;593524;595538;597739	593537;592907;593748;595834;597894	593537;592907;593748;595834;597894	485;1297;224;296;155	485;2296;224;296;155	67;15;3;2;3	67;32;3;2;3	A0A4Y6UMV0;A0A4Y6UMV0;C0R3E9;NA;NA	83.2;99.1;90.5;NA;NA	83.2;99.5;90.5;NA;NA	6.8;21.7;2.7;NA;NA	6.8;32.0;2.7;NA;NA	1.3e-49;4.9e-162;3.5e-15;NA;NA	1.3e-49;4.5e-282;3.5e-15;NA;NA	ATG;GAT;ATG;GTG;ATG	ATG;TAG;ATG;GTG;ATG	TGA;TGA;TAA;TAA;TAA	TGA;TGA;TAA;TAA;TAA
GAGA-0510.Scaffold83.617816-624631	GAGA-0510	Temnothorax nylanderi	Myrmicinae	Ankyrin repeat domain protein	Wolbachia	Rickettsiales	Alphaproteobacteria	Scaffold83	617816-624631	Scaffold83:617816-624631	617816	624631	6815	38	25	15	1	617846	617846	624631	625360	6785	7514	46	55	C0R3E9	99.5	89.9	88.8	88.8	NA	NA	ATG	ATG	TTC	TAG
GAGA-0511.Scaffold207.99499-100432	GAGA-0511	Temnothorax ravouxi	Myrmicinae	Ankyrin repeat domain protein	Wolbachia	Rickettsiales	Alphaproteobacteria	Scaffold207	99499-100432	Scaffold207:99499-100432	99499	100432	933	40	40	39	1	99499	98500	100432	101432	933	2932	36	126	C0R3E9	99	99.3	12.4	38.1	4.1999999999999998E-108	0	TAT	GAA	ATT	CTA
GAGA-0511.Scaffold33.438001-445730	GAGA-0511	Temnothorax ravouxi	Myrmicinae	Ankyrin repeat domain protein;NA	Wolbachia	Rickettsiales	Alphaproteobacteria	Scaffold33	438001-445730	Scaffold33:438001-445730	438001	445730	7729	48	80	24	2	438001;445579	437612;NA	444799;445730	444799;NA	6798;151	7187;NA	7982;442	8262;NA	C0R3E9;NA	99.3;NA	99.3;NA	92.2;NA	97.4;NA	NA;NA	NA;NA	ATG;TCT	ATG;NA	TAA;TAA	TAA;NA
GAGA-0511.Scaffold5.3127011-3129187	GAGA-0511	Temnothorax ravouxi	Myrmicinae	Uncharacterized protein;Uncharacterized protein;NA	Wolbachia	Rickettsiales	Alphaproteobacteria	Scaffold5	3127011-3129187	Scaffold5:3127011-3129187	3127011	3129187	2176	64	43	41	3	3127090;3127644;3127011	3127090;3127644;3126917	3127635;3129116;3127084	3127635;3129116;3127096	545;1472;73	545;1472;179	10;0;2	10;0;3	A0A4S2QRJ3;M9WNG4;NA	98.3;97.6;NA	98.3;97.6;NA	25.1;97.6;NA	25.1;97.6;NA	2.5e-74;NA;NA	2.5e-74;NA;NA	ATG;ATG;ATG	ATG;ATG;GTG	TAG;TAG;TGA	TAG;TAG;TAA
GAGA-0511.Scaffold57.7734-16779	GAGA-0511	Temnothorax ravouxi	Myrmicinae	Ankyrin repeat domain protein;NA;NA	Wolbachia	Rickettsiales	Alphaproteobacteria	Scaffold57	7734-16779	Scaffold57:7734-16779	7734	16779	9045	51	45	4	3	9513;8385;7872	9513;8385;7872	16779;8582;7991	16796;8582;7991	7266;197;119	7283;197;119	60;3;0	60;3;0	C0R3E9;NA;NA	100.0;NA;NA	99.9;NA;NA	97.7;NA;NA	97.8;NA;NA	NA;NA;NA	NA;NA;NA	AGA;TTG;ATG	ATG;TTG;ATG	TAA;TAA;TAA	TAA;TAA;TAA
GAGA-0511.Scaffold84.595202-596389	GAGA-0511	Temnothorax ravouxi	Myrmicinae	DUF1016 family protein;NA	Wolbachia	Rickettsiales	Alphaproteobacteria	Scaffold84	595202-596389	Scaffold84:595202-596389	595202	596389	1187	55	67	51	2	595715;595202	595715;NA	596332;595288	596332;NA	617;86	617;NA	222;19	222;NA	A0A6H2NU06;NA	97.1;NA	97.1;NA	36.0;NA	36.0;NA	1.2e-93;NA	1.2e-93;NA	ATG;GAC	ATG;NA	TGA;TAA	TGA;NA
GAGA-0512.Scaffold134.138934-145722	GAGA-0512	Temnothorax pilagens	Myrmicinae	Ankyrin repeat domain protein	Wolbachia	Rickettsiales	Alphaproteobacteria	Scaffold134	138934-145722	Scaffold134:138934-145722	138934	145722	6788	49	21	9	1	138934	138914	145567	145567	6633	6653	663	664	C0R3E9	100	100	86.8	87	NA	NA	ACT	ATG	TAA	TAA
GAGA-0512.Scaffold2.8485522-8487574	GAGA-0512	Temnothorax pilagens	Myrmicinae	Uncharacterized protein;Uncharacterized protein;Uncharacterized protein;Uncharacterized protein;NA	Wolbachia	Rickettsiales	Alphaproteobacteria	Scaffold2	8485522-8487574	Scaffold2:8485522-8487574	8485522	8487574	2052	27	18	15	5	8487435;8487105;8486194;8485592;8486951	NA;8487105;8486194;8485592;8486951	8487574;8487356;8486730;8486227;8487070	NA;8487356;8486730;8486227;8487070	139;251;536;635;119	NA;251;536;635;119	11;22;31;39;9	NA;22;31;39;9	A0A4S2QRJ3;A0A4S2QRJ3;M9WNG4;M9WNG4;NA	89.1;85.5;100.0;92.4;NA	NA;85.5;100.0;92.4;NA	6.0;9.8;36.3;39.8;NA	NA;9.8;36.3;39.8;NA	1.7e-09;7.3e-21;8.8e-83;1.3e-77;NA	NA;7.3e-21;8.8e-83;1.3e-77;NA	ATG;ATG;TTG;ATG;ATG	NA;ATG;TTG;ATG;ATG	TAG;TAG;TAA;TAA;TAA	NA;TAG;TAA;TAA;TAA
GAGA-0512.Scaffold26.1740048-1740197	GAGA-0512	Temnothorax pilagens	Myrmicinae	Uncharacterized protein	Spiroplasma	Entoplasmatales	Mollicutes	Scaffold26	1740048-1740197	Scaffold26:1740048-1740197	1740048	1740197	149	37	28	12	1	1740048	NA	1740148	NA	100	NA	6353	NA	A0A6M5JM48	100	NA	63.5	NA	4.7E-7	NA	ATG	NA	AGA	NA
GAGA-0512.Scaffold4.5227523-5228691	GAGA-0512	Temnothorax pilagens	Myrmicinae	DUF1016 family protein;NA;NA;NA	Wolbachia	Rickettsiales	Alphaproteobacteria	Scaffold4	5227523-5228691	Scaffold4:5227523-5228691	5227523	5228691	1168	53	53	53	4	5227579;5228193;5228356;5228585	5227579;5228193;5228356;NA	5228196;5228321;5228487;5228691	5228196;5228321;5228487;NA	617;128;131;106	617;128;131;NA	411;78;3;36	411;78;3;NA	A0A6H2NU06;NA;NA;NA	97.1;NA;NA;NA	97.1;NA;NA;NA	36.0;NA;NA;NA	36.0;NA;NA;NA	1.3e-92;NA;NA;NA	1.3e-92;NA;NA;NA	ATG;GTG;TTG;TAG	ATG;GTG;TTG;NA	TGA;TGA;TGA;TAA	TGA;TGA;TGA;NA
GAGA-0512.Scaffold403.8130-8429	GAGA-0512	Temnothorax pilagens	Myrmicinae	Uncharacterized protein	Wolbachia	Rickettsiales	Alphaproteobacteria	Scaffold403	8130-8429	Scaffold403:8130-8429	8130	8429	299	35	36	35	1	8130	8118	8429	8369	299	251	4	3	A0A225X7H2	98	97.6	31.2	25.8	3.3000000000000003E-29	2.0999999999999999E-20	AAT	ATG	AAG	TAA
GAGA-0512.Scaffold5.477001-485162	GAGA-0512	Temnothorax pilagens	Myrmicinae	Ankyrin repeat domain protein;NA	Wolbachia	Rickettsiales	Alphaproteobacteria	Scaffold5	477001-485162	Scaffold5:477001-485162	477001	485162	8161	24	18	17	2	477001;484990	476632;NA	484227;485162	484227;NA	7226;172	7595;NA	10780;552	11126;NA	C0R3E9;NA	99.8;NA	99.6;NA	92.7;NA	97.5;NA	NA;NA	NA;NA	CTT;TCT	ATG;NA	TAA;TGA	TAA;NA
GAGA-0512.Scaffold64.576013-584464	GAGA-0512	Temnothorax pilagens	Myrmicinae	Ankyrin repeat domain protein;Inactivated homolog of predicted Zn-dependent protease, PmbA	Wolbachia	Rickettsiales	Alphaproteobacteria	Scaffold64	576013-584464	Scaffold64:576013-584464	576013	584464	8451	67	36	20	2	576013;584306	575531;NA	582835;584464	582835;NA	6822;158	7304;NA	394;11	420;NA	C0R3E9;Q5GRT0	100.0;78.8	99.9;NA	91.4;9.2	97.8;NA	NA;3.2e-08	NA;NA	GTC;GTT	ATG;NA	TAA;TGA	TAA;NA
GAGA-0512.Scaffold64.594241-603571	GAGA-0512	Temnothorax pilagens	Myrmicinae	ATP-dependent RNA helicase DeaD/DeaH box family;Ankyrin repeat domain protein;NA	Wolbachia	Rickettsiales	Alphaproteobacteria	Scaffold64	594241-603571	Scaffold64:594241-603571	594241	603571	9330	14	41	3	3	602731;594296;602262	602731;594296;602262	603423;601615;602420	603423;601615;602420	692;7319;158	692;7319;158	71;439;29	71;439;29	A0A060Q0G1;C0R3E9;NA	93.9;99.5;NA	93.9;99.5;NA	53.3;97.9;NA	53.3;97.9;NA	8.4e-39;NA;NA	8.4e-39;NA;NA	ATG;ATG;ATG	ATG;ATG;ATG	TAA;TAA;TAA	TAA;TAA;TAA
GAGA-0512.Scaffold64.613321-621870	GAGA-0512	Temnothorax pilagens	Myrmicinae	Ankyrin repeat domain protein;Ankyrin repeat domain protein;Ankyrin repeat domain protein	Wolbachia	Rickettsiales	Alphaproteobacteria	Scaffold64	613321-621870	Scaffold64:613321-621870	613321	621870	8549	19	22	10	3	613321;617466;617907	613303;617466;617907	617475;617747;620588	617475;617747;620588	4154;281;2681	4172;281;2681	93;5;159	93;5;159	C0R3E9;C0R3E9;C0R3E9	98.1;98.9;98.5	98.1;98.9;98.5	54.7;3.7;35.6	54.9;3.7;35.6	0.0e+00;3.9e-22;0.0e+00	0.0e+00;3.9e-22;0.0e+00	GAA;TTG;ATG	ATG;TTG;ATG	TAG;TAA;TAA	TAG;TAA;TAA
GAGA-0512.Scaffold64.633025-641423	GAGA-0512	Temnothorax pilagens	Myrmicinae	Ankyrin repeat domain protein;Ankyrin repeat domain protein;Ankyrin repeat domain protein;Ankyrin repeat domain protein;NA;NA	Wolbachia	Rickettsiales	Alphaproteobacteria	Scaffold64	633025-641423	Scaffold64:633025-641423	633025	641423	8398	30	41	1	6	633505;633079;638991;636485;640937;641300	633505;633079;638991;636485;640937;NA	636381;633267;640445;638962;641122;641423	636381;633267;640445;638962;641122;NA	2876;188;1454;2477;185;123	2876;188;1454;2477;185;NA	1361;103;1000;1254;140;151	1361;103;1000;1254;140;NA	C0R3E9;C0R3E9;C0R3E9;C0R3E9;NA;NA	99.1;98.4;100.0;100.0;NA;NA	99.1;98.4;100.0;100.0;NA;NA	38.4;2.5;19.6;32.7;NA;NA	38.4;2.5;19.6;32.7;NA;NA	0.0e+00;3.2e-16;3.6e-180;4.7e-309;NA;NA	0.0e+00;3.2e-16;3.6e-180;4.7e-309;NA;NA	TTG;ATG;TTG;ATG;TTG;CAA	TTG;ATG;TTG;ATG;TTG;NA	TGA;TGA;TAA;TGA;TGA;TAA	TGA;TGA;TAA;TGA;TGA;NA
GAGA-0512.Scaffold64.645109-653061	GAGA-0512	Temnothorax pilagens	Myrmicinae	Tetratricopeptide repeat protein;Ankyrin repeat domain protein;Ankyrin repeat domain protein;Ankyrin repeat domain protein	Wolbachia	Rickettsiales	Alphaproteobacteria	Scaffold64	645109-653061	Scaffold64:645109-653061	645109	653061	7952	21	56	7	4	650213;645162;651941;651597	650213;645162;651941;651597	651466;650180;652138;651833	651466;650180;652138;651833	1253;5018;197;236	1253;5018;197;236	580;1799;99;146	580;1799;99;146	A0A4Y6UMV0;C0R3E9;C0R3E9;C0R3E9	96.9;94.6;90.8;97.4	96.9;94.6;90.8;97.4	20.5;64.1;2.3;3.1	20.5;64.1;2.3;3.1	8.0e-154;0.0e+00;2.3e-14;1.0e-22	8.0e-154;0.0e+00;2.3e-14;1.0e-22	GTG;ATG;ATG;GTG	GTG;ATG;ATG;GTG	TAA;TAA;TAA;TAA	TAA;TAA;TAA;TAA
GAGA-0512.Scaffold65.432822-433169	GAGA-0512	Temnothorax pilagens	Myrmicinae	hypothetical protein	Wolbachia	Rickettsiales	Alphaproteobacteria	Scaffold65	432822-433169	Scaffold65:432822-433169	432822	433169	347	22	29	20	0		NA	NA	NA	NA	NA	NA	NA	NA	NA	NA	NA	NA	NA	NA	NA	NA	NA	NA
GAGA-0512.Scaffold65.436667-437636	GAGA-0512	Temnothorax pilagens	Myrmicinae	Ankyrin repeats family protein	Wolbachia	Rickettsiales	Alphaproteobacteria	Scaffold65	436667-437636	Scaffold65:436667-437636	436667	437636	969	19	19	19	1	436667	436741	437460	437460	793	719	145	144	A0A5B9JVP8	97	96.7	70.5	63.6	7.4000000000000006E-107	2.7000000000000001E-94	CTA	TTG	TGA	TGA
GAGA-0513.Scaffold118.10998-11334	GAGA-0513	Temnothorax ambiguus	Myrmicinae	ankyrin repeat protein RBE_0997ankyrin repeat protein RBE_0220ankyrin repeat protein RF_0381	Wolbachia	Rickettsiales	Alphaproteobacteria	Scaffold118	10998-11334	Scaffold118:10998-11334	10998	11334	336	54	55	53	1	10998	NA	11121	NA	123	NA	30	NA	NA	NA	NA	NA	NA	NA	NA	GAT	NA	TGA	NA
GAGA-0513.Scaffold161.350146-359667	GAGA-0513	Temnothorax ambiguus	Myrmicinae	Deleted.;Ankyrin repeat domain protein	Wolbachia	Rickettsiales	Alphaproteobacteria	Scaffold161	350146-359667	Scaffold161:350146-359667	350146	359667	9521	58	58	58	2	358081;350176	358081;350176	358236;357423	358236;357423	155;7247	155;7247	67;1668	67;1668	A0A1L9ASN4;C0R3E9	98.0;99.4	98.0;99.4	12.7;97.3	12.7;97.3	2.6e-10;NA	2.6e-10;NA	ATG;ATG	ATG;ATG	TAA;TAA	TAA;TAA
GAGA-0513.Scaffold161.375307-377639	GAGA-0513	Temnothorax ambiguus	Myrmicinae	Ankyrin repeat domain protein	Wolbachia	Rickettsiales	Alphaproteobacteria	Scaffold161	375307-377639	Scaffold161:375307-377639	375307	377639	2332	75	60	12	1	375307	375348	377639	377756	2332	2408	93	93	C0R3E9	99.2	99.1	31.4	32.1	4.9999999999999998E-281	1.3E-287	AAG	GTG	AAA	TGA
GAGA-0513.Scaffold220.16406-19584	GAGA-0513	Temnothorax ambiguus	Myrmicinae	Uncharacterized protein;NA	Wolbachia	Rickettsiales	Alphaproteobacteria	Scaffold220	16406-19584	Scaffold220:16406-19584	16406	19584	3178	35	40	20	2	16596;16406	19160;16596	16766;16615	19369;16766	170;209	209;170	0;0	10;0	A0A060Q0H3;NA	100.0;NA	NA;100.0	28.3;NA	NA;28.3	2.2e-22;NA	NA;2.2e-22	ATG;TCT	TTG;ATG	TAG;TAG	TAA;TAG
GAGA-0513.Scaffold220.36813-37561	GAGA-0513	Temnothorax ambiguus	Myrmicinae	Transposase IS116/IS110/IS902 family protein;IS110 family transposase (Transposase IS116/IS110/IS902 family protein);Transposase, IS110 family (Fragment)	Wolbachia	Rickettsiales	Alphaproteobacteria	Scaffold220	36813-37561	Scaffold220:36813-37561	36813	37561	748	50	47	44	3	36824;37117;37332	36824;37117;37526	36958;37242;37561	36958;37242;37762	134;125;229	134;125;236	2;6;1	2;6;4	A0A369RGI6;A0A369RIU8;Q4E959	100.0;100.0;98.7	100.0;100.0;88.5	16.3;24.3;40.7	16.3;24.3;1.4	2.0e-10;4.4e-10;1.7e-25	2.0e-10;4.4e-10;3.1e-11	ATG;TTG;ACT	ATG;TTG;TTG	TAA;TAA;TAA	TAA;TAA;TAA
GAGA-0513.Scaffold222.158627-159005	GAGA-0513	Temnothorax ambiguus	Myrmicinae	Uncharacterized protein;NA	Wolbachia	Rickettsiales	Alphaproteobacteria	Scaffold222	158627-159005	Scaffold222:158627-159005	158627	159005	378	72	74	72	2	158682;158943	158682;NA	158933;159005	158933;NA	251;62	251;NA	9;1	10;NA	A0A225X7H2;NA	97.6;NA	97.6;NA	25.8;NA	25.8;NA	4.3e-21;NA	4.3e-21;NA	ATG;TAT	ATG;NA	TAA;TAA	TAA;NA
GAGA-0513.Scaffold25.468576-469656	GAGA-0513	Temnothorax ambiguus	Myrmicinae	Uncharacterized protein;Uncharacterized protein	Wolbachia	Rickettsiales	Alphaproteobacteria	Scaffold25	468576-469656	Scaffold25:468576-469656	468576	469656	1080	81	23	17	2	468576;468946	468499;468946	468771;469656	468723;469638	195;710	224;692	0;3	0;0	A0A4S2QRJ3;M9WNG4	100.0;99.2	100.0;99.1	8.6;47.8	9.9;46.5	1.0e-14;8.8e-111	7.3e-21;1.1e-107	TTG;ATT	ATG;TTG	ATA;TAA	TAG;TAA
GAGA-0513.Scaffold27.2132518-2132991	GAGA-0513	Temnothorax ambiguus	Myrmicinae	OTU domain-containing protein	Wolbachia	Rickettsiales	Alphaproteobacteria	Scaffold27	2132518-2132991	Scaffold27:2132518-2132991	2132518	2132991	473	85	73	48	1	2132518	2132477	2132991	2133991	473	1514	67	171	A0A060Q434	100	94.3	52.5	88.9	2.7999999999999999E-57	NA	ACC	ATG	TAT	GTC
GAGA-0513.Scaffold27.2138712-2140098	GAGA-0513	Temnothorax ambiguus	Myrmicinae	Ankyrin repeat domain protein;Ankyrin repeat domain protein;Uncharacterized protein	Wolbachia	Rickettsiales	Alphaproteobacteria	Scaffold27	2138712-2140098	Scaffold27:2138712-2140098	2138712	2140098	1386	63	61	59	3	2139377;2138786;2139873	2139377;2138786;2139873	2139613;2139136;2140064	2139613;2139136;2140064	236;350;191	236;350;191	12;12;26	12;12;26	B6Y9L2;M9WQI6;Q73I81	87.2;79.3;96.8	87.2;79.3;96.8	1.5;3.8;19.3	1.5;3.8;19.3	9.4e-24;3.4e-34;5.3e-11	9.4e-24;3.4e-34;5.3e-11	ATG;GTG;ATG	ATG;GTG;ATG	TGA;TAG;TAA	TGA;TAG;TAA
GAGA-0513.Scaffold40.1482938-1486112	GAGA-0513	Temnothorax ambiguus	Myrmicinae	Ankyrin repeat protein	Wolbachia	Rickettsiales	Alphaproteobacteria	Scaffold40	1482938-1486112	Scaffold40:1482938-1486112	1482938	1486112	3174	118	42	3	1	1483009	1483009	1485678	1485678	2669	2669	803	803	E9P653	94.3	94.3	87.9	87.9	NA	NA	ATG	ATG	TAG	TAG
GAGA-0513.Scaffold40.1515123-1515830	GAGA-0513	Temnothorax ambiguus	Myrmicinae	Ankyrin repeat domain protein	Wolbachia	Rickettsiales	Alphaproteobacteria	Scaffold40	1515123-1515830	Scaffold40:1515123-1515830	1515123	1515830	707	42	42	42	1	1515123	1514124	1515272	1515145	149	1021	623	2394	C0R3E9	89.8	NA	1.8	NA	1.3000000000000001E-9	NA	AAA	CAG	TAG	TAA
GAGA-0513.Scaffold50.1501-10665	GAGA-0513	Temnothorax ambiguus	Myrmicinae	Ankyrin repeat domain protein;Ankyrin repeat domain protein;Ankyrin repeat domain protein	Wolbachia	Rickettsiales	Alphaproteobacteria	Scaffold50	1501-10665	Scaffold50:1501-10665	1501	10665	9164	7	37	3	3	3975;4235;1501	3975;4235;502	4247;10597;4050	4247;10630;4050	272;6362;2549	272;6395;3548	2;1723;575	2;1731;861	C0R3E9;C0R3E9;C0R3E9	91.1;99.8;99.1	91.1;99.7;98.5	3.3;87.2;34.0	3.3;87.6;47.0	2.7e-23;NA;0.0e+00	2.7e-23;NA;0.0e+00	TTG;GTG;CCT	TTG;ATG;GAT	TAA;TAA;TAA	TAA;TAA;TAA
GAGA-0513.Scaffold52.824876-844725	GAGA-0513	Temnothorax ambiguus	Myrmicinae	Ankyrin repeat domain protein;NA;NA	Wolbachia	Rickettsiales	Alphaproteobacteria	Scaffold52	824876-844725	Scaffold52:824876-844725	824876	844725	19849	58	60	55	3	825355;832572;835577	825355;832572;835577	832140;832787;835930	832140;832787;835930	6785;215;353	6785;215;353	881;39;0	881;39;0	C0R3E9;NA;NA	99.2;NA;NA	99.2;NA;NA	90.7;NA;NA	90.7;NA;NA	NA;NA;NA	NA;NA;NA	ATG;TTG;TTG	ATG;TTG;TTG	TAA;TAA;TAG	TAA;TAA;TAG
GAGA-0513.Scaffold52.844016-863446	GAGA-0513	Temnothorax ambiguus	Myrmicinae	Ankyrin repeat domain protein;Ankyrin repeat domain protein;NA;NA	Wolbachia	Rickettsiales	Alphaproteobacteria	Scaffold52	844016-863446	Scaffold52:844016-863446	844016	863446	19430	14	20	1	4	846200;845001;862119;860832	846200;845001;862119;860832	852364;846179;862304;861287	852364;846179;862304;861287	6164;1178;185;455	6164;1178;185;455	798;111;6;26	798;111;6;26	C0R3E9;C0R3E9;NA;NA	99.9;99.2;NA;NA	99.9;99.2;NA;NA	82.2;15.8;NA;NA	82.2;15.8;NA;NA	NA;7.3e-146;NA;NA	NA;7.3e-146;NA;NA	ATG;GTG;ATG;ATG	ATG;GTG;ATG;ATG	TAG;TAA;TAG;TAG	TAG;TAA;TAG;TAG
GAGA-0513.Scaffold52.862592-871203	GAGA-0513	Temnothorax ambiguus	Myrmicinae	Ankyrin repeat domain protein	Wolbachia	Rickettsiales	Alphaproteobacteria	Scaffold52	862592-871203	Scaffold52:862592-871203	862592	871203	8611	21	109	0	1	863878	863878	871149	871149	7271	7271	267	267	C0R3E9	99.3	99.3	97.3	97.3	NA	NA	ATG	ATG	TAA	TAA
GAGA-0513.Scaffold6.3022732-3024790	GAGA-0513	Temnothorax ambiguus	Myrmicinae	DUF1016 family protein;NA;NA;NA	Wolbachia	Rickettsiales	Alphaproteobacteria	Scaffold6	3022732-3024790	Scaffold6:3022732-3024790	3022732	3024790	2058	41	44	38	4	3022788;3024731;3023402;3024251	3022788;NA;3023402;3024251	3023405;3024790;3023530;3024379	3023405;NA;3023530;3024379	617;59;128;128	617;NA;128;128	246;1;6;2	246;NA;6;2	A0A6H2NU06;NA;NA;NA	97.1;NA;NA;NA	97.1;NA;NA;NA	36.0;NA;NA;NA	36.0;NA;NA;NA	7.5e-93;NA;NA;NA	7.5e-93;NA;NA;NA	ATG;GTA;GTG;GTG	ATG;NA;GTG;GTG	TGA;TGA;TGA;TGA	TGA;NA;TGA;TGA
GAGA-0513.Scaffold64.948871-949052	GAGA-0513	Temnothorax ambiguus	Myrmicinae	Putative AAA-ATPase;Putative AAA-ATPase	Cardinium	Sphingobacteriales	Sphingobacteriia	Scaffold64	948871-949052	Scaffold64:948871-949052	948871	949052	181	41	38	33	1	948873;948873	948873;949052	949001;949001	949001;949174	128;128	128;122	0;0	0;0	A0A345PN33;A0A345PN33	100.0;100.0	100.0;NA	7.7;7.7	7.7;NA	7.1e-08;7.1e-08	7.1e-08;NA	ATG;ATG	ATG;TTG	TAA;TAA	TAA;TAA
GAGA-0513.Scaffold72.70155-70339	GAGA-0513	Temnothorax ambiguus	Myrmicinae	Putative AAA-ATPase	Cardinium	Sphingobacteriales	Sphingobacteriia	Scaffold72	70155-70339	Scaffold72:70155-70339	70155	70339	184	29	28	25	1	70197	70197	70339	70352	142	155	3	3	A0A345PN33	100	90.2	8.4	8.4	2.8999999999999999E-9	2.8999999999999999E-9	GGA	ATG	TAA	TAA
GAGA-0515.Scaffold8.1760778-1761241	GAGA-0515	Cardiocondyla obscurior	Myrmicinae	Xanthine-guanine phosphoribosyltransferase (XGPRT) (EC 2.4.2.22) (Xanthine phosphoribosyltransferase)	Cedecea_neteri	Enterobacterales	Gammaproteobacteria	Scaffold8	1760778-1761241	Scaffold8:1760778-1761241	1760778	1761241	463	57	54	53	1	1760778	1760758	1761241	1761273	463	515	18527	20062	A0A7C8GK68	97.4	87.7	98	98	NA	NA	GAC	GTG	CCG	TAA
GAGA-0520.Scaffold16.3576008-3576157	GAGA-0520	Melissotarsus emeryi	Myrmicinae	Peptidase A2 domain-containing protein	Wolbachia	Rickettsiales	Alphaproteobacteria	Scaffold16	3576008-3576157	Scaffold16:3576008-3576157	3576008	3576157	149	57	57	57	1	3576008	3576117	3576156	3576272	NA	NA	NA	NA	A0A059IVU6	100	NA	28.1	NA	8.5000000000000001E-17	NA	TAT	ATG	TAA	TGA
GAGA-0520.Scaffold78.416277-428304	GAGA-0520	Melissotarsus emeryi	Myrmicinae	Uncharacterized protein;Ankyrin_rpt-contain_dom domain-containing protein;Ankyrin repeat domain protein;Ankyrin repeat domain protein;NA	Wolbachia	Rickettsiales	Alphaproteobacteria	Scaffold78	416277-428304	Scaffold78:416277-428304	416277	428304	12027	18	31	8	5	417851;418094;420878;418905;420257	417851;418094;420878;418905;420257	418078;418303;428304;419108;420850	418078;418303;428281;419108;420850	NA;NA;NA;NA;NA	NA;NA;NA;NA;NA	NA;NA;NA;NA;NA	NA;NA;NA;NA;NA	A0A176Q261;A0A3B0IUX5;C0R3E9;C0R3E9;NA	48.0;89.9;99.7;94.0;NA	48.0;89.9;100.0;94.0;NA	5.3;9.2;99.4;2.6;NA	5.3;9.2;99.4;2.6;NA	9.2e-08;2.1e-15;NA;2.4e-16;NA	9.2e-08;2.1e-15;NA;2.4e-16;NA	TTG;ATG;TAA;TTG;TTG	TTG;ATG;ATG;TTG;TTG	TAA;TAA;TAA;TAA;TAG	TAA;TAA;TAA;TAA;TAG
GAGA-0521.Scaffold3.6208103-6209807	GAGA-0521	Myrmecia croslandi 2n=2	Myrmeciinae	Ankyrin repeat protein;Ankyrin repeat protein	Wolbachia	Rickettsiales	Alphaproteobacteria	Scaffold3	6208103-6209807	Scaffold3:6208103-6209807	6208103	6209807	1704	224	223	190	2	6209470;6208154	6209497;6208154	6209724;6209473	6209724;6209473	254;1319	227;1319	7;270	7;270	E9P653;E9P653	100.0;96.6	100.0;96.6	8.9;50.3	7.9;50.3	8.6e-30;2.1e-112	1.7e-25;2.1e-112	GTG;ATG	ATG;ATG	TAA;TGA	TAA;TGA
GAGA-0522.Scaffold3.6189080-6190784	GAGA-0522	Myrmecia croslandi 2n=4	Myrmeciinae	Ankyrin repeat protein;Ankyrin repeat protein	Wolbachia	Rickettsiales	Alphaproteobacteria	Scaffold3	6189080-6190784	Scaffold3:6189080-6190784	6189080	6190784	1704	135	127	113	2	6189131;6190447	6189131;6190474	6190450;6190701	6190450;6190701	1319;254	1319;227	83;0	83;0	E9P653;E9P653	96.6;100.0	96.6;100.0	50.3;8.9	50.3;7.9	2.1e-112;8.6e-30	2.1e-112;1.7e-25	ATG;GTG	ATG;ATG	TGA;TAA	TGA;TAA
GAGA-0524.Scaffold150.33548-38179	GAGA-0524	Lasius fuliginosus s1	Formicinae	Uncharacterized protein (Fragment);Ankyrin repeat protein;Ankyrin 3 (Ankyrin repeat family protein)	Wolbachia	Rickettsiales	Alphaproteobacteria	Scaffold150	33548-38179	Scaffold150:33548-38179	33548	38179	4631	54	26	18	3	33548;35751;37836	32987;35751;37836	35818;37793;38141	35818;37793;38141	2270;2042;305	2831;2042;305	2793;1352;703	5919;1352;703	A0A1Q3WAM0;E9P653;Q4EBI3	97.8;98.2;100.0	99.0;98.2;100.0	77.3;60.9;16.9	90.7;60.9;16.9	NA;2.5e-116;5.8e-34	NA;2.5e-116;5.8e-34	ATG;ATG;ATG	ATG;ATG;ATG	CTA;TGA;TAA	TAA;TGA;TAA
GAGA-0524.Scaffold200.91199-92069	GAGA-0524	Lasius fuliginosus s1	Myrmicinae	Ankyrin repeat protein	Wolbachia	Rickettsiales	Alphaproteobacteria	Scaffold200	91199-92069	Scaffold200:91199-92069	91199	92069	870	44	36	29	1	91515	91515	92069	92081	554	566	0	0	E9P653	90.2	88.3	20	20	5.5000000000000003E-45	5.8999999999999996E-45	TTA	GTG	TAA	TAA
GAGA-0524.Scaffold46.1162736-1164251	GAGA-0524	Lasius fuliginosus s1	Myrmicinae	Ankyrin repeat protein;Ankyrin 3 (Ankyrin repeat family protein)	Wolbachia	Rickettsiales	Alphaproteobacteria	Scaffold46	1162736-1164251	Scaffold46:1162736-1164251	1162736	1164251	1515	22	20	14	2	1162736;1163393	1162960;1163393	1163469;1164055	1163469;1164055	733;662	509;662	21;64	14;64	E9P653;Q4EBI3	92.6;92.7	89.3;92.7	20.5;31.9	24.5;31.9	2.8e-67;4.0e-48	1.6e-36;4.0e-48	TTC;ATG	ATG;ATG	TGA;TAA	TGA;TAA
GAGA-0524.Scaffold46.698693-699247	GAGA-0524	Lasius fuliginosus s1	Myrmicinae	Ankyrin 3 (Ankyrin repeat family protein)	Wolbachia	Rickettsiales	Alphaproteobacteria	Scaffold46	698693-699247	Scaffold46:698693-699247	698693	699247	554	33	41	33	1	698693	698447	699247	699910	554	1463	565	1682	Q4EBI3	100	91.8	29.3	60.6	1.8E-46	2.9E-105	GAA	ATG	GCT	TAA
GAGA-0524.Scaffold46.758791-760944	GAGA-0524	Lasius fuliginosus s1	Myrmicinae	Ankyrin 3 (Ankyrin repeat family protein);Ankyrin 3 (Ankyrin repeat family protein);Ankyrin 3 (Ankyrin repeat family protein)	Wolbachia	Rickettsiales	Alphaproteobacteria	Scaffold46	758791-760944	Scaffold46:758791-760944	758791	760944	2153	43	38	33	3	759835;760732;758791	759835;760732;758741	760650;760944;759388	760650;761757;759388	815;212;597	815;1025;647	111;34;55	111;82;72	Q4EBI3;Q4EBI3;Q4EBI3	75.6;100.0;98.5	75.6;99.4;92.6	32.6;11.3;30.5	32.6;52.0;31.0	6.6e-53;1.5e-18;6.8e-48	6.6e-53;1.8e-94;6.5e-48	GTG;GAA;GTG	GTG;ATG;GTG	TAG;TAA;CTA	TAG;TAA;TGA
GAGA-0524.Scaffold5.609468-609687	GAGA-0524	Lasius fuliginosus s1	Myrmicinae	hypothetical protein	Wolbachia	Rickettsiales	Alphaproteobacteria	Scaffold5	609468-609687	Scaffold5:609468-609687	609468	609687	219	26	26	26	1	609468	609421	609618	609618	150	197	0	0	NA	NA	NA	NA	NA	NA	NA	TAA	ATG	TGA	TGA
GAGA-0524.Scaffold92.139298-143433	GAGA-0524	Lasius fuliginosus s1	Myrmicinae	Ankyrin repeat protein	Wolbachia	Rickettsiales	Alphaproteobacteria	Scaffold92	139298-143433	Scaffold92:139298-143433	139298	143433	4135	27	61	20	1	139298	138487	143433	143439	4135	4952	1149	1323	E9P653	67.5	56.4	96.2	96.2	2.5999999999999999E-246	3.2000000000000001E-246	AAA	ATG	GTA	TAA
GAGA-0524.Scaffold92.200610-200775	GAGA-0524	Lasius fuliginosus s1	Myrmicinae	hypothetical protein	Wolbachia	Rickettsiales	Alphaproteobacteria	Scaffold92	200610-200775	Scaffold92:200610-200775	200610	200775	165	44	44	44	1	200658	NA	200775	NA	117	NA	282	NA	NA	NA	NA	NA	NA	NA	NA	ATG	NA	AAT	NA
GAGA-0524.Scaffold92.204150-204535	GAGA-0524	Lasius fuliginosus s1	Myrmicinae	Ankyrin 3 (Ankyrin repeat family protein)	Wolbachia	Rickettsiales	Alphaproteobacteria	Scaffold92	204150-204535	Scaffold92:204150-204535	204150	204535	385	44	44	43	1	204150	203222	204535	204586	385	1364	739	1789	Q4EBI3	98.4	65.599999999999994	20.3	29.5	1.1E-29	1.2E-81	AAA	ATG	CTG	TAG
GAGA-0527.Scaffold16.2537796-2538281	GAGA-0527	Tetramorium atratulum	Myrmicinae	hypothetical protein;hypothetical protein	Wolbachia	Rickettsiales	Alphaproteobacteria	Scaffold16	2537796-2538281	Scaffold16:2537796-2538281	2537796	2538281	485	90	89	86	2	2538217;2537796	NA;NA	2538281;2537884	NA;NA	64;88	NA;NA	0;0	NA;NA	NA;NA	NA;NA	NA;NA	NA;NA	NA;NA	NA;NA	NA;NA	ATA;CTG	NA;NA	TGA;TAA	NA;NA
GAGA-0527.Scaffold7.11475564-11475713	GAGA-0527	Tetramorium atratulum	Myrmicinae	hypothetical protein	Wolbachia	Rickettsiales	Alphaproteobacteria	Scaffold7	11475564-11475713	Scaffold7:11475564-11475713	11475564	11475713	149	73	73	72	1	11475564	NA	11475662	NA	98	NA	813	NA	NA	NA	NA	NA	NA	NA	NA	GAT	NA	TAA	NA
GAGA-0528.Scaffold112.336244-337570	GAGA-0528	Liometopum microcephalum	Dolichoderinae	Phosphoribosylformylglycinamidine_cyclo-ligase	Wolbachia	Rickettsiales	Alphaproteobacteria	Scaffold112	336244-337570	Scaffold112:336244-337570	336244	337570	1326	116	112	97	1	336629	336629	336751	336751	122	122	11	11	NA	NA	NA	NA	NA	NA	NA	ATG	ATG	TAA	TAA
GAGA-0528.Scaffold116.534097-534334	GAGA-0528	Liometopum microcephalum	Dolichoderinae	DDE_3 domain-containing protein	Wolbachia	Rickettsiales	Alphaproteobacteria	Scaffold116	534097-534334	Scaffold116:534097-534334	534097	534334	237	86	85	85	1	534202	NA	534334	NA	132	NA	576	NA	A0A178GTY8	95.3	NA	24	NA	3.4999999999999998E-7	NA	CAA	NA	TGA	NA
GAGA-0528.Scaffold184.102001-112532	GAGA-0528	Liometopum microcephalum	Dolichoderinae	Ankyrin repeat family protein;Ankyrin repeat family protein;Tetratricopeptide repeat protein;Tetratricopeptide repeat protein;Uncharacterized protein;Ankyrin repeat domain protein;Ankyrin repeat domain protein;Ankyrin repeat domain protein;Ankyrin repeat domain protein;Ankyrin repeat domain protein;Ankyrin domain protein (Fragment)	Wolbachia	Rickettsiales	Alphaproteobacteria	Scaffold184	102001-112532	Scaffold184:102001-112532	102001	112532	10531	80	68	4	11	111601;111936;105997;108690;107270;102283;108074;102608;107662;109818;111026	111601;111936;102283;107662;102608;109818;107270;101900;105997;108074;108690	111780;112415;106752;109772;107572;102618;108706;103315;108096;110165;111436	111780;112415;102618;108096;103315;110165;107572;102100;106752;108706;109772	179;479;755;1082;302;335;632;707;434;347;410	179;479;335;434;707;347;302;200;755;632;1082	0;0;6;0;0;0;0;3;0;0;2	0;0;0;0;3;0;0;0;6;0;0	A0A1V2N674;A0A1V2N674;A0A4Y6UMV0;A0A4Y6UMV0;A0A7V3UM90;C0R3E9;C0R3E9;C0R3E9;C0R3E9;C0R3E9;M1FXW0	94.9;100.0;96.4;97.5;98.0;100.0;98.6;93.6;97.9;84.3;67.6	94.9;100.0;100.0;97.9;93.6;84.3;98.0;75.8;96.4;98.6;97.5	7.3;12.9;12.3;17.9;29.3;4.4;8.3;8.9;5.7;3.9;16.0	7.3;12.9;4.4;5.7;8.9;3.9;29.3;2.0;12.3;8.3;17.9	1.6e-07;2.7e-36;1.2e-106;6.2e-157;8.4e-17;5.5e-29;9.0e-84;4.8e-93;1.9e-61;5.1e-38;1.9e-24	1.6e-07;2.7e-36;5.5e-29;1.9e-61;4.8e-93;5.1e-38;8.4e-17;4.7e-12;1.2e-106;9.0e-84;6.2e-157	TTG;GTG;ATG;GTG;TTG;ATG;ATG;TTG;ATG;ATG;ATG	TTG;GTG;ATG;ATG;TTG;ATG;TTG;ATG;ATG;ATG;GTG	TGA;TAA;TAG;TAG;TAA;TGA;TAA;TAA;TAG;TAA;TAA	TGA;TAA;TGA;TAG;TAA;TAA;TAA;TAA;TAG;TAA;TAG
GAGA-0528.Scaffold184.92153-94958	GAGA-0528	Liometopum microcephalum	Dolichoderinae	Uncharacterized protein GF1gp22 (Fragment);Ankyrin repeat domain protein;Ankyrin repeat domain protein	Wolbachia	Rickettsiales	Alphaproteobacteria	Scaffold184	92153-94958	Scaffold184:92153-94958	92153	94958	2805	95	84	62	3	93987;94785;93850	93987;94785;93850	94628;94949;94017	94628;94949;94017	641;164;167	641;164;167	5;2;0	5;2;0	B9A8X2;C0R3E9;C0R3E9	84.0;94.4;100.0	84.0;94.4;100.0	24.8;2.1;2.2	24.8;2.1;2.2	3.6e-75;3.2e-16;1.1e-13	3.6e-75;3.2e-16;1.1e-13	TTG;TTG;ATG	TTG;TTG;ATG	TGA;TAA;TAA	TGA;TAA;TAA
GAGA-0528.Scaffold19.823913-824593	GAGA-0528	Liometopum microcephalum	Dolichoderinae	Transposase	Wolbachia	Rickettsiales	Alphaproteobacteria	Scaffold19	823913-824593	Scaffold19:823913-824593	823913	824593	680	84	97	23	1	823913	823907	824416	824416	503	509	155	157	A0A178GYA7	72.5	71.599999999999895	43.6	43.6	6.0000000000000003E-55	5.8999999999999897E-55	TTT	TTG	TGA	TGA
GAGA-0528.Scaffold19.829974-830304	GAGA-0528	Liometopum microcephalum	Dolichoderinae	Ankyrin repeat family protein (Putative ankyrin-repeat protein, putative)	Wolbachia	Rickettsiales	Alphaproteobacteria	Scaffold19	829974-830304	Scaffold19:829974-830304	829974	830304	330	94	94	93	1	829974	828975	830304	830544	330	1569	119	614	Q4EAQ7	99.1	34.4	52.7	83.4	3.4999999999999999E-31	5.9999999999999998E-35	GTT	TTG	ATG	TAA
GAGA-0528.Scaffold335.55917-61131	GAGA-0528	Liometopum microcephalum	Dolichoderinae	Uncharacterized protein;Ankyrin repeat domain protein;Group II intron reverse transcriptase/maturase (EC 2.7.7.49) (Fragment);Uncharacterized protein;Uncharacterized protein;Uncharacterized protein;Uncharacterized protein;50S ribosomal protein L21;NA	Wolbachia	Rickettsiales	Alphaproteobacteria	Scaffold335	55917-61131	Scaffold335:55917-61131	55917	61131	5214	123	123	78	8	58065;58516;60473;59135;59525;57610;56690;56290;55924	58065;58516;60473;59135;59525;57610;56690;56290;55924	58472;59106;60610;59524;59812;57900;56977;56592;55997	58472;59106;60610;59524;59812;57900;56977;56592;55997	407;590;137;389;287;290;287;302;73	407;590;137;389;287;290;287;302;73	6;0;1;1;1;1;1;7;0	6;0;1;1;1;1;1;7;0	A0A178GSB7;A0A1V2N3T1;A0A519TI77;A0A5C0YSC8;A0A5C0YSC8;A0A6I6CJE7;A0A6I6CJE7;Q5GRT5;NA	88.9;98.5;88.9;96.9;89.5;97.9;76.8;100.0;NA	88.9;98.5;88.9;96.9;89.5;97.9;76.8;100.0;NA	11.6;34.2;14.7;11.7;8.0;10.1;8.0;100.0;NA	11.6;34.2;14.7;11.7;8.0;10.1;8.0;100.0;NA	1.1e-37;1.6e-78;6.7e-11;2.8e-20;7.8e-15;1.4e-32;5.4e-24;NA;NA	1.1e-37;1.6e-78;6.7e-11;2.8e-20;7.8e-15;1.4e-32;5.4e-24;NA;NA	ATG;ATG;ATG;ATG;ATG;TTG;ATG;ATG;NA	ATG;ATG;ATG;ATG;ATG;TTG;ATG;NA;NA	TGA;TAA;TGA;TAG;TAG;TAG;TGA;TAA;NA	TGA;TAA;TGA;TAG;TAG;TAG;TGA;NA;NA
GAGA-0528.Scaffold77.843994-852531	GAGA-0528	Liometopum microcephalum	Dolichoderinae	Ankyrin repeat domain protein;Ankyrin domain protein (Fragment);NA	Wolbachia	Rickettsiales	Alphaproteobacteria	Scaffold77	843994-852531	Scaffold77:843994-852531	843994	852531	8537	68	72	66	3	844103;852199;851880	844103;852199;851880	851476;852531;852041	851476;852552;852041	7373;332;161	7373;353;161	54490;8520;7750	54490;8886;7750	C0R3E9;M1FXW0;NA	100.0;87.4;NA	100.0;82.9;NA	99.3;17.6;NA	99.3;17.6;NA	NA;6.8e-19;NA	NA;6.9e-19;NA	ATG;GTG;ATG	ATG;GTG;ATG	TAA;CCA;TAG	TAA;TAA;TAG
GAGA-0528.Scaffold97.419863-420872	GAGA-0528	Liometopum microcephalum	Dolichoderinae	Putative phenazine biosynthesis protein	Sodalis	Enterobacterales	Gammaproteobacteria	Scaffold97	419863-420872	Scaffold97:419863-420872	419863	420872	1009	93	100	87	1	419986	419986	420867	420867	881	881	4212	4212	W0HPC4	100	100	100	100	NA	NA	ATG	ATG	TAG	TAG
GAGA-0530.Scaffold47.1008005-1010837	GAGA-0530	Pheidole yeensis	Myrmicinae	hypothetical protein	Spiroplasma	Entoplasmatales	Mollicutes	Scaffold47	1008005-1010837	Scaffold47:1008005-1010837	1008005	1010837	2832	20	18	10	1	1010551	1010551	1010715	1010715	164	164	0	0	NA	NA	NA	NA	NA	NA	NA	ATG	ATG	TAA	TAA
GAGA-0530.Scaffold50.1090423-1091032	GAGA-0530	Pheidole yeensis	Myrmicinae	hypothetical protein	Spiroplasma	Entoplasmatales	Mollicutes	Scaffold50	1090423-1091032	Scaffold50:1090423-1091032	1090423	1091032	609	51	52	51	1	1090742	1090742	1090906	1090906	164	164	0	0	NA	NA	NA	NA	NA	NA	NA	ATG	ATG	TAA	TAA
GAGA-0530.Scaffold57.356312-359111	GAGA-0530	Pheidole yeensis	Myrmicinae	Uncharacterized protein;Uncharacterized protein;NA;NA;NA	Spiroplasma	Entoplasmatales	Mollicutes	Scaffold57	356312-359111	Scaffold57:356312-359111	356312	359111	2799	58	57	51	5	358750;356312;357560;358332;357895	358750;356276;357560;358332;357895	358869;356479;357682;358481;358026	358869;356479;357682;358481;358026	119;167;122;149;131	119;203;122;149;131	0;4;0;0;4	0;4;0;0;4	A0A345DN46;A0A432ZWV5;NA;NA;NA	100.0;94.6;NA;NA;NA	100.0;79.1;NA;NA;NA	23.8;35.3;NA;NA;NA	23.8;35.3;NA;NA;NA	1.6e-07;4.5e-07;NA;NA;NA	1.6e-07;4.5e-07;NA;NA;NA	ATG;ATG;ATG;TTG;ATG	ATG;ATG;ATG;TTG;ATG	TGA;TAT;TAA;TGA;TAA	TGA;TAA;TAA;TGA;TAA
GAGA-0530.Scaffold67.265666-268498	GAGA-0530	Pheidole yeensis	Myrmicinae	hypothetical protein	Spiroplasma	Entoplasmatales	Mollicutes	Scaffold67	265666-268498	Scaffold67:265666-268498	265666	268498	2832	24	15	12	1	268212	268212	268376	268376	164	164	0	0	NA	NA	NA	NA	NA	NA	NA	ATG	ATG	TAA	TAA
GAGA-0531.Scaffold98.250591-254287	GAGA-0531	Aphaenogaster smythiesii	Myrmicinae	Ankyrin repeat domain protein	Wolbachia	Rickettsiales	Alphaproteobacteria	Scaffold98	250591-254287	Scaffold98:250591-254287	250591	254287	3696	32	36	30	1	251533	251533	254287	255287	2754	3754	170	209	B3CPR7	98.6	79.099999999999994	35.200000000000003	38.1	1.3E-158	5.6000000000000005E-171	ATG	ATG	AAT	ACC
GAGA-0532.Scaffold1.9613352-9613563	GAGA-0532	Lasius cf. alienus	Formicinae	hypothetical protein	Wolbachia	Rickettsiales	Alphaproteobacteria	Scaffold1	9613352-9613563	Scaffold1:9613352-9613563	9613352	9613563	211	31	30	30	1	9613352	9613302	9613563	9613565	211	263	0	0	NA	NA	NA	NA	NA	NA	NA	TAA	ATG	TAT	TAA
GAGA-0532.Scaffold143.210448-213452	GAGA-0532	Lasius cf. alienus	Formicinae	Ankyrin repeat protein	Wolbachia	Rickettsiales	Alphaproteobacteria	Scaffold143	210448-213452	Scaffold143:210448-213452	210448	213452	3004	41	61	28	1	210448	210441	213452	214334	3004	3893	254	298	E9P653	94.3	72.900000000000006	97.9	98.1	NA	4.3000000000000001E-259	GAA	ATG	GGT	TAA
GAGA-0532.Scaffold45.152124-155020	GAGA-0532	Lasius cf. alienus	Formicinae	Ankyrin repeat protein	Wolbachia	Rickettsiales	Alphaproteobacteria	Scaffold45	152124-155020	Scaffold45:152124-155020	152124	155020	2896	41	53	38	1	152124	152117	154975	154975	2851	2858	9	9	E9P653	75.599999999999994	75.400000000000006	69.599999999999994	69.599999999999994	9.9999999999999996E-247	9.9999999999999996E-247	ATG	ATG	GGT	TAA
GAGA-0532.Scaffold45.169507-169960	GAGA-0532	Lasius cf. alienus	Formicinae	Ankyrin 3 (Ankyrin repeat family protein)	Wolbachia	Rickettsiales	Alphaproteobacteria	Scaffold45	169507-169960	Scaffold45:169507-169960	169507	169960	453	69	68	68	1	169507	168508	169915	169915	408	1407	14	77	Q4EBI3	94.1	97	20.7	73.400000000000006	1.3E-49	1.6000000000000001E-121	ATG	ATG	ACG	CTG
GAGA-0532.Scaffold45.189258-192334	GAGA-0532	Lasius cf. alienus	Formicinae	Ankyrin repeat protein	Wolbachia	Rickettsiales	Alphaproteobacteria	Scaffold45	189258-192334	Scaffold45:189258-192334	189258	192334	3076	16	15	14	1	189258	188687	192289	192289	3031	3602	1052	1569	E9P653	82.1	69.099999999999994	81	81	NA	2.3999999999999999E-195	ATG	ATG	TAA	TAA
GAGA-0532.Scaffold45.243051-246395	GAGA-0532	Lasius cf. alienus	Formicinae	Ankyrin repeat protein	Wolbachia	Rickettsiales	Alphaproteobacteria	Scaffold45	243051-246395	Scaffold45:243051-246395	243051	246395	3344	29	29	28	1	243051	243012	246395	246899	3344	3887	3631	3954	E9P653	77	67.599999999999994	86.1	77.7	NA	6.5999999999999996E-207	AAA	ATG	CCT	TAA
GAGA-0532.Scaffold50.1005155-1008417	GAGA-0532	Lasius cf. alienus	Formicinae	Uncharacterized protein	Wolbachia	Rickettsiales	Alphaproteobacteria	Scaffold50	1005155-1008417	Scaffold50:1005155-1008417	1005155	1008417	3262	28	28	24	1	1005199	1005199	1008417	1008423	3218	3224	464	465	A0A2P1P8I2	93.4	93.3	80.2	80.2	NA	NA	ATG	ATG	GTA	TAA
GAGA-0532.Scaffold50.659470-660732	GAGA-0532	Lasius cf. alienus	Formicinae	Ankyrin 3 (Ankyrin repeat family protein)	Wolbachia	Rickettsiales	Alphaproteobacteria	Scaffold50	659470-660732	Scaffold50:659470-660732	659470	660732	1262	41	45	41	1	659470	659224	660687	660687	1217	1463	14	16	Q4EBI3	100	91.6	65	65.5	4.1000000000000003E-99	1.9E-104	ATG	ATG	GCT	TAA
GAGA-0532.Scaffold50.700078-702438	GAGA-0532	Lasius cf. alienus	Formicinae	Uncharacterized protein	Wolbachia	Rickettsiales	Alphaproteobacteria	Scaffold50	700078-702438	Scaffold50:700078-702438	700078	702438	2360	33	32	30	1	700078	699451	702438	703251	2360	3800	2216	4117	A0A2P1P8I2	99.7	82.6	78	75.900000000000006	NA	NA	GAA	ATG	GCT	TAA
GAGA-0532.Scaffold73.609296-610495	GAGA-0532	Lasius cf. alienus	Formicinae	Ankyrin 3 (Ankyrin repeat family protein)	Wolbachia	Rickettsiales	Alphaproteobacteria	Scaffold73	609296-610495	Scaffold73:609296-610495	609296	610495	1199	23	34	21	1	609296	609296	609775	609775	479	479	0	0	Q4EBI3	81.8	81.8	21.1	21.1	1E-35	1E-35	TAT	AAG	TAA	TAA
GAGA-0532.Scaffold79.28117-28512	GAGA-0532	Lasius cf. alienus	Formicinae	Ribonuclease 3 (EC 3.1.26.3) (Ribonuclease III) (RNase III)	Wolbachia	Rickettsiales	Alphaproteobacteria	Scaffold79	28117-28512	Scaffold79:28117-28512	28117	28512	395	41	27	27	1	28117	27812	28512	28528	395	716	0	0	I7IHV0	100	92.9	56.6	97	3.8999999999999999E-38	NA	CGA	GTG	ATG	TGA
GAGA-0533.Scaffold25.1172728-1173697	GAGA-0533	Carebara sp. s1	Myrmicinae	Lyzozyme M1	Wolbachia	Rickettsiales	Alphaproteobacteria	Scaffold25	1172728-1173697	Scaffold25:1172728-1173697	1172728	1173697	969	75	78	65	1	1173035	1173035	1173184	1173184	149	149	1682	1682	M9WWV9	91.8	91.8	23.6	23.6	5.9000000000000003E-10	5.9000000000000003E-10	ATG	ATG	TAG	TAG
GAGA-0538.Scaffold6.9030718-9031968	GAGA-0538	Sericomyrmex mayri	Myrmicinae	Potassium uptake protein KtrB;NA;NA	Spiroplasma	Entoplasmatales	Mollicutes	Scaffold6	9030718-9031968	Scaffold6:9030718-9031968	9030718	9031968	1250	33	29	27	3	9031595;9031776;9030718	9031595;9031776;NA	9031774;9031940;9030831	9031774;9031940;NA	179;164;113	179;164;NA	25;1;83	25;1;NA	A0A0H3XL32;NA;NA	98.3;NA;NA	98.3;NA;NA	12.2;NA;NA	12.2;NA;NA	2.5e-08;NA;NA	2.5e-08;NA;NA	ATG;TTG;ATA	ATG;TTG;NA	TGA;TAG;TAA	TGA;TAG;NA
GAGA-0540.Scaffold154.416303-416585	GAGA-0540	Myrmicocrypta squomosa	Myrmicinae	Uncharacterized protein	Wolbachia	Rickettsiales	Alphaproteobacteria	Scaffold154	416303-416585	Scaffold154:416303-416585	416303	416585	282	21	21	21	1	416303	415469	416585	417585	282	2116	218	1043	A0A4Y6UL79	100	95.5	5.3	37.9	9.2000000000000002E-32	9.7999999999999998E-228	AGT	ATA	GTT	TAA
GAGA-0543.Scaffold14.1894874-1897946	GAGA-0543	Kalathomyrmex emeryi	Myrmicinae	DNA helicase (EC 3.6.4.12)	Wolbachia	Rickettsiales	Alphaproteobacteria	Scaffold14	1894874-1897946	Scaffold14:1894874-1897946	1894874	1897946	3072	64	58	55	1	1895964	1895964	1897946	1897877	1982	1913	5712	5701	B3CMH9	95.6	99.1	99.5	99.5	NA	NA	ACA	helicase	TAG	ATG
GAGA-0543.Scaffold14.3802939-3804257	GAGA-0543	Kalathomyrmex emeryi	Myrmicinae	Thioredoxin;3'-5' exonuclease domain-containing protein;NA	Wolbachia	Rickettsiales	Alphaproteobacteria	Scaffold14	3802939-3804257	Scaffold14:3802939-3804257	3802939	3804257	1318	55	51	47	2	3803684;3804031;3803480	3803684;3804031;3803480	3803920;3804257;3803555	3803920;3804150;3803555	236;226;75	236;119;75	7;1;3	7;1;3	A0A060Q4L5;A0A1A9VKD0;NA	89.7;100.0;NA	89.7;100.0;NA	65.4;30.5;NA	65.4;16.0;NA	5.9e-26;1.1e-32;NA	5.9e-26;1.6e-12;NA	ATG;AGC;NA	ATG;ATG;NA	TAA;TAG;NA	TAA;TAG;NA
GAGA-0578.Scaffold21.4767189-4768777	GAGA-0578	Carebara cf. capreola	Myrmicinae	hypothetical protein;hypothetical protein	Wolbachia	Rickettsiales	Alphaproteobacteria	Scaffold21	4767189-4768777	Scaffold21:4767189-4768777	4767189	4768777	1588	52	43	40	2	4768640;4768005	4768640;4768005	4768777;4768163	4768777;4768163	137;158	137;158	30;251	30;251	NA;NA	NA;NA	NA;NA	NA;NA	NA;NA	NA;NA	NA;NA	CAA;TTG	AAA;TTG	TAA;TAA	TAG;TAA
GAGA-0578.Scaffold3.7430181-7431567	GAGA-0578	Carebara cf. capreola	Myrmicinae	DUF1016 family protein;NA	Wolbachia	Rickettsiales	Alphaproteobacteria	Scaffold3	7430181-7431567	Scaffold3:7430181-7431567	7430181	7431567	1386	58	52	48	2	7430233;7431494	7430233;NA	7430847;7431567	7430847;NA	614;73	614;NA	868;190	868;NA	A0A6H2NU06;NA	98.5;NA	98.5;NA	36.3;NA	36.3;NA	1.7e-92;NA	1.7e-92;NA	ATG;ATG	ATG;NA	TAA;TGA	TAA;NA
GAGA-0578.Scaffold3.8563261-8563511	GAGA-0578	Carebara cf. capreola	Myrmicinae	Uncharacterized protein;NA	Wolbachia	Rickettsiales	Alphaproteobacteria	Scaffold3	8563261-8563511	Scaffold3:8563261-8563511	8563261	8563511	250	112	112	112	2	8563261;8563386	NA;8563386	8563365;8563511	NA;8563541	104;125	NA;155	7;19	NA;23	A0A098AR21;NA	100.0;NA	NA;NA	6.3;NA	NA;NA	2.4e-11;NA	NA;NA	TTG;CTG	TTG;NA	TGC;TAA	TAA;NA
GAGA-0579.Scaffold13.389277-389689	GAGA-0579	Carebara melasolena	Myrmicinae	hypothetical protein	Wolbachia	Rickettsiales	Alphaproteobacteria	Scaffold13	389277-389689	Scaffold13:389277-389689	389277	389689	412	77	76	75	1	389277	NA	389363	NA	86	NA	46	NA	NA	NA	NA	NA	NA	NA	NA	ATG	NA	CCT	NA
GAGA-0579.Scaffold2.762140-763897	GAGA-0579	Carebara melasolena	Myrmicinae	Glycosyl hydrolases 25 family protein (Lysozyme) (EC 3.2.1.17);NA	Wolbachia	Rickettsiales	Alphaproteobacteria	Scaffold2	762140-763897	Scaffold2:762140-763897	762140	763897	1757	71	68	63	2	763194;762140	763194;NA	763511;762248	763511;NA	317;108	317;NA	545;75	545;NA	Q4EDF3;NA	97.1;NA	97.1;NA	44.2;NA	44.2;NA	7.2e-37;NA	7.2e-37;NA	ATG;TGG	ATG;NA	TGA;TAA	TGA;NA
NCBI-0001.NC_039507.1.9151666-9159190	NCBI-0001	Ooceraea biroi	Dorylinae	Ankyrin repeat domain protein	Wolbachia	Rickettsiales	Alphaproteobacteria	NC_039507_1	9151666-9159190	NC_039507.1:9151666-9159190	9151666	9159190	7524	43	33	0	1	9151666	9151678	9159081	9159081	7415	7403	7468	7432	C0R3E9	99.8	100	99.4	99.4	NA	NA	TTA	GTG	TAA	TAA
NCBI-0001.NC_039510.1.8165147-8166527	NCBI-0001	Ooceraea biroi	Dorylinae	tRNA-specific 2-thiouridylase MnmA (EC 2.8.1.13);NA	Spiroplasma;Mycoplasma	Entomoplasmatales	Mollicutes	NC_039510_1	8165147-8166527	NC_039510.1:8165147-8166527	8165147	8166527	1380	32	30	14	2	8166096;8166434	8166096;8166434	8166356;8166527	8166356;8166613	260;93	260;179	4;0	4;0	W0GPQ5;NA	100.0;NA	100.0;NA	22.8;NA	22.8;NA	8.0e-28;NA	8.0e-28;NA	ATG;ATG	ATG;ATG	TAG;ATC	TAG;TAG
NCBI-0001.NC_039514.1.14453373-14460770	NCBI-0001	Ooceraea biroi	Dorylinae	Uncharacterized protein GF1gp22 (Fragment);Ankyrin repeat domain protein	Wolbachia	Rickettsiales	Alphaproteobacteria	NC_039514_1	14453373-14460770	NC_039514.1:14453373-14460770	14453373	14460770	7397	43	53	1	2	14458601;14453373	14458601;14453367	14460770;14458508	14460961;14458508	2169;5135	2360;5141	214;643	253;645	B9A8X2;C0R3E9	93.8;100.0	86.3;99.9	93.9;68.9	94.1;68.9	NA;0.0e+00	NA;0.0e+00	GCA;ATG	ATG;ATG	TGA;TTA	TGA;TAA
NCBI-0001.NC_039514.1.14464149-14471566	NCBI-0001	Ooceraea biroi	Dorylinae	Tetratricopeptide repeat protein;Uncharacterized protein GF1gp22 (Fragment);Ankyrin repeat domain protein	Wolbachia	Rickettsiales	Alphaproteobacteria	NC_039514_1	14464149-14471566	NC_039514.1:14464149-14471566	14464149	14471566	7417	36	44	1	3	14468135;14469976;14464187	14468135;14469976;14464187	14469979;14471566;14468113	14469979;14471757;14468113	1844;1590;3926	1844;1781;3926	341;61;537	341;78;537	A0A4Y6UMV0;B9A8X2;C0R3E9	98.9;96.8;100.0	98.9;87.7;100.0	30.9;71.4;52.8	30.9;72.3;52.8	1.5e-224;1.9e-201;0.0e+00	1.5e-224;1.7e-201;0.0e+00	ATG;GCA;GTG	ATG;ATG;GTG	TAA;TGA;TAA	TAA;TGA;TAA
NCBI-0001.NC_039514.1.3187867-3188331	NCBI-0001	Ooceraea biroi	Dorylinae	Ankyrin repeat domain protein	Wolbachia	Rickettsiales	Alphaproteobacteria	NC_039514_1	3187867-3188331	NC_039514.1:3187867-3188331	3187867	3188331	464	36	34	30	1	3187947	3187947	3188331	3188339	384	392	46	46	C0R3E9	100	97.7	5.0999999999999996	5.0999999999999996	3.9E-43	4.0000000000000003E-43	TAA	ATG	TAA	TAA
NCBI-0001.NC_039514.1.3191189-3197972	NCBI-0001	Ooceraea biroi	Dorylinae	Tetratricopeptide repeat protein;Uncharacterized protein GF1gp22 (Fragment);Ankyrin repeat domain protein;Ankyrin repeat domain protein;Ankyrin repeat domain protein	Wolbachia	Rickettsiales	Alphaproteobacteria	NC_039514_1	3191189-3197972	NC_039514.1:3191189-3197972	3191189	3197972	6783	39	37	3	5	3195236;3195823;3191189;3192485;3192692	3195236;3195823;3191147;3192485;3192692	3195922;3197709;3192475;3192691;3195232	3195922;3197709;3192475;3192691;3195232	686;1886;1286;206;2540	686;1886;1328;206;2540	88;319;66;8;197	88;319;67;8;197	A0A4Y6UMV0;B9A8X2;C0R3E9;C0R3E9;C0R3E9	98.7;95.2;99.8;95.6;93.3	98.7;95.2;96.4;95.6;93.3	11.5;83.1;17.3;4.0;87.0	11.5;83.1;17.3;4.0;87.0	1.1e-70;NA;1.8e-164;2.7e-15;NA	1.1e-70;NA;1.2e-163;2.7e-15;NA	ATG;TTG;GTG;TTG;TTG	ATG;TTG;GTG;TTG;TTG	TAA;TAA;AGA;TAA;TAA	TAA;TAA;TAG;TAA;TAA
NCBI-0001.NC_039514.1.3213125-3220515	NCBI-0001	Ooceraea biroi	Dorylinae	Ankyrin repeat domain protein	Wolbachia	Rickettsiales	Alphaproteobacteria	NC_039514_1	3213125-3220515	NC_039514.1:3213125-3220515	3213125	3220515	7390	23	33	0	1	3213213	3213213	3220515	3220700	7302	7487	2061	2159	C0R3E9	99.9	97.4	99.4	99.4	NA	NA	AGA	ATG	TAA	TAA
NCBI-0001.NC_039514.1.3314067-3321474	NCBI-0001	Ooceraea biroi	Dorylinae	Ankyrin repeat domain protein	Wolbachia	Rickettsiales	Alphaproteobacteria	NC_039514_1	3314067-3321474	NC_039514.1:3314067-3321474	3314067	3321474	7407	35	34	1	1	3314067	3314061	3321474	3321659	7407	7598	52771	55480	C0R3E9	99.9	97.4	99.4	99.4	NA	NA	AGA	ATG	TTA	TAA
NCBI-0001.NC_039514.1.340615-347432	NCBI-0001	Ooceraea biroi	Dorylinae	Ankyrin repeat domain protein	Wolbachia	Rickettsiales	Alphaproteobacteria	NC_039514_1	340615-347432	NC_039514.1:340615-347432	340615	347432	6817	43	25	2	1	340615	340620	347432	347432	6817	6812	51913	51789	C0R3E9	100	100	91.9	91.9	NA	NA	GGT	GTG	TAA	TAA
NCBI-0001.NC_039516.1.740424-747898	NCBI-0001	Ooceraea biroi	Dorylinae	Ankyrin repeat domain protein	Wolbachia	Rickettsiales	Alphaproteobacteria	NC_039516_1	740424-747898	NC_039516.1:740424-747898	740424	747898	7474	43	52	4	1	740510	740510	747898	748051	7388	7541	1662	1724	C0R3E9	99.8	97.8	99.4	99.4	NA	NA	GAG	ATG	TAA	TAA
NCBI-0002.CM021181.1.15964575-15972207	NCBI-0002	Solenopsis invicta	Myrmicinae	Ankyrin repeat domain protein	Wolbachia	Rickettsiales	Alphaproteobacteria	CM021181_1	15964575-15972207	CM021181.1:15964575-15972207	15964575	15972207	7632	22	77	11	1	15964575	15964563	15971849	15971849	7274	7286	2506	2506	C0R3E9	100	99.8	97.7	97.7	NA	NA	ATA	TTG	TAA	TAA
NCBI-0005.NW_020229769.1.103912-105724	NCBI-0005	Camponotus floridanus	Formicinae	N-acetylmuramic acid 6-phosphate etherase (MurNAc-6-P etherase) (EC 4.2.1.126) (N-acetylmuramic acid 6-phosphate hydrolase) (N-acetylmuramic acid 6-phosphate lyase);NA	Mycoplasma;Spiroplasma	Entomoplasmatales	Mollicutes	NW_020229769_1	103912-105724	NW_020229769.1:103912-105724	103912	105724	1812	31	25	19	2	104332;103912	104332;NA	105240;104024	105240;NA	908;112	908;NA	1286;217	1286;NA	A0A0H3XH70;NA	98.7;NA	98.7;NA	99.0;NA	99.0;NA	NA;NA	NA;NA	ATG;CTA	ATG;NA	TAA;TAA	TAA;NA
OUT-0001.CM020807.1.1897397-1898202	OUT-0001	Formica selysi	Formicinae	Uncharacterized protein;NA	Wolbachia	Rickettsiales	Alphaproteobacteria	CM020807_1	1897397-1898202	CM020807.1:1897397-1898202	1897397	1898202	805	54	50	44	2	1897397;1898143	1897615;NA	1897779;1898202	1897779;NA	382;59	164;NA	1;0	1;NA	Q4EAJ0;NA	100.0;NA	100.0;NA	46.2;NA	19.8;NA	3.0e-67;NA	7.8e-23;NA	CTA;ACC	TTG;NA	TAG;TGA	TAG;NA
OUT-0001.CM020807.1.5579930-5580828	OUT-0001	Formica selysi	Formicinae	Uncharacterized protein	Wolbachia	Rickettsiales	Alphaproteobacteria	CM020807_1	5579930-5580828	CM020807.1:5579930-5580828	5579930	5580828	898	66	68	61	1	5580121	5580121	5580786	5580786	665	665	0	0	Q4EAJ0	97.7	97.7	85	85	NA	NA	ATG	ATG	TAG	TAG
OUT-0001.CM020808.1.1376398-1377617	OUT-0001	Formica selysi	Formicinae	Cyclopropane fatty acyl phospholipid synthase (EC 2.1.1.79)	Sodalis	Enterobacterales	Gammaproteobacteria	CM020808_1	1376398-1377617	CM020808.1:1376398-1377617	1376398	1377617	1219	63	65	57	1	1376460	1376460	1377608	1377608	1148	1148	8	8	A0A151ULI1	100	100	100	100	NA	NA	ATG	ATG	TGA	TGA
OUT-0001.CM020808.1.166507-167308	OUT-0001	Formica selysi	Formicinae	Uncharacterized protein;NA	Spiroplasma_sp.	Entoplasmatales	Mollicutes	CM020808_1	166507-167308	CM020808.1:166507-167308	166507	167308	801	51	50	48	2	166629;167176	166629;167176	166754;167308	166754;167310	125;132	125;134	0;0	0;0	A0A433EQ38;NA	100.0;NA	100.0;NA	5.6;NA	5.6;NA	1.6e-12;NA	1.6e-12;NA	ATG;GTT	ATG;TTG	TGA;TAA	TGA;TAA
OUT-0001.CM020810.1.304118-308835	OUT-0001	Formica selysi	Formicinae	Cyclopropane fatty acyl phospholipid synthase (EC 2.1.1.79);Cyclopropane fatty acyl phospholipid synthase (EC 2.1.1.79);NA;NA;NA	Klebsiella_varicola;Shigella_flexneri	Enterobacterales	Gammaproteobacteria	CM020810_1	304118-308835	CM020810.1:304118-308835	304118	308835	4717	43	28	21	5	307131;304118;305774;304640;308627	307131;304001;305774;304640;308627	308093;304567;305905;304819;308806	308093;304708;305905;304819;308806	962;449;131;179;179	962;707;131;179;179	0;0;0;0;0	0;0;0;0;0	A0A151ULI1;A0A151ULI1;NA;NA;NA	95.3;92.0;NA;NA;NA	95.3;78.7;NA;NA;NA	79.9;36.0;NA;NA;NA	79.9;48.3;NA;NA;NA	NA;2.3e-62;NA;NA;NA	NA;3.0e-87;NA;NA;NA	ATG;ATG;GTG;ATG;ATG	ATG;TTG;GTG;ATG;ATG	TAA;CCA;TGA;TAA;TAA	TAA;TAA;TGA;TAA;TAA
OUT-0001.CM020810.1.311254-320250	OUT-0001	Formica selysi	Formicinae	Cyclopropane fatty acyl phospholipid synthase (EC 2.1.1.79);Cyclopropane fatty acyl phospholipid synthase (EC 2.1.1.79);Cyclopropane fatty acyl phospholipid synthase (EC 2.1.1.79);NA;NA;NA;NA;NA	Shigella flexneri	Enterobacterales	Gammaproteobacteria	CM020810_1	311254-320250	CM020810.1:311254-320250	311254	320250	8996	33	35	8	8	311517;319490;315503;317681;314147;313013;313695;318133	311517;319490;315503;317681;314147;313013;313695;318133	312479;320250;316465;317890;314278;313192;313904;318264	312479;320341;316465;317890;314278;313192;313904;318264	962;760;962;209;131;179;209;131	962;851;962;209;131;179;209;131	0;0;0;0;0;0;0;0	0;0;0;0;0;0;0;0	A0A151ULI1;A0A151ULI1;A0A151ULI1;NA;NA;NA;NA;NA	95.3;99.6;95.3;NA;NA;NA;NA;NA	95.3;90.8;95.3;NA;NA;NA;NA;NA	79.9;66.1;79.9;NA;NA;NA;NA;NA	79.9;67.4;79.9;NA;NA;NA;NA;NA	NA;2.4e-115;NA;NA;NA;NA;NA;NA	NA;2.3e-115;NA;NA;NA;NA;NA;NA	ATG;ATG;ATG;ATG;GTG;ATG;ATG;GTG	ATG;ATG;ATG;ATG;GTG;ATG;ATG;GTG	TAA;TCT;TAA;TAA;TGA;TAA;TAA;TGA	TAA;TAA;TAA;TAA;TGA;TAA;TAA;TGA
OUT-0001.CM020815.1.6441834-6442103	OUT-0001	Formica selysi	Formicinae	hypothetical protein	Spiroplasma	Entoplasmatales	Mollicutes	CM020815_1	6441834-6442103	CM020815.1:6441834-6442103	6441834	6442103	269	60	61	59	1	6442034	NA	6442103	NA	69	NA	11	NA	NA	NA	NA	NA	NA	NA	NA	AAT	NA	TAA	NA
OUT-0001.CM020819.1.5842557-5846272	OUT-0001	Formica selysi	Formicinae	Uncharacterized protein (Fragment);Cyclopropane-fatty-acyl-phospholipid synthase (EC 2.1.1.79);Cyclopropane-fatty-acyl-phospholipid synthase (EC 2.1.1.79);NA;NA	Cronobacter_sakazaki	Enterobacterales	Gammaproteobacteria	CM020819_1	5842557-5846272	CM020819.1:5842557-5846272	5842557	5846272	3715	67	65	48	5	5843636;5843031;5846074;5842557;5844939	5843636;5843031;5846074;NA;5844939	5845039;5843279;5846272;5842747;5845334	5845039;5843279;5846322;NA;5845334	1403;248;198;190;395	1403;248;248;NA;395	23;12;4;4;21	23;12;4;NA;21	A0A3C1RZY0;E6WDG8;E6WDG8;NA;NA	52.7;76.8;96.9;NA;NA	52.7;76.8;76.8;NA;NA	84.0;16.5;16.5;NA;NA	84.0;16.5;16.5;NA;NA	1.6e-12;5.4e-24;1.2e-23;NA;NA	1.6e-12;5.4e-24;5.4e-24;NA;NA	GTG;TTG;AAT;AGC;ATG	GTG;TTG;TTG;NA;ATG	TAG;TAA;TAA;TAA;TAA	TAG;TAA;TAA;NA;TAA
OUT-0001.CM020829.1.3349325-3349575	OUT-0001	Formica selysi	Formicinae	Ribosomal RNA small subunit methyltransferase A (EC 2.1.1.182) (16S rRNA (adenine(1518)-N(6)/adenine(1519)-N(6))-dimethyltransferase) (16S rRNA dimethyladenosine transferase) (16S rRNA dimethylase) (S-adenosylmethionine-6-N', N'-adenosyl(rRNA) dimethyltransferase)	Spiroplasma	Entoplasmatales	Mollicutes	CM020829_1	3349325-3349575	CM020829.1:3349325-3349575	3349325	3349575	250	65	64	62	1	3349325	3349289	3349543	3349543	218	254	0	0	W0GSI6	94.5	89.3	24.6	29.2	2.9999999999999999E-22	1E-22	GTG	GTG	GAA	TAA
OUT-0001.WHNR01000088.1.32800-34183	OUT-0001	Formica selysi	Formicinae	Cyclopropane fatty acyl phospholipid synthase (EC 2.1.1.79);Cyclopropane-fatty-acyl-phospholipid synthase	Serratia_proteamacul	Enterobacterales	Gammaproteobacteria	WHNR01000088_1	32800-34183	WHNR01000088.1:32800-34183	32800	34183	1383	41	44	37	2	32809;33620	32809;33620	33489;33913	33456;33913	680;293	647;293	0;0	0;0	A0A151ULI1;A0A4R3Z3L5	100.0;84.5	100.0;84.5	59.0;21.4	56.1;21.4	1.6e-111;6.5e-33	1.5e-105;6.5e-33	ATG;ATG	ATG;ATG	TGA;TAA	TGA;TAA
OUT-0002.Scaffold1.173150-173918	OUT-0002	Formica cinerea	Formicinae	hypothetical protein;hypothetical protein	Spiroplasma	Entoplasmatales	Mollicutes	Scaffold1	173150-173918	Scaffold1:173150-173918	173150	173918	768	83	83	78	2	173801;173584	NA;173584	173918;173763	NA;173763	117;179	NA;179	0;0	NA;0	NA;NA	NA;NA	NA;NA	NA;NA	NA;NA	NA;NA	NA;NA	GTT;TTG	NA;TTG	TGA;TAG	NA;TAG
OUT-0002.Scaffold13.1195512-1196725	OUT-0002	Formica cinerea	Formicinae	Cyclopropane fatty acyl phospholipid synthase (EC 2.1.1.79);Cyclopropane fatty acyl phospholipid synthase (EC 2.1.1.79)	Sodalis	Enterobacterales	Gammaproteobacteria	Scaffold13	1195512-1196725	Scaffold13:1195512-1196725	1195512	1196725	1213	71	74	68	2	1196066;1195719	1195821;1195821	1196674;1196069	1196000;1196000	608;350	179;179	3;0	0;0	A0A151ULI1;H8NWV1	68.3;100.0	NA;NA	36.0;30.5	NA;NA	3.0e-62;6.6e-46	NA;NA	ATG;GTG	ATG;ATG	TGA;TGA	TAA;TAA
OUT-0002.Scaffold13.1199847-1201065	OUT-0002	Formica cinerea	Formicinae	Cyclopropane fatty acyl phospholipid synthase (EC 2.1.1.79);NA;NA	Sodalis	Enterobacterales	Gammaproteobacteria	Scaffold13	1199847-1201065	Scaffold13:1199847-1201065	1199847	1201065	1218	87	88	81	3	1200402;1200157;1200874	1200157;1199909;1200402	1200737;1200336;1201065	1200336;1200205;1200737	335;179;191	179;296;335	0;0;2	0;0;0	A0A151ULI1;NA;NA	100.0;NA;NA	NA;77.6;100.0	29.0;NA;NA	NA;19.8;29.0	2.6e-47;NA;NA	NA;7.4e-29;2.6e-47	ATG;ATG;GAG	ATG;ATG;ATG	TAG;TAA;TAA	TAA;TAA;TAG
OUT-0002.Scaffold13.1204192-1205409	OUT-0002	Formica cinerea	Formicinae	Cyclopropane fatty acyl phospholipid synthase (EC 2.1.1.79);Cyclopropane-fatty-acyl-phospholipid synthase;Cyclopropane-fatty-acyl-phospholipid synthase;NA	Sodalis	Enterobacterales	Gammaproteobacteria	Scaffold13	1204192-1205409	Scaffold13:1204192-1205409	1204192	1205409	1217	89	90	85	4	1204746;1205212;1204254;1204501	1204746;NA;1204254;1204501	1205081;1205409;1204511;1204680	1205081;NA;1204511;1204680	335;197;257;179	335;NA;257;179	0;0;0;0	0;0;0;0	A0A151ULI1;A0A2N5ESX5;A0A4R3Z3L5;NA	100.0;97.0;95.3;NA	100.0;NA;95.3;NA	29.0;16.7;21.1;NA	29.0;NA;21.1;NA	3.5e-47;8.3e-25;3.6e-28;NA	3.5e-47;NA;3.6e-28;NA	ATG;TTG;ATG;ATG	ATG;NA;ATG;ATG	TAG;CTC;TAA;TAA	TAG;NA;TAA;TAA
OUT-0002.Scaffold14.831336-831605	OUT-0002	Formica cinerea	Formicinae	hypothetical protein	Spiroplasma	Entoplasmatales	Mollicutes	Scaffold14	831336-831605	Scaffold14:831336-831605	831336	831605	269	104	93	76	1	831336	NA	831404	NA	68	NA	3	NA	NA	NA	NA	NA	NA	NA	NA	ATT	NA	TAA	NA
OUT-0002.Scaffold21.1673684-1673934	OUT-0002	Formica cinerea	Formicinae	Ribosomal RNA small subunit methyltransferase A (EC 2.1.1.182) (16S rRNA (adenine(1518)-N(6)/adenine(1519)-N(6))-dimethyltransferase) (16S rRNA dimethyladenosine transferase) (16S rRNA dimethylase) (S-adenosylmethionine-6-N', N'-adenosyl(rRNA) dimethyltransferase)	Spiroplasma	Entoplasmatales	Mollicutes	Scaffold21	1673684-1673934	Scaffold21:1673684-1673934	1673684	1673934	250	64	64	63	1	1673684	1673648	1673902	1673902	218	254	0	0	W0GSI6	94.5	89.3	24.6	29.2	8.6999999999999996E-22	2.9999999999999999E-22	GTG	GTG	GAA	TAA
OUT-0002.Scaffold3.1911484-1912377	OUT-0002	Formica cinerea	Formicinae	Uncharacterized protein;NA	Wolbachia	Rickettsiales	Alphaproteobacteria	Scaffold3	1911484-1912377	Scaffold3:1911484-1912377	1911484	1912377	893	144	145	141	2	1911484;1912318	1911520;NA	1912185;1912377	1912185;NA	701;59	665;NA	484;33	444;NA	Q73I80;NA	97.9;NA	97.7;NA	76.6;NA	85.0;NA	NA;NA	NA;NA	TGT;ACC	ATG;NA	TAG;TGA	TAG;NA
OUT-0002.Scaffold4.8855059-8856542	OUT-0002	Formica cinerea	Formicinae	Cyclopropane fatty acyl phospholipid synthase (EC 2.1.1.79);NA	Yersinia	Enterobacterales	Gammaproteobacteria	Scaffold4	8855059-8856542	Scaffold4:8855059-8856542	8855059	8856542	1483	111	88	78	2	8855800;8855087	8855800;8855087	8856542;8855266	8856261;8855266	742;179	461;179	0;0	0;0	A0A151ULI1;NA	93.5;NA	90.2;NA	60.3;NA	36.0;NA	1.6e-105;NA	6.3e-65;NA	CAT;ATG	ATG;ATG	TAA;TAA	TAA;TAA
OUT-0002.Scaffold5.1001991-1005871	OUT-0002	Formica cinerea	Formicinae	Uncharacterized protein;Uncharacterized protein;Uncharacterized protein (Fragment);Uncharacterized protein (Fragment);Uncharacterized protein (Fragment);Uncharacterized protein;NA;NA;NA;NA	Spiroplasma	Entoplasmatales	Mollicutes	Scaffold5	1001991-1005871	Scaffold5:1001991-1005871	1001991	1005871	3880	6	6	5	10	1005356;1002557;1002896;1001997;1004669;1005698;1003979;1004255;1003835;1004134	1005698;1002557;1002896;1001997;1005356;NA;1004134;1004669;1003835;1004255	1005658;1002775;1003105;1002557;1005031;1005871;1004104;1004386;1003954;1004283	1005901;1002775;1003105;1002557;1005658;NA;1004283;1005031;1003954;1004386	302;218;209;560;362;173;125;131;119;149	203;218;209;560;302;NA;149;362;119;131	20;1;11;18;47;30;23;40;14;26	31;1;11;18;20;NA;27;47;22;40	A0A2P6FGA1;A0A2S8NPZ7;A0A3S0RCN7;A0A3S0RCR2;A0A432ZV11;A0A432ZVN8;NA;NA;NA;NA	100.0;91.7;100.0;100.0;86.7;98.2;NA;NA;NA;NA	98.5;91.7;100.0;100.0;100.0;NA;NA;86.7;NA;NA	19.2;43.1;22.1;47.9;27.5;20.1;NA;NA;NA;NA	23.7;43.1;22.1;47.9;19.2;NA;NA;27.5;NA;NA	6.8e-35;2.2e-25;1.4e-30;2.4e-91;1.7e-30;2.4e-19;NA;NA;NA;NA	1.8e-19;2.2e-25;1.4e-30;2.4e-91;6.8e-35;NA;NA;1.7e-30;NA;NA	TTG;ATG;ATG;ATG;ATG;TTT;ATG;ATG;ATG;ATG	GTG;ATG;ATG;ATG;TTG;NA;ATG;ATG;ATG;ATG	TGA;TAA;TGA;TAG;TGA;TGA;TGA;TGA;TAA;TAA	TGA;TAA;TGA;TAG;TGA;NA;TAA;TGA;TAA;TGA
OUT-0002.Scaffold91.308662-309463	OUT-0002	Formica cinerea	Formicinae	Uncharacterized protein;NA	Spiroplasma	Entoplasmatales	Mollicutes	Scaffold91	308662-309463	Scaffold91:308662-309463	308662	309463	801	90	92	89	2	309215;308662	309215;308659	309340;308793	309340;308793	125;131	125;134	0;0	0;0	A0A433EQ38;NA	100.0;NA	100.0;NA	5.6;NA	5.6;NA	1.6e-12;NA	1.6e-12;NA	ATG;TTT	ATG;TTG	TGA;TAA	TGA;TAA

## Sheet: B.CDS_level_HGAs
locusID	.id	species	subfamily	Protein.names	prokaryote_origin	order_prokaryote_origin	class_prokaryote_origin	locus.scaffold	locus.position	cand.locus	cand.start	cand.end	cand.length	reads_start	reads_end	reads_complete	predicted_protein	CDS	CDS.starts	Reannotated.CDS.starts	CDS.ends	Reannotated.CDS.ends	CDS.lengths	Reannotated.CDS.lengths	CDS.totalcounts	Reannotated.CDS.totalcounts	CDS.UniprotIDs	CDS.cogs	CDS.tigrs	CDS.pids	Reannotated.CDS.pids	CDS.q_covs	Reannotated.q_covs	CDS.s_covs	Reannotated.s_covs	CDS.Eval	Reannotated.Eval	CDS.startCodons	Reannotated.startCodon	CDS.stopCodons	Reannotated.stopCodon	Organism	Gene.ontology.IDs	Gene.ontology..GO.	Gene.ontology..biological.process.	Gene.ontology..molecular.function.	Gene.ontology..cellular.component.	Uniprot_organism	Uniprot_tax_order
GAGA-0020.Scaffold1.5322877-5323044	GAGA-0020	Lasius flavus s2	Formicinae		Wolbachia	Rickettsiales	Alphaproteobacteria	Scaffold1	5322877-5323044	Scaffold1:5322877-5323044	5322877	5323044	167	64	64	64	hypothetical protein	1	5322914	5322914	5323044	5323093	130	179	8	8												ATA	ATG	TAA	TAA
GAGA-0020.Scaffold107.144838-147367	GAGA-0020	Lasius flavus s2	Formicinae	Uncharacterized ANK (Fragment)	Wolbachia	Rickettsiales	Alphaproteobacteria	Scaffold107	144838-147367	Scaffold107:144838-147367	144838	147367	2529	73	75	67	ankyrin_repeat_protein_x000D__x000D_ phosphocholine_transferase_AnkX_x000D__x000D_ Ankyrin homolog	1	144838	144482	147367	147634	2529	3152	7505	12826	A0A1Q3WAM0	COG:COG0666:ANKYR Ankyrin repeat [Category:T%2C Aligned:200-388%2C Eval:1.3e-21%2C score:91.8],COG:COG0666:ANKYR Ankyrin repeat [Category:T%2C Aligned:122-256%2C Eval:1.2e-20%2C score:89.1%2C N-term missing],COG:COG0666:ANKYR Ankyrin repeat [Category:T%2C Aligned:566-739%2C Eval:2.1e-17%2C score:79.5],COG:COG0666:ANKYR Ankyrin repeat [Category:T%2C Aligned:427-597%2C Eval:2.4e-17%2C score:79.5],C…	TIGR:TIGR00870%3B trp: transient-receptor-potential calcium channel protein [Name:TIGR00870%2C Eval:8.9e-117%2C score:389.0%2C bias:56.9],COG:COG0666:ANKYR Ankyrin repeat [Category:T%2C Aligned:200-388%2C Eval:1.3e-21%2C score:91.8],COG:COG0666:ANKYR Ankyrin repeat [Category:T%2C Aligned:122-256%2C Eval:1.2e-20%2C score:89.1%2C N-term missing],COG:COG0666:ANKYR Ankyrin repeat [Category:T%2C Align…	39.6	39.0	99.9	86.0	64.6	69.4	2.6e-153	4.8e-160	CTT	ATG	CTA	TAG	Candidatus Amoebophilus sp. 36-38						Amoebophilaceae	Bacteroidetes
GAGA-0020.Scaffold17.156258-159230	GAGA-0020	Lasius flavus s2	Formicinae	Ankyrin repeat protein	Wolbachia	Rickettsiales	Alphaproteobacteria	Scaffold17	156258-159230	Scaffold17:156258-159230	156258	159230	2972	69	59	56	ankyrin repeat protein	2	156302	156302	158971	158971	2669	2669	1636	1636	E9P653	COG:COG0666:ANKYR Ankyrin repeat [Category:T%2C Aligned:350-551%2C Eval:3.4e-22%2C score:93.7],COG:COG0666:ANKYR Ankyrin repeat [Category:T%2C Aligned:561-761%2C Eval:7.2e-22%2C score:92.6],COG:COG0666:ANKYR Ankyrin repeat [Category:T%2C Aligned:5-200%2C Eval:2.4e-21%2C score:91.0],COG:COG0666:ANKYR Ankyrin repeat [Category:T%2C Aligned:135-340%2C Eval:2.4e-18%2C score:82.6],MGA_1		41.1	41.1	100.0	100.0	89.2	89.2			ATG	ATG	TAA	TAA	Wolbachia endosymbiont wVitB of Nasonia vitripennis phage WOVitB						unclassified Myoviridae	Caudoviricetes
GAGA-0020.Scaffold17.156258-159230	GAGA-0020	Lasius flavus s2	Formicinae	Ankyrin repeat protein	Wolbachia	Rickettsiales	Alphaproteobacteria	Scaffold17	156258-159230	Scaffold17:156258-159230	156258	159230	2972	69	59	56	ankyrin repeat protein	2	159020	159020	159230	159232	210	212	140	140	E9P653			64.4	64.4	100.0	100.0	7.7	7.7	1.5e-18	1.5e-18	ATG	ATG	TGT	TAA	Wolbachia endosymbiont wVitB of Nasonia vitripennis phage WOVitB						unclassified Myoviridae	Caudoviricetes
GAGA-0020.Scaffold267.55721-56766	GAGA-0020	Lasius flavus s2	Formicinae	Ankyrin 3 (Ankyrin repeat family protein)	Wolbachia	Rickettsiales	Alphaproteobacteria	Scaffold267	55721-56766	Scaffold267:55721-56766	55721	56766	1045	42	44	41	ankyrin_repeat_protein_x000D__x000D_ ankyrin_homolog	1	55765	55765	56445	56445	680	680	116	116	Q4EBI3	COG:COG0666:ANKYR Ankyrin repeat [Category:T%2C Aligned:5-199%2C Eval:2.2e-20%2C score:83.3],MGA_1	TIGR:TIGR00870%3B trp: transient-receptor-potential calcium channel protein [Name:TIGR00870%2C Eval:5.9e-22%2C score:75.5%2C bias:3.5],COG:COG0666:ANKYR Ankyrin repeat [Category:T%2C Aligned:5-199%2C Eval:2.2e-20%2C score:83.3],MGA_1	63.6	63.6	98.2	98.2	31.1	31.1	2.0e-69	2.0e-69	ATG	ATG	TAA	TAA	Wolbachia endosymbiont of Drosophila ananassae						Wolbachia	Rickettsiales
GAGA-0020.Scaffold31.542876-547130	GAGA-0020	Lasius flavus s2	Formicinae	Ankyrin repeat protein	Wolbachia	Rickettsiales	Alphaproteobacteria	Scaffold31	542876-547130	Scaffold31:542876-547130	542876	547130	4254	50	30	26	ankyrin repeat protein	1	543027	543027	547130	547139	4103	4112	8836	8851	E9P653	COG:COG0666:ANKYR Ankyrin repeat [Category:T%2C Aligned:35-237%2C Eval:1.0e-21%2C score:93.0],COG:COG0666:ANKYR Ankyrin repeat [Category:T%2C Aligned:253-385%2C Eval:1.3e-18%2C score:83.7%2C N-term missing],COG:COG0666:ANKYR Ankyrin repeat [Category:T%2C Aligned:1019-1158%2C Eval:3.5e-18%2C score:82.6],COG:COG0666:ANKYR Ankyrin repeat [Category:T%2C Aligned:700-842%2C Eval:2.5e-15%2C score:74.1%2…	TIGR:TIGR00870%3B trp: transient-receptor-potential calcium channel protein [Name:TIGR00870%2C Eval:4.5e-91%2C score:304.0%2C bias:46.0],COG:COG0666:ANKYR Ankyrin repeat [Category:T%2C Aligned:35-237%2C Eval:1.0e-21%2C score:93.0],COG:COG0666:ANKYR Ankyrin repeat [Category:T%2C Aligned:253-385%2C Eval:1.3e-18%2C score:83.7%2C N-term missing],COG:COG0666:ANKYR Ankyrin repeat [Category:T%2C Aligned…	42.4	42.4	67.2	67.1	84.6	84.6	1.5e-185	1.5e-185	ATG	ATG	GTG	TAA	Wolbachia endosymbiont wVitB of Nasonia vitripennis phage WOVitB						unclassified Myoviridae	Caudoviricetes
GAGA-0020.Scaffold31.613867-616833	GAGA-0020	Lasius flavus s2	Formicinae	Ankyrin repeat protein	Wolbachia	Rickettsiales	Alphaproteobacteria	Scaffold31	613867-616833	Scaffold31:613867-616833	613867	616833	2966	60	67	49	ankyrin_repeat_protein_x000D__x000D_ phosphocholine_transferase_AnkX	1	613867	613828	616833	617493	2966	3665	457	554	E9P653	COG:COG0666:ANKYR Ankyrin repeat [Category:T%2C Aligned:84-256%2C Eval:1.7e-22%2C score:94.5],COG:COG0666:ANKYR Ankyrin repeat [Category:T%2C Aligned:665-794%2C Eval:1.9e-20%2C score:88.7%2C N-term missing],COG:COG0666:ANKYR Ankyrin repeat [Category:T%2C Aligned:229-404%2C Eval:6.7e-19%2C score:84.1],COG:COG0666:ANKYR Ankyrin repeat [Category:T%2C Aligned:1-164%2C Eval:3.3e-17%2C score:79.1%2C N-…		44.0	43.2	99.9	84.9	91.5	96.4			GAA	ATG	CCT	TAA	Wolbachia endosymbiont wVitB of Nasonia vitripennis phage WOVitB						unclassified Myoviridae	Caudoviricetes
GAGA-0020.Scaffold31.648280-651311	GAGA-0020	Lasius flavus s2	Formicinae	Ankyrin 3 (Ankyrin repeat family protein)	Wolbachia	Rickettsiales	Alphaproteobacteria	Scaffold31	648280-651311	Scaffold31:648280-651311	648280	651311	3031	37	50	29	ankyrin_repeat_protein_x000D__x000D_ phosphocholine_transferase_AnkX	3	649528	649528	650067	650067	539	539	171	171	Q4EBI3	COG:COG0666:ANKYR Ankyrin repeat [Category:T%2C Aligned:2-151%2C Eval:3.2e-21%2C score:84.1%2C N-term missing],MGA_2	TIGR:TIGR00870%3B trp: transient-receptor-potential calcium channel protein [Name:TIGR00870%2C Eval:1.4e-23%2C score:80.8%2C bias:0.4],COG:COG0666:ANKYR Ankyrin repeat [Category:T%2C Aligned:2-151%2C Eval:3.2e-21%2C score:84.1%2C N-term missing],MGA_2	58.0	58.0	77.1	77.1	23.2	23.2	4.7e-36	4.7e-36	ATG	ATG	TAA	TAA	Wolbachia endosymbiont of Drosophila ananassae						Wolbachia	Rickettsiales
GAGA-0020.Scaffold31.648280-651311	GAGA-0020	Lasius flavus s2	Formicinae	Ankyrin repeat protein	Wolbachia	Rickettsiales	Alphaproteobacteria	Scaffold31	648280-651311	Scaffold31:648280-651311	648280	651311	3031	37	50	29	ankyrin_repeat_protein_x000D__x000D_ phosphocholine_transferase_AnkX	3	650259	650259	651311	651317	1052	1058	363	363	E9P653	COG:COG0666:ANKYR Ankyrin repeat [Category:T%2C Aligned:13-142%2C Eval:3.1e-19%2C score:82.6%2C N-term missing],MGA_3	TIGR:TIGR00870%3B trp: transient-receptor-potential calcium channel protein [Name:TIGR00870%2C Eval:5.6e-13%2C score:45.8%2C bias:6.0],COG:COG0666:ANKYR Ankyrin repeat [Category:T%2C Aligned:13-142%2C Eval:3.1e-19%2C score:82.6%2C N-term missing],MGA_3	53.6	53.4	100.0	100.0	38.2	38.3	6.7e-100	3.9e-100	ATG	ATG	GTA	TAA	Wolbachia endosymbiont wVitB of Nasonia vitripennis phage WOVitB						unclassified Myoviridae	Caudoviricetes
GAGA-0020.Scaffold31.648280-651311	GAGA-0020	Lasius flavus s2	Formicinae	Ankyrin repeat protein	Wolbachia	Rickettsiales	Alphaproteobacteria	Scaffold31	648280-651311	Scaffold31:648280-651311	648280	651311	3031	37	50	29	ankyrin_repeat_protein_x000D__x000D_ phosphocholine_transferase_AnkX	3	648324	648324	649610	649610	1286	1286	1313	1313	E9P653	COG:COG0666:ANKYR Ankyrin repeat [Category:T%2C Aligned:67-269%2C Eval:3.3e-24%2C score:97.6],COG:COG0666:ANKYR Ankyrin repeat [Category:T%2C Aligned:238-409%2C Eval:4.2e-20%2C score:86.0],MGA_1	TIGR:TIGR00870%3B trp: transient-receptor-potential calcium channel protein [Name:TIGR00870%2C Eval:4.9e-52%2C score:174.9%2C bias:13.5],COG:COG0666:ANKYR Ankyrin repeat [Category:T%2C Aligned:67-269%2C Eval:3.3e-24%2C score:97.6],COG:COG0666:ANKYR Ankyrin repeat [Category:T%2C Aligned:238-409%2C Eval:4.2e-20%2C score:86.0],MGA_1	51.2	51.2	98.1	98.1	44.7	44.7	5.6e-110	5.6e-110	ATG	ATG	TGA	TGA	Wolbachia endosymbiont wVitB of Nasonia vitripennis phage WOVitB						unclassified Myoviridae	Caudoviricetes
GAGA-0020.Scaffold31.704726-708354	GAGA-0020	Lasius flavus s2	Formicinae	Ankyrin repeat protein	Wolbachia	Rickettsiales	Alphaproteobacteria	Scaffold31	704726-708354	Scaffold31:704726-708354	704726	708354	3628	49	55	46	ankyrin repeat protein	1	704770	704770	708354	708360	3584	3590	8046	8047	E9P653	COG:COG0666:ANKYR Ankyrin repeat [Category:T%2C Aligned:50-251%2C Eval:5.3e-23%2C score:96.4],COG:COG0666:ANKYR Ankyrin repeat [Category:T%2C Aligned:670-841%2C Eval:1.7e-20%2C score:89.1],COG:COG0666:ANKYR Ankyrin repeat [Category:T%2C Aligned:780-981%2C Eval:2.8e-19%2C score:85.6],COG:COG0666:ANKYR Ankyrin repeat [Category:T%2C Aligned:566-701%2C Eval:2.9e-19%2C score:85.6%2C N-term missing],CO…	TIGR:TIGR00870%3B trp: transient-receptor-potential calcium channel protein [Name:TIGR00870%2C Eval:3.4e-106%2C score:354.0%2C bias:44.5],COG:COG0666:ANKYR Ankyrin repeat [Category:T%2C Aligned:50-251%2C Eval:5.3e-23%2C score:96.4],COG:COG0666:ANKYR Ankyrin repeat [Category:T%2C Aligned:670-841%2C Eval:1.7e-20%2C score:89.1],COG:COG0666:ANKYR Ankyrin repeat [Category:T%2C Aligned:780-981%2C Eval:…	55.5	55.5	65.9	65.8	77.4	77.4	8.3e-233	8.3e-233	ATG	ATG	GTA	TAA	Wolbachia endosymbiont wVitB of Nasonia vitripennis phage WOVitB						unclassified Myoviridae	Caudoviricetes
GAGA-0020.Scaffold38.658653-660450	GAGA-0020	Lasius flavus s2	Formicinae	Ankyrin repeat protein	Wolbachia	Rickettsiales	Alphaproteobacteria	Scaffold38	658653-660450	Scaffold38:658653-660450	658653	660450	1797	43	34	32	ankyrin repeat protein	1	658959	658959	660450	660467	1491	1508	17046	17096	E9P653	COG:COG0666:ANKYR Ankyrin repeat [Category:T%2C Aligned:78-216%2C Eval:5.4e-19%2C score:83.3%2C N-term missing],COG:COG0666:ANKYR Ankyrin repeat [Category:T%2C Aligned:1-140%2C Eval:9.7e-19%2C score:82.6%2C N-term missing],COG:COG0666:ANKYR Ankyrin repeat [Category:T%2C Aligned:154-285%2C Eval:2.3e-18%2C score:81.4%2C N-term missing],MGA_1	TIGR:TIGR00870%3B trp: transient-receptor-potential calcium channel protein [Name:TIGR00870%2C Eval:4.0e-40%2C score:135.5%2C bias:4.2],COG:COG0666:ANKYR Ankyrin repeat [Category:T%2C Aligned:78-216%2C Eval:5.4e-19%2C score:83.3%2C N-term missing],COG:COG0666:ANKYR Ankyrin repeat [Category:T%2C Aligned:1-140%2C Eval:9.7e-19%2C score:82.6%2C N-term missing],COG:COG0666:ANKYR Ankyrin repeat [Catego…	42.7	42.6	100.0	97.2	52.6	51.7	6.7e-97	2.4e-94	ATG	ATG	ATG	TAA	Wolbachia endosymbiont wVitB of Nasonia vitripennis phage WOVitB						unclassified Myoviridae	Caudoviricetes
GAGA-0020.Scaffold42.25702-28653	GAGA-0020	Lasius flavus s2	Formicinae	Ankyrin repeat protein	Wolbachia	Rickettsiales	Alphaproteobacteria	Scaffold42	25702-28653	Scaffold42:25702-28653	25702	28653	2951	75	71	59	ankyrin repeat protein	1	25702	25684	28608	28608	2906	2924	3716	3806	E9P653	COG:COG0666:ANKYR Ankyrin repeat [Category:T%2C Aligned:6-203%2C Eval:3.3e-22%2C score:93.7],COG:COG0666:ANKYR Ankyrin repeat [Category:T%2C Aligned:452-623%2C Eval:2.6e-21%2C score:91.0],COG:COG0666:ANKYR Ankyrin repeat [Category:T%2C Aligned:172-343%2C Eval:3.1e-20%2C score:88.0],COG:COG0666:ANKYR Ankyrin repeat [Category:T%2C Aligned:592-767%2C Eval:8.7e-19%2C score:83.7],COG:COG0666:ANKYR Ank…		45.4	45.4	99.4	99.4	97.7	98.2			ATG	ATG	ATT	TAA	Wolbachia endosymbiont wVitB of Nasonia vitripennis phage WOVitB						unclassified Myoviridae	Caudoviricetes
GAGA-0020.Scaffold43.15725-21639	GAGA-0020	Lasius flavus s2	Formicinae	Ankyrin repeat protein	Wolbachia	Rickettsiales	Alphaproteobacteria	Scaffold43	15725-21639	Scaffold43:15725-21639	15725	21639	5914	92	92	62	ankyrin repeat protein	1	15725	15718	21594	21594	5869	5876	12398	12457	E9P653	COG:COG0666:ANKYR Ankyrin repeat [Category:T%2C Aligned:1585-1723%2C Eval:1.1e-19%2C score:87.6%2C N-term missing],COG:COG0666:ANKYR Ankyrin repeat [Category:T%2C Aligned:186-398%2C Eval:1.8e-19%2C score:86.8],COG:COG0666:ANKYR Ankyrin repeat [Category:T%2C Aligned:6-246%2C Eval:1.6e-17%2C score:81.0],COG:COG0666:ANKYR Ankyrin repeat [Category:T%2C Aligned:391-521%2C Eval:1.8e-17%2C score:81.0%2C…	TIGR:TIGR00870%3B trp: transient-receptor-potential calcium channel protein [Name:TIGR00870%2C Eval:1.1e-113%2C score:378.8%2C bias:61.7],COG:COG0666:ANKYR Ankyrin repeat [Category:T%2C Aligned:1585-1723%2C Eval:1.1e-19%2C score:87.6%2C N-term missing],COG:COG0666:ANKYR Ankyrin repeat [Category:T%2C Aligned:186-398%2C Eval:1.8e-19%2C score:86.8],COG:COG0666:ANKYR Ankyrin repeat [Category:T%2C Ali…	53.7	53.7	45.6	45.7	95.3	95.6	1.3e-257	2.6e-258	ATG	ATG	GGT	TAA	Wolbachia endosymbiont wVitB of Nasonia vitripennis phage WOVitB						unclassified Myoviridae	Caudoviricetes
GAGA-0024.Scaffold1.16539177-16545088	GAGA-0024	Lasius flavus s1	Formicinae	Ankyrin repeat protein	Wolbachia	Rickettsiales	Alphaproteobacteria	Scaffold1	16539177-16545088	Scaffold1:16539177-16545088	16539177	16545088	5911	17	15	8	ankyrin repeat protein	1	16539177	16539170	16545043	16545043	5866	5873	8162	8177	E9P653	COG:COG0666:ANKYR Ankyrin repeat [Category:T%2C Aligned:1585-1723%2C Eval:1.1e-19%2C score:87.6%2C N-term missing],COG:COG0666:ANKYR Ankyrin repeat [Category:T%2C Aligned:186-398%2C Eval:1.8e-19%2C score:86.8],COG:COG0666:ANKYR Ankyrin repeat [Category:T%2C Aligned:6-246%2C Eval:1.6e-17%2C score:81.0],COG:COG0666:ANKYR Ankyrin repeat [Category:T%2C Aligned:391-521%2C Eval:1.8e-17%2C score:81.0%2C…	TIGR:TIGR00870%3B trp: transient-receptor-potential calcium channel protein [Name:TIGR00870%2C Eval:4.1e-114%2C score:380.2%2C bias:62.5],COG:COG0666:ANKYR Ankyrin repeat [Category:T%2C Aligned:1585-1723%2C Eval:1.1e-19%2C score:87.6%2C N-term missing],COG:COG0666:ANKYR Ankyrin repeat [Category:T%2C Aligned:186-398%2C Eval:1.8e-19%2C score:86.8],COG:COG0666:ANKYR Ankyrin repeat [Category:T%2C Ali…	53.8	53.8	45.6	45.6	95.3	95.6	2.0e-258	3.9e-259	ATG	ATG	GGT	TAA	Wolbachia endosymbiont wVitB of Nasonia vitripennis phage WOVitB						unclassified Myoviridae	Caudoviricetes
GAGA-0024.Scaffold4.14751348-14751515	GAGA-0024	Lasius flavus s1	Formicinae		Wolbachia	Rickettsiales	Alphaproteobacteria	Scaffold4	14751348-14751515	Scaffold4:14751348-14751515	14751348	14751515	167	29	29	29	hypothetical protein	1	14751348	14751295	14751477	14751477	129	182	0	0												TAA	ATG	TAA	TAA
GAGA-0024.Scaffold5.1578789-1581254	GAGA-0024	Lasius flavus s1	Formicinae	Ankyrin repeat protein	Wolbachia	Rickettsiales	Alphaproteobacteria	Scaffold5	1578789-1581254	Scaffold5:1578789-1581254	1578789	1581254	2465	29	41	25	ankyrin repeat protein RBE_0220	1	1578789	1578786	1581254	1581707	2465	2921	362	454	E9P653	COG:COG0666:ANKYR Ankyrin repeat [Category:T%2C Aligned:199-400%2C Eval:1.1e-22%2C score:94.9],COG:COG0666:ANKYR Ankyrin repeat [Category:T%2C Aligned:410-610%2C Eval:1.9e-22%2C score:94.1],COG:COG0666:ANKYR Ankyrin repeat [Category:T%2C Aligned:18-189%2C Eval:1.4e-19%2C score:85.6],MGA_1		45.0	43.1	100.0	100.0	86.0	98.7			GAA	ATG	TTG	TAA	Wolbachia endosymbiont wVitB of Nasonia vitripennis phage WOVitB						unclassified Myoviridae	Caudoviricetes
GAGA-0024.Scaffold5.2223940-2227970	GAGA-0024	Lasius flavus s1	Formicinae	Ankyrin repeat protein	Wolbachia	Rickettsiales	Alphaproteobacteria	Scaffold5	2223940-2227970	Scaffold5:2223940-2227970	2223940	2227970	4030	24	34	19	ankyrin_repeat_protein_x000D__x000D_ phosphocholine_transferase_AnkX	1	2223940	2223933	2227970	2228318	4030	4385	1494	1688	E9P653	COG:COG0666:ANKYR Ankyrin repeat [Category:T%2C Aligned:683-852%2C Eval:1.2e-21%2C score:92.6],COG:COG0666:ANKYR Ankyrin repeat [Category:T%2C Aligned:823-994%2C Eval:3.2e-21%2C score:91.4],COG:COG0666:ANKYR Ankyrin repeat [Category:T%2C Aligned:19-224%2C Eval:4.1e-21%2C score:91.0],COG:COG0666:ANKYR Ankyrin repeat [Category:T%2C Aligned:268-434%2C Eval:1.0e-20%2C score:89.9],COG:COG0666:ANKYR An…	TIGR:TIGR00870%3B trp: transient-receptor-potential calcium channel protein [Name:TIGR00870%2C Eval:2.3e-157%2C score:523.1%2C bias:60.2],COG:COG0666:ANKYR Ankyrin repeat [Category:T%2C Aligned:683-852%2C Eval:1.2e-21%2C score:92.6],COG:COG0666:ANKYR Ankyrin repeat [Category:T%2C Aligned:823-994%2C Eval:3.2e-21%2C score:91.4],COG:COG0666:ANKYR Ankyrin repeat [Category:T%2C Aligned:19-224%2C Eval:…	44.9	44.9	74.9	69.0	97.8	98.0	2.9e-221	6.3e-222	ATG	ATG	GGT	TAA	Wolbachia endosymbiont wVitB of Nasonia vitripennis phage WOVitB						unclassified Myoviridae	Caudoviricetes
GAGA-0024.Scaffold5.3223505-3225315	GAGA-0024	Lasius flavus s1	Formicinae	Ankyrin repeats family protein	Wolbachia	Rickettsiales	Alphaproteobacteria	Scaffold5	3223505-3225315	Scaffold5:3223505-3225315	3223505	3225315	1810	46	47	36	ankyrin repeat protein	2	3223505	3223487	3223960	3223960	455	473	476	494	A0A5B9JVP8			65.8	65.0	100.0	100.0	44.4	45.8	1.7e-49	8.9e-51	ATG	ATG	ATT	TAA	Wolbachia endosymbiont of Drosophila ananassae						Wolbachia	Rickettsiales
GAGA-0024.Scaffold5.3223505-3225315	GAGA-0024	Lasius flavus s1	Formicinae	Uncharacterized ANK (Fragment)	Wolbachia	Rickettsiales	Alphaproteobacteria	Scaffold5	3223505-3225315	Scaffold5:3223505-3225315	3223505	3225315	1810	46	47	36	ankyrin repeat protein	2	3223957	3223957	3225315	3226197	1358	2240	491	862	A0A1Q3W6E5	COG:COG0666:ANKYR Ankyrin repeat [Category:T%2C Aligned:14-189%2C Eval:9.9e-23%2C score:93.7],COG:COG0666:ANKYR Ankyrin repeat [Category:T%2C Aligned:129-377%2C Eval:2.9e-22%2C score:92.2],MGA_2	TIGR:TIGR00870%3B trp: transient-receptor-potential calcium channel protein [Name:TIGR00870%2C Eval:3.6e-55%2C score:185.3%2C bias:30.7],COG:COG0666:ANKYR Ankyrin repeat [Category:T%2C Aligned:14-189%2C Eval:9.9e-23%2C score:93.7],COG:COG0666:ANKYR Ankyrin repeat [Category:T%2C Aligned:129-377%2C Eval:2.9e-22%2C score:92.2],MGA_2	44.4	28.1	92.5	93.8	51.6	77.5	2.8e-78		GAA	ATG	TGA	TGA	Candidatus Amoebophilus sp. 36-38						Amoebophilaceae	Bacteroidetes
GAGA-0024.Scaffold6.5256001-5259552	GAGA-0024	Lasius flavus s1	Formicinae	Ankyrin repeat protein	Wolbachia	Rickettsiales	Alphaproteobacteria	Scaffold6	5256001-5259552	Scaffold6:5256001-5259552	5256001	5259552	3551	26	23	10	ankyrin repeat protein	1	5256001	5255732	5259400	5259400	3399	3668	2351	2952	E9P653	COG:COG0666:ANKYR Ankyrin repeat [Category:T%2C Aligned:35-237%2C Eval:1.2e-20%2C score:89.5],COG:COG0666:ANKYR Ankyrin repeat [Category:T%2C Aligned:871-1010%2C Eval:5.1e-18%2C score:81.8],COG:COG0666:ANKYR Ankyrin repeat [Category:T%2C Aligned:552-694%2C Eval:1.0e-15%2C score:74.9%2C N-term missing],COG:COG0666:ANKYR Ankyrin repeat [Category:T%2C Aligned:206-387%2C Eval:4.9e-15%2C score:72.9],C…		47.3	47.1	76.1	70.5	80.0	80.0		3.2e-203	ATG	ATG	TAG	TAA	Wolbachia endosymbiont wVitB of Nasonia vitripennis phage WOVitB						unclassified Myoviridae	Caudoviricetes
GAGA-0024.Scaffold6.5397922-5400444	GAGA-0024	Lasius flavus s1	Formicinae	Ankyrin repeat protein	Wolbachia	Rickettsiales	Alphaproteobacteria	Scaffold6	5397922-5400444	Scaffold6:5397922-5400444	5397922	5400444	2522	41	47	34	ankyrin repeat protein	1	5397922	5397883	5400399	5400399	2477	2516	481	482	E9P653	COG:COG0666:ANKYR Ankyrin repeat [Category:T%2C Aligned:419-629%2C Eval:1.4e-20%2C score:88.7],COG:COG0666:ANKYR Ankyrin repeat [Category:T%2C Aligned:58-243%2C Eval:7.7e-20%2C score:86.8],COG:COG0666:ANKYR Ankyrin repeat [Category:T%2C Aligned:242-472%2C Eval:7.9e-09%2C score:54.1],MGA_1	TIGR:TIGR00870%3B trp: transient-receptor-potential calcium channel protein [Name:TIGR00870%2C Eval:1.3e-45%2C score:153.7%2C bias:17.0],COG:COG0666:ANKYR Ankyrin repeat [Category:T%2C Aligned:419-629%2C Eval:1.4e-20%2C score:88.7],COG:COG0666:ANKYR Ankyrin repeat [Category:T%2C Aligned:58-243%2C Eval:7.7e-20%2C score:86.8],COG:COG0666:ANKYR Ankyrin repeat [Category:T%2C Aligned:242-472%2C Eval:7…	54.2	54.2	77.0	75.9	66.8	66.8	4.1e-188	4.2e-188	ATG	ATG	CCT	TAA	Wolbachia endosymbiont wVitB of Nasonia vitripennis phage WOVitB						unclassified Myoviridae	Caudoviricetes
GAGA-0024.Scaffold7.6739609-6740694	GAGA-0024	Lasius flavus s1	Formicinae	Ankyrin 3 (Ankyrin repeat family protein)	Wolbachia	Rickettsiales	Alphaproteobacteria	Scaffold7	6739609-6740694	Scaffold7:6739609-6740694	6739609	6740694	1085	33	31	26	ankyrin repeat protein	1	6739609	6738938	6740694	6741049	1085	2111	5124	8765	Q4EBI3	COG:COG0666:ANKYR Ankyrin repeat [Category:T%2C Aligned:14-186%2C Eval:2.6e-22%2C score:91.4],COG:COG0666:ANKYR Ankyrin repeat [Category:T%2C Aligned:154-321%2C Eval:8.2e-19%2C score:81.8],MGA_1		33.9	45.9	92.8	83.5	96.9	82.0			ATT	ATG	TAA	TAG	Wolbachia endosymbiont of Drosophila ananassae						Wolbachia	Rickettsiales
GAGA-0025.Scaffold15.4178206-4178515	GAGA-0025	Megaponera analis	Ponerinae		Spiroplasma_kunkelii	Entoplasmatales	Mollicutes	Scaffold15	4178206-4178515	Scaffold15:4178206-4178515	4178206	4178515	309	39	46	37	hypothetical protein	0
GAGA-0025.Scaffold15.4180270-4181120	GAGA-0025	Megaponera analis	Ponerinae		Spiroplasma_kunkelii	Entoplasmatales	Mollicutes	Scaffold15	4180270-4181120	Scaffold15:4180270-4181120	4180270	4181120	850	35	36	35	hypothetical protein	2	4180587	4180587	4180733	4180733	146	146	12	12												TTG	TTG	TAA	TAA
GAGA-0025.Scaffold15.4180270-4181120	GAGA-0025	Megaponera analis	Ponerinae		Spiroplasma_kunkelii	Entoplasmatales	Mollicutes	Scaffold15	4180270-4181120	Scaffold15:4180270-4181120	4180270	4181120	850	35	36	35	hypothetical protein	2	4181039	4180587	4181120	4180733	81	146	14	12												ATG	TTG	CAT	TAA
GAGA-0028.Scaffold119.58501-58755	GAGA-0028	Myrmica rubra	Myrmicinae	Ankyrin 3 (Ankyrin repeat family protein)	Wolbachia	Rickettsiales	Alphaproteobacteria	Scaffold119	58501-58755	Scaffold119:58501-58755	58501	58755	254	22	22	22	ankyrin repeat protein	1	58501	57502	58755	58759	254	1257	2	66	Q4EBI3			79.1	58.2	100.0	91.9	13.9	40.9	8.0e-28	4.6e-117	ATA	ATG	AGA	AAG	Wolbachia endosymbiont of Drosophila ananassae						Wolbachia	Rickettsiales
GAGA-0028.Scaffold148.371628-371851	GAGA-0028	Myrmica rubra	Myrmicinae	Periplasmic serine endoprotease DegP-like (EC 3.4.21.107)	Wolbachia	Rickettsiales	Alphaproteobacteria	Scaffold148	371628-371851	Scaffold148:371628-371851	371628	371851	223	20	17	15	periplasmic_serine_endoprotease_DegP-like	1	371628	371595	371851	371885	223	290	0	0	A0A218KP59	COG:COG0265:DegQ Periplasmic serine protease%2C S1-C subfamily%2C contain C-terminal PDZ domain [Category:O%2C Aligned:12-74%2C Eval:2.0e-11%2C score:54.5%2C N-term missing],MGA_1	TIGR:TIGR02037%3B degP_htrA_DO: peptidase Do [Name:TIGR02037%2C Eval:7.2e-21%2C score:72.6%2C bias:0.0],COG:COG0265:DegQ Periplasmic serine protease%2C S1-C subfamily%2C contain C-terminal PDZ domain [Category:O%2C Aligned:12-74%2C Eval:2.0e-11%2C score:54.5%2C N-term missing],MGA_1	91.9	91.9	100.0	77.1	14.9	14.9	2.5e-29	2.5e-29	GTT	GTG	TAT	TGA	Wolbachia endosymbiont of Folsomia candida	GO:0004252; GO:0042597	periplasmic space [GO:0042597]; serine-type endopeptidase activity [GO:0004252]		serine-type endopeptidase activity [GO:0004252]	periplasmic space [GO:0042597]	Wolbachia	Rickettsiales
GAGA-0028.Scaffold15.3417776-3420446	GAGA-0028	Myrmica rubra	Myrmicinae	Ankyrin repeat protein	Wolbachia	Rickettsiales	Alphaproteobacteria	Scaffold15	3417776-3420446	Scaffold15:3417776-3420446	3417776	3420446	2670	36	33	33	ankyrin repeat protein	1	3417776	3417763	3420446	3420435	2670	2672	88	88	E9P653	COG:COG0666:ANKYR Ankyrin repeat [Category:T%2C Aligned:489-697%2C Eval:3.8e-21%2C score:90.7],COG:COG0666:ANKYR Ankyrin repeat [Category:T%2C Aligned:40-242%2C Eval:1.3e-19%2C score:86.0],COG:COG0666:ANKYR Ankyrin repeat [Category:T%2C Aligned:404-553%2C Eval:8.4e-12%2C score:63.3%2C N-term missing],COG:COG0666:ANKYR Ankyrin repeat [Category:T%2C Aligned:202-398%2C Eval:9.6e-10%2C score:57.1%2C …		58.5	58.4	95.7	95.7	85.5	85.6			TGT	ATG	AGA	TGA	Wolbachia endosymbiont wVitB of Nasonia vitripennis phage WOVitB						unclassified Myoviridae	Caudoviricetes
GAGA-0028.Scaffold15.3637537-3642723	GAGA-0028	Myrmica rubra	Myrmicinae		Wolbachia	Rickettsiales	Alphaproteobacteria	Scaffold15	3637537-3642723	Scaffold15:3637537-3642723	3637537	3642723	5186	26	24	17	ankyrin repeat protein	4	3638603	3638603	3638830	3638830	227	227	48	48												ATG	ATG	TGA	TGA
GAGA-0028.Scaffold15.3637537-3642723	GAGA-0028	Myrmica rubra	Myrmicinae		Wolbachia	Rickettsiales	Alphaproteobacteria	Scaffold15	3637537-3642723	Scaffold15:3637537-3642723	3637537	3642723	5186	26	24	17	ankyrin repeat protein	4	3638757	3638757	3638984	3638984	227	227	16	16												ATG	ATG	TAA	TAA
GAGA-0028.Scaffold15.3637537-3642723	GAGA-0028	Myrmica rubra	Myrmicinae	Ankyrin repeat protein	Wolbachia	Rickettsiales	Alphaproteobacteria	Scaffold15	3637537-3642723	Scaffold15:3637537-3642723	3637537	3642723	5186	26	24	17	ankyrin repeat protein	4	3639971	3639971	3642723	3642727	2752	2756	860	860	E9P653	COG:COG0666:ANKYR Ankyrin repeat [Category:T%2C Aligned:529-702%2C Eval:4.2e-20%2C score:87.6],COG:COG0666:ANKYR Ankyrin repeat [Category:T%2C Aligned:43-236%2C Eval:1.0e-18%2C score:83.3],COG:COG0666:ANKYR Ankyrin repeat [Category:T%2C Aligned:398-543%2C Eval:5.2e-13%2C score:66.8%2C N-term missing],COG:COG0666:ANKYR Ankyrin repeat [Category:T%2C Aligned:164-392%2C Eval:3.4e-09%2C score:55.6],MG…		54.4	54.4	96.2	96.0	85.6	85.6			ATA	ATG	TGA	TGA	Wolbachia endosymbiont wVitB of Nasonia vitripennis phage WOVitB						unclassified Myoviridae	Caudoviricetes
GAGA-0028.Scaffold15.3637537-3642723	GAGA-0028	Myrmica rubra	Myrmicinae	Ankyrin repeats family protein	Wolbachia	Rickettsiales	Alphaproteobacteria	Scaffold15	3637537-3642723	Scaffold15:3637537-3642723	3637537	3642723	5186	26	24	17	ankyrin repeat protein	4	3637537	3636538	3638309	3638309	772	1771	133	151	A0A5B9JVP8	COG:COG0666:ANKYR Ankyrin repeat [Category:T%2C Aligned:1-82%2C Eval:3.2e-08%2C score:49.8%2C N-term missing],MGA_1		64.8	47.0	98.4	99.2	73.1	67.4	2.1e-82	2.9e-142	CAG	ATG	TGA	TGA	Wolbachia endosymbiont of Drosophila ananassae						Wolbachia	Rickettsiales
GAGA-0028.Scaffold17.137169-139671	GAGA-0028	Myrmica rubra	Myrmicinae	Ankyrin repeat protein	Wolbachia	Rickettsiales	Alphaproteobacteria	Scaffold17	137169-139671	Scaffold17:137169-139671	137169	139671	2502	16	21	15	ankyrin repeat protein	1	137169	137156	139671	139675	2502	2519	3199	3200	E9P653	COG:COG0666:ANKYR Ankyrin repeat [Category:T%2C Aligned:36-236%2C Eval:2.7e-19%2C score:84.9],COG:COG0666:ANKYR Ankyrin repeat [Category:T%2C Aligned:509-637%2C Eval:2.8e-17%2C score:79.1%2C N-term missing],COG:COG0666:ANKYR Ankyrin repeat [Category:T%2C Aligned:339-543%2C Eval:2.2e-13%2C score:67.5],COG:COG0666:ANKYR Ankyrin repeat [Category:T%2C Aligned:196-366%2C Eval:2.2e-11%2C score:61.8%2C …		59.6	59.5	98.7	98.1	87.8	87.9			ATA	ATG	AGA	TGA	Wolbachia endosymbiont wVitB of Nasonia vitripennis phage WOVitB						unclassified Myoviridae	Caudoviricetes
GAGA-0028.Scaffold17.1745282-1749632	GAGA-0028	Myrmica rubra	Myrmicinae	Ankyrin repeat protein	Wolbachia	Rickettsiales	Alphaproteobacteria	Scaffold17	1745282-1749632	Scaffold17:1745282-1749632	1745282	1749632	4350	34	34	17	ankyrin repeat protein	2	1745282	1745269	1746609	1746609	1327	1340	46	46	E9P653	COG:COG0666:ANKYR Ankyrin repeat [Category:T%2C Aligned:76-270%2C Eval:1.1e-21%2C score:90.7],COG:COG0666:ANKYR Ankyrin repeat [Category:T%2C Aligned:8-141%2C Eval:8.4e-16%2C score:73.7%2C N-term missing],MGA_1	TIGR:TIGR00870%3B trp: transient-receptor-potential calcium channel protein [Name:TIGR00870%2C Eval:1.4e-21%2C score:74.2%2C bias:12.1],COG:COG0666:ANKYR Ankyrin repeat [Category:T%2C Aligned:76-270%2C Eval:1.1e-21%2C score:90.7],COG:COG0666:ANKYR Ankyrin repeat [Category:T%2C Aligned:8-141%2C Eval:8.4e-16%2C score:73.7%2C N-term missing],MGA_1	49.2	49.1	98.2	97.5	47.0	47.1	1.5e-100	8.6e-101	TTG	TTG	AGA	TGA	Wolbachia endosymbiont wVitB of Nasonia vitripennis phage WOVitB						unclassified Myoviridae	Caudoviricetes
GAGA-0028.Scaffold17.1745282-1749632	GAGA-0028	Myrmica rubra	Myrmicinae	Ankyrin repeat protein	Wolbachia	Rickettsiales	Alphaproteobacteria	Scaffold17	1745282-1749632	Scaffold17:1745282-1749632	1745282	1749632	4350	34	34	17	ankyrin repeat protein	2	1747108	1747108	1749632	1749636	2524	2528	9	9	E9P653	COG:COG0666:ANKYR Ankyrin repeat [Category:T%2C Aligned:543-730%2C Eval:2.2e-23%2C score:96.8],COG:COG0666:ANKYR Ankyrin repeat [Category:T%2C Aligned:51-236%2C Eval:7.5e-19%2C score:83.7],COG:COG0666:ANKYR Ankyrin repeat [Category:T%2C Aligned:659-840%2C Eval:2.4e-18%2C score:82.2],COG:COG0666:ANKYR Ankyrin repeat [Category:T%2C Aligned:473-599%2C Eval:2.2e-13%2C score:67.5%2C N-term missing],CO…		24.8	24.8	91.5	91.3	85.5	85.5			ATA	ATG	TGA	TGA	Wolbachia endosymbiont wVitB of Nasonia vitripennis phage WOVitB						unclassified Myoviridae	Caudoviricetes
GAGA-0028.Scaffold17.1837826-1842490	GAGA-0028	Myrmica rubra	Myrmicinae	Ankyrin repeat protein	Wolbachia	Rickettsiales	Alphaproteobacteria	Scaffold17	1837826-1842490	Scaffold17:1837826-1842490	1837826	1842490	4664	16	12	11	ankyrin repeat protein	2	1842281	1842281	1842490	1842502	209	221	36	37	E9P653			72.9	72.9	100.0	95.9	7.4	7.4	4.6e-23	4.6e-23	TTG	TTG	GAA	TGA	Wolbachia endosymbiont wVitB of Nasonia vitripennis phage WOVitB						unclassified Myoviridae	Caudoviricetes
GAGA-0028.Scaffold17.1837826-1842490	GAGA-0028	Myrmica rubra	Myrmicinae	Ankyrin repeat protein	Wolbachia	Rickettsiales	Alphaproteobacteria	Scaffold17	1837826-1842490	Scaffold17:1837826-1842490	1837826	1842490	4664	16	12	11	ankyrin repeat protein	2	1837826	1837821	1842236	1842236	4410	4415	110	110	E9P653	COG:COG0666:ANKYR Ankyrin repeat [Category:T%2C Aligned:1161-1378%2C Eval:1.9e-23%2C score:98.0],COG:COG0666:ANKYR Ankyrin repeat [Category:T%2C Aligned:543-730%2C Eval:1.8e-22%2C score:95.3],COG:COG0666:ANKYR Ankyrin repeat [Category:T%2C Aligned:852-1039%2C Eval:2.0e-22%2C score:94.9],COG:COG0666:ANKYR Ankyrin repeat [Category:T%2C Aligned:659-849%2C Eval:7.8e-19%2C score:84.5],COG:COG0666:ANKY…	TIGR:TIGR00870%3B trp: transient-receptor-potential calcium channel protein [Name:TIGR00870%2C Eval:7.2e-93%2C score:309.9%2C bias:71.0],COG:COG0666:ANKYR Ankyrin repeat [Category:T%2C Aligned:1161-1378%2C Eval:1.9e-23%2C score:98.0],COG:COG0666:ANKYR Ankyrin repeat [Category:T%2C Aligned:543-730%2C Eval:1.8e-22%2C score:95.3],COG:COG0666:ANKYR Ankyrin repeat [Category:T%2C Aligned:852-1039%2C Ev…	60.1	60.1	43.4	43.4	68.1	68.1	9.8e-207	9.8e-207	TAC	ATG	TAA	TAA	Wolbachia endosymbiont wVitB of Nasonia vitripennis phage WOVitB						unclassified Myoviridae	Caudoviricetes
GAGA-0028.Scaffold17.3507602-3510478	GAGA-0028	Myrmica rubra	Myrmicinae	Ankyrin repeat protein	Wolbachia	Rickettsiales	Alphaproteobacteria	Scaffold17	3507602-3510478	Scaffold17:3507602-3510478	3507602	3510478	2876	25	23	18	ankyrin repeat protein RBE_0921	1	3507602	3507564	3510478	3510482	2876	2918	761	773	E9P653	COG:COG0666:ANKYR Ankyrin repeat [Category:T%2C Aligned:46-234%2C Eval:1.8e-19%2C score:85.6],COG:COG0666:ANKYR Ankyrin repeat [Category:T%2C Aligned:548-710%2C Eval:1.2e-17%2C score:80.3],COG:COG0666:ANKYR Ankyrin repeat [Category:T%2C Aligned:409-619%2C Eval:1.4e-14%2C score:71.4],COG:COG0666:ANKYR Ankyrin repeat [Category:T%2C Aligned:221-438%2C Eval:7.3e-10%2C score:57.5],MGA_1		69.4	69.2	100.0	99.0	98.1	98.5			ATA	ATG	TAG	TAG	Wolbachia endosymbiont wVitB of Nasonia vitripennis phage WOVitB						unclassified Myoviridae	Caudoviricetes
GAGA-0028.Scaffold17.79380-82378	GAGA-0028	Myrmica rubra	Myrmicinae	Ankyrin repeat protein	Wolbachia	Rickettsiales	Alphaproteobacteria	Scaffold17	79380-82378	Scaffold17:79380-82378	79380	82378	2998	22	27	19	ankyrin repeat protein	5	81965	81965	82378	82399	413	434	6	6	E9P653	COG:COG0666:ANKYR Ankyrin repeat [Category:T%2C Aligned:46-138%2C Eval:5.7e-12%2C score:57.9%2C C-term missing],MGA_5	TIGR:TIGR00870%3B trp: transient-receptor-potential calcium channel protein [Name:TIGR00870%2C Eval:1.7e-13%2C score:47.4%2C bias:0.5],COG:COG0666:ANKYR Ankyrin repeat [Category:T%2C Aligned:46-138%2C Eval:5.7e-12%2C score:57.9%2C C-term missing],MGA_5	77.1	77.1	100.0	95.8	14.8	14.8	4.7e-52	4.7e-52	TTG	TTG	GAA	TGA	Wolbachia endosymbiont wVitB of Nasonia vitripennis phage WOVitB						unclassified Myoviridae	Caudoviricetes
GAGA-0028.Scaffold17.79380-82378	GAGA-0028	Myrmica rubra	Myrmicinae		Wolbachia	Rickettsiales	Alphaproteobacteria	Scaffold17	79380-82378	Scaffold17:79380-82378	79380	82378	2998	22	27	19	ankyrin repeat protein	5	81310	81310	81573	81573	263	263	21	21												ATG	ATG	TAG	TAG
GAGA-0028.Scaffold17.79380-82378	GAGA-0028	Myrmica rubra	Myrmicinae		Wolbachia	Rickettsiales	Alphaproteobacteria	Scaffold17	79380-82378	Scaffold17:79380-82378	79380	82378	2998	22	27	19	ankyrin repeat protein	5	81589	81589	81837	81837	248	248	23	23												ATG	ATG	TGA	TGA
GAGA-0028.Scaffold17.79380-82378	GAGA-0028	Myrmica rubra	Myrmicinae	Ankyrin 3 (Ankyrin repeat family protein)	Wolbachia	Rickettsiales	Alphaproteobacteria	Scaffold17	79380-82378	Scaffold17:79380-82378	79380	82378	2998	22	27	19	ankyrin repeat protein	5	79380	79375	80523	80523	1143	1148	1181	1181	Q4EBI3	COG:COG0666:ANKYR Ankyrin repeat [Category:T%2C Aligned:91-320%2C Eval:2.2e-23%2C score:94.5],MGA_1		31.3	31.3	80.8	80.4	92.3	92.3			TAC	ATG	TAG	TAG	Wolbachia endosymbiont of Drosophila ananassae						Wolbachia	Rickettsiales
GAGA-0028.Scaffold17.79380-82378	GAGA-0028	Myrmica rubra	Myrmicinae	Ankyrin repeats family protein	Wolbachia	Rickettsiales	Alphaproteobacteria	Scaffold17	79380-82378	Scaffold17:79380-82378	79380	82378	2998	22	27	19	ankyrin repeat protein	5	80591	80591	80944	80944	353	353	271	271	A0A5B9JVP8			74.6	74.6	97.4	97.4	32.7	32.7	4.4e-42	4.4e-42	ATG	ATG	TAA	TAA	Wolbachia endosymbiont of Drosophila ananassae						Wolbachia	Rickettsiales
GAGA-0028.Scaffold18.2143551-2146148	GAGA-0028	Myrmica rubra	Myrmicinae	Ankyrin repeat protein	Wolbachia	Rickettsiales	Alphaproteobacteria	Scaffold18	2143551-2146148	Scaffold18:2143551-2146148	2143551	2146148	2597	49	47	39	ankyrin repeat protein	1	2143551	2143444	2146148	2146152	2597	2708	1949	1973	E9P653	COG:COG0666:ANKYR Ankyrin repeat [Category:T%2C Aligned:417-587%2C Eval:1.5e-17%2C score:79.9],COG:COG0666:ANKYR Ankyrin repeat [Category:T%2C Aligned:103-309%2C Eval:1.9e-17%2C score:79.9],COG:COG0666:ANKYR Ankyrin repeat [Category:T%2C Aligned:519-681%2C Eval:6.5e-17%2C score:77.9%2C N-term missing],COG:COG0666:ANKYR Ankyrin repeat [Category:T%2C Aligned:29-158%2C Eval:1.0e-15%2C score:74.5%2C …	TIGR:TIGR00870%3B trp: transient-receptor-potential calcium channel protein [Name:TIGR00870%2C Eval:1.5e-46%2C score:156.8%2C bias:19.7],COG:COG0666:ANKYR Ankyrin repeat [Category:T%2C Aligned:417-587%2C Eval:1.5e-17%2C score:79.9],COG:COG0666:ANKYR Ankyrin repeat [Category:T%2C Aligned:103-309%2C Eval:1.9e-17%2C score:79.9],COG:COG0666:ANKYR Ankyrin repeat [Category:T%2C Aligned:519-681%2C Eval:…	57.7	57.6	77.3	74.3	67.1	67.2	5.3e-210	4.2e-210	ATA	ATG	TAG	TAA	Wolbachia endosymbiont wVitB of Nasonia vitripennis phage WOVitB						unclassified Myoviridae	Caudoviricetes
GAGA-0028.Scaffold187.324335-327944	GAGA-0028	Myrmica rubra	Myrmicinae	Ankyrin 3 (Ankyrin repeat family protein)	Wolbachia	Rickettsiales	Alphaproteobacteria	Scaffold187	324335-327944	Scaffold187:324335-327944	324335	327944	3609	27	27	21	ankyrin repeat protein	3	326590	326590	327944	327948	1354	1358	320	320	Q4EBI3	COG:COG0666:ANKYR Ankyrin repeat [Category:T%2C Aligned:240-376%2C Eval:1.4e-19%2C score:84.9%2C N-term missing],COG:COG0666:ANKYR Ankyrin repeat [Category:T%2C Aligned:38-225%2C Eval:3.9e-19%2C score:83.3],MGA_3	TIGR:TIGR00870%3B trp: transient-receptor-potential calcium channel protein [Name:TIGR00870%2C Eval:6.8e-39%2C score:131.5%2C bias:14.0],COG:COG0666:ANKYR Ankyrin repeat [Category:T%2C Aligned:240-376%2C Eval:1.4e-19%2C score:84.9%2C N-term missing],COG:COG0666:ANKYR Ankyrin repeat [Category:T%2C Aligned:38-225%2C Eval:3.9e-19%2C score:83.3],MGA_3	56.1	56.1	91.8	91.4	66.1	66.1	6.9e-114	7.0e-114	ATA	ATG	TGA	TGA	Wolbachia endosymbiont of Drosophila ananassae						Wolbachia	Rickettsiales
GAGA-0028.Scaffold187.324335-327944	GAGA-0028	Myrmica rubra	Myrmicinae	Ankyrin repeat protein	Wolbachia	Rickettsiales	Alphaproteobacteria	Scaffold187	324335-327944	Scaffold187:324335-327944	324335	327944	3609	27	27	21	ankyrin repeat protein	3	325043	325043	325894	325894	851	851	274	274	E9P653	COG:COG0666:ANKYR Ankyrin repeat [Category:T%2C Aligned:39-238%2C Eval:2.9e-16%2C score:73.3],MGA_2	TIGR:TIGR00870%3B trp: transient-receptor-potential calcium channel protein [Name:TIGR00870%2C Eval:3.1e-15%2C score:53.2%2C bias:7.8],COG:COG0666:ANKYR Ankyrin repeat [Category:T%2C Aligned:39-238%2C Eval:2.9e-16%2C score:73.3],MGA_2	72.3	72.3	99.3	99.3	30.5	30.5	3.3e-106	3.3e-106	TTG	TTG	TAG	TAG	Wolbachia endosymbiont wVitB of Nasonia vitripennis phage WOVitB						unclassified Myoviridae	Caudoviricetes
GAGA-0028.Scaffold187.324335-327944	GAGA-0028	Myrmica rubra	Myrmicinae	Ankyrin repeats family protein	Wolbachia	Rickettsiales	Alphaproteobacteria	Scaffold187	324335-327944	Scaffold187:324335-327944	324335	327944	3609	27	27	21	ankyrin repeat protein	3	324335	324297	325025	325025	690	728	319	333	A0A5B9JVP8			60.2	59.9	100.0	96.3	73.4	74.2	3.3e-75	1.7e-75	ATG	ATG	TAG	TAG	Wolbachia endosymbiont of Drosophila ananassae						Wolbachia	Rickettsiales
GAGA-0028.Scaffold21.3359731-3360234	GAGA-0028	Myrmica rubra	Myrmicinae	Ankyrin repeats family protein	Wolbachia	Rickettsiales	Alphaproteobacteria	Scaffold21	3359731-3360234	Scaffold21:3359731-3360234	3359731	3360234	503	16	19	15	ankyrin repeat protein	1	3359731	3358732	3360213	3360213	482	1481	68	417	A0A5B9JVP8			67.5	67.8	100.0	100.0	44.7	53.5	1.9e-50	2.0e-186	CTT	CAT	TAA	TAA	Wolbachia endosymbiont of Drosophila ananassae						Wolbachia	Rickettsiales
GAGA-0028.Scaffold217.297424-303832	GAGA-0028	Myrmica rubra	Myrmicinae	DNA repair protein RadC	Wolbachia	Rickettsiales	Alphaproteobacteria	Scaffold217	297424-303832	Scaffold217:297424-303832	297424	303832	6408	25	38	19	protein_vapar_x000D__x000D_ Protein Pnap	9	299543	299543	300010	300010	467	467	2	2	A0A6M5E574		TIGR:TIGR00608%3B radc: DNA repair protein RadC [Name:TIGR00608%2C Eval:8.8e-16%2C score:56.3%2C bias:0.1],Domain:cl26989:RadC DNA repair protein RadC%2C contains a helix-hairpin-helix DNA-binding motif [Replication%2C recombination and repair]. The genes in this family for which the functions are known have an as yet porrly defined role in determining sensitivity to DNA damaging agents such as U…	97.4	97.4	98.1	98.1	68.5	68.5	8.0e-76	8.0e-76	ATG	ATG	TAG	TAG	Wolbachia endosymbiont of Diaphorina citri	GO:0008237; GO:0046872	metal ion binding [GO:0046872]; metallopeptidase activity [GO:0008237]		metal ion binding [GO:0046872]; metallopeptidase activity [GO:0008237]		Wolbachia	Rickettsiales
GAGA-0028.Scaffold217.297424-303832	GAGA-0028	Myrmica rubra	Myrmicinae	DNA repair protein RadC	Wolbachia	Rickettsiales	Alphaproteobacteria	Scaffold217	297424-303832	Scaffold217:297424-303832	297424	303832	6408	25	38	19	protein_vapar_x000D__x000D_ Protein Pnap	9	301250	301250	301756	301756	506	506	1	1	A0A6M5E574		TIGR:TIGR00608%3B radc: DNA repair protein RadC [Name:TIGR00608%2C Eval:1.7e-16%2C score:58.6%2C bias:0.1],Domain:cl26989:RadC DNA repair protein RadC%2C contains a helix-hairpin-helix DNA-binding motif [Replication%2C recombination and repair]. The genes in this family for which the functions are known have an as yet porrly defined role in determining sensitivity to DNA damaging agents such as U…	97.4	97.4	92.9	92.9	70.3	70.3	6.5e-78	6.5e-78	ATG	ATG	TAA	TAA	Wolbachia endosymbiont of Diaphorina citri	GO:0008237; GO:0046872	metal ion binding [GO:0046872]; metallopeptidase activity [GO:0008237]		metal ion binding [GO:0046872]; metallopeptidase activity [GO:0008237]		Wolbachia	Rickettsiales
GAGA-0028.Scaffold217.297424-303832	GAGA-0028	Myrmica rubra	Myrmicinae	Helix-turn-helix transcriptional regulator	Wolbachia	Rickettsiales	Alphaproteobacteria	Scaffold217	297424-303832	Scaffold217:297424-303832	297424	303832	6408	25	38	19	protein_vapar_x000D__x000D_ Protein Pnap	9	301956	301956	302327	302327	371	371	0	0	A0A7G5CAE0			84.6	84.6	100.0	100.0	39.7	39.7	5.8e-50	5.8e-50	TTG	TTG	TAA	TAA	Wolbachia pipientis	GO:0003677	DNA binding [GO:0003677]		DNA binding [GO:0003677]		Wolbachia	Rickettsiales
GAGA-0028.Scaffold217.297424-303832	GAGA-0028	Myrmica rubra	Myrmicinae	Helix-turn-helix transcriptional regulator	Wolbachia	Rickettsiales	Alphaproteobacteria	Scaffold217	297424-303832	Scaffold217:297424-303832	297424	303832	6408	25	38	19	protein_vapar_x000D__x000D_ Protein Pnap	9	298489	298489	299343	299343	854	854	0	0	A0A7G5CAE0			87.0	87.0	100.0	100.0	93.0	93.0			TTG	TTG	TAA	TAA	Wolbachia pipientis	GO:0003677	DNA binding [GO:0003677]		DNA binding [GO:0003677]		Wolbachia	Rickettsiales
GAGA-0028.Scaffold217.297424-303832	GAGA-0028	Myrmica rubra	Myrmicinae	ISSod10, transposase OrfA, putative (Winged helix-turn helix family protein)	Wolbachia	Rickettsiales	Alphaproteobacteria	Scaffold217	297424-303832	Scaffold217:297424-303832	297424	303832	6408	25	38	19	protein_vapar_x000D__x000D_ Protein Pnap	9	300948	300948	301205	301205	257	257	27	27	Q4EAU6			93.1	93.1	84.7	84.7	44.4	44.4	1.0e-27	1.0e-27	ATG	ATG	TAA	TAA	Wolbachia endosymbiont of Drosophila ananassae						Wolbachia	Rickettsiales
GAGA-0028.Scaffold217.297424-303832	GAGA-0028	Myrmica rubra	Myrmicinae	Transposase	Wolbachia	Rickettsiales	Alphaproteobacteria	Scaffold217	297424-303832	Scaffold217:297424-303832	297424	303832	6408	25	38	19	protein_vapar_x000D__x000D_ Protein Pnap	9	297424	297417	298337	298337	913	920	50	50	A0A178GX68	COG:COG5464:YadD Predicted transposase YdaD [Category:L%2C Aligned:249-299%2C Eval:3.9e-07%2C score:47.4%2C N-term missing],MGA_1		76.6	76.5	96.7	97.1	97.3	98.3			ATG	ATG	AAA	TAA	Wolbachia endosymbiont of Dactylopius coccus						Wolbachia	Rickettsiales
GAGA-0028.Scaffold217.297424-303832	GAGA-0028	Myrmica rubra	Myrmicinae	Transposase	Wolbachia	Rickettsiales	Alphaproteobacteria	Scaffold217	297424-303832	Scaffold217:297424-303832	297424	303832	6408	25	38	19	protein_vapar_x000D__x000D_ Protein Pnap	9	302963	302963	303211	303211	248	248	39	39	A0A178GYM1		TIGR:TIGR01784%3B T_den_put_tspse: conserved hypothetical protein [Name:TIGR01784%2C Eval:1.3e-09%2C score:36.2%2C bias:0.5],MGA_8	90.4	90.4	89.0	89.0	23.9	23.9	6.6e-30	6.6e-30	ATG	ATG	TAG	TAG	Wolbachia endosymbiont of Dactylopius coccus						Wolbachia	Rickettsiales
GAGA-0028.Scaffold217.297424-303832	GAGA-0028	Myrmica rubra	Myrmicinae	Transposase family protein	Wolbachia	Rickettsiales	Alphaproteobacteria	Scaffold217	297424-303832	Scaffold217:297424-303832	297424	303832	6408	25	38	19	protein_vapar_x000D__x000D_ Protein Pnap	9	300742	300742	301026	301026	284	284	1	1	Q4EDH0			83.7	83.7	91.5	91.5	27.0	27.0	1.1e-32	1.1e-32	GTG	GTG	TAA	TAA	Wolbachia endosymbiont of Drosophila ananassae	GO:0003676	nucleic acid binding [GO:0003676]		nucleic acid binding [GO:0003676]		Wolbachia	Rickettsiales
GAGA-0028.Scaffold217.297424-303832	GAGA-0028	Myrmica rubra	Myrmicinae	Uncharacterized protein	Wolbachia	Rickettsiales	Alphaproteobacteria	Scaffold217	297424-303832	Scaffold217:297424-303832	297424	303832	6408	25	38	19	protein_vapar_x000D__x000D_ Protein Pnap	9	303224	303224	303832	303835	608	611	144	144	B6Y9U6		TIGR:TIGR01784%3B T_den_put_tspse: conserved hypothetical protein [Name:TIGR01784%2C Eval:1.6e-29%2C score:101.5%2C bias:8.3],MGA_9	79.2	79.2	100.0	100.0	63.3	63.3	3.2e-88	3.2e-88	ATG	ATG	CTG	TAA	Wolbachia endosymbiont of Culex quinquefasciatus JHB						Wolbachia	Rickettsiales
GAGA-0028.Scaffold22.1297266-1298876	GAGA-0028	Myrmica rubra	Myrmicinae	Ankyrin repeat domain protein	Wolbachia	Rickettsiales	Alphaproteobacteria	Scaffold22	1297266-1298876	Scaffold22:1297266-1298876	1297266	1298876	1610	21	25	21	ankyrin repeat protein	3	1297266	1297531	1297459	1297833	193	302	29	48	C0R3E9	COG:COG0666:ANKYR Ankyrin repeat [Category:T%2C Aligned:3-60%2C Eval:4.9e-08%2C score:44.4%2C N-term missing],MGA_1	TIGR:TIGR00870%3B trp: transient-receptor-potential calcium channel protein [Name:TIGR00870%2C Eval:9.0e-07%2C score:25.3%2C bias:0.1],COG:COG0666:ANKYR Ankyrin repeat [Category:T%2C Aligned:3-60%2C Eval:4.9e-08%2C score:44.4%2C N-term missing],MGA_1	74.1	77.0	92.1	100.0	2.3	4.0	2.4e-16	1.8e-35	AAC	TTG	TAA	TAA	Wolbachia sp. subsp. Drosophila simulans (strain wRi)						Wolbachia	Rickettsiales
GAGA-0028.Scaffold22.1297266-1298876	GAGA-0028	Myrmica rubra	Myrmicinae	Ankyrin repeat domain protein	Wolbachia	Rickettsiales	Alphaproteobacteria	Scaffold22	1297266-1298876	Scaffold22:1297266-1298876	1297266	1298876	1610	21	25	21	ankyrin repeat protein	3	1297531	1297531	1297833	1297833	302	302	45	48	C0R3E9			77.0	77.0	100.0	100.0	4.0	4.0	1.8e-35	1.8e-35	TTG	TTG	TAA	TAA	Wolbachia sp. subsp. Drosophila simulans (strain wRi)						Wolbachia	Rickettsiales
GAGA-0028.Scaffold22.1297266-1298876	GAGA-0028	Myrmica rubra	Myrmicinae		Wolbachia	Rickettsiales	Alphaproteobacteria	Scaffold22	1297266-1298876	Scaffold22:1297266-1298876	1297266	1298876	1610	21	25	21	ankyrin repeat protein	3	1298373	1297531	1298531	1297833	158	302	20	48					77.0		100.0		4.0		1.8e-35	GTG	TTG	TAA	TAA
GAGA-0028.Scaffold245.97502-97693	GAGA-0028	Myrmica rubra	Myrmicinae		Wolbachia	Rickettsiales	Alphaproteobacteria	Scaffold245	97502-97693	Scaffold245:97502-97693	97502	97693	191	22	22	22	hypothetical protein	2	97502	97438	97563	97563	61	125	0	0												ATG	ATG	TGG	TAA
GAGA-0028.Scaffold245.97502-97693	GAGA-0028	Myrmica rubra	Myrmicinae		Wolbachia	Rickettsiales	Alphaproteobacteria	Scaffold245	97502-97693	Scaffold245:97502-97693	97502	97693	191	22	22	22	hypothetical protein	2	97619	97438	97693	97563	74	125	0	0												AAA	ATG	TAA	TAA
GAGA-0028.Scaffold26.1610767-1611574	GAGA-0028	Myrmica rubra	Myrmicinae	Ankyrin repeats family protein	Wolbachia	Rickettsiales	Alphaproteobacteria	Scaffold26	1610767-1611574	Scaffold26:1610767-1611574	1610767	1611574	807	21	25	20	ankyrin repeat protein	2	1610767	1610555	1611235	1611235	468	680	1	14	A0A5B9JVP8			70.3	69.6	100.0	70.4	45.3	46.1	3.5e-55	2.8e-55	ATG	ATG	TAG	TAA	Wolbachia endosymbiont of Drosophila ananassae						Wolbachia	Rickettsiales
GAGA-0028.Scaffold26.1610767-1611574	GAGA-0028	Myrmica rubra	Myrmicinae	Ankyrin repeats family protein	Wolbachia	Rickettsiales	Alphaproteobacteria	Scaffold26	1610767-1611574	Scaffold26:1610767-1611574	1610767	1611574	807	21	25	20	ankyrin repeat protein	2	1611241	1611241	1611574	1612098	333	857	7	14	A0A5B9JVP8	COG:COG0666:ANKYR Ankyrin repeat [Category:T%2C Aligned:1-74%2C Eval:1.5e-10%2C score:53.3%2C C-term missing],MGA_2	TIGR:TIGR00870%3B trp: transient-receptor-potential calcium channel protein [Name:TIGR00870%2C Eval:1.9e-08%2C score:30.8%2C bias:0.1],COG:COG0666:ANKYR Ankyrin repeat [Category:T%2C Aligned:1-74%2C Eval:1.5e-10%2C score:53.3%2C C-term missing],MGA_2	66.7	60.9	97.3	47.7	32.7	39.5	1.2e-34	5.0e-38	TAA	TTG	TAA	TAA	Wolbachia endosymbiont of Drosophila ananassae						Wolbachia	Rickettsiales
GAGA-0028.Scaffold26.1660761-1663938	GAGA-0028	Myrmica rubra	Myrmicinae	Ankyrin 3 (Ankyrin repeat family protein)	Wolbachia	Rickettsiales	Alphaproteobacteria	Scaffold26	1660761-1663938	Scaffold26:1660761-1663938	1660761	1663938	3177	17	17	17	phosphocholine_transferase_AnkX	2	1663727	1663727	1663938	1663942	211	215	3	3	Q4EBI3			85.9	84.6	92.8	91.5	10.4	10.5	2.6e-21	1.9e-21	ATA	ATG	TAA	TAA	Wolbachia endosymbiont of Drosophila ananassae						Wolbachia	Rickettsiales
GAGA-0028.Scaffold26.1660761-1663938	GAGA-0028	Myrmica rubra	Myrmicinae	Ankyrin repeat protein	Wolbachia	Rickettsiales	Alphaproteobacteria	Scaffold26	1660761-1663938	Scaffold26:1660761-1663938	1660761	1663938	3177	17	17	17	phosphocholine_transferase_AnkX	2	1660761	1660750	1663677	1663677	2916	2927	98	98	E9P653	COG:COG0666:ANKYR Ankyrin repeat [Category:T%2C Aligned:462-651%2C Eval:4.7e-23%2C score:96.0],COG:COG0666:ANKYR Ankyrin repeat [Category:T%2C Aligned:561-786%2C Eval:2.4e-18%2C score:82.6],COG:COG0666:ANKYR Ankyrin repeat [Category:T%2C Aligned:9-152%2C Eval:9.6e-17%2C score:77.9%2C N-term missing],COG:COG0666:ANKYR Ankyrin repeat [Category:T%2C Aligned:245-463%2C Eval:6.3e-13%2C score:66.8],COG…	TIGR:TIGR00870%3B trp: transient-receptor-potential calcium channel protein [Name:TIGR00870%2C Eval:3.3e-47%2C score:159.0%2C bias:28.6],COG:COG0666:ANKYR Ankyrin repeat [Category:T%2C Aligned:462-651%2C Eval:4.7e-23%2C score:96.0],COG:COG0666:ANKYR Ankyrin repeat [Category:T%2C Aligned:561-786%2C Eval:2.4e-18%2C score:82.6],COG:COG0666:ANKYR Ankyrin repeat [Category:T%2C Aligned:9-152%2C Eval:9.…	65.0	65.0	60.6	60.4	62.6	62.6	1.3e-209	1.3e-209	ATG	ATG	TAG	TAA	Wolbachia endosymbiont wVitB of Nasonia vitripennis phage WOVitB						unclassified Myoviridae	Caudoviricetes
GAGA-0028.Scaffold26.1672022-1677598	GAGA-0028	Myrmica rubra	Myrmicinae	Ankyrin 3 (Ankyrin repeat family protein)	Wolbachia	Rickettsiales	Alphaproteobacteria	Scaffold26	1672022-1677598	Scaffold26:1672022-1677598	1672022	1677598	5576	28	37	24	Phosphocholine_transferase AnkX_x000D__x000D_ Ankyrin homolog_x000D__x000D_ anykrin repeat protein	4	1675013	1675013	1675534	1675534	521	521	7	7	Q4EBI3	COG:COG0666:ANKYR Ankyrin repeat [Category:T%2C Aligned:37-150%2C Eval:8.3e-14%2C score:64.1%2C C-term missing],MGA_3	TIGR:TIGR00870%3B trp: transient-receptor-potential calcium channel protein [Name:TIGR00870%2C Eval:1.6e-08%2C score:31.0%2C bias:0.1],COG:COG0666:ANKYR Ankyrin repeat [Category:T%2C Aligned:37-150%2C Eval:8.3e-14%2C score:64.1%2C C-term missing],MGA_3	54.0	54.0	92.5	92.5	32.3	32.3	5.6e-45	5.6e-45	ATG	ATG	TAA	TAA	Wolbachia endosymbiont of Drosophila ananassae						Wolbachia	Rickettsiales
GAGA-0028.Scaffold26.1672022-1677598	GAGA-0028	Myrmica rubra	Myrmicinae	Ankyrin 3 (Ankyrin repeat family protein)	Wolbachia	Rickettsiales	Alphaproteobacteria	Scaffold26	1672022-1677598	Scaffold26:1672022-1677598	1672022	1677598	5576	28	37	24	Phosphocholine_transferase AnkX_x000D__x000D_ Ankyrin homolog_x000D__x000D_ anykrin repeat protein	4	1676064	1676064	1677598	1677602	1534	1538	44	44	Q4EBI3	COG:COG0666:ANKYR Ankyrin repeat [Category:T%2C Aligned:41-238%2C Eval:6.6e-23%2C score:94.5],COG:COG0666:ANKYR Ankyrin repeat [Category:T%2C Aligned:312-447%2C Eval:8.4e-20%2C score:85.6%2C N-term missing],MGA_4		52.6	52.5	96.3	96.1	83.6	83.8			ATA	ATG	TAA	TAA	Wolbachia endosymbiont of Drosophila ananassae						Wolbachia	Rickettsiales
GAGA-0028.Scaffold26.1672022-1677598	GAGA-0028	Myrmica rubra	Myrmicinae	Ankyrin repeat protein	Wolbachia	Rickettsiales	Alphaproteobacteria	Scaffold26	1672022-1677598	Scaffold26:1672022-1677598	1672022	1677598	5576	28	37	24	Phosphocholine_transferase AnkX_x000D__x000D_ Ankyrin homolog_x000D__x000D_ anykrin repeat protein	4	1672560	1672560	1674350	1674350	1790	1790	33	33	E9P653	COG:COG0666:ANKYR Ankyrin repeat [Category:T%2C Aligned:244-379%2C Eval:3.6e-19%2C score:84.1%2C N-term missing],COG:COG0666:ANKYR Ankyrin repeat [Category:T%2C Aligned:67-277%2C Eval:2.0e-13%2C score:67.2],COG:COG0666:ANKYR Ankyrin repeat [Category:T%2C Aligned:9-120%2C Eval:3.3e-07%2C score:48.7%2C N-term missing],MGA_2	TIGR:TIGR00870%3B trp: transient-receptor-potential calcium channel protein [Name:TIGR00870%2C Eval:6.0e-21%2C score:72.1%2C bias:10.3],COG:COG0666:ANKYR Ankyrin repeat [Category:T%2C Aligned:244-379%2C Eval:3.6e-19%2C score:84.1%2C N-term missing],COG:COG0666:ANKYR Ankyrin repeat [Category:T%2C Aligned:67-277%2C Eval:2.0e-13%2C score:67.2],COG:COG0666:ANKYR Ankyrin repeat [Category:T%2C Aligned:…	66.8	66.8	93.0	93.0	61.8	61.8	1.8e-211	1.8e-211	GTG	GTG	TAG	TAG	Wolbachia endosymbiont wVitB of Nasonia vitripennis phage WOVitB						unclassified Myoviridae	Caudoviricetes
GAGA-0028.Scaffold26.1672022-1677598	GAGA-0028	Myrmica rubra	Myrmicinae	Ankyrin repeats family protein	Wolbachia	Rickettsiales	Alphaproteobacteria	Scaffold26	1672022-1677598	Scaffold26:1672022-1677598	1672022	1677598	5576	28	37	24	Phosphocholine_transferase AnkX_x000D__x000D_ Ankyrin homolog_x000D__x000D_ anykrin repeat protein	4	1672022	1671993	1672439	1672439	417	446	26	26	A0A5B9JVP8			66.4	66.4	96.4	90.5	38.4	38.4	3.0e-43	3.0e-43	ATG	ATG	TTT	TAA	Wolbachia endosymbiont of Drosophila ananassae						Wolbachia	Rickettsiales
GAGA-0028.Scaffold26.1790809-1793595	GAGA-0028	Myrmica rubra	Myrmicinae	Ankyrin repeat protein	Wolbachia	Rickettsiales	Alphaproteobacteria	Scaffold26	1790809-1793595	Scaffold26:1790809-1793595	1790809	1793595	2786	16	19	12	ankyrin repeat protein	1	1790809	1790804	1793595	1793632	2786	2828	335	345	E9P653	COG:COG0666:ANKYR Ankyrin repeat [Category:T%2C Aligned:4-186%2C Eval:6.3e-21%2C score:89.9],COG:COG0666:ANKYR Ankyrin repeat [Category:T%2C Aligned:103-314%2C Eval:6.5e-18%2C score:81.0],COG:COG0666:ANKYR Ankyrin repeat [Category:T%2C Aligned:593-715%2C Eval:8.8e-18%2C score:80.6%2C N-term missing],COG:COG0666:ANKYR Ankyrin repeat [Category:T%2C Aligned:463-624%2C Eval:7.5e-17%2C score:77.9],COG…		53.0	52.9	100.0	98.9	98.1	98.5			TAC	ATG	AGC	TAG	Wolbachia endosymbiont wVitB of Nasonia vitripennis phage WOVitB						unclassified Myoviridae	Caudoviricetes
GAGA-0028.Scaffold283.299552-303004	GAGA-0028	Myrmica rubra	Myrmicinae	Ankyrin repeat domain protein	Wolbachia	Rickettsiales	Alphaproteobacteria	Scaffold283	299552-303004	Scaffold283:299552-303004	299552	303004	3452	24	46	20	hypothetical protein	7	301904	302368	302239	302550	335	182	4	0	B6Y9L2			52.3		98.2		2.1		2.0e-18		TTG	ATG	TAG	TAG	Wolbachia endosymbiont of Culex quinquefasciatus JHB						Wolbachia	Rickettsiales
GAGA-0028.Scaffold283.299552-303004	GAGA-0028	Myrmica rubra	Myrmicinae	Ankyrin repeat domain-containing protein (Fragment)	Wolbachia	Rickettsiales	Alphaproteobacteria	Scaffold283	299552-303004	Scaffold283:299552-303004	299552	303004	3452	24	46	20	hypothetical protein	7	300650	301008	300799	301907	149	899	2	10	A0A6H2NUC3			62.5	31.5	98.0	95.0	20.5	35.0	1.1e-08	7.8e-24	ATG	ATG	TGA	TGA	Wolbachia pipientis						Wolbachia	Rickettsiales
GAGA-0028.Scaffold283.299552-303004	GAGA-0028	Myrmica rubra	Myrmicinae	Uncharacterized ANK	Wolbachia	Rickettsiales	Alphaproteobacteria	Scaffold283	299552-303004	Scaffold283:299552-303004	299552	303004	3452	24	46	20	hypothetical protein	7	301008	301904	301907	302239	899	335	10	4	A0A176Q8J2	COG:COG0666:ANKYR Ankyrin repeat [Category:T%2C Aligned:77-214%2C Eval:1.5e-11%2C score:60.2%2C N-term missing],COG:COG0666:ANKYR Ankyrin repeat [Category:T%2C Aligned:5-123%2C Eval:8.5e-11%2C score:57.9%2C C-term missing],MGA_5	TIGR:TIGR00870%3B trp: transient-receptor-potential calcium channel protein [Name:TIGR00870%2C Eval:2.9e-07%2C score:26.9%2C bias:0.5],COG:COG0666:ANKYR Ankyrin repeat [Category:T%2C Aligned:77-214%2C Eval:1.5e-11%2C score:60.2%2C N-term missing],COG:COG0666:ANKYR Ankyrin repeat [Category:T%2C Aligned:5-123%2C Eval:8.5e-11%2C score:57.9%2C C-term missing],MGA_5	31.5	52.3	95.0	98.2	35.0	2.1	7.8e-24	2.0e-18	ATG	TTG	TGA	TAG	Wolbachia endosymbiont of Laodelphax striatellus						Wolbachia	Rickettsiales
GAGA-0028.Scaffold283.299552-303004	GAGA-0028	Myrmica rubra	Myrmicinae	Uncharacterized protein	Wolbachia	Rickettsiales	Alphaproteobacteria	Scaffold283	299552-303004	Scaffold283:299552-303004	299552	303004	3452	24	46	20	hypothetical protein	7	299662	300145	299979	300270	317	125	10	2	A0A5C0YSC8			59.7		62.9		6.1		1.1e-13		TTG	ATG	TAA	TAG	Wolbachia endosymbiont of Chrysomya megacephala	GO:0043531	ADP binding [GO:0043531]		ADP binding [GO:0043531]		Wolbachia	Rickettsiales
GAGA-0028.Scaffold283.299552-303004	GAGA-0028	Myrmica rubra	Myrmicinae	Uncharacterized protein	Wolbachia	Rickettsiales	Alphaproteobacteria	Scaffold283	299552-303004	Scaffold283:299552-303004	299552	303004	3452	24	46	20	hypothetical protein	7	302648	302648	303004	303010	356	362	4	4	Q73HN8			65.5	65.5	94.9	93.3	34.0	34.0	1.6e-28	1.6e-28	CGT	ATG	TAA	TAA	Wolbachia pipientis wMel						Wolbachia	Rickettsiales
GAGA-0028.Scaffold283.299552-303004	GAGA-0028	Myrmica rubra	Myrmicinae		Wolbachia	Rickettsiales	Alphaproteobacteria	Scaffold283	299552-303004	Scaffold283:299552-303004	299552	303004	3452	24	46	20	hypothetical protein	7	299552	299662	299658	299979	106	317	19	24					59.7		62.9		6.1		1.1e-13	ATG	TTG	TGA	TAA
GAGA-0028.Scaffold283.299552-303004	GAGA-0028	Myrmica rubra	Myrmicinae		Wolbachia	Rickettsiales	Alphaproteobacteria	Scaffold283	299552-303004	Scaffold283:299552-303004	299552	303004	3452	24	46	20	hypothetical protein	7	300145	300650	300270	300799	125	149	2	2					62.5		98.0		20.5		1.1e-08	ATG	ATG	TAG	TGA
GAGA-0028.Scaffold304.96197-98794	GAGA-0028	Myrmica rubra	Myrmicinae	Ankyrin repeat protein	Wolbachia	Rickettsiales	Alphaproteobacteria	Scaffold304	96197-98794	Scaffold304:96197-98794	96197	98794	2597	19	24	19	ankyrin repeat protein	1	96197	96155	98794	98806	2597	2651	304	304	E9P653	COG:COG0666:ANKYR Ankyrin repeat [Category:T%2C Aligned:12-205%2C Eval:8.8e-19%2C score:83.7],COG:COG0666:ANKYR Ankyrin repeat [Category:T%2C Aligned:468-674%2C Eval:1.1e-18%2C score:83.3],COG:COG0666:ANKYR Ankyrin repeat [Category:T%2C Aligned:165-335%2C Eval:4.8e-11%2C score:61.0%2C N-term missing],COG:COG0666:ANKYR Ankyrin repeat [Category:T%2C Aligned:367-536%2C Eval:5.7e-11%2C score:60.6%2C …		56.7	56.7	99.9	98.0	85.6	85.6			GAC	ATG	GAA	TGA	Wolbachia endosymbiont wVitB of Nasonia vitripennis phage WOVitB						unclassified Myoviridae	Caudoviricetes
GAGA-0028.Scaffold32.266132-268636	GAGA-0028	Myrmica rubra	Myrmicinae	Ankyrin repeat protein	Wolbachia	Rickettsiales	Alphaproteobacteria	Scaffold32	266132-268636	Scaffold32:266132-268636	266132	268636	2504	19	13	11	ankyrin repeat protein	1	266132	266094	268636	268640	2504	2546	30	30	E9P653	COG:COG0666:ANKYR Ankyrin repeat [Category:T%2C Aligned:62-195%2C Eval:2.8e-18%2C score:82.2%2C N-term missing],COG:COG0666:ANKYR Ankyrin repeat [Category:T%2C Aligned:535-675%2C Eval:1.3e-14%2C score:71.4%2C N-term missing],COG:COG0666:ANKYR Ankyrin repeat [Category:T%2C Aligned:378-557%2C Eval:4.5e-10%2C score:57.9%2C N-term missing],COG:COG0666:ANKYR Ankyrin repeat [Category:T%2C Aligned:249-4…		56.2	56.1	100.0	98.8	98.1	98.5			ATA	ATG	TAG	TAG	Wolbachia endosymbiont wVitB of Nasonia vitripennis phage WOVitB						unclassified Myoviridae	Caudoviricetes
GAGA-0028.Scaffold349.122730-125124	GAGA-0028	Myrmica rubra	Myrmicinae	Ankyrin 3 (Ankyrin repeat family protein)	Wolbachia	Rickettsiales	Alphaproteobacteria	Scaffold349	122730-125124	Scaffold349:122730-125124	122730	125124	2394	13	15	13	ankyrin repeat protein	2	124363	124363	125124	125721	761	1358	36	40	Q4EBI3	COG:COG0666:ANKYR Ankyrin repeat [Category:T%2C Aligned:32-222%2C Eval:8.4e-22%2C score:88.0],MGA_2	TIGR:TIGR00870%3B trp: transient-receptor-potential calcium channel protein [Name:TIGR00870%2C Eval:8.3e-18%2C score:61.7%2C bias:4.0],COG:COG0666:ANKYR Ankyrin repeat [Category:T%2C Aligned:32-222%2C Eval:8.4e-22%2C score:88.0],MGA_2	45.5	56.7	81.8	88.7	34.4	69.5	5.8e-45	8.2e-123	CTT	ATG	TAA	TAA	Wolbachia endosymbiont of Drosophila ananassae						Wolbachia	Rickettsiales
GAGA-0028.Scaffold349.122730-125124	GAGA-0028	Myrmica rubra	Myrmicinae	Ankyrin repeat protein	Wolbachia	Rickettsiales	Alphaproteobacteria	Scaffold349	122730-125124	Scaffold349:122730-125124	122730	125124	2394	13	15	13	ankyrin repeat protein	2	122730	122671	123729	123729	999	1058	0	0	E9P653	COG:COG0666:ANKYR Ankyrin repeat [Category:T%2C Aligned:8-137%2C Eval:3.9e-18%2C score:79.5%2C N-term missing],MGA_1	TIGR:TIGR00870%3B trp: transient-receptor-potential calcium channel protein [Name:TIGR00870%2C Eval:2.9e-12%2C score:43.4%2C bias:5.1],COG:COG0666:ANKYR Ankyrin repeat [Category:T%2C Aligned:8-137%2C Eval:3.9e-18%2C score:79.5%2C N-term missing],MGA_1	66.9	66.8	99.4	94.6	35.1	35.3	1.2e-119	1.0e-119	TTG	TTG	GAA	TAA	Wolbachia endosymbiont wVitB of Nasonia vitripennis phage WOVitB						unclassified Myoviridae	Caudoviricetes
GAGA-0028.Scaffold4.7783586-7787641	GAGA-0028	Myrmica rubra	Myrmicinae		Wolbachia	Rickettsiales	Alphaproteobacteria	Scaffold4	7783586-7787641	Scaffold4:7783586-7787641	7783586	7787641	4055	40	23	18	ankyrin repeat protein RBE_0220	3	7785523	7785523	7785690	7785690	167	167	0	0												ATG	ATG	TGA	TGA
GAGA-0028.Scaffold4.7783586-7787641	GAGA-0028	Myrmica rubra	Myrmicinae	Ankyrin repeat protein	Wolbachia	Rickettsiales	Alphaproteobacteria	Scaffold4	7783586-7787641	Scaffold4:7783586-7787641	7783586	7787641	4055	40	23	18	ankyrin repeat protein RBE_0220	3	7785720	7785720	7787641	7787645	1921	1925	309	309	E9P653	COG:COG0666:ANKYR Ankyrin repeat [Category:T%2C Aligned:103-307%2C Eval:6.5e-19%2C score:83.3],COG:COG0666:ANKYR Ankyrin repeat [Category:T%2C Aligned:338-556%2C Eval:7.9e-12%2C score:62.5],COG:COG0666:ANKYR Ankyrin repeat [Category:T%2C Aligned:5-130%2C Eval:6.9e-09%2C score:54.1%2C N-term missing],MGA_3	TIGR:TIGR00870%3B trp: transient-receptor-potential calcium channel protein [Name:TIGR00870%2C Eval:1.2e-38%2C score:130.6%2C bias:15.7],COG:COG0666:ANKYR Ankyrin repeat [Category:T%2C Aligned:103-307%2C Eval:6.5e-19%2C score:83.3],COG:COG0666:ANKYR Ankyrin repeat [Category:T%2C Aligned:338-556%2C Eval:7.9e-12%2C score:62.5],COG:COG0666:ANKYR Ankyrin repeat [Category:T%2C Aligned:5-130%2C Eval:6.…	65.8	65.7	94.1	93.9	64.1	64.2	6.9e-225	5.3e-225	ATA	ATG	TAG	TAG	Wolbachia endosymbiont wVitB of Nasonia vitripennis phage WOVitB						unclassified Myoviridae	Caudoviricetes
GAGA-0028.Scaffold4.7783586-7787641	GAGA-0028	Myrmica rubra	Myrmicinae	Ankyrin repeat protein	Wolbachia	Rickettsiales	Alphaproteobacteria	Scaffold4	7783586-7787641	Scaffold4:7783586-7787641	7783586	7787641	4055	40	23	18	ankyrin repeat protein RBE_0220	3	7783835	7783835	7785076	7785076	1241	1241	375	375	E9P653	COG:COG0666:ANKYR Ankyrin repeat [Category:T%2C Aligned:177-306%2C Eval:1.1e-18%2C score:81.8%2C N-term missing],COG:COG0666:ANKYR Ankyrin repeat [Category:T%2C Aligned:70-211%2C Eval:7.1e-15%2C score:70.6%2C N-term missing],COG:COG0666:ANKYR Ankyrin repeat [Category:T%2C Aligned:7-113%2C Eval:2.7e-09%2C score:54.4%2C C-term missing],MGA_1	TIGR:TIGR00870%3B trp: transient-receptor-potential calcium channel protein [Name:TIGR00870%2C Eval:3.3e-16%2C score:56.5%2C bias:11.5],COG:COG0666:ANKYR Ankyrin repeat [Category:T%2C Aligned:177-306%2C Eval:1.1e-18%2C score:81.8%2C N-term missing],COG:COG0666:ANKYR Ankyrin repeat [Category:T%2C Aligned:70-211%2C Eval:7.1e-15%2C score:70.6%2C N-term missing],COG:COG0666:ANKYR Ankyrin repeat [Cate…	67.5	67.5	99.0	99.0	43.7	43.7	1.4e-147	1.4e-147	ATG	ATG	TAA	TAA	Wolbachia endosymbiont wVitB of Nasonia vitripennis phage WOVitB						unclassified Myoviridae	Caudoviricetes
GAGA-0028.Scaffold4.7911209-7914591	GAGA-0028	Myrmica rubra	Myrmicinae	Ankyrin 3 (Ankyrin repeat family protein)	Wolbachia	Rickettsiales	Alphaproteobacteria	Scaffold4	7911209-7914591	Scaffold4:7911209-7914591	7911209	7914591	3382	18	12	6	ankyrin repeat protein	2	7913596	7913596	7914591	7915110	995	1514	63	119	Q4EBI3	COG:COG0666:ANKYR Ankyrin repeat [Category:T%2C Aligned:1-125%2C Eval:9.4e-20%2C score:83.7%2C N-term missing],COG:COG0666:ANKYR Ankyrin repeat [Category:T%2C Aligned:71-276%2C Eval:1.5e-18%2C score:80.6],MGA_2	TIGR:TIGR00870%3B trp: transient-receptor-potential calcium channel protein [Name:TIGR00870%2C Eval:2.9e-38%2C score:129.4%2C bias:15.1],COG:COG0666:ANKYR Ankyrin repeat [Category:T%2C Aligned:1-125%2C Eval:9.4e-20%2C score:83.7%2C N-term missing],COG:COG0666:ANKYR Ankyrin repeat [Category:T%2C Aligned:71-276%2C Eval:1.5e-18%2C score:80.6],MGA_2	53.4	50.0	96.1	96.0	50.2	66.1	4.1e-80	6.4e-119	ACA	ATG	TAA	TAA	Wolbachia endosymbiont of Drosophila ananassae						Wolbachia	Rickettsiales
GAGA-0028.Scaffold4.7911209-7914591	GAGA-0028	Myrmica rubra	Myrmicinae	Ankyrin repeat protein	Wolbachia	Rickettsiales	Alphaproteobacteria	Scaffold4	7911209-7914591	Scaffold4:7911209-7914591	7911209	7914591	3382	18	12	6	ankyrin repeat protein	2	7911209	7911171	7912823	7912823	1614	1652	132	132	E9P653	COG:COG0666:ANKYR Ankyrin repeat [Category:T%2C Aligned:192-321%2C Eval:8.1e-19%2C score:82.9%2C N-term missing],COG:COG0666:ANKYR Ankyrin repeat [Category:T%2C Aligned:67-230%2C Eval:8.5e-14%2C score:68.3%2C N-term missing],MGA_1	TIGR:TIGR00870%3B trp: transient-receptor-potential calcium channel protein [Name:TIGR00870%2C Eval:5.3e-21%2C score:72.3%2C bias:9.4],COG:COG0666:ANKYR Ankyrin repeat [Category:T%2C Aligned:192-321%2C Eval:8.1e-19%2C score:82.9%2C N-term missing],COG:COG0666:ANKYR Ankyrin repeat [Category:T%2C Aligned:67-230%2C Eval:8.5e-14%2C score:68.3%2C N-term missing],MGA_1	70.5	70.3	100.0	98.4	57.5	57.8	3.5e-211	1.6e-211	TTG	TTG	TAG	TAG	Wolbachia endosymbiont wVitB of Nasonia vitripennis phage WOVitB						unclassified Myoviridae	Caudoviricetes
GAGA-0028.Scaffold4.8001017-8003348	GAGA-0028	Myrmica rubra	Myrmicinae	Ankyrin 3 (Ankyrin repeat family protein)	Wolbachia	Rickettsiales	Alphaproteobacteria	Scaffold4	8001017-8003348	Scaffold4:8001017-8003348	8001017	8003348	2331	31	22	18	ankyrin repeat protein	3	8003112	8003112	8003348	8003387	236	275	281	281	Q4EBI3	COG:COG0666:ANKYR Ankyrin repeat [Category:T%2C Aligned:1-66%2C Eval:1.4e-07%2C score:43.7%2C C-term missing],MGA_3		66.2	61.0	83.3	86.8	11.0	13.3	7.2e-16	1.8e-19	AAA	TTG	TGA	TGA	Wolbachia endosymbiont of Drosophila ananassae						Wolbachia	Rickettsiales
GAGA-0028.Scaffold4.8001017-8003348	GAGA-0028	Myrmica rubra	Myrmicinae	Ankyrin repeat protein	Wolbachia	Rickettsiales	Alphaproteobacteria	Scaffold4	8001017-8003348	Scaffold4:8001017-8003348	8001017	8003348	2331	31	22	18	ankyrin repeat protein	3	8001017	8000979	8002661	8002661	1644	1682	2095	2125	E9P653	COG:COG0666:ANKYR Ankyrin repeat [Category:T%2C Aligned:199-326%2C Eval:2.1e-19%2C score:84.5%2C N-term missing],COG:COG0666:ANKYR Ankyrin repeat [Category:T%2C Aligned:117-260%2C Eval:9.3e-15%2C score:71.0%2C N-term missing],COG:COG0666:ANKYR Ankyrin repeat [Category:T%2C Aligned:1-135%2C Eval:7.6e-11%2C score:59.5%2C C-term missing],MGA_1	TIGR:TIGR00870%3B trp: transient-receptor-potential calcium channel protein [Name:TIGR00870%2C Eval:8.2e-25%2C score:84.9%2C bias:2.1],COG:COG0666:ANKYR Ankyrin repeat [Category:T%2C Aligned:199-326%2C Eval:2.1e-19%2C score:84.5%2C N-term missing],COG:COG0666:ANKYR Ankyrin repeat [Category:T%2C Aligned:117-260%2C Eval:9.3e-15%2C score:71.0%2C N-term missing],COG:COG0666:ANKYR Ankyrin repeat [Cate…	67.4	67.3	100.0	98.4	58.6	58.9	1.6e-198	7.2e-199	TTG	TTG	TAG	TAG	Wolbachia endosymbiont wVitB of Nasonia vitripennis phage WOVitB						unclassified Myoviridae	Caudoviricetes
GAGA-0028.Scaffold4.8001017-8003348	GAGA-0028	Myrmica rubra	Myrmicinae	Ankyrin repeat protein	Wolbachia	Rickettsiales	Alphaproteobacteria	Scaffold4	8001017-8003348	Scaffold4:8001017-8003348	8001017	8003348	2331	31	22	18	ankyrin repeat protein	3	8002679	8002679	8003164	8003164	485	485	313	313	E9P653	COG:COG0666:ANKYR Ankyrin repeat [Category:T%2C Aligned:35-142%2C Eval:1.2e-12%2C score:60.6%2C N-term missing],MGA_2		31.7	31.7	83.2	83.2	77.0	77.0			ATG	ATG	TAG	TAG	Wolbachia endosymbiont wVitB of Nasonia vitripennis phage WOVitB						unclassified Myoviridae	Caudoviricetes
GAGA-0028.Scaffold4.8032355-8034749	GAGA-0028	Myrmica rubra	Myrmicinae	Ankyrin repeat protein	Wolbachia	Rickettsiales	Alphaproteobacteria	Scaffold4	8032355-8034749	Scaffold4:8032355-8034749	8032355	8034749	2394	25	25	21	phosphocholine_transferase_AnkX	1	8032355	8032317	8034749	8035424	2394	3107	2007	2345	E9P653	COG:COG0666:ANKYR Ankyrin repeat [Category:T%2C Aligned:452-588%2C Eval:3.0e-18%2C score:81.8%2C N-term missing],COG:COG0666:ANKYR Ankyrin repeat [Category:T%2C Aligned:92-316%2C Eval:1.0e-16%2C score:77.6],COG:COG0666:ANKYR Ankyrin repeat [Category:T%2C Aligned:1-102%2C Eval:2.0e-08%2C score:52.9%2C N-term missing],COG:COG0666:ANKYR Ankyrin repeat [Category:T%2C Aligned:207-432%2C Eval:5.7e-08%2…		67.4	63.5	100.0	88.3	85.4	97.4			CTT	ATG	TAG	TAG	Wolbachia endosymbiont wVitB of Nasonia vitripennis phage WOVitB						unclassified Myoviridae	Caudoviricetes
GAGA-0028.Scaffold42.1475721-1478092	GAGA-0028	Myrmica rubra	Myrmicinae	Ankyrin repeat protein	Wolbachia	Rickettsiales	Alphaproteobacteria	Scaffold42	1475721-1478092	Scaffold42:1475721-1478092	1475721	1478092	2371	28	27	24	ankyrin_repeat_protein_x000D__x000D_ phosphocholine_transferase_AnkX	3	1475721	1475313	1476494	1476494	773	1181	0	0	E9P653	COG:COG0666:ANKYR Ankyrin repeat [Category:T%2C Aligned:1-142%2C Eval:2.5e-14%2C score:67.5%2C N-term missing],COG:COG0666:ANKYR Ankyrin repeat [Category:T%2C Aligned:77-257%2C Eval:1.7e-09%2C score:53.7],MGA_1	TIGR:TIGR00870%3B trp: transient-receptor-potential calcium channel protein [Name:TIGR00870%2C Eval:3.1e-14%2C score:49.9%2C bias:7.4],COG:COG0666:ANKYR Ankyrin repeat [Category:T%2C Aligned:1-142%2C Eval:2.5e-14%2C score:67.5%2C N-term missing],COG:COG0666:ANKYR Ankyrin repeat [Category:T%2C Aligned:77-257%2C Eval:1.7e-09%2C score:53.7],MGA_1	63.5	52.8	100.0	97.7	27.1	40.9	8.2e-87	3.8e-102	ACG	ATG	TAA	TAA	Wolbachia endosymbiont wVitB of Nasonia vitripennis phage WOVitB						unclassified Myoviridae	Caudoviricetes
GAGA-0028.Scaffold42.1475721-1478092	GAGA-0028	Myrmica rubra	Myrmicinae	Ankyrin repeat protein	Wolbachia	Rickettsiales	Alphaproteobacteria	Scaffold42	1475721-1478092	Scaffold42:1475721-1478092	1475721	1478092	2371	28	27	24	ankyrin_repeat_protein_x000D__x000D_ phosphocholine_transferase_AnkX	3	1476915	1476915	1478092	1478096	1177	1181	4	4	E9P653	COG:COG0666:ANKYR Ankyrin repeat [Category:T%2C Aligned:43-236%2C Eval:3.4e-20%2C score:86.0],COG:COG0666:ANKYR Ankyrin repeat [Category:T%2C Aligned:211-391%2C Eval:4.6e-09%2C score:53.7],MGA_3	TIGR:TIGR00870%3B trp: transient-receptor-potential calcium channel protein [Name:TIGR00870%2C Eval:2.9e-26%2C score:89.7%2C bias:11.5],COG:COG0666:ANKYR Ankyrin repeat [Category:T%2C Aligned:43-236%2C Eval:3.4e-20%2C score:86.0],COG:COG0666:ANKYR Ankyrin repeat [Category:T%2C Aligned:211-391%2C Eval:4.6e-09%2C score:53.7],MGA_3	52.8	52.8	98.2	97.7	40.9	40.9	3.8e-102	3.8e-102	ATA	ATG	TAA	TAA	Wolbachia endosymbiont wVitB of Nasonia vitripennis phage WOVitB						unclassified Myoviridae	Caudoviricetes
GAGA-0028.Scaffold42.1475721-1478092	GAGA-0028	Myrmica rubra	Myrmicinae	Ankyrin repeat protein	Wolbachia	Rickettsiales	Alphaproteobacteria	Scaffold42	1475721-1478092	Scaffold42:1475721-1478092	1475721	1478092	2371	28	27	24	ankyrin_repeat_protein_x000D__x000D_ phosphocholine_transferase_AnkX	3	1476583	1476583	1476831	1476831	248	248	0	0	E9P653			75.6	75.6	98.8	98.8	8.7	8.7	2.0e-26	2.0e-26	TTG	TTG	TGA	TGA	Wolbachia endosymbiont wVitB of Nasonia vitripennis phage WOVitB						unclassified Myoviridae	Caudoviricetes
GAGA-0028.Scaffold54.1099744-1103406	GAGA-0028	Myrmica rubra	Myrmicinae	Ankyrin repeat protein	Wolbachia	Rickettsiales	Alphaproteobacteria	Scaffold54	1099744-1103406	Scaffold54:1099744-1103406	1099744	1103406	3662	46	49	41	ankyrin repeat protein	1	1099744	1099706	1103406	1103410	3662	3704	715	719	E9P653	COG:COG0666:ANKYR Ankyrin repeat [Category:T%2C Aligned:867-1022%2C Eval:1.0e-19%2C score:86.8%2C N-term missing],COG:COG0666:ANKYR Ankyrin repeat [Category:T%2C Aligned:4-161%2C Eval:4.8e-18%2C score:81.8],COG:COG0666:ANKYR Ankyrin repeat [Category:T%2C Aligned:378-508%2C Eval:3.0e-17%2C score:79.5%2C N-term missing],COG:COG0666:ANKYR Ankyrin repeat [Category:T%2C Aligned:452-587%2C Eval:1.0e-16…		63.1	63.1	77.3	76.7	97.8	98.1			ATA	ATG	TAG	TAG	Wolbachia endosymbiont wVitB of Nasonia vitripennis phage WOVitB						unclassified Myoviridae	Caudoviricetes
GAGA-0028.Scaffold546.17406-18491	GAGA-0028	Myrmica rubra	Myrmicinae	Ankyrin repeat protein	Wolbachia	Rickettsiales	Alphaproteobacteria	Scaffold546	17406-18491	Scaffold546:17406-18491	17406	18491	1085	11	10	10	ankyrin repeat protein	1	17406	17393	18491	19387	1085	1994	1	11	E9P653	COG:COG0666:ANKYR Ankyrin repeat [Category:T%2C Aligned:2-161%2C Eval:9.7e-16%2C score:72.9],MGA_1	TIGR:TIGR00870%3B trp: transient-receptor-potential calcium channel protein [Name:TIGR00870%2C Eval:7.2e-08%2C score:28.9%2C bias:6.0],COG:COG0666:ANKYR Ankyrin repeat [Category:T%2C Aligned:2-161%2C Eval:9.7e-16%2C score:72.9],MGA_1	49.6	50.2	100.0	71.5	38.5	53.4	3.0e-87	8.5e-125	TGT	ATG	AGA	TGA	Wolbachia endosymbiont wVitB of Nasonia vitripennis phage WOVitB						unclassified Myoviridae	Caudoviricetes
GAGA-0028.Scaffold58.1072896-1074621	GAGA-0028	Myrmica rubra	Myrmicinae	Ankyrin 3 (Ankyrin repeat family protein)	Wolbachia	Rickettsiales	Alphaproteobacteria	Scaffold58	1072896-1074621	Scaffold58:1072896-1074621	1072896	1074621	1725	17	12	10	ankyrin repeat protein	2	1072896	1072891	1073220	1073220	324	329	212	212	Q4EBI3			56.3	55.8	100.0	99.1	19.3	19.4	2.3e-22	1.7e-22	TAC	ATG	TAA	TAA	Wolbachia endosymbiont of Drosophila ananassae						Wolbachia	Rickettsiales
GAGA-0028.Scaffold58.1072896-1074621	GAGA-0028	Myrmica rubra	Myrmicinae	Ankyrin repeat protein	Wolbachia	Rickettsiales	Alphaproteobacteria	Scaffold58	1072896-1074621	Scaffold58:1072896-1074621	1072896	1074621	1725	17	12	10	ankyrin repeat protein	2	1073290	1073290	1074600	1074600	1310	1310	655	655	E9P653	COG:COG0666:ANKYR Ankyrin repeat [Category:T%2C Aligned:107-238%2C Eval:1.1e-18%2C score:81.8%2C N-term missing],COG:COG0666:ANKYR Ankyrin repeat [Category:T%2C Aligned:6-140%2C Eval:2.2e-12%2C score:63.7%2C N-term missing],MGA_2	TIGR:TIGR00870%3B trp: transient-receptor-potential calcium channel protein [Name:TIGR00870%2C Eval:7.5e-19%2C score:65.2%2C bias:6.0],COG:COG0666:ANKYR Ankyrin repeat [Category:T%2C Aligned:107-238%2C Eval:1.1e-18%2C score:81.8%2C N-term missing],COG:COG0666:ANKYR Ankyrin repeat [Category:T%2C Aligned:6-140%2C Eval:2.2e-12%2C score:63.7%2C N-term missing],MGA_2	46.4	46.4	99.8	99.8	46.4	46.4	1.1e-97	1.1e-97	ATG	ATG	TAA	TAA	Wolbachia endosymbiont wVitB of Nasonia vitripennis phage WOVitB						unclassified Myoviridae	Caudoviricetes
GAGA-0028.Scaffold6.5471347-5476103	GAGA-0028	Myrmica rubra	Myrmicinae	Ankyrin repeat domain protein	Wolbachia	Rickettsiales	Alphaproteobacteria	Scaffold6	5471347-5476103	Scaffold6:5471347-5476103	5471347	5476103	4756	24	20	20	ankyrin repeat protein	3	5475703	5475703	5476103	5476134	400	431	0	0	B6Y9L2			78.9	79.1	100.0	93.7	2.8	2.8	8.8e-51	3.1e-51	ATG	ATG	CAT	TAG	Wolbachia endosymbiont of Culex quinquefasciatus JHB						Wolbachia	Rickettsiales
GAGA-0028.Scaffold6.5471347-5476103	GAGA-0028	Myrmica rubra	Myrmicinae	Ankyrin repeat domain protein	Wolbachia	Rickettsiales	Alphaproteobacteria	Scaffold6	5471347-5476103	Scaffold6:5471347-5476103	5471347	5476103	4756	24	20	20	ankyrin repeat protein	3	5471347	5470348	5475100	5475100	3753	4752	54	54	B6Y9L2	COG:COG0666:ANKYR Ankyrin repeat [Category:T%2C Aligned:959-1152%2C Eval:2.1e-19%2C score:86.0],COG:COG0666:ANKYR Ankyrin repeat [Category:T%2C Aligned:782-969%2C Eval:5.7e-19%2C score:84.9],COG:COG0666:ANKYR Ankyrin repeat [Category:T%2C Aligned:693-867%2C Eval:2.6e-12%2C score:65.2],MGA_1	TIGR:TIGR00870%3B trp: transient-receptor-potential calcium channel protein [Name:TIGR00870%2C Eval:2.3e-55%2C score:185.9%2C bias:28.4],COG:COG0666:ANKYR Ankyrin repeat [Category:T%2C Aligned:959-1152%2C Eval:2.1e-19%2C score:86.0],COG:COG0666:ANKYR Ankyrin repeat [Category:T%2C Aligned:782-969%2C Eval:5.7e-19%2C score:84.9],COG:COG0666:ANKYR Ankyrin repeat [Category:T%2C Aligned:693-867%2C Eval…	26.7	17.6	99.9	99.9	25.0	31.8	6.8e-310	0.0e+00	GAG	ACT	TAA	TAA	Wolbachia endosymbiont of Culex quinquefasciatus JHB						Wolbachia	Rickettsiales
GAGA-0028.Scaffold6.5471347-5476103	GAGA-0028	Myrmica rubra	Myrmicinae	Ankyrin repeat domain protein	Wolbachia	Rickettsiales	Alphaproteobacteria	Scaffold6	5471347-5476103	Scaffold6:5471347-5476103	5471347	5476103	4756	24	20	20	ankyrin repeat protein	3	5475333	5475333	5475647	5475647	314	314	0	0	M9WQI6			74.4	74.4	82.7	82.7	3.6	3.6	1.9e-29	1.9e-29	ATG	ATG	TAA	TAA	Wolbachia endosymbiont of Drosophila simulans wNo	GO:0043531	ADP binding [GO:0043531]		ADP binding [GO:0043531]		Wolbachia	Rickettsiales
GAGA-0028.Scaffold6.5488891-5497555	GAGA-0028	Myrmica rubra	Myrmicinae	Ankyrin repeat domain protein	Wolbachia	Rickettsiales	Alphaproteobacteria	Scaffold6	5488891-5497555	Scaffold6:5488891-5497555	5488891	5497555	8664	27	20	11	hypothetical protein	10	5491990	5491842	5492262	5492033	272	191	4	0	B6Y9L2			54.7		67.8		1.3		5.0e-09		ATG	ATG	TAA	TGA	Wolbachia endosymbiont of Culex quinquefasciatus JHB						Wolbachia	Rickettsiales
GAGA-0028.Scaffold6.5488891-5497555	GAGA-0028	Myrmica rubra	Myrmicinae	Ankyrin repeat domain protein	Wolbachia	Rickettsiales	Alphaproteobacteria	Scaffold6	5488891-5497555	Scaffold6:5488891-5497555	5488891	5497555	8664	27	20	11	hypothetical protein	10	5491449	5491094	5491622	5491258	173	164	0	0	B6Y9L2			57.6	60.9	98.2	83.3	1.2	1.0	6.1e-07	2.1e-07	TTG	TTG	TGA	TGA	Wolbachia endosymbiont of Culex quinquefasciatus JHB						Wolbachia	Rickettsiales
GAGA-0028.Scaffold6.5488891-5497555	GAGA-0028	Myrmica rubra	Myrmicinae	Ankyrin repeat domain protein	Wolbachia	Rickettsiales	Alphaproteobacteria	Scaffold6	5488891-5497555	Scaffold6:5488891-5497555	5488891	5497555	8664	27	20	11	hypothetical protein	10	5491094	5490922	5491258	5491125	164	203	0	0	B6Y9L2			60.9		83.3		1.0		2.1e-07		TTG	TTG	TGA	TAA	Wolbachia endosymbiont of Culex quinquefasciatus JHB						Wolbachia	Rickettsiales
GAGA-0028.Scaffold6.5488891-5497555	GAGA-0028	Myrmica rubra	Myrmicinae	Ankyrin repeat domain protein	Wolbachia	Rickettsiales	Alphaproteobacteria	Scaffold6	5488891-5497555	Scaffold6:5488891-5497555	5488891	5497555	8664	27	20	11	hypothetical protein	10	5495613	5495298	5496551	5495459	938	161	1	7	B6Y9L2	COG:COG0666:ANKYR Ankyrin repeat [Category:T%2C Aligned:30-238%2C Eval:7.7e-11%2C score:58.3],MGA_8		48.2		95.2		5.9		1.4e-58		TTG	ATG	TAA	TAG	Wolbachia endosymbiont of Culex quinquefasciatus JHB						Wolbachia	Rickettsiales
GAGA-0028.Scaffold6.5488891-5497555	GAGA-0028	Myrmica rubra	Myrmicinae	Ankyrin repeat domain protein	Wolbachia	Rickettsiales	Alphaproteobacteria	Scaffold6	5488891-5497555	Scaffold6:5488891-5497555	5488891	5497555	8664	27	20	11	hypothetical protein	10	5497154	5497154	5497555	5497585	401	431	3	3	B6Y9L2			79.1	79.1	100.0	93.7	2.8	2.8	3.0e-51	3.1e-51	ATG	ATG	ATT	TAG	Wolbachia endosymbiont of Culex quinquefasciatus JHB						Wolbachia	Rickettsiales
GAGA-0028.Scaffold6.5488891-5497555	GAGA-0028	Myrmica rubra	Myrmicinae	Ankyrin repeat domain protein	Wolbachia	Rickettsiales	Alphaproteobacteria	Scaffold6	5488891-5497555	Scaffold6:5488891-5497555	5488891	5497555	8664	27	20	11	hypothetical protein	10	5496784	5495613	5497098	5496551	314	938	0	1	M9WQI6			74.4	48.2	82.7	95.2	3.6	5.9	1.9e-29	1.4e-58	ATG	TTG	TAA	TAA	Wolbachia endosymbiont of Drosophila simulans wNo	GO:0043531	ADP binding [GO:0043531]		ADP binding [GO:0043531]		Wolbachia	Rickettsiales
GAGA-0028.Scaffold6.5488891-5497555	GAGA-0028	Myrmica rubra	Myrmicinae	Uncharacterized protein	Wolbachia	Rickettsiales	Alphaproteobacteria	Scaffold6	5488891-5497555	Scaffold6:5488891-5497555	5488891	5497555	8664	27	20	11	hypothetical protein	10	5488891	5496784	5490962	5497098	2071	314	0	0	A0A218KPB3	COG:COG5635 Predicted NTPase%2C NACHT family domain [Category:T%2C Aligned:322-625%2C Eval:1.6e-12%2C score:67.9%2C C-term missing],MGA_1		57.9	74.4	92.0	82.7	16.2	3.6	1.1e-194	1.9e-29	AAA	ATG	TAA	TAA	Wolbachia endosymbiont of Folsomia candida						Wolbachia	Rickettsiales
GAGA-0028.Scaffold6.5488891-5497555	GAGA-0028	Myrmica rubra	Myrmicinae		Wolbachia	Rickettsiales	Alphaproteobacteria	Scaffold6	5488891-5497555	Scaffold6:5488891-5497555	5488891	5497555	8664	27	20	11	hypothetical protein	10	5491842	5491449	5492033	5491622	191	173	0	0					57.6		98.2		1.2		6.1e-07	ATG	TTG	TGA	TGA
GAGA-0028.Scaffold6.5488891-5497555	GAGA-0028	Myrmica rubra	Myrmicinae		Wolbachia	Rickettsiales	Alphaproteobacteria	Scaffold6	5488891-5497555	Scaffold6:5488891-5497555	5488891	5497555	8664	27	20	11	hypothetical protein	10	5495298	5491990	5495459	5492262	161	272	7	4					54.7		67.8		1.3		5.0e-09	ATG	ATG	TAG	TAA
GAGA-0028.Scaffold6.5488891-5497555	GAGA-0028	Myrmica rubra	Myrmicinae		Wolbachia	Rickettsiales	Alphaproteobacteria	Scaffold6	5488891-5497555	Scaffold6:5488891-5497555	5488891	5497555	8664	27	20	11	hypothetical protein	10	5490922	5488452	5491125	5490962	203	2510	0	9					56.8		92.8		19.5		1.3e-229	TTG	TTG	TAA	TAA
GAGA-0028.Scaffold61.846268-850012	GAGA-0028	Myrmica rubra	Myrmicinae	DNA repair protein RadC	Wolbachia	Rickettsiales	Alphaproteobacteria	Scaffold61	846268-850012	Scaffold61:846268-850012	846268	850012	3744	24	21	20	protein Vapar	6	848330	848330	848836	848836	506	506	0	0	A0A6M5E574		TIGR:TIGR00608%3B radc: DNA repair protein RadC [Name:TIGR00608%2C Eval:2.1e-16%2C score:58.3%2C bias:0.1],Domain:cl26989:RadC DNA repair protein RadC%2C contains a helix-hairpin-helix DNA-binding motif [Replication%2C recombination and repair]. The genes in this family for which the functions are known have an as yet porrly defined role in determining sensitivity to DNA damaging agents such as U…	96.8	96.8	92.9	92.9	70.3	70.3	1.9e-77	1.9e-77	ATG	ATG	TAA	TAA	Wolbachia endosymbiont of Diaphorina citri	GO:0008237; GO:0046872	metal ion binding [GO:0046872]; metallopeptidase activity [GO:0008237]		metal ion binding [GO:0046872]; metallopeptidase activity [GO:0008237]		Wolbachia	Rickettsiales
GAGA-0028.Scaffold61.846268-850012	GAGA-0028	Myrmica rubra	Myrmicinae	Helix-turn-helix transcriptional regulator	Wolbachia	Rickettsiales	Alphaproteobacteria	Scaffold61	846268-850012	Scaffold61:846268-850012	846268	850012	3744	24	21	20	protein Vapar	6	847276	847276	848130	848130	854	854	5	5	A0A7G5CAE0			86.6	86.6	100.0	100.0	93.0	93.0			TTG	TTG	TAA	TAA	Wolbachia pipientis	GO:0003677	DNA binding [GO:0003677]		DNA binding [GO:0003677]		Wolbachia	Rickettsiales
GAGA-0028.Scaffold61.846268-850012	GAGA-0028	Myrmica rubra	Myrmicinae	ISSod10, transposase OrfA, putative (Winged helix-turn helix family protein)	Wolbachia	Rickettsiales	Alphaproteobacteria	Scaffold61	846268-850012	Scaffold61:846268-850012	846268	850012	3744	24	21	20	protein Vapar	6	848881	848881	849342	849342	461	461	2	2	Q4EAU6	COG:COG3415 Transposase [Category:X%2C Aligned:42-139%2C Eval:3.6e-12%2C score:57.4],MGA_4		94.2	94.2	90.8	90.8	85.8	85.8			ATG	ATG	TAA	TAA	Wolbachia endosymbiont of Drosophila ananassae						Wolbachia	Rickettsiales
GAGA-0028.Scaffold61.846268-850012	GAGA-0028	Myrmica rubra	Myrmicinae	Terminase, large subunit (DNA-packaging protein) (Large terminase protein) [Includes: Endonuclease (EC 3.1.21.4); Helicase (EC 3.6.4.12); ATPase (EC 3.6.4.-)]	Wolbachia	Rickettsiales	Alphaproteobacteria	Scaffold61	846268-850012	Scaffold61:846268-850012	846268	850012	3744	24	21	20	protein Vapar	6	849714	849714	850012	850025	298	311	19	20	Q9JMM7			88.0	88.0	93.9	89.3	15.1	15.1	1.9e-40	1.8e-40	AAG	GTG	TAA	TAA	Wolbachia phage WO	GO:0003678; GO:0005524; GO:0009036; GO:0019073; GO:0030430; GO:0046872; GO:0098009; GO:0140603	host cell cytoplasm [GO:0030430]; viral terminase, large subunit [GO:0098009]; ATP binding [GO:0005524]; ATP hydrolysis activity [GO:0140603]; DNA helicase activity [GO:0003678]; metal ion binding [GO:0046872]; type II site-specific deoxyribonuclease activity [GO:0009036]; viral DNA genome packaging [GO:0019073]	viral DNA genome packaging [GO:0019073]	ATP binding [GO:0005524]; ATP hydrolysis activity [GO:0140603]; DNA helicase activity [GO:0003678]; metal ion binding [GO:0046872]; type II site-specific deoxyribonuclease activity [GO:0009036]	host cell cytoplasm [GO:0030430]; viral terminase, large subunit [GO:0098009]	unclassified Myoviridae	Caudoviricetes
GAGA-0028.Scaffold61.846268-850012	GAGA-0028	Myrmica rubra	Myrmicinae	Transposase	Wolbachia	Rickettsiales	Alphaproteobacteria	Scaffold61	846268-850012	Scaffold61:846268-850012	846268	850012	3744	24	21	20	protein Vapar	6	846268	846255	847124	847124	856	869	12	12	A0A178GX68			85.5	85.2	100.0	99.0	99.3	99.7			ATG	ATG	TAA	TAA	Wolbachia endosymbiont of Dactylopius coccus						Wolbachia	Rickettsiales
GAGA-0028.Scaffold61.846268-850012	GAGA-0028	Myrmica rubra	Myrmicinae	Uncharacterized protein	Wolbachia	Rickettsiales	Alphaproteobacteria	Scaffold61	846268-850012	Scaffold61:846268-850012	846268	850012	3744	24	21	20	protein Vapar	6	849569	849569	849721	849721	152	152	15	15	A0A3T0GHM4			100.0	100.0	66.0	66.0	42.9	42.9	1.3e-09	1.3e-09	ATG	ATG	TAA	TAA	Wolbachia endosymbiont of Bemisia tabaci	GO:0019058	viral life cycle [GO:0019058]	viral life cycle [GO:0019058]			Wolbachia	Rickettsiales
GAGA-0028.Scaffold61.852812-855906	GAGA-0028	Myrmica rubra	Myrmicinae	DNA repair protein RadC	Wolbachia	Rickettsiales	Alphaproteobacteria	Scaffold61	852812-855906	Scaffold61:852812-855906	852812	855906	3094	23	16	12	UPF0758 protein VC0395_A2597	7	853336	853336	853539	853539	203	203	0	0	A0A6M5E574			94.5	94.5	82.1	82.1	24.8	24.8	2.3e-19	2.3e-19	ATG	ATG	TAA	TAA	Wolbachia endosymbiont of Diaphorina citri	GO:0008237; GO:0046872	metal ion binding [GO:0046872]; metallopeptidase activity [GO:0008237]		metal ion binding [GO:0046872]; metallopeptidase activity [GO:0008237]		Wolbachia	Rickettsiales
GAGA-0028.Scaffold61.852812-855906	GAGA-0028	Myrmica rubra	Myrmicinae	DNA repair protein RadC	Wolbachia	Rickettsiales	Alphaproteobacteria	Scaffold61	852812-855906	Scaffold61:852812-855906	852812	855906	3094	23	16	12	UPF0758 protein VC0395_A2597	7	853566	853566	853838	853838	272	272	0	0	A0A6M5E574			95.3	95.3	94.4	94.4	38.3	38.3	3.3e-37	3.3e-37	ATG	ATG	TAA	TAA	Wolbachia endosymbiont of Diaphorina citri	GO:0008237; GO:0046872	metal ion binding [GO:0046872]; metallopeptidase activity [GO:0008237]		metal ion binding [GO:0046872]; metallopeptidase activity [GO:0008237]		Wolbachia	Rickettsiales
GAGA-0028.Scaffold61.852812-855906	GAGA-0028	Myrmica rubra	Myrmicinae	Helix-turn-helix transcriptional regulator	Wolbachia	Rickettsiales	Alphaproteobacteria	Scaffold61	852812-855906	Scaffold61:852812-855906	852812	855906	3094	23	16	12	UPF0758 protein VC0395_A2597	7	854577	854577	854888	854888	311	311	0	0	A0A7G5CAE0			82.4	82.4	99.0	99.0	33.8	33.8	8.8e-43	8.8e-43	TTG	TTG	TAA	TAA	Wolbachia pipientis	GO:0003677	DNA binding [GO:0003677]		DNA binding [GO:0003677]		Wolbachia	Rickettsiales
GAGA-0028.Scaffold61.852812-855906	GAGA-0028	Myrmica rubra	Myrmicinae	Helix-turn-helix transcriptional regulator	Wolbachia	Rickettsiales	Alphaproteobacteria	Scaffold61	852812-855906	Scaffold61:852812-855906	852812	855906	3094	23	16	12	UPF0758 protein VC0395_A2597	7	854038	854038	854400	854400	362	362	0	0	A0A7G5CAE0			83.7	83.7	100.0	100.0	39.7	39.7	9.1e-48	9.1e-48	TTG	TTG	TAA	TAA	Wolbachia pipientis	GO:0003677	DNA binding [GO:0003677]		DNA binding [GO:0003677]		Wolbachia	Rickettsiales
GAGA-0028.Scaffold61.852812-855906	GAGA-0028	Myrmica rubra	Myrmicinae	ISSod10, transposase OrfA, putative (Winged helix-turn helix family protein)	Wolbachia	Rickettsiales	Alphaproteobacteria	Scaffold61	852812-855906	Scaffold61:852812-855906	852812	855906	3094	23	16	12	UPF0758 protein VC0395_A2597	7	852830	852830	853291	853291	461	461	2	2	Q4EAU6	COG:COG3415 Transposase [Category:X%2C Aligned:42-139%2C Eval:2.2e-12%2C score:57.8],MGA_1		93.5	93.5	90.8	90.8	85.8	85.8			ATG	ATG	TAA	TAA	Wolbachia endosymbiont of Drosophila ananassae						Wolbachia	Rickettsiales
GAGA-0028.Scaffold61.852812-855906	GAGA-0028	Myrmica rubra	Myrmicinae	Transposase	Wolbachia	Rickettsiales	Alphaproteobacteria	Scaffold61	852812-855906	Scaffold61:852812-855906	852812	855906	3094	23	16	12	UPF0758 protein VC0395_A2597	7	855520	855520	855906	855918	386	398	0	0	A0A178GX68			33.6	33.6	84.5	82.6	95.0	95.0			TTG	TTG	AAG	TAA	Wolbachia endosymbiont of Dactylopius coccus						Wolbachia	Rickettsiales
GAGA-0028.Scaffold61.852812-855906	GAGA-0028	Myrmica rubra	Myrmicinae	Uncharacterized protein	Wolbachia	Rickettsiales	Alphaproteobacteria	Scaffold61	852812-855906	Scaffold61:852812-855906	852812	855906	3094	23	16	12	UPF0758 protein VC0395_A2597	7	855288	855288	855578	855578	290	290	0	0	B6Y9U6		TIGR:TIGR01784%3B T_den_put_tspse: conserved hypothetical protein [Name:TIGR01784%2C Eval:2.2e-13%2C score:48.6%2C bias:1.7],MGA_6	95.7	95.7	95.8	95.8	27.0	27.0	1.0e-43	1.0e-43	ATG	ATG	TGA	TGA	Wolbachia endosymbiont of Culex quinquefasciatus JHB						Wolbachia	Rickettsiales
GAGA-0028.Scaffold778.28379-30773	GAGA-0028	Myrmica rubra	Myrmicinae	Ankyrin repeat protein	Wolbachia	Rickettsiales	Alphaproteobacteria	Scaffold778	28379-30773	Scaffold778:28379-30773	28379	30773	2394	20	20	13	ankyrin repeat protein	1	28379	28366	30773	30777	2394	2411	1530	1530	E9P653	COG:COG0666:ANKYR Ankyrin repeat [Category:T%2C Aligned:415-589%2C Eval:5.2e-22%2C score:93.0],COG:COG0666:ANKYR Ankyrin repeat [Category:T%2C Aligned:43-236%2C Eval:2.4e-19%2C score:85.3],COG:COG0666:ANKYR Ankyrin repeat [Category:T%2C Aligned:196-392%2C Eval:3.8e-10%2C score:57.9%2C N-term missing],MGA_1		52.8	52.7	96.0	95.4	85.5	85.6			ATA	ATG	AGA	TGA	Wolbachia endosymbiont wVitB of Nasonia vitripennis phage WOVitB						unclassified Myoviridae	Caudoviricetes
GAGA-0028.Scaffold84.1125903-1128713	GAGA-0028	Myrmica rubra	Myrmicinae	Ankyrin 3 (Ankyrin repeat family protein)	Wolbachia	Rickettsiales	Alphaproteobacteria	Scaffold84	1125903-1128713	Scaffold84:1125903-1128713	1125903	1128713	2810	15	19	10	ankyrin repeat protein	2	1125903	1125898	1126452	1126452	549	554	278	278	Q4EBI3	COG:COG0666:ANKYR Ankyrin repeat [Category:T%2C Aligned:4-160%2C Eval:3.0e-20%2C score:81.8],MGA_1	TIGR:TIGR00870%3B trp: transient-receptor-potential calcium channel protein [Name:TIGR00870%2C Eval:1.2e-15%2C score:54.6%2C bias:2.3],COG:COG0666:ANKYR Ankyrin repeat [Category:T%2C Aligned:4-160%2C Eval:3.0e-20%2C score:81.8],MGA_1	76.6	76.2	100.0	99.5	29.8	30.0	2.4e-72	1.8e-72	TAC	ATG	TAA	TAA	Wolbachia endosymbiont of Drosophila ananassae						Wolbachia	Rickettsiales
GAGA-0028.Scaffold84.1125903-1128713	GAGA-0028	Myrmica rubra	Myrmicinae	Ankyrin repeat protein	Wolbachia	Rickettsiales	Alphaproteobacteria	Scaffold84	1125903-1128713	Scaffold84:1125903-1128713	1125903	1128713	2810	15	19	10	ankyrin repeat protein	2	1126465	1126465	1128713	1128750	2248	2285	950	970	E9P653	COG:COG0666:ANKYR Ankyrin repeat [Category:T%2C Aligned:395-524%2C Eval:1.3e-18%2C score:82.9%2C N-term missing],COG:COG0666:ANKYR Ankyrin repeat [Category:T%2C Aligned:1-155%2C Eval:2.7e-13%2C score:67.2%2C N-term missing],COG:COG0666:ANKYR Ankyrin repeat [Category:T%2C Aligned:217-429%2C Eval:2.7e-12%2C score:64.5],MGA_2		68.5	68.4	100.0	98.8	78.1	78.4			TTG	TTG	AGC	TAG	Wolbachia endosymbiont wVitB of Nasonia vitripennis phage WOVitB						unclassified Myoviridae	Caudoviricetes
GAGA-0028.Scaffold9.5062430-5065214	GAGA-0028	Myrmica rubra	Myrmicinae	Ankyrin 3 (Ankyrin repeat family protein)	Wolbachia	Rickettsiales	Alphaproteobacteria	Scaffold9	5062430-5065214	Scaffold9:5062430-5065214	5062430	5065214	2784	21	21	12	ankyrin repeat protein	2	5062430	5062425	5063066	5063066	636	641	86	86	Q4EBI3	COG:COG0666:ANKYR Ankyrin repeat [Category:T%2C Aligned:4-160%2C Eval:1.5e-20%2C score:83.3],MGA_1	TIGR:TIGR00870%3B trp: transient-receptor-potential calcium channel protein [Name:TIGR00870%2C Eval:7.7e-22%2C score:75.1%2C bias:3.3],COG:COG0666:ANKYR Ankyrin repeat [Category:T%2C Aligned:4-160%2C Eval:1.5e-20%2C score:83.3],MGA_1	74.1	73.8	94.3	93.9	32.6	32.7	9.8e-78	7.7e-78	TAC	ATG	TGA	TGA	Wolbachia endosymbiont of Drosophila ananassae						Wolbachia	Rickettsiales
GAGA-0028.Scaffold9.5062430-5065214	GAGA-0028	Myrmica rubra	Myrmicinae	Ankyrin repeat protein	Wolbachia	Rickettsiales	Alphaproteobacteria	Scaffold9	5062430-5065214	Scaffold9:5062430-5065214	5062430	5065214	2784	21	21	12	ankyrin repeat protein	2	5063014	5063014	5065214	5065251	2200	2237	575	592	E9P653	COG:COG0666:ANKYR Ankyrin repeat [Category:T%2C Aligned:398-506%2C Eval:1.8e-15%2C score:73.7%2C N-term missing],COG:COG0666:ANKYR Ankyrin repeat [Category:T%2C Aligned:65-230%2C Eval:5.1e-13%2C score:66.4%2C N-term missing],MGA_2		64.8	64.7	99.6	98.4	77.1	77.4			ATG	ATG	AGC	TAG	Wolbachia endosymbiont wVitB of Nasonia vitripennis phage WOVitB						unclassified Myoviridae	Caudoviricetes
GAGA-0063.Scaffold16.7170525-7171201	GAGA-0063	Neoponera goeldii	Ponerinae	Tetratricopeptide repeat protein	Wolbachia	Rickettsiales	Alphaproteobacteria	Scaffold16	7170525-7171201	Scaffold16:7170525-7171201	7170525	7171201	676	28	26	24	ankyrin repeat protein	1	7170551	7170551	7171201	7172201					A0A4Y6UMV0	COG:COG0666:ANKYR Ankyrin repeat [Category:T%2C Aligned:9-142%2C Eval:2.8e-12%2C score:61.0%2C N-term missing],MGA_1		65.2	41.2	100.0	100.0	11.2	26.8	2.0e-73	2.9e-104	TTA	TTT	TAA	TAA	Wolbachia endosymbiont of Carposina sasakii						Wolbachia	Rickettsiales
GAGA-0063.Scaffold213.46449-47449	GAGA-0063	Neoponera goeldii	Ponerinae	Ankyrin repeat domain protein	Wolbachia	Rickettsiales	Alphaproteobacteria	Scaffold213	46449-47449	Scaffold213:46449-47449	46449	47449	1000	15	15	14	ankyrin repeat protein	1	46809	46809	47449	48449					C0R3E9	COG:COG0666:ANKYR Ankyrin repeat [Category:T%2C Aligned:19-179%2C Eval:2.0e-10%2C score:55.6%2C N-term missing],MGA_1	TIGR:TIGR00870%3B trp: transient-receptor-potential calcium channel protein [Name:TIGR00870%2C Eval:1.8e-07%2C score:27.5%2C bias:7.2],COG:COG0666:ANKYR Ankyrin repeat [Category:T%2C Aligned:19-179%2C Eval:2.0e-10%2C score:55.6%2C N-term missing],MGA_1	65.7	45.3	96.2	94.5	8.2	21.5	1.3e-69	5.4e-119	TAA	ATG	TAG	TAG	Wolbachia sp. subsp. Drosophila simulans (strain wRi)						Wolbachia	Rickettsiales
GAGA-0080.Scaffold7.277737-279231	GAGA-0080	Pheidole pallidula	Myrmicinae	Flavin-dependent thymidylate synthase (FDTS) (EC 2.1.1.148) (FAD-dependent thymidylate synthase) (Thymidylate synthase ThyX) (TS) (TSase)	Wolbachia	Rickettsiales	Alphaproteobacteria	Scaffold7	277737-279231	Scaffold7:277737-279231	277737	279231	1494	53	55	49	Flavin-dependent_thymidilate_synthase_x000D__x000D_ UDP-N-acetylglucosamine_1-carboxyvinyltransferase	2	277737	277855	277845	279141	108	1286	157	395	A0A218KN31			80.6	82.5	100.0	98.6	12.5	92.4	4.2e-08		ATG	ATG	ATT	TGA	Wolbachia endosymbiont of Folsomia candida	GO:0006231; GO:0006235; GO:0032259; GO:0050660; GO:0050797	flavin adenine dinucleotide binding [GO:0050660]; thymidylate synthase (FAD) activity [GO:0050797]; dTMP biosynthetic process [GO:0006231]; dTTP biosynthetic process [GO:0006235]; methylation [GO:0032259]	dTMP biosynthetic process [GO:0006231]; dTTP biosynthetic process [GO:0006235]; methylation [GO:0032259]	flavin adenine dinucleotide binding [GO:0050660]; thymidylate synthase (FAD) activity [GO:0050797]		Wolbachia	Rickettsiales
GAGA-0080.Scaffold7.277737-279231	GAGA-0080	Pheidole pallidula	Myrmicinae	UDP-N-acetylglucosamine 1-carboxyvinyltransferase (EC 2.5.1.7) (Enoylpyruvate transferase) (UDP-N-acetylglucosamine enolpyruvyl transferase) (EPT)	Wolbachia	Rickettsiales	Alphaproteobacteria	Scaffold7	277737-279231	Scaffold7:277737-279231	277737	279231	1494	53	55	49	Flavin-dependent_thymidilate_synthase_x000D__x000D_ UDP-N-acetylglucosamine_1-carboxyvinyltransferase	2	277855	277855	279228	279141	1373	1286	330	395	A0A060Q018	COG:COG0766:MurA UDP-N-acetylglucosamine enolpyruvyl transferase [Category:M%2C Aligned:1-457%2C Eval:0.0e+00%2C score:518.2],MGA_2		80.8	82.5	100.0	98.6	100.0	92.4			ATG	ATG	TGA	TGA	Wolbachia endosymbiont of Cimex lectularius	GO:0005737; GO:0007049; GO:0008360; GO:0008760; GO:0009252; GO:0019277; GO:0051301; GO:0071555	cytoplasm [GO:0005737]; UDP-N-acetylglucosamine 1-carboxyvinyltransferase activity [GO:0008760]; cell cycle [GO:0007049]; cell division [GO:0051301]; cell wall organization [GO:0071555]; peptidoglycan biosynthetic process [GO:0009252]; regulation of cell shape [GO:0008360]; UDP-N-acetylgalactosamine biosynthetic process [GO:0019277]	cell cycle [GO:0007049]; cell division [GO:0051301]; cell wall organization [GO:0071555]; peptidoglycan biosynthetic process [GO:0009252]; regulation of cell shape [GO:0008360]; UDP-N-acetylgalactosamine biosynthetic process [GO:0019277]	UDP-N-acetylglucosamine 1-carboxyvinyltransferase activity [GO:0008760]	cytoplasm [GO:0005737]	Wolbachia	Rickettsiales
GAGA-0080.Scaffold7.285141-285763	GAGA-0080	Pheidole pallidula	Myrmicinae	3-oxoacyl-[acyl-carrier-protein] synthase 2 (EC 2.3.1.179)	Wolbachia	Rickettsiales	Alphaproteobacteria	Scaffold7	285141-285763	Scaffold7:285141-285763	285141	285763	622	36	34	34	3-oxoacyl-synthase-2	1	285212	285212	285763	285769	551	557	22	22	Q5GRP7	COG:COG0304:FabB 3-oxoacyl-(acyl-carrier-protein) synthase [Category:IQ%2C Aligned:3-183%2C Eval:3.3e-89%2C score:264.5%2C N-term missing],MGA_1	TIGR:TIGR03150%3B fabF: beta-ketoacyl-acyl-carrier-protein synthase II [Name:TIGR03150%2C Eval:4.3e-82%2C score:273.9%2C bias:0.3],COG:COG0304:FabB 3-oxoacyl-(acyl-carrier-protein) synthase [Category:IQ%2C Aligned:3-183%2C Eval:3.3e-89%2C score:264.5%2C N-term missing],MGA_1									TGG	ATG	TAA	TAA	Wolbachia sp. subsp. Brugia malayi (strain TRS)	GO:0004315; GO:0006633; GO:0033817	3-oxoacyl-[acyl-carrier-protein] synthase activity [GO:0004315]; beta-ketoacyl-acyl-carrier-protein synthase II activity [GO:0033817]; fatty acid biosynthetic process [GO:0006633]	fatty acid biosynthetic process [GO:0006633]	3-oxoacyl-[acyl-carrier-protein] synthase activity [GO:0004315]; beta-ketoacyl-acyl-carrier-protein synthase II activity [GO:0033817]		Wolbachia	Rickettsiales
GAGA-0082.Scaffold4.12809954-12810948	GAGA-0082	Pristomyrmex punctatus	Myrmicinae	RNA polymerase sigma factor RpoD (Sigma-70)	Wolbachia	Rickettsiales	Alphaproteobacteria	Scaffold4	12809954-12810948	Scaffold4:12809954-12810948	12809954	12810948	994	23	22	22	RNA_polymerase_sigma_factor_RpoD	1	12810215	12810215	12810523	12810523	308	308	0	0	A0A060PZL0		TIGR:TIGR02393%3B RpoD_Cterm: RNA polymerase sigma factor RpoD [Name:TIGR02393%2C Eval:4.8e-14%2C score:50.5%2C bias:0.1],Domain:cl27146:Sigma70_r3 Sigma-70 region 3. This family includes a number of closely related sigma-70 (TIGR02937) factors in the cyanobacteria. All appear most closely related to the essential sigma-70 factor RpoD%2C and some score above trusted to the RpoD C-terminal domain …	77.1	77.1	79.4	79.4	12.8	12.8	7.0e-24	7.0e-24	ATG	ATG	TAA	TAA	Wolbachia endosymbiont of Cimex lectularius	GO:0001123; GO:0003677; GO:0005737; GO:0016987	cytoplasm [GO:0005737]; DNA binding [GO:0003677]; sigma factor activity [GO:0016987]; transcription initiation from bacterial-type RNA polymerase promoter [GO:0001123]	transcription initiation from bacterial-type RNA polymerase promoter [GO:0001123]	DNA binding [GO:0003677]; sigma factor activity [GO:0016987]	cytoplasm [GO:0005737]	Wolbachia	Rickettsiales
GAGA-0085.Scaffold5.1024757-1024905	GAGA-0085	Tetramorium caespitum	Myrmicinae		Wolbachia	Rickettsiales	Alphaproteobacteria	Scaffold5	1024757-1024905	Scaffold5:1024757-1024905	1024757	1024905	148	85	85	85	hypothetical protein	1	1024806	1024806	1024905	1024905																TGA		TAA
GAGA-0087.Scaffold1.10059409-10062223	GAGA-0087	Myrmica scabrinodis	Myrmicinae	Ankyrin repeat protein	Wolbachia	Rickettsiales	Alphaproteobacteria	Scaffold1	10059409-10062223	Scaffold1:10059409-10062223	10059409	10062223	2814	49	42	36	ankyrin repeat protein	1	10059409	10059404	10062223	10062235	2814	2831	621	621	E9P653	COG:COG0666:ANKYR Ankyrin repeat [Category:T%2C Aligned:34-274%2C Eval:3.3e-17%2C score:79.1],COG:COG0666:ANKYR Ankyrin repeat [Category:T%2C Aligned:570-736%2C Eval:6.1e-17%2C score:78.3],COG:COG0666:ANKYR Ankyrin repeat [Category:T%2C Aligned:368-536%2C Eval:6.9e-14%2C score:69.5],COG:COG0666:ANKYR Ankyrin repeat [Category:T%2C Aligned:196-369%2C Eval:1.5e-11%2C score:62.5%2C N-term missing],MG…		22.8	47.5	99.3	99.6	88.4	96.4			TAC	ATG	GAA	TGA	Wolbachia endosymbiont wVitB of Nasonia vitripennis phage WOVitB						unclassified Myoviridae	Caudoviricetes
GAGA-0087.Scaffold1.10066041-10068042	GAGA-0087	Myrmica scabrinodis	Myrmicinae	Ankyrin repeat protein	Wolbachia	Rickettsiales	Alphaproteobacteria	Scaffold1	10066041-10068042	Scaffold1:10066041-10068042	10066041	10068042	2001	23	22	20	ankyrin repeat protein	1	10066041	10065665	10068042	10068055	2001	2390	421	474	E9P653	COG:COG0666:ANKYR Ankyrin repeat [Category:T%2C Aligned:312-451%2C Eval:2.9e-19%2C score:84.5%2C N-term missing],COG:COG0666:ANKYR Ankyrin repeat [Category:T%2C Aligned:3-150%2C Eval:1.2e-15%2C score:74.1%2C N-term missing],MGA_1		53.6	50.3	100.0	99.1	77.4	90.8			CTA	ATG	AGC	TAA	Wolbachia endosymbiont wVitB of Nasonia vitripennis phage WOVitB						unclassified Myoviridae	Caudoviricetes
GAGA-0087.Scaffold1.10098587-10101429	GAGA-0087	Myrmica scabrinodis	Myrmicinae	Ankyrin repeat protein	Wolbachia	Rickettsiales	Alphaproteobacteria	Scaffold1	10098587-10101429	Scaffold1:10098587-10101429	10098587	10101429	2842	9	14	8	ankyrin repeat protein	1	10098587	10098576	10101429	10101974	2842	3398	376	410	E9P653	COG:COG0666:ANKYR Ankyrin repeat [Category:T%2C Aligned:29-200%2C Eval:7.8e-20%2C score:86.8],COG:COG0666:ANKYR Ankyrin repeat [Category:T%2C Aligned:146-359%2C Eval:8.0e-18%2C score:81.0],COG:COG0666:ANKYR Ankyrin repeat [Category:T%2C Aligned:779-923%2C Eval:1.7e-17%2C score:79.9%2C N-term missing],COG:COG0666:ANKYR Ankyrin repeat [Category:T%2C Aligned:365-552%2C Eval:2.9e-10%2C score:58.7],CO…	TIGR:TIGR00870%3B trp: transient-receptor-potential calcium channel protein [Name:TIGR00870%2C Eval:8.9e-51%2C score:170.7%2C bias:21.5],COG:COG0666:ANKYR Ankyrin repeat [Category:T%2C Aligned:29-200%2C Eval:7.8e-20%2C score:86.8],COG:COG0666:ANKYR Ankyrin repeat [Category:T%2C Aligned:146-359%2C Eval:8.0e-18%2C score:81.0],COG:COG0666:ANKYR Ankyrin repeat [Category:T%2C Aligned:779-923%2C Eval:1…	59.8	59.7	74.4	62.4	75.3	75.4	1.6e-231	1.5e-231	TAC	ATG	ATT	TAA	Wolbachia endosymbiont wVitB of Nasonia vitripennis phage WOVitB						unclassified Myoviridae	Caudoviricetes
GAGA-0087.Scaffold1.10339609-10343286	GAGA-0087	Myrmica scabrinodis	Myrmicinae	Ankyrin repeat protein	Wolbachia	Rickettsiales	Alphaproteobacteria	Scaffold1	10339609-10343286	Scaffold1:10339609-10343286	10339609	10343286	3677	34	25	23	ankyrin repeat protein	1	10339609	10339604	10343286	10343356	3677	3752	318	337	E9P653	COG:COG0666:ANKYR Ankyrin repeat [Category:T%2C Aligned:881-1009%2C Eval:4.8e-21%2C score:90.7%2C N-term missing],COG:COG0666:ANKYR Ankyrin repeat [Category:T%2C Aligned:1-160%2C Eval:1.3e-18%2C score:83.7],COG:COG0666:ANKYR Ankyrin repeat [Category:T%2C Aligned:382-580%2C Eval:7.0e-18%2C score:81.4],COG:COG0666:ANKYR Ankyrin repeat [Category:T%2C Aligned:172-387%2C Eval:2.3e-17%2C score:79.9],CO…		44.2	44.1	80.6	79.2	94.6	94.9			TAC	ATG	AGC	TAA	Wolbachia endosymbiont wVitB of Nasonia vitripennis phage WOVitB						unclassified Myoviridae	Caudoviricetes
GAGA-0087.Scaffold1.3575968-3579556	GAGA-0087	Myrmica scabrinodis	Myrmicinae	Ankyrin repeat protein	Wolbachia	Rickettsiales	Alphaproteobacteria	Scaffold1	3575968-3579556	Scaffold1:3575968-3579556	3575968	3579556	3588	24	25	24	ankyrin repeat protein	1	3575988	3575988	3579556	3579560	3568	3572	52	52	E9P653	COG:COG0666:ANKYR Ankyrin repeat [Category:T%2C Aligned:862-992%2C Eval:1.4e-15%2C score:74.9%2C N-term missing],COG:COG0666:ANKYR Ankyrin repeat [Category:T%2C Aligned:771-900%2C Eval:1.9e-15%2C score:74.5%2C N-term missing],COG:COG0666:ANKYR Ankyrin repeat [Category:T%2C Aligned:300-468%2C Eval:4.6e-13%2C score:67.2%2C N-term missing],COG:COG0666:ANKYR Ankyrin repeat [Category:T%2C Aligned:526-…		44.8	44.8	78.0	77.9	96.5	96.5			ATA	ATG	TAA	TAA	Wolbachia endosymbiont wVitB of Nasonia vitripennis phage WOVitB						unclassified Myoviridae	Caudoviricetes
GAGA-0087.Scaffold1.5019034-5020999	GAGA-0087	Myrmica scabrinodis	Myrmicinae	Ankyrin repeat protein	Wolbachia	Rickettsiales	Alphaproteobacteria	Scaffold1	5019034-5020999	Scaffold1:5019034-5020999	5019034	5020999	1965	47	47	47	ankyrin repeat protein	1	5019034	5018996	5020999	5021506	1965	2510	357	578	E9P653	COG:COG0666:ANKYR Ankyrin repeat [Category:T%2C Aligned:315-444%2C Eval:5.6e-18%2C score:80.6%2C N-term missing],COG:COG0666:ANKYR Ankyrin repeat [Category:T%2C Aligned:137-353%2C Eval:1.4e-16%2C score:76.8],COG:COG0666:ANKYR Ankyrin repeat [Category:T%2C Aligned:2-197%2C Eval:2.0e-10%2C score:58.7],MGA_1	TIGR:TIGR00870%3B trp: transient-receptor-potential calcium channel protein [Name:TIGR00870%2C Eval:2.1e-31%2C score:106.7%2C bias:5.2],COG:COG0666:ANKYR Ankyrin repeat [Category:T%2C Aligned:315-444%2C Eval:5.6e-18%2C score:80.6%2C N-term missing],COG:COG0666:ANKYR Ankyrin repeat [Category:T%2C Aligned:137-353%2C Eval:1.4e-16%2C score:76.8],COG:COG0666:ANKYR Ankyrin repeat [Category:T%2C Aligned…	64.3	58.3	100.0	97.8	73.0	90.5	7.0e-241		GAA	ATG	TAG	TAG	Wolbachia endosymbiont wVitB of Nasonia vitripennis phage WOVitB						unclassified Myoviridae	Caudoviricetes
GAGA-0087.Scaffold1.6128936-6131822	GAGA-0087	Myrmica scabrinodis	Myrmicinae	Ankyrin repeat protein	Wolbachia	Rickettsiales	Alphaproteobacteria	Scaffold1	6128936-6131822	Scaffold1:6128936-6131822	6128936	6131822	2886	39	47	32	ankyrin repeat protein	1	6128936	6128931	6131822	6131831	2886	2900	404	404	E9P653	COG:COG0666:ANKYR Ankyrin repeat [Category:T%2C Aligned:478-674%2C Eval:4.8e-20%2C score:87.6],COG:COG0666:ANKYR Ankyrin repeat [Category:T%2C Aligned:615-791%2C Eval:7.6e-18%2C score:81.0],COG:COG0666:ANKYR Ankyrin repeat [Category:T%2C Aligned:4-171%2C Eval:2.9e-17%2C score:79.5],COG:COG0666:ANKYR Ankyrin repeat [Category:T%2C Aligned:342-546%2C Eval:3.6e-15%2C score:73.3],COG:COG0666:ANKYR Ank…		25.5	25.5	75.7	75.4	78.2	78.2			TAC	ATG	GAA	TGA	Wolbachia endosymbiont wVitB of Nasonia vitripennis phage WOVitB						unclassified Myoviridae	Caudoviricetes
GAGA-0087.Scaffold1.6149907-6153212	GAGA-0087	Myrmica scabrinodis	Myrmicinae	Ankyrin repeat protein	Wolbachia	Rickettsiales	Alphaproteobacteria	Scaffold1	6149907-6153212	Scaffold1:6149907-6153212	6149907	6153212	3305	47	51	42	ankyrin repeat protein	1	6149907	6149869	6153212	6153216	3305	3347	178	190	E9P653	COG:COG0666:ANKYR Ankyrin repeat [Category:T%2C Aligned:533-749%2C Eval:1.4e-17%2C score:80.6],COG:COG0666:ANKYR Ankyrin repeat [Category:T%2C Aligned:51-274%2C Eval:1.9e-17%2C score:79.9],COG:COG0666:ANKYR Ankyrin repeat [Category:T%2C Aligned:659-884%2C Eval:8.3e-17%2C score:78.3],COG:COG0666:ANKYR Ankyrin repeat [Category:T%2C Aligned:460-587%2C Eval:2.1e-14%2C score:71.0%2C N-term missing],CO…	TIGR:TIGR00870%3B trp: transient-receptor-potential calcium channel protein [Name:TIGR00870%2C Eval:4.6e-53%2C score:178.3%2C bias:29.3],COG:COG0666:ANKYR Ankyrin repeat [Category:T%2C Aligned:533-749%2C Eval:1.4e-17%2C score:80.6],COG:COG0666:ANKYR Ankyrin repeat [Category:T%2C Aligned:51-274%2C Eval:1.9e-17%2C score:79.9],COG:COG0666:ANKYR Ankyrin repeat [Category:T%2C Aligned:659-884%2C Eval:8…	59.5	59.5	57.2	56.5	68.6	68.6	1.2e-206	1.2e-206	ATA	ATG	TAG	TAA	Wolbachia endosymbiont wVitB of Nasonia vitripennis phage WOVitB						unclassified Myoviridae	Caudoviricetes
GAGA-0087.Scaffold1.7949710-7952322	GAGA-0087	Myrmica scabrinodis	Myrmicinae	Ankyrin repeat protein	Wolbachia	Rickettsiales	Alphaproteobacteria	Scaffold1	7949710-7952322	Scaffold1:7949710-7952322	7949710	7952322	2612	22	15	12	ankyrin repeat protein	1	7949710	7949705	7952322	7952359	2612	2654	150	150	E9P653	COG:COG0666:ANKYR Ankyrin repeat [Category:T%2C Aligned:546-675%2C Eval:1.2e-18%2C score:83.3%2C N-term missing],COG:COG0666:ANKYR Ankyrin repeat [Category:T%2C Aligned:29-245%2C Eval:9.9e-16%2C score:74.9],COG:COG0666:ANKYR Ankyrin repeat [Category:T%2C Aligned:421-584%2C Eval:3.2e-14%2C score:70.2%2C N-term missing],COG:COG0666:ANKYR Ankyrin repeat [Category:T%2C Aligned:189-433%2C Eval:1.3e-11…		62.9	62.7	100.0	98.9	98.1	98.5			TAC	ATG	AGC	TAG	Wolbachia endosymbiont wVitB of Nasonia vitripennis phage WOVitB						unclassified Myoviridae	Caudoviricetes
GAGA-0087.Scaffold1.7969970-7972320	GAGA-0087	Myrmica scabrinodis	Myrmicinae	Ankyrin repeat protein	Wolbachia	Rickettsiales	Alphaproteobacteria	Scaffold1	7969970-7972320	Scaffold1:7969970-7972320	7969970	7972320	2350	18	23	17	Phosphocholine transferase AnkX_x000D__x000D_ ankyrin repeat protein	1	7969970	7969931	7972320	7972330	2350	2399	99	99	E9P653	COG:COG0666:ANKYR Ankyrin repeat [Category:T%2C Aligned:29-200%2C Eval:6.0e-20%2C score:86.8],COG:COG0666:ANKYR Ankyrin repeat [Category:T%2C Aligned:435-566%2C Eval:5.6e-18%2C score:81.0%2C N-term missing],COG:COG0666:ANKYR Ankyrin repeat [Category:T%2C Aligned:238-359%2C Eval:1.6e-17%2C score:79.9%2C N-term missing],MGA_1		44.5	44.5	95.4	93.9	76.1	76.4			ATA	ATG	GTA	TAG	Wolbachia endosymbiont wVitB of Nasonia vitripennis phage WOVitB						unclassified Myoviridae	Caudoviricetes
GAGA-0087.Scaffold1.7975130-7976999	GAGA-0087	Myrmica scabrinodis	Myrmicinae	Ankyrin repeat protein	Wolbachia	Rickettsiales	Alphaproteobacteria	Scaffold1	7975130-7976999	Scaffold1:7975130-7976999	7975130	7976999	1869	30	27	24	ankyrin repeat protein	1	7975130	7974622	7976999	7977030	1869	2408	369	558	E9P653	COG:COG0666:ANKYR Ankyrin repeat [Category:T%2C Aligned:306-435%2C Eval:5.5e-18%2C score:80.6%2C N-term missing],COG:COG0666:ANKYR Ankyrin repeat [Category:T%2C Aligned:195-344%2C Eval:1.9e-16%2C score:76.4%2C N-term missing],COG:COG0666:ANKYR Ankyrin repeat [Category:T%2C Aligned:1-100%2C Eval:5.2e-11%2C score:60.2%2C C-term missing],MGA_1	TIGR:TIGR00870%3B trp: transient-receptor-potential calcium channel protein [Name:TIGR00870%2C Eval:4.8e-29%2C score:98.9%2C bias:9.1],COG:COG0666:ANKYR Ankyrin repeat [Category:T%2C Aligned:306-435%2C Eval:5.5e-18%2C score:80.6%2C N-term missing],COG:COG0666:ANKYR Ankyrin repeat [Category:T%2C Aligned:195-344%2C Eval:1.9e-16%2C score:76.4%2C N-term missing],COG:COG0666:ANKYR Ankyrin repeat [Cate…	61.6	55.6	100.0	98.9	72.9	91.2	3.5e-226		AAG	ATG	AGA	TAG	Wolbachia endosymbiont wVitB of Nasonia vitripennis phage WOVitB						unclassified Myoviridae	Caudoviricetes
GAGA-0087.Scaffold1.9286514-9287847	GAGA-0087	Myrmica scabrinodis	Myrmicinae	Ankyrin repeat protein	Wolbachia	Rickettsiales	Alphaproteobacteria	Scaffold1	9286514-9287847	Scaffold1:9286514-9287847	9286514	9287847	1333	23	29	19	ankyrin repeat protein	2	9286514	9286509	9287798	9287798	1284	1289	96	96	E9P653	COG:COG0666:ANKYR Ankyrin repeat [Category:T%2C Aligned:124-243%2C Eval:1.5e-20%2C score:87.2%2C N-term missing],COG:COG0666:ANKYR Ankyrin repeat [Category:T%2C Aligned:46-163%2C Eval:9.6e-12%2C score:61.8%2C N-term missing],MGA_1	TIGR:TIGR00870%3B trp: transient-receptor-potential calcium channel protein [Name:TIGR00870%2C Eval:4.6e-17%2C score:59.3%2C bias:0.5],COG:COG0666:ANKYR Ankyrin repeat [Category:T%2C Aligned:124-243%2C Eval:1.5e-20%2C score:87.2%2C N-term missing],COG:COG0666:ANKYR Ankyrin repeat [Category:T%2C Aligned:46-163%2C Eval:9.6e-12%2C score:61.8%2C N-term missing],MGA_1	49.4	49.4	89.0	88.6	40.1	40.1	1.1e-94	1.1e-94	TAC	ATG	TAG	TAG	Wolbachia endosymbiont wVitB of Nasonia vitripennis phage WOVitB						unclassified Myoviridae	Caudoviricetes
GAGA-0087.Scaffold1.9286514-9287847	GAGA-0087	Myrmica scabrinodis	Myrmicinae		Wolbachia	Rickettsiales	Alphaproteobacteria	Scaffold1	9286514-9287847	Scaffold1:9286514-9287847	9286514	9287847	1333	23	29	19	ankyrin repeat protein	2	9287758	9286509	9287847	9287798	89	1289	0	96					49.4		88.6		40.1		1.1e-94	GCT	ATG	TAA	TAG
GAGA-0087.Scaffold1.9629060-9630376	GAGA-0087	Myrmica scabrinodis	Myrmicinae	Ankyrin repeat protein	Wolbachia	Rickettsiales	Alphaproteobacteria	Scaffold1	9629060-9630376	Scaffold1:9629060-9630376	9629060	9630376	1316	39	37	31	ankyrin repeat protein RBE_0489	1	9629060	9629013	9630376	9630380	1316	1367	174	174	E9P653	COG:COG0666:ANKYR Ankyrin repeat [Category:T%2C Aligned:31-237%2C Eval:2.4e-22%2C score:92.6],MGA_1	TIGR:TIGR00870%3B trp: transient-receptor-potential calcium channel protein [Name:TIGR00870%2C Eval:1.5e-15%2C score:54.3%2C bias:6.1],COG:COG0666:ANKYR Ankyrin repeat [Category:T%2C Aligned:31-237%2C Eval:2.4e-22%2C score:92.6],MGA_1	50.0	50.0	88.8	86.2	41.6	42.0	4.5e-102	2.1e-102	ATA	ATG	TAG	TGA	Wolbachia endosymbiont wVitB of Nasonia vitripennis phage WOVitB						unclassified Myoviridae	Caudoviricetes
GAGA-0087.Scaffold1.9720890-9725103	GAGA-0087	Myrmica scabrinodis	Myrmicinae	Ankyrin repeats family protein	Wolbachia	Rickettsiales	Alphaproteobacteria	Scaffold1	9720890-9725103	Scaffold1:9720890-9725103	9720890	9725103	4213	28	20	19	ankyrin repeat protein	3	9720890	9719891	9721786	9721786	896	1895	61	85	A0A5B9JVP8	COG:COG0666:ANKYR Ankyrin repeat [Category:T%2C Aligned:1-109%2C Eval:1.9e-12%2C score:62.9%2C N-term missing],MGA_1		57.4	67.0	99.0	58.3	83.7	39.3		9.4e-134	GGT	GAG	TGA	TGA	Wolbachia endosymbiont of Drosophila ananassae						Wolbachia	Rickettsiales
GAGA-0087.Scaffold1.9720890-9725103	GAGA-0087	Myrmica scabrinodis	Myrmicinae	Ankyrin repeats family protein	Wolbachia	Rickettsiales	Alphaproteobacteria	Scaffold1	9720890-9725103	Scaffold1:9720890-9725103	9720890	9725103	4213	28	20	19	ankyrin repeat protein	3	9724250	9724262	9725103	9725167	853	905	58	58	A0A5B9JVP8			60.1	59.9	95.8	91.4	78.8	79.7			GTG	TTG	AGC	TAG	Wolbachia endosymbiont of Drosophila ananassae						Wolbachia	Rickettsiales
GAGA-0087.Scaffold1.9720890-9725103	GAGA-0087	Myrmica scabrinodis	Myrmicinae	Ankyrin 3 (Ankyrin repeat family protein)	Wolbachia	Rickettsiales	Alphaproteobacteria	Scaffold1	9720890-9725103	Scaffold1:9720890-9725103	9720890	9725103	4213	28	20	19	ankyrin repeat protein	3	9722899	9722899	9724314	9724314	1415	1415	108	108	Q4EBI3	COG:COG0666:ANKYR Ankyrin repeat [Category:T%2C Aligned:8-149%2C Eval:6.1e-19%2C score:82.9%2C N-term missing],COG:COG0666:ANKYR Ankyrin repeat [Category:T%2C Aligned:219-424%2C Eval:1.3e-16%2C score:76.4],MGA_2	TIGR:TIGR00870%3B trp: transient-receptor-potential calcium channel protein [Name:TIGR00870%2C Eval:2.1e-28%2C score:96.8%2C bias:11.8],COG:COG0666:ANKYR Ankyrin repeat [Category:T%2C Aligned:8-149%2C Eval:6.1e-19%2C score:82.9%2C N-term missing],COG:COG0666:ANKYR Ankyrin repeat [Category:T%2C Aligned:219-424%2C Eval:1.3e-16%2C score:76.4],MGA_2	58.8	58.8	86.8	86.8	72.6	72.6	7.5e-135	7.5e-135	ATG	ATG	TGA	TGA	Wolbachia endosymbiont of Drosophila ananassae						Wolbachia	Rickettsiales
GAGA-0087.Scaffold1.9985378-9987294	GAGA-0087	Myrmica scabrinodis	Myrmicinae	Ankyrin repeat protein	Wolbachia	Rickettsiales	Alphaproteobacteria	Scaffold1	9985378-9987294	Scaffold1:9985378-9987294	9985378	9987294	1916	39	32	31	ankyrin repeat protein	1	9985378	9985373	9987294	9988276	1916	2903	1218	2328	E9P653	COG:COG0666:ANKYR Ankyrin repeat [Category:T%2C Aligned:508-636%2C Eval:1.3e-19%2C score:85.6%2C N-term missing],COG:COG0666:ANKYR Ankyrin repeat [Category:T%2C Aligned:63-292%2C Eval:3.3e-17%2C score:78.3],COG:COG0666:ANKYR Ankyrin repeat [Category:T%2C Aligned:342-546%2C Eval:8.5e-15%2C score:71.4],MGA_1	TIGR:TIGR00870%3B trp: transient-receptor-potential calcium channel protein [Name:TIGR00870%2C Eval:3.0e-45%2C score:152.5%2C bias:16.7],COG:COG0666:ANKYR Ankyrin repeat [Category:T%2C Aligned:508-636%2C Eval:1.3e-19%2C score:85.6%2C N-term missing],COG:COG0666:ANKYR Ankyrin repeat [Category:T%2C Aligned:63-292%2C Eval:3.3e-17%2C score:78.3],COG:COG0666:ANKYR Ankyrin repeat [Category:T%2C Aligned…	64.1	47.4	95.0	99.0	64.5	98.5	1.1e-214		TAC	ATG	TAA	TAG	Wolbachia endosymbiont wVitB of Nasonia vitripennis phage WOVitB						unclassified Myoviridae	Caudoviricetes
GAGA-0087.Scaffold1.9996278-9999194	GAGA-0087	Myrmica scabrinodis	Myrmicinae	Ankyrin repeat protein	Wolbachia	Rickettsiales	Alphaproteobacteria	Scaffold1	9996278-9999194	Scaffold1:9996278-9999194	9996278	9999194	2916	18	21	16	ankyrin repeat protein	1	9996278	9996273	9999194	9999203	2916	2930	503	503	E9P653	COG:COG0666:ANKYR Ankyrin repeat [Category:T%2C Aligned:563-702%2C Eval:4.1e-20%2C score:87.6%2C N-term missing],COG:COG0666:ANKYR Ankyrin repeat [Category:T%2C Aligned:63-292%2C Eval:2.5e-16%2C score:76.8],COG:COG0666:ANKYR Ankyrin repeat [Category:T%2C Aligned:368-542%2C Eval:1.4e-12%2C score:65.6],MGA_1		41.6	41.5	100.0	99.7	96.3	96.4			TAC	ATG	GAA	TGA	Wolbachia endosymbiont wVitB of Nasonia vitripennis phage WOVitB						unclassified Myoviridae	Caudoviricetes
GAGA-0087.Scaffold114.781467-782319	GAGA-0087	Myrmica scabrinodis	Myrmicinae	Ankyrin 3 (Ankyrin repeat family protein)	Wolbachia	Rickettsiales	Alphaproteobacteria	Scaffold114	781467-782319	Scaffold114:781467-782319	781467	782319	852	27	27	25	ankyrin repeat protein	1	781467	781462	782319	782526	852	1064	322	332	Q4EBI3	COG:COG0666:ANKYR Ankyrin repeat [Category:T%2C Aligned:51-230%2C Eval:9.8e-21%2C score:85.6],MGA_1	TIGR:TIGR00870%3B trp: transient-receptor-potential calcium channel protein [Name:TIGR00870%2C Eval:2.9e-31%2C score:106.3%2C bias:3.7],COG:COG0666:ANKYR Ankyrin repeat [Category:T%2C Aligned:51-230%2C Eval:9.8e-21%2C score:85.6],MGA_1	67.8	66.4	100.0	96.9	45.9	55.4	2.2e-102	3.0e-124	TAC	ATG	GGG	TAG	Wolbachia endosymbiont of Drosophila ananassae						Wolbachia	Rickettsiales
GAGA-0087.Scaffold12.5734210-5734855	GAGA-0087	Myrmica scabrinodis	Myrmicinae	Ankyrin 3 (Ankyrin repeat family protein)	Wolbachia	Rickettsiales	Alphaproteobacteria	Scaffold12	5734210-5734855	Scaffold12:5734210-5734855	5734210	5734855	645	45	44	41	ankyrin repeat protein	1	5734210	5734205	5734855	5735686	645	1481	497	847	Q4EBI3	COG:COG0666:ANKYR Ankyrin repeat [Category:T%2C Aligned:12-204%2C Eval:4.0e-21%2C score:84.9],MGA_1	TIGR:TIGR00870%3B trp: transient-receptor-potential calcium channel protein [Name:TIGR00870%2C Eval:4.3e-24%2C score:82.5%2C bias:2.1],COG:COG0666:ANKYR Ankyrin repeat [Category:T%2C Aligned:12-204%2C Eval:4.0e-21%2C score:84.9],MGA_1	65.4	60.2	100.0	92.5	35.0	48.6	2.7e-70	2.1e-143	TAC	ATG	GGG	TGA	Wolbachia endosymbiont of Drosophila ananassae						Wolbachia	Rickettsiales
GAGA-0087.Scaffold128.75243-76634	GAGA-0087	Myrmica scabrinodis	Myrmicinae	Ankyrin repeat protein	Wolbachia	Rickettsiales	Alphaproteobacteria	Scaffold128	75243-76634	Scaffold128:75243-76634	75243	76634	1391	34	31	30	ankyrin repeat protein	1	75243	75205	76634	76638	1391	1433	1367	1375	E9P653	COG:COG0666:ANKYR Ankyrin repeat [Category:T%2C Aligned:70-227%2C Eval:9.5e-20%2C score:85.3%2C N-term missing],MGA_1	TIGR:TIGR00870%3B trp: transient-receptor-potential calcium channel protein [Name:TIGR00870%2C Eval:1.3e-15%2C score:54.5%2C bias:5.2],COG:COG0666:ANKYR Ankyrin repeat [Category:T%2C Aligned:70-227%2C Eval:9.5e-20%2C score:85.3%2C N-term missing],MGA_1	52.0	51.9	90.5	88.5	42.2	42.5	2.2e-107	1.0e-107	ATA	ATG	TAG	TAG	Wolbachia endosymbiont wVitB of Nasonia vitripennis phage WOVitB						unclassified Myoviridae	Caudoviricetes
GAGA-0087.Scaffold15.4669630-4676000	GAGA-0087	Myrmica scabrinodis	Myrmicinae	Ankyrin repeat domain protein	Wolbachia	Rickettsiales	Alphaproteobacteria	Scaffold15	4669630-4676000	Scaffold15:4669630-4676000	4669630	4676000	6370	26	39	21	ankyrin repeat protein	1	4669937	4669937	4676000	4676833	6063	6896	4938	7296	C0R3E9	COG:COG0666:ANKYR Ankyrin repeat [Category:T%2C Aligned:416-643%2C Eval:5.5e-19%2C score:85.3],COG:COG0666:ANKYR Ankyrin repeat [Category:T%2C Aligned:642-778%2C Eval:6.2e-19%2C score:85.3%2C N-term missing],COG:COG0666:ANKYR Ankyrin repeat [Category:T%2C Aligned:808-974%2C Eval:4.0e-18%2C score:82.9%2C N-term missing],COG:COG0666:ANKYR Ankyrin repeat [Category:T%2C Aligned:1105-1274%2C Eval:4.0e…		63.4	65.5	99.9	99.7	82.9	94.1			GGA	TTG	TAA	TAA	Wolbachia sp. subsp. Drosophila simulans (strain wRi)						Wolbachia	Rickettsiales
GAGA-0087.Scaffold18.2796209-2799547	GAGA-0087	Myrmica scabrinodis	Myrmicinae	Ankyrin 3 (Ankyrin repeat family protein)	Wolbachia	Rickettsiales	Alphaproteobacteria	Scaffold18	2796209-2799547	Scaffold18:2796209-2799547	2796209	2799547	3338	33	31	26	ankyrin repeat protein	2	2798487	2798487	2799547	2799551	1060	1064	46	46	Q4EBI3	COG:COG0666:ANKYR Ankyrin repeat [Category:T%2C Aligned:52-233%2C Eval:1.7e-18%2C score:80.6],COG:COG0666:ANKYR Ankyrin repeat [Category:T%2C Aligned:198-339%2C Eval:1.4e-15%2C score:72.2%2C N-term missing],MGA_2	TIGR:TIGR00870%3B trp: transient-receptor-potential calcium channel protein [Name:TIGR00870%2C Eval:2.9e-31%2C score:106.2%2C bias:7.8],COG:COG0666:ANKYR Ankyrin repeat [Category:T%2C Aligned:52-233%2C Eval:1.7e-18%2C score:80.6],COG:COG0666:ANKYR Ankyrin repeat [Category:T%2C Aligned:198-339%2C Eval:1.4e-15%2C score:72.2%2C N-term missing],MGA_2	64.8	64.6	97.2	96.9	55.3	55.4	7.4e-123	5.6e-123	ATA	ATG	TAG	TAG	Wolbachia endosymbiont of Drosophila ananassae						Wolbachia	Rickettsiales
GAGA-0087.Scaffold18.2796209-2799547	GAGA-0087	Myrmica scabrinodis	Myrmicinae	Ankyrin repeat protein	Wolbachia	Rickettsiales	Alphaproteobacteria	Scaffold18	2796209-2799547	Scaffold18:2796209-2799547	2796209	2799547	3338	33	31	26	ankyrin repeat protein	2	2796518	2796518	2797183	2797183	665	665	41	41	E9P653	COG:COG0666:ANKYR Ankyrin repeat [Category:T%2C Aligned:37-165%2C Eval:2.0e-17%2C score:75.2%2C N-term missing],MGA_1	TIGR:TIGR00870%3B trp: transient-receptor-potential calcium channel protein [Name:TIGR00870%2C Eval:3.4e-16%2C score:56.4%2C bias:0.9],COG:COG0666:ANKYR Ankyrin repeat [Category:T%2C Aligned:37-165%2C Eval:2.0e-17%2C score:75.2%2C N-term missing],MGA_1	53.7	53.7	73.3	73.3	16.1	16.1	2.9e-38	2.9e-38	ATG	ATG	TGA	TGA	Wolbachia endosymbiont wVitB of Nasonia vitripennis phage WOVitB						unclassified Myoviridae	Caudoviricetes
GAGA-0087.Scaffold18.3183256-3183459	GAGA-0087	Myrmica scabrinodis	Myrmicinae	Ankyrin repeat protein	Wolbachia	Rickettsiales	Alphaproteobacteria	Scaffold18	3183256-3183459	Scaffold18:3183256-3183459	3183256	3183459	203	20	20	11	ankyrin repeat protein	1	3183256	3183166	3183459	3183435	203	269	0	0	E9P653			69.1	72.2	100.0	80.9	7.2	7.6	1.8e-19	5.7e-21	TTA	ATG	AAG	TAG	Wolbachia endosymbiont wVitB of Nasonia vitripennis phage WOVitB						unclassified Myoviridae	Caudoviricetes
GAGA-0087.Scaffold195.183704-186794	GAGA-0087	Myrmica scabrinodis	Myrmicinae	Ankyrin repeat protein	Wolbachia	Rickettsiales	Alphaproteobacteria	Scaffold195	183704-186794	Scaffold195:183704-186794	183704	186794	3090	20	20	18	ankyrin repeat protein	1	183704	183678	186794	187316	3090	3638	1545	1941	E9P653	COG:COG0666:ANKYR Ankyrin repeat [Category:T%2C Aligned:616-788%2C Eval:4.6e-19%2C score:84.9],COG:COG0666:ANKYR Ankyrin repeat [Category:T%2C Aligned:479-687%2C Eval:5.0e-16%2C score:75.6],COG:COG0666:ANKYR Ankyrin repeat [Category:T%2C Aligned:69-206%2C Eval:9.9e-15%2C score:72.2%2C N-term missing],COG:COG0666:ANKYR Ankyrin repeat [Category:T%2C Aligned:1-131%2C Eval:1.0e-14%2C score:71.8%2C N-…		59.0	59.0	93.0	79.0	98.1	98.1			ACA	ATG	CAA	TAG	Wolbachia endosymbiont wVitB of Nasonia vitripennis phage WOVitB						unclassified Myoviridae	Caudoviricetes
GAGA-0087.Scaffold215.282597-283653	GAGA-0087	Myrmica scabrinodis	Myrmicinae	Ankyrin repeat domain protein	Wolbachia	Rickettsiales	Alphaproteobacteria	Scaffold215	282597-283653	Scaffold215:282597-283653	282597	283653	1056	30	28	24	ankyrin repeat protein	3	283280	283280	283653	284359	373	1079	0	0	B6Y9L2			57.1	35.6	84.6	91.4	2.0	6.9	3.1e-19	9.8e-38	ATA	TTG	TAA	TAA	Wolbachia endosymbiont of Culex quinquefasciatus JHB						Wolbachia	Rickettsiales
GAGA-0087.Scaffold215.282597-283653	GAGA-0087	Myrmica scabrinodis	Myrmicinae	Uncharacterized protein	Wolbachia	Rickettsiales	Alphaproteobacteria	Scaffold215	282597-283653	Scaffold215:282597-283653	282597	283653	1056	30	28	24	ankyrin repeat protein	3	282597	282514	282801	282801	204	287	48	48	Q73HN8			79.7	79.7	89.6	63.2	20.7	20.7	1.0e-19	1.0e-19	TTA	ATG	TGA	TGA	Wolbachia pipientis wMel						Wolbachia	Rickettsiales
GAGA-0087.Scaffold215.282597-283653	GAGA-0087	Myrmica scabrinodis	Myrmicinae		Wolbachia	Rickettsiales	Alphaproteobacteria	Scaffold215	282597-283653	Scaffold215:282597-283653	282597	283653	1056	30	28	24	ankyrin repeat protein	3	282955	282955	283128	283128	173	173	4	4												ATG	ATG	TGA	TGA
GAGA-0087.Scaffold25.2479233-2479991	GAGA-0087	Myrmica scabrinodis	Myrmicinae	Ankyrin repeats family protein	Wolbachia	Rickettsiales	Alphaproteobacteria	Scaffold25	2479233-2479991	Scaffold25:2479233-2479991	2479233	2479991	758	10	11	10	ankyrin repeat protein	1	2479233	2479220	2479991	2480991	758	1771	258	489	A0A5B9JVP8	COG:COG0666:ANKYR Ankyrin repeat [Category:T%2C Aligned:1-140%2C Eval:2.6e-09%2C score:53.3%2C N-term missing],MGA_1		61.7	69.4	100.0	57.9	73.4	36.6	5.5e-80	3.9e-126	AAC	AAG	AGA	TGA	Wolbachia endosymbiont of Drosophila ananassae						Wolbachia	Rickettsiales
GAGA-0087.Scaffold25.412449-415366	GAGA-0087	Myrmica scabrinodis	Myrmicinae	Ankyrin repeat protein	Wolbachia	Rickettsiales	Alphaproteobacteria	Scaffold25	412449-415366	Scaffold25:412449-415366	412449	415366	2917	28	32	27	ankyrin repeat protein	1	412449	412459	415366	415380	2917	2921	1851	2278	E9P653	COG:COG0666:ANKYR Ankyrin repeat [Category:T%2C Aligned:545-729%2C Eval:1.2e-21%2C score:92.2],COG:COG0666:ANKYR Ankyrin repeat [Category:T%2C Aligned:49-242%2C Eval:2.5e-19%2C score:85.3],COG:COG0666:ANKYR Ankyrin repeat [Category:T%2C Aligned:640-855%2C Eval:1.8e-18%2C score:82.9],COG:COG0666:ANKYR Ankyrin repeat [Category:T%2C Aligned:312-538%2C Eval:2.6e-15%2C score:73.7],MGA_1	TIGR:TIGR00870%3B trp: transient-receptor-potential calcium channel protein [Name:TIGR00870%2C Eval:4.6e-54%2C score:181.6%2C bias:25.1],COG:COG0666:ANKYR Ankyrin repeat [Category:T%2C Aligned:545-729%2C Eval:1.2e-21%2C score:92.2],COG:COG0666:ANKYR Ankyrin repeat [Category:T%2C Aligned:49-242%2C Eval:2.5e-19%2C score:85.3],COG:COG0666:ANKYR Ankyrin repeat [Category:T%2C Aligned:640-855%2C Eval:1…	58.5	58.9	64.9	64.9	68.1	68.1	5.6e-200	5.7e-200	GTT	ATG	TAA	TGA	Wolbachia endosymbiont wVitB of Nasonia vitripennis phage WOVitB						unclassified Myoviridae	Caudoviricetes
GAGA-0087.Scaffold26.262460-265727	GAGA-0087	Myrmica scabrinodis	Myrmicinae	Ankyrin repeat protein	Wolbachia	Rickettsiales	Alphaproteobacteria	Scaffold26	262460-265727	Scaffold26:262460-265727	262460	265727	3267	17	18	16	ankyrin repeat protein	1	262460	262447	265727	265731	3267	3284	221	221	E9P653	COG:COG0666:ANKYR Ankyrin repeat [Category:T%2C Aligned:711-905%2C Eval:6.9e-24%2C score:98.7],COG:COG0666:ANKYR Ankyrin repeat [Category:T%2C Aligned:552-737%2C Eval:9.4e-23%2C score:95.7],COG:COG0666:ANKYR Ankyrin repeat [Category:T%2C Aligned:31-236%2C Eval:1.7e-18%2C score:82.9],COG:COG0666:ANKYR Ankyrin repeat [Category:T%2C Aligned:426-572%2C Eval:7.2e-16%2C score:75.2%2C N-term missing],CO…		26.0	26.0	78.6	78.2	91.4	91.4			ATA	ATG	AGA	TGA	Wolbachia endosymbiont wVitB of Nasonia vitripennis phage WOVitB						unclassified Myoviridae	Caudoviricetes
GAGA-0087.Scaffold28.887364-890135	GAGA-0087	Myrmica scabrinodis	Myrmicinae	Ankyrin repeat protein	Wolbachia	Rickettsiales	Alphaproteobacteria	Scaffold28	887364-890135	Scaffold28:887364-890135	887364	890135	2771	19	20	19	ankyrin repeat protein	1	887364	887326	890135	890139	2771	2813	2570	2580	E9P653	COG:COG0666:ANKYR Ankyrin repeat [Category:T%2C Aligned:104-304%2C Eval:3.1e-20%2C score:88.0],COG:COG0666:ANKYR Ankyrin repeat [Category:T%2C Aligned:583-717%2C Eval:1.5e-19%2C score:86.0%2C N-term missing],COG:COG0666:ANKYR Ankyrin repeat [Category:T%2C Aligned:29-158%2C Eval:2.1e-16%2C score:76.8%2C N-term missing],COG:COG0666:ANKYR Ankyrin repeat [Category:T%2C Aligned:484-617%2C Eval:1.1e-12…		71.6	71.4	100.0	98.9	98.1	98.5			ATA	ATG	TAG	TAG	Wolbachia endosymbiont wVitB of Nasonia vitripennis phage WOVitB						unclassified Myoviridae	Caudoviricetes
GAGA-0087.Scaffold31.1645852-1653131	GAGA-0087	Myrmica scabrinodis	Myrmicinae	Ankyrin repeat domain protein	Wolbachia	Rickettsiales	Alphaproteobacteria	Scaffold31	1645852-1653131	Scaffold31:1645852-1653131	1645852	1653131	7279	25	27	25	ankyrin repeat protein	1	1646097	1646097	1653131	1653164	7034	7067	3371	3372	C0R3E9	COG:COG0666:ANKYR Ankyrin repeat [Category:T%2C Aligned:1027-1213%2C Eval:9.7e-21%2C score:90.7],COG:COG0666:ANKYR Ankyrin repeat [Category:T%2C Aligned:1400-1601%2C Eval:1.1e-17%2C score:81.8],COG:COG0666:ANKYR Ankyrin repeat [Category:T%2C Aligned:687-889%2C Eval:2.4e-17%2C score:81.0],COG:COG0666:ANKYR Ankyrin repeat [Category:T%2C Aligned:1305-1441%2C Eval:4.9e-16%2C score:77.2%2C N-term miss…		79.7	79.6	100.0	99.7	94.5	94.8			ACT	TTG	TAA	TAA	Wolbachia sp. subsp. Drosophila simulans (strain wRi)						Wolbachia	Rickettsiales
GAGA-0087.Scaffold33.1496747-1500819	GAGA-0087	Myrmica scabrinodis	Myrmicinae	Ankyrin repeat domain protein	Wolbachia	Rickettsiales	Alphaproteobacteria	Scaffold33	1496747-1500819	Scaffold33:1496747-1500819	1496747	1500819	4072	13	13	12	ankyrin repeat protein	2	1496747	1496702	1497139	1497139	392	437	124	135	C0R3E9			73.7	73.7	100.0	90.3	5.4	5.4	3.5e-47	3.5e-47	TTG	TTG	ATA	TAA	Wolbachia sp. subsp. Drosophila simulans (strain wRi)						Wolbachia	Rickettsiales
GAGA-0087.Scaffold33.1496747-1500819	GAGA-0087	Myrmica scabrinodis	Myrmicinae	Uncharacterized ANK	Wolbachia	Rickettsiales	Alphaproteobacteria	Scaffold33	1496747-1500819	Scaffold33:1496747-1500819	1496747	1500819	4072	13	13	12	ankyrin repeat protein	2	1497375	1497375	1500819	1501819	3444	4444	907	996	A0A176Q8J2	COG:COG0666:ANKYR Ankyrin repeat [Category:T%2C Aligned:1-155%2C Eval:1.3e-17%2C score:80.6%2C N-term missing],COG:COG0666:ANKYR Ankyrin repeat [Category:T%2C Aligned:784-935%2C Eval:7.7e-17%2C score:78.3%2C N-term missing],COG:COG0666:ANKYR Ankyrin repeat [Category:T%2C Aligned:386-521%2C Eval:3.8e-16%2C score:76.4%2C N-term missing],MGA_2		32.9	49.0	81.6	35.5	94.5	20.2		2.3e-131	TAA	TAC	TAA	TAA	Wolbachia endosymbiont of Laodelphax striatellus						Wolbachia	Rickettsiales
GAGA-0087.Scaffold383.14647-14826	GAGA-0087	Myrmica scabrinodis	Myrmicinae		Wolbachia	Rickettsiales	Alphaproteobacteria	Scaffold383	14647-14826	Scaffold383:14647-14826	14647	14826	179	18	15	12	hypothetical protein	1	14647		14722		75		6													ACA		TAG
GAGA-0087.Scaffold383.15834-17719	GAGA-0087	Myrmica scabrinodis	Myrmicinae		Wolbachia	Rickettsiales	Alphaproteobacteria	Scaffold383	15834-17719	Scaffold383:15834-17719	15834	17719	1885	35	35	35	hypothetical protein	3	15834	15659	15916	15916	82	257	22	42					62.5		94.1		89.5			ATG	ATG	AGG	TGA
GAGA-0087.Scaffold383.15834-17719	GAGA-0087	Myrmica scabrinodis	Myrmicinae		Wolbachia	Rickettsiales	Alphaproteobacteria	Scaffold383	15834-17719	Scaffold383:15834-17719	15834	17719	1885	35	35	35	hypothetical protein	3	16307	16307	16453	16453	146	146	47	47												ATG	ATG	TAG	TAG
GAGA-0087.Scaffold383.15834-17719	GAGA-0087	Myrmica scabrinodis	Myrmicinae		Wolbachia	Rickettsiales	Alphaproteobacteria	Scaffold383	15834-17719	Scaffold383:15834-17719	15834	17719	1885	35	35	35	hypothetical protein	3	16972	17248	17121	17583	149	335	1	37					90.8		78.4		28.4		2.4e-40	ATG	TTG	TAG	TAG
GAGA-0087.Scaffold4.513873-516500	GAGA-0087	Myrmica scabrinodis	Myrmicinae	Uncharacterized ANK	Wolbachia	Rickettsiales	Alphaproteobacteria	Scaffold4	513873-516500	Scaffold4:513873-516500	513873	516500	2627	34	32	28	ankyrin repeat protein	1	513873	512874	516500	516857	2627	3983	68	70	A0A176Q8J2	COG:COG0666:ANKYR Ankyrin repeat [Category:T%2C Aligned:389-553%2C Eval:1.7e-18%2C score:82.9%2C N-term missing],COG:COG0666:ANKYR Ankyrin repeat [Category:T%2C Aligned:1-155%2C Eval:2.7e-18%2C score:82.2%2C N-term missing],COG:COG0666:ANKYR Ankyrin repeat [Category:T%2C Aligned:755-876%2C Eval:7.3e-08%2C score:51.4%2C C-term missing],MGA_1	TIGR:TIGR00870%3B trp: transient-receptor-potential calcium channel protein [Name:TIGR00870%2C Eval:4.8e-15%2C score:52.6%2C bias:23.7],COG:COG0666:ANKYR Ankyrin repeat [Category:T%2C Aligned:389-553%2C Eval:1.7e-18%2C score:82.9%2C N-term missing],COG:COG0666:ANKYR Ankyrin repeat [Category:T%2C Aligned:1-155%2C Eval:2.7e-18%2C score:82.2%2C N-term missing],COG:COG0666:ANKYR Ankyrin repeat [Categ…	40.4	48.5	67.6	40.0	63.5	22.3	4.0e-96	4.0e-135	AAG	TGT	GCA	TAA	Wolbachia endosymbiont of Laodelphax striatellus						Wolbachia	Rickettsiales
GAGA-0087.Scaffold45.1616058-1619001	GAGA-0087	Myrmica scabrinodis	Myrmicinae	Ankyrin repeat protein	Wolbachia	Rickettsiales	Alphaproteobacteria	Scaffold45	1616058-1619001	Scaffold45:1616058-1619001	1616058	1619001	2943	16	14	12	ankyrin repeat protein	1	1616058	1616045	1619001	1619005	2943	2960	959	959	E9P653	COG:COG0666:ANKYR Ankyrin repeat [Category:T%2C Aligned:569-743%2C Eval:6.6e-23%2C score:95.7],COG:COG0666:ANKYR Ankyrin repeat [Category:T%2C Aligned:378-545%2C Eval:3.1e-22%2C score:93.7],COG:COG0666:ANKYR Ankyrin repeat [Category:T%2C Aligned:43-236%2C Eval:1.2e-18%2C score:83.3],COG:COG0666:ANKYR Ankyrin repeat [Category:T%2C Aligned:298-448%2C Eval:5.2e-11%2C score:61.0],MGA_1		47.2	47.1	100.0	99.6	96.2	96.4			ATA	ATG	AGA	TGA	Wolbachia endosymbiont wVitB of Nasonia vitripennis phage WOVitB						unclassified Myoviridae	Caudoviricetes
GAGA-0087.Scaffold5.10330493-10333060	GAGA-0087	Myrmica scabrinodis	Myrmicinae	Ankyrin repeat protein	Wolbachia	Rickettsiales	Alphaproteobacteria	Scaffold5	10330493-10333060	Scaffold5:10330493-10333060	10330493	10333060	2567	15	19	14	ankyrin repeat protein	1	10330493	10330455	10333060	10333064	2567	2609	5211	5212	E9P653	COG:COG0666:ANKYR Ankyrin repeat [Category:T%2C Aligned:541-670%2C Eval:3.6e-19%2C score:84.9%2C N-term missing],COG:COG0666:ANKYR Ankyrin repeat [Category:T%2C Aligned:60-242%2C Eval:3.9e-15%2C score:72.9%2C N-term missing],COG:COG0666:ANKYR Ankyrin repeat [Category:T%2C Aligned:309-479%2C Eval:1.3e-12%2C score:65.6%2C C-term missing],MGA_1		61.7	61.5	100.0	98.8	98.1	98.5			ATA	ATG	TAG	TAG	Wolbachia endosymbiont wVitB of Nasonia vitripennis phage WOVitB						unclassified Myoviridae	Caudoviricetes
GAGA-0087.Scaffold736.10416-13234	GAGA-0087	Myrmica scabrinodis	Myrmicinae	Ankyrin repeat protein	Wolbachia	Rickettsiales	Alphaproteobacteria	Scaffold736	10416-13234	Scaffold736:10416-13234	10416	13234	2818	85	90	76	ankyrin repeat protein RF_0381	1	10416	10426	13234	13248	2818	2822	102	102	E9P653	COG:COG0666:ANKYR Ankyrin repeat [Category:T%2C Aligned:550-748%2C Eval:1.4e-22%2C score:94.9],COG:COG0666:ANKYR Ankyrin repeat [Category:T%2C Aligned:49-242%2C Eval:1.4e-18%2C score:82.9],COG:COG0666:ANKYR Ankyrin repeat [Category:T%2C Aligned:404-538%2C Eval:9.8e-15%2C score:71.8%2C N-term missing],COG:COG0666:ANKYR Ankyrin repeat [Category:T%2C Aligned:208-398%2C Eval:2.1e-09%2C score:56.0],MG…		40.6	32.4	96.0	95.9	85.5	85.5			GTT	ATG	TAA	TGA	Wolbachia endosymbiont wVitB of Nasonia vitripennis phage WOVitB						unclassified Myoviridae	Caudoviricetes
GAGA-0087.Scaffold81.1019631-1021148	GAGA-0087	Myrmica scabrinodis	Myrmicinae	Ankyrin repeat protein	Wolbachia	Rickettsiales	Alphaproteobacteria	Scaffold81	1019631-1021148	Scaffold81:1019631-1021148	1019631	1021148	1517	16	13	13	ankyrin-containing_lipid_protein	1	1019631	1019593	1021148	1021152	1517	1559	3647	3670	E9P653	COG:COG0666:ANKYR Ankyrin repeat [Category:T%2C Aligned:66-292%2C Eval:3.0e-24%2C score:98.4],MGA_1	TIGR:TIGR00870%3B trp: transient-receptor-potential calcium channel protein [Name:TIGR00870%2C Eval:1.1e-19%2C score:68.0%2C bias:2.0],COG:COG0666:ANKYR Ankyrin repeat [Category:T%2C Aligned:66-292%2C Eval:3.0e-24%2C score:98.4],MGA_1	49.8	49.7	91.7	89.8	50.7	51.1	2.6e-112	1.2e-112	ATA	ATG	TAG	TAG	Wolbachia endosymbiont wVitB of Nasonia vitripennis phage WOVitB						unclassified Myoviridae	Caudoviricetes
GAGA-0087.Scaffold89.765064-765989	GAGA-0087	Myrmica scabrinodis	Myrmicinae	Ankyrin repeats family protein	Wolbachia	Rickettsiales	Alphaproteobacteria	Scaffold89	765064-765989	Scaffold89:765064-765989	765064	765989	925	51	51	42	ankyrin repeat protein	1	765064	765037	765989	766989	925	1952	12	78	A0A5B9JVP8	COG:COG0666:ANKYR Ankyrin repeat [Category:T%2C Aligned:5-133%2C Eval:9.1e-14%2C score:66.8%2C N-term missing],MGA_1		63.1	53.8	100.0	99.5	89.4	72.0		3.6e-181	TAA	GTT	TGT	TAG	Wolbachia endosymbiont of Drosophila ananassae						Wolbachia	Rickettsiales
GAGA-0087.Scaffold89.889268-892087	GAGA-0087	Myrmica scabrinodis	Myrmicinae	Ankyrin repeat domain protein	Wolbachia	Rickettsiales	Alphaproteobacteria	Scaffold89	889268-892087	Scaffold89:889268-892087	889268	892087	2819	29	28	28	ankyrin repeat protein	5	890356	890356	890748	890748	392	392	74	74	C0R3E9			77.2	77.2	97.7	97.7	5.1	5.1	3.2e-48	3.2e-48	TTG	TTG	TAG	TAG	Wolbachia sp. subsp. Drosophila simulans (strain wRi)						Wolbachia	Rickettsiales
GAGA-0087.Scaffold89.889268-892087	GAGA-0087	Myrmica scabrinodis	Myrmicinae	Transposase	Wolbachia	Rickettsiales	Alphaproteobacteria	Scaffold89	889268-892087	Scaffold89:889268-892087	889268	892087	2819	29	28	28	ankyrin repeat protein	5	889394	889394	889651	889651	257	155	195	90	A0A176Q8R4		TIGR:TIGR01784%3B T_den_put_tspse: conserved hypothetical protein [Name:TIGR01784%2C Eval:9.4e-10%2C score:36.7%2C bias:0.1],MGA_1	89.5	96.1	88.2	100.0	26.4	17.2	9.5e-29	6.2e-20	TTG	ATG	TAA	TAA	Wolbachia endosymbiont of Laodelphax striatellus						Wolbachia	Rickettsiales
GAGA-0087.Scaffold89.889268-892087	GAGA-0087	Myrmica scabrinodis	Myrmicinae	Transposase	Wolbachia	Rickettsiales	Alphaproteobacteria	Scaffold89	889268-892087	Scaffold89:889268-892087	889268	892087	2819	29	28	28	ankyrin repeat protein	5	889626	889496	889916	889916	290	290	16	16	A0A178GV80			86.4		68.8		24.9		1.1e-26	1.1e-13	ATG		TAA		Wolbachia endosymbiont of Dactylopius coccus						Wolbachia	Rickettsiales
GAGA-0087.Scaffold89.889268-892087	GAGA-0087	Myrmica scabrinodis	Myrmicinae	Uncharacterized protein	Wolbachia	Rickettsiales	Alphaproteobacteria	Scaffold89	889268-892087	Scaffold89:889268-892087	889268	892087	2819	29	28	28	ankyrin repeat protein	5	890016	890016	890219	890219	203	203	9	9	A0A060Q487		TIGR:TIGR01784%3B T_den_put_tspse: conserved hypothetical protein [Name:TIGR01784%2C Eval:1.6e-10%2C score:39.2%2C bias:3.5],MGA_3	54.9	54.9	98.5	98.5	26.4	26.4	1.1e-13		ATG	ATG	TGA	TGA	Wolbachia endosymbiont of Cimex lectularius						Wolbachia	Rickettsiales
GAGA-0087.Scaffold89.889268-892087	GAGA-0087	Myrmica scabrinodis	Myrmicinae	Ankyrin repeat domain protein	Wolbachia	Rickettsiales	Alphaproteobacteria	Scaffold89	889268-892087	Scaffold89:889268-892087	889268	892087	2819	29	28	28	ankyrin repeat protein	5	890984	890984	892087	893087	1103	2103	199	400	C0R3E9	COG:COG0666:ANKYR Ankyrin repeat [Category:T%2C Aligned:4-155%2C Eval:8.6e-18%2C score:78.7%2C N-term missing],MGA_5	TIGR:TIGR00870%3B trp: transient-receptor-potential calcium channel protein [Name:TIGR00870%2C Eval:1.2e-07%2C score:28.1%2C bias:4.1],COG:COG0666:ANKYR Ankyrin repeat [Category:T%2C Aligned:4-155%2C Eval:8.6e-18%2C score:78.7%2C N-term missing],MGA_5	74.4	42.3	53.1	72.7	7.9	55.2	1.4e-76	5.2e-88	AAA	TGT	TAA	TAA	Wolbachia sp. subsp. Drosophila simulans (strain wRi)						Wolbachia	Rickettsiales
GAGA-0087.Scaffold9.6358492-6360227	GAGA-0087	Myrmica scabrinodis	Myrmicinae	Ankyrin 3 (Ankyrin repeat family protein)	Wolbachia	Rickettsiales	Alphaproteobacteria	Scaffold9	6358492-6360227	Scaffold9:6358492-6360227	6358492	6360227	1735	27	29	25	ankyrin_homolog_x000D__x000D_ ankyrin_repeat_protein	2	6358492	6358478	6359317	6359317	825	839	266	266	Q4EBI3	COG:COG0666:ANKYR Ankyrin repeat [Category:T%2C Aligned:54-239%2C Eval:4.5e-19%2C score:81.0],MGA_1	TIGR:TIGR00870%3B trp: transient-receptor-potential calcium channel protein [Name:TIGR00870%2C Eval:1.7e-25%2C score:87.1%2C bias:8.4],COG:COG0666:ANKYR Ankyrin repeat [Category:T%2C Aligned:54-239%2C Eval:4.5e-19%2C score:81.0],MGA_1	59.6	59.6	98.9	97.1	43.9	43.9	6.9e-82	7.1e-82	TAA	ATG	TAA	TAA	Wolbachia endosymbiont of Drosophila ananassae						Wolbachia	Rickettsiales
GAGA-0087.Scaffold9.6358492-6360227	GAGA-0087	Myrmica scabrinodis	Myrmicinae	Ankyrin 3 (Ankyrin repeat family protein)	Wolbachia	Rickettsiales	Alphaproteobacteria	Scaffold9	6358492-6360227	Scaffold9:6358492-6360227	6358492	6360227	1735	27	29	25	ankyrin_homolog_x000D__x000D_ ankyrin_repeat_protein	2	6359879	6359879	6360227	6360865	348	986	161	226	Q4EBI3	COG:COG0666:ANKYR Ankyrin repeat [Category:T%2C Aligned:9-116%2C Eval:2.7e-08%2C score:47.1%2C N-term missing],MGA_2		69.0	41.2	100.0	96.3	18.8	88.5	5.4e-40		GTG	GTG	AGC	TGA	Wolbachia endosymbiont of Drosophila ananassae						Wolbachia	Rickettsiales
GAGA-0098.Scaffold13.1812535-1819990	GAGA-0098	Harpagoxenus sublaevis	Myrmicinae	Ankyrin repeat domain protein	Wolbachia	Rickettsiales	Alphaproteobacteria	Scaffold13	1812535-1819990	Scaffold13:1812535-1819990	1812535	1819990	7455	22	28	3	ankyrin repeat protein	1	1812699	1812699	1819976	1819976	7277	7277	724	724	C0R3E9	COG:COG0666:ANKYR Ankyrin repeat [Category:T%2C Aligned:1489-1680%2C Eval:1.2e-19%2C score:87.6],COG:COG0666:ANKYR Ankyrin repeat [Category:T%2C Aligned:1059-1245%2C Eval:4.8e-18%2C score:82.9],COG:COG0666:ANKYR Ankyrin repeat [Category:T%2C Aligned:892-1111%2C Eval:9.0e-18%2C score:82.2],COG:COG0666:ANKYR Ankyrin repeat [Category:T%2C Aligned:1153-1368%2C Eval:1.8e-17%2C score:81.4],COG:COG0666:…		75.4	75.4	100.0	100.0	97.9	97.9			ATG	ATG	TAA	TAA	Wolbachia sp. subsp. Drosophila simulans (strain wRi)						Wolbachia	Rickettsiales
GAGA-0098.Scaffold31.1152742-1153911	GAGA-0098	Harpagoxenus sublaevis	Myrmicinae	DUF1016 family protein	Wolbachia	Rickettsiales	Alphaproteobacteria	Scaffold31	1152742-1153911	Scaffold31:1152742-1153911	1152742	1153911	1169	17	25	15	Lysozyme_M1	1	1153305	1153305	1153911	1153928	606	623	116	117	A0A6H2NU06			79.9	79.9	98.5	96.1	36.0	36.0	2.5e-93	2.7e-93	ATG	ATG	CAA	TAA	Wolbachia pipientis	GO:0003676; GO:0003796; GO:0004518; GO:0009253; GO:0016998	lysozyme activity [GO:0003796]; nuclease activity [GO:0004518]; nucleic acid binding [GO:0003676]; cell wall macromolecule catabolic process [GO:0016998]; peptidoglycan catabolic process [GO:0009253]	cell wall macromolecule catabolic process [GO:0016998]; peptidoglycan catabolic process [GO:0009253]	lysozyme activity [GO:0003796]; nuclease activity [GO:0004518]; nucleic acid binding [GO:0003676]		Wolbachia	Rickettsiales
GAGA-0098.Scaffold75.614148-622481	GAGA-0098	Harpagoxenus sublaevis	Myrmicinae	Uncharacterized ANK	Wolbachia_x000D__x000D_ Ehrlichia_sp.	Rickettsiales	Alphaproteobacteria	Scaffold75	614148-622481	Scaffold75:614148-622481	614148	622481	8333	16	15	5	ankyrin_repeat_protein_x000D__x000D_ ATP-dependent RNA helicase	2	614148	614100	616670	616670	2522	2570	4	4	A0A176Q8J2	COG:COG0666:ANKYR Ankyrin repeat [Category:T%2C Aligned:336-554%2C Eval:3.1e-16%2C score:76.0],COG:COG0666:ANKYR Ankyrin repeat [Category:T%2C Aligned:19-158%2C Eval:7.7e-16%2C score:74.9%2C N-term missing],COG:COG0666:ANKYR Ankyrin repeat [Category:T%2C Aligned:109-275%2C Eval:5.0e-15%2C score:72.5%2C N-term missing],COG:COG0666:ANKYR Ankyrin repeat [Category:T%2C Aligned:530-712%2C Eval:3.4e-08…		69.6	69.6	97.9	96.0	98.4	98.4			TCT	ATG	TAA	TAA	Wolbachia endosymbiont of Laodelphax striatellus						Wolbachia	Rickettsiales
GAGA-0098.Scaffold75.614148-622481	GAGA-0098	Harpagoxenus sublaevis	Myrmicinae		Wolbachia_x000D__x000D_ Ehrlichia_sp.	Rickettsiales	Alphaproteobacteria	Scaffold75	614148-622481	Scaffold75:614148-622481	614148	622481	8333	16	15	5	ankyrin_repeat_protein_x000D__x000D_ ATP-dependent RNA helicase	2	617777	617777	618184	618184	407	407	0	0												GTG	GTG	TAA	TAA
GAGA-0098.Scaffold8.1328058-1329239	GAGA-0098	Harpagoxenus sublaevis	Myrmicinae	D-alanine--D-alanine ligase (EC 6.3.2.4) (D-Ala-D-Ala ligase) (D-alanylalanine synthetase)	Sodalis_praecaptivus	Enterobacterales	Gammaproteobacteria	Scaffold8	1328058-1329239	Scaffold8:1328058-1329239	1328058	1329239	1181	27	28	21	D-alanine-ligase_A	1	1328122	1328200	1329239	1329240	1117	1040	132	128	W0HVG4	COG:COG1181:DdlA D-alanine-D-alanine ligase and related ATP-grasp enzymes [Category:MR%2C Aligned:8-358%2C Eval:1.4e-111%2C score:325.8],MGA_1		76.1	75.4	98.9	100.0	99.2	93.2			ATG	TTG	CTA	TAA	Sodalis praecaptivus	GO:0005524; GO:0005737; GO:0008360; GO:0008716; GO:0009252; GO:0046872; GO:0071555	cytoplasm [GO:0005737]; ATP binding [GO:0005524]; D-alanine-D-alanine ligase activity [GO:0008716]; metal ion binding [GO:0046872]; cell wall organization [GO:0071555]; peptidoglycan biosynthetic process [GO:0009252]; regulation of cell shape [GO:0008360]	cell wall organization [GO:0071555]; peptidoglycan biosynthetic process [GO:0009252]; regulation of cell shape [GO:0008360]	ATP binding [GO:0005524]; D-alanine-D-alanine ligase activity [GO:0008716]; metal ion binding [GO:0046872]	cytoplasm [GO:0005737]	cellular organisms, Bacteria, Proteobacteria, Gammaproteobacteria, Enterobacterales, Bruguierivoracaceae, Sodalis (tsetse S-endosymbionts), Sodalis praecaptivus	Enterobacterales
GAGA-0099.Scaffold142.246089-249676	GAGA-0099	Leptothorax acervorum	Myrmicinae	DEAD/DEAH box helicase	Wolbachia	Rickettsiales	Alphaproteobacteria	Scaffold142	246089-249676	Scaffold142:246089-249676	246089	249676	3587	49	40	26	Phosphocholine_transferase_AnkX_x000D__x000D_ DEAD-box_ATP-dependent_RNA_helicase_CshE_x000D__x000D_ ATP-dependent RNA helicase RhlB	4	249538	246246	249676	247175	138	929	4	32	A0A7Z3DYY9			68.9	47.2	100.0	97.7	10.9	38.7	5.9e-07	4.6e-75	CAA	TTG	TAA	TAA	Wolbachia endosymbiont of Dirofilaria (Dirofilaria) immitis	GO:0004386	helicase activity [GO:0004386]		helicase activity [GO:0004386]		Wolbachia	Rickettsiales
GAGA-0099.Scaffold142.246089-249676	GAGA-0099	Leptothorax acervorum	Myrmicinae	Uncharacterized ANK	Wolbachia	Rickettsiales	Alphaproteobacteria	Scaffold142	246089-249676	Scaffold142:246089-249676	246089	249676	3587	49	40	26	Phosphocholine_transferase_AnkX_x000D__x000D_ DEAD-box_ATP-dependent_RNA_helicase_CshE_x000D__x000D_ ATP-dependent RNA helicase RhlB	4	246246	246246	247175	247175	929	929	32	32	A0A176Q8J2	COG:COG0666:ANKYR Ankyrin repeat [Category:T%2C Aligned:10-223%2C Eval:1.6e-09%2C score:54.4%2C N-term missing],MGA_2	TIGR:TIGR00870%3B trp: transient-receptor-potential calcium channel protein [Name:TIGR00870%2C Eval:6.8e-11%2C score:38.9%2C bias:2.8],COG:COG0666:ANKYR Ankyrin repeat [Category:T%2C Aligned:10-223%2C Eval:1.6e-09%2C score:54.4%2C N-term missing],MGA_2	47.2	47.2	97.7	97.7	38.7	38.7	4.6e-75	4.6e-75	TTG	TTG	TAA	TAA	Wolbachia endosymbiont of Laodelphax striatellus						Wolbachia	Rickettsiales
GAGA-0099.Scaffold142.246089-249676	GAGA-0099	Leptothorax acervorum	Myrmicinae	Uncharacterized protein	Wolbachia	Rickettsiales	Alphaproteobacteria	Scaffold142	246089-249676	Scaffold142:246089-249676	246089	249676	3587	49	40	26	Phosphocholine_transferase_AnkX_x000D__x000D_ DEAD-box_ATP-dependent_RNA_helicase_CshE_x000D__x000D_ ATP-dependent RNA helicase RhlB	4	248044	246246	248334	247175	290	929	14	32	A0A225X8B4			66.0	47.2	55.2	97.7	12.7	38.7	5.4e-08	4.6e-75	ATG	TTG	TAG	TAA	Wolbachia endosymbiont of Wuchereria bancrofti	GO:0003676; GO:0003724; GO:0005524; GO:0016787	ATP binding [GO:0005524]; hydrolase activity [GO:0016787]; nucleic acid binding [GO:0003676]; RNA helicase activity [GO:0003724]		ATP binding [GO:0005524]; hydrolase activity [GO:0016787]; nucleic acid binding [GO:0003676]; RNA helicase activity [GO:0003724]		Wolbachia	Rickettsiales
GAGA-0099.Scaffold142.246089-249676	GAGA-0099	Leptothorax acervorum	Myrmicinae		Wolbachia	Rickettsiales	Alphaproteobacteria	Scaffold142	246089-249676	Scaffold142:246089-249676	246089	249676	3587	49	40	26	Phosphocholine_transferase_AnkX_x000D__x000D_ DEAD-box_ATP-dependent_RNA_helicase_CshE_x000D__x000D_ ATP-dependent RNA helicase RhlB	4	246089	246246	246177	247175	88	929	0	32					47.2		97.7		38.7		4.6e-75	GTA	TTG	TAG	TAA
GAGA-0099.Scaffold15.2285014-2297549	GAGA-0099	Leptothorax acervorum	Myrmicinae	Ankyrin repeat domain protein	Wolbachia	Rickettsiales	Alphaproteobacteria	Scaffold15	2285014-2297549	Scaffold15:2285014-2297549	2285014	2297549	12535	23	31	3	DEAD-box_ATP-dependent_RNA_helicase_x000D__x000D_ ankyrin repeat protein_x000D__x000D_ Phosphocholine transferase AnkX	2	2290109	2290109	2290408	2290408	299	299	69	69	C0R3E9			75.5	75.5	99.0	99.0	4.0	4.0	6.2e-36	6.2e-36	TTG	TTG	TAA	TAA	Wolbachia sp. subsp. Drosophila simulans (strain wRi)						Wolbachia	Rickettsiales
GAGA-0099.Scaffold15.2285014-2297549	GAGA-0099	Leptothorax acervorum	Myrmicinae		Wolbachia	Rickettsiales	Alphaproteobacteria	Scaffold15	2285014-2297549	Scaffold15:2285014-2297549	2285014	2297549	12535	23	31	3	DEAD-box_ATP-dependent_RNA_helicase_x000D__x000D_ ankyrin repeat protein_x000D__x000D_ Phosphocholine transferase AnkX	2	2285836	2285836	2285908	2285908	72	72	0	0
GAGA-0099.Scaffold15.2285014-2297549	GAGA-0099	Leptothorax acervorum	Myrmicinae		Wolbachia	Rickettsiales	Alphaproteobacteria	Scaffold15	2285014-2297549	Scaffold15:2285014-2297549	2285014	2297549	12535	23	31	3	DEAD-box_ATP-dependent_RNA_helicase_x000D__x000D_ ankyrin repeat protein_x000D__x000D_ Phosphocholine transferase AnkX	2	2286249	2286249	2286321	2286321	72	72	0	0
GAGA-0099.Scaffold15.2285014-2297549	GAGA-0099	Leptothorax acervorum	Myrmicinae	Ankyrin repeat domain protein	Wolbachia	Rickettsiales	Alphaproteobacteria	Scaffold15	2285014-2297549	Scaffold15:2285014-2297549	2285014	2297549	12535	23	31	3	DEAD-box_ATP-dependent_RNA_helicase_x000D__x000D_ ankyrin repeat protein_x000D__x000D_ Phosphocholine transferase AnkX	2	2290723	2290723	2297385	2297385	6662	6662	1859	1859	C0R3E9	COG:COG0666:ANKYR Ankyrin repeat [Category:T%2C Aligned:1059-1243%2C Eval:2.4e-18%2C score:83.7],COG:COG0666:ANKYR Ankyrin repeat [Category:T%2C Aligned:892-1111%2C Eval:2.7e-18%2C score:83.7],COG:COG0666:ANKYR Ankyrin repeat [Category:T%2C Aligned:1153-1368%2C Eval:1.4e-17%2C score:81.4],COG:COG0666:ANKYR Ankyrin repeat [Category:T%2C Aligned:1489-1676%2C Eval:2.4e-15%2C score:74.9],COG:COG0666:…		73.6	73.6	99.4	99.4	89.0	89.0			ATG	ATG	TAA	TAA	Wolbachia sp. subsp. Drosophila simulans (strain wRi)						Wolbachia	Rickettsiales
GAGA-0099.Scaffold20.2658162-2659328	GAGA-0099	Leptothorax acervorum	Myrmicinae	DUF1016 family protein	Wolbachia	Rickettsiales	Alphaproteobacteria	Scaffold20	2658162-2659328	Scaffold20:2658162-2659328	2658162	2659328	1166	26	30	22	Autolytic_lysozyme	1	2658162	2658144	2658767	2658767	605	623	365	378	A0A6H2NU06			79.4	79.4	98.5	96.1	36.0	36.0	1.1e-91	1.1e-91	ATG	ATG	TCA	TAA	Wolbachia pipientis	GO:0003676; GO:0003796; GO:0004518; GO:0009253; GO:0016998	lysozyme activity [GO:0003796]; nuclease activity [GO:0004518]; nucleic acid binding [GO:0003676]; cell wall macromolecule catabolic process [GO:0016998]; peptidoglycan catabolic process [GO:0009253]	cell wall macromolecule catabolic process [GO:0016998]; peptidoglycan catabolic process [GO:0009253]	lysozyme activity [GO:0003796]; nuclease activity [GO:0004518]; nucleic acid binding [GO:0003676]		Wolbachia	Rickettsiales
GAGA-0099.Scaffold4.5620327-5620504	GAGA-0099	Leptothorax acervorum	Myrmicinae	AAA-ATPase_like domain-containing protein	Cardinium_endosymbiont	Sphingobacteriales	Sphingobacteriia	Scaffold4	5620327-5620504	Scaffold4:5620327-5620504	5620327	5620504	177	35	37	33	Uncharacterized_protein_in_vnfD_5'region	1	5620327	5620285	5620504	5620542	177	257	0	0	A0A556QVC9			88.1	80.8	100.0	85.9	20.2	24.0	3.9e-22	8.3e-25	TTA	GTG	AGT	TGA	Cardinium endosymbiont of Dermatophagoides farinae						Amoebophilaceae	Bacteroidetes
GAGA-0099.Scaffold4.5794430-5794610	GAGA-0099	Leptothorax acervorum	Myrmicinae	AAA-ATPase_like domain-containing protein	Cardinium_endosymbiont	Sphingobacteriales	Sphingobacteriia	Scaffold4	5794430-5794610	Scaffold4:5794430-5794610	5794430	5794610	180	35	34	34	Uncharacterized_protein_in_vnfD_5'region	1	5794430		5794610		180		0		A0A556QVC9			86.7		100.0		20.5		2.3e-22		TTA		ATA		Cardinium endosymbiont of Dermatophagoides farinae						Amoebophilaceae	Bacteroidetes
GAGA-0103.Scaffold1038.10998-14465	GAGA-0103	Myrmecina graminicola	Myrmicinae	Transposase	Wolbachia	Rickettsiales	Alphaproteobacteria	Scaffold1038	10998-14465	Scaffold1038:10998-14465	10998	14465	3467	47	19	0	hypothetical protein	4	11211	11316	11930	11930	719	614	0	0	A0A178GYM1			80.2	76.6	96.7	96.1	75.8	64.4		7.3e-80	ATG	TTG	TAA	TAA	Wolbachia endosymbiont of Dactylopius coccus						Wolbachia	Rickettsiales
GAGA-0103.Scaffold1038.10998-14465	GAGA-0103	Myrmecina graminicola	Myrmicinae		Wolbachia	Rickettsiales	Alphaproteobacteria	Scaffold1038	10998-14465	Scaffold1038:10998-14465	10998	14465	3467	47	19	0	hypothetical protein	4	13090	13090	13410	13410	320	320	0	0												ATG	ATG	TGA	TGA
GAGA-0103.Scaffold1038.10998-14465	GAGA-0103	Myrmecina graminicola	Myrmicinae		Wolbachia	Rickettsiales	Alphaproteobacteria	Scaffold1038	10998-14465	Scaffold1038:10998-14465	10998	14465	3467	47	19	0	hypothetical protein	4	13577	13577	13786	13786	209	209	0	0												ATG	ATG	TAA	TAA
GAGA-0103.Scaffold1038.10998-14465	GAGA-0103	Myrmecina graminicola	Myrmicinae		Wolbachia	Rickettsiales	Alphaproteobacteria	Scaffold1038	10998-14465	Scaffold1038:10998-14465	10998	14465	3467	47	19	0	hypothetical protein	4	14298	14298	14465	14543	167	245	0	0												ATG	ATG	GCA	TAG
GAGA-0103.Scaffold21.2727980-2731770	GAGA-0103	Myrmecina graminicola	Myrmicinae	Uncharacterized protein	Wolbachia	Rickettsiales	Alphaproteobacteria	Scaffold21	2727980-2731770	Scaffold21:2727980-2731770	2727980	2731770	3790	37	33	30	Ribosomal_RNA_large_subunit_methyltransferase	3	2730505	2730505	2731485	2731485	980	980	2519	2701	A0A369RI01			61.3	61.3	97.9	97.9	71.4	71.4	6.9e-101	6.9e-101	ATG	ATG	TAA	TAA	Wolbachia endosymbiont of Cylisticus convexus						Wolbachia	Rickettsiales
GAGA-0103.Scaffold21.2727980-2731770	GAGA-0103	Myrmecina graminicola	Myrmicinae		Wolbachia	Rickettsiales	Alphaproteobacteria	Scaffold21	2727980-2731770	Scaffold21:2727980-2731770	2727980	2731770	3790	37	33	30	Ribosomal_RNA_large_subunit_methyltransferase	3	2727980	2730505	2728111	2731485	131	980	759	2701					61.3		97.9		71.4		6.9e-101	ACT	ATG	TGA	TAA
GAGA-0103.Scaffold21.2727980-2731770	GAGA-0103	Myrmecina graminicola	Myrmicinae		Wolbachia	Rickettsiales	Alphaproteobacteria	Scaffold21	2727980-2731770	Scaffold21:2727980-2731770	2727980	2731770	3790	37	33	30	Ribosomal_RNA_large_subunit_methyltransferase	3	2730261	2730505	2730443	2731485	182	980	514	2701					61.3		97.9		71.4		6.9e-101	GTG	ATG	TGA	TAA
GAGA-0103.Scaffold3.176889-177498	GAGA-0103	Myrmecina graminicola	Myrmicinae	DUF1016 family protein	Wolbachia	Rickettsiales	Alphaproteobacteria	Scaffold3	176889-177498	Scaffold3:176889-177498	176889	177498	609	19	19	17	Autolytic_lysozyme	1	176889	176889	177498	177503	609	614	400	400	A0A6H2NU06			75.9	75.9	98.0	97.5	36.0	36.0	2.6e-90	2.7e-90	ATG	ATG	GAA	TGA	Wolbachia pipientis	GO:0003676; GO:0003796; GO:0004518; GO:0009253; GO:0016998	lysozyme activity [GO:0003796]; nuclease activity [GO:0004518]; nucleic acid binding [GO:0003676]; cell wall macromolecule catabolic process [GO:0016998]; peptidoglycan catabolic process [GO:0009253]	cell wall macromolecule catabolic process [GO:0016998]; peptidoglycan catabolic process [GO:0009253]	lysozyme activity [GO:0003796]; nuclease activity [GO:0004518]; nucleic acid binding [GO:0003676]		Wolbachia	Rickettsiales
GAGA-0103.Scaffold3.2187494-2193081	GAGA-0103	Myrmecina graminicola	Myrmicinae	IS4-like element ISWen1 family transposase	Wolbachia	Rickettsiales	Alphaproteobacteria	Scaffold3	2187494-2193081	Scaffold3:2187494-2193081	2187494	2193081	5587	58	19	10	Transposase_for_insertion_sequence_element_x000D__x000D_ ankyrin repeat protein	5	2189148	2189148	2189306	2189306	158	158	2281	2281	A0A7G5C9F0			75.6	75.6	86.5	86.5	10.2	10.2	6.2e-12	6.2e-12	ATG	ATG	TAG	TAG	Wolbachia pipientis	GO:0003677; GO:0004803; GO:0006313	DNA binding [GO:0003677]; transposase activity [GO:0004803]; transposition, DNA-mediated [GO:0006313]	transposition, DNA-mediated [GO:0006313]	DNA binding [GO:0003677]; transposase activity [GO:0004803]		Wolbachia	Rickettsiales
GAGA-0103.Scaffold3.2187494-2193081	GAGA-0103	Myrmecina graminicola	Myrmicinae	Mutator family transposase	Wolbachia	Rickettsiales	Alphaproteobacteria	Scaffold3	2187494-2193081	Scaffold3:2187494-2193081	2187494	2193081	5587	58	19	10	Transposase_for_insertion_sequence_element_x000D__x000D_ ankyrin repeat protein	5	2187964	2187964	2188269	2188269	305	305	6309	6309	A0A0U1D8X4			91.4	91.4	56.4	56.4	14.1	14.1	2.4e-19	2.4e-19	ATG	ATG	TAG	TAG	Wolbachia endosymbiont wPip_Mol of Culex molestus	GO:0003677; GO:0004803; GO:0006313	DNA binding [GO:0003677]; transposase activity [GO:0004803]; transposition, DNA-mediated [GO:0006313]	transposition, DNA-mediated [GO:0006313]	DNA binding [GO:0003677]; transposase activity [GO:0004803]		Wolbachia	Rickettsiales
GAGA-0103.Scaffold3.2187494-2193081	GAGA-0103	Myrmecina graminicola	Myrmicinae	Transposase	Wolbachia	Rickettsiales	Alphaproteobacteria	Scaffold3	2187494-2193081	Scaffold3:2187494-2193081	2187494	2193081	5587	58	19	10	Transposase_for_insertion_sequence_element_x000D__x000D_ ankyrin repeat protein	5	2190064	2190064	2190315	2190315	251	251	1829	1829	D9ZZE4			82.6	82.6	83.1	83.1	15.6	15.6	4.9e-25	4.9e-25	TTG	TTG	TGA	TGA	Wolbachia endosymbiont of Lissorhoptrus oryzophilus	GO:0003677; GO:0004803; GO:0006313	DNA binding [GO:0003677]; transposase activity [GO:0004803]; transposition, DNA-mediated [GO:0006313]	transposition, DNA-mediated [GO:0006313]	DNA binding [GO:0003677]; transposase activity [GO:0004803]		Wolbachia	Rickettsiales
GAGA-0103.Scaffold3.2187494-2193081	GAGA-0103	Myrmecina graminicola	Myrmicinae		Wolbachia	Rickettsiales	Alphaproteobacteria	Scaffold3	2187494-2193081	Scaffold3:2187494-2193081	2187494	2193081	5587	58	19	10	Transposase_for_insertion_sequence_element_x000D__x000D_ ankyrin repeat protein	5	2187657	2187657	2187779	2187779	122	122	2984	2984												ATG	ATG	TAA	TAA
GAGA-0103.Scaffold3.2187494-2193081	GAGA-0103	Myrmecina graminicola	Myrmicinae	Ankyrin repeat protein	Wolbachia	Rickettsiales	Alphaproteobacteria	Scaffold3	2187494-2193081	Scaffold3:2187494-2193081	2187494	2193081	5587	58	19	10	Transposase_for_insertion_sequence_element_x000D__x000D_ ankyrin repeat protein	5	2190513	2190513	2193029	2193029	2516	2516	7090	7090	E9P653	COG:COG0666:ANKYR Ankyrin repeat [Category:T%2C Aligned:52-203%2C Eval:1.2e-20%2C score:89.1%2C N-term missing],COG:COG0666:ANKYR Ankyrin repeat [Category:T%2C Aligned:352-537%2C Eval:4.8e-15%2C score:72.5],COG:COG0666:ANKYR Ankyrin repeat [Category:T%2C Aligned:182-362%2C Eval:1.8e-10%2C score:59.1],MGA_5		68.4	68.4	99.0	99.0	88.1	88.1			ATG	ATG	TAA	TAA	Wolbachia endosymbiont wVitB of Nasonia vitripennis phage WOVitB						unclassified Myoviridae	Caudoviricetes
[truncated: 832 more rows]
[truncated: 1 more columns]
