# Supplementary material for: Recurrent horizontal gene acquisition in the evolutionary history of ants
Source: Research Square preprint supplement (doi:10.21203/rs.3.rs-5741203/v1), 2025-01-13
Supplement: Supplementary file 3 [file 27735a1c0685b146bfde8b41.xlsx]

## Sheet: Tabelle1
GAGA_id	species_name	overlap_HGT_locus_id_current_study	gene_id in previous studies	mRNA_ID	gene_name/function	CDS_length	Number_of_introns	Reference	pubulished_journal	doi	Comment for inferrence of possible HGAs in this study from previous reports
GAGA-0014	Acromyrmex_echinatior	NA	LOC105147508	XM_011058570.1	methylated-DNA--protein-cysteine methyltransferase	582 bp	0	Li et al. (2022)	Cell	10.1016/j.cell.2022.06.014	sequence identified in GAGA genome by blast, but not assigned as bacterial HGT
GAGA-0245	Monomorium_pharaonis	NA	LOC105831432	XM_012671558.3	bifunctional transcriptional activator/DNA repair enzyme Ada	567	2	Li et al. (2022)	Cell	10.1016/j.cell.2022.06.026	sequence identified in GAGA genome by blast, but not assigned as bacterial HGT
GAGA-0341	Nylanderia_fulva	WITHDRAWN BY NCBI	LOC114942128	WITHDRAWN	WITHDRAWN	1215	0	Li et al. (2022)	Cell	10.1016/j.cell.2022.06.027	WIITHDRAWN BY NCBI
GAGA-0341	Nylanderia_fulva	NA	LOC114932105	XM_029304286.1	methylated-DNA--protein-cysteine methyltransferase	708	1	Li et al. (2022)	Cell	10.1016/j.cell.2022.06.039	sequence identified in GAGA genome by blast, but not assigned as bacterial HGT
GAGA-0341	Nylanderia_fulva	NA	LOC114937329	XM_029310754.1	zinc finger C2H2 protein ECU06_1150-like	504	0	Li et al. (2022)	Cell	10.1016/j.cell.2022.06.050	sequence identified in GAGA genome by blast, but not assigned as bacterial HGT
GAGA-0341	Nylanderia_fulva	GAGA-0341.Scaffold63-76476-76612;GAGA-0341.Scaffold63-77564-77695	LOC114937338	XM_029310762.1	transketolase 1-like	2202	1	Li et al. (2022)	Cell	10.1016/j.cell.2022.06.054	sequence identified by HGT finder pipeline, but not assigned as HQ HGT candidate
GAGA-0341	Nylanderia_fulva	NA	LOC114937831	XM_029311493.1	uncharacterized protein y4hQ-like	618	4	Li et al. (2022)	Cell	10.1016/j.cell.2022.06.073	sequence identified in GAGA genome by blast, but not assigned as bacterial HGT
GAGA-0341	Nylanderia_fulva	WITHDRAWN BY NCBI	LOC114930129	WITHDRAWN	WITHDRAWN	1488	0	Li et al. (2022)	Cell	10.1016/j.cell.2022.06.028	WIITHDRAWN BY NCBI
GAGA-0341	Nylanderia_fulva	WITHDRAWN BY NCBI	LOC114946271	WITHDRAWN	WITHDRAWN	1476	0	Li et al. (2022)	Cell	10.1016/j.cell.2022.06.029	WIITHDRAWN BY NCBI
GAGA-0341	Nylanderia_fulva	WITHDRAWN BY NCBI	LOC114936618	WITHDRAWN	WITHDRAWN	1149	0	Li et al. (2022)	Cell	10.1016/j.cell.2022.06.030	WIITHDRAWN BY NCBI
GAGA-0341	Nylanderia_fulva	WITHDRAWN BY NCBI	LOC114930426	WITHDRAWN	WITHDRAWN	1497	0	Li et al. (2022)	Cell	10.1016/j.cell.2022.06.031	WIITHDRAWN BY NCBI
GAGA-0341	Nylanderia_fulva	WITHDRAWN BY NCBI	LOC114930082	WITHDRAWN	WITHDRAWN	1395	0	Li et al. (2022)	Cell	10.1016/j.cell.2022.06.032	WIITHDRAWN BY NCBI
GAGA-0341	Nylanderia_fulva	WITHDRAWN BY NCBI	LOC114946300	WITHDRAWN	WITHDRAWN	1614	0	Li et al. (2022)	Cell	10.1016/j.cell.2022.06.033	WIITHDRAWN BY NCBI
GAGA-0341	Nylanderia_fulva	WITHDRAWN BY NCBI	LOC114943969	WITHDRAWN	WITHDRAWN	1200	0	Li et al. (2022)	Cell	10.1016/j.cell.2022.06.034	WIITHDRAWN BY NCBI
GAGA-0341	Nylanderia_fulva	WITHDRAWN BY NCBI	LOC114943963	WITHDRAWN	WITHDRAWN	807	0	Li et al. (2022)	Cell	10.1016/j.cell.2022.06.035	WIITHDRAWN BY NCBI
GAGA-0341	Nylanderia_fulva	WITHDRAWN BY NCBI	LOC114930092	WITHDRAWN	WITHDRAWN	2583	0	Li et al. (2022)	Cell	10.1016/j.cell.2022.06.036	WIITHDRAWN BY NCBI
GAGA-0341	Nylanderia_fulva	WITHDRAWN BY NCBI	LOC114929004	WITHDRAWN	WITHDRAWN	2583	0	Li et al. (2022)	Cell	10.1016/j.cell.2022.06.037	WIITHDRAWN BY NCBI
GAGA-0341	Nylanderia_fulva	WITHDRAWN BY NCBI	LOC114943954	WITHDRAWN	WITHDRAWN	1200	0	Li et al. (2022)	Cell	10.1016/j.cell.2022.06.038	WIITHDRAWN BY NCBI
GAGA-0341	Nylanderia_fulva	WITHDRAWN BY NCBI	LOC114928992	WITHDRAWN	WITHDRAWN	1293	1	Li et al. (2022)	Cell	10.1016/j.cell.2022.06.040	WIITHDRAWN BY NCBI
GAGA-0341	Nylanderia_fulva	WITHDRAWN BY NCBI	LOC114928159	WITHDRAWN	WITHDRAWN	948	1	Li et al. (2022)	Cell	10.1016/j.cell.2022.06.041	WIITHDRAWN BY NCBI
GAGA-0341	Nylanderia_fulva	WITHDRAWN BY NCBI	LOC114929432	WITHDRAWN	WITHDRAWN	1392	0	Li et al. (2022)	Cell	10.1016/j.cell.2022.06.042	WIITHDRAWN BY NCBI
GAGA-0341	Nylanderia_fulva	WITHDRAWN BY NCBI	LOC114930425	WITHDRAWN	WITHDRAWN	720	0	Li et al. (2022)	Cell	10.1016/j.cell.2022.06.043	WIITHDRAWN BY NCBI
GAGA-0341	Nylanderia_fulva	WITHDRAWN BY NCBI	LOC114943962	WITHDRAWN	WITHDRAWN	606	0	Li et al. (2022)	Cell	10.1016/j.cell.2022.06.044	WIITHDRAWN BY NCBI
GAGA-0341	Nylanderia_fulva	WITHDRAWN BY NCBI	LOC114943936	WITHDRAWN	WITHDRAWN	606	0	Li et al. (2022)	Cell	10.1016/j.cell.2022.06.045	WIITHDRAWN BY NCBI
GAGA-0341	Nylanderia_fulva	WITHDRAWN BY NCBI	LOC114943938	WITHDRAWN	WITHDRAWN	606	0	Li et al. (2022)	Cell	10.1016/j.cell.2022.06.046	WIITHDRAWN BY NCBI
GAGA-0341	Nylanderia_fulva	WITHDRAWN BY NCBI	LOC114929020	WITHDRAWN	WITHDRAWN	1647	3	Li et al. (2022)	Cell	10.1016/j.cell.2022.06.047	WIITHDRAWN BY NCBI
GAGA-0341	Nylanderia_fulva	WITHDRAWN BY NCBI	LOC114929025	WITHDRAWN	WITHDRAWN	1035	2	Li et al. (2022)	Cell	10.1016/j.cell.2022.06.048	WIITHDRAWN BY NCBI
GAGA-0341	Nylanderia_fulva	WITHDRAWN BY NCBI	LOC114928197	WITHDRAWN	WITHDRAWN	504	0	Li et al. (2022)	Cell	10.1016/j.cell.2022.06.049	WIITHDRAWN BY NCBI
GAGA-0341	Nylanderia_fulva	WITHDRAWN BY NCBI	LOC114938533	WITHDRAWN	WITHDRAWN	1041	0	Li et al. (2022)	Cell	10.1016/j.cell.2022.06.051	WIITHDRAWN BY NCBI
GAGA-0341	Nylanderia_fulva	WITHDRAWN BY NCBI	LOC114939278	WITHDRAWN	WITHDRAWN	795	0	Li et al. (2022)	Cell	10.1016/j.cell.2022.06.052	WIITHDRAWN BY NCBI
GAGA-0341	Nylanderia_fulva	WITHDRAWN BY NCBI	LOC114929380	WITHDRAWN	WITHDRAWN	1950	0	Li et al. (2022)	Cell	10.1016/j.cell.2022.06.053	WIITHDRAWN BY NCBI
GAGA-0341	Nylanderia_fulva	WITHDRAWN BY NCBI	LOC114943923	WITHDRAWN	WITHDRAWN	1758	0	Li et al. (2022)	Cell	10.1016/j.cell.2022.06.055	WIITHDRAWN BY NCBI
GAGA-0341	Nylanderia_fulva	WITHDRAWN BY NCBI	LOC114943928	WITHDRAWN	WITHDRAWN	1758	0	Li et al. (2022)	Cell	10.1016/j.cell.2022.06.056	WIITHDRAWN BY NCBI
GAGA-0341	Nylanderia_fulva	WITHDRAWN BY NCBI	LOC114937190	WITHDRAWN	WITHDRAWN	504	0	Li et al. (2022)	Cell	10.1016/j.cell.2022.06.057	WIITHDRAWN BY NCBI
GAGA-0341	Nylanderia_fulva	WITHDRAWN BY NCBI	LOC114943930	WITHDRAWN	WITHDRAWN	828	0	Li et al. (2022)	Cell	10.1016/j.cell.2022.06.058	WIITHDRAWN BY NCBI
GAGA-0341	Nylanderia_fulva	WITHDRAWN BY NCBI	LOC114943886	WITHDRAWN	WITHDRAWN	699	0	Li et al. (2022)	Cell	10.1016/j.cell.2022.06.059	WIITHDRAWN BY NCBI
GAGA-0341	Nylanderia_fulva	WITHDRAWN BY NCBI	LOC114942124	WITHDRAWN	WITHDRAWN	528	0	Li et al. (2022)	Cell	10.1016/j.cell.2022.06.060	WIITHDRAWN BY NCBI
GAGA-0341	Nylanderia_fulva	WITHDRAWN BY NCBI	LOC114943912	WITHDRAWN	WITHDRAWN	1164	0	Li et al. (2022)	Cell	10.1016/j.cell.2022.06.061	WIITHDRAWN BY NCBI
GAGA-0341	Nylanderia_fulva	WITHDRAWN BY NCBI	LOC114930466	WITHDRAWN	WITHDRAWN	699	0	Li et al. (2022)	Cell	10.1016/j.cell.2022.06.062	WIITHDRAWN BY NCBI
GAGA-0341	Nylanderia_fulva	WITHDRAWN BY NCBI	LOC114929409	WITHDRAWN	WITHDRAWN	1554	0	Li et al. (2022)	Cell	10.1016/j.cell.2022.06.063	WIITHDRAWN BY NCBI
GAGA-0341	Nylanderia_fulva	WITHDRAWN BY NCBI	LOC114943871	WITHDRAWN	WITHDRAWN	774	0	Li et al. (2022)	Cell	10.1016/j.cell.2022.06.064	WIITHDRAWN BY NCBI
GAGA-0341	Nylanderia_fulva	WITHDRAWN BY NCBI	LOC114939469	WITHDRAWN	WITHDRAWN	1023	0	Li et al. (2022)	Cell	10.1016/j.cell.2022.06.065	WIITHDRAWN BY NCBI
GAGA-0341	Nylanderia_fulva	WITHDRAWN BY NCBI	LOC114943873	WITHDRAWN	WITHDRAWN	360	0	Li et al. (2022)	Cell	10.1016/j.cell.2022.06.066	WIITHDRAWN BY NCBI
GAGA-0341	Nylanderia_fulva	WITHDRAWN BY NCBI	LOC114933193	WITHDRAWN	WITHDRAWN	2037	0	Li et al. (2022)	Cell	10.1016/j.cell.2022.06.067	WIITHDRAWN BY NCBI
GAGA-0341	Nylanderia_fulva	WITHDRAWN BY NCBI	LOC114936621	WITHDRAWN	WITHDRAWN	504	0	Li et al. (2022)	Cell	10.1016/j.cell.2022.06.068	WIITHDRAWN BY NCBI
GAGA-0341	Nylanderia_fulva	WITHDRAWN BY NCBI	LOC114939465	WITHDRAWN	WITHDRAWN	504	0	Li et al. (2022)	Cell	10.1016/j.cell.2022.06.069	WIITHDRAWN BY NCBI
GAGA-0341	Nylanderia_fulva	WITHDRAWN BY NCBI	LOC114939301	WITHDRAWN	WITHDRAWN	447	0	Li et al. (2022)	Cell	10.1016/j.cell.2022.06.070	WIITHDRAWN BY NCBI
GAGA-0341	Nylanderia_fulva	WITHDRAWN BY NCBI	LOC114943888	WITHDRAWN	WITHDRAWN	3060	1	Li et al. (2022)	Cell	10.1016/j.cell.2022.06.071	WIITHDRAWN BY NCBI
GAGA-0341	Nylanderia_fulva	WITHDRAWN BY NCBI	LOC114946268	WITHDRAWN	WITHDRAWN	654	0	Li et al. (2022)	Cell	10.1016/j.cell.2022.06.072	WIITHDRAWN BY NCBI
GAGA-0341	Nylanderia_fulva	WITHDRAWN BY NCBI	LOC114943889	WITHDRAWN	WITHDRAWN	597	0	Li et al. (2022)	Cell	10.1016/j.cell.2022.06.074	WIITHDRAWN BY NCBI
GAGA-0341	Nylanderia_fulva	WITHDRAWN BY NCBI	LOC114939296	WITHDRAWN	WITHDRAWN	867	0	Li et al. (2022)	Cell	10.1016/j.cell.2022.06.075	WIITHDRAWN BY NCBI
GAGA-0341	Nylanderia_fulva	WITHDRAWN BY NCBI	LOC114939470	WITHDRAWN	WITHDRAWN	1020	2	Li et al. (2022)	Cell	10.1016/j.cell.2022.06.076	WIITHDRAWN BY NCBI
GAGA-0341	Nylanderia_fulva	WITHDRAWN BY NCBI	LOC114933176	WITHDRAWN	WITHDRAWN	1095	0	Li et al. (2022)	Cell	10.1016/j.cell.2022.06.077	WIITHDRAWN BY NCBI
GAGA-0515	Cardiocondyla_obscurior	GAGA-0515.Scaffold8.1760778-1761241	NA	NA	Xanthine-Guanine Phosphoribosyltransferase	505	0	Klein et al. (2016)	ISME		HQ_candidate
NA	Pseudomyrmex_gracilis	NA	LOC109858690	NA	uncharacterized LOC109858690	699	0	Li et al. (2022)	Cell	10.1016/j.cell.2022.06.083	Species not present in GAGA dataset
NA	Pseudomyrmex_gracilis	NA	LOC109857317	NA	methylated-DNA--protein-cysteine methyltransferase	597	0	Li et al. (2022)	Cell	10.1016/j.cell.2022.06.084	Species not present in GAGA dataset
NA	Temnothorax_curvispinosus	NA	LOC112459435	NA	lysozyme M1-like	735	3	Li et al. (2022)	Cell	10.1016/j.cell.2022.06.086	Species not present in GAGA dataset
NA	Temnothorax_curvispinosus	NA	LOC112463278	NA	methylated-DNA--protein-cysteine methyltransferase	615	2	Li et al. (2022)	Cell	10.1016/j.cell.2022.06.087	Species not present in GAGA dataset
NA	Temnothorax_longispinosus	NA	DBV15_01337	NA	M1 (1,4-beta-N-acetylmuramidase)	618	0	Li et al. (2022)	Cell	10.1016/j.cell.2022.06.088	Species not present in GAGA dataset
NA	Temnothorax_longispinosus	NA	DBV15_05982	NA	methylated-DNA--protein-cysteine methyltransferase	570	0	Li et al. (2022)	Cell	10.1016/j.cell.2022.06.089	Species not present in GAGA dataset
NA	Trachymyrmex_cornetzi	NA	LOC108770487	NA	UDP-N-acetylglucosamine 1-carboxyvinyltransferase-like	723	0	Li et al. (2022)	Cell	10.1016/j.cell.2022.06.090	Species not present in GAGA dataset
NA	Trachymyrmex_cornetzi	NA	LOC108760723	NA	methylated-DNA--protein-cysteine methyltransferase	582	0	Li et al. (2022)	Cell	10.1016/j.cell.2022.06.091	Species not present in GAGA dataset
NA	Trachymyrmex_cornetzi	NA	LOC108770488	NA	peptide chain release factor 2-like	405	2	Li et al. (2022)	Cell	10.1016/j.cell.2022.06.092	Species not present in GAGA dataset
NA	Trachymyrmex_cornetzi	NA	LOC108770495	NA	bifunctional protein PutA-like	2604	3	Li et al. (2022)	Cell	10.1016/j.cell.2022.06.093	Species not present in GAGA dataset
NA	Trachymyrmex_cornetzi	NA	LOC108770491	NA	porphobilinogen deaminase-like	588	1	Li et al. (2022)	Cell	10.1016/j.cell.2022.06.094	Species not present in GAGA dataset
NA	Trachymyrmex_cornetzi	NA	LOC108770489	NA	elongation factor 4-like	633	0	Li et al. (2022)	Cell	10.1016/j.cell.2022.06.095	Species not present in GAGA dataset
NA	Trachymyrmex_cornetzi	NA	LOC108770490	NA	uncharacterized protein RP006-like	2493	5	Li et al. (2022)	Cell	10.1016/j.cell.2022.06.096	Species not present in GAGA dataset
NA	Trachymyrmex_cornetzi	NA	LOC108770492	NA	flavin prenyltransferase UbiX-like	327	1	Li et al. (2022)	Cell	10.1016/j.cell.2022.06.097	Species not present in GAGA dataset
NA	Trachymyrmex_cornetzi	NA	LOC108770493	NA	ribosomal large subunit pseudouridine synthase C-like	732	1	Li et al. (2022)	Cell	10.1016/j.cell.2022.06.098	Species not present in GAGA dataset
NA	Trachymyrmex_zeteki	NA	LOC108728521	NA	methylated-DNA--protein-cysteine methyltransferase, constitutive	579	0	Li et al. (2022)	Cell	10.1016/j.cell.2022.06.100	Species not present in GAGA dataset
NCBI-0001	Ooceraea_biroi	NCBI-0001.NC_039519.1.0-58851	LOC113563412	XM_026975056.1	chaperone protein DnaJ 2-like	960	0	Li et al. (2022)	Cell	10.1016/j.cell.2022.06.079	sequence identified by HGT finder pipeline, but not assigned as HQ HGT candidate
NCBI-0001	Ooceraea_biroi	NCBI-0001.NC_039519.1.0-58851	LOC113563410	XM_026975054.1	cation-efflux pump FieF-like	942	0	Li et al. (2022)	Cell	10.1016/j.cell.2022.06.080	sequence identified by HGT finder pipeline, but not assigned as HQ HGT candidate
NCBI-0001	Ooceraea_biroi	NCBI-0001.NC_039519.1.0-58851	LOC113563411	XM_026975055.1	sensory transduction protein LytT-like	516	0	Li et al. (2022)	Cell	10.1016/j.cell.2022.06.081	sequence identified by HGT finder pipeline, but not assigned as HQ HGT candidate
NCBI-0001	Ooceraea_biroi	NCBI-0001.NC_039519.1.0-58851	LOC113563409	XM_026975053.1	uncharacterized protein Mb0911c-like	357	0	Li et al. (2022)	Cell	10.1016/j.cell.2022.06.082	sequence identified by HGT finder pipeline, but not assigned as HQ HGT candidate
NCBI-0002	Solenopsis_invicta	NA	LOC105206750	XM_011176220.3	bifunctional transcriptional activator/DNA repair enzyme Ada	573	0	Li et al. (2022)	Cell	10.1016/j.cell.2022.06.085	sequence identified in GAGA genome by blast, but not assigned as bacterial HGT
NCBI-0003	Atta_cephalotes	NA	LOC105619639	XM_012201160.1	methylated-DNA--protein-cysteine methyltransferase	582	0	Li et al. (2022)	Cell	10.1016/j.cell.2022.06.015	sequence identified in GAGA genome by blast, but not assigned as bacterial HGT
NCBI-0004	Atta_colombica	NA	LOC108688771	XM_018195170.1	methylated-DNA--protein-cysteine methyltransferase	582	0	Li et al. (2022)	Cell	10.1016/j.cell.2022.06.016	sequence identified in GAGA genome by blast, but not assigned as bacterial HGT
NCBI-0005	Camponotus_floridanus	NA	LOC105254737	XM_011263612.3	methylated-DNA--protein-cysteine methyltransferase	582	1	Li et al. (2022)	Cell	10.1016/j.cell.2022.06.017	sequence identified in GAGA genome by blast, but not assigned as bacterial HGT
NCBI-0005	Camponotus_floridanus	NCBI-0005.NW_020229769.1.103912-105724	LOC105248371	XM_025412978.1	N-acetylmuramic acid 6-phosphate etherase	789	1	Li et al. (2022)	Cell	10.1016/j.cell.2022.06.018	HQ_candidate
NCBI-0007	Dinoponera_quadriceps	NA	LOC106751857	XM_014633063.1	bifunctional transcriptional activator/DNA repair enzyme Ada	603	1	Li et al. (2022)	Cell	10.1016/j.cell.2022.06.019	sequence identified in GAGA genome by blast, but not assigned as bacterial HGT
NCBI-0008	Formica_exsecta	NA	scaffold233:1712452–1,725,498	NA	NA	NA	NA	Dhaygude et al. (2018)	BMC genomics	10.1186/s12864-019-5665-6	NA
NCBI-0008	Formica_exsecta	NA	scaffold574:102007–116,197	NA	NA	NA	NA	Dhaygude et al. (2018)	BMC genomics	10.1186/s12864-019-5665-6	NA
NCBI-0008	Formica_exsecta	NA	scaffold707:1–38,814	NA	NA	NA	NA	Dhaygude et al. (2018)	BMC genomics	10.1186/s12864-019-5665-6	NA
NCBI-0008	Formica_exsecta	NA	scaffold741:1–47,265	NA	NA	NA	NA	Dhaygude et al. (2018)	BMC genomics	10.1186/s12864-019-5665-6	NA
NCBI-0008	Formica_exsecta	NCBI-0008.NW_021848985.1.0-28604	LOC115233246	XM_029803555.1	cyclopropane-fatty-acyl-phospholipid synthase-like	1401	2	Li et al. (2022)	Cell	10.1016/j.cell.2022.06.019	sequence identified by HGT finder pipeline, but not assigned as HQ HGT candidate
NCBI-0008	Formica_exsecta	NA	LOC115239369	XM_029813853.1	methylated-DNA--protein-cysteine methyltransferase	558	5	Li et al. (2022)	Cell	10.1016/j.cell.2022.06.020	sequence identified in GAGA genome by blast, but not assigned as bacterial HGT
NCBI-0009	Harpegnathos_saltator	NA	LOC112588773	XM_025299709.1	AAA ATPase forming ring-shaped complexes-like	1167	0	Li et al. (2022)	Cell	10.1016/j.cell.2022.06.021	sequence identified in GAGA genome by blast, but not assigned as bacterial HGT
NCBI-0009	Harpegnathos_saltator	NA	LOC112589211	XM_025301563.1	fidgetin-like protein 1	1044	0	Li et al. (2022)	Cell	10.1016/j.cell.2022.06.022	sequence identified in GAGA genome by blast, but not assigned as bacterial HGT
NCBI-0009	Harpegnathos_saltator	NA	LOC112588772	XM_025299707.1	AAA ATPase forming ring-shaped complexes-like	1026	0	Li et al. (2022)	Cell	10.1016/j.cell.2022.06.023	sequence identified in GAGA genome by blast, but not assigned as bacterial HGT
NCBI-0009	Harpegnathos_saltator	NA	LOC105189983	XM_011152442.3	methylated-DNA--protein-cysteine methyltransferase	561	1	Li et al. (2022)	Cell	10.1016/j.cell.2022.06.024	sequence identified in GAGA genome by blast, but not assigned as bacterial HGT
NCBI-0010	Linepithema_humile	NA	LOC105667895	XM_012360010.2	methylated-DNA--protein-cysteine methyltransferase	570	0	Li et al. (2022)	Cell	10.1016/j.cell.2022.06.025	sequence identified in GAGA genome by blast, but not assigned as bacterial HGT
NCBI-0011	Odontomachus_brunneus	NA	LOC116841900	XM_032810367.1	bifunctional transcriptional activator/DNA repair enzyme Ada	561	1	Li et al. (2022)	Cell	10.1016/j.cell.2022.06.078	sequence identified in GAGA genome by blast, but not assigned as bacterial HGT
NCBI-0013	Vollenhovia_emeryi	NA	LOC105567628	XM_012022629.1	uncharacterized LOC105567628	579	0	Li et al. (2022)	Cell	10.1016/j.cell.2022.06.101	sequence identified in GAGA genome by blast, but not assigned as bacterial HGT
NCBI-0014	Wasmannia_auropunctata	NA	LOC105453072	XM_011694773.1	uncharacterized LOC105453072	612	1	Li et al. (2022)	Cell	10.1016/j.cell.2022.06.102	sequence identified in GAGA genome by blast, but not assigned as bacterial HGT
NCBI-0016	Trachymyrmex_septentrionalis	NA	LOC108755029	XM_018497738.1	methylated-DNA--protein-cysteine methyltransferase, constitutive	576	2	Li et al. (2022)	Cell	10.1016/j.cell.2022.06.099	sequence identified in GAGA genome by blast, but not assigned as bacterial HGT
