# Supplementary material for: Recurrent horizontal gene acquisition in the evolutionary history of ants
Source: Research Square preprint supplement (doi:10.21203/rs.3.rs-5741203/v1), 2025-01-13
Supplement: Supplementary file 4 [file 3ee6dfe7dbe2991f2cbb1473.xlsx]

## Sheet: CFAs_HGAs
locusID	.id	locus.scaffold	locus.position	species	subfamily	CDS.start	CDS.end	CDS.length	Expression	CDS.UniprotID	Protein.name	CDS.cogs	CDS.tigrs	CDS.pids	CDS.q_covs	CDS.s_covs	CDS.Eval	CDS.startCodons	CDS.stopCodons	detection
GAGA-0350.Scaffold105.254062-255279	GAGA-0350	Scaffold105	254062-255279	Formica cf. japonica	Formicinae	254123	255271	1148	270	A0A151ULI1	Cyclopropane fatty acyl phospholipid synthase	COG:COG2230:Cfa Cyclopropane fatty-acyl-phospholipid synthase and related methyltransferases [Category:I%2C Aligned:96-371%2C Eval:1.6e-123%2C score:355.4],MGA_1		77.0	100.0	100.0				All genomes BLAST search
GAGA-0350.Scaffold295.86215-87652	GAGA-0350	Scaffold295	86215-87652	Formica cf. japonica	Formicinae	86223	87371	1148	678	A0A151ULI1	Cyclopropane fatty acyl phospholipid synthase	COG:COG2230:Cfa Cyclopropane fatty-acyl-phospholipid synthase and related methyltransferases [Category:I%2C Aligned:96-371%2C Eval:2.5e-130%2C score:372.7],MGA_1		81.2	100.0	100.0				All genomes BLAST search
GAGA-0350.Scaffold295.86215-87652	GAGA-0350	Scaffold295	86215-87652	Formica cf. japonica	Formicinae	87582	87651	69	8	NA	hypothetical protein	NA	NA	NA	NA	NA	NA	NA	NA	All genomes BLAST search
GAGA-0350.Scaffold3.291594-292520	GAGA-0350	Scaffold3	291594-292520	Formica cf. japonica	Formicinae	291643	292519	876	8	A0A151ULI1	hypothetical protein	COG:COG2230:Cfa Cyclopropane fatty-acyl-phospholipid synthase and related methyltransferases [Category:I%2C Aligned:22-229%2C Eval:9.1e-91%2C score:268.3%2C C-term missing],MGA_2	TIGR:TIGR01983%3B UbiG: 3-demethylubiquinone-9 3-O-methyltransferase [Name:TIGR01983%2C Eval:2.0e-07%2C score:28.5%2C bias:0.0],COG:COG2230:Cfa Cyclopropane fatty-acyl-phospholipid synthase and related methyltransferases [Category:I%2C Aligned:22-229%2C Eval:9.1e-91%2C score:268.3%2C C-term missing],MGA_2	76.6	78.7	60.3	1.3e-103			All genomes BLAST search
GAGA-0350.Scaffold3.291594-292520	GAGA-0350	Scaffold3	291594-292520	Formica cf. japonica	Formicinae	291594	291733	139	3	A0A2N5ESX5	hypothetical protein	NA	NA	73.9	100.0	12.0	1.2e-16	NA	NA	All genomes BLAST search
GAGA-0350.Scaffold3.293727-295959	GAGA-0350	Scaffold3	293727-295959	Formica cf. japonica	Formicinae	294933	295895	962	5	A0A151ULI1	Cyclopropane fatty acyl phospholipid synthase	COG:COG2230:Cfa Cyclopropane fatty-acyl-phospholipid synthase and related methyltransferases [Category:I%2C Aligned:96-304%2C Eval:4.0e-91%2C score:270.7%2C C-term missing],MGA_3		77.8	95.3	79.9				All genomes BLAST search
GAGA-0350.Scaffold3.293727-295959	GAGA-0350	Scaffold3	293727-295959	Formica cf. japonica	Formicinae	294220	294399	179	0	NA	hypothetical protein	NA	NA	NA	NA	NA	NA	NA	NA	All genomes BLAST search
GAGA-0350.Scaffold3.293727-295959	GAGA-0350	Scaffold3	293727-295959	Formica cf. japonica	Formicinae	293727	293858	131	32	NA	hypothetical protein	NA	NA	NA	NA	NA	NA	NA	NA	All genomes BLAST search
GAGA-0350.Scaffold410.52515-53734	GAGA-0350	Scaffold410	52515-53734	Formica cf. japonica	Formicinae	52576	53724	1148	614	A0A151ULI1	Cyclopropane fatty acyl phospholipid synthase	COG:COG2230:Cfa Cyclopropane fatty-acyl-phospholipid synthase and related methyltransferases [Category:I%2C Aligned:96-371%2C Eval:4.1e-131%2C score:374.7],MGA_1		81.2	100.0	100.0				All genomes BLAST search
GAGA-0359.Scaffold11.5852663-5853883	GAGA-0359	Scaffold11	5852663-5853883	Formica japonica	Formicinae	5852724	5853872	1148	4024	A0A151ULI1	Cyclopropane fatty acyl phospholipid synthase	COG:COG2230:Cfa Cyclopropane fatty-acyl-phospholipid synthase and related methyltransferases [Category:I%2C Aligned:96-371%2C Eval:6.7e-130%2C score:371.6],MGA_1		81.2	100.0	100.0		ATG	TGA	directly classified as HQ candidate
GAGA-0359.Scaffold11.5894458-5895894	GAGA-0359	Scaffold11	5894458-5895894	Formica japonica	Formicinae	5894736	5895884	1148	4327	A0A151ULI1	Cyclopropane fatty acyl phospholipid synthase	COG:COG2230:Cfa Cyclopropane fatty-acyl-phospholipid synthase and related methyltransferases [Category:I%2C Aligned:96-371%2C Eval:6.8e-131%2C score:373.9],MGA_1		80.2	100.0	100.0				All genomes BLAST search
GAGA-0359.Scaffold114.45916-47135	GAGA-0359	Scaffold114	45916-47135	Formica japonica	Formicinae	45977	47125	1148	178	A0A151ULI1	Cyclopropane fatty acyl phospholipid synthase	COG:COG2230:Cfa Cyclopropane fatty-acyl-phospholipid synthase and related methyltransferases [Category:I%2C Aligned:96-371%2C Eval:1.6e-130%2C score:373.1],MGA_1		80.4	100.0	100.0		ATG	TGA	directly classified as HQ candidate
GAGA-0359.Scaffold12.3361534-3361785	GAGA-0359	Scaffold12	3361534-3361785	Formica japonica	Formicinae	3361584	3361785	201	10	NA	NA	NA	NA	NA	NA	NA	NA	NA	NA	directly classified as HQ candidate
GAGA-0359.Scaffold12.3361534-3361785	GAGA-0359	Scaffold12	3361534-3361785	Formica japonica	Formicinae	3361534	3361605	71	0	NA	NA	NA	NA	NA	NA	NA	NA	NA	NA	directly classified as HQ candidate
GAGA-0359.Scaffold14.4817696-4818038	GAGA-0359	Scaffold14	4817696-4818038	Formica japonica	Formicinae	4817874	4818038	164	51	NA	NA	NA	NA	NA	NA	NA	NA	NA	NA	directly classified as HQ candidate
GAGA-0359.Scaffold14.4817696-4818038	GAGA-0359	Scaffold14	4817696-4818038	Formica japonica	Formicinae	4817696	4817793	97	136	NA	NA	NA	NA	NA	NA	NA	NA	NA	NA	directly classified as HQ candidate
GAGA-0359.Scaffold177.209553-211591	GAGA-0359	Scaffold177	209553-211591	Formica japonica	Formicinae	209612	209752	140	0	A0A151ULI1	hypothetical protein	NA	NA	69.6	100.0	12.0	1.9e-11	NA	NA	All genomes BLAST search
GAGA-0359.Scaffold2.8938296-8940528	GAGA-0359	Scaffold2	8938296-8940528	Formica japonica	Formicinae	8938357	8939319	962	8	A0A151ULI1	Cyclopropane fatty acyl phospholipid synthase	COG:COG2230:Cfa Cyclopropane fatty-acyl-phospholipid synthase and related methyltransferases [Category:I%2C Aligned:96-304%2C Eval:4.0e-91%2C score:270.7%2C C-term missing],MGA_1		77.8	95.3	79.9				All genomes BLAST search
GAGA-0359.Scaffold2.8938296-8940528	GAGA-0359	Scaffold2	8938296-8940528	Formica japonica	Formicinae	8939853	8940032	179	0	NA	hypothetical protein	NA	NA	NA	NA	NA	NA	NA	NA	All genomes BLAST search
GAGA-0359.Scaffold2.8938296-8940528	GAGA-0359	Scaffold2	8938296-8940528	Formica japonica	Formicinae	8940394	8940527	133	4	NA	hypothetical protein	NA	NA	NA	NA	NA	NA	NA	NA	All genomes BLAST search
GAGA-0359.Scaffold2.8938296-8942661	GAGA-0359	Scaffold2	8938296-8942661	Formica japonica	Formicinae	8938358	8939320	962	8											directly classified as HQ candidate
GAGA-0359.Scaffold2.8938296-8942661	GAGA-0359	Scaffold2	8938296-8942661	Formica japonica	Formicinae	8941469	8941810	341	0	NA	NA	NA	NA	NA	NA	NA	NA	NA	NA	directly classified as HQ candidate
GAGA-0359.Scaffold2.8938296-8942661	GAGA-0359	Scaffold2	8938296-8942661	Formica japonica	Formicinae	8942472	8942661	189	0	NA	NA	NA	NA	NA	NA	NA	NA	NA	NA	directly classified as HQ candidate
GAGA-0359.Scaffold2.8938296-8942661	GAGA-0359	Scaffold2	8938296-8942661	Formica japonica	Formicinae	8941762	8941941	179	8	NA	NA	NA	NA	NA	NA	NA	NA	NA	NA	directly classified as HQ candidate
GAGA-0359.Scaffold2.8938296-8942661	GAGA-0359	Scaffold2	8938296-8942661	Formica japonica	Formicinae	8939854	8940033	179	0	NA	NA	NA	NA	NA	NA	NA	NA	NA	NA	directly classified as HQ candidate
GAGA-0359.Scaffold2.8941735-8942661	GAGA-0359	Scaffold2	8941735-8942661	Formica japonica	Formicinae	8941735	8942609	874	28	A0A151ULI1	hypothetical protein	COG:COG2230:Cfa Cyclopropane fatty-acyl-phospholipid synthase and related methyltransferases [Category:I%2C Aligned:21-228%2C Eval:8.0e-91%2C score:268.7%2C C-term missing],MGA_1	TIGR:TIGR01983%3B UbiG: 3-demethylubiquinone-9 3-O-methyltransferase [Name:TIGR01983%2C Eval:2.0e-07%2C score:28.5%2C bias:0.0],COG:COG2230:Cfa Cyclopropane fatty-acyl-phospholipid synthase and related methyltransferases [Category:I%2C Aligned:21-228%2C Eval:8.0e-91%2C score:268.7%2C C-term missing],MGA_1	76.6	79.0	60.3	1.3e-103			re_detected by BLAST search
GAGA-0359.Scaffold2.8941735-8942661	GAGA-0359	Scaffold2	8941735-8942661	Formica japonica	Formicinae	8942519	8942660	141	0	A0A2N5ESX5	hypothetical protein	NA	NA	74.5	100.0	12.3	4.0e-17	NA	NA	re_detected by BLAST search
GAGA-0359.Scaffold27.548903-549804	GAGA-0359	Scaffold27	548903-549804	Formica japonica	Formicinae	548910	549410	500	838	A0A151ULI1	hypothetical protein	COG:COG2230:Cfa Cyclopropane fatty-acyl-phospholipid synthase and related methyltransferases [Category:I%2C Aligned:2-155%2C Eval:5.4e-63%2C score:192.5%2C N-term missing],MGA_1	NA	78.9	100.0	43.3	3.8e-80	NA	NA	re_detected by BLAST search
GAGA-0359.Scaffold27.548903-549804	GAGA-0359	Scaffold27	548903-549804	Formica japonica	Formicinae	549515	549803	288	0	A0A151ULI1	hypothetical protein	NA	NA	78.1	100.0	25.1	1.1e-43	NA	NA	re_detected by BLAST search
GAGA-0359.Scaffold27.548903-551122	GAGA-0359	Scaffold27	548903-551122	Formica japonica	Formicinae	550334	551059	725	1076					NA	NA	NA	NA	NA	NA	directly classified as HQ candidate
GAGA-0359.Scaffold27.548903-551122	GAGA-0359	Scaffold27	548903-551122	Formica japonica	Formicinae	548911	549411	500	838				NA	NA	NA	NA	NA	NA	NA	directly classified as HQ candidate
GAGA-0359.Scaffold27.550186-551122	GAGA-0359	Scaffold27	550186-551122	Formica japonica	Formicinae	550333	551058	725	1076	A0A4R1NAR1	hypothetical protein			69.4	85.1	53.8	1.8e-84	NA	NA	re_detected by BLAST search
GAGA-0359.Scaffold27.550186-551122	GAGA-0359	Scaffold27	550186-551122	Formica japonica	Formicinae	550186	550263	77	0	NA	hypothetical protein	NA	NA	NA	NA	NA	NA	NA	NA	re_detected by BLAST search
GAGA-0359.Scaffold313.72749-73969	GAGA-0359	Scaffold313	72749-73969	Formica japonica	Formicinae	72810	73958	1148	5941	A0A151ULI1	Cyclopropane fatty acyl phospholipid synthase	COG:COG2230:Cfa Cyclopropane fatty-acyl-phospholipid synthase and related methyltransferases [Category:I%2C Aligned:96-371%2C Eval:6.3e-131%2C score:374.3],MGA_1		82.0	100.0	100.0				re_detected by BLAST search
GAGA-0359.Scaffold43.592158-593375	GAGA-0359	Scaffold43	592158-593375	Formica japonica	Formicinae	592163	593311	1148	316	A0A151ULI1	Cyclopropane fatty acyl phospholipid synthase	COG:COG2230:Cfa Cyclopropane fatty-acyl-phospholipid synthase and related methyltransferases [Category:I%2C Aligned:96-371%2C Eval:5.0e-124%2C score:356.6],MGA_1		77.8	100.0	100.0		ATG	TGA	directly classified as HQ candidate
GAGA-0485.Scaffold12.5837061-5838283	GAGA-0485	Scaffold12	5837061-5838283	Formica sanguinea	Formicinae	5837383	5838219	836	18	A0A151ULI1	hypothetical protein	COG:COG2230:Cfa Cyclopropane fatty-acyl-phospholipid synthase and related methyltransferases [Category:I%2C Aligned:96-278%2C Eval:2.5e-81%2C score:244.1%2C C-term missing],MGA_2	TIGR:TIGR01983%3B UbiG: 3-demethylubiquinone-9 3-O-methyltransferase [Name:TIGR01983%2C Eval:1.8e-07%2C score:28.6%2C bias:0.0],COG:COG2230:Cfa Cyclopropane fatty-acyl-phospholipid synthase and related methyltransferases [Category:I%2C Aligned:96-278%2C Eval:2.5e-81%2C score:244.1%2C C-term missing],MGA_2	77.8	100.0	72.8	3.9e-129			re_detected by BLAST search
GAGA-0485.Scaffold12.5837061-5838283	GAGA-0485	Scaffold12	5837061-5838283	Formica sanguinea	Formicinae	5837061	5837254	193	0	A0A2N5ESX5	hypothetical protein	NA	NA	77.4	96.9	16.2	2.8e-26	NA	NA	re_detected by BLAST search
GAGA-0485.Scaffold19.2863851-2864103	GAGA-0485	Scaffold19	2863851-2864103	Formica sanguinea	Formicinae	2863851	2864103	252	0	NA	NA	NA	NA	NA	NA	NA	NA	NA	NA	directly classified as HQ candidate
GAGA-0485.Scaffold2.586098-587534	GAGA-0485	Scaffold2	586098-587534	Formica sanguinea	Formicinae	586376	587524	1148	27	A0A151ULI1	Cyclopropane fatty acyl phospholipid synthase	COG:COG2230:Cfa Cyclopropane fatty-acyl-phospholipid synthase and related methyltransferases [Category:I%2C Aligned:96-371%2C Eval:1.6e-130%2C score:373.1],MGA_1		82.0	100.0	100.0				re_detected by BLAST search
GAGA-0485.Scaffold3.1952333-1953120	GAGA-0485	Scaffold3	1952333-1953120	Formica sanguinea	Formicinae	1952333	1952928	595	20				NA	NA	NA	NA	NA	NA	NA	directly classified as HQ candidate
GAGA-0485.Scaffold3.1952333-1953120	GAGA-0485	Scaffold3	1952333-1953120	Formica sanguinea	Formicinae	1953061	1953120	59	1	NA	NA	NA	NA	NA	NA	NA	NA	NA	NA	directly classified as HQ candidate
GAGA-0485.Scaffold33.855025-856421	GAGA-0485	Scaffold33	855025-856421	Formica sanguinea	Formicinae	855032	856180	1148	168	A0A151ULI1	Cyclopropane fatty acyl phospholipid synthase	COG:COG2230:Cfa Cyclopropane fatty-acyl-phospholipid synthase and related methyltransferases [Category:I%2C Aligned:101-371%2C Eval:3.7e-131%2C score:374.7],MGA_1		81.5	100.0	100.0				re_detected by BLAST search
GAGA-0485.Scaffold4.8837683-8839152	GAGA-0485	Scaffold4	8837683-8839152	Formica sanguinea	Formicinae	8837744	8838658	914	0	A0A151ULI1	Cyclopropane fatty acyl phospholipid synthase	COG:COG2230:Cfa Cyclopropane fatty-acyl-phospholipid synthase and related methyltransferases [Category:I%2C Aligned:96-296%2C Eval:6.7e-89%2C score:264.1%2C C-term missing],MGA_1		77.6	96.7	77.0		ATG	TGA	directly classified as HQ candidate
GAGA-0485.Scaffold4.8837683-8839152	GAGA-0485	Scaffold4	8837683-8839152	Formica sanguinea	Formicinae	8838582	8839088	506	2	A0A151ULI1	hypothetical protein	NA	NA	75.5	91.7	40.5	9.1e-66	ATG	TGA	directly classified as HQ candidate
GAGA-0485.Scaffold4.8848842-8849572	GAGA-0485	Scaffold4	8848842-8849572	Formica sanguinea	Formicinae	8848842	8849571	729	6	A0A151ULI1	hypothetical protein	COG:COG2230:Cfa Cyclopropane fatty-acyl-phospholipid synthase and related methyltransferases [Category:I%2C Aligned:22-230%2C Eval:4.9e-92%2C score:269.9%2C C-term missing],MGA_1	TIGR:TIGR01983%3B UbiG: 3-demethylubiquinone-9 3-O-methyltransferase [Name:TIGR01983%2C Eval:3.3e-08%2C score:31.1%2C bias:0.0],COG:COG2230:Cfa Cyclopropane fatty-acyl-phospholipid synthase and related methyltransferases [Category:I%2C Aligned:22-230%2C Eval:4.9e-92%2C score:269.9%2C C-term missing],MGA_1	78.4	94.7	60.3	8.8e-108	ATT	CAG	directly classified as HQ candidate
GAGA-0485.Scaffold41.1016805-1018164	GAGA-0485	Scaffold41	1016805-1018164	Formica sanguinea	Formicinae	1017006	1018154	1148	26	A0A151ULI1	Cyclopropane fatty acyl phospholipid synthase	COG:COG2230:Cfa Cyclopropane fatty-acyl-phospholipid synthase and related methyltransferases [Category:I%2C Aligned:96-371%2C Eval:4.4e-125%2C score:359.3],MGA_2		77.8	100.0	100.0				re_detected by BLAST search
GAGA-0485.Scaffold41.1016805-1018164	GAGA-0485	Scaffold41	1016805-1018164	Formica sanguinea	Formicinae	1016805	1016893	88	0	NA	hypothetical protein	NA	NA	NA	NA	NA	NA	NA	NA	re_detected by BLAST search
GAGA-0485.Scaffold6.5437357-5438799	GAGA-0485	Scaffold6	5437357-5438799	Formica sanguinea	Formicinae	5437365	5438513	1148	4426	A0A151ULI1	Cyclopropane fatty acyl phospholipid synthase	COG:COG2230:Cfa Cyclopropane fatty-acyl-phospholipid synthase and related methyltransferases [Category:I%2C Aligned:96-371%2C Eval:6.9e-132%2C score:376.6],MGA_1		82.0	100.0	100.0		ATG	TGA	directly classified as HQ candidate
GAGA-0485.Scaffold60.210127-212655	GAGA-0485	Scaffold60	210127-212655	Formica sanguinea	Formicinae	210127	212645	2518	1	A0A151ULI1	hypothetical protein	COG:COG2230:Cfa Cyclopropane fatty-acyl-phospholipid synthase and related methyltransferases [Category:I%2C Aligned:560-827%2C Eval:6.6e-123%2C score:368.9],MGA_1	TIGR:TIGR01983%3B UbiG: 3-demethylubiquinone-9 3-O-methyltransferase [Name:TIGR01983%2C Eval:2.5e-08%2C score:31.5%2C bias:0.0],COG:COG2230:Cfa Cyclopropane fatty-acyl-phospholipid synthase and related methyltransferases [Category:I%2C Aligned:560-827%2C Eval:6.6e-123%2C score:368.9],MGA_1	84.2	33.3	72.8	2.8e-146			re_detected by BLAST search
GAGA-0495.Scaffold15103.97-806	GAGA-0495	Scaffold15103	97-806	Formica fusca	Formicinae	97	805	708	112	A0A151ULI1	hypothetical protein	COG:COG2230:Cfa Cyclopropane fatty-acyl-phospholipid synthase and related methyltransferases [Category:I%2C Aligned:15-223%2C Eval:1.3e-95%2C score:278.7%2C C-term missing],MGA_1	TIGR:TIGR01983%3B UbiG: 3-demethylubiquinone-9 3-O-methyltransferase [Name:TIGR01983%2C Eval:3.7e-09%2C score:34.2%2C bias:0.0],COG:COG2230:Cfa Cyclopropane fatty-acyl-phospholipid synthase and related methyltransferases [Category:I%2C Aligned:15-223%2C Eval:1.3e-95%2C score:278.7%2C C-term missing],MGA_1	79.8	94.1	58.2	1.6e-106	NA	NA	re_detected by BLAST search
GAGA-0495.Scaffold1944.11279-11957	GAGA-0495	Scaffold1944	11279-11957	Formica fusca	Formicinae	11279	11475	196	52	A0A7X2RP89	hypothetical protein	NA	NA	82.3	96.9	16.2	2.6e-24	NA	NA	re_detected by BLAST search
GAGA-0495.Scaffold1944.11279-11957	GAGA-0495	Scaffold1944	11279-11957	Formica fusca	Formicinae	11813	11956	143	221	A0A2N5ESX5	hypothetical protein	NA	NA	72.9	100.0	12.5	6.7e-17	NA	NA	re_detected by BLAST search
GAGA-0495.Scaffold3031.1989-3409	GAGA-0495	Scaffold3031	1989-3409	Formica fusca	Formicinae	2721	3401	680	510	A0A151ULI1	hypothetical protein	COG:COG2230:Cfa Cyclopropane fatty-acyl-phospholipid synthase and related methyltransferases [Category:I%2C Aligned:1-215%2C Eval:1.5e-102%2C score:295.7%2C N-term missing],MGA_2	TIGR:TIGR01983%3B UbiG: 3-demethylubiquinone-9 3-O-methyltransferase [Name:TIGR01983%2C Eval:4.2e-08%2C score:30.7%2C bias:0.0],COG:COG2230:Cfa Cyclopropane fatty-acyl-phospholipid synthase and related methyltransferases [Category:I%2C Aligned:1-215%2C Eval:1.5e-102%2C score:295.7%2C N-term missing],MGA_2	81.9	100.0	59.0	6.6e-115	NA	NA	re_detected by BLAST search
GAGA-0495.Scaffold3031.1989-3409	GAGA-0495	Scaffold3031	1989-3409	Formica fusca	Formicinae	2256	2720	464	137	A0A151ULI1	hypothetical protein	NA	NA	77.1	92.9	37.6	6.5e-62	NA	NA	re_detected by BLAST search
GAGA-0495.Scaffold3031.3707-4349	GAGA-0495	Scaffold3031	3707-4349	Formica fusca	Formicinae	3707	4325	618	102	A0A151ULI1	hypothetical protein	COG:COG2230:Cfa Cyclopropane fatty-acyl-phospholipid synthase and related methyltransferases [Category:I%2C Aligned:1-194%2C Eval:1.3e-86%2C score:254.5%2C N-term missing],MGA_1	NA	82.9	100.0	53.5	6.3e-103	NA	NA	re_detected by BLAST search
GAGA-0495.Scaffold8418.1-629	GAGA-0495	Scaffold8418	1-629	Formica fusca	Formicinae	1	619	618	102	A0A151ULI1	hypothetical protein	COG:COG2230:Cfa Cyclopropane fatty-acyl-phospholipid synthase and related methyltransferases [Category:I%2C Aligned:1-194%2C Eval:3.9e-84%2C score:247.9%2C N-term missing],MGA_1	NA	82.0	100.0	53.5	1.8e-102	NA	NA	re_detected by BLAST search
GAGA-0502.Scaffold10.4109459-4110669	GAGA-0502	Scaffold10	4109459-4110669	Iberoformica subrufa	Formicinae	4109519	4110664	1145	130	A0A151ULI1	Cyclopropane fatty acyl phospholipid synthase	COG:COG2230:Cfa Cyclopropane fatty-acyl-phospholipid synthase and related methyltransferases [Category:I%2C Aligned:101-370%2C Eval:1.8e-127%2C score:365.4],MGA_1		79.1	100.0	100.0		ATG	TGA	directly classified as HQ candidate
GAGA-0502.Scaffold104.261855-262248	GAGA-0502	Scaffold104	261855-262248	Iberoformica subrufa	Formicinae	262071	262214	143	0	NA	hypothetical protein	NA	NA	NA	NA	NA	NA	ATG	TAA	directly classified as HQ candidate
GAGA-0502.Scaffold106.161430-161824	GAGA-0502	Scaffold106	161430-161824	Iberoformica subrufa	Formicinae	161670	161819	149	0	A0A0T9LFT5	hypothetical protein	NA	NA	75.5	100.0	12.8	1.9e-16	NA	NA	re_detected by BLAST search
GAGA-0502.Scaffold106.161430-161824	GAGA-0502	Scaffold106	161430-161824	Iberoformica subrufa	Formicinae	161461	161604	143	0	NA	hypothetical protein	NA	NA	NA	NA	NA	NA	NA	NA	re_detected by BLAST search
GAGA-0502.Scaffold15.2279751-2280007	GAGA-0502	Scaffold15	2279751-2280007	Iberoformica subrufa	Formicinae	2279782	2280007	225	0	NA	NA	NA	NA	NA	NA	NA	NA	NA	NA	directly classified as HQ candidate
GAGA-0502.Scaffold15.2279751-2280007	GAGA-0502	Scaffold15	2279751-2280007	Iberoformica subrufa	Formicinae	2279751	2279822	71	0	NA	NA	NA	NA	NA	NA	NA	NA	NA	NA	directly classified as HQ candidate
GAGA-0502.Scaffold150.30586-30956	GAGA-0502	Scaffold150	30586-30956	Iberoformica subrufa	Formicinae	30593	30826	233	0	A0A151ULI1	hypothetical protein	NA	NA	74.0	100.0	20.1	2.4e-30	NA	NA	re_detected by BLAST search
GAGA-0502.Scaffold24.3179491-3179882	GAGA-0502	Scaffold24	3179491-3179882	Iberoformica subrufa	Formicinae	3179493	3179642	149	0	A0A0T9LFT5	hypothetical protein	NA	NA	71.4	100.0	12.8	2.2e-15	TTG	TGA	directly classified as HQ candidate
GAGA-0502.Scaffold36.144621-145755	GAGA-0502	Scaffold36	144621-145755	Iberoformica subrufa	Formicinae	145032	145691	659	21	A0A151ULI1	hypothetical protein	NA	NA	72.6	99.5	57.2	3.0e-93	NA	NA	re_detected by BLAST search
GAGA-0502.Scaffold36.144621-145755	GAGA-0502	Scaffold36	144621-145755	Iberoformica subrufa	Formicinae	144621	145013	392	63	A0A151ULI1	hypothetical protein	NA	NA	84.3	77.9	26.6	1.6e-50	NA	NA	re_detected by BLAST search
GAGA-0502.Scaffold36.144621-149765	GAGA-0502	Scaffold36	144621-149765	Iberoformica subrufa	Formicinae	145033	145692	659	21				NA	NA	NA	NA	NA	NA	NA	directly classified as HQ candidate
GAGA-0502.Scaffold36.144621-149765	GAGA-0502	Scaffold36	144621-149765	Iberoformica subrufa	Formicinae	144621	145014	393	63				NA	NA	NA	NA	NA	NA	NA	directly classified as HQ candidate
GAGA-0502.Scaffold36.144621-149765	GAGA-0502	Scaffold36	144621-149765	Iberoformica subrufa	Formicinae	149528	149761	233	0	NA	NA	NA	NA	NA	NA	NA	NA	NA	NA	directly classified as HQ candidate
GAGA-0502.Scaffold36.144621-149765	GAGA-0502	Scaffold36	144621-149765	Iberoformica subrufa	Formicinae	148956	149141	185	5	NA	NA	NA	NA	NA	NA	NA	NA	NA	NA	directly classified as HQ candidate
GAGA-0502.Scaffold36.148517-149765	GAGA-0502	Scaffold36	148517-149765	Iberoformica subrufa	Formicinae	149398	149764	366	4	NA	hypothetical protein	NA	NA	NA	NA	NA	NA	NA	NA	re_detected by BLAST search
GAGA-0502.Scaffold36.148517-149765	GAGA-0502	Scaffold36	148517-149765	Iberoformica subrufa	Formicinae	148955	149140	185	4	A0A151ULI1	hypothetical protein	NA	NA	82.0	100.0	15.9	1.6e-26	NA	NA	re_detected by BLAST search
GAGA-0502.Scaffold36.148517-149765	GAGA-0502	Scaffold36	148517-149765	Iberoformica subrufa	Formicinae	148742	148912	170	12	A0A085U7V8	hypothetical protein	NA	NA	73.2	98.2	14.6	1.0e-17	NA	NA	re_detected by BLAST search
GAGA-0502.Scaffold36.148517-149765	GAGA-0502	Scaffold36	148517-149765	Iberoformica subrufa	Formicinae	148578	148718	140	0	A0A151ULI1	hypothetical protein	NA	NA	65.7	76.1	9.1	3.7e-07	NA	NA	re_detected by BLAST search
GAGA-0502.Scaffold36.343969-345107	GAGA-0502	Scaffold36	343969-345107	Iberoformica subrufa	Formicinae	344380	344790	410	2	A0A151ULI1	hypothetical protein	NA	NA	73.5	99.3	35.5	1.9e-56	NA	NA	re_detected by BLAST search
GAGA-0502.Scaffold36.343969-345107	GAGA-0502	Scaffold36	343969-345107	Iberoformica subrufa	Formicinae	343969	344361	392	11	A0A151ULI1	hypothetical protein	NA	NA	82.4	77.9	26.6	1.5e-48	NA	NA	re_detected by BLAST search
GAGA-0502.Scaffold36.343969-345107	GAGA-0502	Scaffold36	343969-345107	Iberoformica subrufa	Formicinae	344783	345043	260	0	A0A151ULI1	hypothetical protein	NA	NA	68.7	96.5	21.7	3.4e-29	NA	NA	re_detected by BLAST search
GAGA-0502.Scaffold36.343969-348755	GAGA-0502	Scaffold36	343969-348755	Iberoformica subrufa	Formicinae	344381	344791	410	2				NA	NA	NA	NA	NA	NA	NA	directly classified as HQ candidate
GAGA-0502.Scaffold36.343969-348755	GAGA-0502	Scaffold36	343969-348755	Iberoformica subrufa	Formicinae	343969	344362	393	11				NA	NA	NA	NA	NA	NA	NA	directly classified as HQ candidate
GAGA-0502.Scaffold36.343969-348755	GAGA-0502	Scaffold36	343969-348755	Iberoformica subrufa	Formicinae	344784	345044	260	0	NA	NA	NA	NA	NA	NA	NA	NA	NA	NA	directly classified as HQ candidate
GAGA-0502.Scaffold39.21081-21451	GAGA-0502	Scaffold39	21081-21451	Iberoformica subrufa	Formicinae	21208	21441	233	0	A0A151ULI1	hypothetical protein	NA	NA	74.0	100.0	20.1	2.4e-30	ATG	TGA	directly classified as HQ candidate
GAGA-0502.Scaffold54.758627-759021	GAGA-0502	Scaffold54	758627-759021	Iberoformica subrufa	Formicinae	758627	758918	291	0	A0A151ULI1	hypothetical protein	NA	NA	79.4	70.8	17.8	3.8e-28	NA	NA	re_detected by BLAST search
GAGA-0502.Scaffold54.758627-759021	GAGA-0502	Scaffold54	758627-759021	Iberoformica subrufa	Formicinae	758867	759016	149	0	A0A0T9LFT5	hypothetical protein	NA	NA	73.5	100.0	12.8	4.3e-16	NA	NA	re_detected by BLAST search
GAGA-0502.Scaffold7.8320662-8321878	GAGA-0502	Scaffold7	8320662-8321878	Iberoformica subrufa	Formicinae	8320723	8321871	1148	24580	A0A151ULI1	Cyclopropane fatty acyl phospholipid synthase	COG:COG2230:Cfa Cyclopropane fatty-acyl-phospholipid synthase and related methyltransferases [Category:I%2C Aligned:96-371%2C Eval:8.2e-122%2C score:350.8],MGA_1		77.3	100.0	100.0		ATG	TAA	directly classified as HQ candidate
NCBI-0008.NW_021848844.1.1255-1636	NCBI-0008	NW_021848844_1	1255-1636	Formica exsecta	Formicinae	1524	1635	111	4	A0A151ULI1	hypothetical protein	NA	NA	75.7	100.0	9.7	2.3e-09	NA	NA	re_detected by BLAST search
NCBI-0008.NW_021848844.1.4160-5517	NCBI-0008	NW_021848844_1	4160-5517	Formica exsecta	Formicinae	4361	5506	1145	3	A0A151ULI1	Cyclopropane fatty acyl phospholipid synthase	COG:COG2230:Cfa Cyclopropane fatty-acyl-phospholipid synthase and related methyltransferases [Category:I%2C Aligned:95-370%2C Eval:4.2e-122%2C score:351.6],MGA_2		79.6	100.0	100.0				re_detected by BLAST search
NCBI-0008.NW_021848844.1.4160-5517	NCBI-0008	NW_021848844_1	4160-5517	Formica exsecta	Formicinae	4160	4248	88	6	NA	hypothetical protein	NA	NA	NA	NA	NA	NA	NA	NA	re_detected by BLAST search
NCBI-0008.NW_021848985.1.6369-8604	NCBI-0008	NW_021848985_1	6369-8604	Formica exsecta	Formicinae	7541	8603	1062	78	A0A151ULI1	Cyclopropane fatty acyl phospholipid synthase	COG:COG2230:Cfa Cyclopropane fatty-acyl-phospholipid synthase and related methyltransferases [Category:I%2C Aligned:82-354%2C Eval:1.1e-124%2C score:356.9],MGA_3		79.5	97.5	90.3				re_detected by BLAST search
NCBI-0008.NW_021848985.1.6369-8604	NCBI-0008	NW_021848985_1	6369-8604	Formica exsecta	Formicinae	6788	7396	608	0	A0A151ULI1	hypothetical protein	COG:COG2230:Cfa Cyclopropane fatty-acyl-phospholipid synthase and related methyltransferases [Category:I%2C Aligned:2-184%2C Eval:5.5e-79%2C score:234.8%2C C-term missing],MGA_2	TIGR:TIGR01983%3B UbiG: 3-demethylubiquinone-9 3-O-methyltransferase [Name:TIGR01983%2C Eval:2.9e-09%2C score:34.5%2C bias:0.0],COG:COG2230:Cfa Cyclopropane fatty-acyl-phospholipid synthase and related methyltransferases [Category:I%2C Aligned:2-184%2C Eval:5.5e-79%2C score:234.8%2C C-term missing],MGA_2	77.8	91.6	48.3	1.4e-86	NA	NA	re_detected by BLAST search
NCBI-0008.NW_021848985.1.6369-8604	NCBI-0008	NW_021848985_1	6369-8604	Formica exsecta	Formicinae	6428	6757	329	8	A0A085U7V8	hypothetical protein	NA	NA	71.8	100.0	28.7	1.1e-40	NA	NA	re_detected by BLAST search
NCBI-0008.NW_021849229.1.1486-2181	NCBI-0008	NW_021849229_1	1486-2181	Formica exsecta	Formicinae	1486	2180	694	77	A0A151ULI1	hypothetical protein	COG:COG2230:Cfa Cyclopropane fatty-acyl-phospholipid synthase and related methyltransferases [Category:I%2C Aligned:22-230%2C Eval:3.2e-88%2C score:259.5%2C C-term missing],MGA_1	TIGR:TIGR01983%3B UbiG: 3-demethylubiquinone-9 3-O-methyltransferase [Name:TIGR01983%2C Eval:2.0e-08%2C score:31.8%2C bias:0.0],COG:COG2230:Cfa Cyclopropane fatty-acyl-phospholipid synthase and related methyltransferases [Category:I%2C Aligned:22-230%2C Eval:3.2e-88%2C score:259.5%2C C-term missing],MGA_1	77.5	99.6	60.3	2.2e-105	NA	NA	re_detected by BLAST search
NCBI-0008.NW_021850465.1.77608-78020	NCBI-0008	NW_021850465_1	77608-78020	Formica exsecta	Formicinae	77809	78019	210	60	A0A4R1NAR1	hypothetical protein	NA	NA	74.3	100.0	18.3	1.3e-28	NA	NA	re_detected by BLAST search
NCBI-0008.NW_021852441.1.4-581	NCBI-0008	NW_021852441_1	4-581	Formica exsecta	Formicinae	4	349	345	128	A0A151ULI1	hypothetical protein	COG:COG2230:Cfa Cyclopropane fatty-acyl-phospholipid synthase and related methyltransferases [Category:I%2C Aligned:1-113%2C Eval:1.2e-53%2C score:166.7%2C C-term missing],MGA_1	NA	78.9	100.0	29.8	8.3e-52	NA	NA	re_detected by BLAST search
NCBI-0008.NW_021852441.1.4-581	NCBI-0008	NW_021852441_1	4-581	Formica exsecta	Formicinae	385	580	195	142	A0A151ULI1	hypothetical protein	NA	NA	83.1	100.0	17.0	5.5e-27	NA	NA	re_detected by BLAST search
OUT-0001.CM020807.1.1897397-1898202	OUT-0001	CM020807_1	1897397-1898202	Formica selysi	Formicinae	1897397	1897779	382	1	NA	NA	NA	NA	NA	NA	NA	NA	NA	NA	directly classified as HQ candidate
OUT-0001.CM020807.1.1897397-1898202	OUT-0001	CM020807_1	1897397-1898202	Formica selysi	Formicinae	1898143	1898202	59	0	NA	NA	NA	NA	NA	NA	NA	NA	NA	NA	directly classified as HQ candidate
OUT-0001.CM020807.1.5579930-5580828	OUT-0001	CM020807_1	5579930-5580828	Formica selysi	Formicinae	5580121	5580786	665	0			NA	NA	NA	NA	NA	NA	NA	NA	directly classified as HQ candidate
OUT-0001.CM020808.1.1376398-1377617	OUT-0001	CM020808_1	1376398-1377617	Formica selysi	Formicinae	1376459	1377607	1148	8	A0A151ULI1	Cyclopropane fatty acyl phospholipid synthase	COG:COG2230:Cfa Cyclopropane fatty-acyl-phospholipid synthase and related methyltransferases [Category:I%2C Aligned:96-371%2C Eval:1.9e-123%2C score:355.0],MGA_1		80.2	100.0	100.0		ATG	TGA	directly classified as HQ candidate
OUT-0001.CM020808.1.166507-167308	OUT-0001	CM020808_1	166507-167308	Formica selysi	Formicinae	167176	167308	132	0	NA	NA	NA	NA	NA	NA	NA	NA	NA	NA	directly classified as HQ candidate
OUT-0001.CM020808.1.166507-167308	OUT-0001	CM020808_1	166507-167308	Formica selysi	Formicinae	166629	166754	125	0	NA	NA	NA	NA	NA	NA	NA	NA	NA	NA	directly classified as HQ candidate
OUT-0001.CM020810.1.304118-304848	OUT-0001	CM020810_1	304118-304848	Formica selysi	Formicinae	304118	304847	729	0	A0A151ULI1	hypothetical protein	COG:COG2230:Cfa Cyclopropane fatty-acyl-phospholipid synthase and related methyltransferases [Category:I%2C Aligned:22-230%2C Eval:7.5e-90%2C score:264.1%2C C-term missing],MGA_1	TIGR:TIGR01983%3B UbiG: 3-demethylubiquinone-9 3-O-methyltransferase [Name:TIGR01983%2C Eval:9.8e-08%2C score:29.5%2C bias:0.0],COG:COG2230:Cfa Cyclopropane fatty-acyl-phospholipid synthase and related methyltransferases [Category:I%2C Aligned:22-230%2C Eval:7.5e-90%2C score:264.1%2C C-term missing],MGA_1	77.1	95.0	60.3	3.1e-105	NA	NA	re_detected by BLAST search
OUT-0001.CM020810.1.304118-308835	OUT-0001	CM020810_1	304118-308835	Formica selysi	Formicinae	307131	308093	962	0											directly classified as HQ candidate
OUT-0001.CM020810.1.304118-308835	OUT-0001	CM020810_1	304118-308835	Formica selysi	Formicinae	304118	304567	449	0				NA	NA	NA	NA	NA	NA	NA	directly classified as HQ candidate
OUT-0001.CM020810.1.304118-308835	OUT-0001	CM020810_1	304118-308835	Formica selysi	Formicinae	304640	304819	179	0	NA	NA	NA	NA	NA	NA	NA	NA	NA	NA	directly classified as HQ candidate
OUT-0001.CM020810.1.304118-308835	OUT-0001	CM020810_1	304118-308835	Formica selysi	Formicinae	308627	308806	179	0	NA	NA	NA	NA	NA	NA	NA	NA	NA	NA	directly classified as HQ candidate
OUT-0001.CM020810.1.304118-308835	OUT-0001	CM020810_1	304118-308835	Formica selysi	Formicinae	305774	305905	131	0	NA	NA	NA	NA	NA	NA	NA	NA	NA	NA	directly classified as HQ candidate
OUT-0001.CM020810.1.306868-308835	OUT-0001	CM020810_1	306868-308835	Formica selysi	Formicinae	307130	308092	962	0	A0A151ULI1	Cyclopropane fatty acyl phospholipid synthase	COG:COG2230:Cfa Cyclopropane fatty-acyl-phospholipid synthase and related methyltransferases [Category:I%2C Aligned:96-304%2C Eval:1.7e-91%2C score:271.4%2C C-term missing],MGA_2		78.1	95.3	79.9				re_detected by BLAST search
OUT-0001.CM020810.1.306868-308835	OUT-0001	CM020810_1	306868-308835	Formica selysi	Formicinae	308626	308805	179	0	NA	hypothetical protein	NA	NA	NA	NA	NA	NA	NA	NA	re_detected by BLAST search
OUT-0001.CM020810.1.306868-308835	OUT-0001	CM020810_1	306868-308835	Formica selysi	Formicinae	306868	307017	149	0	NA	hypothetical protein	NA	NA	NA	NA	NA	NA	NA	NA	re_detected by BLAST search
OUT-0001.CM020810.1.311254-313221	OUT-0001	CM020810_1	311254-313221	Formica selysi	Formicinae	311516	312478	962	0	A0A151ULI1	Cyclopropane fatty acyl phospholipid synthase	COG:COG2230:Cfa Cyclopropane fatty-acyl-phospholipid synthase and related methyltransferases [Category:I%2C Aligned:96-304%2C Eval:1.7e-91%2C score:271.4%2C C-term missing],MGA_2		78.1	95.3	79.9				re_detected by BLAST search
OUT-0001.CM020810.1.311254-313221	OUT-0001	CM020810_1	311254-313221	Formica selysi	Formicinae	313012	313191	179	0	NA	hypothetical protein	NA	NA	NA	NA	NA	NA	NA	NA	re_detected by BLAST search
OUT-0001.CM020810.1.311254-313221	OUT-0001	CM020810_1	311254-313221	Formica selysi	Formicinae	311254	311403	149	0	NA	hypothetical protein	NA	NA	NA	NA	NA	NA	NA	NA	re_detected by BLAST search
OUT-0001.CM020810.1.311254-320250	OUT-0001	CM020810_1	311254-320250	Formica selysi	Formicinae	315503	316465	962	0											directly classified as HQ candidate
OUT-0001.CM020810.1.311254-320250	OUT-0001	CM020810_1	311254-320250	Formica selysi	Formicinae	311517	312479	962	0											directly classified as HQ candidate
OUT-0001.CM020810.1.311254-320250	OUT-0001	CM020810_1	311254-320250	Formica selysi	Formicinae	319490	320250	760	0											directly classified as HQ candidate
OUT-0001.CM020810.1.311254-320250	OUT-0001	CM020810_1	311254-320250	Formica selysi	Formicinae	313695	313904	209	0	NA	NA	NA	NA	NA	NA	NA	NA	NA	NA	directly classified as HQ candidate
OUT-0001.CM020810.1.311254-320250	OUT-0001	CM020810_1	311254-320250	Formica selysi	Formicinae	317681	317890	209	0	NA	NA	NA	NA	NA	NA	NA	NA	NA	NA	directly classified as HQ candidate
OUT-0001.CM020810.1.311254-320250	OUT-0001	CM020810_1	311254-320250	Formica selysi	Formicinae	313013	313192	179	0	NA	NA	NA	NA	NA	NA	NA	NA	NA	NA	directly classified as HQ candidate
OUT-0001.CM020810.1.311254-320250	OUT-0001	CM020810_1	311254-320250	Formica selysi	Formicinae	314147	314278	131	0	NA	NA	NA	NA	NA	NA	NA	NA	NA	NA	directly classified as HQ candidate
OUT-0001.CM020810.1.311254-320250	OUT-0001	CM020810_1	311254-320250	Formica selysi	Formicinae	318133	318264	131	0	NA	NA	NA	NA	NA	NA	NA	NA	NA	NA	directly classified as HQ candidate
OUT-0001.CM020810.1.315240-317207	OUT-0001	CM020810_1	315240-317207	Formica selysi	Formicinae	315502	316464	962	0	A0A151ULI1	Cyclopropane fatty acyl phospholipid synthase	COG:COG2230:Cfa Cyclopropane fatty-acyl-phospholipid synthase and related methyltransferases [Category:I%2C Aligned:96-304%2C Eval:1.7e-91%2C score:271.4%2C C-term missing],MGA_2		78.1	95.3	79.9				re_detected by BLAST search
OUT-0001.CM020810.1.315240-317207	OUT-0001	CM020810_1	315240-317207	Formica selysi	Formicinae	316998	317177	179	0	NA	hypothetical protein	NA	NA	NA	NA	NA	NA	NA	NA	re_detected by BLAST search
OUT-0001.CM020810.1.315240-317207	OUT-0001	CM020810_1	315240-317207	Formica selysi	Formicinae	315240	315389	149	0	NA	hypothetical protein	NA	NA	NA	NA	NA	NA	NA	NA	re_detected by BLAST search
OUT-0001.CM020810.1.319227-320250	OUT-0001	CM020810_1	319227-320250	Formica selysi	Formicinae	319489	320249	760	0	A0A151ULI1	hypothetical protein	COG:COG2230:Cfa Cyclopropane fatty-acyl-phospholipid synthase and related methyltransferases [Category:I%2C Aligned:96-253%2C Eval:1.4e-73%2C score:223.3%2C C-term missing],MGA_2	TIGR:TIGR02021%3B BchM-ChlM: magnesium protoporphyrin O-methyltransferase [Name:TIGR02021%2C Eval:8.5e-07%2C score:26.6%2C bias:0.0],COG:COG2230:Cfa Cyclopropane fatty-acyl-phospholipid synthase and related methyltransferases [Category:I%2C Aligned:96-253%2C Eval:1.4e-73%2C score:223.3%2C C-term missing],MGA_2	78.3	99.6	66.1	1.7e-117			re_detected by BLAST search
OUT-0001.CM020810.1.319227-320250	OUT-0001	CM020810_1	319227-320250	Formica selysi	Formicinae	319227	319376	149	0	NA	hypothetical protein	NA	NA	NA	NA	NA	NA	NA	NA	re_detected by BLAST search
OUT-0001.CM020815.1.6441834-6442103	OUT-0001	CM020815_1	6441834-6442103	Formica selysi	Formicinae	6442034	6442103	69	11	NA	NA	NA	NA	NA	NA	NA	NA	NA	NA	directly classified as HQ candidate
OUT-0001.CM020815.1.7508464-7509896	OUT-0001	CM020815_1	7508464-7509896	Formica selysi	Formicinae	7508742	7509890	1148	43	A0A151ULI1	Cyclopropane fatty acyl phospholipid synthase	COG:COG2230:Cfa Cyclopropane fatty-acyl-phospholipid synthase and related methyltransferases [Category:I%2C Aligned:96-371%2C Eval:1.0e-131%2C score:376.2],MGA_1		82.0	100.0	100.0				re_detected by BLAST search
OUT-0001.CM020817.1.1707598-1708955	OUT-0001	CM020817_1	1707598-1708955	Formica selysi	Formicinae	1707799	1708947	1148	0	A0A151ULI1	Cyclopropane fatty acyl phospholipid synthase	COG:COG2230:Cfa Cyclopropane fatty-acyl-phospholipid synthase and related methyltransferases [Category:I%2C Aligned:96-371%2C Eval:6.7e-124%2C score:356.2],MGA_1		77.0	100.0	100.0				re_detected by BLAST search
OUT-0001.CM020819.1.5842557-5843229	OUT-0001	CM020819_1	5842557-5843229	Formica selysi	Formicinae	5843030	5843228	198	12	A0A5C7BP20	hypothetical protein	NA	NA	82.5	96.9	16.4	8.8e-25	NA	NA	re_detected by BLAST search
OUT-0001.CM020819.1.5842557-5843229	OUT-0001	CM020819_1	5842557-5843229	Formica selysi	Formicinae	5842557	5842746	189	4	NA	hypothetical protein	NA	NA	NA	NA	NA	NA	NA	NA	re_detected by BLAST search
OUT-0001.CM020819.1.5842557-5846272	OUT-0001	CM020819_1	5842557-5846272	Formica selysi	Formicinae	5843636	5845039	1403	23											directly classified as HQ candidate
OUT-0001.CM020819.1.5842557-5846272	OUT-0001	CM020819_1	5842557-5846272	Formica selysi	Formicinae	5844939	5845334	395	21				NA	NA	NA	NA	NA	NA	NA	directly classified as HQ candidate
OUT-0001.CM020819.1.5842557-5846272	OUT-0001	CM020819_1	5842557-5846272	Formica selysi	Formicinae	5843031	5843279	248	12	NA	NA	NA	NA	NA	NA	NA	NA	NA	NA	directly classified as HQ candidate
OUT-0001.CM020819.1.5842557-5846272	OUT-0001	CM020819_1	5842557-5846272	Formica selysi	Formicinae	5846074	5846272	198	4	NA	NA	NA	NA	NA	NA	NA	NA	NA	NA	directly classified as HQ candidate
OUT-0001.CM020819.1.5842557-5846272	OUT-0001	CM020819_1	5842557-5846272	Formica selysi	Formicinae	5842557	5842747	190	4	NA	NA	NA	NA	NA	NA	NA	NA	NA	NA	directly classified as HQ candidate
OUT-0001.CM020819.1.5845600-5846272	OUT-0001	CM020819_1	5845600-5846272	Formica selysi	Formicinae	5846073	5846271	198	4	A0A5C7BP20	hypothetical protein	NA	NA	82.5	96.9	16.4	8.8e-25	NA	NA	re_detected by BLAST search
OUT-0001.CM020819.1.5845600-5846272	OUT-0001	CM020819_1	5845600-5846272	Formica selysi	Formicinae	5845600	5845669	69	2	NA	hypothetical protein	NA	NA	NA	NA	NA	NA	NA	NA	re_detected by BLAST search
OUT-0001.CM020829.1.3349325-3349575	OUT-0001	CM020829_1	3349325-3349575	Formica selysi	Formicinae	3349325	3349543	218	0	NA	NA	NA	NA	NA	NA	NA	NA	NA	NA	directly classified as HQ candidate
OUT-0001.WHNR01000088.1.32800-34183	OUT-0001	WHNR01000088_1	32800-34183	Formica selysi	Formicinae	32808	33488	680	0	A0A151ULI1	hypothetical protein	COG:COG2230:Cfa Cyclopropane fatty-acyl-phospholipid synthase and related methyltransferases [Category:I%2C Aligned:1-215%2C Eval:1.0e-99%2C score:288.4%2C N-term missing],MGA_1	TIGR:TIGR01983%3B UbiG: 3-demethylubiquinone-9 3-O-methyltransferase [Name:TIGR01983%2C Eval:5.4e-08%2C score:30.4%2C bias:0.0],COG:COG2230:Cfa Cyclopropane fatty-acyl-phospholipid synthase and related methyltransferases [Category:I%2C Aligned:1-215%2C Eval:1.0e-99%2C score:288.4%2C N-term missing],MGA_1	81.4	100.0	59.0	1.2e-113	ATG	TGA	directly classified as HQ candidate
OUT-0001.WHNR01000088.1.32800-34183	OUT-0001	WHNR01000088_1	32800-34183	Formica selysi	Formicinae	33619	33912	293	0	A0A151ULI1	hypothetical protein	NA	NA	80.5	84.5	21.4	4.2e-35	ATG	TAA	directly classified as HQ candidate
OUT-0002.Scaffold1.173150-173918	OUT-0002	Scaffold1	173150-173918	Formica cinerea	Formicinae	173584	173763	179	0	NA	NA	NA	NA	NA	NA	NA	NA	NA	NA	directly classified as HQ candidate
OUT-0002.Scaffold1.173150-173918	OUT-0002	Scaffold1	173150-173918	Formica cinerea	Formicinae	173801	173918	117	0	NA	NA	NA	NA	NA	NA	NA	NA	NA	NA	directly classified as HQ candidate
OUT-0002.Scaffold13.1195512-1196725	OUT-0002	Scaffold13	1195512-1196725	Formica cinerea	Formicinae	1196065	1196673	608	3	A0A151ULI1	hypothetical protein	COG:COG2230:Cfa Cyclopropane fatty-acyl-phospholipid synthase and related methyltransferases [Category:I%2C Aligned:1-137%2C Eval:2.9e-58%2C score:182.1%2C C-term missing],MGA_2	TIGR:TIGR01983%3B UbiG: 3-demethylubiquinone-9 3-O-methyltransferase [Name:TIGR01983%2C Eval:8.8e-07%2C score:26.4%2C bias:0.0],COG:COG2230:Cfa Cyclopropane fatty-acyl-phospholipid synthase and related methyltransferases [Category:I%2C Aligned:1-137%2C Eval:2.9e-58%2C score:182.1%2C C-term missing],MGA_2	80.4	68.3	36.0	2.6e-64	ATG	TGA	directly classified as HQ candidate
OUT-0002.Scaffold13.1195512-1196725	OUT-0002	Scaffold13	1195512-1196725	Formica cinerea	Formicinae	1195718	1196068	350	0	A0A2N5ESX5	hypothetical protein	NA	NA	73.5	100.0	30.5	2.2e-47	GTG	TGA	directly classified as HQ candidate
OUT-0002.Scaffold13.1199847-1201065	OUT-0002	Scaffold13	1199847-1201065	Formica cinerea	Formicinae	1200401	1200736	335	0	A0A151ULI1	hypothetical protein	COG:COG2230:Cfa Cyclopropane fatty-acyl-phospholipid synthase and related methyltransferases [Category:I%2C Aligned:1-111%2C Eval:1.7e-49%2C score:155.9%2C C-term missing],MGA_2	NA	79.3	100.0	29.0	1.3e-49	ATG	TAG	directly classified as HQ candidate
OUT-0002.Scaffold13.1199847-1201065	OUT-0002	Scaffold13	1199847-1201065	Formica cinerea	Formicinae	1200873	1201064	191	2	NA	hypothetical protein	NA	NA	NA	NA	NA	NA	GAG	TAA	directly classified as HQ candidate
OUT-0002.Scaffold13.1199847-1201065	OUT-0002	Scaffold13	1199847-1201065	Formica cinerea	Formicinae	1200156	1200335	179	0	NA	hypothetical protein	NA	NA	NA	NA	NA	NA	ATG	TAA	directly classified as HQ candidate
OUT-0002.Scaffold13.1204192-1205409	OUT-0002	Scaffold13	1204192-1205409	Formica cinerea	Formicinae	1204745	1205080	335	0	A0A151ULI1	hypothetical protein	NA	NA	79.3	100.0	29.0	1.8e-49	ATG	TAG	directly classified as HQ candidate
OUT-0002.Scaffold13.1204192-1205409	OUT-0002	Scaffold13	1204192-1205409	Formica cinerea	Formicinae	1204253	1204510	257	0	A0A151ULI1	hypothetical protein	NA	NA	72.8	95.3	21.1	2.4e-30	ATG	TAA	directly classified as HQ candidate
OUT-0002.Scaffold13.1204192-1205409	OUT-0002	Scaffold13	1204192-1205409	Formica cinerea	Formicinae	1205211	1205408	197	0	A0A2N5ESX5	hypothetical protein	NA	NA	76.6	97.0	16.7	4.2e-27	TTG	CTC	directly classified as HQ candidate
OUT-0002.Scaffold13.1204192-1205409	OUT-0002	Scaffold13	1204192-1205409	Formica cinerea	Formicinae	1204500	1204679	179	0	NA	hypothetical protein	NA	NA	NA	NA	NA	NA	ATG	TAA	directly classified as HQ candidate
OUT-0002.Scaffold14.831336-831605	OUT-0002	Scaffold14	831336-831605	Formica cinerea	Formicinae	831336	831404	68	3	NA	NA	NA	NA	NA	NA	NA	NA	NA	NA	directly classified as HQ candidate
OUT-0002.Scaffold21.1673684-1673934	OUT-0002	Scaffold21	1673684-1673934	Formica cinerea	Formicinae	1673684	1673902	218	0	NA	NA	NA	NA	NA	NA	NA	NA	NA	NA	directly classified as HQ candidate
OUT-0002.Scaffold3.1911484-1912377	OUT-0002	Scaffold3	1911484-1912377	Formica cinerea	Formicinae	1911484	1912185	701	484			NA	NA	NA	NA	NA	NA	NA	NA	directly classified as HQ candidate
OUT-0002.Scaffold3.1911484-1912377	OUT-0002	Scaffold3	1911484-1912377	Formica cinerea	Formicinae	1912318	1912377	59	33	NA	NA	NA	NA	NA	NA	NA	NA	NA	NA	directly classified as HQ candidate
OUT-0002.Scaffold4.8850598-8853022	OUT-0002	Scaffold4	8850598-8853022	Formica cinerea	Formicinae	8850854	8851768	914	0	A0A151ULI1	hypothetical protein	COG:COG2230:Cfa Cyclopropane fatty-acyl-phospholipid synthase and related methyltransferases [Category:I%2C Aligned:96-284%2C Eval:8.6e-85%2C score:253.7%2C C-term missing],MGA_2	TIGR:TIGR01983%3B UbiG: 3-demethylubiquinone-9 3-O-methyltransferase [Name:TIGR01983%2C Eval:1.8e-08%2C score:31.9%2C bias:0.0],COG:COG2230:Cfa Cyclopropane fatty-acyl-phospholipid synthase and related methyltransferases [Category:I%2C Aligned:96-284%2C Eval:8.6e-85%2C score:253.7%2C C-term missing],MGA_2	77.4	93.8	74.9	1.5e-132			re_detected by BLAST search
OUT-0002.Scaffold4.8850598-8853022	OUT-0002	Scaffold4	8850598-8853022	Formica cinerea	Formicinae	8851813	8852628	815	3	A0A151ULI1	hypothetical protein	COG:COG2230:Cfa Cyclopropane fatty-acyl-phospholipid synthase and related methyltransferases [Category:I%2C Aligned:47-255%2C Eval:6.6e-93%2C score:273.0%2C C-term missing],MGA_3	TIGR:TIGR01983%3B UbiG: 3-demethylubiquinone-9 3-O-methyltransferase [Name:TIGR01983%2C Eval:4.8e-09%2C score:33.8%2C bias:0.0],COG:COG2230:Cfa Cyclopropane fatty-acyl-phospholipid synthase and related methyltransferases [Category:I%2C Aligned:47-255%2C Eval:6.6e-93%2C score:273.0%2C C-term missing],MGA_3	78.2	94.5	67.1	7.5e-122			re_detected by BLAST search
OUT-0002.Scaffold4.8850598-8853022	OUT-0002	Scaffold4	8850598-8853022	Formica cinerea	Formicinae	8850598	8850741	143	0	NA	hypothetical protein	NA	NA	NA	NA	NA	NA	NA	NA	re_detected by BLAST search
OUT-0002.Scaffold4.8850598-8853022	OUT-0002	Scaffold4	8850598-8853022	Formica cinerea	Formicinae	8852888	8853021	133	17	NA	hypothetical protein	NA	NA	NA	NA	NA	NA	NA	NA	re_detected by BLAST search
OUT-0002.Scaffold4.8855059-8856542	OUT-0002	Scaffold4	8855059-8856542	Formica cinerea	Formicinae	8855799	8856541	742	0	A0A151ULI1	hypothetical protein	COG:COG2230:Cfa Cyclopropane fatty-acyl-phospholipid synthase and related methyltransferases [Category:I%2C Aligned:22-230%2C Eval:3.9e-93%2C score:272.6%2C C-term missing],MGA_2	TIGR:TIGR01983%3B UbiG: 3-demethylubiquinone-9 3-O-methyltransferase [Name:TIGR01983%2C Eval:4.8e-09%2C score:33.8%2C bias:0.0],COG:COG2230:Cfa Cyclopropane fatty-acyl-phospholipid synthase and related methyltransferases [Category:I%2C Aligned:22-230%2C Eval:3.9e-93%2C score:272.6%2C C-term missing],MGA_2	77.9	93.5	60.3	1.2e-107	CAT	TAA	directly classified as HQ candidate
OUT-0002.Scaffold4.8855059-8856542	OUT-0002	Scaffold4	8855059-8856542	Formica cinerea	Formicinae	8855086	8855265	179	0	NA	hypothetical protein	NA	NA	NA	NA	NA	NA	ATG	TAA	directly classified as HQ candidate
OUT-0002.Scaffold42.419451-420884	OUT-0002	Scaffold42	419451-420884	Formica cinerea	Formicinae	419730	420878	1148	62	A0A151ULI1	Cyclopropane fatty acyl phospholipid synthase	COG:COG2230:Cfa Cyclopropane fatty-acyl-phospholipid synthase and related methyltransferases [Category:I%2C Aligned:96-371%2C Eval:2.1e-130%2C score:372.7],MGA_2		81.7	100.0	100.0				re_detected by BLAST search
OUT-0002.Scaffold42.419451-420884	OUT-0002	Scaffold42	419451-420884	Formica cinerea	Formicinae	419451	419519	68	1	NA	hypothetical protein	NA	NA	NA	NA	NA	NA	NA	NA	re_detected by BLAST search
OUT-0002.Scaffold5.1001991-1005871	OUT-0002	Scaffold5	1001991-1005871	Formica cinerea	Formicinae	1001997	1002557	560	18				NA	NA	NA	NA	NA	NA	NA	directly classified as HQ candidate
OUT-0002.Scaffold5.1001991-1005871	OUT-0002	Scaffold5	1001991-1005871	Formica cinerea	Formicinae	1004669	1005031	362	47	NA	NA	NA	NA	NA	NA	NA	NA	NA	NA	directly classified as HQ candidate
OUT-0002.Scaffold5.1001991-1005871	OUT-0002	Scaffold5	1001991-1005871	Formica cinerea	Formicinae	1005356	1005658	302	20	NA	NA	NA	NA	NA	NA	NA	NA	NA	NA	directly classified as HQ candidate
OUT-0002.Scaffold5.1001991-1005871	OUT-0002	Scaffold5	1001991-1005871	Formica cinerea	Formicinae	1002557	1002775	218	1	NA	NA	NA	NA	NA	NA	NA	NA	NA	NA	directly classified as HQ candidate
OUT-0002.Scaffold5.1001991-1005871	OUT-0002	Scaffold5	1001991-1005871	Formica cinerea	Formicinae	1002896	1003105	209	11	NA	NA	NA	NA	NA	NA	NA	NA	NA	NA	directly classified as HQ candidate
OUT-0002.Scaffold5.1001991-1005871	OUT-0002	Scaffold5	1001991-1005871	Formica cinerea	Formicinae	1005698	1005871	173	30	NA	NA	NA	NA	NA	NA	NA	NA	NA	NA	directly classified as HQ candidate
OUT-0002.Scaffold5.1001991-1005871	OUT-0002	Scaffold5	1001991-1005871	Formica cinerea	Formicinae	1004134	1004283	149	26	NA	NA	NA	NA	NA	NA	NA	NA	NA	NA	directly classified as HQ candidate
OUT-0002.Scaffold5.1001991-1005871	OUT-0002	Scaffold5	1001991-1005871	Formica cinerea	Formicinae	1004255	1004386	131	40	NA	NA	NA	NA	NA	NA	NA	NA	NA	NA	directly classified as HQ candidate
OUT-0002.Scaffold5.1001991-1005871	OUT-0002	Scaffold5	1001991-1005871	Formica cinerea	Formicinae	1003979	1004104	125	23	NA	NA	NA	NA	NA	NA	NA	NA	NA	NA	directly classified as HQ candidate
OUT-0002.Scaffold5.1001991-1005871	OUT-0002	Scaffold5	1001991-1005871	Formica cinerea	Formicinae	1003835	1003954	119	14	NA	NA	NA	NA	NA	NA	NA	NA	NA	NA	directly classified as HQ candidate
OUT-0002.Scaffold91.308662-309463	OUT-0002	Scaffold91	308662-309463	Formica cinerea	Formicinae	308662	308793	131	0	NA	NA	NA	NA	NA	NA	NA	NA	NA	NA	directly classified as HQ candidate
OUT-0002.Scaffold91.308662-309463	OUT-0002	Scaffold91	308662-309463	Formica cinerea	Formicinae	309215	309340	125	0	NA	NA	NA	NA	NA	NA	NA	NA	NA	NA	directly classified as HQ candidate
OUT-0002.Scaffold92.25861-27286	OUT-0002	Scaffold92	25861-27286	Formica cinerea	Formicinae	25869	26549	680	3	A0A151ULI1	hypothetical protein	COG:COG2230:Cfa Cyclopropane fatty-acyl-phospholipid synthase and related methyltransferases [Category:I%2C Aligned:1-215%2C Eval:2.1e-100%2C score:290.3%2C N-term missing],MGA_1	TIGR:TIGR01983%3B UbiG: 3-demethylubiquinone-9 3-O-methyltransferase [Name:TIGR01983%2C Eval:6.5e-08%2C score:30.1%2C bias:0.0],COG:COG2230:Cfa Cyclopropane fatty-acyl-phospholipid synthase and related methyltransferases [Category:I%2C Aligned:1-215%2C Eval:2.1e-100%2C score:290.3%2C N-term missing],MGA_1	81.9	100.0	59.0	9.5e-114	NA	NA	re_detected by BLAST search
OUT-0002.Scaffold92.25861-27286	OUT-0002	Scaffold92	25861-27286	Formica cinerea	Formicinae	26595	27014	419	0	A0A151ULI1	hypothetical protein	NA	NA	78.0	100.0	36.8	1.4e-59	NA	NA	re_detected by BLAST search
