# Supplementary material for: Recurrent horizontal gene acquisition in the evolutionary history of ants
Source: Research Square preprint supplement (doi:10.21203/rs.3.rs-5741203/v1), 2025-01-13
Supplement: Supplementary file 5 [file ab6fd134ce95dc849b6f4017.xlsx]

## Sheet: Etherases
locusID	.id	locus.scaffold	species	subfamily	CDS.start	CDS.end	CDS.length	Expression	CDS.UniprotIDs	Protein.names	CDS.q_cov	CDS.s_covs	CDS.startCodon	CDS.stopCodon	note
GAGA-0200.Scaffold111.362774-364682	GAGA-0200	Scaffold111	Camponotus japonicus	Formicinae	363210	364118	909	11895	A0A0H3XH70	N-acetylmuramic acid 6-phosphate etherase	98.7	99	ATG	TAA	HQ-candidate
GAGA-0221.Scaffold3.8820002-8820310	GAGA-0221	Scaffold3	Camponotus fellah	Formicinae	8819326	8820234	909	5603	A0A0H3XH70	N-acetylmuramic acid 6-phosphate etherase	98.7	99	ATG	TAA	HQ-candidate
GAGA-0360.Scaffold16.5909048-5910576	GAGA-0360	Scaffold16	Colobopsis sp.	Formicinae	5909052	5909960	909	NA	NA	NA	NA	NA	ATG	TAA	manually filtered out
GAGA-0361.Scaffold4.3723812-3724743	GAGA-0361	Scaffold4	Camponotus fedtschenkoi	Formicinae	3723826	3724734	909	NA	Q6MTZ7	N-acetylmuramic acid 6-phosphate etherase	NA	NA	ATG	TAA	manually filtered out
GAGA-0362.Scaffold15.5724696-5725632	GAGA-0362	Scaffold15	Camponotus sp.	Formicinae	5724715	5725623	909	NA	Q6MTZ7	N-acetylmuramic acid 6-phosphate etherase	NA	NA	ATG	TAA	filtered out by e-value threshold filter
GAGA-0374.Scaffold20.2858962-2859996	GAGA-0374	Scaffold20	Polyrhachis ilaudata	Formicinae	2858966	2859874	909	NA	Q6MTZ7	N-acetylmuramic acid 6-phosphate etherase	NA	NA	ATG	TAA	manually filtered out
GAGA-0396.Scaffold28.2026294-2027752	GAGA-0396	Scaffold28	Camponotus singularis	Formicinae	2026308	2027216	909	NA	Q6MTZ7	N-acetylmuramic acid 6-phosphate etherase	NA	NA	ATG	TAA	manually filtered out
NCBI-0005.NW_020229769.1.103912-105724	NCBI-0005	NW_020229769_1	Camponotus floridanus	Formicinae	104332	105240	909	1286	A0A0H3XH70	N-acetylmuramic acid 6-phosphate etherase	98.7	99	ATG	TAA	HQ-candidate
