# Supplementary material for: Recurrent horizontal gene acquisition in the evolutionary history of ants
Source: Research Square preprint supplement (doi:10.21203/rs.3.rs-5741203/v1), 2025-01-13
Supplement: Supplementary file 6 [file c162b6332ce257a40eafe782.xlsx]

## Sheet: Sheet 1
locusID	.id	species	subfamily	assembly_qual	predicted_protein	prokaryote_origin	order_prokaryote_origin	class_prokaryote_origin	locus.scaffold	locus.start	locus.end	cand.locus	cand.start	cand.end	bestProHit	BitDiffSum	gc	reads_start	reads_end	nr_predicted_loci
GAGA-0001.Scaffold27.1045954-1099000	GAGA-0001	Acromyrmex ameliae	Myrmicinae	PacBio	NA	NA	NA	NA	Scaffold27	1045954	1099000	Scaffold27:1065954-1076186;Scaffold27:1076455-1077670;Scaffold27:1078400-1078537;Scaffold27:1078655-1079000	1065954;1076455;1078400;1078655	1076186;1077670;1078537;1079000	AP013028.1;22579;23385;3.145E-181;643;821;77.200;Wolbachia endosymbiont of Cimex lectularius;CP003883.1;244405;245428;0.000E+00;1081;1046;82.300;Wolbachia endosymbiont of Drosophila simulans wNo;CP003883.1;592465;592604;7.438E-20;107;140;78.300;Wolbachia endosymbiont of Drosophila simulans wNo;CP001391.1;1136448;1136799;1.154E-71;279;352;77.000;Wolbachia sp. wRi	51024;908;210;1429	0.32359265050821;0.339917695473251;0.35036496350365;0.31304347826087	42;NA	38;NA	4
GAGA-0003.Scaffold3.25090829-25131350	GAGA-0003	Acromyrmex subterraneus	Myrmicinae	Chromosome level	NA	NA	NA	NA	Scaffold3	25090829	25131350	Scaffold3:25110829-25111350	25110829	25111350	AM999887.1;248017;248542;1.230E-142;515;526;81.700;Wolbachia endosymbiont of Culex quinquefasciatus Pel	2692	0.3243762	NA	NA	1
GAGA-0003.Scaffold3.24013063-24068552	GAGA-0003	Acromyrmex subterraneus	Myrmicinae	Chromosome level	NA	NA	NA	NA	Scaffold3	24013063	24068552	Scaffold3:24033063-24033583;Scaffold3:24033701-24033837;Scaffold3:24034567-24035771;Scaffold3:24036043-24048552	24033063;24033701;24034567;24036043	24033583;24033837;24035771;24048552	AM999887.1;248017;248542;5.503E-144;519;526;81.900;Wolbachia endosymbiont of Culex quinquefasciatus Pel;CP003883.1;592465;592603;2.577E-19;105;139;78.100;Wolbachia endosymbiont of Drosophila simulans wNo;AM999887.1;1125823;1126289;1.113E-78;302;467;73.200;Wolbachia endosymbiont of Culex quinquefasciatus Pel;AM999887.1;1025435;1026426;0.000E+00;1198;992;87.200;Wolbachia endosymbiont of Culex quinq…	2115;206;1394;60433	0.325;0.352941176470588;0.343853820598007;0.322407866336238	NA	NA	4
GAGA-0003.Scaffold3.25091501-25153221	GAGA-0003	Acromyrmex subterraneus	Myrmicinae	Chromosome level	NA	NA	NA	NA	Scaffold3	25091501	25153221	Scaffold3:25111501-25111607;Scaffold3:25112341-25114224;Scaffold3:25114343-25116634;Scaffold3:25116763-25128620;Scaffold3:25128971-25133221	25111501;25112341;25114343;25116763;25128971	25111607;25114224;25116634;25128620;25133221	CP003883.1;592465;592572;2.226E-13;86;108;78.100;Wolbachia endosymbiont of Drosophila simulans wNo;AM999887.1;282023;283173;0.000E+00;1153;1160;81.000;Wolbachia endosymbiont of Culex quinquefasciatus Pel;AM999887.1;297505;297996;4.000E-71;277;492;72.700;Wolbachia endosymbiont of Culex quinquefasciatus Pel;CP003883.1;242410;243683;0.000E+00;1304;1274;82.800;Wolbachia endosymbiont of Drosophila sim…	87;2314;15291;74635;21657	0.330188679245283;0.343600637280935;0.309908336970755;0.345449945180062;0.316235294117647	NA	NA	5
GAGA-0004.Scaffold3.17243517-17323186	GAGA-0004	Messor barbarus	Myrmicinae	Chromosome level	NA	NA	NA	NA	Scaffold3	17243517	17323186	Scaffold3:17302207-17303186	17302207	17303186	CP001391.1;741628;742411;1.201E-271;943;795;86.500;Wolbachia sp. wRi	463	0.304392237	NA	NA	1
GAGA-0004.Scaffold1.51874244-51914932	GAGA-0004	Messor barbarus	Myrmicinae	Chromosome level	NA	NA	NA	NA	Scaffold1	51874244	51914932	Scaffold1:51894244-51894932	51894244	51894932	CP003884.1;461603;462295;1.726E-62;249;693;68.600;Wolbachia endosymbiont of Drosophila simulans wHa	161	0.406976744	NA	NA	1
GAGA-0004.Scaffold14.50730-124464	GAGA-0004	Messor barbarus	Myrmicinae	Chromosome level	NA	NA	NA	NA	Scaffold14	50730	124464	Scaffold14:100812-101158;Scaffold14:102644-102815;Scaffold14:103917-104464;Scaffold14:70730-70908;Scaffold14:74718-74851;Scaffold14:75924-76499;Scaffold14:77157-77384	100812;102644;103917;70730;74718;75924;77157	101158;102815;104464;70908;74851;76499;77384	CP003884.1;270076;270436;1.437E-29;139;361;69.600;Wolbachia endosymbiont of Drosophila simulans wHa;CP001391.1;721682;721854;1.856E-31;146;173;78.600;Wolbachia sp. wRi;AM999887.1;497203;497745;1.113E-78;302;549;72.100;Wolbachia endosymbiont of Culex quinquefasciatus Pel;CP003883.1;60864;61044;1.995E-17;99;181;72.900;Wolbachia endosymbiont of Drosophila simulans wNo;CP001391.1;721682;721816;3.097E…	239;147;303;100;159;278;135	0.277456647398844;0.333333333333333;0.290676416819013;0.252808988764045;0.300751879699248;0.285217391304348;0.268722466960352	NA;16;27;26;25;20	NA;16;27;25;24;20	7
GAGA-0004.Scaffold210.9972-58983	GAGA-0004	Messor barbarus	Myrmicinae	Chromosome level	NA	NA	NA	NA	Scaffold210	9972	58983	Scaffold210:29972-30708;Scaffold210:31260-32414;Scaffold210:33218-36170;Scaffold210:36643-38066;Scaffold210:38773-38937;Scaffold210:43549-43705;Scaffold210:47488-49250;Scaffold210:49703-51232;Scaffold210:51460-52117;Scaffold210:57717-58052;Scaffold210:58228-58463	29972;31260;33218;36643;38773;43549;47488;49703;51460;57717;58228	30708;32414;36170;38066;38937;43705;49250;51232;52117;58052;58463	AF074611.1;17459;17987;3.718E-68;268;529;71.500;Yersinia pestis KIM10+;AL117211.1;29079;29819;1.031E-109;406;742;73.000;Yersinia pestis CO92;CP003223.1;77014;78724;8.206E-291;1007;1725;73.500;Klebsiella pneumoniae subsp. pneumoniae HS11286;AF074611.1;23863;25207;8.121E-186;658;1349;72.500;Yersinia pestis KIM10+;CP003223.1;73020;73173;1.335E-26;130;154;78.500;Klebsiella pneumoniae subsp. pneumonia…	1906;1229;6975;2190;239;208;1860;2225;157;287;158	0.487771739130435;0.500866551126516;0.486111111111111;0.491918482080112;0.524390243902439;0.506410256410256;0.490351872871737;0.497056899934598;0.487062404870624;0.53134328358209;0.48936170212766	4;NA;3;2	4;NA;3;2	11
GAGA-0014.Scaffold13.0-48887	GAGA-0014	Acromyrmex echinatior	Myrmicinae	Chromosome level	NA	NA	NA	NA	Scaffold13	0	48887	Scaffold13:1132-2045;Scaffold13:13-537;Scaffold13:13581-14328;Scaffold13:14650-14873;Scaffold13:15372-16513;Scaffold13:21201-21838;Scaffold13:21947-22287;Scaffold13:2297-2969;Scaffold13:24771-25868;Scaffold13:28284-28887;Scaffold13:6197-7169;Scaffold13:8163-9055;Scaffold13:9965-10220	1132;13;13581;14650;15372;21201;21947;2297;24771;28284;6197;8163;9965	2045;537;14328;14873;16513;21838;22287;2969;25868;28887;7169;9055;10220	CP006644.1;1955738;1956539;5.557E-59;237;802;67.200;Sphingomonas sanxanigenens DSM 19645 = NX02;CP009122.1;4741984;4742509;1.604E-59;239;526;71.100;Sphingopyxis fribergensis;CP013342.1;1522945;1523105;2.068E-10;76;161;71.500;Sphingopyxis terrae subsp. terrae NBRC 15098;AP010803.1;2611498;2611721;6.912E-17;97;224;70.200;Sphingobium japonicum UT26S;CP012640.2;2639582;2639891;7.720E-30;140;312;70.90…	558;1946;544;216;9266;372;193;2244;1432;7904;20006;1361;81	0.648411829134721;0.635496183206107;0.673360107095047;0.650224215246637;0.643295354951797;0.615384615384615;0.626470588235294;0.633928571428571;0.612579762989973;0.600331674958541;0.660493827160494;0.673766816143498;0.643137254901961	NA;4;8;0;6	NA;4;9;0;5	13
GAGA-0014.Scaffold13.5456894-5612004	GAGA-0014	Acromyrmex echinatior	Myrmicinae	Chromosome level	NA	NA	NA	NA	Scaffold13	5456894	5612004	Scaffold13:5476894-5477113;Scaffold13:5480937-5481718;Scaffold13:5482080-5482597;Scaffold13:5482703-5484279;Scaffold13:5484466-5487886;Scaffold13:5488060-5488653;Scaffold13:5489298-5491410;Scaffold13:5491542-5491903;Scaffold13:5492412-5493664;Scaffold13:5493840-5498488;Scaffold13:5498830-5501271;Scaffold13:5502134-5502520;Scaffold13:5503384-5506127;Scaffold13:5506512-5506669;Scaffold13:5506832-55…	5476894;5480937;5482080;5482703;5484466;5488060;5489298;5491542;5492412;5493840;5498830;5502134;5503384;5506512;5506832;5509270;5511481;5512321;5514132;5515643;5516085;5517774;5519758;5520556;5522117;5524006;5527730;5529154;5529400;5533947;5534952;5536744;5542360;5543354;5544655;5545891;5547250;5549906;5550794;5551300;5554382;5556070;5560748;5561433;5562815;5563475;5563881;5565542;5567243;5569646…	5477113;5481718;5482597;5484279;5487886;5488653;5491410;5491903;5493664;5498488;5501271;5502520;5506127;5506669;5508365;5511317;5511909;5514012;5515441;5515964;5517627;5519655;5520271;5521836;5523821;5526500;5528721;5529266;5530398;5534494;5536097;5538417;5542602;5543778;5545261;5546562;5547919;5550642;5551182;5552526;5554883;5560035;5561214;5562606;5563135;5563736;5564838;5566238;5568607;5570012…	AM747720.1;2557413;2557632;3.329E-21;112;221;73.800;Burkholderia cenocepacia J2315;CP001804.1;3380210;3380744;1.544E-15;93;535;65.800;Haliangium ochraceum DSM 14365;CM001490.1;6406248;6406766;2.580E-36;162;519;67.300;Pseudomonas chlororaphis O6;AP012224.1;2872784;2872948;1.788E-21;113;168;75.000;Pseudogulbenkiania sp. NH8B;CP000555.1;3827474;3828185;5.550E-93;350;712;72.100;Methylibium petroleiph…	113;2050;3337;26260;275419;2635;86528;164;92357;321383;77039;274;339199;3824;57349;168947;6540;18755;33754;671;54388;113628;582;7947;33479;37783;59447;117;3751;638;83434;63599;2668;847;601;11858;388;7378;1972;58998;18322;123825;377;5938;11642;27550;17046;4116;29586;2986;7417;18169;1743;104478;32881;213989;129;2207;116133;1912;97316;41680;784;18507;10407;548733;473;1497;2756	0.662100456621005;0.71830985915493;0.702127659574468;0.651015228426396;0.705263157894737;0.693086003372681;0.68655303030303;0.6398891966759;0.692492012779553;0.692125645438898;0.705038918476034;0.743523316062176;0.683558148013124;0.707006369426752;0.754076973255055;0.680996580361505;0.714953271028037;0.688350088704908;0.686783804430863;0.682242990654206;0.681582360570687;0.664540138224349;0.67056…	0;NA;10;6;17;13;12;4;3;2;7	0;NA;8;6;7;17;13;12;11;9;4;3;2	69
GAGA-0020.Scaffold1.5302877-5343044	GAGA-0020	Lasius flavus s2	Formicinae	Chromosome level	NA	Wolbachia	Rickettsiales	Alphaproteobacteria	Scaffold1	5302877	5343044	Scaffold1:5322877-5323044	5322877	5323044	CP003884.1;838482;838648;6.431E-31;144;168;79.500;Wolbachia endosymbiont of Drosophila simulans wHa	290	0.275449102	64	64	1
GAGA-0020.Scaffold384.14726-55207	GAGA-0020	Lasius flavus s2	Formicinae	Chromosome level	NA	NA	NA	NA	Scaffold384	14726	55207	Scaffold384:34726-35207	34726	35207	CP001391.1;740947;741222;8.310E-67;263;276;81.100;Wolbachia sp. wRi	570	0.332640333	15	14	1
GAGA-0020.Scaffold384.11023-51644	GAGA-0020	Lasius flavus s2	Formicinae	Chromosome level	NA	NA	NA	NA	Scaffold384	11023	51644	Scaffold384:31023-31644	31023	31644	CP001391.1;737992;738497;1.386E-70;276;506;72.900;Wolbachia sp. wRi	219	0.331723027	NA	NA	1
GAGA-0020.Scaffold107.124838-167367	GAGA-0020	Lasius flavus s2	Formicinae	Chromosome level	ankyrin_repeat_protein	Wolbachia	Rickettsiales	Alphaproteobacteria	Scaffold107	124838	167367	Scaffold107:144838-145293;Scaffold107:145511-145933;Scaffold107:147046-147367	144838;145511;147046	145293;145933;147367	CP001391.1;740576;741023;2.486E-77;298;457;74.700;Wolbachia sp. wRi;CP001391.1;740619;741033;2.775E-73;285;424;75.200;Wolbachia sp. wRi;CP001391.1;740696;741018;1.198E-64;256;323;77.800;Wolbachia sp. wRi	299;286;257	0.356043956043956;0.372037914691943;0.367601246105919	NA;76	NA;75	3
GAGA-0020.Scaffold17.136258-179230	GAGA-0020	Lasius flavus s2	Formicinae	Chromosome level	ankyrin_repeat_protein	Wolbachia	Rickettsiales	Alphaproteobacteria	Scaffold17	136258	179230	Scaffold17:156258-156500;Scaffold17:157599-157940;Scaffold17:158232-158573;Scaffold17:158693-159230	156258;157599;158232;158693	156500;157940;158573;159230	CP001391.1;741186;741441;2.398E-67;265;256;82.800;Wolbachia sp. wRi;CP001391.1;740691;741033;1.154E-71;279;343;78.400;Wolbachia sp. wRi;CP001391.1;740691;741033;1.034E-75;293;343;79.300;Wolbachia sp. wRi;CP001391.1;737672;738231;6.904E-102;380;560;75.100;Wolbachia sp. wRi	266;280;294;259	0.338842975206612;0.366568914956012;0.363636363636364;0.297951582867784	69;NA	69;NA	4
GAGA-0020.Scaffold43.0-41639	GAGA-0020	Lasius flavus s2	Formicinae	Chromosome level	NA	NA	NA	NA	Scaffold43	0	41639	Scaffold43:15725-16283;Scaffold43:16680-17637;Scaffold43:18001-18521;Scaffold43:21146-21639	15725;16680;18001;21146	16283;17637;18521;21639	CP001391.1;737673;738241;5.150E-107;397;569;75.700;Wolbachia sp. wRi;CP001391.1;739574;740000;1.714E-130;474;427;85.000;Wolbachia sp. wRi;CP001391.1;740187;740525;1.113E-61;246;339;76.100;Wolbachia sp. wRi;CP001391.1;740941;741441;1.973E-153;551;501;84.600;Wolbachia sp. wRi	398;713;386;293	0.299283154121864;0.35423197492163;0.346153846153846;0.324543610547667	NA;95	NA;92	4
GAGA-0020.Scaffold17.208193-251646	GAGA-0020	Lasius flavus s2	Formicinae	Chromosome level	NA	NA	NA	NA	Scaffold17	208193	251646	Scaffold17:228193-228494;Scaffold17:229611-229952;Scaffold17:230661-231646	228193;229611;230661	228494;229952;231646	CP001391.1;740731;741033;6.921E-68;267;303;79.500;Wolbachia sp. wRi;CP001391.1;740691;741033;1.113E-78;302;343;79.500;Wolbachia sp. wRi;CP001391.1;740691;741033;2.486E-77;298;343;79.300;Wolbachia sp. wRi	268;303;575	0.338870431893688;0.351906158357771;0.315736040609137	59;60;63	59;65	3
GAGA-0020.Scaffold42.5702-48653	GAGA-0020	Lasius flavus s2	Formicinae	Chromosome level	ankyrin_repeat_protein	Wolbachia	Rickettsiales	Alphaproteobacteria	Scaffold42	5702	48653	Scaffold42:25702-26502;Scaffold42:27001-27306;Scaffold42:28501-28653	25702;27001;28501	26502;27306;28653	CP001391.1;737684;737957;4.150E-47;198;274;75.800;Wolbachia sp. wRi;CP001391.1;740727;741033;2.149E-71;278;307;80.100;Wolbachia sp. wRi;CP001391.1;741285;741441;1.997E-34;156;157;82.100;Wolbachia sp. wRi	366;279;157	0.3125;0.380327868852459;0.296052631578947	NA;71	NA;71	3
GAGA-0020.Scaffold179.27743-71767	GAGA-0020	Lasius flavus s2	Formicinae	Chromosome level	NA	NA	NA	NA	Scaffold179	27743	71767	Scaffold179:47743-48084;Scaffold179:51296-51767	47743;51296	48084;51767	CP001391.1;740691;741033;6.921E-68;267;343;77.200;Wolbachia sp. wRi;CP001391.1;740947;741436;8.893E-121;442;490;80.400;Wolbachia sp. wRi	268;251	0.354838709677419;0.335456475583864	34;26	34;25	2
GAGA-0020.Scaffold31.522876-567130	GAGA-0020	Lasius flavus s2	Formicinae	Chromosome level	ankyrin_repeat_protein	Wolbachia	Rickettsiales	Alphaproteobacteria	Scaffold31	522876	567130	Scaffold31:542876-543348;Scaffold31:545363-545898;Scaffold31:546120-547130	542876;545363;546120	543348;545898;547130	CP001391.1;740964;741441;7.104E-146;526;478;84.700;Wolbachia sp. wRi;CP001391.1;740001;740537;1.230E-142;515;537;81.500;Wolbachia sp. wRi;CP001391.1;738276;738657;3.213E-62;248;382;74.800;Wolbachia sp. wRi	291;450;152	0.326271186440678;0.336448598130841;0.326732673267327	50;39;NA	50;38;NA	3
GAGA-0020.Scaffold267.35721-76766	GAGA-0020	Lasius flavus s2	Formicinae	Chromosome level	ankyrin_repeat_protein	Wolbachia	Rickettsiales	Alphaproteobacteria	Scaffold267	35721	76766	Scaffold267:55721-56000;Scaffold267:56425-56766	55721;56425	56000;56766	CP001391.1;741149;741441;1.287E-84;322;293;84.300;Wolbachia sp. wRi;CP001391.1;740691;741033;3.097E-69;271;343;77.500;Wolbachia sp. wRi	323;272	0.340501792114695;0.354838709677419	NA	NA	2
GAGA-0020.Scaffold31.593867-671311	GAGA-0020	Lasius flavus s2	Formicinae	Chromosome level	ankyrin_repeat_protein	Wolbachia	Rickettsiales	Alphaproteobacteria	Scaffold31	593867	671311	Scaffold31:613867-614622;Scaffold31:615008-615300;Scaffold31:616504-616833;Scaffold31:648280-648500;Scaffold31:649625-650178;Scaffold31:650515-651311	613867;615008;616504;648280;649625;650515	614622;615300;616833;648500;650178;651311	CP001391.1;737714;738500;3.673E-153;550;787;75.600;Wolbachia sp. wRi;CP001391.1;740740;741033;8.939E-70;273;294;80.600;Wolbachia sp. wRi;CP001391.1;740703;741033;7.180E-61;243;331;76.500;Wolbachia sp. wRi;CP001391.1;741208;741441;6.434E-65;257;234;84.100;Wolbachia sp. wRi;CP001391.1;740490;741033;1.604E-76;295;555;71.800;Wolbachia sp. wRi;CP001391.1;737673;738500;2.121E-156;560;828;75.200;Wolbach…	244;274;258;559;257	0.316556291390728;0.349315068493151;0.355623100303951;0.327272727272727;0.358047016274864;0.3178391959799	NA;73;37	NA;67;37	6
GAGA-0020.Scaffold38.638653-680450	GAGA-0020	Lasius flavus s2	Formicinae	Chromosome level	ankyrin_repeat_protein	Wolbachia	Rickettsiales	Alphaproteobacteria	Scaffold38	638653	680450	Scaffold38:658653-658998;Scaffold38:659461-659802;Scaffold38:659920-660450	658653;659461;659920	658998;659802;660450	CP001391.1;741081;741441;1.285E-101;379;361;83.100;Wolbachia sp. wRi;CP001391.1;740691;741033;1.726E-62;249;343;76.000;Wolbachia sp. wRi;CP001391.1;737687;738230;2.981E-93;351;544;74.300;Wolbachia sp. wRi	228;250;133	0.333333333333333;0.354838709677419;0.311320754716981	NA	NA	3
GAGA-0020.Scaffold17.657157-715246	GAGA-0020	Lasius flavus s2	Formicinae	Chromosome level	NA	NA	NA	NA	Scaffold17	657157	715246	Scaffold17:693196-693500;Scaffold17:694252-695246	693196;694252	693500;695246	CP001391.1;740731;741033;2.879E-66;261;306;79.000;Wolbachia sp. wRi;CP001391.1;740611;741033;3.097E-69;271;435;74.300;Wolbachia sp. wRi	262;554	0.351973684210526;0.339034205231388	79;NA	79;NA	2
GAGA-0020.Scaffold31.684726-728354	GAGA-0020	Lasius flavus s2	Formicinae	Chromosome level	ankyrin_repeat_protein	Wolbachia	Rickettsiales	Alphaproteobacteria	Scaffold31	684726	728354	Scaffold31:704726-705213;Scaffold31:706737-707000;Scaffold31:707367-708354	704726;706737;707367	705213;707000;708354	CP001391.1;740947;741441;3.417E-150;540;495;84.400;Wolbachia sp. wRi;CP001391.1;740759;741023;3.213E-62;248;265;80.700;Wolbachia sp. wRi;CP001391.1;740611;741023;3.097E-69;271;422;74.500;Wolbachia sp. wRi	282;249;620	0.340862422997947;0.357414448669202;0.333333333333333	49;NA	51;NA	3
GAGA-0024.Scaffold2.20279604-20320215	GAGA-0024	Lasius flavus s1	Formicinae	Chromosome level	NA	NA	NA	NA	Scaffold2	20279604	20320215	Scaffold2:20299604-20300215	20299604	20300215	CP001391.1;740578;740986;8.011E-40;174;409;71.800;Wolbachia sp. wRi	401	0.358428805	15	15	1
GAGA-0024.Scaffold4.14731348-14771515	GAGA-0024	Lasius flavus s1	Formicinae	Chromosome level	NA	Wolbachia	Rickettsiales	Alphaproteobacteria	Scaffold4	14731348	14771515	Scaffold4:14751348-14751515	14751348	14751515	CP003884.1;841434;841584;4.979E-29;138;152;80.600;Wolbachia endosymbiont of Drosophila simulans wHa	568	0.281437126	29	29	1
GAGA-0024.Scaffold272.0-34433	GAGA-0024	Lasius flavus s1	Formicinae	Chromosome level	NA	NA	NA	NA	Scaffold272	0	34433	Scaffold272:11745-12224;Scaffold272:15264-15605	11745;15264	12224;15605	CP001391.1;740947;741441;1.843E-133;484;495;81.800;Wolbachia sp. wRi;CP001391.1;740796;741033;2.399E-50;208;238;79.400;Wolbachia sp. wRi	489;468	0.334029227557411;0.357771260997067	35;58	46;23	2
GAGA-0024.Scaffold5.1558789-1601254	GAGA-0024	Lasius flavus s1	Formicinae	Chromosome level	NA	Wolbachia	Rickettsiales	Alphaproteobacteria	Scaffold5	1558789	1601254	Scaffold5:1578789-1579294;Scaffold5:1579437-1579778;Scaffold5:1581002-1581254	1578789;1579437;1581002	1579294;1579778;1581254	CP001391.1;737672;738190;1.435E-97;365;519;75.900;Wolbachia sp. wRi;CP001391.1;740691;741033;1.034E-75;293;343;79.300;Wolbachia sp. wRi;CP001391.1;740780;741033;2.488E-60;242;254;81.100;Wolbachia sp. wRi	73;548;243	0.297029702970297;0.363636363636364;0.353174603174603	NA;30;40	NA;31;41	3
GAGA-0024.Scaffold1.16519177-16565088	GAGA-0024	Lasius flavus s1	Formicinae	Chromosome level	ankyrin_repeat_protein	Wolbachia	Rickettsiales	Alphaproteobacteria	Scaffold1	16519177	16565088	Scaffold1:16539177-16539735;Scaffold1:16540556-16541262;Scaffold1:16542001-16542507;Scaffold1:16543501-16543867;Scaffold1:16545001-16545088	16539177;16540556;16542001;16543501;16545001	16539735;16541262;16542507;16543867;16545088	CP001391.1;737673;738006;2.399E-50;208;334;74.300;Wolbachia sp. wRi;CP001391.1;740001;740532;1.477E-141;511;532;81.300;Wolbachia sp. wRi;CP001391.1;740030;740537;4.131E-115;423;508;78.500;Wolbachia sp. wRi;CP001391.1;740702;741069;3.855E-78;301;368;78.300;Wolbachia sp. wRi;CP001391.1;741350;741441;3.451E-14;88;92;81.500;Wolbachia sp. wRi	611;655;424;302;89	0.301075268817204;0.355524079320113;0.355731225296443;0.35792349726776;0.28735632183908	17;15;NA	16;15;NA	5
GAGA-0024.Scaffold5.2067663-2147561	GAGA-0024	Lasius flavus s1	Formicinae	Chromosome level	NA	NA	NA	NA	Scaffold5	2067663	2147561	Scaffold5:2087663-2088344;Scaffold5:2089502-2089697;Scaffold5:2124138-2124496;Scaffold5:2125620-2125961;Scaffold5:2126880-2127561	2087663;2089502;2124138;2125620;2126880	2088344;2089697;2124496;2125961;2127561	CP001391.1;740774;741033;3.586E-58;234;260;80.000;Wolbachia sp. wRi;CP001391.1;741233;741441;5.559E-42;181;209;79.400;Wolbachia sp. wRi;CP001391.1;741064;741436;1.111E-95;359;373;81.700;Wolbachia sp. wRi;CP001391.1;740691;741033;1.547E-66;262;343;76.900;Wolbachia sp. wRi;CP001391.1;740490;741033;1.547E-66;262;556;70.400;Wolbachia sp. wRi	458;182;203;263;485	0.365638766519824;0.338461538461538;0.343575418994413;0.360703812316716;0.367107195301028	26;30;38;36;34	29;39;34;37	5
GAGA-0024.Scaffold5.2203940-2247970	GAGA-0024	Lasius flavus s1	Formicinae	Chromosome level	ankyrin_repeat_protein	Wolbachia	Rickettsiales	Alphaproteobacteria	Scaffold5	2203940	2247970	Scaffold5:2223940-2224925;Scaffold5:2226001-2226394;Scaffold5:2227524-2227970	2223940;2226001;2227524	2224925;2226394;2227970	CP001391.1;737673;738497;2.137E-122;448;825;72.500;Wolbachia sp. wRi;CP001391.1;740647;741032;8.615E-77;296;395;76.700;Wolbachia sp. wRi;CP001391.1;740691;741135;4.628E-77;297;448;75.400;Wolbachia sp. wRi	769;297;110	0.315736040609137;0.351145038167939;0.356502242152466	24;25;29	26;24;34	3
GAGA-0024.Scaffold5.3203505-3245315	GAGA-0024	Lasius flavus s1	Formicinae	Chromosome level	ankyrin_repeat_protein	Wolbachia	Rickettsiales	Alphaproteobacteria	Scaffold5	3203505	3245315	Scaffold5:3223505-3224460;Scaffold5:3225001-3225315	3223505;3225001	3224460;3225315	CP001391.1;737684;738183;2.392E-101;378;500;76.900;Wolbachia sp. wRi;CP001391.1;740718;741033;3.718E-68;268;316;78.700;Wolbachia sp. wRi	370;269	0.321465968586387;0.359872611464968	46;48	47	2
GAGA-0024.Scaffold395.0-25763	GAGA-0024	Lasius flavus s1	Formicinae	Chromosome level	NA	NA	NA	NA	Scaffold395	0	25763	Scaffold395:4521-4894;Scaffold395:5695-6052;Scaffold395:9073-9631	4521;5695;9073	4894;6052;9631	CP001391.1;741007;741382;4.971E-97;363;376;83.800;Wolbachia sp. wRi;CP001391.1;740688;741050;7.445E-37;164;363;71.500;Wolbachia sp. wRi;CP001391.1;737824;738241;1.113E-78;302;418;76.600;Wolbachia sp. wRi	364;165	0.310991957104558;0.338935574229692;0.297491039426523	3;NA	3;NA	3
GAGA-0024.Scaffold6.5076289-5119310	GAGA-0024	Lasius flavus s1	Formicinae	Chromosome level	NA	NA	NA	NA	Scaffold6	5076289	5119310	Scaffold6:5096289-5096638;Scaffold6:5097737-5098250;Scaffold6:5098823-5099310	5096289;5097737;5098823	5096638;5098250;5099310	CP001391.1;737673;738023;6.435E-48;200;351;72.200;Wolbachia sp. wRi;CP001391.1;740023;740537;1.235E-125;458;515;79.800;Wolbachia sp. wRi;CP001391.1;740947;741441;3.417E-150;540;495;84.400;Wolbachia sp. wRi	201;61;282	0.306590257879656;0.348927875243665;0.340862422997947	20;NA;43	22;NA;44	3
GAGA-0024.Scaffold6.5132929-5208535	GAGA-0024	Lasius flavus s1	Formicinae	Chromosome level	NA	NA	NA	NA	Scaffold6	5132929	5208535	Scaffold6:5152929-5153725;Scaffold6:5154062-5154615;Scaffold6:5155511-5155960;Scaffold6:5185569-5185910;Scaffold6:5187102-5187443;Scaffold6:5187780-5188535	5152929;5154062;5155511;5185569;5187102;5187780	5153725;5154615;5155960;5185910;5187443;5188535	CP001391.1;737673;738500;4.741E-155;556;828;75.000;Wolbachia sp. wRi;CP001391.1;740490;741033;6.429E-82;313;555;72.500;Wolbachia sp. wRi;CP001391.1;740979;741441;2.750E-141;510;463;84.400;Wolbachia sp. wRi;CP001391.1;740691;741033;2.398E-67;265;343;77.300;Wolbachia sp. wRi;CP001391.1;740691;741033;1.242E-74;289;343;78.700;Wolbachia sp. wRi;CP001391.1;737714;738500;3.673E-153;550;787;75.600;Wolbac…	253;314;318;266;290;244	0.316582914572864;0.361663652802893;0.320712694877506;0.354838709677419;0.316556291390728	NA;30;45	NA;36;41	6
GAGA-0024.Scaffold6.5236001-5279552	GAGA-0024	Lasius flavus s1	Formicinae	Chromosome level	ankyrin_repeat_protein	Wolbachia	Rickettsiales	Alphaproteobacteria	Scaffold6	5236001	5279552	Scaffold6:5256001-5256297;Scaffold6:5259080-5259552	5256001;5259080	5256297;5259552	CP001391.1;737944;738241;3.586E-58;234;298;77.900;Wolbachia sp. wRi;CP001391.1;740964;741441;7.104E-146;526;478;84.700;Wolbachia sp. wRi	235;291	0.287162162162162;0.326271186440678	26	27;23	2
GAGA-0024.Scaffold6.5377922-5420444	GAGA-0024	Lasius flavus s1	Formicinae	Chromosome level	ankyrin_repeat_protein	Wolbachia	Rickettsiales	Alphaproteobacteria	Scaffold6	5377922	5420444	Scaffold6:5397922-5398727;Scaffold6:5400008-5400444	5397922;5400008	5398727;5400444	CP001391.1;737714;738517;8.170E-169;602;807;76.300;Wolbachia sp. wRi;CP001391.1;741001;741441;2.845E-151;543;441;87.500;Wolbachia sp. wRi	325;310	0.316770186335404;0.31651376146789	41;50	47	2
GAGA-0024.Scaffold7.6719609-6760694	GAGA-0024	Lasius flavus s1	Formicinae	Chromosome level	ankyrin_repeat_protein	Wolbachia	Rickettsiales	Alphaproteobacteria	Scaffold7	6719609	6760694	Scaffold7:6739609-6739940;Scaffold7:6740239-6740694	6739609;6740239	6739940;6740694	CP001391.1;740691;741023;1.726E-62;249;333;76.500;Wolbachia sp. wRi;CP001391.1;740576;741023;1.113E-78;302;457;74.900;Wolbachia sp. wRi	250;303	0.377643504531722;0.358241758241758	NA	NA	2
GAGA-0025.Scaffold15.4158206-4198515	GAGA-0025	Megaponera analis	Ponerinae	PacBio	NA	Spiroplasma_kunkelii	Entoplasmatales	Mollicutes	Scaffold15	4158206	4198515	Scaffold15:4178206-4178515	4178206	4178515	CP012423.1;8906;9222;2.987E-59;238;317;77.300;Spiroplasma kunkelii CR2-3x	239	0.223300971	NA	NA	1
GAGA-0025.Scaffold15.4160270-4201120	GAGA-0025	Megaponera analis	Ponerinae	PacBio	NA	Spiroplasma_kunkelii	Entoplasmatales	Mollicutes	Scaffold15	4160270	4201120	Scaffold15:4180270-4180693;Scaffold15:4180925-4181120	4180270;4180925	4180693;4181120	CP012423.1;14013;14442;3.586E-58;234;430;72.300;Spiroplasma kunkelii CR2-3x;CP012423.1;19317;19517;8.298E-16;94;201;72.500;Spiroplasma kunkelii CR2-3x	235;95	0.231678486997636;0.21025641025641	39;NA	46;NA	2
GAGA-0026.Scaffold2.5825695-5865924	GAGA-0026	Myrmecocystus cf. mendax	Formicinae	Chromosome level	NA	NA	NA	NA	Scaffold2	5825695	5865924	Scaffold2:5845695-5845924	5845695	5845924	CP003884.1;838428;838648;1.154E-37;166;230;76.200;Wolbachia endosymbiont of Drosophila simulans wHa	668	0.248908297	27	28	1
GAGA-0026.Scaffold2.0-44173	GAGA-0026	Myrmecocystus cf. mendax	Formicinae	Chromosome level	NA	NA	NA	NA	Scaffold2	0	44173	Scaffold2:13277-13551;Scaffold2:13664-14425;Scaffold2:16534-17370;Scaffold2:20549-20638;Scaffold2:23997-24173;Scaffold2:2803-4003;Scaffold2:5499-6418;Scaffold2:8145-8228	13277;13664;16534;20549;23997;2803;5499;8145	13551;14425;17370;20638;24173;4003;6418;8228	CP002955.1;1377440;1377714;4.300E-23;118;276;70.400;Cyclobacterium marinum DSM 745;CP001619.1;5697149;5697928;5.764E-35;157;780;66.400;Dyadobacter fermentans DSM 18053;CP001619.1;5700062;5700905;2.981E-93;351;844;70.100;Dyadobacter fermentans DSM 18053;BA000019.2;4019807;4019898;2.482E-09;72;92;79.500;Nostoc sp. PCC 7120 = FACHB-418;CP001619.1;792297;792475;4.973E-12;81;179;70.300;Dyadobacter fer…	194;158;600;73;82;2437;930;79	0.441605839416058;0.387647831800263;0.381578947368421;0.426966292134831;0.431818181818182;0.36;0.372143634385201;0.44578313253012	NA;2;4	NA;3;4	8
GAGA-0026.Scaffold15.2293900-2386496	GAGA-0026	Myrmecocystus cf. mendax	Formicinae	Chromosome level	NA	NA	NA	NA	Scaffold15	2293900	2386496	Scaffold15:2313900-2317869;Scaffold15:2317970-2319444;Scaffold15:2320026-2321519;Scaffold15:2322785-2323109;Scaffold15:2325343-2338755;Scaffold15:2339025-2346253;Scaffold15:2347494-2347882;Scaffold15:2348453-2349630;Scaffold15:2349753-2350511;Scaffold15:2351490-2351687;Scaffold15:2351920-2354328;Scaffold15:2354443-2354689;Scaffold15:2354818-2358424;Scaffold15:2360384-2362170;Scaffold15:2362463-23…	2313900;2317970;2320026;2322785;2325343;2339025;2347494;2348453;2349753;2351490;2351920;2354443;2354818;2360384;2362463;2363878;2366195	2317869;2319444;2321519;2323109;2338755;2346253;2347882;2349630;2350511;2351687;2354328;2354689;2358424;2362170;2362721;2365517;2366496	CP001966.1;1876035;1877102;8.421E-257;894;1102;78.700;Tsukamurella paurometabola DSM 20162;CP001966.1;1870634;1872078;1.521E-246;860;1476;74.200;Tsukamurella paurometabola DSM 20162;CP010946.1;2952847;2953809;1.068E-119;439;971;71.400;Mycobacteroides chelonae;CP011340.1;7546475;7546800;4.148E-30;141;326;71.600;Streptomyces pristinaespiralis;CP001966.1;2597316;2598975;0.000E+00;1652;1660;83.500;Ts…	176378;84330;29085;525;634451;450480;760;88916;7983;278;62047;79;59066;13609;391;11770;1181	0.714033761652809;0.657394843962008;0.636302746148694;0.669753086419753;0.700119296152699;0.710431654676259;0.688144329896907;0.659303313508921;0.70844327176781;0.720812182741117;0.70390365448505;0.66260162601626;0.676927343316694;0.70548712206047;0.748062015503876;0.708358755338621;0.724252491694352	NA;6;2;3	NA;3;2;4	17
GAGA-0026.Scaffold25.464716-508188	GAGA-0026	Myrmecocystus cf. mendax	Formicinae	Chromosome level	NA	NA	NA	NA	Scaffold25	464716	508188	Scaffold25:484716-485225;Scaffold25:485372-485727;Scaffold25:486002-486357;Scaffold25:487698-488188	484716;485372;486002;487698	485225;485727;486357;488188	CP001391.1;737673;737957;2.149E-37;165;285;73.000;Wolbachia sp. wRi;CP001391.1;740691;741045;3.097E-69;271;357;77.000;Wolbachia sp. wRi;CP001391.1;740947;741441;3.534E-160;573;495;85.800;Wolbachia sp. wRi	226;272;324	0.275049115913556;0.352112676056338;0.338028169014085;0.318367346938775	NA;63	NA;60	4
GAGA-0028.Scaffold272.0-109663	GAGA-0028	Myrmica rubra	Myrmicinae	PacBio	NA	NA	NA	NA	Scaffold272	0	109663	Scaffold272:1-609;Scaffold272:10777-10906;Scaffold272:11052-15501;Scaffold272:15636-19142;Scaffold272:19361-25130;Scaffold272:25497-26389;Scaffold272:26500-26957;Scaffold272:27320-29388;Scaffold272:3001-4890;Scaffold272:30548-33447;Scaffold272:33765-34822;Scaffold272:35721-37313;Scaffold272:38170-41090;Scaffold272:41432-43496;Scaffold272:44905-46104;Scaffold272:46282-50271;Scaffold272:50712-51181…	1;10777;11052;15636;19361;25497;26500;27320;3001;30548;33765;35721;38170;41432;44905;46282;50712;51285;51769;6152;64513;6903;72745;74309;76752;8113;81190;82014;850;87690;88170;8968;9596;9836	609;10906;15501;19142;25130;26389;26957;29388;4890;33447;34822;37313;41090;43496;46104;50271;51181;51618;63499;6797;72483;7835;73692;75203;81078;8684;81625;86391;2704;88062;89663;9334;9716;10443	CP010899.1;897275;897889;1.209E-193;684;615;85.900;Spiroplasma kunkelii CR2-3x;CP010899.1;133481;133611;7.180E-44;187;131;91.600;Spiroplasma kunkelii CR2-3x;CP002082.1;502799;504250;0.000E+00;1934;1452;89.800;Spiroplasma mirum ATCC 29335;CP010899.1;303318;303468;2.228E-30;142;151;80.700;Spiroplasma kunkelii CR2-3x;CP010899.1;302723;303044;2.580E-36;162;333;72.600;Spiroplasma kunkelii CR2-3x;CP010…	2546;188;36811;9395;42518;9385;3010;30925;5621;39534;5861;504;33937;24856;22765;39880;988;352;135289;922;36930;1493;4059;2015;17279;570;3129;40202;11530;2694;4925;211;71;2409	0.217105263157895;0.27906976744186;0.22207237581479;0.237307472903594;0.28479805858901;0.20627802690583;0.225382932166302;0.230174081237911;0.243515087347803;0.218696102104174;0.215704824976348;0.204773869346734;0.231506849315068;0.233527131782946;0.219349457881568;0.253697668588619;0.243070362473348;0.312312312312312;0.271270247229327;0.215503875968992;0.244165621079046;0.260729613733906;0.21013…	NA;10	NA;11;10	34
GAGA-0028.Scaffold119.38501-78755	GAGA-0028	Myrmica rubra	Myrmicinae	PacBio	ankyrin_repeat_protein	Wolbachia	Rickettsiales	Alphaproteobacteria	Scaffold119	38501	78755	Scaffold119:58501-58755	58501	58755	CP001391.1;741119;741380;1.489E-90;342;262;88.900;Wolbachia sp. wRi	232	0.342519685	22	22	1
GAGA-0028.Scaffold144.119355-159735	GAGA-0028	Myrmica rubra	Myrmicinae	PacBio	NA	NA	NA	NA	Scaffold144	119355	159735	Scaffold144:139355-139735	139355	139735	CP001391.1;734693;735073;9.267E-29;137;382;68.600;Wolbachia sp. wRi	364	0.3	34	33	1
GAGA-0028.Scaffold148.439332-479780	GAGA-0028	Myrmica rubra	Myrmicinae	PacBio	NA	NA	NA	NA	Scaffold148	439332	479780	Scaffold148:459332-459780	459332	459780	HE660029.1;749851;750000;6.202E-38;167;150;84.600;Wolbachia endosymbiont of Onchocerca ochengi	5261	0.379464286	21	22	1
GAGA-0028.Scaffold21.3339731-3380234	GAGA-0028	Myrmica rubra	Myrmicinae	PacBio	ankyrin_repeat_protein	Wolbachia	Rickettsiales	Alphaproteobacteria	Scaffold21	3339731	3380234	Scaffold21:3359731-3360234	3359731	3360234	CP001391.1;737674;738171;1.238E-108;402;505;77.400;Wolbachia sp. wRi	403	0.284294235	36	33	1
GAGA-0028.Scaffold22.1277266-1318876	GAGA-0028	Myrmica rubra	Myrmicinae	PacBio	ankyrin_repeat_protein	Wolbachia	Rickettsiales	Alphaproteobacteria	Scaffold22	1277266	1318876	Scaffold22:1297266-1298876	1297266	1298876	CP001391.1;741770;742412;1.407E-182;647;643;82.500;Wolbachia sp. wRi	11742	0.31863354	28	27	1
GAGA-0028.Scaffold245.77502-117693	GAGA-0028	Myrmica rubra	Myrmicinae	PacBio	NA	Wolbachia	Rickettsiales	Alphaproteobacteria	Scaffold245	77502	117693	Scaffold245:97502-97693	97502	97693	CP003884.1;104847;105044;5.981E-45;191;198;81.300;Wolbachia endosymbiont of Drosophila simulans wHa	754	0.329842932	22	22	1
GAGA-0028.Scaffold26.1590767-1631574	GAGA-0028	Myrmica rubra	Myrmicinae	PacBio	ankyrin_repeat_protein	Wolbachia	Rickettsiales	Alphaproteobacteria	Scaffold26	1590767	1631574	Scaffold26:1610767-1611574	1610767	1611574	CP001391.1;737674;738436;2.437E-179;637;763;78.200;Wolbachia sp. wRi	568	0.296158612	17	17	1
GAGA-0028.Scaffold296.99350-139996	GAGA-0028	Myrmica rubra	Myrmicinae	PacBio	NA	NA	NA	NA	Scaffold296	99350	139996	Scaffold296:119350-119996	119350	119996	CP001391.1;740731;741380;7.267E-190;672;650;83.000;Wolbachia sp. wRi	251	0.365325077	6	6	1
GAGA-0028.Scaffold39.2020277-2061929	GAGA-0028	Myrmica rubra	Myrmicinae	PacBio	NA	NA	NA	NA	Scaffold39	2020277	2061929	Scaffold39:2040277-2041929	2040277	2041929	CP003884.1;419006;419405;4.119E-132;480;400;86.700;Wolbachia endosymbiont of Drosophila simulans wHa	7583	0.345641646	NA	NA	1
GAGA-0028.Scaffold467.0-25466	GAGA-0028	Myrmica rubra	Myrmicinae	PacBio	NA	NA	NA	NA	Scaffold467	0	25466	Scaffold467:4857-5466	4857	5466	CP001391.1;741044;741169;1.725E-28;136;127;84.200;Wolbachia sp. wRi	289	0.366174056	10	11	1
GAGA-0028.Scaffold544.53978-94404	GAGA-0028	Myrmica rubra	Myrmicinae	PacBio	NA	NA	NA	NA	Scaffold544	53978	94404	Scaffold544:73978-74404	73978	74404	CP001391.1;740953;741380;1.528E-151;544;428;88.300;Wolbachia sp. wRi	250	0.345070423	10	10	1
GAGA-0028.Scaffold546.0-38491	GAGA-0028	Myrmica rubra	Myrmicinae	PacBio	NA	NA	NA	NA	Scaffold546	0	38491	Scaffold546:17406-18491	17406	18491	CP001391.1;737727;738495;5.736E-120;440;769;72.600;Wolbachia sp. wRi	503	0.312442396	11	10	1
GAGA-0028.Scaffold58.1104720-1145365	GAGA-0028	Myrmica rubra	Myrmicinae	PacBio	NA	NA	NA	NA	Scaffold58	1104720	1145365	Scaffold58:1124720-1125365	1124720	1125365	CP001391.1;740731;741380;4.194E-193;682;650;83.300;Wolbachia sp. wRi	399	0.36744186	11	12	1
GAGA-0028.Scaffold721.0-32007	GAGA-0028	Myrmica rubra	Myrmicinae	PacBio	NA	NA	NA	NA	Scaffold721	0	32007	Scaffold721:10501-12007;Scaffold721:7189-7772;Scaffold721:7903-8282	10501;7189;7903	12007;7772;8282	AM999887.1;304817;306289;2.558E-233;816;1508;72.800;Wolbachia endosymbiont of Culex quinquefasciatus Pel;CP003883.1;115055;115580;5.539E-110;406;533;77.500;Wolbachia endosymbiont of Drosophila simulans wNo;AM999887.1;302087;302464;5.969E-96;360;381;81.100;Wolbachia endosymbiont of Culex quinquefasciatus Pel	504;2293;263	0.292164674634794;0.332761578044597;0.329815303430079	13;NA	14;NA	3
GAGA-0028.Scaffold707.0-23500	GAGA-0028	Myrmica rubra	Myrmicinae	PacBio	NA	NA	NA	NA	Scaffold707	0	23500	Scaffold707:2869-3500	2869	3500	CP001391.1;740745;741380;3.024E-188;666;636;83.200;Wolbachia sp. wRi	383	0.366085578	5	6	1
GAGA-0028.Scaffold878.6578-31518	GAGA-0028	Myrmica rubra	Myrmicinae	PacBio	NA	NA	NA	NA	Scaffold878	6578	31518	Scaffold878:26578-27223	26578	27223	CP001391.1;740731;741380;1.876E-194;687;650;83.400;Wolbachia sp. wRi	409	0.36744186	7	4	1
GAGA-0028.Scaffold148.351628-391851	GAGA-0028	Myrmica rubra	Myrmicinae	PacBio	periplasmic_serine_endoprotease_DegP-like	Wolbachia	Rickettsiales	Alphaproteobacteria	Scaffold148	351628	391851	Scaffold148:371628-371851	371628	371851	AE017321.1;1012415;1012628;4.464E-67;264;214;87.300;Wolbachia endosymbiont strain TRS of Brugia malayi	1373	0.331838565	NA	NA	1
GAGA-0028.Scaffold182.1385-41846	GAGA-0028	Myrmica rubra	Myrmicinae	PacBio	NA	NA	NA	NA	Scaffold182	1385	41846	Scaffold182:21385-21846	21385	21846	CP010899.1;897399;897878;2.486E-77;298;480;76.300;Spiroplasma kunkelii CR2-3x	1152	0.221258134	NA	NA	1
GAGA-0028.Scaffold448.86346-165517	GAGA-0028	Myrmica rubra	Myrmicinae	PacBio	NA	NA	NA	NA	Scaffold448	86346	165517	Scaffold448:106346-110044;Scaffold448:141622-145517	106346;141622	110044;145517	CP003884.1;419006;419405;4.141E-98;367;400;83.000;Wolbachia endosymbiont of Drosophila simulans wHa;AP013028.1;823107;824009;4.654E-206;725;940;77.100;Wolbachia endosymbiont of Cimex lectularius	9521;18873	0.349648458626284;0.343260590500642	NA	NA	2
GAGA-0028.Scaffold58.1052896-1094621	GAGA-0028	Myrmica rubra	Myrmicinae	PacBio	ankyrin_repeat_protein	Wolbachia	Rickettsiales	Alphaproteobacteria	Scaffold58	1052896	1094621	Scaffold58:1072896-1073458;Scaffold58:1074130-1074621	1072896;1074130	1073458;1074621	CP001391.1;740775;741380;2.772E-90;341;606;72.600;Wolbachia sp. wRi;CP001391.1;737808;738171;9.254E-97;363;364;82.100;Wolbachia sp. wRi	342;136	0.364768683274021;0.285132382892057	46;NA	51;NA	2
GAGA-0028.Scaffold54.1079744-1123406	GAGA-0028	Myrmica rubra	Myrmicinae	PacBio	ankyrin_repeat_protein	Wolbachia	Rickettsiales	Alphaproteobacteria	Scaffold54	1079744	1123406	Scaffold54:1099744-1100757;Scaffold54:1101179-1102261;Scaffold54:1102502-1103406	1099744;1101179;1102502	1100757;1102261;1103406	CP001391.1;737674;737937;5.359E-66;260;264;81.800;Wolbachia sp. wRi;CP001391.1;740001;741075;4.257E-237;828;1084;77.200;Wolbachia sp. wRi;CP001391.1;740484;741380;7.154E-224;784;906;79.500;Wolbachia sp. wRi	252;129;432	0.309970384995064;0.355822550831793;0.361725663716814	NA	NA	3
GAGA-0028.Scaffold84.1105903-1148713	GAGA-0028	Myrmica rubra	Myrmicinae	PacBio	ankyrin_repeat_protein	Wolbachia	Rickettsiales	Alphaproteobacteria	Scaffold84	1105903	1148713	Scaffold84:1125903-1126997;Scaffold84:1128001-1128713	1125903;1128001	1126997;1128713	CP001391.1;740279;741380;1.104E-285;990;1102;80.000;Wolbachia sp. wRi;CP001391.1;737674;738366;4.927E-148;533;714;76.300;Wolbachia sp. wRi	688;162	0.368372943327239;0.297752808988764	21;26	25	2
GAGA-0028.Scaffold349.102730-145124	GAGA-0028	Myrmica rubra	Myrmicinae	PacBio	ankyrin_repeat_protein	Wolbachia	Rickettsiales	Alphaproteobacteria	Scaffold349	102730	145124	Scaffold349:122730-123647;Scaffold349:124501-124634;Scaffold349:124838-125124	122730;124501;124838	123647;124634;125124	CP001391.1;737737;738511;7.808E-193;681;775;79.200;Wolbachia sp. wRi;CP001391.1;739788;739928;2.398E-33;152;141;83.600;Wolbachia sp. wRi;CP001391.1;740731;741018;4.305E-57;231;288;77.700;Wolbachia sp. wRi	442;153;95	0.318429661941112;0.278195488721804;0.374125874125874	13;15;NA	15;NA	3
GAGA-0028.Scaffold144.116597-158856	GAGA-0028	Myrmica rubra	Myrmicinae	PacBio	NA	NA	NA	NA	Scaffold144	116597	158856	Scaffold144:136597-136679;Scaffold144:137511-138856	136597;137511	136679;138856	AP013028.1;1076487;1076570;9.256E-12;80;84;80.900;Wolbachia endosymbiont of Cimex lectularius;CP003883.1;1192023;1192974;2.050E-146;527;963;72.800;Wolbachia endosymbiont of Drosophila simulans wNo	162;1608	0.402439024390244;0.304832713754647	NA	NA	2
GAGA-0028.Scaffold17.117169-159671	GAGA-0028	Myrmica rubra	Myrmicinae	PacBio	ankyrin_repeat_protein	Wolbachia	Rickettsiales	Alphaproteobacteria	Scaffold17	117169	159671	Scaffold17:137169-138084;Scaffold17:139501-139671	137169;139501	138084;139671	CP001391.1;737727;738658;3.632E-187;663;932;75.500;Wolbachia sp. wRi;CP001391.1;741203;741380;6.435E-48;200;178;84.800;Wolbachia sp. wRi	186;201	0.320218579234973;0.370588235294118	16;19	18;21	2
GAGA-0028.Scaffold42.1455721-1498092	GAGA-0028	Myrmica rubra	Myrmicinae	PacBio	ankyrin_repeat_protein	Wolbachia	Rickettsiales	Alphaproteobacteria	Scaffold42	1455721	1498092	Scaffold42:1475721-1476483;Scaffold42:1477513-1478092	1475721;1477513	1476483;1478092	CP001391.1;740001;740761;1.144E-139;505;764;74.500;Wolbachia sp. wRi;CP001391.1;740797;741380;1.625E-188;667;584;85.300;Wolbachia sp. wRi	75;366	0.362204724409449;0.357512953367876	NA;24	NA;25	2
GAGA-0028.Scaffold763.0-38233	GAGA-0028	Myrmica rubra	Myrmicinae	PacBio	NA	NA	NA	NA	Scaffold763	0	38233	Scaffold763:15636-16077;Scaffold763:18001-18233	15636;18001	16077;18233	CP001391.1;737727;738170;3.200E-113;417;444;81.000;Wolbachia sp. wRi;CP001391.1;741047;741280;5.160E-90;340;234;92.300;Wolbachia sp. wRi	183;184	0.283446712018141;0.344827586206897	9	10;9	2
GAGA-0028.Scaffold42.138207-194421	GAGA-0028	Myrmica rubra	Myrmicinae	PacBio	NA	NA	NA	NA	Scaffold42	138207	194421	Scaffold42:158207-158475;Scaffold42:159221-159500;Scaffold42:160371-160881;Scaffold42:174135-174421	158207;159221;160371;174135	158475;159500;160881;174421	CP001391.1;739635;739928;7.180E-44;187;294;73.400;Wolbachia sp. wRi;CP001391.1;740070;740350;8.310E-67;263;281;80.700;Wolbachia sp. wRi;CP001391.1;737674;738191;1.427E-131;478;518;80.500;Wolbachia sp. wRi;CP001391.1;740731;741018;3.857E-61;244;288;78.800;Wolbachia sp. wRi	59;82;536;73	0.332089552238806;0.326164874551971;0.274509803921569;0.377622377622378	NA;39	NA;42	4
GAGA-0028.Scaffold625.0-36496	GAGA-0028	Myrmica rubra	Myrmicinae	PacBio	NA	NA	NA	NA	Scaffold625	0	36496	Scaffold625:1614-2035;Scaffold625:3734-4936;Scaffold625:5610-5701;Scaffold625:5841-7510;Scaffold625:7897-14166;Scaffold625:87-715	1614;3734;5610;5841;7897;87	2035;4936;5701;7510;14166;715	CP010899.1;1295818;1296203;8.615E-60;240;386;74.200;Spiroplasma kunkelii CR2-3x;CP010899.1;1430001;1430575;1.846E-228;800;577;91.100;Spiroplasma kunkelii CR2-3x;CP010899.1;1229425;1229515;1.723E-11;79;93;79.700;Spiroplasma kunkelii CR2-3x;CP010899.1;740046;740704;7.684E-227;794;659;87.100;Spiroplasma kunkelii CR2-3x;CP010899.1;500615;502222;0.000E+00;1997;1608;87.700;Spiroplasma kunkelii CR2-3x;C…	503;3462;80;9827;71418;5470	0.232779097387173;0.205490848585691;0.208791208791209;0.20611144397843;0.280587015472962;0.211783439490446	5;4;NA	5;NA;4	6
GAGA-0028.Scaffold26.1640761-1697598	GAGA-0028	Myrmica rubra	Myrmicinae	PacBio	Phosphocholine_transferase	Wolbachia	Rickettsiales	Alphaproteobacteria	Scaffold26	1640761	1697598	Scaffold26:1660761-1661271;Scaffold26:1663509-1663938;Scaffold26:1672022-1672427;Scaffold26:1672688-1673198;Scaffold26:1674003-1674351;Scaffold26:1675992-1676816;Scaffold26:1677001-1677598	1660761;1663509;1672022;1672688;1674003;1675992;1677001	1661271;1663938;1672427;1673198;1674351;1676816;1677598	CP001391.1;737674;737920;1.605E-59;239;247;81.300;Wolbachia sp. wRi;CP001391.1;740951;741380;5.503E-144;519;431;87.000;Wolbachia sp. wRi;CP001391.1;737733;738140;6.184E-106;393;408;81.600;Wolbachia sp. wRi;CP001391.1;737674;738191;3.190E-130;474;518;80.300;Wolbachia sp. wRi;CP001391.1;740001;740350;8.302E-84;320;350;80.200;Wolbachia sp. wRi;CP001391.1;740195;741018;1.178E-166;595;826;75.900;Wolba…	245;249;153;475;77;320;423	0.27843137254902;0.34965034965035;0.271604938271605;0.276470588235294;0.339080459770115;0.356796116504854;0.358458961474037	28;35;NA	27;37;NA	7
GAGA-0028.Scaffold182.0-41000	GAGA-0028	Myrmica rubra	Myrmicinae	PacBio	NA	NA	NA	NA	Scaffold182	0	41000	Scaffold182:16802-17088;Scaffold182:17913-18349;Scaffold182:19487-21000	16802;17913;19487	17088;18349;21000	CP010899.1;476501;476564;7.165E-10;74;65;86.100;Spiroplasma kunkelii CR2-3x;CP010899.1;1087229;1087670;1.853E-99;371;442;81.400;Spiroplasma kunkelii CR2-3x;CP010899.1;1145369;1145869;3.089E-103;384;511;78.300;Spiroplasma kunkelii CR2-3x	2968;670;4211	0.230769230769231;0.201834862385321;0.215465961665565	NA	NA	3
GAGA-0028.Scaffold17.1725282-1769632	GAGA-0028	Myrmica rubra	Myrmicinae	PacBio	ankyrin_repeat_protein	Wolbachia	Rickettsiales	Alphaproteobacteria	Scaffold17	1725282	1769632	Scaffold17:1745282-1746173;Scaffold17:1749001-1749632	1745282;1749001	1746173;1749632	CP001391.1;737727;738619;1.973E-153;551;893;73.700;Wolbachia sp. wRi;CP001391.1;740745;741380;1.353E-189;671;636;83.400;Wolbachia sp. wRi	243;397	0.301907968574635;0.356576862123613	16;19	17;19	2
GAGA-0028.Scaffold26.1770809-1813595	GAGA-0028	Myrmica rubra	Myrmicinae	PacBio	ankyrin_repeat_protein	Wolbachia	Rickettsiales	Alphaproteobacteria	Scaffold26	1770809	1813595	Scaffold26:1790809-1791480;Scaffold26:1791727-1793595	1790809;1791727	1791480;1793595	CP001391.1;740690;741380;6.006E-208;732;691;83.600;Wolbachia sp. wRi;CP001391.1;740007;740846;3.928E-173;616;840;76.300;Wolbachia sp. wRi	426;346	0.350223546944858;0.329229122055675	NA	NA	2
GAGA-0028.Scaffold17.1817826-1862490	GAGA-0028	Myrmica rubra	Myrmicinae	PacBio	ankyrin_repeat_protein	Wolbachia	Rickettsiales	Alphaproteobacteria	Scaffold17	1817826	1862490	Scaffold17:1837826-1838000;Scaffold17:1840331-1840665;Scaffold17:1841605-1842490	1837826;1840331;1841605	1838000;1840665;1842490	CP001391.1;741199;741380;3.586E-58;234;182;88.400;Wolbachia sp. wRi;CP001391.1;738323;738658;1.336E-77;299;336;79.700;Wolbachia sp. wRi;CP001391.1;737727;738608;8.210E-152;545;887;74.000;Wolbachia sp. wRi	235;300;617	0.350574712643678;0.341317365269461;0.322033898305085	49;45;46	49;45;47	3
GAGA-0028.Scaffold21.0-51288	GAGA-0028	Myrmica rubra	Myrmicinae	PacBio	NA	NA	NA	NA	Scaffold21	0	51288	Scaffold21:21206-21499;Scaffold21:23344-24194;Scaffold21:28200-29383;Scaffold21:30664-31288;Scaffold21:4240-5263;Scaffold21:7479-7763;Scaffold21:8180-8690	21206;23344;28200;30664;4240;7479;8180	21499;24194;29383;31288;5263;7763;8690	CP001391.1;741086;741380;1.539E-117;431;295;92.500;Wolbachia sp. wRi;CP001391.1;737733;738608;3.145E-181;643;876;76.000;Wolbachia sp. wRi;CP001391.1;740731;741395;1.163E-200;707;671;83.600;Wolbachia sp. wRi;CP001391.1;737865;738510;2.738E-158;567;646;79.100;Wolbachia sp. wRi;CP001391.1;740619;741380;9.686E-202;711;762;80.600;Wolbachia sp. wRi;CP001391.1;738213;738498;3.213E-62;248;286;79.500;Wolb…	240;644;466;311;849;249;82	0.348122866894198;0.309411764705882;0.351648351648352;0.301282051282051;0.356793743890518;0.345070422535211;0.27843137254902	19;32;NA;0;26;27	21;35;NA;0;27;26	7
GAGA-0028.Scaffold18.2123551-2166148	GAGA-0028	Myrmica rubra	Myrmicinae	PacBio	ankyrin_repeat_protein	Wolbachia	Rickettsiales	Alphaproteobacteria	Scaffold18	2123551	2166148	Scaffold18:2143551-2144041;Scaffold18:2144752-2146148	2143551;2144752	2144041;2146148	CP001391.1;737674;738130;6.887E-119;436;457;81.100;Wolbachia sp. wRi;CP001391.1;740007;740735;6.632E-126;459;750;73.700;Wolbachia sp. wRi	123;763	0.275510204081633;0.351719197707736	NA	NA	2
GAGA-0028.Scaffold21.2402690-2451832	GAGA-0028	Myrmica rubra	Myrmicinae	PacBio	NA	NA	NA	NA	Scaffold21	2402690	2451832	Scaffold21:2422690-2423503;Scaffold21:2428576-2429454;Scaffold21:2431501-2431832	2422690;2428576;2431501	2423503;2429454;2431832	CP001391.1;737679;738508;2.268E-176;627;830;76.100;Wolbachia sp. wRi;CP001391.1;737714;738609;1.463E-175;624;896;75.500;Wolbachia sp. wRi;CP001391.1;741048;741380;2.967E-127;464;333;90.900;Wolbachia sp. wRi	679;334;255	0.314883148831488;0.313211845102506;0.350453172205438	11;18;19	12;19	3
GAGA-0028.Scaffold32.246132-288636	GAGA-0028	Myrmica rubra	Myrmicinae	PacBio	ankyrin_repeat_protein	Wolbachia	Rickettsiales	Alphaproteobacteria	Scaffold32	246132	288636	Scaffold32:266132-266631;Scaffold32:268501-268636	266132;268501	266631;268636	CP001391.1;737674;738183;1.028E-126;462;510;80.100;Wolbachia sp. wRi;CP001391.1;741244;741380;4.631E-43;184;137;89.700;Wolbachia sp. wRi	463;185	0.290581162324649;0.37037037037037	19;15	17;13	2
GAGA-0028.Scaffold778.0-42479	GAGA-0028	Myrmica rubra	Myrmicinae	PacBio	NA	NA	NA	NA	Scaffold778	0	42479	Scaffold778:28379-28821;Scaffold778:30128-30773;Scaffold778:3322-3679;Scaffold778:500-942	28379;30128;3322;500	28821;30773;3679;942	CP001391.1;737727;738170;1.068E-119;439;444;81.900;Wolbachia sp. wRi;CP001391.1;740731;741380;4.194E-193;682;650;83.300;Wolbachia sp. wRi;CP001391.1;741015;741380;1.843E-133;484;366;89.600;Wolbachia sp. wRi;CP001391.1;737727;738170;1.067E-119;439;444;81.900;Wolbachia sp. wRi	59;399;287	0.289592760180996;0.364341085271318;0.338935574229692;0.287330316742081	NA;26;8	NA;20;8	4
GAGA-0028.Scaffold217.277424-323832	GAGA-0028	Myrmica rubra	Myrmicinae	PacBio	protein_vapar	Wolbachia	Rickettsiales	Alphaproteobacteria	Scaffold217	277424	323832	Scaffold217:297424-300000;Scaffold217:300118-303832	297424;300118	300000;303832	CP003884.1;656617;657572;1.940E-265;922;972;81.200;Wolbachia endosymbiont of Drosophila simulans wHa;AM999887.1;346767;347116;2.872E-100;374;350;83.700;Wolbachia endosymbiont of Culex quinquefasciatus Pel	6533;14971	0.337732919254658;0.340064620355412	NA	NA	2
GAGA-0028.Scaffold283.279552-323004	GAGA-0028	Myrmica rubra	Myrmicinae	PacBio	NA	Wolbachia	Rickettsiales	Alphaproteobacteria	Scaffold283	279552	323004	Scaffold283:299552-300296;Scaffold283:301956-302260;Scaffold283:302653-303004	299552;301956;302653	300296;302260;303004	AM999887.1;86817;87560;9.619E-56;226;746;68.200;Wolbachia endosymbiont of Culex quinquefasciatus Pel;AM999887.1;302123;302407;5.559E-42;181;306;72.800;Wolbachia endosymbiont of Culex quinquefasciatus Pel;AE017321.1;488171;488271;5.969E-11;78;101;77.200;Wolbachia endosymbiont strain TRS of Brugia malayi	126;182;1185	0.31989247311828;0.289473684210526;0.393162393162393	24;NA	23;NA	3
GAGA-0028.Scaffold580.12148-74115	GAGA-0028	Myrmica rubra	Myrmicinae	PacBio	NA	NA	NA	NA	Scaffold580	12148	74115	Scaffold580:32148-32266;Scaffold580:36782-37111;Scaffold580:53219-53504;Scaffold580:54001-54115	32148;36782;53219;54001	32266;37111;53504;54115	CP001391.1;737674;737799;8.298E-16;94;126;76.100;Wolbachia sp. wRi;CP001391.1;737852;738191;1.725E-79;305;340;79.700;Wolbachia sp. wRi;CP001391.1;740732;741018;4.303E-74;287;287;82.200;Wolbachia sp. wRi;CP001391.1;741265;741380;3.585E-41;178;116;93.900;Wolbachia sp. wRi	95;306;288;179	0.254237288135593;0.273556231003039;0.368421052631579;0.350877192982456	NA;11	NA;12	4
GAGA-0028.Scaffold650.12295-72688	GAGA-0028	Myrmica rubra	Myrmicinae	PacBio	NA	NA	NA	NA	Scaffold650	12295	72688	Scaffold650:32295-36101;Scaffold650:37920-41761;Scaffold650:44328-48142;Scaffold650:71896-72543	32295;37920;44328;71896	36101;41761;48142;72543	AP013028.1;646696;647688;6.932E-214;751;1017;76.700;Wolbachia endosymbiont of Cimex lectularius;AP013028.1;823107;824009;4.654E-206;725;928;77.400;Wolbachia endosymbiont of Cimex lectularius;AM999887.1;346767;347116;1.111E-95;359;350;82.900;Wolbachia endosymbiont of Culex quinquefasciatus Pel;CP001391.1;740777;741380;2.268E-176;627;604;83.400;Wolbachia sp. wRi	15422;18153;14493;633	0.342091434576984;0.341838063004426;0.343733613004719;0.366306027820711	NA;4;6	NA;5;7	4
GAGA-0028.Scaffold187.304335-347944	GAGA-0028	Myrmica rubra	Myrmicinae	PacBio	ankyrin_repeat_protein	Wolbachia	Rickettsiales	Alphaproteobacteria	Scaffold187	304335	347944	Scaffold187:324335-324853;Scaffold187:327043-327944	324335;327043	324853;327944	CP001391.1;737674;738190;1.780E-123;451;520;78.800;Wolbachia sp. wRi;CP001391.1;740481;741380;2.773E-219;769;903;79.000;Wolbachia sp. wRi	176;466	0.285714285714286;0.362930077691454	27;26	27	2
GAGA-0028.Scaffold137.314872-362685	GAGA-0028	Myrmica rubra	Myrmicinae	PacBio	NA	NA	NA	NA	Scaffold137	314872	362685	Scaffold137:334872-335072;Scaffold137:337856-338056;Scaffold137:339981-340318;Scaffold137:342001-342685	334872;337856;339981;342001	335072;338056;340318;342685	CP001391.1;741247;741380;6.431E-31;144;134;83.500;Wolbachia sp. wRi;CP001391.1;741229;741380;2.776E-39;172;152;84.800;Wolbachia sp. wRi;CP001391.1;740731;741069;4.305E-57;231;339;75.300;Wolbachia sp. wRi;CP001391.1;737737;738419;5.448E-178;632;686;80.400;Wolbachia sp. wRi	396;424;232;260	0.34;0.376854599406528;0.302631578947368	37;44;58	37;43;44;59	4
GAGA-0028.Scaffold15.3397776-3440446	GAGA-0028	Myrmica rubra	Myrmicinae	PacBio	ankyrin_repeat_protein	Wolbachia	Rickettsiales	Alphaproteobacteria	Scaffold15	3397776	3440446	Scaffold15:3417776-3418218;Scaffold15:3420006-3420446	3417776;3420006	3418218;3420446	CP001391.1;737727;738170;2.387E-118;434;444;81.700;Wolbachia sp. wRi;CP001391.1;740951;741395;1.588E-144;521;445;85.900;Wolbachia sp. wRi	187;271	0.278280542986425;0.347727272727273	25	24;23	2
GAGA-0028.Scaffold17.14863-57056	GAGA-0028	Myrmica rubra	Myrmicinae	PacBio	NA	NA	NA	NA	Scaffold17	14863	57056	Scaffold17:34863-35000;Scaffold17:36614-37056	34863;36614	35000;37056	CP001391.1;741236;741380;1.491E-39;173;145;86.200;Wolbachia sp. wRi;CP001391.1;737727;738170;4.777E-121;443;444;82.200;Wolbachia sp. wRi	174;59	0.343065693430657;0.285067873303167	21;NA	22;NA	2
GAGA-0028.Scaffold17.3487602-3530478	GAGA-0028	Myrmica rubra	Myrmicinae	PacBio	NA	Wolbachia	Rickettsiales	Alphaproteobacteria	Scaffold17	3487602	3530478	Scaffold17:3507602-3508163;Scaffold17:3509097-3510478	3507602;3509097	3508163;3510478	CP001391.1;737674;738242;5.916E-147;529;569;80.600;Wolbachia sp. wRi;CP001391.1;740001;741380;0.000E+00;1366;1383;81.900;Wolbachia sp. wRi	530;850	0.299465240641711;0.349746560463432	26;24	27;24	2
GAGA-0028.Scaffold208.338403-382579	GAGA-0028	Myrmica rubra	Myrmicinae	PacBio	NA	NA	NA	NA	Scaffold208	338403	382579	Scaffold208:358403-358999;Scaffold208:361384-361638;Scaffold208:362143-362579	358403;361384;362143	358999;361638;362579	CP001391.1;740780;741380;8.445E-179;635;601;83.400;Wolbachia sp. wRi;CP001391.1;738353;738608;6.668E-24;121;256;70.700;Wolbachia sp. wRi;CP001391.1;737733;738170;9.234E-114;419;438;81.200;Wolbachia sp. wRi	361;122;53	0.364093959731544;0.37007874015748;0.270642201834862	28;33;NA	29;33;NA	3
GAGA-0028.Scaffold15.3617537-3662723	GAGA-0028	Myrmica rubra	Myrmicinae	PacBio	ankyrin_repeat_protein	Wolbachia	Rickettsiales	Alphaproteobacteria	Scaffold15	3617537	3662723	Scaffold15:3637537-3638297;Scaffold15:3642078-3642723	3637537;3642078	3638297;3642723	CP001391.1;738026;738497;2.071E-78;302;472;74.300;Wolbachia sp. wRi;CP001391.1;740731;741380;2.343E-186;660;650;82.500;Wolbachia sp. wRi	547;411	0.303947368421053;0.351937984496124	21;22	20;21	2
GAGA-0028.Scaffold225.422762-474300	GAGA-0028	Myrmica rubra	Myrmicinae	PacBio	NA	NA	NA	NA	Scaffold225	422762	474300	Scaffold225:442762-443739;Scaffold225:466438-467000;Scaffold225:468103-468545	442762;466438;468103	443739;467000;468545	CP001391.1;737674;738658;9.309E-209;734;985;76.300;Wolbachia sp. wRi;CP001391.1;740830;741395;1.316E-162;581;566;82.800;Wolbachia sp. wRi;CP001391.1;737772;738170;3.322E-106;394;399;81.900;Wolbachia sp. wRi	187;312;149	0.316274309109519;0.361209964412811;0.287330316742081	6;10;NA	8;9;NA	3
GAGA-0028.Scaffold595.24823-68113	GAGA-0028	Myrmica rubra	Myrmicinae	PacBio	NA	NA	NA	NA	Scaffold595	24823	68113	Scaffold595:44823-45171;Scaffold595:45339-45643;Scaffold595:48011-48113	44823;45339;48011	45171;45643;48113	AM999887.1;249288;249448;1.113E-44;190;161;86.300;Wolbachia endosymbiont of Culex quinquefasciatus Pel;AM999887.1;302123;302183;1.334E-09;73;61;86.800;Wolbachia endosymbiont of Culex quinquefasciatus Pel;CP003884.1;73686;73789;9.256E-12;80;104;76.900;Wolbachia endosymbiont of Drosophila simulans wHa	1106;247;81	0.376436781609195;0.286184210526316;0.333333333333333	NA	NA	3
GAGA-0028.Scaffold351.26419-71071	GAGA-0028	Myrmica rubra	Myrmicinae	PacBio	NA	NA	NA	NA	Scaffold351	26419	71071	Scaffold351:46419-47351;Scaffold351:49323-49817;Scaffold351:51001-51071	46419;49323;51001	47351;49817;51071	CP001391.1;737674;738186;1.331E-111;412;517;77.300;Wolbachia sp. wRi;CP001391.1;740733;741069;1.726E-62;249;337;77.000;Wolbachia sp. wRi;CP001391.1;741309;741380;1.995E-17;99;72;90.200;Wolbachia sp. wRi	241;545;100	0.312231759656652;0.366396761133603;0.314285714285714	NA;8	NA;7	3
GAGA-0028.Scaffold9.5042430-5085214	GAGA-0028	Myrmica rubra	Myrmicinae	PacBio	ankyrin_repeat_protein	Wolbachia	Rickettsiales	Alphaproteobacteria	Scaffold9	5042430	5085214	Scaffold9:5062430-5063794;Scaffold9:5064661-5065214	5062430;5064661	5063794;5065214	CP001391.1;740803;741380;2.253E-193;683;578;86.500;Wolbachia sp. wRi;CP001391.1;737674;738231;5.318E-134;486;558;79.300;Wolbachia sp. wRi	819;120	0.345307917888563;0.296564195298373	24;22	23;20	2
GAGA-0028.Scaffold105.517545-594038	GAGA-0028	Myrmica rubra	Myrmicinae	PacBio	NA	NA	NA	NA	Scaffold105	517545	594038	Scaffold105:537545-538180;Scaffold105:538634-538811;Scaffold105:555889-559358;Scaffold105:567001-574038	537545;538634;555889;567001	538180;538811;559358;574038	CP001391.1;730514;731074;1.197E-81;312;566;73.000;Wolbachia sp. wRi;CP001391.1;31237;31415;4.973E-12;81;179;71.000;Wolbachia sp. wRi;AM999887.1;1040766;1041858;0.000E+00;1259;1098;85.500;Wolbachia endosymbiont of Culex quinquefasciatus Pel;CP001391.1;746559;748553;0.000E+00;2353;2001;86.200;Wolbachia sp. wRi	384;82;10066;1345	0.324409448818898;0.293785310734463;0.35168636494667;0.330680687793094	18;NA;36;24	17;NA;35;14	4
GAGA-0028.Scaffold105.519757-579866	GAGA-0028	Myrmica rubra	Myrmicinae	PacBio	NA	NA	NA	NA	Scaffold105	519757	579866	Scaffold105:539757-540119;Scaffold105:541275-542332;Scaffold105:553982-554081;Scaffold105:554711-554839;Scaffold105:559496-559866	539757;541275;553982;554711;559496	540119;542332;554081;554839;559866	CP001391.1;734713;735073;8.011E-40;174;364;71.300;Wolbachia sp. wRi;AM999887.1;437361;438083;1.285E-101;379;726;72.100;Wolbachia endosymbiont of Culex quinquefasciatus Pel;AM999887.1;1420737;1420837;3.094E-18;102;101;82.100;Wolbachia endosymbiont of Culex quinquefasciatus Pel;AM999887.1;1040658;1040782;1.112E-27;133;129;82.900;Wolbachia endosymbiont of Culex quinquefasciatus Pel;CP001391.1;748901…	206;2096;201;120;58	0.281767955801105;0.312204351939451;0.383838383838384;0.453125;0.289189189189189	NA	NA	5
GAGA-0028.Scaffold6.5451347-5517555	GAGA-0028	Myrmica rubra	Myrmicinae	PacBio	ankyrin_repeat_protein	Wolbachia	Rickettsiales	Alphaproteobacteria	Scaffold6	5451347	5517555	Scaffold6:5471347-5472343;Scaffold6:5474745-5475124;Scaffold6:5475255-5476103;Scaffold6:5488891-5489780;Scaffold6:5490509-5492201;Scaffold6:5496706-5497555	5471347;5474745;5475255;5488891;5490509;5496706	5472343;5475124;5476103;5489780;5492201;5497555	AM999887.1;304697;305676;1.266E-169;604;998;73.700;Wolbachia endosymbiont of Culex quinquefasciatus Pel;AM999887.1;302087;302464;5.969E-96;360;381;81.100;Wolbachia endosymbiont of Culex quinquefasciatus Pel;CP003883.1;1194394;1194639;2.399E-50;208;247;78.100;Wolbachia endosymbiont of Drosophila simulans wNo;AM999887.1;306389;307274;1.266E-169;604;891;75.600;Wolbachia endosymbiont of Culex quinque…	302;263;499;95;408;1575	0.289156626506024;0.327176781002639;0.35377358490566;0.310461192350956;0.286643026004728;0.353356890459364	27;NA;28;26	27;NA;24;23	6
GAGA-0028.Scaffold270.0-29207	GAGA-0028	Myrmica rubra	Myrmicinae	PacBio	NA	NA	NA	NA	Scaffold270	0	29207	Scaffold270:5714-6476;Scaffold270:8303-9207	5714;8303	6476;9207	CP001391.1;740001;740761;7.350E-156;559;764;76.000;Wolbachia sp. wRi;CP001391.1;737727;738620;5.270E-168;599;906;75.000;Wolbachia sp. wRi	71;253	0.364829396325459;0.313053097345133	NA;11	NA;11	2
GAGA-0028.Scaffold648.47372-73208	GAGA-0028	Myrmica rubra	Myrmicinae	PacBio	NA	NA	NA	NA	Scaffold648	47372	73208	Scaffold648:67372-67998;Scaffold648:68298-69364	67372;68298	67998;69364	CP001391.1;740735;741371;5.203E-202;712;637;84.900;Wolbachia sp. wRi;CP001391.1;740001;741069;1.650E-232;813;1069;77.200;Wolbachia sp. wRi	382;217	0.362619808306709;0.363977485928705	NA	NA	2
GAGA-0028.Scaffold238.49508-93690	GAGA-0028	Myrmica rubra	Myrmicinae	PacBio	NA	NA	NA	NA	Scaffold238	49508	93690	Scaffold238:69508-70392;Scaffold238:73501-73690	69508;73501	70392;73690	CP001391.1;737733;738620;5.119E-141;509;888;73.700;Wolbachia sp. wRi;CP001391.1;741184;741380;6.674E-58;234;197;86.800;Wolbachia sp. wRi	178;235	0.321266968325792;0.338624338624339	4;3	4;3	2
GAGA-0028.Scaffold21.755853-798667	GAGA-0028	Myrmica rubra	Myrmicinae	PacBio	NA	NA	NA	NA	Scaffold21	755853	798667	Scaffold21:775853-776705;Scaffold21:778501-778667	775853;778501	776705;778667	CP001391.1;737733;738607;1.090E-180;641;875;76.100;Wolbachia sp. wRi;CP001391.1;741231;741395;1.035E-41;180;168;83.900;Wolbachia sp. wRi	642;181	0.305164319248826;0.355421686746988	30;21	32;19	2
GAGA-0028.Scaffold4.7763586-7807641	GAGA-0028	Myrmica rubra	Myrmicinae	PacBio	NA	Wolbachia	Rickettsiales	Alphaproteobacteria	Scaffold4	7763586	7807641	Scaffold4:7783586-7783824;Scaffold4:7786501-7787641	7783586;7786501	7783824;7787641	CP001391.1;737737;737976;2.879E-66;261;240;84.100;Wolbachia sp. wRi;CP001391.1;740248;741380;1.836E-289;1002;1142;79.700;Wolbachia sp. wRi	262;674	0.289915966386555;0.366666666666667	18;19	17;12	2
GAGA-0028.Scaffold4.7891209-7934591	GAGA-0028	Myrmica rubra	Myrmicinae	PacBio	ankyrin_repeat_protein	Wolbachia	Rickettsiales	Alphaproteobacteria	Scaffold4	7891209	7934591	Scaffold4:7911209-7912189;Scaffold4:7914001-7914591	7911209;7914001	7912189;7914591	CP001391.1;737674;737967;1.073E-68;269;294;80.200;Wolbachia sp. wRi;CP001391.1;740490;741069;5.760E-86;327;592;72.400;Wolbachia sp. wRi	533;328	0.326530612244898;0.372881355932203	31;32	33;22	2
GAGA-0028.Scaffold17.59380-102378	GAGA-0028	Myrmica rubra	Myrmicinae	PacBio	ankyrin_repeat_protein	Wolbachia	Rickettsiales	Alphaproteobacteria	Scaffold17	59380	102378	Scaffold17:79380-79948;Scaffold17:80474-80965;Scaffold17:81967-82378	79380;80474;81967	79948;80965;82378	CP001391.1;740775;741380;4.141E-98;367;606;73.500;Wolbachia sp. wRi;CP001391.1;737674;738170;3.563E-126;460;497;80.700;Wolbachia sp. wRi;CP001391.1;740977;741395;1.714E-130;474;419;85.400;Wolbachia sp. wRi	476;72;253	0.36443661971831;0.283095723014257;0.343065693430657	22;NA;24	21;NA;27	3
GAGA-0028.Scaffold4.7981017-8054749	GAGA-0028	Myrmica rubra	Myrmicinae	PacBio	ankyrin_repeat_protein	Wolbachia	Rickettsiales	Alphaproteobacteria	Scaffold4	7981017	8054749	Scaffold4:8001017-8002006;Scaffold4:8002501-8003348;Scaffold4:8032355-8033335;Scaffold4:8034003-8034749	8001017;8002501;8032355;8034003	8002006;8003348;8033335;8034749	CP001391.1;737674;738152;1.719E-113;418;485;78.800;Wolbachia sp. wRi;CP001391.1;740086;740982;3.400E-167;596;897;75.000;Wolbachia sp. wRi;CP001391.1;737674;738341;2.845E-151;543;668;78.100;Wolbachia sp. wRi;CP001391.1;740262;741018;2.956E-144;520;757;75.300;Wolbachia sp. wRi	254;353;302;263	0.320525783619818;0.355371900826446;0.313265306122449;0.368632707774799	NA;20;17	NA;19;17	4
GAGA-0028.Scaffold4.8065735-8153131	GAGA-0028	Myrmica rubra	Myrmicinae	PacBio	NA	NA	NA	NA	Scaffold4	8065735	8153131	Scaffold4:8085735-8086736;Scaffold4:8087147-8088936;Scaffold4:8091730-8092239;Scaffold4:8092653-8092937;Scaffold4:8093087-8094459	8085735;8087147;8091730;8092653;8093087	8086736;8088936;8092239;8092937;8094459	CP001391.1;737674;738658;1.904E-238;833;1003;78.300;Wolbachia sp. wRi;CP001391.1;740001;741018;1.846E-228;800;1018;77.400;Wolbachia sp. wRi;CP001391.1;737674;738190;1.235E-125;458;517;79.600;Wolbachia sp. wRi;CP001391.1;738213;738498;1.857E-65;259;286;80.000;Wolbachia sp. wRi;CP001391.1;740001;741380;0.000E+00;1230;1380;79.700;Wolbachia sp. wRi	467;543;82;92;1167	0.313686313686314;0.356623812185579;0.275049115913556;0.348591549295775;0.357871720116618	4;NA;45	6;NA;43	5
GAGA-0028.Scaffold61.826268-875906	GAGA-0028	Myrmica rubra	Myrmicinae	PacBio	protein_vapar	Wolbachia	Rickettsiales	Alphaproteobacteria	Scaffold61	826268	875906	Scaffold61:846268-850012;Scaffold61:852812-855906	846268;852812	850012;855906	CP001391.1;1073616;1074251;6.932E-214;751;636;85.900;Wolbachia sp. wRi;CP001391.1;929731;930000;6.921E-68;267;270;82.200;Wolbachia sp. wRi	17422;11972	0.339209401709402;0.330639948287007	NA	NA	2
GAGA-0028.Scaffold41.863343-908118	GAGA-0028	Myrmica rubra	Myrmicinae	PacBio	NA	NA	NA	NA	Scaffold41	863343	908118	Scaffold41:883343-883612;Scaffold41:887236-887522;Scaffold41:888001-888118	883343;887236;888001	883612;887522;888118	CP001391.1;737963;738233;3.857E-44;188;271;74.200;Wolbachia sp. wRi;CP001391.1;740731;741018;4.305E-57;231;288;77.700;Wolbachia sp. wRi;CP001391.1;741262;741380;1.926E-41;179;119;93.200;Wolbachia sp. wRi	266;100;180	0.278810408921933;0.381118881118881;0.341880341880342	32;NA;33	31;NA;33	3
GAGA-0028.Scaffold409.74501-116459	GAGA-0028	Myrmica rubra	Myrmicinae	PacBio	NA	NA	NA	NA	Scaffold409	74501	116459	Scaffold409:94501-95530;Scaffold409:96001-96459	94501;96001	95530;96459	CP001391.1;740038;741069;6.200E-218;765;1032;76.800;Wolbachia sp. wRi;CP001391.1;740912;741380;1.024E-143;518;469;84.600;Wolbachia sp. wRi	349;198	0.36734693877551;0.358078602620087	NA	NA	2
GAGA-0028.Scaffold304.76197-118794	GAGA-0028	Myrmica rubra	Myrmicinae	PacBio	ankyrin_repeat_protein	Wolbachia	Rickettsiales	Alphaproteobacteria	Scaffold304	76197	118794	Scaffold304:96197-96498;Scaffold304:98352-98794	96197;98352	96498;98794	CP001391.1;740978;741280;1.151E-105;392;303;88.700;Wolbachia sp. wRi;CP001391.1;737727;738170;2.665E-114;421;444;81.000;Wolbachia sp. wRi	177;422	0.32890365448505;0.280542986425339	19;23	20;24	2
GAGA-0055.Scaffold328.0-38150	GAGA-0055	Gigantiops destructor	Formicinae	stLFR	NA	NA	NA	NA	Scaffold328	0	38150	Scaffold328:10501-11900;Scaffold328:14748-15617;Scaffold328:17020-18150;Scaffold328:5706-5780;Scaffold328:6223-6740;Scaffold328:6953-7576;Scaffold328:7788-8879;Scaffold328:9442-10165	10501;14748;17020;5706;6223;6953;7788;9442	11900;15617;18150;5780;6740;7576;8879;10165	AE017321.1;1015050;1016463;9.015E-199;701;1414;71.600;Wolbachia endosymbiont strain TRS of Brugia malayi;CP003884.1;449016;449665;1.790E-72;282;650;70.000;Wolbachia endosymbiont of Drosophila simulans wHa;CP003883.1;1198160;1198725;7.176E-78;300;576;72.000;Wolbachia endosymbiont of Drosophila simulans wNo;AP013028.1;77123;77198;1.723E-11;79;76;82.800;Wolbachia endosymbiont of Cimex lectularius;CP…	542;4814;1292;80;76;309;3226;1111	0.320228734810579;0.321058688147296;0.327433628318584;0.405405405405405;0.313346228239845;0.319422150882825;0.334555453712191;0.377593360995851	53;61;78;81;101;139;42;68	76;66;50;109;94;82;78;81	8
GAGA-0055.Scaffold3035.0-13569	GAGA-0055	Gigantiops destructor	Formicinae	stLFR	NA	NA	NA	NA	Scaffold3035	0	13569	Scaffold3035:3718-4855	3718	4855	AE017321.1;282140;282399;2.486E-77;298;260;85.700;Wolbachia endosymbiont strain TRS of Brugia malayi	10026	0.331574318	31	50	1
GAGA-0055.Scaffold2260.0-18138	GAGA-0055	Gigantiops destructor	Formicinae	stLFR	NA	NA	NA	NA	Scaffold2260	0	18138	Scaffold2260:13340-17026;Scaffold2260:17156-17630;Scaffold2260:7902-9891	13340;17156;7902	17026;17630;9891	CP003884.1;950001;950499;7.072E-163;582;499;85.900;Wolbachia endosymbiont of Drosophila simulans wHa;CP003883.1;470786;470958;3.744E-26;128;173;76.300;Wolbachia endosymbiont of Drosophila simulans wNo;CP003883.1;1045301;1045400;1.924E-24;122;100;87.000;Wolbachia endosymbiont of Drosophila simulans wNo	27218;272;26123	0.340477482365708;0.362869198312236;0.355957767722474	26;84;77	115;62;63	3
GAGA-0055.Scaffold18202.0-3343	GAGA-0055	Gigantiops destructor	Formicinae	stLFR	NA	NA	NA	NA	Scaffold18202	0	3343	Scaffold18202:1826-1988;Scaffold18202:2097-2789	1826;2097	1988;2789	AP013028.1;1203255;1203418;7.444E-54;220;164;90.200;Wolbachia endosymbiont of Cimex lectularius;AP013028.1;1203585;1204297;1.793E-197;697;713;81.900;Wolbachia endosymbiont of Cimex lectularius	1162;3163	0.345679012345679;0.34971098265896	49;55	21;75	2
GAGA-0063.Scaffold134.0-30038	GAGA-0063	Neoponera goeldii	Ponerinae	PacBio	NA	NA	NA	NA	Scaffold134	0	30038	Scaffold134:8697-10038	8697	10038	AM999887.1;497043;497811;4.622E-94;354;769;71.300;Wolbachia endosymbiont of Culex quinquefasciatus Pel	775	0.28709918	7	6	1
GAGA-0063.Scaffold16.7150525-7191201	GAGA-0063	Neoponera goeldii	Ponerinae	PacBio	ankyrin_repeat_protein	Wolbachia	Rickettsiales	Alphaproteobacteria	Scaffold16	7150525	7191201	Scaffold16:7170525-7171201	7170525	7171201	CP001391.1;741750;742388;1.981E-136;494;639;77.100;Wolbachia sp. wRi	366	0.289940828	NA	NA	1
GAGA-0063.Scaffold16.7197013-7237649	GAGA-0063	Neoponera goeldii	Ponerinae	PacBio	NA	NA	NA	NA	Scaffold16	7197013	7237649	Scaffold16:7217013-7217649	7217013	7217649	CP001391.1;741750;742388;5.916E-147;529;639;78.400;Wolbachia sp. wRi	380	0.298742138	NA	NA	1
GAGA-0063.Scaffold213.26449-67449	GAGA-0063	Neoponera goeldii	Ponerinae	PacBio	ankyrin_repeat_protein	Wolbachia	Rickettsiales	Alphaproteobacteria	Scaffold213	26449	67449	Scaffold213:46449-47449	46449	47449	CP001391.1;741481;742024;4.797E-87;330;552;73.900;Wolbachia sp. wRi	735	0.257	NA	NA	1
GAGA-0063.Scaffold40.103352-155191	GAGA-0063	Neoponera goeldii	Ponerinae	PacBio	NA	NA	NA	NA	Scaffold40	103352	155191	Scaffold40:123352-124709;Scaffold40:125056-125654;Scaffold40:132731-133928;Scaffold40:134429-135191	123352;125056;132731;134429	124709;125654;133928;135191	AM999887.1;497043;498392;3.534E-160;573;1359;69.500;Wolbachia endosymbiont of Culex quinquefasciatus Pel;AM999887.1;496167;496769;2.130E-139;504;603;78.700;Wolbachia endosymbiont of Culex quinquefasciatus Pel;AM999887.1;497218;498386;9.859E-151;542;1199;70.900;Wolbachia endosymbiont of Culex quinquefasciatus Pel;AM999887.1;496000;496769;1.189E-132;482;770;74.300;Wolbachia endosymbiont of Culex qu…	512;505;487;483	0.288872512896094;0.270903010033445;0.2890559732665;0.278215223097113	NA;14;11	NA;13;12	4
GAGA-0063.Scaffold12.4334754-4447000	GAGA-0063	Neoponera goeldii	Ponerinae	PacBio	NA	NA	NA	NA	Scaffold12	4334754	4447000	Scaffold12:4354754-4354818;Scaffold12:4358538-4359544;Scaffold12:4382647-4382728;Scaffold12:4385986-4386974;Scaffold12:4400902-4400966;Scaffold12:4404729-4405746;Scaffold12:4426160-4427000	4354754;4358538;4382647;4385986;4400902;4404729;4426160	4354818;4359544;4382728;4386974;4400966;4405746;4427000	AM999887.1;309554;309619;8.601E-09;70;66;83.300;Wolbachia endosymbiont of Culex quinquefasciatus Pel;CP003883.1;1187815;1188517;1.594E-127;465;703;74.800;Wolbachia endosymbiont of Drosophila simulans wNo;AM999887.1;309539;309619;4.621E-09;71;83;79.500;Wolbachia endosymbiont of Culex quinquefasciatus Pel;CP001391.1;741895;742413;5.939E-130;473;519;80.300;Wolbachia sp. wRi;AM999887.1;309554;309619;…	142;978;72;596;76;479;1296	0.296875;0.267395626242545;0.271604938271605;0.260121457489879;0.28125;0.262536873156342;0.275	NA	NA	7
GAGA-0063.Scaffold239.30315-56158	GAGA-0063	Neoponera goeldii	Ponerinae	PacBio	NA	NA	NA	NA	Scaffold239	30315	56158	Scaffold239:50315-50874;Scaffold239:51296-51847;Scaffold239:52809-53143	50315;51296;52809	50874;51847;53143	CP002528.1;2875726;2875840;4.797E-19;105;115;80.000;Dokdonia sp. 4H-3-7-5;CP001699.1;1533464;1534020;3.213E-62;248;557;71.200;Chitinophaga pinensis DSM 2588;CP002545.1;512718;513047;3.329E-21;112;336;68.100;Pseudopedobacter saltans DSM 12145	774;985;113	0.389982110912343;0.397459165154265;0.401197604790419	NA;4	NA;4	3
GAGA-0074.Scaffold77.1057869-1100790	GAGA-0074	Odontomachus hastatus	Ponerinae	PacBio	NA	NA	NA	NA	Scaffold77	1057869	1100790	Scaffold77:1077869-1078122;Scaffold77:1079806-1080790	1077869;1079806	1078122;1080790	CP011856.1;1210543;1210779;3.857E-44;188;237;78.100;Spiroplasma eriocheiris;CP011856.1;1210060;1210535;1.034E-75;293;477;74.000;Spiroplasma eriocheiris	688;4069	0.284584980237154;0.257113821138211	NA	NA	2
GAGA-0080.Scaffold7.257737-305763	GAGA-0080	Pheidole pallidula	Myrmicinae	PacBio	Flavin-dependent_thymidilate_synthase;UDP-N-acetylglucosamine_1-carboxyvinyltransferase	Wolbachia	Rickettsiales	Alphaproteobacteria	Scaffold7	257737	305763	Scaffold7:277737-279231;Scaffold7:285141-285763	277737;285141	279231;285763	AP013028.1;628814;629999;0.000E+00;1368;1186;85.700;Wolbachia endosymbiont of Cimex lectularius;AE017321.1;968133;968790;1.210E-193;684;658;82.300;Wolbachia endosymbiont strain TRS of Brugia malayi	7286;7602	0.362784471218206;0.360128617363344	53;36	55;34	2
GAGA-0082.Scaffold4.12789954-12830948	GAGA-0082	Pristomyrmex punctatus	Myrmicinae	PacBio	RNA_polymerase_sigma_factor_RpoD	Wolbachia	Rickettsiales	Alphaproteobacteria	Scaffold4	12789954	12830948	Scaffold4:12809954-12810519;Scaffold4:12810726-12810948	12809954;12810726	12810519;12810948	AM999887.1;1132847;1133409;1.588E-144;521;563;80.400;Wolbachia endosymbiont of Culex quinquefasciatus Pel;AM999887.1;1375803;1376030;1.664E-52;216;228;81.600;Wolbachia endosymbiont of Culex quinquefasciatus Pel	7467;62	0.330973451327434;0.346846846846847	23;NA	22;NA	2
GAGA-0082.Scaffold87.30201-92103	GAGA-0082	Pristomyrmex punctatus	Myrmicinae	PacBio	NA	NA	NA	NA	Scaffold87	30201	92103	Scaffold87:50201-52998;Scaffold87:53844-63499;Scaffold87:63601-65271;Scaffold87:65848-70373;Scaffold87:70816-72103	50201;53844;63601;65848;70816	52998;63499;65271;70373;72103	CR543861.1;2524066;2525366;0.000E+00;1090;1301;79.500;Acinetobacter baylyi ADP1;CP012808.1;1762790;1763443;2.204E-149;537;658;79.200;Acinetobacter equi;ALIG01000009.1;242650;244049;0.000E+00;1666;1400;86.700;Acinetobacter venetianus VE-C3;ALIG01000009.1;241719;242368;1.572E-178;634;652;81.900;Acinetobacter venetianus VE-C3;CP000521.1;1161562;1162819;7.021E-302;1043;1259;78.900;Acinetobacter bauma…	42408;107603;46707;147872;6490	0.39327851269217;0.414707405489384;0.405988023952096;0.404640883977901;0.36985236985237	0;NA	1;NA	5
GAGA-0084.Scaffold40.1011359-1067313	GAGA-0084	Aphaenogaster subterranea	Myrmicinae	Chromosome level	NA	NA	NA	NA	Scaffold40	1011359	1067313	Scaffold40:1031359-1032409;Scaffold40:1032629-1035277;Scaffold40:1035535-1040201;Scaffold40:1041308-1045069;Scaffold40:1046139-1046583;Scaffold40:1047155-1047313	1031359;1032629;1035535;1041308;1046139;1047155	1032409;1035277;1040201;1045069;1046583;1047313	AE017321.1;434020;435047;0.000E+00;1189;1028;86.000;Wolbachia endosymbiont strain TRS of Brugia malayi;CP003884.1;170038;171395;0.000E+00;1721;1373;88.200;Wolbachia endosymbiont of Drosophila simulans wHa;CP001391.1;971267;972000;0.000E+00;1115;757;92.700;Wolbachia sp. wRi;CP003883.1;218140;219834;0.000E+00;2428;1695;92.100;Wolbachia endosymbiont of Drosophila simulans wNo;CP003883.1;221899;22233…	41195;32556;45510;5768;567;233	0.363809523809524;0.357250755287009;0.359622803257608;0.377559159797926;0.313063063063063;0.30379746835443	NA;5;11	NA;5;10	6
GAGA-0084.Scaffold30.1574173-1614376	GAGA-0084	Aphaenogaster subterranea	Myrmicinae	Chromosome level	NA	NA	NA	NA	Scaffold30	1574173	1614376	Scaffold30:1594173-1594376	1594173	1594376	CP003883.1;60862;61065;8.613E-26;127;204;74.500;Wolbachia endosymbiont of Drosophila simulans wNo	482	0.280788177	NA	NA	1
GAGA-0084.Scaffold30.1342834-1387887	GAGA-0084	Aphaenogaster subterranea	Myrmicinae	Chromosome level	NA	NA	NA	NA	Scaffold30	1342834	1387887	Scaffold30:1362834-1363173;Scaffold30:1364057-1364820;Scaffold30:1365284-1365511;Scaffold30:1367354-1367887	1362834;1364057;1365284;1367354	1363173;1364820;1365511;1367887	CP001391.1;721535;721854;4.982E-46;194;341;72.300;Wolbachia sp. wRi;AM999887.1;497035;497766;1.437E-80;309;765;68.800;Wolbachia endosymbiont of Culex quinquefasciatus Pel;AM999887.1;496341;496572;1.335E-26;130;232;73.700;Wolbachia endosymbiont of Culex quinquefasciatus Pel;AM999887.1;302009;302533;2.071E-78;302;535;72.800;Wolbachia endosymbiont of Culex quinquefasciatus Pel	333;310;131;230	0.345132743362832;0.288335517693316;0.268722466960352;0.311444652908068	16;NA;3	17;NA;3	4
GAGA-0084.Scaffold30.1407162-1452557	GAGA-0084	Aphaenogaster subterranea	Myrmicinae	Chromosome level	NA	NA	NA	NA	Scaffold30	1407162	1452557	Scaffold30:1427162-1427501;Scaffold30:1428382-1429146;Scaffold30:1429610-1429837;Scaffold30:1432123-1432557	1427162;1428382;1429610;1432123	1427501;1429146;1429837;1432557	CP001391.1;721535;721854;1.242E-40;176;341;71.500;Wolbachia sp. wRi;AM999887.1;497035;497766;1.113E-78;302;766;68.700;Wolbachia endosymbiont of Culex quinquefasciatus Pel;AM999887.1;496341;496572;2.984E-25;125;232;73.300;Wolbachia endosymbiont of Culex quinquefasciatus Pel;AM999887.1;302009;302437;3.332E-72;281;436;74.700;Wolbachia endosymbiont of Culex quinquefasciatus Pel	310;303;126;134	0.342182890855457;0.290575916230366;0.26431718061674;0.283410138248848	5;NA;4	5;NA;4	4
GAGA-0084.Scaffold30.1575303-1620724	GAGA-0084	Aphaenogaster subterranea	Myrmicinae	Chromosome level	NA	NA	NA	NA	Scaffold30	1575303	1620724	Scaffold30:1595303-1595651;Scaffold30:1596679-1597971;Scaffold30:1600300-1600724	1595303;1596679;1600300	1595651;1597971;1600724	CP001391.1;721535;721854;1.035E-41;180;350;70.600;Wolbachia sp. wRi;AM999887.1;496341;497616;5.355E-83;317;1294;63.900;Wolbachia endosymbiont of Culex quinquefasciatus Pel;AM999887.1;302009;302437;1.998E-68;268;429;74.300;Wolbachia endosymbiont of Culex quinquefasciatus Pel	255;450;97	0.359195402298851;0.281733746130031;0.287735849056604	5;6;NA	5;6;NA	3
GAGA-0085.Scaffold5.1004757-1044905	GAGA-0085	Tetramorium caespitum	Myrmicinae	PacBio	NA	Wolbachia	Rickettsiales	Alphaproteobacteria	Scaffold5	1004757	1044905	Scaffold5:1024757-1024905	1024757	1024905	HE660029.1;846970;847122;1.242E-40;176;153;85.600;Wolbachia endosymbiont of Onchocerca ochengi	376	0.310810811	NA	NA	1
GAGA-0087.Scaffold367.0-93047	GAGA-0087	Myrmica scabrinodis	Myrmicinae	PacBio	NA	NA	NA	NA	Scaffold367	0	93047	Scaffold367:1-8433;Scaffold367:12090-12283;Scaffold367:13170-17327;Scaffold367:17538-19745;Scaffold367:19922-21957;Scaffold367:22118-22332;Scaffold367:23411-24956;Scaffold367:25501-25910;Scaffold367:27238-28498;Scaffold367:29761-30861;Scaffold367:31145-32013;Scaffold367:32531-42976;Scaffold367:43277-43541;Scaffold367:44630-45904;Scaffold367:46571-47843;Scaffold367:47985-52468;Scaffold367:52584-55…	1;12090;13170;17538;19922;22118;23411;25501;27238;29761;31145;32531;43277;44630;46571;47985;52584;57419;58724;8549	8433;12283;17327;19745;21957;22332;24956;25910;28498;30861;32013;42976;43541;45904;47843;52468;55698;58608;73047;11432	AE009952.1;1803832;1805851;0.000E+00;1708;2020;78.900;Yersinia pestis KIM10+;FN667742.1;4138693;4138887;6.202E-38;167;195;80.100;Xenorhabdus nematophila ATCC 19061;FN667741.1;2880211;2881040;7.977E-281;973;830;86.100;Xenorhabdus bovienii SS-2004;FN667741.1;3753948;3754911;6.660E-221;775;964;77.900;Xenorhabdus bovienii SS-2004;FN667741.1;2884743;2885317;4.428E-135;490;575;78.900;Xenorhabdus bovien…	328588;923;299183;3593;20005;1099;12532;138;37391;24523;2252;499562;189;24525;26005;45540;40102;25105;458463;48719	0.434535104364326;0.27979274611399;0.484484002886697;0.476212052560036;0.445208845208845;0.289719626168224;0.428478964401295;0.579462102689487;0.49047619047619;0.487272727272727;0.425115207373272;0.497845859262805;0.352272727272727;0.512558869701727;0.431603773584906;0.433415123801026;0.443481053307643;0.442388561816653;0.446484674998255;0.447797433229275	NA;17;9;5;15	NA;17;5;15	20
GAGA-0087.Scaffold1.10039409-10121429	GAGA-0087	Myrmica scabrinodis	Myrmicinae	PacBio	ankyrin_repeat_protein	Wolbachia	Rickettsiales	Alphaproteobacteria	Scaffold1	10039409	10121429	Scaffold1:10059409-10059500;Scaffold1:10061357-10062223;Scaffold1:10066041-10066985;Scaffold1:10067232-10068042;Scaffold1:10098587-10099953;Scaffold1:10101187-10101429	10059409;10061357;10066041;10067232;10098587;10101187	10059500;10062223;10066985;10068042;10099953;10101429	CP001391.1;741288;741380;5.162E-22;114;93;87.000;Wolbachia sp. wRi;CP001391.1;737727;738591;1.973E-153;551;868;73.900;Wolbachia sp. wRi;CP001391.1;740026;740793;1.766E-157;564;768;76.400;Wolbachia sp. wRi;CP001391.1;737674;738533;2.831E-168;600;860;75.600;Wolbachia sp. wRi;CP001391.1;740001;741380;0.000E+00;1258;1380;80.100;Wolbachia sp. wRi;CP001391.1;738257;738500;1.242E-57;233;244;81.100;Wolba…	115;552;364;212;766;55	0.373626373626374;0.301385681293303;0.353813559322034;0.303703703703704;0.346998535871157;0.326446280991736	NA;18	NA;19;13	6
GAGA-0087.Scaffold81.999631-1041148	GAGA-0087	Myrmica scabrinodis	Myrmicinae	PacBio	ankyrin-containing_lipid_protein	Wolbachia	Rickettsiales	Alphaproteobacteria	Scaffold81	999631	1041148	Scaffold81:1019631-1020149;Scaffold81:1020784-1021148	1019631;1020784	1020149;1021148	CP001391.1;737674;738202;3.563E-126;460;529;79.300;Wolbachia sp. wRi;CP001391.1;741021;741380;5.956E-113;416;366;85.500;Wolbachia sp. wRi	82;229	0.283783783783784;0.332417582417582	NA;27	NA;27	2
GAGA-0087.Scaffold233.81982-129583	GAGA-0087	Myrmica scabrinodis	Myrmicinae	PacBio	NA	NA	NA	NA	Scaffold233	81982	129583	Scaffold233:101982-102241;Scaffold233:109516-109583	101982;109516	102241;109583	CP003884.1;830574;830714;3.718E-34;155;141;85.200;Wolbachia endosymbiont of Drosophila simulans wHa;AP013028.1;151410;151480;2.482E-09;72;71;83.000;Wolbachia endosymbiont of Cimex lectularius	870;146	0.355212355212355;0.238805970149254	NA	NA	2
GAGA-0087.Scaffold5.10310493-10353060	GAGA-0087	Myrmica scabrinodis	Myrmicinae	PacBio	ankyrin_repeat_protein	Wolbachia	Rickettsiales	Alphaproteobacteria	Scaffold5	10310493	10353060	Scaffold5:10330493-10331003;Scaffold5:10332679-10333060	10330493;10332679	10331003;10333060	CP001391.1;737674;738171;1.278E-135;492;498;81.900;Wolbachia sp. wRi;CP001391.1;740992;741380;9.206E-131;475;389;87.100;Wolbachia sp. wRi	570;252	0.27843137254902;0.330708661417323	NA;33	NA;32	2
GAGA-0087.Scaffold1.10319609-10363286	GAGA-0087	Myrmica scabrinodis	Myrmicinae	PacBio	ankyrin_repeat_protein	Wolbachia	Rickettsiales	Alphaproteobacteria	Scaffold1	10319609	10363286	Scaffold1:10339609-10339982;Scaffold1:10341261-10341499;Scaffold1:10342510-10343286	10339609;10341261;10342510	10339982;10341499;10343286	CP001391.1;741000;741380;2.387E-118;434;381;85.300;Wolbachia sp. wRi;CP001391.1;740743;740982;5.765E-69;270;240;85.000;Wolbachia sp. wRi;CP001391.1;737674;738460;3.043E-171;610;787;77.000;Wolbachia sp. wRi	235;271;296	0.324396782841823;0.394957983193277;0.291237113402062	13;14	13;14	3
GAGA-0087.Scaffold736.0-33234	GAGA-0087	Myrmica scabrinodis	Myrmicinae	PacBio	NA	NA	NA	NA	Scaffold736	0	33234	Scaffold736:10416-11000;Scaffold736:12794-13234	10416;12794	11000;13234	CP001391.1;740810;741395;1.407E-182;647;586;84.400;Wolbachia sp. wRi;CP001391.1;737729;738170;1.432E-114;422;442;81.200;Wolbachia sp. wRi	346;189	0.35958904109589;0.279545454545455	85;88	86;90	2
GAGA-0087.Scaffold67.1022564-1081211	GAGA-0087	Myrmica scabrinodis	Myrmicinae	PacBio	NA	NA	NA	NA	Scaffold67	1022564	1081211	Scaffold67:1042564-1042702;Scaffold67:1043173-1044135;Scaffold67:1045504-1046762;Scaffold67:1047023-1048371;Scaffold67:1056034-1056176;Scaffold67:1056651-1057267;Scaffold67:1057501-1057762;Scaffold67:1060501-1061211	1042564;1043173;1045504;1047023;1056034;1056651;1057501;1060501	1042702;1044135;1046762;1048371;1056176;1057267;1057762;1061211	AM999887.1;390006;390143;2.486E-26;129;140;80.700;Wolbachia endosymbiont of Culex quinquefasciatus Pel;CP003883.1;115055;115584;9.562E-124;452;538;79.200;Wolbachia endosymbiont of Drosophila simulans wNo;AM999887.1;304414;305676;9.817E-246;857;1263;75.100;Wolbachia endosymbiont of Culex quinquefasciatus Pel;AM999887.1;305924;307274;1.521E-246;860;1351;74.600;Wolbachia endosymbiont of Culex quinqu…	130;2673;236;122;132;791;211;179	0.384057971014493;0.332640332640333;0.285373608903021;0.315281899109792;0.394366197183099;0.323051948051948;0.32183908045977;0.292957746478873	NA;61	NA;64	8
GAGA-0087.Scaffold981.0-23055	GAGA-0087	Myrmica scabrinodis	Myrmicinae	PacBio	NA	NA	NA	NA	Scaffold981	0	23055	Scaffold981:10643-10978;Scaffold981:11213-12210;Scaffold981:7462-8000	10643;11213;7462	10978;12210;8000	CP001391.1;738316;738658;1.725E-79;305;343;80.600;Wolbachia sp. wRi;CP001391.1;737667;738658;7.684E-227;794;999;77.600;Wolbachia sp. wRi;CP001391.1;740835;741380;9.076E-182;645;546;86.200;Wolbachia sp. wRi	306;522;305	0.346268656716418;0.327983951855567;0.356877323420074	NA;9	NA;9	3
GAGA-0087.Scaffold114.761467-802319	GAGA-0087	Myrmica scabrinodis	Myrmicinae	PacBio	ankyrin_repeat_protein	Wolbachia	Rickettsiales	Alphaproteobacteria	Scaffold114	761467	802319	Scaffold114:781467-782319	781467	782319	CP001391.1;740840;741380;1.014E-177;631;541;85.900;Wolbachia sp. wRi	591	0.362676056	29	28	1
GAGA-0087.Scaffold12.5714210-5754855	GAGA-0087	Myrmica scabrinodis	Myrmicinae	PacBio	ankyrin_repeat_protein	Wolbachia	Rickettsiales	Alphaproteobacteria	Scaffold12	5714210	5754855	Scaffold12:5734210-5734855	5734210	5734855	CP001391.1;740731;741380;2.619E-182;646;650;82.000;Wolbachia sp. wRi	382	0.368992248	27	29	1
GAGA-0087.Scaffold1259.0-13748	GAGA-0087	Myrmica scabrinodis	Myrmicinae	PacBio	NA	NA	NA	NA	Scaffold1259	0	13748	Scaffold1259:6224-6782	6224	6782	CP001391.1;737674;737954;8.310E-67;263;281;80.600;Wolbachia sp. wRi	154	0.283154122	NA	NA	1
GAGA-0087.Scaffold18.3163256-3203459	GAGA-0087	Myrmica scabrinodis	Myrmicinae	PacBio	ankyrin_repeat_protein	Wolbachia	Rickettsiales	Alphaproteobacteria	Scaffold18	3163256	3203459	Scaffold18:3183256-3183459	3183256	3183459	CP001391.1;740001;740205;5.559E-42;181;205;79.500;Wolbachia sp. wRi	364	0.310344828	47	47	1
GAGA-0087.Scaffold233.13781-54477	GAGA-0087	Myrmica scabrinodis	Myrmicinae	PacBio	NA	NA	NA	NA	Scaffold233	13781	54477	Scaffold233:33781-34477	33781	34477	AP013028.1;149143;149637;3.654E-170;606;495;87.200;Wolbachia endosymbiont of Cimex lectularius	9183	0.350574713	NA	NA	1
GAGA-0087.Scaffold25.2459233-2499991	GAGA-0087	Myrmica scabrinodis	Myrmicinae	PacBio	ankyrin_repeat_protein	Wolbachia	Rickettsiales	Alphaproteobacteria	Scaffold25	2459233	2499991	Scaffold25:2479233-2479991	2479233	2479991	CP001391.1;737727;738498;5.096E-158;566;772;76.700;Wolbachia sp. wRi	229	0.306068602	24	25	1
GAGA-0087.Scaffold31.1625852-1673131	GAGA-0087	Myrmica scabrinodis	Myrmicinae	PacBio	ankyrin_repeat_protein	Wolbachia	Rickettsiales	Alphaproteobacteria	Scaffold31	1625852	1673131	Scaffold31:1645852-1653131	1645852	1653131	CP001391.1;741528;743180;0.000E+00;1911;1653;85.700;Wolbachia sp. wRi	1197	0.32971562	20	20	1
GAGA-0087.Scaffold37.1925328-1966426	GAGA-0087	Myrmica scabrinodis	Myrmicinae	PacBio	NA	NA	NA	NA	Scaffold37	1925328	1966426	Scaffold37:1945328-1946426	1945328	1946426	AM999887.1;390002;390663;3.534E-160;573;670;79.100;Wolbachia endosymbiont of Culex quinquefasciatus Pel	2962	0.345173042	25	24	1
GAGA-0087.Scaffold4.496923-537906	GAGA-0087	Myrmica scabrinodis	Myrmicinae	PacBio	NA	NA	NA	NA	Scaffold4	496923	537906	Scaffold4:516923-517906	516923	517906	AP013028.1;62689;63072;1.437E-80;309;391;77.500;Wolbachia endosymbiont of Cimex lectularius	5213	0.323499491	NA	NA	1
GAGA-0087.Scaffold60.410501-457634	GAGA-0087	Myrmica scabrinodis	Myrmicinae	PacBio	NA	NA	NA	NA	Scaffold60	410501	457634	Scaffold60:430501-437634	430501	437634	CP001391.1;746709;748711;0.000E+00;2337;2003;86.000;Wolbachia sp. wRi	1056	0.327211552	12	20	1
GAGA-0087.Scaffold809.477-33108	GAGA-0087	Myrmica scabrinodis	Myrmicinae	PacBio	NA	NA	NA	NA	Scaffold809	477	33108	Scaffold809:20477-21573	20477	21573	CP001391.1;46275;46541;7.448E-54;220;288;76.200;Wolbachia sp. wRi	7292	0.326642336	NA	NA	1
GAGA-0087.Scaffold383.0-34826	GAGA-0087	Myrmica scabrinodis	Myrmicinae	PacBio	NA	NA	NA	NA	Scaffold383	0	34826	Scaffold383:14647-14826	14647	14826	AE017321.1;377550;377732;1.073E-34;156;183;79.700;Wolbachia endosymbiont strain TRS of Brugia malayi	157	0.357541899	NA	NA	1
GAGA-0087.Scaffold33.1476747-1520819	GAGA-0087	Myrmica scabrinodis	Myrmicinae	PacBio	ankyrin_repeat_protein	Wolbachia	Rickettsiales	Alphaproteobacteria	Scaffold33	1476747	1520819	Scaffold33:1496747-1497378;Scaffold33:1499069-1499740;Scaffold33:1500233-1500819	1496747;1499069;1500233	1497378;1499740;1500819	CP001391.1;750817;751455;1.028E-126;462;639;76.000;Wolbachia sp. wRi;CP001391.1;741826;742404;5.296E-151;543;582;80.600;Wolbachia sp. wRi;CP001391.1;741826;742413;4.903E-165;589;588;82.300;Wolbachia sp. wRi	166;183;131	0.304278922345483;0.312965722801788;0.302047781569966	NA	NA	3
GAGA-0087.Scaffold383.0-37719	GAGA-0087	Myrmica scabrinodis	Myrmicinae	PacBio	NA	NA	NA	NA	Scaffold383	0	37719	Scaffold383:15834-15952;Scaffold383:17340-17719	15834;17340	15952;17719	AM999887.1;1420591;1420724;2.486E-26;129;134;80.500;Wolbachia endosymbiont of Culex quinquefasciatus Pel;AP013028.1;89492;89882;1.427E-131;478;391;86.900;Wolbachia endosymbiont of Cimex lectularius	245;483	0.389830508474576;0.313984168865435	34	34;31	2
GAGA-0087.Scaffold45.1596058-1639001	GAGA-0087	Myrmica scabrinodis	Myrmicinae	PacBio	ankyrin_repeat_protein	Wolbachia	Rickettsiales	Alphaproteobacteria	Scaffold45	1596058	1639001	Scaffold45:1616058-1616831;Scaffold45:1617166-1617436;Scaffold45:1618506-1619001	1616058;1617166;1618506	1616831;1617436;1619001	CP001391.1;737727;738498;1.374E-138;501;775;74.000;Wolbachia sp. wRi;CP001391.1;738337;738608;1.437E-29;139;272;71.300;Wolbachia sp. wRi;CP001391.1;740878;741380;4.221E-176;626;503;87.600;Wolbachia sp. wRi	216;140;334	0.310478654592497;0.333333333333333;0.347474747474747	NA;31	NA;31	3
GAGA-0087.Scaffold195.163704-206794	GAGA-0087	Myrmica scabrinodis	Myrmicinae	PacBio	ankyrin_repeat_protein	Wolbachia	Rickettsiales	Alphaproteobacteria	Scaffold195	163704	206794	Scaffold195:183704-184277;Scaffold195:186003-186794	183704;186003	184277;186794	CP001391.1;737662;738242;4.927E-148;533;581;80.300;Wolbachia sp. wRi;CP001391.1;740292;741069;2.647E-148;534;793;75.000;Wolbachia sp. wRi	236;271	0.300174520069808;0.372945638432364	17;18	17;18	2
GAGA-0087.Scaffold809.0-33108	GAGA-0087	Myrmica scabrinodis	Myrmicinae	PacBio	NA	NA	NA	NA	Scaffold809	0	33108	Scaffold809:18613-19198;Scaffold809:19686-20334;Scaffold809:32183-32769	18613;19686;32183	19198;20334;32769	CP001391.1;741823;742404;1.581E-161;578;587;81.900;Wolbachia sp. wRi;CP001391.1;751162;751467;5.765E-69;270;306;80.100;Wolbachia sp. wRi;CP001391.1;741826;742413;4.557E-157;562;588;81.200;Wolbachia sp. wRi	92;343;246	0.305982905982906;0.317901234567901;0.298634812286689	NA	NA	3
GAGA-0087.Scaffold45.1846403-1901854	GAGA-0087	Myrmica scabrinodis	Myrmicinae	PacBio	NA	NA	NA	NA	Scaffold45	1846403	1901854	Scaffold45:1866403-1866497;Scaffold45:1866806-1867757;Scaffold45:1867968-1868851;Scaffold45:1894207-1894982;Scaffold45:1895303-1896657	1866403;1866806;1867968;1894207;1895303	1866497;1867757;1868851;1894982;1896657	CP001391.1;741285;741380;2.486E-26;129;96;89.500;Wolbachia sp. wRi;CP001391.1;740004;740761;7.637E-149;535;761;75.300;Wolbachia sp. wRi;CP001391.1;737727;738608;6.147E-140;506;885;72.300;Wolbachia sp. wRi;CP001391.1;737727;738498;1.028E-126;462;777;73.100;Wolbachia sp. wRi;CP001391.1;738323;738477;1.788E-21;113;155;76.900;Wolbachia sp. wRi	130;167;204;177;571	0.372340425531915;0.353312302839117;0.318233295583239;0.318709677419355;0.349335302806499	NA	NA	5
GAGA-0087.Scaffold11.2286133-2329000	GAGA-0087	Myrmica scabrinodis	Myrmicinae	PacBio	NA	NA	NA	NA	Scaffold11	2286133	2329000	Scaffold11:2306133-2306633;Scaffold11:2307187-2307374;Scaffold11:2308039-2309000	2306133;2307187;2308039	2306633;2307374;2309000	CP001391.1;1346578;1346743;1.544E-15;93;166;72.200;Wolbachia sp. wRi;CP003884.1;1118863;1119051;1.242E-57;233;189;87.300;Wolbachia endosymbiont of Drosophila simulans wHa;AP013028.1;384101;384327;4.802E-36;161;227;75.700;Wolbachia endosymbiont of Cimex lectularius	4264;2539;3201	0.302;0.315508021390374;0.31633714880333	NA;25	NA;25	3
GAGA-0087.Scaffold26.242460-285727	GAGA-0087	Myrmica scabrinodis	Myrmicinae	PacBio	ankyrin_repeat_protein	Wolbachia	Rickettsiales	Alphaproteobacteria	Scaffold26	242460	285727	Scaffold26:262460-262900;Scaffold26:265503-265727	262460;265503	262900;265727	CP001391.1;737727;738171;5.334E-117;430;445;81.500;Wolbachia sp. wRi;CP001391.1;741149;741380;4.628E-77;297;232;88.300;Wolbachia sp. wRi	59;298	0.277272727272727;0.339285714285714	NA;30	NA;28	2
GAGA-0087.Scaffold18.2776209-2819547	GAGA-0087	Myrmica scabrinodis	Myrmicinae	PacBio	ankyrin_repeat_protein	Wolbachia	Rickettsiales	Alphaproteobacteria	Scaffold18	2776209	2819547	Scaffold18:2796209-2796671;Scaffold18:2798695-2799547	2796209;2798695	2796671;2799547	CP001391.1;737727;738192;9.930E-117;429;466;80.700;Wolbachia sp. wRi;CP001391.1;740731;740982;2.676E-63;251;252;82.100;Wolbachia sp. wRi	58;620	0.285714285714286;0.359154929577465	NA;34	NA;39	2
GAGA-0087.Scaffold1.262234-306406	GAGA-0087	Myrmica scabrinodis	Myrmicinae	PacBio	NA	NA	NA	NA	Scaffold1	262234	306406	Scaffold1:282234-285594;Scaffold1:286186-286406	282234;286186	285594;286406	CP003883.1;1198613;1198880;2.228E-81;311;268;85.800;Wolbachia endosymbiont of Drosophila simulans wNo;AM999887.1;1454763;1454960;1.113E-78;302;198;93.900;Wolbachia endosymbiont of Culex quinquefasciatus Pel	10930;490	0.336904761904762;0.440909090909091	NA;47	NA;47	2
GAGA-0087.Scaffold215.262597-332774	GAGA-0087	Myrmica scabrinodis	Myrmicinae	PacBio	ankyrin_repeat_protein	Wolbachia	Rickettsiales	Alphaproteobacteria	Scaffold215	262597	332774	Scaffold215:282597-282781;Scaffold215:283338-283653	282597;283338	282781;283653	CP003883.1;1198702;1198874;1.723E-11;79;185;68.600;Wolbachia endosymbiont of Drosophila simulans wNo;AM999887.1;302123;302421;3.718E-34;155;317;70.800;Wolbachia endosymbiont of Culex quinquefasciatus Pel	1038;156	0.331521739130435;0.279365079365079	NA;32	NA;32	2
GAGA-0087.Scaffold61.323782-365255	GAGA-0087	Myrmica scabrinodis	Myrmicinae	PacBio	NA	NA	NA	NA	Scaffold61	323782	365255	Scaffold61:343782-343873;Scaffold61:345082-345255	343782;345082	343873;345255	LN885086.1;2616792;2616884;3.207E-11;79;93;78.400;Candidatus Nitrospira inopinata;CP009553.3;1127348;1127521;3.455E-31;145;174;78.500;Pandoraea pnomenusa	80;359	0.593406593406593;0.589595375722543	NA	NA	2
GAGA-0087.Scaffold1.3555968-3599556	GAGA-0087	Myrmica scabrinodis	Myrmicinae	PacBio	ankyrin_repeat_protein	Wolbachia	Rickettsiales	Alphaproteobacteria	Scaffold1	3555968	3599556	Scaffold1:3575968-3576910;Scaffold1:3577317-3577955;Scaffold1:3579244-3579556	3575968;3577317;3579244	3576910;3577955;3579556	CP001391.1;737674;738187;4.278E-125;457;514;79.900;Wolbachia sp. wRi;CP001391.1;740001;740148;1.491E-39;173;148;85.800;Wolbachia sp. wRi;CP001391.1;741067;741380;1.153E-88;336;314;83.700;Wolbachia sp. wRi	404;490;111	0.320594479830149;0.338557993730408;0.330128205128205	NA;44	NA;44	3
GAGA-0087.Scaffold45.0-28221	GAGA-0087	Myrmica scabrinodis	Myrmicinae	PacBio	NA	NA	NA	NA	Scaffold45	0	28221	Scaffold45:3708-4149;Scaffold45:7779-8221	3708;7779	4149;8221	CP001391.1;737727;738161;5.160E-90;340;443;77.700;Wolbachia sp. wRi;CP001391.1;737727;738161;4.298E-91;344;444;77.700;Wolbachia sp. wRi	69;201	0.27437641723356;0.271493212669683	NA	NA	2
GAGA-0087.Scaffold25.392449-435366	GAGA-0087	Myrmica scabrinodis	Myrmicinae	PacBio	ankyrin_repeat_protein	Wolbachia	Rickettsiales	Alphaproteobacteria	Scaffold25	392449	435366	Scaffold25:412449-413000;Scaffold25:414926-415366	412449;414926	413000;415366	CP001391.1;740843;741395;1.635E-171;611;553;84.400;Wolbachia sp. wRi;CP001391.1;737729;738170;1.432E-114;422;442;81.200;Wolbachia sp. wRi	315;189	0.361161524500907;0.279545454545455	51	52;51	2
GAGA-0087.Scaffold15.4649630-4696000	GAGA-0087	Myrmica scabrinodis	Myrmicinae	PacBio	ankyrin_repeat_protein	Wolbachia	Rickettsiales	Alphaproteobacteria	Scaffold15	4649630	4696000	Scaffold15:4669630-4672999;Scaffold15:4674009-4676000	4669630;4674009	4672999;4676000	CP001391.1;741528;743397;0.000E+00;2039;1872;84.300;Wolbachia sp. wRi;CP001391.1;746007;747993;0.000E+00;2097;1993;83.500;Wolbachia sp. wRi	587;144	0.334520629266845;0.308387744851833	39;41	40;47	2
GAGA-0087.Scaffold45.477500-521139	GAGA-0087	Myrmica scabrinodis	Myrmicinae	PacBio	NA	NA	NA	NA	Scaffold45	477500	521139	Scaffold45:497500-497952;Scaffold45:499502-499845;Scaffold45:500697-501139	497500;499502;500697	497952;499845;501139	CP001391.1;737727;738171;1.923E-92;348;454;77.500;Wolbachia sp. wRi;CP001391.1;741030;741380;7.667E-132;479;351;90.500;Wolbachia sp. wRi;CP001391.1;737727;738161;4.298E-91;344;444;77.700;Wolbachia sp. wRi	72;288;69	0.274336283185841;0.338192419825073;0.271493212669683	NA;33	NA;33	3
GAGA-0087.Scaffold79.481132-525390	GAGA-0087	Myrmica scabrinodis	Myrmicinae	PacBio	NA	NA	NA	NA	Scaffold79	481132	525390	Scaffold79:501132-504587;Scaffold79:505174-505390	501132;505174	504587;505390	CP001391.1;1073616;1074251;3.843E-224;785;636;87.300;Wolbachia sp. wRi;AM999887.1;1454763;1454964;1.725E-79;305;202;93.500;Wolbachia endosymbiont of Culex quinquefasciatus Pel	14474;528	0.335166425470333;0.439814814814815	NA;30	NA;30	2
GAGA-0087.Scaffold1.4999034-5040999	GAGA-0087	Myrmica scabrinodis	Myrmicinae	PacBio	ankyrin_repeat_protein	Wolbachia	Rickettsiales	Alphaproteobacteria	Scaffold1	4999034	5040999	Scaffold1:5019034-5019996;Scaffold1:5020349-5020999	5019034;5020349	5019996;5020999	CP001391.1;737674;738149;3.700E-119;437;476;80.400;Wolbachia sp. wRi;CP001391.1;740007;740667;7.104E-146;526;661;77.700;Wolbachia sp. wRi	484;70	0.322245322245322;0.356923076923077	47;NA	48;NA	2
GAGA-0087.Scaffold4.493873-536500	GAGA-0087	Myrmica scabrinodis	Myrmicinae	PacBio	ankyrin_repeat_protein	Wolbachia	Rickettsiales	Alphaproteobacteria	Scaffold4	493873	536500	Scaffold4:513873-514459;Scaffold4:516164-516500	513873;516164	514459;516500	CP001391.1;741826;742413;5.478E-161;576;588;81.800;Wolbachia sp. wRi;CP001391.1;751130;751467;3.097E-69;271;338;77.800;Wolbachia sp. wRi	141;539	0.302047781569966;0.330357142857143	NA	NA	2
GAGA-0087.Scaffold1.5806365-5881620	GAGA-0087	Myrmica scabrinodis	Myrmicinae	PacBio	NA	NA	NA	NA	Scaffold1	5806365	5881620	Scaffold1:5826365-5827354;Scaffold1:5860008-5860525;Scaffold1:5860855-5861620	5826365;5860008;5860855	5827354;5860525;5861620	CP001391.1;737674;738658;9.422E-253;880;991;79.800;Wolbachia sp. wRi;CP001391.1;737674;738189;3.081E-120;440;519;78.800;Wolbachia sp. wRi;CP001391.1;740007;740761;8.531E-145;522;767;75.200;Wolbachia sp. wRi	451;68;239	0.33164812942366;0.263056092843327;0.351633986928105	30;NA	32;NA	3
GAGA-0087.Scaffold1.6108936-6173212	GAGA-0087	Myrmica scabrinodis	Myrmicinae	PacBio	ankyrin_repeat_protein	Wolbachia	Rickettsiales	Alphaproteobacteria	Scaffold1	6108936	6173212	Scaffold1:6128936-6129499;Scaffold1:6131076-6131822;Scaffold1:6149907-6150759;Scaffold1:6152044-6152809;Scaffold1:6153001-6153212	6128936;6131076;6149907;6152044;6153001	6129499;6131822;6150759;6152809;6153212	CP001391.1;740813;741380;3.145E-181;643;568;85.100;Wolbachia sp. wRi;CP001391.1;737727;738498;4.717E-172;612;772;77.300;Wolbachia sp. wRi;CP001391.1;737674;738266;2.213E-132;481;593;77.700;Wolbachia sp. wRi;CP001391.1;740007;740761;6.120E-157;562;767;76.400;Wolbachia sp. wRi;CP001391.1;741162;741380;2.149E-71;278;219;88.100;Wolbachia sp. wRi	358;338;735;92;279	0.373001776198934;0.294906166219839;0.301643192488263;0.354248366013072;0.350710900473934	22;15;NA;23	17;15;NA;23	5
GAGA-0087.Scaffold13.6246349-6288629	GAGA-0087	Myrmica scabrinodis	Myrmicinae	PacBio	NA	NA	NA	NA	Scaffold13	6246349	6288629	Scaffold13:6266349-6267164;Scaffold13:6268501-6268629	6266349;6268501	6267164;6268629	CP001391.1;737727;738531;1.273E-152;548;817;74.800;Wolbachia sp. wRi;CP001391.1;741245;741380;2.398E-33;152;136;84.500;Wolbachia sp. wRi	235;153	0.317791411042945;0.375	33	47;33	2
GAGA-0087.Scaffold9.6338492-6380227	GAGA-0087	Myrmica scabrinodis	Myrmicinae	PacBio	ankyrin_homolog	Wolbachia	Rickettsiales	Alphaproteobacteria	Scaffold9	6338492	6380227	Scaffold9:6358492-6358996;Scaffold9:6359858-6360227	6358492;6359858	6358996;6360227	CP001391.1;740878;741383;6.579E-160;572;506;85.100;Wolbachia sp. wRi;CP001391.1;740001;740371;2.396E-84;321;371;79.200;Wolbachia sp. wRi	272;51	0.351190476190476;0.338753387533875	30;NA	26;NA	2
GAGA-0087.Scaffold1.6865865-6922044	GAGA-0087	Myrmica scabrinodis	Myrmicinae	PacBio	NA	NA	NA	NA	Scaffold1	6865865	6922044	Scaffold1:6885865-6885977;Scaffold1:6887015-6888013;Scaffold1:6889503-6889615;Scaffold1:6899798-6900615;Scaffold1:6901501-6902044	6885865;6887015;6889503;6899798;6901501	6885977;6888013;6889615;6900615;6902044	CP001391.1;737674;737793;5.758E-18;101;120;78.300;Wolbachia sp. wRi;CP001391.1;737674;738658;1.702E-242;846;1000;78.300;Wolbachia sp. wRi;CP001391.1;741285;741395;5.162E-22;114;114;82.400;Wolbachia sp. wRi;CP001391.1;737674;738383;4.389E-169;603;710;78.800;Wolbachia sp. wRi;CP001391.1;740851;741395;8.492E-162;578;545;83.400;Wolbachia sp. wRi	102;330;115;502;268	0.258928571428571;0.311623246492986;0.321428571428571;0.309669522643819;0.344383057090239	33;24;21;23;25	33;23;18;25	5
GAGA-0087.Scaffold195.46708-96779	GAGA-0087	Myrmica scabrinodis	Myrmicinae	PacBio	NA	NA	NA	NA	Scaffold195	46708	96779	Scaffold195:72355-72571;Scaffold195:73295-76779	72355;73295	72571;76779	AM999887.1;346726;346872;3.333E-55;225;147;93.800;Wolbachia endosymbiont of Culex quinquefasciatus Pel;CP003883.1;990001;990090;2.147E-20;109;90;86.600;Wolbachia endosymbiont of Drosophila simulans wNo	1570;15156	0.444444444444444;0.338691159586682	27;NA	32;NA	2
GAGA-0087.Scaffold89.707142-785989	GAGA-0087	Myrmica scabrinodis	Myrmicinae	PacBio	Leucine-tRNA_ligase;ankyrin_repeat_protein	Synechocococcus_sp.;Wolbachia	NA	NA	Scaffold89	707142	785989	Scaffold89:727142-727238;Scaffold89:765064-765989	727142;765064	727238;765989	CP003594.1;16114;16211;1.601E-08;70;98;75.500;Synechococcus sp. PCC 7502;CP001391.1;737720;738658;8.000E-220;771;939;78.300;Wolbachia sp. wRi	71;466	0.416666666666667;0.323243243243243	NA;19	NA;20	2
GAGA-0087.Scaffold128.55243-96634	GAGA-0087	Myrmica scabrinodis	Myrmicinae	PacBio	ankyrin_repeat_protein	Wolbachia	Rickettsiales	Alphaproteobacteria	Scaffold128	55243	96634	Scaffold128:75243-75746;Scaffold128:76144-76634	75243;76144	75746;76634	CP001391.1;737674;737938;3.097E-69;271;265;82.600;Wolbachia sp. wRi;CP001391.1;740895;741380;1.598E-110;408;492;78.900;Wolbachia sp. wRi	141;544	0.282306163021869;0.342857142857143	NA;22	NA;20	2
GAGA-0087.Scaffold1.7929710-7996999	GAGA-0087	Myrmica scabrinodis	Myrmicinae	PacBio	ankyrin_repeat_protein	Wolbachia	Rickettsiales	Alphaproteobacteria	Scaffold1	7929710	7996999	Scaffold1:7949710-7950091;Scaffold1:7951835-7952322;Scaffold1:7969970-7970801;Scaffold1:7971425-7972320;Scaffold1:7975130-7975780;Scaffold1:7976486-7976999	7949710;7951835;7969970;7971425;7975130;7976486	7950091;7952322;7970801;7972320;7975780;7976999	CP001391.1;740992;741380;1.843E-133;484;389;87.600;Wolbachia sp. wRi;CP001391.1;737674;738171;4.946E-131;476;498;81.300;Wolbachia sp. wRi;CP001391.1;737675;738509;3.777E-180;639;835;77.200;Wolbachia sp. wRi;CP001391.1;740481;741380;8.171E-247;861;900;81.000;Wolbachia sp. wRi;CP001391.1;740007;740667;1.981E-136;494;661;76.700;Wolbachia sp. wRi;CP001391.1;737674;738191;3.313E-123;450;518;79.200;Wol…	257;477;125;547;70;451	0.338582677165354;0.285420944558522;0.293622141997593;0.350837988826816;0.350769230769231;0.288499025341131	23;27;39;37;NA;21	23;29;38;37;NA;20	6
GAGA-0087.Scaffold28.867364-910135	GAGA-0087	Myrmica scabrinodis	Myrmicinae	PacBio	ankyrin_repeat_protein	Wolbachia	Rickettsiales	Alphaproteobacteria	Scaffold28	867364	910135	Scaffold28:887364-888338;Scaffold28:888760-890135	887364;888760	888338;890135	CP001391.1;737674;738658;7.525E-261;907;985;80.700;Wolbachia sp. wRi;CP001391.1;740001;741245;0.000E+00;1200;1245;81.500;Wolbachia sp. wRi	453;868	0.318275154004107;0.352727272727273	NA	NA	2
GAGA-0087.Scaffold89.869268-912087	GAGA-0087	Myrmica scabrinodis	Myrmicinae	PacBio	ankyrin_repeat_protein	Wolbachia	Rickettsiales	Alphaproteobacteria	Scaffold89	869268	912087	Scaffold89:889268-890241;Scaffold89:891502-892087	889268;891502	890241;892087	CP003884.1;530264;530997;2.478E-111;411;734;72.900;Wolbachia endosymbiont of Drosophila simulans wHa;CP001391.1;741826;742412;1.898E-160;574;587;81.700;Wolbachia sp. wRi	15758;64	0.323741007194245;0.295726495726496	16;NA	18;NA	2
GAGA-0087.Scaffold1.9266514-9307847	GAGA-0087	Myrmica scabrinodis	Myrmicinae	PacBio	ankyrin_repeat_protein	Wolbachia	Rickettsiales	Alphaproteobacteria	Scaffold1	9266514	9307847	Scaffold1:9286514-9286873;Scaffold1:9287335-9287847	9286514;9287335	9286873;9287847	CP001391.1;741032;741380;2.772E-90;341;361;81.400;Wolbachia sp. wRi;CP001391.1;737674;738191;3.430E-133;483;518;80.700;Wolbachia sp. wRi	511;84	0.337047353760446;0.28125	39;NA	40;NA	2
GAGA-0087.Scaffold1.9609060-9650376	GAGA-0087	Myrmica scabrinodis	Myrmicinae	PacBio	NA	Wolbachia	Rickettsiales	Alphaproteobacteria	Scaffold1	9609060	9650376	Scaffold1:9629060-9629568;Scaffold1:9630015-9630376	9629060;9630015	9629568;9630376	CP001391.1;737674;738189;3.430E-133;483;516;80.800;Wolbachia sp. wRi;CP001391.1;741021;741380;2.304E-108;401;363;84.600;Wolbachia sp. wRi	85;545	0.281496062992126;0.340720221606648	NA;22	NA;21	2
GAGA-0087.Scaffold1.9700890-9745103	GAGA-0087	Myrmica scabrinodis	Myrmicinae	PacBio	ankyrin_repeat_protein	Wolbachia	Rickettsiales	Alphaproteobacteria	Scaffold1	9700890	9745103	Scaffold1:9720890-9721774;Scaffold1:9723045-9723777;Scaffold1:9724128-9725103	9720890;9723045;9724128	9721774;9723777;9725103	CP001391.1;737727;738603;6.579E-160;572;886;74.800;Wolbachia sp. wRi;CP001391.1;740026;740765;7.350E-156;559;740;76.800;Wolbachia sp. wRi;CP001391.1;737777;738658;1.678E-198;700;882;77.700;Wolbachia sp. wRi	573;112;464	0.299773755656109;0.35792349726776;0.324102564102564	49;NA	47;NA	3
GAGA-0087.Scaffold4.9950512-9995546	GAGA-0087	Myrmica scabrinodis	Myrmicinae	PacBio	NA	NA	NA	NA	Scaffold4	9950512	9995546	Scaffold4:9970512-9971000;Scaffold4:9973386-9973729;Scaffold4:9973997-9974684;Scaffold4:9975325-9975546	9970512;9973386;9973997;9975325	9971000;9973729;9974684;9975546	CP003883.1;110488;110867;9.587E-107;396;380;83.100;Wolbachia endosymbiont of Drosophila simulans wNo;CP003884.1;657224;657587;9.968E-83;316;364;79.400;Wolbachia endosymbiont of Drosophila simulans wHa;CP003884.1;657602;657896;9.617E-39;170;316;71.200;Wolbachia endosymbiont of Drosophila simulans wHa;AE017321.1;656837;657052;8.601E-09;70;223;68.100;Wolbachia endosymbiont strain TRS of Brugia malayi	794;70;1340;71	0.317622950819672;0.341107871720117;0.337700145560408;0.316742081447964	NA;17	NA;17	4
GAGA-0087.Scaffold1.9965378-10019194	GAGA-0087	Myrmica scabrinodis	Myrmicinae	PacBio	ankyrin_repeat_protein	Wolbachia	Rickettsiales	Alphaproteobacteria	Scaffold1	9965378	10019194	Scaffold1:9985378-9985977;Scaffold1:9987003-9987294;Scaffold1:9996278-9996500;Scaffold1:9998424-9999194	9985378;9987003;9996278;9998424	9985977;9987294;9996500;9999194	CP001391.1;740777;741380;1.454E-192;681;604;85.000;Wolbachia sp. wRi;CP001391.1;738325;738617;2.775E-73;285;293;81.500;Wolbachia sp. wRi;CP001391.1;741151;741380;1.113E-78;302;230;89.100;Wolbachia sp. wRi;CP001391.1;737727;738498;3.400E-167;596;772;76.600;Wolbachia sp. wRi	389;52;303;597	0.367278797996661;0.367697594501718;0.364864864864865;0.303896103896104	23;NA;9;15	21;NA;13;14	4
GAGA-0098.Scaffold31.1132742-1173911	GAGA-0098	Harpagoxenus sublaevis	Myrmicinae	PacBio	Lysozyme_M1	Wolbachia	Rickettsiales	Alphaproteobacteria	Scaffold31	1132742	1173911	Scaffold31:1152742-1152879;Scaffold31:1153281-1153911	1152742;1153281	1152879;1153911	CP001391.1;208316;208443;5.758E-18;101;138;76.800;Wolbachia sp. wRi;CP003883.1;614756;615387;4.428E-135;490;632;77.300;Wolbachia endosymbiont of Drosophila simulans wNo	488;1343	0.313868613138686;0.393650793650794	NA	NA	2
GAGA-0098.Scaffold13.1792535-1839990	GAGA-0098	Harpagoxenus sublaevis	Myrmicinae	PacBio	ankyrin_repeat_protein	Wolbachia	Rickettsiales	Alphaproteobacteria	Scaffold13	1792535	1839990	Scaffold13:1812535-1819990	1812535	1819990	CP001391.1;747789;749258;0.000E+00;1423;1470;81.800;Wolbachia sp. wRi	721	0.323943662	22	28	1
GAGA-0098.Scaffold25.356151-396305	GAGA-0098	Harpagoxenus sublaevis	Myrmicinae	PacBio	NA	NA	NA	NA	Scaffold25	356151	396305	Scaffold25:376151-376305	376151	376305	HE983995.1;561397;561552;4.463E-33;151;156;81.400;Cardinium endosymbiont cEper1 of Encarsia pergandiella	152	0.285714286	15	17	1
GAGA-0098.Scaffold525.1105-41285	GAGA-0098	Harpagoxenus sublaevis	Myrmicinae	PacBio	NA	NA	NA	NA	Scaffold525	1105	41285	Scaffold525:21105-21285	21105	21285	HE983995.1;648732;648913;3.719E-51;211;182;85.700;Cardinium endosymbiont cEper1 of Encarsia pergandiella	424	0.327777778	8	8	1
GAGA-0098.Scaffold8.1308058-1349239	GAGA-0098	Harpagoxenus sublaevis	Myrmicinae	PacBio	D-alanine-ligase_A	Sodalis_praecaptivus	Enterobacterales	Gammaproteobacteria	Scaffold8	1308058	1349239	Scaffold8:1328058-1329239	1328058	1329239	CP006569.1;3176645;3177815;2.773E-219;769;1183;74.600;Sodalis praecaptivus	5251	0.578323455	27	28	1
GAGA-0098.Scaffold13.1808644-1852905	GAGA-0098	Harpagoxenus sublaevis	Myrmicinae	PacBio	NA	NA	NA	NA	Scaffold13	1808644	1852905	Scaffold13:1828644-1828840;Scaffold13:1832596-1832905	1828644;1832596	1828840;1832905	CP001391.1;744252;744449;1.073E-51;213;198;83.800;Wolbachia sp. wRi;AE017321.1;488170;488460;8.011E-40;174;311;72.400;Wolbachia endosymbiont strain TRS of Brugia malayi	110;1585	0.357142857142857;0.355987055016181	NA	NA	2
GAGA-0098.Scaffold75.594148-642481	GAGA-0098	Harpagoxenus sublaevis	Myrmicinae	PacBio	ankyrin_repeat_protein	Wolbachia;Ehrlichia_sp.	NA	NA	Scaffold75	594148	642481	Scaffold75:614148-616089;Scaffold75:618778-618913;Scaffold75:619097-619730;Scaffold75:622206-622481	614148;618778;619097;622206	616089;618913;619730;622481	CP001391.1;751988;753332;0.000E+00;1761;1354;88.800;Wolbachia sp. wRi;AP013028.1;763597;763733;5.977E-28;134;137;82.600;Wolbachia endosymbiont of Cimex lectularius;CP003884.1;1207332;1207942;7.724E-64;253;635;69.700;Wolbachia endosymbiont of Drosophila simulans wHa;CP007474.1;642680;642768;1.995E-17;99;91;84.600;Ehrlichia sp. HF	4869;56;471;632	0.357547655847501;0.377777777777778;0.274881516587678;0.265454545454545	16;NA;26;15	21;NA;25;15	4
GAGA-0099.Scaffold111.257276-297816	GAGA-0099	Leptothorax acervorum	Myrmicinae	PacBio	NA	NA	NA	NA	Scaffold111	257276	297816	Scaffold111:277276-277816	277276	277816	AE017321.1;1025317;1025725;3.211E-79;304;421;76.700;Wolbachia endosymbiont strain TRS of Brugia malayi	895	0.307407407	23	20	1
GAGA-0099.Scaffold131.510530-541298	GAGA-0099	Leptothorax acervorum	Myrmicinae	PacBio	NA	NA	NA	NA	Scaffold131	510530	541298	Scaffold131:530530-531708	530530	531708	CP006569.1;3176645;3177609;3.270E-174;620;971;74.300;Sodalis praecaptivus	6848	0.574702886	41	29	1
GAGA-0099.Scaffold173.111344-151524	GAGA-0099	Leptothorax acervorum	Myrmicinae	PacBio	NA	NA	NA	NA	Scaffold173	111344	151524	Scaffold173:131344-131524	131344	131524	HE983995.1;648732;648913;3.719E-51;211;182;85.700;Cardinium endosymbiont cEper1 of Encarsia pergandiella	212	0.327777778	19	18	1
GAGA-0099.Scaffold32.86633-128852	GAGA-0099	Leptothorax acervorum	Myrmicinae	PacBio	NA	NA	NA	NA	Scaffold32	86633	128852	Scaffold32:106633-108852	106633	108852	CP010899.1;390441;392297;0.000E+00;1745;1863;80.900;Spiroplasma kunkelii CR2-3x	9866	0.231185219	19	21	1
GAGA-0099.Scaffold4.5600327-5640504	GAGA-0099	Leptothorax acervorum	Myrmicinae	PacBio	Uncharacterized_protein_in_vnfD_5'region	Cardinium_endosymbiont	Sphingobacteriales	Sphingobacteriia	Scaffold4	5600327	5640504	Scaffold4:5620327-5620504	5620327	5620504	HE983995.1;648735;648913;6.923E-51;210;179;86.000;Cardinium endosymbiont cEper1 of Encarsia pergandiella	211	0.333333333	35	37	1
GAGA-0099.Scaffold4.5774430-5814610	GAGA-0099	Leptothorax acervorum	Myrmicinae	PacBio	Uncharacterized_protein_in_vnfD_5'region	Cardinium_endosymbiont	Sphingobacteriales	Sphingobacteriia	Scaffold4	5774430	5814610	Scaffold4:5794430-5794610	5794430	5794610	HE983995.1;648732;648913;3.719E-51;211;182;85.700;Cardinium endosymbiont cEper1 of Encarsia pergandiella	287	0.333333333	35	34	1
GAGA-0099.Scaffold25.3036785-3076914	GAGA-0099	Leptothorax acervorum	Myrmicinae	PacBio	NA	NA	NA	NA	Scaffold25	3036785	3076914	Scaffold25:3056785-3056914	3056785	3056914	AM999887.1;495168;495289;2.878E-32;148;122;86.800;Wolbachia endosymbiont of Culex quinquefasciatus Pel	726	0.294573643	NA	NA	1
GAGA-0099.Scaffold31.2151173-2191431	GAGA-0099	Leptothorax acervorum	Myrmicinae	PacBio	NA	NA	NA	NA	Scaffold31	2151173	2191431	Scaffold31:2171173-2171431	2171173	2171431	AP013028.1;303773;304033;1.337E-60;242;261;80.800;Wolbachia endosymbiont of Cimex lectularius	193	0.329457364	NA	NA	1
GAGA-0099.Scaffold15.1830026-1961397	GAGA-0099	Leptothorax acervorum	Myrmicinae	PacBio	NA	NA	NA	NA	Scaffold15	1830026	1961397	Scaffold15:1850026-1857679;Scaffold15:1857817-1858785;Scaffold15:1859209-1859747;Scaffold15:1874788-1878497;Scaffold15:1879504-1880398;Scaffold15:1880635-1880770;Scaffold15:1881274-1881815;Scaffold15:1890057-1897404;Scaffold15:1919050-1926499;Scaffold15:1926835-1927795;Scaffold15:1928466-1928629;Scaffold15:1931043-1938470;Scaffold15:1938605-1939075;Scaffold15:1939705-1939856;Scaffold15:1941242-19…	1850026;1857817;1859209;1874788;1879504;1880635;1881274;1890057;1919050;1926835;1928466;1931043;1938605;1939705;1941242	1857679;1858785;1859747;1878497;1880398;1880770;1881815;1897404;1926499;1927795;1928629;1938470;1939075;1939856;1941397	CP001391.1;747780;749264;0.000E+00;1433;1485;81.900;Wolbachia sp. wRi;HE660029.1;154169;155133;8.210E-152;545;969;73.300;Wolbachia endosymbiont of Onchocerca ochengi;AP013028.1;764148;764668;9.930E-117;429;530;78.700;Wolbachia endosymbiont of Cimex lectularius;CP001391.1;748558;749281;1.273E-152;548;724;77.700;Wolbachia sp. wRi;CP001391.1;743528;744460;4.340E-264;918;933;81.500;Wolbachia sp. wRi;…	949;2603;1263;390;112;254;2740;719;795;1721;90;765;319;110;556	0.320789232980531;0.325413223140496;0.282527881040892;0.315448908061472;0.310961968680089;0.274074074074074;0.282809611829945;0.323533414999319;0.323936098805209;0.298958333333333;0.319018404907975;0.326242089672815;0.306382978723404;0.344370860927152;0.283870967741935	NA;17;12;19;33	NA;12;30;34	15
GAGA-0099.Scaffold15.1891865-1960631	GAGA-0099	Leptothorax acervorum	Myrmicinae	PacBio	NA	NA	NA	NA	Scaffold15	1891865	1960631	Scaffold15:1911865-1912174;Scaffold15:1940524-1940631	1911865;1940524	1912174;1940631	AE017321.1;488170;488460;1.604E-42;182;311;73.100;Wolbachia endosymbiont strain TRS of Brugia malayi;AM999887.1;1146498;1146593;1.385E-19;106;96;84.300;Wolbachia endosymbiont of Culex quinquefasciatus Pel	1694;471	0.349514563106796;0.261682242990654	NA	NA	2
GAGA-0099.Scaffold3.1951835-1996512	GAGA-0099	Leptothorax acervorum	Myrmicinae	PacBio	NA	NA	NA	NA	Scaffold3	1951835	1996512	Scaffold3:1971835-1974206;Scaffold3:1976260-1976512	1971835;1976260	1974206;1976512	CP003883.1;220228;221391;0.000E+00;1619;1164;91.200;Wolbachia endosymbiont of Drosophila simulans wNo;CP003883.1;986895;987051;3.996E-20;108;157;75.100;Wolbachia endosymbiont of Drosophila simulans wNo	16127;677	0.36229439055251;0.317460317460317	28;21	27;19	2
GAGA-0099.Scaffold31.2154244-2197169	GAGA-0099	Leptothorax acervorum	Myrmicinae	PacBio	NA	NA	NA	NA	Scaffold31	2154244	2197169	Scaffold31:2174244-2174548;Scaffold31:2176526-2177169	2174244;2176526	2174548;2177169	AM999887.1;304833;305126;2.398E-67;265;306;79.400;Wolbachia endosymbiont of Culex quinquefasciatus Pel;AM999887.1;306665;307296;3.089E-103;384;645;73.100;Wolbachia endosymbiont of Culex quinquefasciatus Pel	266;56	0.325657894736842;0.290824261275272	25;NA	26;NA	2
GAGA-0099.Scaffold15.2265014-2317549	GAGA-0099	Leptothorax acervorum	Myrmicinae	PacBio	DEAD-box_ATP-dependent_RNA_helicase	Wolbachia	Rickettsiales	Alphaproteobacteria	Scaffold15	2265014	2317549	Scaffold15:2285014-2285518;Scaffold15:2286786-2287126;Scaffold15:2287313-2287424;Scaffold15:2287828-2288693;Scaffold15:2290034-2297549	2285014;2286786;2287313;2287828;2290034	2285518;2287126;2287424;2288693;2297549	AE017321.1;918446;918955;3.200E-113;417;510;79.000;Wolbachia endosymbiont strain TRS of Brugia malayi;AE017321.1;918987;919351;8.013E-57;230;365;74.700;Wolbachia endosymbiont strain TRS of Brugia malayi;CP001391.1;1301287;1301400;3.996E-20;108;114;81.500;Wolbachia sp. wRi;AP013028.1;762512;763365;1.327E-128;468;867;71.300;Wolbachia endosymbiont of Cimex lectularius;CP001391.1;741736;742712;3.465E…	1379;791;109;1154;842	0.273809523809524;0.311764705882353;0.342342342342342;0.305202312138728;0.323885562208916	23;NA;21	25;NA;31	5
GAGA-0099.Scaffold142.226089-269676	GAGA-0099	Leptothorax acervorum	Myrmicinae	PacBio	phosphocholine_transferase_AnkX	Wolbachia	Rickettsiales	Alphaproteobacteria	Scaffold142	226089	269676	Scaffold142:246089-246627;Scaffold142:247925-248822;Scaffold142:249541-249676	246089;247925;249541	246627;248822;249676	CP001391.1;751523;751939;2.462E-145;524;417;88.200;Wolbachia sp. wRi;AP013028.1;762512;763397;9.171E-148;532;898;73.100;Wolbachia endosymbiont of Cimex lectularius;AP013028.1;763597;763733;5.357E-32;148;137;84.700;Wolbachia endosymbiont of Cimex lectularius	1842;979;468	0.371747211895911;0.324414715719064;0.385185185185185	49;47;40	50;46;40	3
GAGA-0099.Scaffold719.0-19087	GAGA-0099	Leptothorax acervorum	Myrmicinae	PacBio	NA	NA	NA	NA	Scaffold719	0	19087	Scaffold719:2562-2655;Scaffold719:3182-3425;Scaffold719:3716-4210;Scaffold719:6514-6692	2562;3182;3716;6514	2655;3425;4210;6692	AL111168.1;396607;396685;1.111E-10;77;79;82.200;Campylobacter jejuni subsp. jejuni NCTC 11168 = ATCC 700819;AE017198.1;561343;561579;5.969E-11;78;241;69.600;Lactobacillus johnsonii NCC 533;CP007541.1;323957;324444;8.011E-40;174;488;67.300;Coxiella endosymbiont of Amblyomma americanum;CP001649.1;69508;69676;6.196E-21;111;171;75.100;Desulfovibrio salexigens DSM 2638	1310;810;5754;3283	0.333333333333333;0.406882591093117;0.466292134831461	NA;14	NA;15;14	4
GAGA-0099.Scaffold20.2638162-2679328	GAGA-0099	Leptothorax acervorum	Myrmicinae	PacBio	probable_autolytic_lysozyme	Wolbachia	Rickettsiales	Alphaproteobacteria	Scaffold20	2638162	2679328	Scaffold20:2658162-2658792;Scaffold20:2659194-2659328	2658162;2659194	2658792;2659328	CP003883.1;614756;615387;9.899E-134;485;632;77.200;Wolbachia endosymbiont of Drosophila simulans wNo;CP003884.1;223044;223171;8.929E-19;104;134;77.600;Wolbachia endosymbiont of Drosophila simulans wHa	1067;274	0.392063492063492;0.32089552238806	NA	NA	2
GAGA-0099.Scaffold25.3020818-3070729	GAGA-0099	Leptothorax acervorum	Myrmicinae	PacBio	NA	NA	NA	NA	Scaffold25	3020818	3070729	Scaffold25:3040818-3040941;Scaffold25:3044745-3045959;Scaffold25:3049028-3050556;Scaffold25:3050679-3050729	3040818;3044745;3049028;3050679	3040941;3045959;3050556;3050729	CP003884.1;1198889;1199013;7.720E-30;140;125;84.800;Wolbachia endosymbiont of Drosophila simulans wHa;AP013028.1;363557;364303;3.227E-269;935;753;87.700;Wolbachia endosymbiont of Cimex lectularius;AE017321.1;932831;933785;6.598E-238;831;974;79.400;Wolbachia endosymbiont strain TRS of Brugia malayi;CP003884.1;395947;395998;9.960E-15;90;52;98.000;Wolbachia endosymbiont of Drosophila simulans wHa	289;22744;16284;91	0.252032520325203;0.364909390444811;0.325916230366492;0.34	NA;17;15	NA;17;13	4
GAGA-0099.Scaffold25.3076674-3107057	GAGA-0099	Leptothorax acervorum	Myrmicinae	PacBio	NA	NA	NA	NA	Scaffold25	3076674	3107057	Scaffold25:3096674-3097672;Scaffold25:3098238-3098993;Scaffold25:3106140-3107055	3096674;3098238;3106140	3097672;3098993;3107055	AP013028.1;363426;364421;0.000E+00;1270;999;88.400;Wolbachia endosymbiont of Cimex lectularius;CP001391.1;1290608;1291370;1.639E-293;1016;763;89.700;Wolbachia sp. wRi;CP010401.1;207477;208104;4.083E-166;593;656;80.000;Bartonella ancashensis	4614;34093;54488	0.314629258517034;0.512582781456954;0.407650273224044	9;11;7	10;11;8	3
GAGA-0099.Scaffold824.0-12435	GAGA-0099	Leptothorax acervorum	Myrmicinae	PacBio	NA	NA	NA	NA	Scaffold824	0	12435	Scaffold824:3863-7977;Scaffold824:9923-10070	3863;9923	7977;10070	CP001391.1;741736;742884;0.000E+00;1135;1149;82.000;Wolbachia sp. wRi;CP001391.1;747673;747821;4.973E-12;81;149;73.800;Wolbachia sp. wRi	502;82	0.340787554691298;0.204081632653061	11;NA	3;NA	2
GAGA-0099.Scaffold137.422869-497653	GAGA-0099	Leptothorax acervorum	Myrmicinae	PacBio	NA	NA	NA	NA	Scaffold137	422869	497653	Scaffold137:442869-442919;Scaffold137:443047-443829;Scaffold137:456306-457807;Scaffold137:458294-460044;Scaffold137:469095-469598;Scaffold137:469699-472677;Scaffold137:476647-477653	442869;443047;456306;458294;469095;469699;476647	442919;443829;457807;460044;469598;472677;477653	CP003884.1;395947;395998;2.226E-13;86;52;96.100;Wolbachia endosymbiont of Drosophila simulans wHa;AP013028.1;830999;831335;4.797E-87;330;337;82.400;Wolbachia endosymbiont of Cimex lectularius;CP003884.1;533422;533575;2.675E-29;139;154;79.800;Wolbachia endosymbiont of Drosophila simulans wHa;AM999887.1;300001;301119;1.415E-165;591;1119;72.200;Wolbachia endosymbiont of Culex quinquefasciatus Pel;CP…	174;6916;3804;4557;3928;87637;12171	0.34;0.317135549872123;0.312458361092605;0.321142857142857;0.347912524850895;0.365010073875084;0.302186878727634	NA;27	NA;25	7
GAGA-0099.Scaffold25.34385-82043	GAGA-0099	Leptothorax acervorum	Myrmicinae	PacBio	NA	NA	NA	NA	Scaffold25	34385	82043	Scaffold25:54385-55357;Scaffold25:59620-61504;Scaffold25:61709-62043	54385;59620;61709	55357;61504;62043	CP010899.1;77054;77171;1.790E-38;169;118;92.300;Spiroplasma kunkelii CR2-3x;CP010899.1;630154;630263;7.175E-27;131;113;86.700;Spiroplasma kunkelii CR2-3x;CP010899.1;1026637;1026983;4.631E-60;241;347;75.200;Spiroplasma kunkelii CR2-3x	3103;8458;447	0.25;0.233014861995754;0.245508982035928	35;NA	30;NA	3
GAGA-0103.Scaffold23.35482-859980	GAGA-0103	Myrmecina graminicola	Myrmicinae	PacBio	NA	NA	NA	NA	Scaffold23	35482	859980	Scaffold23:101475-102181;Scaffold23:108271-110511;Scaffold23:110846-112564;Scaffold23:113398-113927;Scaffold23:116771-117143;Scaffold23:117952-118020;Scaffold23:118260-119233;Scaffold23:119555-120033;Scaffold23:122763-123423;Scaffold23:125115-125255;Scaffold23:125509-125752;Scaffold23:125965-126050;Scaffold23:127117-127254;Scaffold23:127576-128284;Scaffold23:128452-128657;Scaffold23:129055-129285…	101475;108271;110846;113398;116771;117952;118260;119555;122763;125115;125509;125965;127117;127576;128452;129055;130226;130707;133083;134053;136067;137700;140762;141568;142461;145685;150234;150753;152454;157584;159208;159882;163640;165948;167573;168988;173634;176787;177905;178634;181485;182146;183186;184535;188491;190753;192034;200320;204270;205079;210952;214293;217292;218180;218850;223598;230817;…	102181;110511;112564;113927;117143;118020;119233;120033;123423;125255;125752;126050;127254;128284;128657;129285;130320;131309;133893;135965;136248;137950;141336;141937;143588;145857;150463;151433;153447;158194;159596;159939;163776;167000;168094;170611;173691;177229;178289;179441;181607;182368;184250;185755;189142;191878;192745;202325;204391;206340;214112;217120;217976;218440;219077;224301;231655;…	CP003021.1;44096;44800;1.998E-51;212;705;66.400;Mycoplasma putrefaciens KS1;CP005078.1;341148;342824;6.264E-262;911;1687;72.400;Spiroplasma syrphidicola EA-1;CP005941.1;1436233;1436646;9.273E-46;193;418;70.800;Streptococcus iniae SF1;CP003021.1;219488;219822;1.856E-31;146;335;70.500;Mycoplasma putrefaciens KS1;CP010899.1;318862;319235;9.267E-29;137;374;69.400;Spiroplasma kunkelii CR2-3x;CP014164.…	2550;39144;15296;706;241;74;14826;124;2828;182;198;71;726;37707;419;747;336;194;427;23613;80;116;2969;92;23235;1194;3850;4318;2032;207;11198;72;73;10605;2170;7349;722;318;29705;295;151;1427;18827;1509;4717;6230;15337;93;28515;121687;158827;4806;94;315;1143;1244;410;863;438582;4834;5405;2495;620;409;178;5781;755;165;826;1827;2643;160;4332;266;1118;503;1794;1323;426;59753;138290;83;2251;164;545;189…	0.361189801699717;0.312946428571429;0.335273573923166;0.302457466918715;0.287634408602151;0.279411764705882;0.311408016443988;0.332635983263598;0.315151515151515;0.328571428571429;0.296296296296296;0.4;0.364963503649635;0.360169491525424;0.385365853658537;0.308695652173913;0.361702127659574;0.323920265780731;0.322222222222222;0.354602510460251;0.298342541436464;0.24;0.322299651567944;0.3252032520…	27;NA;36;32;22;31;38;37;34;24;23;35;42;40;11;29;60;54;43;46;47;50;44;21;63;33;65;28;45;30;16;68;55;7;13;12;14;18;25;86;10;85;19;41;52;58	24;NA;38;35;29;25;30;37;39;27;22;26;34;46;10;31;52;60;50;55;28;21;63;23;71;64;36;14;54;75;59;7;12;16;15;19;45;33;48;40;13;47;86;8;88;44;66;1	374
GAGA-0103.Scaffold554.0-56912	GAGA-0103	Myrmecina graminicola	Myrmicinae	PacBio	NA	NA	NA	NA	Scaffold554	0	56912	Scaffold554:10225-10653;Scaffold554:11801-11920;Scaffold554:20266-20529;Scaffold554:32429-32787;Scaffold554:33830-34145;Scaffold554:36829-36912;Scaffold554:4669-4848	10225;11801;20266;32429;33830;36829;4669	10653;11920;20529;32787;34145;36912;4848	CP001739.1;897833;898259;1.287E-16;96;430;66.200;Sebaldella termitidis ATCC 33386;HG917869.1;402017;402118;1.196E-13;87;102;79.400;Clostridium bornimense;CP000673.1;2709479;2709588;5.351E-15;91;110;78.100;Clostridium kluyveri DSM 555;AP009484.1;1037766;1037928;4.627E-26;128;163;77.300;Macrococcus caseolyticus JCSC5402;CP001056.1;1447947;1448244;1.153E-20;110;299;70.100;Clostridium botulinum B str…	97;164;172;897;265;71;206	0.322429906542056;0.352941176470588;0.384030418250951;0.335195530726257;0.301587301587302;0.265060240963855	NA;6;15	NA;6;15	7
GAGA-0103.Scaffold522.0-41937	GAGA-0103	Myrmecina graminicola	Myrmicinae	PacBio	NA	NA	NA	NA	Scaffold522	0	41937	Scaffold522:10230-10605;Scaffold522:11353-11643;Scaffold522:21340-21937	10230;11353;21340	10605;11643;21937	CP003884.1;326121;326496;4.443E-118;433;376;85.600;Wolbachia endosymbiont of Drosophila simulans wHa;CP003884.1;326391;326678;1.996E-85;325;288;85.000;Wolbachia endosymbiont of Drosophila simulans wHa;CP003884.1;326349;326919;6.329E-167;595;593;82.200;Wolbachia endosymbiont of Drosophila simulans wHa	220;617;592	0.32;0.358620689655172;0.324958123953099	NA;13;9	NA;13;8	3
GAGA-0103.Scaffold200.85588-243521	GAGA-0103	Myrmecina graminicola	Myrmicinae	PacBio	NA	NA	NA	NA	Scaffold200	85588	243521	Scaffold200:105588-106636;Scaffold200:108089-108416;Scaffold200:108652-108799;Scaffold200:110608-111229;Scaffold200:112196-112486;Scaffold200:113526-113753;Scaffold200:113945-116388;Scaffold200:116641-116912;Scaffold200:119005-119280;Scaffold200:119630-120437;Scaffold200:122768-123177;Scaffold200:124469-124987;Scaffold200:125408-126340;Scaffold200:126919-127983;Scaffold200:128505-130036;Scaffold2…	105588;108089;108652;110608;112196;113526;113945;116641;119005;119630;122768;124469;125408;126919;128505;130260;131841;133486;134577;136156;136502;138386;140233;147128;150488;154859;156253;157887;158249;161056;162196;163449;166133;166590;167981;171081;174398;175488;178421;179624;182095;182941;183308;183821;185085;186034;186311;187635;189382;200407;201362;203019;203635;205145;209179;210016;212288;…	106636;108416;108799;111229;112486;113753;116388;116912;119280;120437;123177;124987;126340;127983;130036;130410;133349;134353;134727;136341;137927;138540;141939;148613;151119;155647;156777;157969;158422;161954;162758;163661;166216;167195;168243;171878;175127;176170;179319;180202;182243;183163;183513;184130;185233;186166;186824;188088;189703;200793;201662;203145;204211;206452;209574;211763;212410;…	CP012622.1;293436;293660;3.455E-31;145;225;74.200;Spiroplasma cantharicola;FO681348.1;181736;182061;8.929E-19;104;329;67.300;Acholeplasma brassicae;CP005074.1;37574;37721;9.960E-15;90;149;73.800;Spiroplasma taiwanense CT-1;CP010899.1;1126953;1127557;2.312E-74;288;607;71.200;Spiroplasma kunkelii CR2-3x;CP001668.1;440063;440356;7.711E-13;84;294;67.200;Mycoplasma mycoides subsp. capri str. GM12;CP00…	2594;210;91;7767;85;106;9047;147;521;2991;958;9282;25298;3722;16591;358;1694;4118;437;886;1327;2380;20184;182;2653;1909;190;79;929;487;81;72;174;253;908;612;1275;4650;3475;164;80;467;73;86;1493;5088;270;120;722;180;648;9649;239;24540;77;169;170;1365;9822;740	0.357824427480916;0.259938837920489;0.272108843537415;0.342995169082126;0.324137931034483;0.343612334801762;0.369218174375767;0.350553505535055;0.403636363636364;0.374225526641884;0.415647921760391;0.393822393822394;0.373390557939914;0.375;0.365774003919007;0.24;0.340185676392573;0.34717416378316;0.340540540540541;0.329122807017544;0.24025974025974;0.334701055099648;0.296296296296296;0.3502377179…	1;455;NA;557;608;825;274;410;395;381;313;387;400;956;105;392	454;490;NA;555;594;803;351;392;385;365;327;401;400;939;76;407	62
GAGA-0103.Scaffold64.1044292-1190867	GAGA-0103	Myrmecina graminicola	Myrmicinae	PacBio	NA	NA	NA	NA	Scaffold64	1044292	1190867	Scaffold64:1064292-1064617;Scaffold64:1066978-1067067;Scaffold64:1072645-1073399;Scaffold64:1078613-1080537;Scaffold64:1095709-1096670;Scaffold64:1099647-1100789;Scaffold64:1120056-1120320;Scaffold64:1133417-1133618;Scaffold64:1137649-1138331;Scaffold64:1141773-1142659;Scaffold64:1143157-1144021;Scaffold64:1144939-1145102;Scaffold64:1147085-1147581;Scaffold64:1148376-1148695;Scaffold64:1151803-11…	1064292;1066978;1072645;1078613;1095709;1099647;1120056;1133417;1137649;1141773;1143157;1144939;1147085;1148376;1151803;1152435;1155520;1157722;1164934;1166986;1170431	1064617;1067067;1073399;1080537;1096670;1100789;1120320;1133618;1138331;1142659;1144021;1145102;1147581;1148695;1151908;1153243;1155946;1160787;1165614;1169401;1170867	CP005078.1;955836;956162;5.357E-32;148;327;70.400;Spiroplasma syrphidicola EA-1;CP005078.1;958467;958557;7.165E-10;74;91;79.300;Spiroplasma syrphidicola EA-1;CP005077.1;1083580;1083937;2.880E-49;205;358;72.900;Spiroplasma chrysopicola DF-1;CP000123.1;546216;546598;1.073E-34;156;389;69.200;Mycoplasma capricolum subsp. capricolum ATCC 27343;CP009770.1;824827;825791;6.184E-106;393;965;69.400;Ureapla…	149;75;804;70518;1274;885;189;130;1532;5801;2783;80;28018;62;147;2076;942;41576;3494;13695;857	0.267692307692308;0.235955056179775;0.282493368700265;0.39968814968815;0.284079084287201;0.270577933450088;0.310606060606061;0.293532338308458;0.354838709677419;0.400677200902935;0.371527777777778;0.392638036809816;0.502016129032258;0.322884012539185;0.342857142857143;0.370049504950495;0.373239436619718;0.377814029363785;0.376470588235294;0.353623188405797;0.376146788990826	302;NA;289;294;319;280;600;652;488;670;408;554	299;NA;294;302;326;238;600;639;491;417;414;531	21
GAGA-0103.Scaffold1038.0-18640	GAGA-0103	Myrmecina graminicola	Myrmicinae	PacBio	NA	NA	NA	NA	Scaffold1038	0	18640	Scaffold1038:10998-11903;Scaffold1038:13953-14465	10998;13953	11903;14465	CP003884.1;656485;657362;2.403E-213;750;900;78.900;Wolbachia endosymbiont of Drosophila simulans wHa;AP013028.1;497888;498399;6.650E-109;403;514;77.300;Wolbachia endosymbiont of Cimex lectularius	2245;1372	0.329281767955801;0.322265625	NA	NA	2
GAGA-0103.Scaffold14.99700-155315	GAGA-0103	Myrmecina graminicola	Myrmicinae	PacBio	NA	NA	NA	NA	Scaffold14	99700	155315	Scaffold14:119700-119843;Scaffold14:125555-126567;Scaffold14:127668-128991;Scaffold14:129434-129690;Scaffold14:130174-131354;Scaffold14:131577-132955;Scaffold14:135003-135315	119700;125555;127668;129434;130174;131577;135003	119843;126567;128991;129690;131354;132955;135315	CP003504.1;1308369;1308513;2.068E-10;76;145;72.100;Enterococcus hirae ATCC 9790;CP003021.1;296810;297697;2.149E-37;165;889;63.600;Mycoplasma putrefaciens KS1;CP007520.1;610834;611163;1.335E-26;130;333;69.700;Mycoplasma yeatsii GM274B;CP007520.1;249653;249878;4.627E-26;128;226;73.100;Mycoplasma yeatsii GM274B;CP007520.1;250373;250926;8.011E-40;174;554;67.300;Mycoplasma yeatsii GM274B;CP005074.1;86…	77;1197;13238;674;1163;7002;41348	0.293706293706294;0.342885375494071;0.36583522297808;0.31640625;0.386440677966102;0.396952104499274;0.372990353697749	NA;0	NA;0	7
GAGA-0103.Scaffold1001.0-20324	GAGA-0103	Myrmecina graminicola	Myrmicinae	PacBio	NA	NA	NA	NA	Scaffold1001	0	20324	Scaffold1001:14448-14970	14448	14970	CP010899.1;1295797;1296323;7.180E-44;187;527;69.000;Spiroplasma kunkelii CR2-3x	278	0.256704981	8	9	1
GAGA-0103.Scaffold101.528692-569549	GAGA-0103	Myrmecina graminicola	Myrmicinae	PacBio	NA	NA	NA	NA	Scaffold101	528692	569549	Scaffold101:548692-549549	548692	549549	CP003884.1;656533;657315;1.109E-224;787;810;81.600;Wolbachia endosymbiont of Drosophila simulans wHa	2825	0.323220537	NA	NA	1
GAGA-0103.Scaffold107.709446-746682	GAGA-0103	Myrmecina graminicola	Myrmicinae	PacBio	NA	NA	NA	NA	Scaffold107	709446	746682	Scaffold107:729446-730061	729446	730061	AP013028.1;76342;76904;1.195E-98;369;616;71.700;Wolbachia endosymbiont of Cimex lectularius	436	0.315447154	NA	NA	1
GAGA-0103.Scaffold12.3278972-3319340	GAGA-0103	Myrmecina graminicola	Myrmicinae	PacBio	NA	NA	NA	NA	Scaffold12	3278972	3319340	Scaffold12:3298972-3299340	3298972	3299340	CP003884.1;322442;322808;4.460E-84;320;370;80.100;Wolbachia endosymbiont of Drosophila simulans wHa	892	0.345108696	28	28	1
GAGA-0103.Scaffold139.315145-355567	GAGA-0103	Myrmecina graminicola	Myrmicinae	PacBio	NA	NA	NA	NA	Scaffold139	315145	355567	Scaffold139:335145-335567	335145	335567	CP012622.1;228503;228923;9.972E-32;147;423;68.700;Spiroplasma cantharicola	739	0.312796209	NA	NA	1
GAGA-0103.Scaffold195.0-26893	GAGA-0103	Myrmecina graminicola	Myrmicinae	PacBio	NA	NA	NA	NA	Scaffold195	0	26893	Scaffold195:5639-6893	5639	6893	CP003884.1;320870;321734;7.601E-166;592;865;75.600;Wolbachia endosymbiont of Drosophila simulans wHa	3049	0.36523126	126	130	1
GAGA-0103.Scaffold207.211447-245259	GAGA-0103	Myrmecina graminicola	Myrmicinae	PacBio	NA	NA	NA	NA	Scaffold207	211447	245259	Scaffold207:231447-232705	231447	232705	CP003884.1;320742;321734;5.203E-202;712;999;76.200;Wolbachia endosymbiont of Drosophila simulans wHa	2798	0.364069952	16	9	1
GAGA-0103.Scaffold3.156889-197498	GAGA-0103	Myrmecina graminicola	Myrmicinae	PacBio	probable_autolytic_lysozyme	Wolbachia	Rickettsiales	Alphaproteobacteria	Scaffold3	156889	197498	Scaffold3:176889-177498	176889	177498	CP003883.1;614753;615360;5.736E-120;440;611;76.300;Wolbachia endosymbiont of Drosophila simulans wNo	1602	0.36453202	19	19	1
GAGA-0103.Scaffold322.12631-53320	GAGA-0103	Myrmecina graminicola	Myrmicinae	PacBio	NA	NA	NA	NA	Scaffold322	12631	53320	Scaffold322:32631-33320	32631	33320	CP003884.1;326051;326775;7.214E-207;728;725;82.000;Wolbachia endosymbiont of Drosophila simulans wHa	1787	0.316400581	24	26	1
GAGA-0103.Scaffold44.400889-441446	GAGA-0103	Myrmecina graminicola	Myrmicinae	PacBio	NA	NA	NA	NA	Scaffold44	400889	441446	Scaffold44:420889-421446	420889	421446	CP003884.1;326120;326678;6.329E-167;595;559;83.700;Wolbachia endosymbiont of Drosophila simulans wHa	1127	0.317773788	127	120	1
GAGA-0103.Scaffold50.133194-173569	GAGA-0103	Myrmecina graminicola	Myrmicinae	PacBio	NA	NA	NA	NA	Scaffold50	133194	173569	Scaffold50:153194-153569	153194	153569	CP003884.1;326121;326428;8.930E-87;329;308;83.700;Wolbachia endosymbiont of Drosophila simulans wHa	267	0.32	NA	NA	1
GAGA-0103.Scaffold672.0-38461	GAGA-0103	Myrmecina graminicola	Myrmicinae	PacBio	NA	NA	NA	NA	Scaffold672	0	38461	Scaffold672:17556-18461	17556	18461	AE017321.1;488367;489127;5.270E-168;599;767;78.300;Wolbachia endosymbiont strain TRS of Brugia malayi	2878	0.316022099	15	16	1
GAGA-0103.Scaffold72.399973-440980	GAGA-0103	Myrmecina graminicola	Myrmicinae	PacBio	NA	Wolbachia	Rickettsiales	Alphaproteobacteria	Scaffold72	399973	440980	Scaffold72:419973-420980	419973	420980	CP003884.1;327932;328314;5.168E-56;227;383;73.700;Wolbachia endosymbiont of Drosophila simulans wHa	963	0.342601787	33	33	1
GAGA-0103.Scaffold795.4017-33634	GAGA-0103	Myrmecina graminicola	Myrmicinae	PacBio	NA	NA	NA	NA	Scaffold795	4017	33634	Scaffold795:24017-24931	24017	24931	AM999887.1;286812;287632;1.594E-127;465;821;73.100;Wolbachia endosymbiont of Culex quinquefasciatus Pel	1243	0.359956236	NA	NA	1
GAGA-0103.Scaffold84.0-33569	GAGA-0103	Myrmecina graminicola	Myrmicinae	PacBio	NA	NA	NA	NA	Scaffold84	0	33569	Scaffold84:12711-13569	12711	13569	AE017321.1;488367;489128;3.928E-173;616;767;78.700;Wolbachia endosymbiont strain TRS of Brugia malayi	2507	0.326340326	34	37	1
GAGA-0103.Scaffold88.542040-582649	GAGA-0103	Myrmecina graminicola	Myrmicinae	PacBio	NA	Wolbachia	Rickettsiales	Alphaproteobacteria	Scaffold88	542040	582649	Scaffold88:562040-562649	562040	562649	CP003884.1;326120;326432;8.000E-91;343;313;84.300;Wolbachia endosymbiont of Drosophila simulans wHa	411	0.318555008	NA	NA	1
GAGA-0103.Scaffold592.0-57299	GAGA-0103	Myrmecina graminicola	Myrmicinae	PacBio	NA	NA	NA	NA	Scaffold592	0	57299	Scaffold592:12989-14023;Scaffold592:14716-14885;Scaffold592:16624-16742;Scaffold592:17411-20053;Scaffold592:23695-25124;Scaffold592:25434-26175;Scaffold592:26386-26519;Scaffold592:29708-30220;Scaffold592:3510-4217;Scaffold592:35347-35900;Scaffold592:38288-38568;Scaffold592:833-1769	12989;14716;16624;17411;23695;25434;26386;29708;3510;35347;38288;833	14023;14885;16742;20053;25124;26175;26519;30220;4217;35900;38568;1769	CP007520.1;774344;775010;2.671E-12;82;668;61.700;Mycoplasma yeatsii GM274B;CP007520.1;773141;773311;1.241E-23;120;171;75.400;Mycoplasma yeatsii GM274B;CP000123.1;791411;791530;5.969E-11;78;120;74.100;Mycoplasma capricolum subsp. capricolum ATCC 27343;BX293980.2;813349;814378;4.843E-199;702;1030;75.600;Mycoplasma mycoides subsp. mycoides SC str. PG1;CP005076.1;600628;601196;1.790E-38;169;569;66.90…	194;121;158;37855;1037;2215;87;157;400;378;255;12122	0.322050290135397;0.313609467455621;0.228813559322034;0.353141559424678;0.361091672498251;0.364372469635628;0.330827067669173;0.3203125;0.342291371994342;0.334538878842676;0.335714285714286;0.387820512820513	NA;585;635;504;109;963;0;39	NA;598;546;481;107;919;0;97	12
GAGA-0103.Scaffold19.2469211-2509330	GAGA-0103	Myrmecina graminicola	Myrmicinae	PacBio	NA	NA	NA	NA	Scaffold19	2469211	2509330	Scaffold19:2489211-2489330	2489211	2489330	CP003884.1;326391;326496;4.979E-29;138;106;88.600;Wolbachia endosymbiont of Drosophila simulans wHa	310	0.403361345	NA	NA	1
GAGA-0103.Scaffold522.605-40907	GAGA-0103	Myrmecina graminicola	Myrmicinae	PacBio	NA	NA	NA	NA	Scaffold522	605	40907	Scaffold522:20605-20907	20605	20907	AE017321.1;488373;488683;2.676E-63;251;311;77.800;Wolbachia endosymbiont strain TRS of Brugia malayi	207	0.281456954	NA	NA	1
GAGA-0103.Scaffold7.2534119-2574492	GAGA-0103	Myrmecina graminicola	Myrmicinae	PacBio	NA	Wolbachia	Rickettsiales	Alphaproteobacteria	Scaffold7	2534119	2574492	Scaffold7:2554119-2554492	2554119	2554492	CP001391.1;734697;735073;1.073E-34;156;377;70.100;Wolbachia sp. wRi	522	0.289544236	NA	NA	1
GAGA-0103.Scaffold613.0-38284	GAGA-0103	Myrmecina graminicola	Myrmicinae	PacBio	NA	NA	NA	NA	Scaffold613	0	38284	Scaffold613:13104-15194;Scaffold613:1509-1973;Scaffold613:17960-18284;Scaffold613:18-677;Scaffold613:2143-2329;Scaffold613:2599-3068;Scaffold613:7885-8381;Scaffold613:8533-10703	13104;1509;17960;18;2143;2599;7885;8533	15194;1973;18284;677;2329;3068;8381;10703	CP001668.1;341224;342111;1.486E-107;398;888;70.400;Mycoplasma mycoides subsp. capri str. GM12;BX293980.2;242369;242661;1.602E-25;126;293;69.800;Mycoplasma mycoides subsp. mycoides SC str. PG1;CP006934.1;549499;549768;5.559E-42;181;276;75.200;Spiroplasma sabaudiense Ar-1343;CP007520.1;483072;483729;1.072E-85;326;661;71.400;Mycoplasma yeatsii GM274B;CP000123.1;225244;225415;3.451E-14;88;172;71.800;…	21348;3366;3329;2305;169;693;509;8486	0.351196172248804;0.299568965517241;0.274691358024691;0.396054628224583;0.311827956989247;0.304904051172708;0.346774193548387;0.382488479262673	NA;859;130;251	NA;873;129;250	8
GAGA-0103.Scaffold572.0-45142	GAGA-0103	Myrmecina graminicola	Myrmicinae	PacBio	NA	NA	NA	NA	Scaffold572	0	45142	Scaffold572:13741-15443;Scaffold572:15632-16156;Scaffold572:19044-19642;Scaffold572:19758-20377;Scaffold572:21163-21868;Scaffold572:24672-25142;Scaffold572:4959-5090;Scaffold572:8736-10976	13741;15632;19044;19758;21163;24672;4959;8736	15443;16156;19642;20377;21868;25142;5090;10976	CP011856.1;56845;57092;1.854E-14;89;248;68.900;Spiroplasma eriocheiris;CP003021.1;150461;150985;1.335E-26;130;526;66.200;Mycoplasma putrefaciens KS1;CP006681.1;744979;745578;2.072E-44;189;600;67.300;Spiroplasma culicicola AES-1;CP006681.1;750267;750898;4.000E-37;165;632;66.400;Spiroplasma culicicola AES-1;CP012622.1;720593;721290;1.664E-35;159;707;64.200;Spiroplasma cantharicola;CP000387.1;115043…	2325;152;340;298;348;464;83;5398	0.289659224441833;0.251908396946565;0.346153846153846;0.260096930533118;0.25531914893617;0.263829787234043;0.274809160305344;0.316071428571429	NA;37;23	NA;36;19	8
GAGA-0103.Scaffold421.0-97916	GAGA-0103	Myrmecina graminicola	Myrmicinae	PacBio	NA	NA	NA	NA	Scaffold421	0	97916	Scaffold421:13997-14099;Scaffold421:16190-16547;Scaffold421:28005-28326;Scaffold421:37585-40829;Scaffold421:42881-43633;Scaffold421:59511-59962;Scaffold421:62579-62804;Scaffold421:63999-64140;Scaffold421:65338-65760;Scaffold421:72091-73019;Scaffold421:79292-79378;Scaffold421:81657-81907	13997;16190;28005;37585;42881;59511;62579;63999;65338;72091;79292;81657	14099;16547;28326;40829;43633;59962;62804;64140;65760;73019;79378;81907	CP003723.1;592086;592153;3.849E-10;75;68;85.200;Fusobacterium nucleatum subsp. animalis 4_8;CP000123.1;362454;362811;3.582E-24;122;359;68.900;Mycoplasma capricolum subsp. capricolum ATCC 27343;CP005077.1;633596;633900;4.142E-13;85;323;66.800;Spiroplasma chrysopicola DF-1;CP006932.1;584250;584666;2.398E-67;265;417;74.100;Candidatus Hepatoplasma crinochetorum Av;CP012622.1;825719;826419;5.560E-59;2…	153;262;86;2024;898;247;89;92;123;14042;71;165	0.264705882352941;0.324929971988796;0.333333333333333;0.291307028360049;0.291223404255319;0.301552106430155;0.293333333333333;0.312056737588652;0.265402843601896;0.377155172413793;0.337209302325581;0.312	NA;568;422;317;197;28;73;332	NA;566;355;338;201;43;69;319	12
GAGA-0103.Scaffold595.0-39480	GAGA-0103	Myrmecina graminicola	Myrmicinae	PacBio	NA	NA	NA	NA	Scaffold595	0	39480	Scaffold595:18575-19480;Scaffold595:6736-7104;Scaffold595:8118-8409	18575;6736;8118	19480;7104;8409	AE017321.1;488367;489128;1.981E-136;494;762;74.800;Wolbachia endosymbiont strain TRS of Brugia malayi;CP003884.1;326121;326496;7.152E-112;413;376;84.300;Wolbachia endosymbiont of Drosophila simulans wHa;CP003884.1;280281;280572;7.719E-81;310;292;83.500;Wolbachia endosymbiont of Drosophila simulans wHa	2324;142;687	0.32817679558011;0.315217391304348;0.347079037800687	NA	NA	3
GAGA-0103.Scaffold146.178178-239512	GAGA-0103	Myrmecina graminicola	Myrmicinae	PacBio	NA	NA	NA	NA	Scaffold146	178178	239512	Scaffold146:198178-198553;Scaffold146:199307-199597;Scaffold146:218414-219512	198178;199307;218414	198553;199597;219512	CP003884.1;280011;280333;7.719E-81;310;324;81.400;Wolbachia endosymbiont of Drosophila simulans wHa;AP013028.1;823712;824003;4.802E-70;274;292;80.800;Wolbachia endosymbiont of Cimex lectularius;AP013028.1;497448;498399;5.493E-239;835;956;79.900;Wolbachia endosymbiont of Cimex lectularius	289;459;2623	0.314666666666667;0.358620689655172;0.325136612021858	NA;30	NA;28	3
GAGA-0103.Scaffold3.2167494-2213081	GAGA-0103	Myrmecina graminicola	Myrmicinae	PacBio	Transposase_for_insertion_sequence_element_ISRM3	Wolbachia	Rickettsiales	Alphaproteobacteria	Scaffold3	2167494	2213081	Scaffold3:2187494-2188275;Scaffold3:2188587-2189599;Scaffold3:2189893-2191095;Scaffold3:2193001-2193081	2187494;2188587;2189893;2193001	2188275;2189599;2191095;2193081	AM999887.1;1319707;1320000;3.213E-62;248;294;78.600;Wolbachia endosymbiont of Culex quinquefasciatus Pel;AM999887.1;942278;942342;5.351E-15;91;65;90.700;Wolbachia endosymbiont of Culex quinquefasciatus Pel;CP003883.1;582186;582707;3.081E-120;440;540;78.200;Wolbachia endosymbiont of Drosophila simulans wNo;CP001391.1;741355;741435;2.671E-12;82;82;82.900;Wolbachia sp. wRi	3026;4312;1715;83	0.332906530089629;0.288537549407115;0.296173044925125;0.3125	NA	NA	4
GAGA-0103.Scaffold410.3485-72202	GAGA-0103	Myrmecina graminicola	Myrmicinae	PacBio	NA	NA	NA	NA	Scaffold410	3485	72202	Scaffold410:23485-24786;Scaffold410:28946-29432;Scaffold410:29705-30485;Scaffold410:32367-32508;Scaffold410:35274-37146;Scaffold410:38538-39438;Scaffold410:39954-40426;Scaffold410:40568-41756;Scaffold410:42963-43413;Scaffold410:44378-44612;Scaffold410:45023-46266;Scaffold410:46505-47130;Scaffold410:48337-50863;Scaffold410:52118-52202	23485;28946;29705;32367;35274;38538;39954;40568;42963;44378;45023;46505;48337;52118	24786;29432;30485;32508;37146;39438;40426;41756;43413;44612;46266;47130;50863;52202	CP000123.1;40366;41352;3.313E-123;450;989;70.700;Mycoplasma capricolum subsp. capricolum ATCC 27343;CP001837.1;1927977;1928388;3.207E-11;79;412;65.000;Staphylococcus lugdunensis HKU09-01;AP012053.1;1782987;1783750;3.457E-65;258;782;68.200;Streptococcus gallolyticus subsp. gallolyticus ATCC 43143;CP012357.1;469608;469750;5.351E-15;91;143;75.000;Spiroplasma litorale;AM422018.1;643498;643807;4.979E-…	6041;378;429;92;35426;629;237;3001;206;80;4113;19512;143	0.349730976172175;0.38477366255144;0.369230769230769;0.319148936170213;0.364850427350427;0.363333333333333;0.338983050847458;0.406565656565657;0.273333333333333;0.290598290598291;0.388576025744167;0.2992;0.338875692794933;0.261904761904762	0;NA;578;1168	161;NA;623;23	14
GAGA-0103.Scaffold7.2528378-2575114	GAGA-0103	Myrmecina graminicola	Myrmicinae	PacBio	NA	NA	NA	NA	Scaffold7	2528378	2575114	Scaffold7:2548378-2548523;Scaffold7:2550777-2552662;Scaffold7:2554656-2555114	2548378;2550777;2554656	2548523;2552662;2555114	CP003883.1;1194255;1194398;1.112E-27;133;147;80.900;Wolbachia endosymbiont of Drosophila simulans wNo;AM999887.1;305468;306668;4.223E-298;1031;1225;78.900;Wolbachia endosymbiont of Culex quinquefasciatus Pel;CP003883.1;562688;563014;3.857E-61;244;343;75.700;Wolbachia endosymbiont of Drosophila simulans wNo	134;458;3027	0.303448275862069;0.306631299734748;0.314410480349345	39;NA;32	38;NA;32	3
GAGA-0103.Scaffold21.2707980-2751770	GAGA-0103	Myrmecina graminicola	Myrmicinae	PacBio	Ribosomal_RNA_large_subunit_methyltransferase	Wolbachia	Rickettsiales	Alphaproteobacteria	Scaffold21	2707980	2751770	Scaffold21:2727980-2728205;Scaffold21:2730118-2730402;Scaffold21:2730533-2730874;Scaffold21:2731647-2731770	2727980;2730118;2730533;2731647	2728205;2730402;2730874;2731770	CP003884.1;966497;966575;3.714E-17;98;79;87.300;Wolbachia endosymbiont of Drosophila simulans wHa;CP001391.1;993676;993961;1.602E-93;352;286;87.800;Wolbachia sp. wRi;CP001391.1;729250;729592;6.673E-41;177;343;71.400;Wolbachia sp. wRi;AE017321.1;754494;754622;2.773E-22;115;129;79.000;Wolbachia endosymbiont strain TRS of Brugia malayi	690;1766;178;1132	0.364444444444444;0.352112676056338;0.32258064516129;0.32520325203252	NA;27	NA;27	4
GAGA-0103.Scaffold479.9426-70878	GAGA-0103	Myrmecina graminicola	Myrmicinae	PacBio	Putative_type_I_restriction_enzyme_HindVIIP_M_protein	Spiroplasma_sp.;Mesoplasma	Entoplasmatales	Mollicutes	Scaffold479	9426	70878	Scaffold479:29426-30466;Scaffold479:30854-31490;Scaffold479:33993-34568;Scaffold479:36724-37303;Scaffold479:37776-38031;Scaffold479:38173-40999;Scaffold479:41378-41789;Scaffold479:45109-45626;Scaffold479:49024-49202;Scaffold479:50636-50878	29426;30854;33993;36724;37776;38173;41378;45109;49024;50636	30466;31490;34568;37303;38031;40999;41789;45626;49202;50878	CP006934.1;472635;473487;1.336E-77;299;856;68.400;Spiroplasma sabaudiense Ar-1343;CP006934.1;474748;475385;4.465E-50;208;638;67.800;Spiroplasma sabaudiense Ar-1343;AP012027.1;1405317;1405515;2.671E-12;82;199;69.300;Erysipelothrix rhusiopathiae str. Fujisawa;CP005074.1;72143;72273;1.385E-19;106;131;77.800;Spiroplasma taiwanense CT-1;CP005074.1;71236;71489;5.981E-45;191;257;77.100;Spiroplasma taiwa…	592;153;350;521;192;4063;188;2048;106;83	0.273076923076923;0.224842767295597;0.274782608695652;0.359240069084629;0.270588235294118;0.283085633404105;0.24330900243309;0.237911025145068;0.353932584269663;0.318181818181818	NA;23;19	NA;24;19	10
GAGA-0103.Scaffold493.11605-76125	GAGA-0103	Myrmecina graminicola	Myrmicinae	PacBio	NA	NA	NA	NA	Scaffold493	11605	76125	Scaffold493:31605-31924;Scaffold493:35052-35325;Scaffold493:38403-39733;Scaffold493:41384-43418;Scaffold493:45975-46366;Scaffold493:46897-47356;Scaffold493:52120-52206;Scaffold493:56060-56125	31605;35052;38403;41384;45975;46897;52120;56060	31924;35325;39733;43418;46366;47356;52206;56125	CP003021.1;344065;344399;1.288E-33;153;335;70.500;Mycoplasma putrefaciens KS1;AP012046.1;2086230;2086506;1.435E-12;83;277;66.700;Tetragenococcus halophilus NBRC 12172;BX293980.2;253877;254958;3.831E-129;470;1099;70.500;Mycoplasma mycoides subsp. mycoides SC str. PG1;CP012622.1;616735;617055;5.162E-22;114;322;68.700;Spiroplasma cantharicola;CP006681.1;301466;301721;9.608E-22;113;256;70.100;Spiropl…	894;84;14128;6107;1419;198;71;76	0.288401253918495;0.355311355311355;0.330827067669173;0.395771878072763;0.304347826086957;0.276688453159041;0.348837209302326;0.307692307692308	365;NA;470;777;0	331;NA;717;834;0	8
GAGA-0103.Scaffold3.3238538-3285007	GAGA-0103	Myrmecina graminicola	Myrmicinae	PacBio	Transposase_for_insertion_sequence_element_ISRM3	Wolbachia	Rickettsiales	Alphaproteobacteria	Scaffold3	3238538	3285007	Scaffold3:3258538-3259641;Scaffold3:3259952-3261488;Scaffold3:3261650-3263352;Scaffold3:3264153-3265007	3258538;3259952;3261650;3264153	3259641;3261488;3263352;3265007	AM999887.1;1319704;1320000;4.982E-63;251;297;78.400;Wolbachia endosymbiont of Culex quinquefasciatus Pel;AM999887.1;942278;942343;6.912E-17;97;66;92.400;Wolbachia endosymbiont of Culex quinquefasciatus Pel;CP001391.1;739574;739998;3.688E-136;493;425;85.900;Wolbachia sp. wRi;CP001391.1;740001;740856;0.000E+00;1302;856;93.900;Wolbachia sp. wRi	7207;618;1673;189	0.350861287398005;0.299479166666667;0.344300822561692;0.350117096018735	NA;19	NA;19	4
GAGA-0103.Scaffold150.319013-360421	GAGA-0103	Myrmecina graminicola	Myrmicinae	PacBio	NA	NA	NA	NA	Scaffold150	319013	360421	Scaffold150:339013-339386;Scaffold150:340134-340421	339013;340134	339386;340421	CP003884.1;280011;280382;2.143E-105;391;372;83.600;Wolbachia endosymbiont of Drosophila simulans wHa;CP003884.1;656730;657017;1.285E-101;379;288;89.200;Wolbachia endosymbiont of Drosophila simulans wHa	338;380	0.32171581769437;0.348432055749129	NA;29	NA;33	2
GAGA-0103.Scaffold649.20811-49358	GAGA-0103	Myrmecina graminicola	Myrmicinae	PacBio	NA	NA	NA	NA	Scaffold649	20811	49358	Scaffold649:40811-41495;Scaffold649:41964-42187;Scaffold649:42585-43251;Scaffold649:45139-45608;Scaffold649:47681-48088;Scaffold649:48254-48639;Scaffold649:48836-49005	40811;41964;42585;45139;47681;48254;48836	41495;42187;43251;45608;48088;48639;49005	CP004357.1;236914;237495;1.857E-65;259;588;69.800;Mycoplasma putrefaciens Mput9231;CP012357.1;959771;959995;8.601E-09;70;225;67.500;Spiroplasma litorale;CP006681.1;316394;317032;8.011E-40;174;639;66.200;Spiroplasma culicicola AES-1;CP006682.1;253848;254268;3.211E-28;135;424;67.700;Spiroplasma apis B31;CP007520.1;180322;180706;8.004E-23;117;409;67.700;Mycoplasma yeatsii GM274B;CP000123.1;349190;34…	2078;71;2872;224;197;252;72	0.340643274853801;0.354260089686099;0.336336336336336;0.270788912579957;0.346437346437346;0.324675324675325;0.313609467455621	858;NA;958;325	908;NA;954;364	7
GAGA-0103.Scaffold615.25759-53729	GAGA-0103	Myrmecina graminicola	Myrmicinae	PacBio	NA	NA	NA	NA	Scaffold615	25759	53729	Scaffold615:45759-46133;Scaffold615:46880-47170	45759;46880	46133;47170	CP003884.1;280011;280382;7.985E-108;399;372;83.800;Wolbachia endosymbiont of Drosophila simulans wHa;CP003884.1;326391;326678;2.228E-81;311;288;84.000;Wolbachia endosymbiont of Drosophila simulans wHa	195;619	0.320855614973262;0.355172413793103	NA;10	NA;10	2
GAGA-0103.Scaffold123.462342-506480	GAGA-0103	Myrmecina graminicola	Myrmicinae	PacBio	NA	NA	NA	NA	Scaffold123	462342	506480	Scaffold123:482342-484281;Scaffold123:485330-486480	482342;485330	484281;486480	AE006470.1;863720;864877;2.041E-163;584;1160;71.500;Chlorobaculum tepidum TLS;AE006470.1;860170;860853;3.097E-69;271;684;68.800;Chlorobaculum tepidum TLS	27696;1221	0.571428571428571;0.549565217391304	11	11;0	2
GAGA-0103.Scaffold1376.0-9092	GAGA-0103	Myrmecina graminicola	Myrmicinae	PacBio	NA	NA	NA	NA	Scaffold1376	0	9092	Scaffold1376:5741-6374;Scaffold1376:7053-7187;Scaffold1376:3043-3178	5741;7053;3043	6374;7187;3178	CP001562.1;982799;983325;4.463E-33;151;527;67.400;Bartonella grahamii as4aup;AM260525.1;1159576;1159711;9.960E-15;90;136;74.800;Bartonella tribocorum CIP 105476;AGWA01000019.1;96178;96314;4.458E-16;95;137;75.100;Bartonella bovis 91-4	1482;169;1032	0.472353870458136;0.373134328358209;0.466666666666667	25;NA	25;NA	3
GAGA-0103.Scaffold101.569579-621079	GAGA-0103	Myrmecina graminicola	Myrmicinae	PacBio	NA	NA	NA	NA	Scaffold101	569579	621079	Scaffold101:589579-590224;Scaffold101:590783-591230;Scaffold101:591377-591538;Scaffold101:591751-592013;Scaffold101:595668-598336;Scaffold101:598567-599356;Scaffold101:600559-601079	589579;590783;591377;591751;595668;598567;600559	590224;591230;591538;592013;598336;599356;601079	CP004357.1;806663;806957;8.298E-16;94;295;67.600;Mycoplasma putrefaciens Mput9231;CP001668.1;44028;44447;5.360E-49;204;420;70.800;Mycoplasma mycoides subsp. capri str. GM12;FP929048.1;1994322;1994481;8.298E-16;94;163;73.700;Megamonas hypermegale ART12/1;CP005074.1;526301;526564;4.458E-16;95;264;68.600;Spiroplasma taiwanense CT-1;CP007520.1;90713;91029;1.242E-40;176;317;72.600;Mycoplasma yeatsii G…	4491;1055;95;188;25644;14736;83	0.31937984496124;0.310961968680089;0.360248447204969;0.316793893129771;0.369940029985008;0.357414448669202;0.367307692307692	NA	NA	7
GAGA-0103.Scaffold100.603218-644196	GAGA-0103	Myrmecina graminicola	Myrmicinae	PacBio	NA	NA	NA	NA	Scaffold100	603218	644196	Scaffold100:623218-623524;Scaffold100:623651-624196	623218;623651	623524;624196	CP005078.1;577049;577353;5.977E-28;134;308;70.200;Spiroplasma syrphidicola EA-1;CP006681.1;1024008;1024550;3.457E-48;201;547;68.300;Spiroplasma culicicola AES-1	135;306	0.251633986928105;0.322935779816514	NA	NA	2
GAGA-0103.Scaffold94.751109-802694	GAGA-0103	Myrmecina graminicola	Myrmicinae	PacBio	NA	NA	NA	NA	Scaffold94	751109	802694	Scaffold94:771109-772538;Scaffold94:772848-773589;Scaffold94:773800-773933;Scaffold94:782070-782694	771109;772848;773800;782070	772538;773589;773933;782694	CP005076.1;600801;601196;4.148E-30;141;396;68.100;Spiroplasma diminutum CUAS-1;CP005078.1;796047;796413;1.725E-28;136;367;70.000;Spiroplasma syrphidicola EA-1;CP005074.1;612145;612279;2.226E-13;86;135;75.000;Spiroplasma taiwanense CT-1;AE017263.1;573055;573670;3.455E-31;145;626;67.200;Mesoplasma florum L1	986;1882;87;146	0.361091672498251;0.364372469635628;0.330827067669173;0.322115384615385	NA;59	NA;59	4
GAGA-0103.Scaffold312.57828-99170	GAGA-0103	Myrmecina graminicola	Myrmicinae	PacBio	NA	NA	NA	NA	Scaffold312	57828	99170	Scaffold312:77828-78203;Scaffold312:78880-79170	77828;78880	78203;79170	CP003884.1;326121;326496;1.988E-119;438;376;85.900;Wolbachia endosymbiont of Drosophila simulans wHa;CP003884.1;280281;280572;7.719E-81;310;292;83.500;Wolbachia endosymbiont of Drosophila simulans wHa	152;501	0.322666666666667;0.362068965517241	NA;39	NA;39	2
GAGA-0103.Scaffold5.60024-102112	GAGA-0103	Myrmecina graminicola	Myrmicinae	PacBio	Mannose-1-phosphate_guanylyltransferase_2	Wolbachia	Rickettsiales	Alphaproteobacteria	Scaffold5	60024	102112	Scaffold5:80024-80416;Scaffold5:81128-82112	80024;81128	80416;82112	AP013028.1;361421;361812;3.200E-113;417;392;83.600;Wolbachia endosymbiont of Cimex lectularius;CP003883.1;220837;221210;5.069E-175;622;374;97.000;Wolbachia endosymbiont of Drosophila simulans wNo	2205;924	0.334183673469388;0.36280487804878	25;33	27;39	2
GAGA-0114.Scaffold132.0-53096	GAGA-0114	Manica rubida	Myrmicinae	Chromosome level	NA	NA	NA	NA	Scaffold132	0	53096	Scaffold132:10000-10157;Scaffold132:11030-12109;Scaffold132:12933-13505;Scaffold132:16340-16917;Scaffold132:17213-17707;Scaffold132:19191-19708;Scaffold132:20002-21107;Scaffold132:21903-24149;Scaffold132:2423-2652;Scaffold132:24944-26010;Scaffold132:26880-27037;Scaffold132:27210-27955;Scaffold132:2829-3029;Scaffold132:28523-28928;Scaffold132:29131-31968;Scaffold132:3214-3686;Scaffold132:32990-330…	10000;11030;12933;16340;17213;19191;20002;21903;2423;24944;26880;27210;2829;28523;29131;3214;32990;3910;5047;6671;9066	10157;12109;13505;16917;17707;19708;21107;24149;2652;26010;27037;27955;3029;28928;31968;3686;33096;4019;6559;8468;9814	CP003488.1;231467;231625;2.482E-09;72;159;71.100;Providencia stuartii MRSN 2154;AE016879.1;1917556;1917644;4.621E-09;71;89;77.500;Bacillus anthracis str. Ames;FN667741.1;1754462;1754816;4.304E-40;174;355;71.500;Xenorhabdus bovienii SS-2004;CP003488.1;1202436;1202956;2.880E-49;205;521;68.700;Providencia stuartii MRSN 2154;BX950851.1;3764787;3765024;4.458E-16;95;238;69.500;Pectobacterium atroseptic…	73;6242;5083;8745;856;1322;15318;23317;106;5873;1311;72;635;25726;207;153;93;17165;6066;1370	0.337579617834395;0.419833178869323;0.421328671328671;0.426343154246101;0.388663967611336;0.375241779497099;0.445248868778281;0.408726625111309;0.393013100436681;0.420262664165103;0.433557046979866;0.385;0.434567901234568;0.415932322876278;0.389830508474576;0.377358490566038;0.376146788990826;0.431216931216931;0.414023372287145;0.434491978609626	NA;2178;375;1513;404;420	NA;1975;386;1397;425;392	21
GAGA-0114.Scaffold10.11627649-11988651	GAGA-0114	Manica rubida	Myrmicinae	Chromosome level	NA	NA	NA	NA	Scaffold10	11627649	11988651	Scaffold10:11677660-11677937;Scaffold10:11678343-11678979;Scaffold10:11679713-11680762;Scaffold10:11681354-11684013;Scaffold10:11684128-11684267;Scaffold10:11684636-11685305;Scaffold10:11685698-11687801;Scaffold10:11688137-11688463;Scaffold10:11688957-11689360;Scaffold10:11690039-11690169;Scaffold10:11690435-11690654;Scaffold10:11691001-11691418;Scaffold10:11691541-11693742;Scaffold10:11694511-11…	11677660;11678343;11679713;11681354;11684128;11684636;11685698;11688137;11688957;11690039;11690435;11691001;11691541;11694511;11700239;11701055;11705105;11707790;11712183;11712591;11713715;11714257;11715191;11717198;11720193;11722304;11723053;11724937;11725277;11725983;11726212;11727935;11729065;11730373;11732356;11734061;11734998;11737163;11737822;11738966;11741075;11741916;11744169;11746005;117…	11677937;11678979;11680762;11684013;11684267;11685305;11687801;11688463;11689360;11690169;11690654;11691418;11693742;11700134;11700901;11704732;11707659;11709744;11712362;11713350;11714076;11715077;11715693;11717389;11720532;11722477;11724751;11725168;11725505;11726110;11727748;11728444;11729231;11731393;11733769;11734520;11735794;11737464;11738586;11740351;11741477;11743930;11745607;11746342;117…	CP000653.1;2589127;2589405;1.435E-12;83;279;67.700;Enterobacter sp. 638;CP002773.1;5278971;5279599;1.196E-13;87;637;64.100;Serratia plymuthica AS9;FM178379.1;2987558;2988062;8.613E-26;127;505;66.000;Aliivibrio salmonicida LFI1238;CP007445.1;1488042;1489189;8.781E-172;612;1148;72.200;Gilliamella apicola;AP014724.1;1743857;1743997;7.711E-13;84;141;73.000;Sulfurospirillum cavolei;CP003614.1;4840304;…	1820;1836;1687;27195;85;2712;23942;454;352;162;423;1741;38528;290770;6243;37342;19220;70728;328;6000;7230;7717;402;89;590;95;67664;273;347;8509;1551;555;73;125493;78475;4414;32210;1952;10268;223;70283;5575;234;7747;71562;3329;2709;24679;76;227;7079;7589;17002;71;4535;4821;7959;1670;1260;54621;2064;19133;4278;19877;103;6409;184456;2491;5931;2028;18035;3022;5878;29001;8351;12624;100174;312;1119;92;…	0.447653429602888;0.400943396226415;0.407054337464252;0.435125987213238;0.424460431654676;0.426008968609865;0.421302900618164;0.386503067484663;0.451612903225806;0.507692307692308;0.383561643835616;0.357314148681055;0.412539754656974;0.411346256446737;0.422960725075529;0.374490073429426;0.423649177760376;0.392528147389969;0.41340782122905;0.479578392621871;0.412742382271468;0.384146341463415;0.36…	NA;2515;2463;2429;2597;2492;2510;2557;2627;2644;2623;1989;1456;1373;876;2403;2164;6	NA;2469;2457;2465;2583;2448;2521;2501;2590;2627;2641;2633;1940;1424;1340;874;2387;2115;6	169
GAGA-0114.Scaffold14.327122-367678	GAGA-0114	Manica rubida	Myrmicinae	Chromosome level	NA	NA	NA	NA	Scaffold14	327122	367678	Scaffold14:347122-347678	347122	347678	AE017321.1;52057;52603;3.333E-55;225;558;70.800;Wolbachia endosymbiont strain TRS of Brugia malayi	585	0.314748201	3	3	1
GAGA-0114.Scaffold3.14375015-14434705	GAGA-0114	Manica rubida	Myrmicinae	Chromosome level	NA	Wolbachia	Rickettsiales	Alphaproteobacteria	Scaffold3	14375015	14434705	Scaffold3:14395015-14395198;Scaffold3:14395427-14396000;Scaffold3:14409573-14412174;Scaffold3:14414373-14414705	14395015;14395427;14409573;14414373	14395198;14396000;14412174;14414705	AP013028.1;823937;824121;5.559E-42;181;185;81.600;Wolbachia endosymbiont of Cimex lectularius;AP013028.1;89424;89931;2.985E-76;294;508;73.300;Wolbachia endosymbiont of Cimex lectularius;AM999887.1;304704;306085;6.009E-269;934;1418;75.200;Wolbachia endosymbiont of Culex quinquefasciatus Pel;AM999887.1;439455;439680;4.142E-13;85;226;69.100;Wolbachia endosymbiont of Culex quinquefasciatus Pel	89;908;841;387	0.360655737704918;0.307155322862129;0.291041906958862;0.370481927710843	NA;27;45	NA;33;45	4
GAGA-0114.Scaffold3.15751168-15799607	GAGA-0114	Manica rubida	Myrmicinae	Chromosome level	NA	NA	NA	NA	Scaffold3	15751168	15799607	Scaffold3:15771168-15772262;Scaffold3:15778928-15779607	15771168;15778928	15772262;15779607	AE017321.1;83970;84574;2.072E-61;245;626;68.700;Wolbachia endosymbiont strain TRS of Brugia malayi;AM999887.1;482564;483244;1.774E-140;508;681;76.700;Wolbachia endosymbiont of Culex quinquefasciatus Pel	11207;776	0.327239488117002;0.353460972017673	NA;14	NA;13	2
GAGA-0114.Scaffold18.381948-555291	GAGA-0114	Manica rubida	Myrmicinae	Chromosome level	NA	NA	NA	NA	Scaffold18	381948	555291	Scaffold18:401948-402074;Scaffold18:402818-405283;Scaffold18:406361-407918;Scaffold18:410424-410761;Scaffold18:411947-412186;Scaffold18:412490-412970;Scaffold18:413073-413889;Scaffold18:414171-414910;Scaffold18:415033-415569;Scaffold18:415954-416069;Scaffold18:416543-416822;Scaffold18:417034-417751;Scaffold18:420616-421126;Scaffold18:421734-423206;Scaffold18:426844-426958;Scaffold18:427125-427258…	401948;402818;406361;410424;411947;412490;413073;414171;415033;415954;416543;417034;420616;421734;426844;427125;427385;427836;428502;429139;430386;431819;432894;434512;435143;436019;437494;438141;440175;446067;448632;449668;453177;459642;462141;463394;465022;467338;469502;470338;471866;472589;474469;476266;477258;478608;480570;482893;485410;487679;489709;490554;491049;493414;495743;496738;501270;…	402074;405283;407918;410761;412186;412970;413889;414910;415569;416069;416822;417751;421126;423206;426958;427258;427681;428318;428922;429431;431615;432188;433183;434669;435792;436861;437984;438835;445725;448474;449534;451873;459393;460756;463261;463768;466201;468195;469790;471404;472170;472882;475365;476695;477706;480116;481417;484316;487137;488140;490388;490742;492765;494296;496411;501097;502086;…	CP002394.1;1901119;1901219;3.207E-11;79;101;78.400;Bacillus cellulosilyticus DSM 2522;CP007520.1;227891;228628;1.435E-12;83;738;63.800;Mycoplasma yeatsii GM274B;AE017263.1;182781;183118;1.723E-11;79;338;65.300;Mesoplasma florum L1;CP005078.1;785418;785639;1.072E-17;100;222;70.700;Spiroplasma syrphidicola EA-1;CP003021.1;720043;720270;2.068E-10;76;228;67.500;Mycoplasma putrefaciens KS1;CP007520.1;…	151;13453;5119;516;637;474;2060;5829;6132;155;373;2302;248;10785;367;76;1098;3460;524;755;2112;707;1236;86;680;1662;936;3355;156995;52035;2743;44350;247444;5080;7409;253;16869;1771;188;3368;7568;1872;1209;44842;11334;17564;1778;214;7681;172;1888;189;126688;1022;9725;6102;142;31299;4763;2273;14939;7816;1407;21902;1788;78;908;24635;3652;15789;6854;1228;4179;1020;278;468	0.301587301587302;0.326166328600406;0.34553628773282;0.28486646884273;0.359832635983264;0.285416666666667;0.287990196078431;0.342354533152909;0.365671641791045;0.226086956521739;0.301075268817204;0.365411436541144;0.329411764705882;0.351902173913043;0.333333333333333;0.383458646616541;0.375;0.381742738589212;0.354761904761905;0.410958904109589;0.310821806346623;0.330623306233062;0.290657439446367…	NA;9;17;3;4;6;5;0	NA;9;17;3;4;6;5;0	79
GAGA-0114.Scaffold14.407045-467697	GAGA-0114	Manica rubida	Myrmicinae	Chromosome level	Protein_ApaG;N5-carboxyaminoimidazole_ribonucleotide_synthase	Wolbachia	Rickettsiales	Alphaproteobacteria	Scaffold14	407045	467697	Scaffold14:427045-427585;Scaffold14:445809-446147;Scaffold14:446303-447068;Scaffold14:447232-447697	427045;445809;446303;447232	427585;446147;447068;447697	HE660029.1;294480;295004;8.863E-138;499;525;81.300;Wolbachia endosymbiont of Onchocerca ochengi;AP013028.1;844199;844385;1.664E-52;216;192;84.800;Wolbachia endosymbiont of Cimex lectularius;AP013028.1;843306;844060;1.228E-237;830;755;84.600;Wolbachia endosymbiont of Cimex lectularius;AP013028.1;1115569;1115746;2.312E-40;175;179;82.100;Wolbachia endosymbiont of Cimex lectularius	2918;2645;1844;8431	0.344444444444444;0.328402366863905;0.33202614379085;0.359139784946237	27;NA	27;NA	4
GAGA-0114.Scaffold12.447548-557930	GAGA-0114	Manica rubida	Myrmicinae	Chromosome level	NA	NA	NA	NA	Scaffold12	447548	557930	Scaffold12:535580-537149;Scaffold12:537661-537930	535580;537661	537149;537930	CP009056.1;136070;137590;0.000E+00;1446;1534;83.600;Frischella perrara;BA000037.2;1356152;1356418;2.068E-10;76;271;68.600;Vibrio vulnificus YJ016	105329;244	0.511790949649458;0.449814126394052	NA	NA	2
GAGA-0114.Scaffold960.0-10194	GAGA-0114	Manica rubida	Myrmicinae	Chromosome level	NA	NA	NA	NA	Scaffold960	0	10194	Scaffold960:5486-6533;Scaffold960:9679-9770	5486;9679	6533;9770	CP009056.1;2586404;2586946;8.307E-33;150;553;66.600;Frischella perrara;CP002648.1;417887;417976;1.453E-09;72;93;79.500;Buchnera aphidicola str. Ua (Uroleucon ambrosiae)	856;73	0.405921680993314;0.340659340659341	NA	NA	2
GAGA-0114.Scaffold15.8915522-8960716	GAGA-0114	Manica rubida	Myrmicinae	Chromosome level	phosphocholine_transferase_AnkX	Wolbachia	Rickettsiales	Alphaproteobacteria	Scaffold15	8915522	8960716	Scaffold15:8935522-8935721;Scaffold15:8936253-8936594;Scaffold15:8936857-8937236;Scaffold15:8938800-8940716	8935522;8936253;8936857;8938800	8935721;8936594;8937236;8940716	AE017321.1;151721;151929;8.620E-60;240;209;85.100;Wolbachia endosymbiont strain TRS of Brugia malayi;AP013028.1;127319;127666;1.072E-85;326;348;80.300;Wolbachia endosymbiont of Cimex lectularius;CP001391.1;750016;750367;1.288E-67;266;381;73.900;Wolbachia sp. wRi;CP001391.1;751394;751595;1.437E-29;139;202;75.200;Wolbachia sp. wRi	782;662;166;4307	0.301507537688442;0.32258064516129;0.258575197889182;0.342379958246347	39;NA;32	39;NA;46	4
GAGA-0177.Scaffold10.12014628-12055035	GAGA-0177	Lasius niger	Formicinae	Chromosome level	Ribonuclease_3	Wolbachia	Rickettsiales	Alphaproteobacteria	Scaffold10	12014628	12055035	Scaffold10:12034628-12035035	12034628	12035035	AP013028.1;379582;379996;2.312E-40;175;415;70.000;Wolbachia endosymbiont of Cimex lectularius	176	0.351351351	51	51	1
GAGA-0177.Scaffold3.15844830-15885044	GAGA-0177	Lasius niger	Formicinae	Chromosome level	NA	Wolbachia	Rickettsiales	Alphaproteobacteria	Scaffold3	15844830	15885044	Scaffold3:15864830-15865044	15864830	15865044	CP003884.1;841434;841648;6.673E-41;177;215;78.100;Wolbachia endosymbiont of Drosophila simulans wHa	356	0.280373832	14	14	1
GAGA-0177.Scaffold8.15273263-15313658	GAGA-0177	Lasius niger	Formicinae	Chromosome level	NA	NA	NA	NA	Scaffold8	15273263	15313658	Scaffold8:15293263-15293658	15293263	15293658	AE017321.1;125191;125593;7.180E-44;187;403;70.200;Wolbachia endosymbiont strain TRS of Brugia malayi	188	0.283544304	15	14	1
GAGA-0177.Scaffold9.3565016-3605344	GAGA-0177	Lasius niger	Formicinae	Chromosome level	ankyrin_repeat_protein	Wolbachia	Rickettsiales	Alphaproteobacteria	Scaffold9	3565016	3605344	Scaffold9:3585016-3585344	3585016	3585344	CP001391.1;740703;741032;2.676E-63;251;330;77.300;Wolbachia sp. wRi	504	0.350609756	50	49	1
GAGA-0177.Scaffold8.15412489-15473591	GAGA-0177	Lasius niger	Formicinae	Chromosome level	ankyrin_repeat_protein	Wolbachia	Rickettsiales	Alphaproteobacteria	Scaffold8	15412489	15473591	Scaffold8:15432489-15432905;Scaffold8:15433501-15434225;Scaffold8:15436712-15437193	15432489;15433501;15436712	15432905;15434225;15437193	CP001391.1;737824;738241;1.072E-85;326;418;77.700;Wolbachia sp. wRi;CP001391.1;739800;740000;4.804E-53;217;201;84.600;Wolbachia sp. wRi;CP001391.1;740953;741441;5.916E-147;529;489;84.200;Wolbachia sp. wRi	327;691;287	0.283653846153846;0.346685082872928;0.322245322245322	171;177;122	172;176;110	3
GAGA-0177.Scaffold2.1544354-1624273	GAGA-0177	Lasius niger	Formicinae	Chromosome level	ankyrin_repeat_protein;ankyrin_homolog	Wolbachia	Rickettsiales	Alphaproteobacteria	Scaffold2	1544354	1624273	Scaffold2:1564354-1565280;Scaffold2:1600838-1601520;Scaffold2:1602018-1602359;Scaffold2:1603792-1604273	1564354;1600838;1602018;1603792	1565280;1601520;1602359;1604273	CP001391.1;737736;738231;2.577E-87;331;496;74.700;Wolbachia sp. wRi;CP001391.1;740774;740937;1.073E-34;156;164;81.000;Wolbachia sp. wRi;CP001391.1;740691;741033;5.765E-69;270;343;77.900;Wolbachia sp. wRi;CP001391.1;740947;741441;3.190E-130;474;495;81.200;Wolbachia sp. wRi	818;465;271;283	0.327213822894168;0.363636363636364;0.348973607038123;0.311850311850312	22;NA;56	22;NA;51	4
GAGA-0177.Scaffold2.2060594-2103787	GAGA-0177	Lasius niger	Formicinae	Chromosome level	ankyrin_repeat_protein	Wolbachia	Rickettsiales	Alphaproteobacteria	Scaffold2	2060594	2103787	Scaffold2:2080594-2080938;Scaffold2:2081857-2082325;Scaffold2:2082703-2083257;Scaffold2:2083393-2083787	2080594;2081857;2082703;2083393	2080938;2082325;2083257;2083787	CP001391.1;740691;741033;1.154E-71;279;346;78.000;Wolbachia sp. wRi;CP001391.1;740576;741033;1.491E-73;285;470;73.800;Wolbachia sp. wRi;CP001391.1;740490;741033;2.577E-87;331;556;73.900;Wolbachia sp. wRi;CP001391.1;737673;738077;6.434E-65;257;405;74.300;Wolbachia sp. wRi	280;286;332;237	0.36046511627907;0.361111111111111;0.36101083032491;0.322335025380711	74;NA	64;NA	4
GAGA-0177.Scaffold2.2457710-2512152	GAGA-0177	Lasius niger	Formicinae	Chromosome level	ankyrin_repeat_protein	Wolbachia	Rickettsiales	Alphaproteobacteria	Scaffold2	2457710	2512152	Scaffold2:2477710-2478698;Scaffold2:2488980-2489952;Scaffold2:2491662-2492152	2477710;2488980;2491662	2478698;2489952;2492152	CP001391.1;737673;738191;3.094E-86;328;519;74.300;Wolbachia sp. wRi;CP001391.1;737673;738658;2.558E-233;816;986;78.300;Wolbachia sp. wRi;CP001391.1;740947;741441;2.204E-149;537;495;84.200;Wolbachia sp. wRi	563;206;286	0.322874493927126;0.325102880658436;0.324489795918367	NA;65;44	NA;64;44	3
GAGA-0177.Scaffold6.6016355-6134369	GAGA-0177	Lasius niger	Formicinae	Chromosome level	ankyrin_repeat_protein;phosphocholine_transferase_AnkX	Wolbachia	Rickettsiales	Alphaproteobacteria	Scaffold6	6016355	6134369	Scaffold6:6036355-6036869;Scaffold6:6039008-6039460;Scaffold6:6052853-6053265;Scaffold6:6055501-6055928;Scaffold6:6111929-6112366;Scaffold6:6114029-6114369	6036355;6039008;6052853;6055501;6111929;6114029	6036869;6039460;6053265;6055928;6112366;6114369	CP001391.1;737673;738197;5.550E-93;350;525;75.200;Wolbachia sp. wRi;CP001391.1;740990;741441;1.482E-124;455;454;82.300;Wolbachia sp. wRi;CP001391.1;740611;741021;5.765E-69;270;414;74.900;Wolbachia sp. wRi;CP001391.1;741009;741441;6.887E-119;436;433;82.600;Wolbachia sp. wRi;CP001391.1;737714;738161;3.328E-89;337;448;77.200;Wolbachia sp. wRi;CP001391.1;740691;741032;5.359E-66;260;342;76.900;Wolbach…	62;456;215;235;51;261	0.301556420233463;0.311946902654867;0.361650485436893;0.311475409836066;0.295194508009153;0.358823529411765	NA;75;54;56;24	NA;74;53;77;26	6
GAGA-0187.Scaffold1.28837869-28879299	GAGA-0187	Plagiolepsis pygmaea	Formicinae	Chromosome level	NA	Wolbachia	Rickettsiales	Alphaproteobacteria	Scaffold1	28837869	28879299	Scaffold1:28857869-28858869	28857869	28858869	AM999887.1;313362;314365;1.643E-154;554;1004;72.500;Wolbachia endosymbiont of Culex quinquefasciatus Pel	867	0.278	24	24	1
GAGA-0187.Scaffold2.22448242-22488636	GAGA-0187	Plagiolepsis pygmaea	Formicinae	Chromosome level	NA	Leclercia_adecarboxylata	Enterobacterales	Gammaproteobacteria	Scaffold2	22448242	22488636	Scaffold2:22468242-22468636	22468242	22468636	CP013990.1;3889668;3890000;7.985E-108;399;341;86.200;Leclercia adecarboxylata	16794	0.507614213	18	19	1
GAGA-0187.Scaffold7.21639050-21679360	GAGA-0187	Plagiolepsis pygmaea	Formicinae	Chromosome level	NA	Sodalis_glossinidius	Enterobacterales	Gammaproteobacteria	Scaffold7	21639050	21679360	Scaffold7:21659050-21659360	21659050	21659360	AP008232.1;1757397;1757703;8.941E-53;216;311;76.900;Sodalis glossinidius str. 'morsitans'	415	0.393548387	8	10	1
GAGA-0198.Scaffold76.0-50223	GAGA-0198	Paratrechina longicornis	Formicinae	PacBio	NA	NA	NA	NA	Scaffold76	0	50223	Scaffold76:1-103;Scaffold76:14117-14252;Scaffold76:14435-14505;Scaffold76:29858-30223	1;14117;14435;29858	103;14252;14505;30223	FO704550.1;3197867;3197964;1.600E-08;70;98;75.500;Xenorhabdus doucetiae;CP000521.1;237968;238105;1.601E-08;70;138;72.600;Acinetobacter baumannii ATCC 17978;CP010351.1;182596;182664;1.854E-14;89;69;88.400;Acinetobacter johnsonii XBB1;CP000521.1;238115;238481;3.455E-31;145;367;69.200;Acinetobacter baumannii ATCC 17978	542;71;181;235	0.392156862745098;0.259259259259259;0.228571428571429;0.358904109589041	NA;26	NA;24	4
GAGA-0198.Scaffold76.176621-217496	GAGA-0198	Paratrechina longicornis	Formicinae	PacBio	NA	NA	NA	NA	Scaffold76	176621	217496	Scaffold76:196621-197496	196621	197496	CR543861.1;2224113;2224745;7.719E-81;310;633;71.000;Acinetobacter baylyi ADP1	2616	0.362285714	23	23	1
GAGA-0198.Scaffold327.0-24044	GAGA-0198	Paratrechina longicornis	Formicinae	PacBio	NA	NA	NA	NA	Scaffold327	0	24044	Scaffold327:16431-16855;Scaffold327:7418-7489	16431;7418	16855;7489	CP002130.1;1162177;1162575;1.856E-31;146;399;68.600;Candidatus Midichloria mitochondrii IricVA;CP001085.1;337459;337531;7.165E-10;74;73;82.100;Candidatus Riesia pediculicola USDA	292;75	0.290094339622642;0.408450704225352	NA	NA	2
GAGA-0198.Scaffold76.252008-286886	GAGA-0198	Paratrechina longicornis	Formicinae	PacBio	NA	NA	NA	NA	Scaffold76	252008	286886	Scaffold76:272008-272500;Scaffold76:286794-286886	272008;286794	272500;286886	AE003853.1;418658;419148;1.112E-27;133;492;66.200;Vibrio cholerae O1 biovar El Tor str. N16961;CP002190.1;1137680;1137768;1.461E-09;70;89;78.800;Bdellovibrio bacteriovorus W	420;302	0.33739837398374;0.467391304347826	36;NA	39;NA	2
GAGA-0199.Scaffold97.85278-171425	GAGA-0199	Anoplolepis gracilipes	Formicinae	High Euk busco duplication	NA	NA	NA	NA	Scaffold97	85278	171425	Scaffold97:105278-105335;Scaffold97:120156-120343;Scaffold97:139354-139503;Scaffold97:150302-151425	105278;120156;139354;150302	105335;120343;139503;151425	CP011158.1;2006608;2006666;4.621E-09;71;59;86.400;Moraxella ovis;CP000853.1;2262417;2262605;3.207E-11;79;189;69.600;Alkaliphilus oremlandii OhILAs;CP001022.1;2254326;2254397;2.482E-09;72;72;81.900;Exiguobacterium sibiricum 255-15;CP002157.1;941758;942610;6.915E-85;323;862;69.100;Maribacter sp. HTCC2170	144;236;240;9819	0.526315789473684;0.352941176470588;0.36241610738255;0.36420302760463	NA;18	NA;15	4
GAGA-0199.Scaffold221.0-29600	GAGA-0199	Anoplolepis gracilipes	Formicinae	High Euk busco duplication	NA	NA	NA	NA	Scaffold221	0	29600	Scaffold221:11315-11515;Scaffold221:11948-12202;Scaffold221:12969-13294;Scaffold221:15530-15782;Scaffold221:18297-18498;Scaffold221:24719-25022;Scaffold221:25581-26007;Scaffold221:7424-7873;Scaffold221:8012-8204	11315;11948;12969;15530;18297;24719;25581;7424;8012	11515;12202;13294;15782;18498;25022;26007;7873;8204	CP000767.2;831704;831759;8.601E-09;70;56;87.500;Campylobacter curvus 525.92;CP000407.1;329586;329754;1.111E-10;77;170;71.500;Streptococcus suis 05ZYH33;CP005963.1;1577272;1577587;3.097E-35;158;316;71.400;Spiribacter salinus M19-40;AUBO01000026.1;74067;74239;3.582E-24;122;175;76.900;Desulfovibrio gigas DSM 1382 = ATCC 19364;CP002511.1;594799;595004;4.621E-09;71;206;69.700;Candidatus Pelagibacter s…	213;869;2765;3255;72;100;157;12356;1250	0.3;0.338582677165354;0.424615384615385;0.428571428571429;0.288557213930348;0.227722772277228;0.305164319248826;0.369710467706013;0.395833333333333	NA;44;42	NA;38;42	9
GAGA-0199.Scaffold114.65861-136731	GAGA-0199	Anoplolepis gracilipes	Formicinae	High Euk busco duplication	NA	NA	NA	NA	Scaffold114	65861	136731	Scaffold114:116229-116731;Scaffold114:85861-86230	116229;85861	116731;86230	CP009761.1;343404;343900;2.580E-36;162;497;68.400;Parvimonas micra;CP003947.1;3352473;3352839;1.112E-27;133;367;69.400;Cyanobacterium aponinum PCC 10605	808;108	0.370517928286853;0.371273712737127	10;NA	9;NA	2
GAGA-0199.Scaffold125.0-130217	GAGA-0199	Anoplolepis gracilipes	Formicinae	High Euk busco duplication	NA	NA	NA	NA	Scaffold125	0	130217	Scaffold125:120677-121012;Scaffold125:32331-33572;Scaffold125:58840-59132;Scaffold125:73749-74148;Scaffold125:826-1774;Scaffold125:94269-94590;Scaffold125:95157-95506	120677;32331;58840;73749;826;94269;95157	121012;33572;59132;74148;1774;94590;95506	CP009761.1;748005;748164;2.671E-12;82;160;71.200;Parvimonas micra;CP002511.1;423788;424958;1.521E-168;601;1171;71.700;Candidatus Pelagibacter sp. IMCC9063;CP007208.1;2654857;2655150;8.601E-09;70;294;66.300;Staphylococcus xylosus;CP000422.1;299375;299558;5.351E-15;91;184;72.100;Pediococcus pentosaceus ATCC 25745;FM162591.1;860047;860476;6.916E-34;154;432;69.600;Photorhabdus asymbiotica;CP003015.1;…	644;627;71;539;4547;124;1147	0.355223880597015;0.385173247381144;0.366438356164384;0.325814536340852;0.373417721518987;0.367601246105919;0.358166189111748	NA;3	NA;5	7
GAGA-0199.Scaffold100.0-141535	GAGA-0199	Anoplolepis gracilipes	Formicinae	High Euk busco duplication	NA	NA	NA	NA	Scaffold100	0	141535	Scaffold100:121240-121535;Scaffold100:12352-12691;Scaffold100:25174-25482;Scaffold100:29770-30172;Scaffold100:33237-33899;Scaffold100:42721-43103;Scaffold100:65391-66070;Scaffold100:84443-84542	121240;12352;25174;29770;33237;42721;65391;84443	121535;12691;25482;30172;33899;43103;66070;84542	CP001997.1;253651;253838;3.207E-11;79;188;69.100;Aminobacterium colombiense DSM 12261;CP005745.1;379474;379784;1.924E-24;122;311;69.000;Borrelia coriaceae ATCC 43381;CP003156.1;467198;467507;1.854E-14;89;310;66.600;Owenweeksia hongkongensis DSM 17368;CP000383.1;2775043;2775446;1.437E-29;139;404;68.200;Cytophaga hutchinsonii ATCC 33406;CP015775.1;2265606;2266269;2.486E-26;129;664;65.000;Ochrobactr…	486;208;90;247;1698;307;2565;166	0.325423728813559;0.348082595870207;0.363636363636364;0.335820895522388;0.406344410876133;0.387434554973822;0.384388807069219;0.262626262626263	NA;13;15;3	NA;14;16;3	8
GAGA-0199.Scaffold109.102886-173503	GAGA-0199	Anoplolepis gracilipes	Formicinae	High Euk busco duplication	NA	NA	NA	NA	Scaffold109	102886	173503	Scaffold109:122886-122966;Scaffold109:142695-143057;Scaffold109:147481-147615;Scaffold109:170997-171211;Scaffold109:171337-171697	122886;142695;147481;170997;171337	122966;143057;147615;171211;171697	CP003851.1;441181;441264;1.334E-09;73;84;80.900;Leuconostoc carnosum JB16;CP003156.1;3980138;3980492;2.310E-23;119;355;68.800;Owenweeksia hongkongensis DSM 17368;CP007601.1;3795;3930;3.849E-10;75;136;72.000;Staphylococcus capitis subsp. capitis;CP002080.1;2701596;2701811;5.758E-18;101;216;70.900;Acinetobacter oleivorans DR1;CP003242.1;448626;448985;5.977E-28;134;362;68.700;Vibrio sp. EJY3	74;5147;76;201;260	0.3375;0.320441988950276;0.41044776119403;0.392523364485981;0.361111111111111	NA;7	NA;9	5
GAGA-0199.Scaffold118.84302-125435	GAGA-0199	Anoplolepis gracilipes	Formicinae	High Euk busco duplication	NA	NA	NA	NA	Scaffold118	84302	125435	Scaffold118:104302-105435	104302	105435	CP000107.1;893129;893836;1.035E-58;236;708;69.200;Ehrlichia canis str. Jake	1291	0.386584289	NA	NA	1
GAGA-0199.Scaffold149.0-22068	GAGA-0199	Anoplolepis gracilipes	Formicinae	High Euk busco duplication	NA	NA	NA	NA	Scaffold149	0	22068	Scaffold149:1448-2068	1448	2068	CP003418.1;1297194;1297728;5.978E-62;247;535;70.800;Ignavibacterium album JCM 16511	516	0.390322581	7	7	1
GAGA-0199.Scaffold183.25692-50406	GAGA-0199	Anoplolepis gracilipes	Formicinae	High Euk busco duplication	NA	NA	NA	NA	Scaffold183	25692	50406	Scaffold183:45692-46286	45692	46286	CP003805.1;388370;388961;8.941E-53;216;592;68.800;Candidatus Kinetoplastibacterium oncopeltii TCC290E	2241	0.367003367	NA	NA	1
GAGA-0199.Scaffold199.0-28246	GAGA-0199	Anoplolepis gracilipes	Formicinae	High Euk busco duplication	NA	NA	NA	NA	Scaffold199	0	28246	Scaffold199:7501-8246	7501	8246	CR925677.1;1032116;1032805;9.267E-80;306;690;70.900;Ehrlichia ruminantium str. Gardel	354	0.371812081	14	15	1
GAGA-0199.Scaffold33.14028-55070	GAGA-0199	Anoplolepis gracilipes	Formicinae	High Euk busco duplication	NA	NA	NA	NA	Scaffold33	14028	55070	Scaffold33:34028-35070	34028	35070	CP003801.1;548876;549529;8.307E-33;150;654;65.900;alpha proteobacterium HIMB59	26633	0.398272553	7	9	1
GAGA-0199.Scaffold61.121382-222490	GAGA-0199	Anoplolepis gracilipes	Formicinae	High Euk busco duplication	NA	NA	NA	NA	Scaffold61	121382	222490	Scaffold61:141382-141621;Scaffold61:167543-167999;Scaffold61:168159-168274;Scaffold61:196591-196733;Scaffold61:201925-202490	141382;167543;168159;196591;201925	141621;167999;168274;196733;202490	FP929058.1;2606138;2606361;7.165E-10;74;227;67.500;Enterococcus faecalis;CP010427.1;154179;154543;5.981E-45;191;371;71.800;Allofrancisella guangzhouensis;CP003257.1;1390444;1390560;9.960E-15;90;117;76.900;Marinitoga piezophila KA3;CP010427.1;1423420;1423560;4.621E-09;71;141;72.400;Allofrancisella guangzhouensis;CP013145.1;2207716;2207782;2.482E-09;72;67;83.500;Colwellia sp. MT41	455;244;182;215;267	0.343096234309623;0.335526315789474;0.391304347826087;0.309859154929577;0.343362831858407	NA	NA	5
GAGA-0199.Scaffold82.121640-235645	GAGA-0199	Anoplolepis gracilipes	Formicinae	High Euk busco duplication	NA	NA	NA	NA	Scaffold82	121640	235645	Scaffold82:141640-141837;Scaffold82:145947-146704;Scaffold82:152666-152845;Scaffold82:187284-187818;Scaffold82:215472-215645	141640;145947;152666;187284;215472	141837;146704;152845;187818;215645	CP002080.1;3954129;3954326;3.849E-10;75;198;69.800;Acinetobacter oleivorans DR1;CP012937.1;1268839;1269595;8.011E-40;174;758;64.800;Bacteroides thetaiotaomicron;CP003549.1;5370186;5370365;6.912E-17;97;181;73.000;Rivularia sp. PCC 7116;CP000107.1;631343;631877;3.585E-41;178;536;67.800;Ehrlichia canis str. Jake;LN681234.1;311751;311925;9.256E-12;80;175;71.700;Paeniclostridium sordellii	147;1522;98;116;81	0.345177664974619;0.402906208718626;0.385474860335196;0.376404494382022;0.398843930635838	NA;12	NA;11	5
GAGA-0199.Scaffold58.117812-158716	GAGA-0199	Anoplolepis gracilipes	Formicinae	High Euk busco duplication	NA	NA	NA	NA	Scaffold58	117812	158716	Scaffold58:137812-138716	137812	138716	CP000903.1;1111301;1111868;1.790E-38;169;578;68.400;Bacillus mycoides KBAB4	906	0.345132743	NA	NA	1
GAGA-0199.Scaffold58.423110-449307	GAGA-0199	Anoplolepis gracilipes	Formicinae	High Euk busco duplication	NA	NA	NA	NA	Scaffold58	423110	449307	Scaffold58:443110-443825	443110	443825	CP009746.1;5598823;5599543;5.359E-66;260;721;69.200;Bacillus mycoides	261	0.362237762	6	6	1
GAGA-0199.Scaffold60.364539-405477	GAGA-0199	Anoplolepis gracilipes	Formicinae	High Euk busco duplication	NA	NA	NA	NA	Scaffold60	364539	405477	Scaffold60:384539-385477	384539	385477	HG917868.1;1164317;1165223;3.857E-61;244;907;66.700;Clostridium bornimense	1113	0.353944563	NA	NA	1
GAGA-0199.Scaffold61.324242-365444	GAGA-0199	Anoplolepis gracilipes	Formicinae	High Euk busco duplication	NA	NA	NA	NA	Scaffold61	324242	365444	Scaffold61:344242-345444	344242	345444	CP001668.1;196461;197645;4.119E-132;480;1202;69.300;Mycoplasma mycoides subsp. capri str. GM12	15505	0.390183028	8	10	1
GAGA-0199.Scaffold64.123696-185088	GAGA-0199	Anoplolepis gracilipes	Formicinae	High Euk busco duplication	NA	NA	NA	NA	Scaffold64	123696	185088	Scaffold64:143696-143830;Scaffold64:156291-156422;Scaffold64:164671-165088	143696;156291;164671	143830;156422;165088	CP006917.1;902567;902702;1.723E-11;79;136;72.700;Ehrlichia muris AS145;CP003257.1;33860;33983;4.621E-09;71;124;72.500;Marinitoga piezophila KA3;CP003021.1;771619;772023;6.920E-34;154;405;69.800;Mycoplasma putrefaciens KS1	80;324;4158	0.350746268656716;0.374045801526718;0.369304556354916	NA	NA	3
GAGA-0199.Scaffold75.271199-300915	GAGA-0199	Anoplolepis gracilipes	Formicinae	High Euk busco duplication	NA	NA	NA	NA	Scaffold75	271199	300915	Scaffold75:291199-292491	291199	292491	CP000084.1;230196;231489;9.128E-165;588;1294;70.800;Candidatus Pelagibacter ubique HTCC1062	369	0.409442724	NA	NA	1
GAGA-0199.Scaffold158.0-52005	GAGA-0199	Anoplolepis gracilipes	Formicinae	High Euk busco duplication	NA	NA	NA	NA	Scaffold158	0	52005	Scaffold158:15654-16522;Scaffold158:30227-30355;Scaffold158:31397-31555;Scaffold158:31688-32005	15654;30227;31397;31688	16522;30355;31555;32005	CP013671.1;2098738;2099547;8.000E-91;343;820;69.400;Tenacibaculum dicentrarchi;CP000551.1;191405;191502;3.207E-11;79;98;77.500;Prochlorococcus marinus str. AS9601;CP002825.1;1477974;1478131;7.165E-10;74;158;70.200;Lacinutrix sp. 5H-3-7-4;CP003539.1;708238;708555;6.196E-21;111;319;68.800;Candidatus Endolissoclinum faulkneri L2	339;504;222;1162	0.3536866359447;0.3515625;0.348101265822785;0.337539432176656	NA	NA	4
GAGA-0199.Scaffold52.148534-251981	GAGA-0199	Anoplolepis gracilipes	Formicinae	High Euk busco duplication	NA	NA	NA	NA	Scaffold52	148534	251981	Scaffold52:168534-168637;Scaffold52:207267-208278;Scaffold52:230722-231235;Scaffold52:231747-231981	168534;207267;230722;231747	168637;208278;231235;231981	CP002439.1;1485123;1485227;2.482E-09;72;105;76.400;Staphylococcus pseudintermedius HKU10-03;CP004357.1;13128;13632;1.491E-39;173;505;68.300;Mycoplasma putrefaciens Mput9231;HG793133.1;736098;736472;1.857E-48;202;394;72.200;Candidatus Babela massiliensis;CP000681.1;1704165;1704383;4.621E-09;71;219;69.100;Shewanella putrefaciens CN-32	73;1329;472;1002	0.398058252427184;0.366963402571711;0.352826510721248;0.41025641025641	NA	NA	4
GAGA-0199.Scaffold49.151653-289935	GAGA-0199	Anoplolepis gracilipes	Formicinae	High Euk busco duplication	NA	NA	NA	NA	Scaffold49	151653	289935	Scaffold49:171653-172242;Scaffold49:195791-196043;Scaffold49:213561-214182;Scaffold49:214739-216800;Scaffold49:238105-238189;Scaffold49:257662-257913;Scaffold49:269683-269935	171653;195791;213561;214739;238105;257662;269683	172242;196043;214182;216800;238189;257913;269935	CP003597.1;5536203;5536796;6.920E-34;154;594;66.300;Chroococcidiopsis thermalis PCC 7203;CP012410.1;922740;922976;2.577E-19;105;237;70.800;Leptotrichia sp. oral taxon 212;CP012808.1;2931408;2931888;9.608E-22;113;495;67.100;Acinetobacter equi;CP000749.1;4522092;4522448;5.758E-18;101;357;68.000;Marinomonas sp. MWYL1;CP013671.1;2487256;2487342;1.334E-09;73;87;79.300;Tenacibaculum dicentrarchi;CP0028…	234;676;361;23203;74;89;1150	0.33616298811545;0.345238095238095;0.380032206119163;0.380883066472586;0.380952380952381;0.370517928286853;0.384920634920635	8;NA	3;NA	7
GAGA-0199.Scaffold79.155178-232468	GAGA-0199	Anoplolepis gracilipes	Formicinae	High Euk busco duplication	NA	NA	NA	NA	Scaffold79	155178	232468	Scaffold79:175178-175860;Scaffold79:176473-176587;Scaffold79:189369-189741;Scaffold79:211329-212009;Scaffold79:212179-212468	175178;176473;189369;211329;212179	175860;176587;189741;212009;212468	CP002157.1;666807;667452;5.977E-28;134;679;65.200;Maribacter sp. HTCC2170;CP002339.1;2800006;2800121;3.849E-10;75;116;74.100;Alteromonas naphthalenivorans;AP014583.1;907408;907769;2.875E-15;92;362;66.300;Winogradskyella sp. PG-2;CP006721.1;1935791;1936342;4.000E-37;165;570;67.500;Clostridium saccharobutylicum DSM 13864;AE001437.1;306216;306461;1.196E-13;87;246;69.400;Clostridium acetobutylicum AT…	6170;76;1106;5947;391	0.382697947214076;0.385964912280702;0.311827956989247;0.375;0.339100346020761	3;NA	4;NA	5
GAGA-0199.Scaffold88.195159-254910	GAGA-0199	Anoplolepis gracilipes	Formicinae	High Euk busco duplication	NA	NA	NA	NA	Scaffold88	195159	254910	Scaffold88:215159-215553;Scaffold88:239415-240470	215159;239415	215553;240470	CP014609.1;1695763;1696144;4.300E-23;118;382;67.800;Solibacillus silvestris;CP003923.1;1575163;1575656;3.097E-35;158;501;67.600;Bacillus lehensis G1	764;8389	0.411167512690355;0.369668246445498	NA;6	NA;4	2
GAGA-0199.Scaffold64.198247-284852	GAGA-0199	Anoplolepis gracilipes	Formicinae	High Euk busco duplication	NA	NA	NA	NA	Scaffold64	198247	284852	Scaffold64:218247-218710;Scaffold64:235365-235951;Scaffold64:236524-236817;Scaffold64:250237-250416;Scaffold64:251359-251637;Scaffold64:263576-264161;Scaffold64:264488-264852	218247;235365;236524;250237;251359;263576;264488	218710;235951;236817;250416;251637;264161;264852	CP003723.1;1238379;1238747;4.631E-43;184;369;71.500;Fusobacterium nucleatum subsp. animalis 4_8;CP002080.1;1356948;1357356;4.973E-12;81;409;65.700;Acinetobacter oleivorans DR1;CP009056.1;511501;511775;4.304E-40;174;275;74.300;Frischella perrara;CP003882.1;179715;179881;2.068E-10;76;167;70.800;Borreliella afzelii HLJ01;FN645454.1;1519072;1519351;1.111E-10;77;280;66.500;Bartonella clarridgeiae 73;C…	889;1996;191;1335;78;1867;1307	0.319654427645788;0.37542662116041;0.41296928327645;0.329608938547486;0.424460431654676;0.377777777777778;0.379120879120879	NA	NA	7
GAGA-0199.Scaffold75.217160-266572	GAGA-0199	Anoplolepis gracilipes	Formicinae	High Euk busco duplication	NA	NA	NA	NA	Scaffold75	217160	266572	Scaffold75:237160-237482;Scaffold75:246326-246572	237160;246326	237482;246572	CP002667.1;94269;94592;5.357E-32;148;324;70.500;Gallibacterium anatis UMN179;AP014521.1;11811;11939;3.207E-11;79;130;73.800;Candidatus Tachikawaea gelatinosa	298;224	0.372670807453416;0.32520325203252	11;NA	11;NA	2
GAGA-0199.Scaffold49.0-57662	GAGA-0199	Anoplolepis gracilipes	Formicinae	High Euk busco duplication	NA	NA	NA	NA	Scaffold49	0	57662	Scaffold49:23766-24507;Scaffold49:24613-25025;Scaffold49:3654-3816;Scaffold49:37571-37662;Scaffold49:4900-5280	23766;24613;3654;37571;4900	24507;25025;3816;37662;5280	CP013671.1;2798488;2799088;6.431E-31;144;611;66.200;Tenacibaculum dicentrarchi;CP013690.1;1655656;1656069;3.097E-35;158;414;69.900;Myroides odoratimimus;CP002872.1;506702;506863;1.196E-13;87;164;71.900;Francisella salina;CP002175.1;1746439;1746531;6.423E-14;88;93;80.600;Halanaerobium praevalens DSM 2228;CP003549.1;4727864;4728178;6.431E-31;144;315;71.100;Rivularia sp. PCC 7116	362;132;88;178;128	0.385964912280702;0.364077669902913;0.462962962962963;0.406593406593407;0.344736842105263	NA	NA	5
GAGA-0199.Scaffold165.4397-75350	GAGA-0199	Anoplolepis gracilipes	Formicinae	High Euk busco duplication	NA	NA	NA	NA	Scaffold165	4397	75350	Scaffold165:24397-25994;Scaffold165:53462-53686;Scaffold165:65620-66361;Scaffold165:67143-67346	24397;53462;65620;67143	25994;53686;66361;67346	CP002542.1;2077792;2079379;6.088E-174;619;1596;68.600;Fluviicola taffensis DSM 16823;AM295250.1;1128962;1129099;1.334E-09;73;138;72.600;Staphylococcus carnosus subsp. carnosus TM300;CP000084.1;854077;854809;4.797E-87;330;740;70.300;Candidatus Pelagibacter ubique HTCC1062;CP001431.1;46099;46224;3.451E-14;88;126;75.300;Neorickettsia risticii str. Illinois	319;685;520;261	0.368816530995617;0.34375;0.39136302294197;0.399014778325123	7;NA	8;NA	4
GAGA-0199.Scaffold109.5153-101597	GAGA-0199	Anoplolepis gracilipes	Formicinae	High Euk busco duplication	NA	NA	NA	NA	Scaffold109	5153	101597	Scaffold109:25153-25910;Scaffold109:47633-48302;Scaffold109:48721-49012;Scaffold109:74893-75125;Scaffold109:80167-80817;Scaffold109:81472-81597	25153;47633;48721;74893;80167;81472	25910;48302;49012;75125;80817;81597	CP009651.1;3782344;3783105;3.455E-31;145;762;65.400;Bacillus pseudomycoides;CP009746.1;828113;828724;3.585E-41;178;629;65.700;Bacillus mycoides;BA000016.3;535420;535697;2.395E-16;96;290;68.800;Clostridium perfringens str. 13;CP003803.1;665824;666002;6.423E-14;88;180;71.100;Candidatus Kinetoplastibacterium desouzaii TCC079E;AE016877.1;394858;395462;2.149E-71;278;623;70.700;Bacillus cereus ATCC 145…	14715;7576;261;633;8524;98	0.404227212681638;0.36322869955157;0.323024054982818;0.314655172413793;0.333846153846154;0.376	18;NA;9	18;NA;11	6
GAGA-0199.Scaffold30.290602-350947	GAGA-0199	Anoplolepis gracilipes	Formicinae	High Euk busco duplication	NA	NA	NA	NA	Scaffold30	290602	350947	Scaffold30:310602-311279;Scaffold30:311937-312001;Scaffold30:329836-330947	310602;311937;329836	311279;312001;330947	CP000236.1;442324;442451;1.601E-08;70;128;72.100;Ehrlichia chaffeensis str. Arkansas;LN681225.1;262920;262985;8.601E-09;70;66;83.300;Legionella hackeliae;CP012808.1;1613722;1613983;5.977E-28;134;262;71.800;Acinetobacter equi	1597;142;6298	0.348596750369276;0.40625;0.339333933393339	NA	NA	3
GAGA-0199.Scaffold88.12252-84456	GAGA-0199	Anoplolepis gracilipes	Formicinae	High Euk busco duplication	NA	NA	NA	NA	Scaffold88	12252	84456	Scaffold88:32252-33255;Scaffold88:48827-49219;Scaffold88:52771-52924;Scaffold88:64244-64456	32252;48827;52771;64244	33255;49219;52924;64456	FM178379.1;425640;426558;1.287E-84;322;930;68.600;Aliivibrio salmonicida LFI1238;CP009651.1;623727;623891;4.142E-13;85;165;71.800;Bacillus pseudomycoides;CP000655.1;276308;276460;7.165E-10;74;155;71.700;Polynucleobacter asymbioticus QLW-P1DMWA-1;CP002511.1;629789;630000;5.969E-11;78;214;71.200;Candidatus Pelagibacter sp. IMCC9063	2725;552;150;237	0.386839481555334;0.35969387755102;0.38562091503268;0.424528301886792	4;NA	4;NA	4
GAGA-0199.Scaffold45.304637-464117	GAGA-0199	Anoplolepis gracilipes	Formicinae	High Euk busco duplication	NA	NA	NA	NA	Scaffold45	304637	464117	Scaffold45:324637-324780;Scaffold45:342274-342500;Scaffold45:372224-373017;Scaffold45:388596-389865;Scaffold45:417209-417352;Scaffold45:443759-444117	324637;342274;372224;388596;417209;443759	324780;342500;373017;389865;417352;444117	CP014164.1;990087;990231;9.960E-15;90;145;74.600;Aerococcus viridans;FP929061.1;961332;961558;1.196E-13;87;228;70.600;Anaerostipes hadrus;CP000524.1;1125374;1125874;1.288E-33;153;504;67.300;Bartonella bacilliformis KC583;CP003947.1;307907;308926;5.767E-52;214;1035;64.400;Cyanobacterium aponinum PCC 10605;CP003803.1;681170;681311;1.601E-08;70;145;71.400;Candidatus Kinetoplastibacterium desouzaii T…	345;88;513;12092;142;542	0.41958041958042;0.415929203539823;0.370744010088272;0.40661938534279;0.286713286713287;0.371508379888268	NA;15	NA;17	6
GAGA-0199.Scaffold38.12666-106227	GAGA-0199	Anoplolepis gracilipes	Formicinae	High Euk busco duplication	NA	NA	NA	NA	Scaffold38	12666	106227	Scaffold38:32666-32733;Scaffold38:33293-33426;Scaffold38:49532-49715;Scaffold38:85389-85554;Scaffold38:85828-86227	32666;33293;49532;85389;85828	32733;33426;49715;85554;86227	CP012329.1;83497;83565;4.621E-09;71;69;82.600;Bacillus altitudinis;CP003548.1;3260156;3260233;1.601E-08;70;78;79.400;Nostoc sp. PCC 7107;FQ859183.1;762876;763058;4.973E-12;81;183;70.400;Flavobacterium branchiophilum FL-15;CP003359.1;2609117;2609268;4.458E-16;95;152;73.600;Halobacteroides halobius DSM 5150;CP000679.1;1789501;1789865;2.878E-32;148;365;69.300;Caldicellulosiruptor saccharolyticus DSM…	72;377;500;797;4976	0.343283582089552;0.37593984962406;0.39344262295082;0.345454545454545;0.393483709273183	NA	NA	5
GAGA-0199.Scaffold33.330635-419746	GAGA-0199	Anoplolepis gracilipes	Formicinae	High Euk busco duplication	NA	NA	NA	NA	Scaffold33	330635	419746	Scaffold33:350635-351861;Scaffold33:359868-361062;Scaffold33:378686-378753;Scaffold33:383126-383764;Scaffold33:384224-384520;Scaffold33:399542-399746	350635;359868;378686;383126;384224;399542	351861;361062;378753;383764;384520;399746	CP005996.1;1536625;1537448;5.347E-100;373;825;71.200;Cycloclasticus zancles 78-ME;CP000524.1;1212802;1213354;1.289E-50;209;555;69.400;Bartonella bacilliformis KC583;AM494475.1;790651;790719;2.068E-10;76;69;84.000;Orientia tsutsugamushi str. Boryong;CP001056.1;325612;326200;2.398E-67;265;607;70.400;Clostridium botulinum B str. Eklund 17B (NRP);CP006905.1;2067952;2068188;9.960E-15;90;260;68.900;Clo…	310;619;77;3354;865;71	0.424143556280587;0.391959798994975;0.313432835820896;0.343260188087774;0.266891891891892;0.401960784313726	NA	NA	6
GAGA-0199.Scaffold42.353755-408998	GAGA-0199	Anoplolepis gracilipes	Formicinae	High Euk busco duplication	NA	NA	NA	NA	Scaffold42	353755	408998	Scaffold42:373755-373937;Scaffold42:374543-374741;Scaffold42:375040-375219;Scaffold42:388601-388998	373755;374543;375040;388601	373937;374741;375219;388998	FR720602.1;772002;772172;1.435E-12;83;171;71.500;Streptococcus oralis Uo5;AM942759.1;3110156;3110292;5.351E-15;91;137;76.500;Proteus mirabilis HI4320;CP000725.1;788226;788287;1.111E-10;77;62;87.000;Streptococcus gordonii str. Challis substr. CH1;CP001034.1;700864;701245;3.585E-41;178;384;71.300;Natranaerobius thermophilus JW/NM-WN-LF	1336;171;1621;2716	0.39010989010989;0.398989898989899;0.418994413407821;0.390428211586902	NA	NA	4
GAGA-0199.Scaffold38.361615-407530	GAGA-0199	Anoplolepis gracilipes	Formicinae	High Euk busco duplication	NA	NA	NA	NA	Scaffold38	361615	407530	Scaffold38:381615-382430;Scaffold38:387419-387530	381615;387419	382430;387530	CP000472.1;3092830;3093624;7.176E-78;300;817;68.800;Shewanella piezotolerans WP3;CP000817.1;1426747;1426859;1.601E-08;70;113;73.400;Lysinibacillus sphaericus C3-41	266;147	0.433128834355828;0.351351351351351	4;NA	5;NA	2
GAGA-0199.Scaffold49.423895-537105	GAGA-0199	Anoplolepis gracilipes	Formicinae	High Euk busco duplication	NA	NA	NA	NA	Scaffold49	423895	537105	Scaffold49:443895-444014;Scaffold49:478863-479048;Scaffold49:518495-519937;Scaffold49:527497-527631	443895;478863;518495;527497	444014;479048;519937;527631	CP009687.1;2590049;2590170;5.969E-11;78;122;74.500;Clostridium aceticum;CP003345.1;4899660;4899852;2.482E-09;72;193;68.800;Bernardetia litoralis DSM 6794;CR767821.1;948031;948508;1.790E-38;169;478;67.900;Ehrlichia ruminantium str. Welgevonden;CP002157.1;313030;313165;4.621E-09;71;136;73.500;Maribacter sp. HTCC2170	79;73;917;72	0.411764705882353;0.318918918918919;0.355755894590846;0.373134328358209	NA	NA	4
GAGA-0199.Scaffold38.437724-629555	GAGA-0199	Anoplolepis gracilipes	Formicinae	High Euk busco duplication	NA	NA	NA	NA	Scaffold38	437724	629555	Scaffold38:457724-457879;Scaffold38:458843-458925;Scaffold38:491573-491714;Scaffold38:511819-512674;Scaffold38:546687-546830;Scaffold38:549026-549338;Scaffold38:579764-579870;Scaffold38:590893-591182;Scaffold38:591313-591503;Scaffold38:604507-604575;Scaffold38:609069-609234;Scaffold38:609390-609555	457724;458843;491573;511819;546687;549026;579764;590893;591313;604507;609069;609390	457879;458925;491714;512674;546830;549338;579870;591182;591503;604575;609234;609555	CP001792.1;3376914;3377010;7.711E-13;84;98;79.500;Fibrobacter succinogenes subsp. succinogenes S85;CP001185.1;1763367;1763450;4.621E-09;71;84;78.500;Thermosipho africanus TCF52B;CP000721.1;368218;368342;1.334E-09;73;125;72.800;Clostridium beijerinckii NCIMB 8052;CP012808.1;1613844;1614686;2.986E-42;182;857;65.500;Acinetobacter equi;AP009484.1;1090356;1090500;2.671E-12;82;145;72.400;Macrococcus ca…	1390;72;634;3693;390;248;60;181;2974;594;154;713	0.393548387096774;0.317073170731707;0.312056737588652;0.350877192982456;0.363636363636364;0.346153846153846;0.386792452830189;0.41522491349481;0.389473684210526;0.397058823529412;0.333333333333333;0.375757575757576	NA;8	NA;7	12
GAGA-0199.Scaffold104.29512-98601	GAGA-0199	Anoplolepis gracilipes	Formicinae	High Euk busco duplication	NA	NA	NA	NA	Scaffold104	29512	98601	Scaffold104:49512-49651;Scaffold104:49831-50220;Scaffold104:55007-55980;Scaffold104:78416-78601	49512;49831;55007;78416	49651;50220;55980;78601	CP000817.1;637433;637573;1.723E-11;79;141;72.300;Lysinibacillus sphaericus C3-41;CP006772.1;2394472;2394862;1.856E-31;146;391;68.700;Bacteroidales bacterium CF;CP014016.2;969111;969653;3.332E-38;168;549;67.300;Staphylococcus simulans;AP010872.1;592341;592524;8.601E-09;70;187;68.700;Candidatus Ishikawaella capsulata Mpkobe	80;367;9884;71	0.388489208633094;0.398457583547558;0.371017471736896;0.378378378378378	NA;14	NA;14	4
GAGA-0199.Scaffold52.493211-524506	GAGA-0199	Anoplolepis gracilipes	Formicinae	High Euk busco duplication	NA	NA	NA	NA	Scaffold52	493211	524506	Scaffold52:513211-513559;Scaffold52:514516-514621	513211;514516	513559;514621	CP006682.1;558163;558453;5.357E-32;148;291;72.200;Spiroplasma apis B31;CP002189.2;508850;508955;2.482E-09;72;107;75.900;Candidatus Blochmannia vafer str. BVAF	23378;146	0.341954022988506;0.39047619047619	16;NA	16;NA	2
GAGA-0199.Scaffold149.31860-94408	GAGA-0199	Anoplolepis gracilipes	Formicinae	High Euk busco duplication	NA	NA	NA	NA	Scaffold149	31860	94408	Scaffold149:51860-52146;Scaffold149:84561-84840	51860;84561	52146;84840	CP012034.1;208604;208891;2.671E-12;82;288;68.000;Lactobacillus ginsenosidimutans;CP002873.1;571975;572219;8.613E-26;127;245;71.400;Brachyspira pilosicoli P43/6/78	189;1586	0.339160839160839;0.362007168458781	NA;16	NA;16	2
GAGA-0199.Scaffold148.35255-93485	GAGA-0199	Anoplolepis gracilipes	Formicinae	High Euk busco duplication	NA	NA	NA	NA	Scaffold148	35255	93485	Scaffold148:55255-55827;Scaffold148:56018-57386;Scaffold148:73173-73485	55255;56018;73173	55827;57386;73485	CP012608.1;1286765;1286871;3.996E-20;108;107;82.200;Acinetobacter sp. TTH0-4;CP000023.1;1057565;1057961;5.351E-15;91;399;66.700;Streptococcus thermophilus LMG 18311;CP012808.1;3015342;3015658;2.149E-37;165;317;72.500;Acinetobacter equi	2342;25581;239	0.335664335664336;0.378654970760234;0.394230769230769	NA;4	NA;4	3
GAGA-0199.Scaffold30.546193-661570	GAGA-0199	Anoplolepis gracilipes	Formicinae	High Euk busco duplication	NA	NA	NA	NA	Scaffold30	546193	661570	Scaffold30:566193-566525;Scaffold30:601983-602160;Scaffold30:627507-627774;Scaffold30:627937-628607;Scaffold30:641442-641570	566193;601983;627507;627937;641442	566525;602160;627774;628607;641570	CP001103.3;2132967;2133078;1.601E-08;70;112;73.900;Alteromonas mediterranea DE;AP006627.1;911129;911316;1.334E-09;73;188;68.000;Bacillus clausii KSM-K16;CP000439.1;1630135;1630390;8.929E-19;104;266;70.200;Francisella tularensis subsp. novicida U112;CP000387.1;361024;361623;6.202E-38;167;612;67.700;Streptococcus sanguinis SK36;CP002543.1;1088200;1088326;3.849E-10;75;130;74.000;Desulfurobacterium t…	232;74;207;14103;76	0.340361445783133;0.406779661016949;0.438202247191011;0.402985074626866;0.3359375	NA	NA	5
GAGA-0199.Scaffold33.600079-641951	GAGA-0199	Anoplolepis gracilipes	Formicinae	High Euk busco duplication	NA	NA	NA	NA	Scaffold33	600079	641951	Scaffold33:620079-620968;Scaffold33:621231-621951	620079;621231	620968;621951	AE009951.2;441899;442796;1.336E-77;299;898;67.700;Fusobacterium nucleatum subsp. nucleatum ATCC 25586;CP002175.1;1874779;1875263;5.554E-25;124;485;66.800;Halanaerobium praevalens DSM 2228	8239;11252	0.357705286839145;0.365277777777778	NA	NA	2
GAGA-0199.Scaffold94.45241-93520	GAGA-0199	Anoplolepis gracilipes	Formicinae	High Euk busco duplication	NA	NA	NA	NA	Scaffold94	45241	93520	Scaffold94:65241-66112;Scaffold94:66234-67274;Scaffold94:73399-73520	65241;66234;73399	66112;67274;73520	CP002829.1;995860;996594;1.605E-59;239;744;67.900;Thermodesulfobacterium geofontis OPF15;CP002872.1;1981142;1981870;2.581E-53;218;729;67.700;Francisella salina;CP001056.1;3214505;3214626;1.995E-17;99;122;77.800;Clostridium botulinum B str. Eklund 17B (NRP)	28976;21274;331	0.352468427095293;0.301923076923077;0.355371900826446	NA	NA	3
GAGA-0199.Scaffold111.57858-102717	GAGA-0199	Anoplolepis gracilipes	Formicinae	High Euk busco duplication	NA	NA	NA	NA	Scaffold111	57858	102717	Scaffold111:77858-78489;Scaffold111:79784-80832;Scaffold111:81077-81500;Scaffold111:82501-82717	77858;79784;81077;82501	78489;80832;81500;82717	CP013252.1;1377600;1378189;2.071E-27;132;591;66.900;Clostridium butyricum;CP002825.1;667032;668049;2.130E-139;504;1022;71.500;Lacinutrix sp. 5H-3-7-4;CP000879.1;1970150;1970573;2.149E-37;165;424;68.600;Petrotoga mobilis SJ95;AE014133.2;348153;348370;1.601E-08;70;218;66.900;Streptococcus mutans UA159	577;920;273;71	0.354992076069731;0.37881679389313;0.401891252955083;0.337962962962963	NA;5	NA;5	4
GAGA-0200.Scaffold27.989029-1869104	GAGA-0200	Camponotus japonicus	Formicinae	PacBio	many	Blochmannia	Enterobacterales	Gammaproteobacteria	Scaffold27	989029	1869104	Scaffold27:1009029-1011343;Scaffold27:1011819-1022174;Scaffold27:1023656-1033996;Scaffold27:1034105-1041850;Scaffold27:1042362-1046420;Scaffold27:1046648-1053500;Scaffold27:1054157-1066700;Scaffold27:1067727-1069334;Scaffold27:1069623-1071227;Scaffold27:1071353-1073032;Scaffold27:1073597-1077498;Scaffold27:1078262-1091035;Scaffold27:1091303-1095014;Scaffold27:1095223-1096791;Scaffold27:1096928-11…	1009029;1011819;1023656;1034105;1042362;1046648;1054157;1067727;1069623;1071353;1073597;1078262;1091303;1095223;1096928;1102473;1105969;1107680;1109642;1112409;1141849;1151539;1152659;1153580;1162421;1170921;1172893;1185120;1190253;1197889;1202738;1204826;1244752;1254606;1262596;1270429;1271984;1273027;1276495;1304598;1317525;1326974;1329893;1379197;1383183;1398820;1407142;1409801;1422833;1424711…	1011343;1022174;1033996;1041850;1046420;1053500;1066700;1069334;1071227;1073032;1077498;1091035;1095014;1096791;1101347;1105055;1107500;1109000;1112296;1141740;1151000;1152471;1153166;1161609;1170518;1172299;1184095;1189999;1197493;1202480;1204713;1244573;1254478;1261594;1268852;1271637;1272537;1275918;1304396;1317422;1326392;1329500;1378851;1382400;1398280;1405598;1409269;1422568;1424119;1426721…	CP000016.1;453929;454917;0.000E+00;1250;989;88.900;Candidatus Blochmannia pennsylvanicus str. BPEN;CP003903.1;451164;452350;0.000E+00;1606;1187;90.200;Candidatus Blochmannia chromaiodes str. 640;BX248583.1;400010;400847;6.608E-143;516;838;73.700;Candidatus Blochmannia floridanus;CP010049.1;420230;420839;4.001E-54;221;624;68.900;Blochmannia endosymbiont of Camponotus (Colobopsis) obliquus;CP000016…	4473;66686;97658;90350;64921;32885;146343;6234;14312;31028;27095;155422;24206;3635;33598;229118;8460;29448;87788;411093;23028;9273;3174;65181;153533;7656;172330;76153;55010;36465;14212;843493;120206;149724;158452;5746;2295;137011;406387;276775;161764;17920;769240;33877;247437;78387;11029;90102;25132;22728;97274;349441;33888;118838;16801;119906;40783;1252;16086;2114;71;7104;34312;42873;208;4634;19…	0.29343128781331;0.280830516658619;0.293036750483559;0.287540348612008;0.29275505174963;0.285901926444834;0.311249302399745;0.326073428749222;0.302992518703242;0.319833234067898;0.307357087926173;0.296876223283489;0.30611694960927;0.23405612244898;0.254808780267029;0.341208365608056;0.31352057478772;0.357575757575758;0.313112283345893;0.300876206061846;0.278439514807125;0.315450643776824;0.311637…	NA;60;73;75;45;38;63;70;65;72;81;78;66	NA;74;57;70;44;55;65;83;72;62;73;76;68;66;64	117
GAGA-0200.Scaffold229.119238-161467	GAGA-0200	Camponotus japonicus	Formicinae	PacBio	NADH-quinone_oxidoreductase_subunit_C/D	Blochmannia	Enterobacterales	Gammaproteobacteria	Scaffold229	119238	161467	Scaffold229:139238-141467	139238	141467	CP000016.1;608115;608880;0.000E+00;1093;766;91.900;Candidatus Blochmannia pennsylvanicus str. BPEN	52409	0.332884702	46	39	1
GAGA-0200.Scaffold98.488458-528707	GAGA-0200	Camponotus japonicus	Formicinae	PacBio	NA	Blochmannia	Enterobacterales	Gammaproteobacteria	Scaffold98	488458	528707	Scaffold98:508458-508707	508458	508707	CP000016.1;28583;28831;1.545E-83;319;251;88.400;Candidatus Blochmannia pennsylvanicus str. BPEN	576	0.265060241	100	102	1
GAGA-0200.Scaffold212.140153-211319	GAGA-0200	Camponotus japonicus	Formicinae	PacBio	NA	NA	NA	NA	Scaffold212	140153	211319	Scaffold212:160153-160897;Scaffold212:162001-163317;Scaffold212:168561-168868;Scaffold212:169980-170719;Scaffold212:184139-184882;Scaffold212:185935-187383;Scaffold212:189001-189303;Scaffold212:190945-191319	160153;162001;168561;169980;184139;185935;189001;190945	160897;163317;168868;170719;184882;187383;189303;191319	CP000016.1;533627;534378;8.445E-179;635;752;79.000;Candidatus Blochmannia pennsylvanicus str. BPEN;CP000016.1;534607;535922;0.000E+00;1119;1318;79.300;Candidatus Blochmannia pennsylvanicus str. BPEN;CP003903.1;534253;534563;1.242E-40;176;311;73.600;Candidatus Blochmannia chromaiodes str. 640;CP000016.1;533627;534378;3.777E-180;639;752;79.400;Candidatus Blochmannia pennsylvanicus str. BPEN;CP00001…	5083;3600;177;3062;5455;4682;555;5113	0.344086021505376;0.332826747720365;0.270358306188925;0.341001353179973;0.343203230148048;0.330801104972376;0.288079470198675;0.368983957219251	11;12;0;14;61;62;50;49	12;0;15;61;49;50;48	8
GAGA-0200.Scaffold27.1955407-2056366	GAGA-0200	Camponotus japonicus	Formicinae	PacBio	NA	NA	NA	NA	Scaffold27	1955407	2056366	Scaffold27:1975407-1984619;Scaffold27:2000734-2002716;Scaffold27:2002970-2004508;Scaffold27:2004621-2007106;Scaffold27:2011821-2020439;Scaffold27:2035528-2036017;Scaffold27:2036251-2036366	1975407;2000734;2002970;2004621;2011821;2035528;2036251	1984619;2002716;2004508;2007106;2020439;2036017;2036366	CP003903.1;536428;537068;3.417E-150;540;641;80.300;Candidatus Blochmannia chromaiodes str. 640;CP003903.1;616428;617171;8.865E-233;814;768;84.000;Candidatus Blochmannia chromaiodes str. 640;CP003903.1;613673;615228;0.000E+00;1884;1556;87.500;Candidatus Blochmannia chromaiodes str. 640;CP003903.1;468441;469824;0.000E+00;1857;1384;89.900;Candidatus Blochmannia chromaiodes str. 640;CP000016.1;464875…	42080;35064;5743;34067;62282;965;89	0.28951367781155;0.30978809283552;0.297139141742523;0.283299798792757;0.299837549315386;0.314928425357873;0.252173913043478	0;NA;74;62	84;NA;63;67	7
GAGA-0200.Scaffold111.342774-384682	GAGA-0200	Camponotus japonicus	Formicinae	PacBio	N-acetylmuramic_acid_6-phosphate_etherase_1	Spiroplasma_cf.	Entoplasmatales	Mollicutes	Scaffold111	342774	384682	Scaffold111:362774-363031;Scaffold111:363196-364682	362774;363196	363031;364682	CP005078.1;792630;792888;1.386E-53;219;259;79.200;Spiroplasma syrphidicola EA-1;CP002082.1;345738;346044;1.926E-41;179;307;73.400;Spiroplasma mirum ATCC 29335	334;5302	0.245136186770428;0.271197846567968	NA	NA	2
GAGA-0200.Scaffold159.511292-567760	GAGA-0200	Camponotus japonicus	Formicinae	PacBio	NA	NA	NA	NA	Scaffold159	511292	567760	Scaffold159:531292-531755;Scaffold159:542313-557562;Scaffold159:558524-563881	531292;542313;558524	531755;557562;563881	CP003903.1;543291;543756;3.250E-191;676;466;92.400;Candidatus Blochmannia chromaiodes str. 640;CP010049.1;527698;528451;1.155E-54;223;769;67.100;Blochmannia endosymbiont of Camponotus (Colobopsis) obliquus;CP000016.1;564816;566209;0.000E+00;1519;1394;85.000;Candidatus Blochmannia pennsylvanicus str. BPEN	1653;148033;29164	0.339092872570194;0.300806610269526;0.286354302781407	64;NA;71	63;NA;59	3
GAGA-0220.Scaffold6227.0-4128	GAGA-0220	Acromyrmex octospinosus	Myrmicinae	stLFR	NA	NA	NA	NA	Scaffold6227	0	4128	Scaffold6227:1904-2555;Scaffold6227:3277-3417;Scaffold6227:573-760	1904;3277;573	2555;3417;760	AP013028.1;241312;241808;1.242E-40;176;503;68.300;Wolbachia endosymbiont of Cimex lectularius;BX293980.2;781775;781919;1.723E-11;79;145;72.600;Mycoplasma mycoides subsp. mycoides SC str. PG1;CP003883.1;56651;56830;2.873E-15;92;189;71.500;Wolbachia endosymbiont of Drosophila simulans wNo	486;160;293	0.311827956989247;0.314285714285714;0.363636363636364	NA	NA	3
GAGA-0220.Scaffold3096.0-11011	GAGA-0220	Acromyrmex octospinosus	Myrmicinae	stLFR	NA	NA	NA	NA	Scaffold3096	0	11011	Scaffold3096:3011-3984;Scaffold3096:5489-6161;Scaffold3096:8507-8940;Scaffold3096:9421-10970	3011;5489;8507;9421	3984;6161;8940;10970	AM999887.1;306279;307276;3.654E-170;606;998;72.400;Wolbachia endosymbiont of Culex quinquefasciatus Pel;AM999887.1;308732;309399;2.050E-146;527;674;77.800;Wolbachia endosymbiont of Culex quinquefasciatus Pel;CP003884.1;313949;314383;5.351E-15;91;435;65.700;Wolbachia endosymbiont of Drosophila simulans wHa;CP003883.1;1084006;1084589;1.335E-26;130;584;65.500;Wolbachia endosymbiont of Drosophila sim…	128;528;187;5121	0.303186022610483;0.325892857142857;0.381062355658199;0.342156229825694	100;161;66;97	67;127;56;91	4
GAGA-0221.Scaffold293.0-32634	GAGA-0221	Camponotus fellah	Formicinae	Chromosome level	NA	NA	NA	NA	Scaffold293	0	32634	Scaffold293:1-1011;Scaffold293:1194-9179;Scaffold293:9373-12634	1;1194;9373	1011;9179;12634	CP002189.2;578878;579845;6.655E-221;775;968;78.000;Candidatus Blochmannia vafer str. BVAF;CP002189.2;580264;581070;5.661E-171;609;807;76.900;Candidatus Blochmannia vafer str. BVAF;CP010049.1;610246;611176;7.104E-146;526;933;72.900;Blochmannia endosymbiont of Camponotus (Colobopsis) obliquus	25595;36176;71147	0.283168316831683;0.296556042579837;0.279055504446489	NA	NA	3
GAGA-0221.Scaffold246.0-37621	GAGA-0221	Camponotus fellah	Formicinae	Chromosome level	NA	NA	NA	NA	Scaffold246	0	37621	Scaffold246:12548-12972;Scaffold246:15141-15361;Scaffold246:15791-16339;Scaffold246:16484-17621	12548;15141;15791;16484	12972;15361;16339;17621	BX248583.1;148093;148518;3.855E-27;131;426;67.500;Candidatus Blochmannia floridanus;CP002511.1;420001;420142;2.482E-09;72;142;71.100;Candidatus Pelagibacter sp. IMCC9063;CP010048.1;157637;158186;1.113E-78;302;550;72.700;Blochmannia endosymbiont of Polyrhachis (Hedomyrma) turneri;CP007445.1;599665;599997;1.035E-41;180;339;72.200;Gilliamella apicola	242;1840;7624;18537	0.247641509433962;0.286363636363636;0.312043795620438;0.302550571679859	1118;NA	1135;NA	4
GAGA-0221.Scaffold142.0-49080	GAGA-0221	Camponotus fellah	Formicinae	Chromosome level	NA	NA	NA	NA	Scaffold142	0	49080	Scaffold142:14100-15119;Scaffold142:15441-15917;Scaffold142:16244-18076;Scaffold142:18183-18975;Scaffold142:19199-21726;Scaffold142:2-2611;Scaffold142:23018-23194;Scaffold142:23537-29080;Scaffold142:3191-4330;Scaffold142:4537-4951;Scaffold142:5535-5999;Scaffold142:6539-7150;Scaffold142:7338-7703;Scaffold142:7910-9049;Scaffold142:9629-12767	14100;15441;16244;18183;19199;2;23018;23537;3191;4537;5535;6539;7338;7910;9629	15119;15917;18076;18975;21726;2611;23194;29080;4330;4951;5999;7150;7703;9049;12767	CP002189.2;688114;689134;1.659E-103;385;1021;69.000;Candidatus Blochmannia vafer str. BVAF;AP012554.1;139582;139980;8.619E-43;183;399;70.100;Candidatus Pantoea carbekii;CP002189.2;686337;687077;2.437E-179;637;741;79.200;Candidatus Blochmannia vafer str. BVAF;CP010048.1;708977;709297;3.094E-18;102;321;68.400;Blochmannia endosymbiont of Polyrhachis (Hedomyrma) turneri;CP002648.1;586235;586480;1.385…	3742;1410;47090;474;18767;2902;3478;97163;1542;2140;3821;965;985;1843;8375	0.311089303238469;0.336134453781513;0.305676855895196;0.27020202020202;0.297586070439256;0.273284783441932;0.426136363636364;0.338805700883998;0.284460052677788;0.297101449275362;0.290948275862069;0.260229132569558;0.279452054794521;0.285338015803336;0.268005098789038	NA;123;786	NA;463;1397	15
GAGA-0221.Scaffold1.2742693-2782919	GAGA-0221	Camponotus fellah	Formicinae	Chromosome level	NA	NA	NA	NA	Scaffold1	2742693	2782919	Scaffold1:2762693-2762919	2762693	2762919	CP002189.2;194299;194547;2.675E-29;139;249;74.100;Candidatus Blochmannia vafer str. BVAF	932	0.230088496	NA	NA	1
GAGA-0221.Scaffold11.396033-436312	GAGA-0221	Camponotus fellah	Formicinae	Chromosome level	Bifunctional_protein_HldE	Blochmannia	Enterobacterales	Gammaproteobacteria	Scaffold11	396033	436312	Scaffold11:416033-416312	416033	416312	CP002189.2;71305;71570;6.920E-34;154;273;72.100;Candidatus Blochmannia vafer str. BVAF	302	0.286738351	33	33	1
GAGA-0221.Scaffold2.7876149-7916372	GAGA-0221	Camponotus fellah	Formicinae	Chromosome level	NA	NA	NA	NA	Scaffold2	7876149	7916372	Scaffold2:7896149-7896372	7896149	7896372	CP010049.1;585118;585327;1.725E-28;136;210;74.200;Blochmannia endosymbiont of Camponotus (Colobopsis) obliquus	3338	0.31838565	11	11	1
GAGA-0221.Scaffold3.8800002-8840310	GAGA-0221	Camponotus fellah	Formicinae	Chromosome level	N-acetylmuramic_acid_6-phosphate_etherase	Mycoplasma_mycoides	Mycoplasmatales	Mollicutes	Scaffold3	8800002	8840310	Scaffold3:8820002-8820310	8820002	8820310	BX293980.2;283224;283430;4.979E-29;138;207;75.500;Mycoplasma mycoides subsp. mycoides SC str. PG1	718	0.246753247	23	23	1
GAGA-0221.Scaffold38.212584-261205	GAGA-0221	Camponotus fellah	Formicinae	Chromosome level	NA	NA	NA	NA	Scaffold38	212584	261205	Scaffold38:241028-241205	241028	241205	CP002189.2;228348;228518;2.228E-30;142;171;78.300;Candidatus Blochmannia vafer str. BVAF	1766	0.344632768	NA	NA	1
GAGA-0221.Scaffold4.16290895-16331151	GAGA-0221	Camponotus fellah	Formicinae	Chromosome level	NA	NA	NA	NA	Scaffold4	16290895	16331151	Scaffold4:16310895-16311151	16310895	16311151	CP010048.1;63305;63548;9.976E-66;259;244;83.600;Blochmannia endosymbiont of Polyrhachis (Hedomyrma) turneri	8791	0.33203125	35	34	1
GAGA-0221.Scaffold7.9997010-10052631	GAGA-0221	Camponotus fellah	Formicinae	Chromosome level	NA	NA	NA	NA	Scaffold7	9997010	10052631	Scaffold7:10032288-10032631	10032288	10032631	CP002189.2;417331;417674;4.150E-47;198;345;73.100;Candidatus Blochmannia vafer str. BVAF	1368	0.265306122	23	24	1
GAGA-0221.Scaffold4.10812724-10852961	GAGA-0221	Camponotus fellah	Formicinae	Chromosome level	NA	NA	NA	NA	Scaffold4	10812724	10852961	Scaffold4:10832724-10832961	10832724	10832961	CP000016.1;346551;346790;1.664E-35;159;240;75.000;Candidatus Blochmannia pennsylvanicus str. BPEN	341	0.227848101	NA	NA	1
GAGA-0221.Scaffold88.0-73391	GAGA-0221	Camponotus fellah	Formicinae	Chromosome level	NA	NA	NA	NA	Scaffold88	0	73391	Scaffold88:27558-34435;Scaffold88:34607-35046;Scaffold88:35784-36903;Scaffold88:37024-41461;Scaffold88:41590-41889;Scaffold88:42186-42597;Scaffold88:43334-44992;Scaffold88:45159-45867;Scaffold88:46045-47712;Scaffold88:48679-49278;Scaffold88:49463-51412;Scaffold88:51731-52111;Scaffold88:52674-53391	27558;34607;35784;37024;41590;42186;43334;45159;46045;48679;49463;51731;52674	34435;35046;36903;41461;41889;42597;44992;45867;47712;49278;51412;52111;53391	CP000016.1;690163;691603;0.000E+00;1242;1443;79.300;Candidatus Blochmannia pennsylvanicus str. BPEN;CP011280.1;1171952;1172187;1.111E-10;77;238;68.100;Sneathia amnii;BX248583.1;630158;630864;8.302E-84;320;718;71.600;Candidatus Blochmannia floridanus;CP010048.1;664939;665713;1.331E-111;412;775;72.100;Blochmannia endosymbiont of Polyrhachis (Hedomyrma) turneri;FO704550.1;3870158;3870458;2.486E-26;1…	514661;6519;4182;192995;1296;38699;13038;13249;19775;179;12719;1107;5465	0.326741311618438;0.291571753986333;0.316353887399464;0.338517016001803;0.37123745819398;0.343065693430657;0.295536791314837;0.288135593220339;0.303539292141572;0.297161936560935;0.284248332478194;0.289473684210526;0.264993026499303	NA;0	NA;0	13
GAGA-0221.Scaffold202.15973-47039	GAGA-0221	Camponotus fellah	Formicinae	Chromosome level	NA	NA	NA	NA	Scaffold202	15973	47039	Scaffold202:35973-36886;Scaffold202:37173-38007;Scaffold202:38519-39564;Scaffold202:39872-41062;Scaffold202:42781-43581;Scaffold202:44544-45339	35973;37173;38519;39872;42781;44544	36886;38007;39564;41062;43581;45339	CP002189.2;271308;271795;4.263E-142;513;488;83.400;Candidatus Blochmannia vafer str. BVAF;CP000016.1;290156;290980;3.094E-86;328;825;68.900;Candidatus Blochmannia pennsylvanicus str. BPEN;CP002648.1;561165;561449;5.969E-11;78;293;67.000;Buchnera aphidicola str. Ua (Uroleucon ambrosiae);FO082060.1;103530;104052;1.073E-34;156;523;67.000;Methylomicrobium alcaliphilum 20Z;CP010049.1;290498;291291;9.2…	58242;2610;1710;38224;8036;7997	0.291347207009858;0.266187050359712;0.298564593301435;0.317647058823529;0.3175;0.316981132075472	NA;0	NA;0	6
GAGA-0221.Scaffold14.6468191-6509479	GAGA-0221	Camponotus fellah	Formicinae	Chromosome level	NA	NA	NA	NA	Scaffold14	6468191	6509479	Scaffold14:6488191-6488594;Scaffold14:6489091-6489479	6488191;6489091	6488594;6489479	CP003903.1;779401;779533;4.148E-30;141;133;83.400;Candidatus Blochmannia chromaiodes str. 640;CP003903.1;779402;779533;6.431E-31;144;132;84.000;Candidatus Blochmannia chromaiodes str. 640	1880;634	0.277915632754342;0.278350515463918	NA	NA	2
GAGA-0222.Scaffold356.0-44883	GAGA-0222	Temnothorax rugatulus	Myrmicinae	PacBio	NA	NA	NA	NA	Scaffold356	0	44883	Scaffold356:12454-16968;Scaffold356:18001-19831;Scaffold356:20598-21029;Scaffold356:23541-23978;Scaffold356:24386-24883	12454;18001;20598;23541;24386	16968;19831;21029;23978;24883	CP001391.1;747597;749150;0.000E+00;1379;1554;79.600;Wolbachia sp. wRi;CP001391.1;741724;743556;0.000E+00;1635;1833;80.000;Wolbachia sp. wRi;CP001391.1;1302000;1302413;9.976E-66;259;433;74.000;Wolbachia sp. wRi;CP001391.1;742453;742886;2.675E-80;308;439;76.100;Wolbachia sp. wRi;AP013028.1;762523;762634;3.849E-10;75;116;76.600;Wolbachia endosymbiont of Cimex lectularius	332;117;247;71;467	0.305272485600354;0.327322404371585;0.31554524361949;0.327231121281465;0.336016096579477	NA;26;28	NA;38;28	5
GAGA-0222.Scaffold749.0-19756	GAGA-0222	Temnothorax rugatulus	Myrmicinae	PacBio	NA	NA	NA	NA	Scaffold749	0	19756	Scaffold749:13768-14298;Scaffold749:16246-19729;Scaffold749:4798-5762	13768;16246;4798	14298;19729;5762	CP001391.1;1302000;1302238;1.336E-43;186;239;77.500;Wolbachia sp. wRi;CP001391.1;741737;742487;1.876E-194;687;755;80.400;Wolbachia sp. wRi;CP001391.1;747316;748343;3.989E-105;390;1028;72.800;Wolbachia sp. wRi	988;470;391	0.320754716981132;0.340223944875108;0.271784232365145	11;NA	10;NA	3
GAGA-0222.Scaffold262.122373-175582	GAGA-0222	Temnothorax rugatulus	Myrmicinae	PacBio	NA	NA	NA	NA	Scaffold262	122373	175582	Scaffold262:142373-142989;Scaffold262:143393-145998;Scaffold262:154768-155449;Scaffold262:155732-156175;Scaffold262:169439-175571	142373;143393;154768;155732;169439	142989;145998;155449;156175;175571	CP001391.1;748511;749128;7.601E-166;592;618;81.700;Wolbachia sp. wRi;CP001391.1;747117;748231;1.615E-266;926;1115;78.300;Wolbachia sp. wRi;CP001391.1;741737;742424;3.145E-181;643;688;80.900;Wolbachia sp. wRi;HE660029.1;154203;154641;5.360E-49;204;444;70.000;Wolbachia endosymbiont of Onchocerca ochengi;CP001391.1;748564;749128;1.189E-132;482;565;79.500;Wolbachia sp. wRi	65;396;51;987;566	0.297077922077922;0.303262955854127;0.306901615271659;0.291196388261851;0.311643835616438	NA;11	NA;10;12	5
GAGA-0222.Scaffold262.126557-168926	GAGA-0222	Temnothorax rugatulus	Myrmicinae	PacBio	Phosphocholine_transferase_AnkX	Wolbachia	Rickettsiales	Alphaproteobacteria	Scaffold262	126557	168926	Scaffold262:146557-147500;Scaffold262:147671-148926	146557;147671	147500;148926	CP001391.1;744079;745008;5.326E-229;801;945;79.400;Wolbachia sp. wRi;CP001391.1;742557;743813;0.000E+00;1124;1257;80.000;Wolbachia sp. wRi	470;714	0.336161187698834;0.307569721115538	NA	NA	2
GAGA-0222.Scaffold109.489617-529936	GAGA-0222	Temnothorax rugatulus	Myrmicinae	PacBio	NA	NA	NA	NA	Scaffold109	489617	529936	Scaffold109:509617-509936	509617	509936	AM999887.1;1148027;1148378;3.455E-31;145;352;69.800;Wolbachia endosymbiont of Culex quinquefasciatus Pel	443	0.300940439	6	6	1
GAGA-0222.Scaffold130.307625-349454	GAGA-0222	Temnothorax rugatulus	Myrmicinae	PacBio	NA	Spiroplasma_kunkelii	Entoplasmatales	Mollicutes	Scaffold130	307625	349454	Scaffold130:329306-329454	329306	329454	CP010899.1;523399;523552;1.438E-46;196;154;88.900;Spiroplasma kunkelii CR2-3x	513	0.27027027	30	29	1
GAGA-0222.Scaffold178.134536-174850	GAGA-0222	Temnothorax rugatulus	Myrmicinae	PacBio	NA	NA	NA	NA	Scaffold178	134536	174850	Scaffold178:154536-154850	154536	154850	HE983995.1;648203;648527;1.725E-79;305;325;80.600;Cardinium endosymbiont cEper1 of Encarsia pergandiella	612	0.328025478	36	30	1
GAGA-0222.Scaffold178.235521-275830	GAGA-0222	Temnothorax rugatulus	Myrmicinae	PacBio	Uncharacterized_protein_in_vnfD_5'region	Cardinium_endosymbiont	Sphingobacteriales	Sphingobacteriia	Scaffold178	235521	275830	Scaffold178:255521-255830	255521	255830	HE983995.1;648207;648527;5.355E-83;317;321;81.900;Cardinium endosymbiont cEper1 of Encarsia pergandiella	318	0.346278317	23	25	1
GAGA-0222.Scaffold592.0-25632	GAGA-0222	Temnothorax rugatulus	Myrmicinae	PacBio	NA	NA	NA	NA	Scaffold592	0	25632	Scaffold592:5205-5632	5205	5632	AP013028.1;762508;762964;4.627E-26;128;457;67.300;Wolbachia endosymbiont of Cimex lectularius	251	0.266978923	NA	NA	1
GAGA-0222.Scaffold85.838212-880532	GAGA-0222	Temnothorax rugatulus	Myrmicinae	PacBio	NA	Spiroplasma_kunkelii	Entoplasmatales	Mollicutes	Scaffold85	838212	880532	Scaffold85:858212-858361	858212	858361	CP010899.1;523399;523553;9.273E-46;193;155;88.300;Spiroplasma kunkelii CR2-3x	1008	0.288590604	15	14	1
GAGA-0222.Scaffold92.255861-296174	GAGA-0222	Temnothorax rugatulus	Myrmicinae	PacBio	Uncharacterized_protein_in_vnfD_5'region	Cardinium_endosymbiont	Sphingobacteriales	Sphingobacteriia	Scaffold92	255861	296174	Scaffold92:275861-276174	275861	276174	HE983995.1;648207;648527;4.147E-81;311;321;81.100;Cardinium endosymbiont cEper1 of Encarsia pergandiella	472	0.341853035	46	48	1
GAGA-0222.Scaffold114.0-31263	GAGA-0222	Temnothorax rugatulus	Myrmicinae	PacBio	NA	NA	NA	NA	Scaffold114	0	31263	Scaffold114:10655-11263	10655	11263	CP001391.1;748463;749073;2.041E-163;584;611;81.500;Wolbachia sp. wRi	163	0.300986842	NA	NA	1
GAGA-0222.Scaffold4.5197426-5238219	GAGA-0222	Temnothorax rugatulus	Myrmicinae	PacBio	NA	NA	NA	NA	Scaffold4	5197426	5238219	Scaffold4:5217426-5218219	5217426	5218219	CP001391.1;741757;742540;1.210E-193;684;795;79.300;Wolbachia sp. wRi	218	0.329129887	NA	NA	1
GAGA-0222.Scaffold4.5242743-5283967	GAGA-0222	Temnothorax rugatulus	Myrmicinae	PacBio	NA	NA	NA	NA	Scaffold4	5242743	5283967	Scaffold4:5262743-5263967	5262743	5263967	CP001391.1;747697;748943;2.759E-124;454;1247;71.400;Wolbachia sp. wRi	613	0.294117647	NA	NA	1
GAGA-0222.Scaffold92.473274-513486	GAGA-0222	Temnothorax rugatulus	Myrmicinae	PacBio	NA	NA	NA	NA	Scaffold92	473274	513486	Scaffold92:493274-493486	493274	493486	CP001391.1;1426452;1426661;1.155E-54;223;213;82.200;Wolbachia sp. wRi	689	0.372641509	NA	NA	1
GAGA-0222.Scaffold30.2023794-2070556	GAGA-0222	Temnothorax rugatulus	Myrmicinae	PacBio	NA	Wolbachia	Rickettsiales	Alphaproteobacteria	Scaffold30	2023794	2070556	Scaffold30:2043794-2044766;Scaffold30:2050122-2050556	2043794;2050122	2044766;2050556	CP003884.1;657562;657885;7.724E-64;253;345;76.500;Wolbachia endosymbiont of Drosophila simulans wHa;AP013028.1;332443;332877;9.619E-56;226;435;72.200;Wolbachia endosymbiont of Cimex lectularius	3174;420	0.335390946502058;0.304147465437788	28;41	29;42	2
GAGA-0222.Scaffold242.2309-45225	GAGA-0222	Temnothorax rugatulus	Myrmicinae	PacBio	ankyrin_repeat_protein	Wolbachia	Rickettsiales	Alphaproteobacteria	Scaffold242	2309	45225	Scaffold242:22309-23704;Scaffold242:24130-25225	22309;24130	23704;25225	CP001391.1;740705;741397;2.400E-274;952;693;90.600;Wolbachia sp. wRi;CP001391.1;737561;738657;0.000E+00;1580;1097;92.100;Wolbachia sp. wRi	767;812	0.346236559139785;0.329680365296804	NA	NA	2
GAGA-0222.Scaffold62.254842-303762	GAGA-0222	Temnothorax rugatulus	Myrmicinae	PacBio	ankyrin_repeat_protein	Wolbachia	Rickettsiales	Alphaproteobacteria	Scaffold62	254842	303762	Scaffold62:274842-275040;Scaffold62:275861-276719;Scaffold62:277504-277969;Scaffold62:279002-279547;Scaffold62:280538-281496;Scaffold62:283502-283762	274842;275861;277504;279002;280538;283502	275040;276719;277969;279547;281496;283762	AP013028.1;763792;763942;8.613E-26;127;152;78.900;Wolbachia endosymbiont of Cimex lectularius;AM999887.1;1147595;1148255;1.242E-57;233;661;68.700;Wolbachia endosymbiont of Culex quinquefasciatus Pel;CP001391.1;742178;742646;3.831E-129;470;469;82.500;Wolbachia sp. wRi;CP001391.1;743909;744452;5.889E-164;586;547;83.900;Wolbachia sp. wRi;CP001391.1;747426;748381;2.925E-300;1038;960;84.100;Wolbachia …	266;877;51;162;97;52	0.308080808080808;0.27972027972028;0.346236559139785;0.337614678899083;0.289144050104384;0.296153846153846	14;45;NA;37	13;49;NA;42	6
GAGA-0222.Scaffold571.10779-38773	GAGA-0222	Temnothorax rugatulus	Myrmicinae	PacBio	NA	NA	NA	NA	Scaffold571	10779	38773	Scaffold571:30779-31359;Scaffold571:35162-35301	30779;35162	31359;35301	AM999887.1;298636;299209;6.385E-133;483;582;77.700;Wolbachia endosymbiont of Culex quinquefasciatus Pel;AM999887.1;1420724;1420857;8.601E-09;70;141;73.400;Wolbachia endosymbiont of Culex quinquefasciatus Pel	1538;71	0.353448275862069;0.402877697841727	9;NA	9;NA	2
GAGA-0222.Scaffold92.457440-513783	GAGA-0222	Temnothorax rugatulus	Myrmicinae	PacBio	Pilin_gene-inverting_protein	Wolbachia	Rickettsiales	Alphaproteobacteria	Scaffold92	457440	513783	Scaffold92:477440-478841;Scaffold92:480055-480245;Scaffold92:484956-485230;Scaffold92:488478-490245;Scaffold92:493685-493783	477440;480055;484956;488478;493685	478841;480245;485230;490245;493783	CP001391.1;1016338;1016621;2.488E-60;242;284;78.800;Wolbachia sp. wRi;CP003883.1;1195697;1195896;1.241E-23;120;200;76.100;Wolbachia endosymbiont of Drosophila simulans wNo;AM999887.1;307024;307274;1.997E-34;156;276;72.100;Wolbachia endosymbiont of Culex quinquefasciatus Pel;CP001391.1;1150075;1151052;1.185E-288;999;1001;82.400;Wolbachia sp. wRi;CP001391.1;77943;78037;4.973E-12;81;97;76.900;Wolbac…	5634;121;157;9069;488	0.348322626695218;0.3;0.273722627737226;0.33786078098472;0.397959183673469	61;27;74;47;NA	52;25;72;39;NA	5
GAGA-0222.Scaffold4.5154966-5303500	GAGA-0222	Temnothorax rugatulus	Myrmicinae	PacBio	ankyrin_repeat_protein	Wolbachia	Rickettsiales	Alphaproteobacteria	Scaffold4	5154966	5303500	Scaffold4:5174966-5175375;Scaffold4:5176226-5178687;Scaffold4:5193116-5193479;Scaffold4:5201883-5202341;Scaffold4:5202688-5209996;Scaffold4:5216558-5217055;Scaffold4:5219368-5225925;Scaffold4:5234074-5234945;Scaffold4:5235824-5236693;Scaffold4:5236873-5244346;Scaffold4:5275152-5275898;Scaffold4:5276131-5283500	5174966;5176226;5193116;5201883;5202688;5216558;5219368;5234074;5235824;5236873;5275152;5276131	5175375;5178687;5193479;5202341;5209996;5217055;5225925;5234945;5236693;5244346;5275898;5283500	CP001391.1;1302000;1302410;7.446E-71;277;411;75.200;Wolbachia sp. wRi;CP001391.1;742497;743266;1.550E-212;747;770;81.800;Wolbachia sp. wRi;CP001391.1;745482;745847;3.714E-17;98;366;69.800;Wolbachia sp. wRi;AP013028.1;762510;762973;5.981E-62;247;464;73.500;Wolbachia endosymbiont of Cimex lectularius;CP001391.1;741737;743047;0.000E+00;1221;1313;80.700;Wolbachia sp. wRi;CP001391.1;1302000;1302340;2.…	1099;504;99;753;1272;671;532;2818;1008;901;1458;781	0.352078239608802;0.331166192604632;0.40495867768595;0.342794759825328;0.322386425834702;0.340040241448692;0.320115906664633;0.288174512055109;0.293440736478711;0.32557205941389;0.312332439678284;0.322838919799159	24;NA;43	22;NA;43	12
GAGA-0222.Scaffold97.508511-567641	GAGA-0222	Temnothorax rugatulus	Myrmicinae	PacBio	Pilin_gene-inverting_protein	Wolbachia	Rickettsiales	Alphaproteobacteria	Scaffold97	508511	567641	Scaffold97:528511-528911;Scaffold97:532433-534562;Scaffold97:537828-538096;Scaffold97:539041-539946;Scaffold97:540538-541863;Scaffold97:546438-546500;Scaffold97:546767-547641	528511;532433;537828;539041;540538;546438;546767	528911;534562;538096;539946;541863;546500;547641	CP001391.1;1426791;1427167;4.460E-84;320;377;79.800;Wolbachia sp. wRi;CP001391.1;1145842;1145936;7.711E-13;84;98;77.100;Wolbachia sp. wRi;AM999887.1;307024;307274;4.631E-43;184;270;75.100;Wolbachia endosymbiont of Culex quinquefasciatus Pel;CP003883.1;1194461;1195074;2.224E-98;368;614;73.400;Wolbachia endosymbiont of Drosophila simulans wNo;AM999887.1;300001;300947;4.453E-101;377;947;69.700;Wolba…	1305;12461;185;2825;2818;150;1892	0.355;0.338656646312823;0.272388059701493;0.339226519337017;0.310943396226415;0.306451612903226;0.330663615560641	36;NA;0;23;27	37;NA;0;15;30;26	7
GAGA-0222.Scaffold8.5564886-5606057	GAGA-0222	Temnothorax rugatulus	Myrmicinae	PacBio	Lysozyme_M1	Wolbachia	Rickettsiales	Alphaproteobacteria	Scaffold8	5564886	5606057	Scaffold8:5584886-5585559;Scaffold8:5585959-5586057	5584886;5585959	5585559;5586057	CP001391.1;1355373;1355487;3.855E-27;131;115;85.200;Wolbachia sp. wRi;CP001391.1;777169;777262;9.256E-12;80;94;78.700;Wolbachia sp. wRi	1143;374	0.36849925705795;0.295918367346939	34;NA	37;NA	2
GAGA-0222.Scaffold97.570539-622143	GAGA-0222	Temnothorax rugatulus	Myrmicinae	PacBio	Pilin_gene-inverting_protein	Wolbachia	Rickettsiales	Alphaproteobacteria	Scaffold97	570539	622143	Scaffold97:590539-590747;Scaffold97:591104-591503;Scaffold97:591808-593737;Scaffold97:597466-597716;Scaffold97:601217-602143	590539;591104;591808;597466;601217	590747;591503;593737;597716;602143	AE017321.1;487137;487349;3.097E-35;158;213;76.600;Wolbachia endosymbiont strain TRS of Brugia malayi;CP003884.1;1280858;1281054;1.035E-41;180;207;80.100;Wolbachia endosymbiont of Drosophila simulans wHa;AM999887.1;555397;555887;2.967E-127;464;496;81.200;Wolbachia endosymbiont of Culex quinquefasciatus Pel;AM999887.1;307024;307274;2.072E-44;189;252;77.400;Wolbachia endosymbiont of Culex quinquefas…	369;442;7251;190;3178	0.288461538461538;0.408521303258145;0.341109383100052;0.268;0.359611231101512	NA;35;27;14	NA;27;26;11	5
GAGA-0222.Scaffold58.574632-628947	GAGA-0222	Temnothorax rugatulus	Myrmicinae	PacBio	Protein_translocase_subunit_SecA;DNA_mismatch_repair_protein_MutL	Wolbachia	Rickettsiales	Alphaproteobacteria	Scaffold58	574632	628947	Scaffold58:594632-602000;Scaffold58:603001-604857;Scaffold58:605875-606474;Scaffold58:606940-608947	594632;603001;605875;606940	602000;604857;606474;608947	CP003884.1;466152;467522;0.000E+00;1452;1371;83.600;Wolbachia endosymbiont of Drosophila simulans wHa;CP003884.1;457230;459087;0.000E+00;1991;1858;83.800;Wolbachia endosymbiont of Drosophila simulans wHa;CP003884.1;455787;456381;1.014E-177;631;601;83.500;Wolbachia endosymbiont of Drosophila simulans wHa;CP003884.1;450910;451987;0.000E+00;1272;1078;86.200;Wolbachia endosymbiont of Drosophila simul…	2445;312;632;2083	0.321932681867535;0.34698275862069;0.368948247078464;0.339810662680618	NA;23	NA;23	4
GAGA-0223.Scaffold27.0-49467	GAGA-0223	Temnothorax longispinosus	Myrmicinae	PacBio	NA	NA	NA	NA	Scaffold27	0	49467	Scaffold27:1-6100;Scaffold27:12809-17302;Scaffold27:21152-29467;Scaffold27:7406-12307	1;12809;21152;7406	6100;17302;29467;12307	HG326223.1;643847;645875;0.000E+00;2877;2029;93.800;Serratia marcescens subsp. marcescens Db11;AM743169.1;2798459;2798573;2.671E-12;82;115;77.500;Stenotrophomonas maltophilia K279a;CP000826.1;1500750;1502609;0.000E+00;1589;1860;80.600;Serratia proteamaculans 568;HG326223.1;651337;651896;1.155E-54;223;564;71.800;Serratia marcescens subsp. marcescens Db11	45564;37505;122310;18858	0.587637317593048;0.589361228577788;0.615514131088394;0.622321975107121	3;NA;0	3;NA;0;2	4
GAGA-0223.Scaffold89.992952-1027588	GAGA-0223	Temnothorax longispinosus	Myrmicinae	PacBio	NA	NA	NA	NA	Scaffold89	992952	1027588	Scaffold89:1012952-1013105;Scaffold89:1022016-1022455	1012952;1022016	1013105;1022455	CP002082.1;556528;556677;7.175E-27;131;152;80.500;Spiroplasma mirum ATCC 29335;CP010899.1;31126;31376;8.613E-26;127;255;72.700;Spiroplasma kunkelii CR2-3x	276;660	0.274509803921569;0.209567198177677	13;NA	12;NA	2
GAGA-0223.Scaffold43.1154859-1220819	GAGA-0223	Temnothorax longispinosus	Myrmicinae	PacBio	ankyrin_repeat_protein	Wolbachia	Rickettsiales	Alphaproteobacteria	Scaffold43	1154859	1220819	Scaffold43:1174859-1175332;Scaffold43:1192360-1192900;Scaffold43:1200376-1200819	1174859;1192360;1200376	1175332;1192900;1200819	CP001391.1;721712;721854;2.986E-42;182;143;88.100;Wolbachia sp. wRi;AM999887.1;494945;495281;5.557E-76;294;346;78.600;Wolbachia endosymbiont of Culex quinquefasciatus Pel;AP013028.1;332443;332877;4.631E-60;241;443;72.800;Wolbachia endosymbiont of Cimex lectularius	825;405;425	0.312896405919662;0.32962962962963;0.302483069977427	37;NA;11	36;NA;11	3
GAGA-0223.Scaffold43.1157285-1198348	GAGA-0223	Temnothorax longispinosus	Myrmicinae	PacBio	NA	NA	NA	NA	Scaffold43	1157285	1198348	Scaffold43:1177285-1177673;Scaffold43:1178076-1178348	1177285;1178076	1177673;1178348	CP003883.1;116980;117375;4.463E-33;151;396;69.500;Wolbachia endosymbiont of Drosophila simulans wNo;CP003884.1;74334;74619;7.711E-13;84;286;67.500;Wolbachia endosymbiont of Drosophila simulans wHa	152;85	0.319587628865979;0.283088235294118	NA	NA	2
GAGA-0223.Scaffold29.1302907-1346278	GAGA-0223	Temnothorax longispinosus	Myrmicinae	PacBio	Phosphocholine_transferase_AnkX	Wolbachia	Rickettsiales	Alphaproteobacteria	Scaffold29	1302907	1346278	Scaffold29:1322907-1324004;Scaffold29:1324501-1326278	1322907;1324501	1324004;1326278	CP001391.1;737574;738168;1.754E-252;879;595;92.900;Wolbachia sp. wRi;CP001391.1;740075;741850;0.000E+00;2492;1779;91.100;Wolbachia sp. wRi	528;1663	0.322698268003646;0.326955543050084	NA	NA	2
GAGA-0223.Scaffold21.1415315-1536991	GAGA-0223	Temnothorax longispinosus	Myrmicinae	PacBio	ankyrin_repeat_protein	Wolbachia	Rickettsiales	Alphaproteobacteria	Scaffold21	1415315	1536991	Scaffold21:1435315-1435876;Scaffold21:1436150-1439000;Scaffold21:1440001-1443283;Scaffold21:1452543-1453219;Scaffold21:1453501-1456997;Scaffold21:1458007-1460912;Scaffold21:1473149-1474003;Scaffold21:1474501-1481687;Scaffold21:1491386-1492150;Scaffold21:1492280-1492755;Scaffold21:1493186-1500500;Scaffold21:1509751-1510100;Scaffold21:1510501-1510947;Scaffold21:1511303-1516991	1435315;1436150;1440001;1452543;1453501;1458007;1473149;1474501;1491386;1492280;1493186;1509751;1510501;1511303	1435876;1439000;1443283;1453219;1456997;1460912;1474003;1481687;1492150;1492755;1500500;1510100;1510947;1516991	AP013028.1;762510;763000;2.309E-91;345;491;76.100;Wolbachia endosymbiont of Cimex lectularius;CP001391.1;741737;743080;0.000E+00;1107;1350;78.400;Wolbachia sp. wRi;CP001391.1;745822;747849;0.000E+00;1614;2028;77.800;Wolbachia sp. wRi;AM999887.1;1147845;1148417;4.802E-36;161;573;65.800;Wolbachia endosymbiont of Culex quinquefasciatus Pel;CP001391.1;741781;743784;0.000E+00;1798;2004;80.000;Wolbachi…	974;358;241;734;322;270;1188;1949;156;757;1288;629;569	0.301247771836007;0.311228070175439;0.308653260207191;0.29585798816568;0.335240274599542;0.296385542168675;0.266978922716628;0.324102421374896;0.299738219895288;0.317894736842105;0.315012305168171;0.289398280802292;0.291479820627803;0.320147679324895	NA	NA	14
GAGA-0223.Scaffold205.134501-196617	GAGA-0223	Temnothorax longispinosus	Myrmicinae	PacBio	ankyrin_repeat_protein	Wolbachia	Rickettsiales	Alphaproteobacteria	Scaffold205	134501	196617	Scaffold205:154501-156500;Scaffold205:157711-161475;Scaffold205:161808-162345;Scaffold205:168022-174483;Scaffold205:174586-175777;Scaffold205:176045-176617	154501;157711;161808;168022;174586;176045	156500;161475;162345;174483;175777;176617	CP001391.1;746817;748841;0.000E+00;1885;2025;80.700;Wolbachia sp. wRi;CP001391.1;743715;745502;0.000E+00;1595;1788;80.000;Wolbachia sp. wRi;HE660029.1;154205;154717;9.273E-63;250;518;71.700;Wolbachia endosymbiont of Onchocerca ochengi;CP001391.1;747171;749152;0.000E+00;1914;1982;81.700;Wolbachia sp. wRi;CP001391.1;741737;742919;1.711E-286;992;1193;78.500;Wolbachia sp. wRi;HE660029.1;154176;154717…	64;499;2003;977;108;1305	0.28264132066033;0.333421891604676;0.31657355679702;0.315740597430738;0.333333333333333;0.33041958041958	NA	NA	6
GAGA-0223.Scaffold156.17736-58427	GAGA-0223	Temnothorax longispinosus	Myrmicinae	PacBio	NA	NA	NA	NA	Scaffold156	17736	58427	Scaffold156:37736-38427	37736	38427	CP001391.1;741384;742089;2.479E-223;783;706;86.900;Wolbachia sp. wRi	447	0.295224313	4	4	1
GAGA-0223.Scaffold5.3696585-3736969	GAGA-0223	Temnothorax longispinosus	Myrmicinae	PacBio	NA	Wolbachia	Rickettsiales	Alphaproteobacteria	Scaffold5	3696585	3736969	Scaffold5:3716585-3716969	3716585	3716969	AM999887.1;1053066;1053393;3.586E-58;234;386;72.700;Wolbachia endosymbiont of Culex quinquefasciatus Pel	235	0.3203125	28	26	1
GAGA-0223.Scaffold6.2670651-2711730	GAGA-0223	Temnothorax longispinosus	Myrmicinae	PacBio	NA	Wolbachia	Rickettsiales	Alphaproteobacteria	Scaffold6	2670651	2711730	Scaffold6:2690651-2691730	2690651	2691730	CP003883.1;220001;220842;0.000E+00;1149;851;90.000;Wolbachia endosymbiont of Drosophila simulans wNo	1152	0.336422614	47	52	1
GAGA-0223.Scaffold826.0-10782	GAGA-0223	Temnothorax longispinosus	Myrmicinae	PacBio	NA	NA	NA	NA	Scaffold826	0	10782	Scaffold826:1504-4695	1504	4695	CP001391.1;745986;747942;0.000E+00;1730;1998;79.200;Wolbachia sp. wRi	196	0.29175807	NA	NA	1
GAGA-0223.Scaffold10.2098171-2138355	GAGA-0223	Temnothorax longispinosus	Myrmicinae	PacBio	NA	Cardinium_endosymbiont	Sphingobacteriales	Sphingobacteriia	Scaffold10	2098171	2138355	Scaffold10:2118171-2118355	2118171	2118355	HE983995.1;647788;647972;1.073E-34;156;186;79.000;Cardinium endosymbiont cEper1 of Encarsia pergandiella	314	0.309782609	NA	NA	1
GAGA-0223.Scaffold1061.0-7084	GAGA-0223	Temnothorax longispinosus	Myrmicinae	PacBio	NA	NA	NA	NA	Scaffold1061	0	7084	Scaffold1061:2291-2819	2291	2819	CP001391.1;742537;743068;2.981E-93;351;532;75.200;Wolbachia sp. wRi	295	0.310606061	NA	NA	1
GAGA-0223.Scaffold3.2938279-2978939	GAGA-0223	Temnothorax longispinosus	Myrmicinae	PacBio	NA	Wolbachia	Rickettsiales	Alphaproteobacteria	Scaffold3	2938279	2978939	Scaffold3:2958279-2958939	2958279	2958939	CP001391.1;741778;742000;2.399E-50;208;223;80.700;Wolbachia sp. wRi	269	0.295454545	NA	NA	1
GAGA-0223.Scaffold346.72334-113057	GAGA-0223	Temnothorax longispinosus	Myrmicinae	PacBio	NA	NA	NA	NA	Scaffold346	72334	113057	Scaffold346:92334-93057	92334	93057	CP001391.1;741778;742482;7.601E-166;592;725;78.300;Wolbachia sp. wRi	203	0.300138313	NA	NA	1
GAGA-0223.Scaffold39.1522631-1562813	GAGA-0223	Temnothorax longispinosus	Myrmicinae	PacBio	NA	Cardinium_endosymbiont	Sphingobacteriales	Sphingobacteriia	Scaffold39	1522631	1562813	Scaffold39:1542631-1542813	1542631	1542813	HE983995.1;647788;647971;1.073E-34;156;184;78.800;Cardinium endosymbiont cEper1 of Encarsia pergandiella	157	0.32967033	NA	NA	1
GAGA-0223.Scaffold84.692218-732737	GAGA-0223	Temnothorax longispinosus	Myrmicinae	PacBio	NA	NA	NA	NA	Scaffold84	692218	732737	Scaffold84:712218-712737	712218	712737	CP001391.1;741778;742293;7.963E-125;456;521;79.600;Wolbachia sp. wRi	159	0.298651252	NA	NA	1
GAGA-0223.Scaffold1.1828750-1869914	GAGA-0223	Temnothorax longispinosus	Myrmicinae	PacBio	Uncharacterized_protein_YegX;Lysozyme_M1	Wolbachia	Rickettsiales	Alphaproteobacteria	Scaffold1	1828750	1869914	Scaffold1:1848750-1849431;Scaffold1:1849807-1849914	1848750;1849807	1849431;1849914	CP001391.1;1355365;1356031;1.230E-142;515;667;77.300;Wolbachia sp. wRi;AM999887.1;1383150;1383257;5.162E-22;114;108;83.300;Wolbachia endosymbiont of Culex quinquefasciatus Pel	1072;826	0.374449339207048;0.271028037383178	NA	NA	2
GAGA-0223.Scaffold71.267011-315459	GAGA-0223	Temnothorax longispinosus	Myrmicinae	PacBio	ankyrin_repeat_protein	Wolbachia	Rickettsiales	Alphaproteobacteria	Scaffold71	267011	315459	Scaffold71:287011-289984;Scaffold71:291001-294496;Scaffold71:295029-295459	287011;291001;295029	289984;294496;295459	CP001391.1;747570;749073;0.000E+00;1472;1504;81.700;Wolbachia sp. wRi;CP001391.1;743354;745323;0.000E+00;1686;1991;79.000;Wolbachia sp. wRi;AE017321.1;920090;920522;9.273E-46;193;433;69.900;Wolbachia endosymbiont strain TRS of Brugia malayi	444;271;237	0.273461150353179;0.327324749642346;0.332558139534884	29;32;NA	29;40;NA	3
GAGA-0223.Scaffold170.310827-378351	GAGA-0223	Temnothorax longispinosus	Myrmicinae	PacBio	Pilin_gene-inverting_protein	Wolbachia	Rickettsiales	Alphaproteobacteria	Scaffold170	310827	378351	Scaffold170:330827-331965;Scaffold170:333196-333425;Scaffold170:344827-345575;Scaffold170:354001-354244;Scaffold170:357969-358351	330827;333196;344827;354001;357969	331965;333425;345575;354244;358351	CP003884.1;647825;647928;9.256E-12;80;104;79.000;Wolbachia endosymbiont of Drosophila simulans wHa;AP013028.1;397491;397714;9.976E-66;259;231;84.900;Wolbachia endosymbiont of Cimex lectularius;CP003884.1;299333;300000;6.543E-177;629;673;81.100;Wolbachia endosymbiont of Drosophila simulans wHa;CP003883.1;1197835;1198058;4.304E-40;174;244;75.400;Wolbachia endosymbiont of Drosophila simulans wNo;AM9…	4507;120;2642;897;415	0.355887521968366;0.275109170305677;0.324866310160428;0.312757201646091;0.369109947643979	NA;6;29	NA;6;29	5
GAGA-0223.Scaffold120.340151-387179	GAGA-0223	Temnothorax longispinosus	Myrmicinae	PacBio	ankyrin_repeat_protein	Wolbachia	Rickettsiales	Alphaproteobacteria	Scaffold120	340151	387179	Scaffold120:360151-366003;Scaffold120:366213-367179	360151;366213	366003;367179	CP001391.1;742478;742823;2.581E-53;218;351;74.000;Wolbachia sp. wRi;CP001391.1;748193;749153;2.608E-260;905;968;80.900;Wolbachia sp. wRi	682;67	0.311859193438141;0.274327122153209	57;NA	73;NA	2
GAGA-0223.Scaffold131.648521-719701	GAGA-0223	Temnothorax longispinosus	Myrmicinae	PacBio	NA	NA	NA	NA	Scaffold131	648521	719701	Scaffold131:668521-668647;Scaffold131:681073-681222;Scaffold131:700648-700726;Scaffold131:706700-706989;Scaffold131:709421-709579	668521;681073;700648;706700;709421	668647;681222;700726;706989;709579	CP010899.1;78013;78137;9.972E-32;147;125;86.400;Spiroplasma kunkelii CR2-3x;CP010899.1;77990;78137;9.617E-39;170;148;85.800;Spiroplasma kunkelii CR2-3x;CP010899.1;390441;390519;1.662E-18;103;79;88.600;Spiroplasma kunkelii CR2-3x;CP010899.1;393105;393202;4.142E-13;85;98;80.600;Spiroplasma kunkelii CR2-3x;CP010899.1;523394;523553;3.332E-38;168;160;84.100;Spiroplasma kunkelii CR2-3x	305;1012;630;1078;495	0.246031746031746;0.288590604026846;0.269230769230769;0.217993079584775;0.272151898734177	32;39;NA;10	31;NA;10	5
GAGA-0224.Scaffold85.100846-144620	GAGA-0224	Temnothorax americanus	Myrmicinae	PacBio	NA	NA	NA	NA	Scaffold85	100846	144620	Scaffold85:120846-122351;Scaffold85:123970-124620	120846;123970	122351;124620	CP003883.1;220687;221843;0.000E+00;1500;1157;89.200;Wolbachia endosymbiont of Drosophila simulans wNo;CP003883.1;220032;220338;8.930E-87;329;307;84.000;Wolbachia endosymbiont of Drosophila simulans wNo	1462;545	0.357475083056478;0.350769230769231	22;3	3;10	2
GAGA-0224.Scaffold2.1413660-1463186	GAGA-0224	Temnothorax americanus	Myrmicinae	PacBio	ankyrin_repeat_protein	Wolbachia	Rickettsiales	Alphaproteobacteria	Scaffold2	1413660	1463186	Scaffold2:1433660-1433976;Scaffold2:1434328-1435182;Scaffold2:1435766-1443186	1433660;1434328;1435766	1433976;1435182;1443186	CP001391.1;1300314;1300609;1.289E-50;209;305;75.500;Wolbachia sp. wRi;AM999887.1;1147595;1148408;9.273E-63;250;814;67.800;Wolbachia endosymbiont of Culex quinquefasciatus Pel;CP001391.1;741736;743471;0.000E+00;1641;1736;81.100;Wolbachia sp. wRi	281;954;614	0.246835443037975;0.265807962529274;0.313611859838275	NA	NA	3
GAGA-0224.Scaffold24.2153785-2195638	GAGA-0224	Temnothorax americanus	Myrmicinae	PacBio	NA	Spiroplasma_kunkelii	Entoplasmatales	Mollicutes	Scaffold24	2153785	2195638	Scaffold24:2173785-2173936	2173785	2173936	CP010899.1;523399;523553;2.488E-43;185;155;87.200;Spiroplasma kunkelii CR2-3x	790	0.278145695	43	51	1
GAGA-0224.Scaffold8.4482488-4522881	GAGA-0224	Temnothorax americanus	Myrmicinae	PacBio	NA	NA	NA	NA	Scaffold8	4482488	4522881	Scaffold8:4502488-4502881	4502488	4502881	CP010899.1;523370;523762;2.064E-112;414;395;85.000;Spiroplasma kunkelii CR2-3x	1086	0.234096692	3	4	1
GAGA-0224.Scaffold60.428384-469052	GAGA-0224	Temnothorax americanus	Myrmicinae	PacBio	NA	Wolbachia	Rickettsiales	Alphaproteobacteria	Scaffold60	428384	469052	Scaffold60:448384-449052	448384	449052	CP001391.1;741817;742418;4.443E-118;433;615;75.800;Wolbachia sp. wRi	272	0.291916168	NA	NA	1
GAGA-0224.Scaffold10.2129895-2176312	GAGA-0224	Temnothorax americanus	Myrmicinae	PacBio	ankyrin_repeat_protein	Wolbachia	Rickettsiales	Alphaproteobacteria	Scaffold10	2129895	2176312	Scaffold10:2149895-2150361;Scaffold10:2152886-2153084;Scaffold10:2155082-2156312	2149895;2152886;2155082	2150361;2153084;2156312	CP001391.1;721530;721854;1.853E-99;371;325;85.500;Wolbachia sp. wRi;CP003884.1;74408;74616;4.621E-09;71;209;68.500;Wolbachia endosymbiont of Drosophila simulans wHa;CP003883.1;1194263;1194834;1.427E-131;478;589;78.200;Wolbachia endosymbiont of Drosophila simulans wNo	672;72;3345	0.300429184549356;0.277777777777778;0.32520325203252	24;NA;46	26;NA;44	3
GAGA-0224.Scaffold60.425854-477215	GAGA-0224	Temnothorax americanus	Myrmicinae	PacBio	NA	NA	NA	NA	Scaffold60	425854	477215	Scaffold60:445854-446333;Scaffold60:450401-456111;Scaffold60:456214-457215	445854;450401;456214	446333;456111;457215	AM999887.1;1147991;1148417;4.305E-57;231;432;73.400;Wolbachia endosymbiont of Culex quinquefasciatus Pel;CP001391.1;742560;744160;0.000E+00;1384;1601;79.300;Wolbachia sp. wRi;CP001391.1;748139;749153;1.807E-262;913;1015;80.000;Wolbachia sp. wRi	328;642;122	0.304801670146138;0.312959719789842;0.27972027972028	38;NA	39;NA	3
GAGA-0224.Scaffold137.34125-78782	GAGA-0224	Temnothorax americanus	Myrmicinae	PacBio	NA	NA	NA	NA	Scaffold137	34125	78782	Scaffold137:54125-57500;Scaffold137:58501-58782	54125;58501	57500;58782	CP001391.1;744689;746555;0.000E+00;1190;1876;74.300;Wolbachia sp. wRi;CP001391.1;748871;749153;6.923E-51;210;283;76.600;Wolbachia sp. wRi	392;58	0.31437037037037;0.256227758007117	433;NA	242;NA	2
GAGA-0224.Scaffold2.5503877-5545052	GAGA-0224	Temnothorax americanus	Myrmicinae	PacBio	Lysozyme_M1	Wolbachia	Rickettsiales	Alphaproteobacteria	Scaffold2	5503877	5545052	Scaffold2:5523877-5523997;Scaffold2:5524371-5525052	5523877;5524371	5523997;5525052	AE017321.1;579633;579748;1.854E-14;89;116;77.500;Wolbachia endosymbiont strain TRS of Brugia malayi;CP003883.1;614756;615367;1.105E-129;472;615;77.100;Wolbachia endosymbiont of Drosophila simulans wNo	626;1770	0.266666666666667;0.381791483113069	NA	NA	2
GAGA-0224.Scaffold3.6346209-6393423	GAGA-0224	Temnothorax americanus	Myrmicinae	PacBio	ankyrin_repeat_protein	Wolbachia	Rickettsiales	Alphaproteobacteria	Scaffold3	6346209	6393423	Scaffold3:6366209-6369500;Scaffold3:6370501-6373423	6366209;6370501	6369500;6373423	CP001391.1;741737;743524;0.000E+00;1638;1791;80.400;Wolbachia sp. wRi;CP001391.1;746126;748143;0.000E+00;1890;2018;80.800;Wolbachia sp. wRi	223;227	0.329079307201459;0.286789869952088	33;NA	43;NA	2
GAGA-0229.Scaffold281.0-61991	GAGA-0229	Cephalotes minutus	Myrmicinae	PacBio	NA	NA	NA	NA	Scaffold281	0	61991	Scaffold281:1-12696;Scaffold281:12962-14606;Scaffold281:15122-17174;Scaffold281:17399-19101;Scaffold281:19223-22359	1;12962;15122;17399;19223	12696;14606;17174;19101;22359	AE017321.1;799246;799550;3.855E-44;188;336;73.000;Wolbachia endosymbiont strain TRS of Brugia malayi;AP013028.1;206102;207137;0.000E+00;1410;1036;90.300;Wolbachia endosymbiont of Cimex lectularius;AP013028.1;444987;445236;1.492E-56;229;254;79.400;Wolbachia endosymbiont of Cimex lectularius;CP003884.1;697662;698743;0.000E+00;1375;1082;88.100;Wolbachia endosymbiont of Drosophila simulans wHa;CP0013…	120921;6588;22874;3423;19803	0.362032296179598;0.381995133819951;0.369883040935673;0.36192714453584;0.341836734693878	NA	NA	5
GAGA-0229.Scaffold69.1276042-1316325	GAGA-0229	Cephalotes minutus	Myrmicinae	PacBio	NA	NA	NA	NA	Scaffold69	1276042	1316325	Scaffold69:1296042-1296200;Scaffold69:1296504-1296998;Scaffold69:1297133-1300509;Scaffold69:1301003-1301272;Scaffold69:1303155-1303955;Scaffold69:1304379-1305535;Scaffold69:1305685-1307769;Scaffold69:1309396-1310044;Scaffold69:1310624-1311788;Scaffold69:1312716-1314461;Scaffold69:1315067-1316322	1296042;1296504;1297133;1301003;1303155;1304379;1305685;1309396;1310624;1312716;1315067	1296200;1296998;1300509;1301272;1303955;1305535;1307769;1310044;1311788;1314461;1316322	CP011144.1;1015753;1015904;4.621E-09;71;160;70.000;Pseudoxanthomonas suwonensis;CP003350.1;566421;566910;7.445E-37;164;496;68.900;Frateuria aurantia DSM 6220;CP012900.1;3176465;3177330;1.191E-227;797;869;80.700;Stenotrophomonas acidaminiphila;CP001389.1;2446293;2446555;2.071E-27;132;265;71.400;Sinorhizobium fredii NGR234;CP011144.1;410038;410836;3.688E-136;493;799;73.900;Pseudoxanthomonas suwonen…	144;312;183341;256;9094;48049;42303;363;4663;4411;54151	0.588607594936709;0.651821862348178;0.641291469194313;0.661710037174721;0.6475;0.636678200692042;0.603166986564299;0.584876543209877;0.633161512027491;0.646991404011461;0.558565737051793	NA;3	NA;3;5	11
GAGA-0229.Scaffold165.0-51642	GAGA-0229	Cephalotes minutus	Myrmicinae	PacBio	NA	NA	NA	NA	Scaffold165	0	51642	Scaffold165:13692-14398;Scaffold165:15021-29133;Scaffold165:30128-31642;Scaffold165:4811-5012;Scaffold165:498-4313;Scaffold165:5492-6723;Scaffold165:8159-13583	13692;15021;30128;4811;498;5492;8159	14398;29133;31642;5012;4313;6723;13583	CP001391.1;856926;857247;1.285E-101;379;322;85.700;Wolbachia sp. wRi;CP001391.1;862223;862336;1.111E-10;77;114;74.300;Wolbachia sp. wRi;CP001391.1;950902;951270;2.665E-114;421;374;87.800;Wolbachia sp. wRi;CP003883.1;748763;748834;2.482E-09;72;72;81.900;Wolbachia endosymbiont of Drosophila simulans wNo;CP001391.1;1337349;1337964;1.758E-296;1025;616;97.200;Wolbachia sp. wRi;AP013028.1;1239068;12400…	2871;80839;5902;1152;91607;1851;48355	0.365439093484419;0.340490362811791;0.329590488771466;0.527363184079602;0.362778505897772;0.332250203086921;0.355088495575221	NA;0;18;40	NA;0;36;43	7
GAGA-0229.Scaffold57.144617-244048	GAGA-0229	Cephalotes minutus	Myrmicinae	PacBio	Protein_translocase_subunit_SecF	Wolbachia;Anaplasma_marginale	NA	NA	Scaffold57	144617	244048	Scaffold57:164617-165538;Scaffold57:170082-171677;Scaffold57:172355-175211;Scaffold57:175755-177175;Scaffold57:177569-179129;Scaffold57:191552-192801;Scaffold57:192944-196437;Scaffold57:221247-222188;Scaffold57:223386-224048	164617;170082;172355;175755;177569;191552;192944;221247;223386	165538;171677;175211;177175;179129;192801;196437;222188;224048	AE017321.1;241002;241890;9.188E-287;993;889;85.000;Wolbachia endosymbiont strain TRS of Brugia malayi;CP001391.1;232134;232359;8.310E-67;263;226;85.800;Wolbachia sp. wRi;CP000030.1;414343;414806;4.148E-30;141;464;67.100;Anaplasma marginale str. St. Maries;AE017321.1;248212;248968;9.968E-83;316;757;69.100;Wolbachia endosymbiont strain TRS of Brugia malayi;AP013028.1;697425;698355;2.809E-310;1071;9…	5013;7058;17580;5209;8749;8278;10834;1254;471	0.339847991313789;0.300940438871473;0.328781512605042;0.334507042253521;0.336538461538462;0.358686949559648;0.348983681649012;0.36663124335813;0.330815709969789	21;14;NA;33	20;26;NA;33	9
GAGA-0229.Scaffold1.12124139-12164279	GAGA-0229	Cephalotes minutus	Myrmicinae	PacBio	NA	Wolbachia	Rickettsiales	Alphaproteobacteria	Scaffold1	12124139	12164279	Scaffold1:12144139-12144279	12144139	12144279	CP003884.1;290934;291075;5.166E-39;171;142;86.600;Wolbachia endosymbiont of Drosophila simulans wHa	172	0.378571429	38	38	1
GAGA-0229.Scaffold17.251803-292000	GAGA-0229	Cephalotes minutus	Myrmicinae	PacBio	NA	NA	NA	NA	Scaffold17	251803	292000	Scaffold17:271803-272000	271803	272000	CP003884.1;323258;323455;4.303E-74;287;199;92.400;Wolbachia endosymbiont of Drosophila simulans wHa	288	0.350253807	20	20	1
GAGA-0229.Scaffold18.2445400-2485653	GAGA-0229	Cephalotes minutus	Myrmicinae	PacBio	Aspartate_carbamoyltransferase	Spiroplasma_eriochei	Entoplasmatales	Mollicutes	Scaffold18	2445400	2485653	Scaffold18:2465400-2465653	2465400	2465653	CP011856.1;443918;444176;1.438E-63;252;259;81.900;Spiroplasma eriocheiris	411	0.288537549	18	18	1
GAGA-0229.Scaffold224.210823-258882	GAGA-0229	Cephalotes minutus	Myrmicinae	PacBio	NA	NA	NA	NA	Scaffold224	210823	258882	Scaffold224:230823-231935;Scaffold224:232309-233620;Scaffold224:239391-239862	230823;232309;239391	231935;233620;239862	AM999887.1;1416509;1417174;2.573E-104;388;672;72.900;Wolbachia endosymbiont of Culex quinquefasciatus Pel;AM999887.1;280200;280860;1.242E-74;289;661;70.400;Wolbachia endosymbiont of Culex quinquefasciatus Pel;CP003884.1;449432;449908;5.347E-100;373;477;77.700;Wolbachia endosymbiont of Drosophila simulans wHa	1978;3265;1149	0.382194244604317;0.326468344774981;0.29723991507431	NA;9	NA;10	3
GAGA-0229.Scaffold29.3013750-3101229	GAGA-0229	Cephalotes minutus	Myrmicinae	PacBio	NA	NA	NA	NA	Scaffold29	3013750	3101229	Scaffold29:3069958-3072684;Scaffold29:3076595-3077001;Scaffold29:3080372-3080774;Scaffold29:3082011-3091975;Scaffold29:3092458-3094457;Scaffold29:3094765-3095503;Scaffold29:3095701-3099435;Scaffold29:3099629-3101229	3069958;3076595;3080372;3082011;3092458;3094765;3095701;3099629	3072684;3077001;3080774;3091975;3094457;3095503;3099435;3101229	AM999887.1;1406059;1407074;4.616E-223;782;1044;76.200;Wolbachia endosymbiont of Culex quinquefasciatus Pel;CP001391.1;1149567;1149918;1.604E-42;182;408;73.100;Wolbachia sp. wRi;CP003883.1;1114303;1114642;4.000E-37;165;398;72.200;Wolbachia endosymbiont of Drosophila simulans wNo;CP003883.1;1112647;1113618;1.585E-239;836;991;78.800;Wolbachia endosymbiont of Drosophila simulans wNo;CP001391.1;822361…	15614;57;366;31571;11854;1081;13426;7369	0.369772560528247;0.342364532019704;0.385572139303483;0.370433560818948;0.375187593796898;0.28319783197832;0.332083556507766;0.39125	0;NA;1	1;NA	8
GAGA-0229.Scaffold165.327829-499908	GAGA-0229	Cephalotes minutus	Myrmicinae	PacBio	NA	NA	NA	NA	Scaffold165	327829	499908	Scaffold165:347829-350692;Scaffold165:351598-352562;Scaffold165:352860-354175;Scaffold165:354751-354838;Scaffold165:355266-356358;Scaffold165:357168-357641;Scaffold165:357883-363336;Scaffold165:363454-364151;Scaffold165:364567-364630;Scaffold165:364779-379058;Scaffold165:380039-385316;Scaffold165:389908-391277;Scaffold165:391632-392748;Scaffold165:393092-407931;Scaffold165:408163-408370;Scaffold1…	347829;351598;352860;354751;355266;357168;357883;363454;364567;364779;380039;389908;391632;393092;408163;408475;453221;459024;474939;476921;485604;486806;490734;491901;496621	350692;352562;354175;354838;356358;357641;363336;364151;364630;379058;385316;391277;392748;407931;408370;453084;455067;474701;475468;481995;485843;487078;490857;492132;499908	CP003883.1;249486;250000;6.120E-157;562;515;84.800;Wolbachia endosymbiont of Drosophila simulans wNo;HE660029.1;406619;407289;1.998E-51;212;691;67.900;Wolbachia endosymbiont of Onchocerca ochengi;CP001391.1;862353;862509;2.398E-33;152;157;81.000;Wolbachia sp. wRi;CP001391.1;1329520;1329577;1.601E-08;70;58;88.100;Wolbachia sp. wRi;AE017321.1;1015410;1016139;2.387E-118;434;734;73.500;Wolbachia endo…	74699;2101;5564;215;747;874;59492;2055;81;106580;164786;8783;5106;120167;290;445162;43787;102443;327;48517;172;117;202;305;30264	0.358365351030388;0.321576763485477;0.355893536121673;0.402298850574713;0.335164835164835;0.422832980972516;0.351549605721621;0.365853658536585;0.333333333333333;0.34379158204356;0.363085086223233;0.330898466033601;0.368279569892473;0.350158366466743;0.381642512077295;0.354211033647919;0.380823401950163;0.347260317662818;0.344045368620038;0.378202601497832;0.276150627615063;0.352941176470588;0.37…	0;NA;39;24;36;57;52;58	27;NA;36;0;38;39;57;53	25
GAGA-0229.Scaffold133.590973-659401	GAGA-0229	Cephalotes minutus	Myrmicinae	PacBio	NA	NA	NA	NA	Scaffold133	590973	659401	Scaffold133:610973-612694;Scaffold133:613088-616000;Scaffold133:616102-626828;Scaffold133:627450-636392;Scaffold133:636576-659401	610973;613088;616102;627450;636576	612694;616000;626828;636392;659401	AE017321.1;667302;668837;0.000E+00;1682;1536;84.200;Wolbachia endosymbiont strain TRS of Brugia malayi;AM999887.1;989437;989642;5.351E-15;91;206;70.300;Wolbachia endosymbiont of Culex quinquefasciatus Pel;CP003884.1;535376;536274;0.000E+00;1343;899;93.300;Wolbachia endosymbiont of Drosophila simulans wHa;CP001391.1;1049035;1050000;0.000E+00;1542;977;95.200;Wolbachia sp. wRi;CP003883.1;578171;5794…	35884;14633;109883;67353;556492	0.384660081348053;0.337568681318681;0.372459444340854;0.336390069335719;0.35986856516977	0;NA	59;NA	5
GAGA-0229.Scaffold369.47503-93978	GAGA-0229	Cephalotes minutus	Myrmicinae	PacBio	NA	NA	NA	NA	Scaffold369	47503	93978	Scaffold369:67503-67717;Scaffold369:68929-69584;Scaffold369:88863-88968	67503;68929;88863	67717;69584;88968	CP001391.1;1024081;1024299;1.603E-25;126;219;73.700;Wolbachia sp. wRi;AM999887.1;1176499;1176950;3.098E-52;215;452;70.900;Wolbachia endosymbiont of Culex quinquefasciatus Pel;CP001391.1;230704;230814;1.072E-17;100;111;80.700;Wolbachia sp. wRi	127;1212;584	0.364485981308411;0.332824427480916;0.304761904761905	6;NA;3	6;NA;3	3
GAGA-0229.Scaffold24.729184-788904	GAGA-0229	Cephalotes minutus	Myrmicinae	PacBio	NA	NA	NA	NA	Scaffold24	729184	788904	Scaffold24:749184-755058;Scaffold24:756710-756875;Scaffold24:764239-766135;Scaffold24:766317-768904	749184;756710;764239;766317	755058;756875;766135;768904	AM999887.1;567161;568478;0.000E+00;1668;1318;88.400;Wolbachia endosymbiont of Culex quinquefasciatus Pel;CP001391.1;1039685;1039859;4.631E-43;184;175;83.400;Wolbachia sp. wRi;CP003883.1;363316;363877;2.573E-104;388;562;75.700;Wolbachia endosymbiont of Drosophila simulans wNo;HE660029.1;712269;712957;2.619E-182;646;689;81.100;Wolbachia endosymbiont of Onchocerca ochengi	132817;140;1277;26737	0.345931222335717;0.345454545454545;0.347573839662447;0.335910320834944	NA;21	NA;27	4
GAGA-0229.Scaffold24.737697-784098	GAGA-0229	Cephalotes minutus	Myrmicinae	PacBio	NA	NA	NA	NA	Scaffold24	737697	784098	Scaffold24:757697-757979;Scaffold24:763951-764098	757697;763951	757979;764098	AE017321.1;377452;377734;1.790E-38;169;284;74.100;Wolbachia endosymbiont strain TRS of Brugia malayi;CP003883.1;119462;119608;1.601E-08;70;148;71.100;Wolbachia endosymbiont of Drosophila simulans wNo	170;321	0.322695035460993;0.306122448979592	NA	NA	2
GAGA-0229.Scaffold381.59483-83233	GAGA-0229	Cephalotes minutus	Myrmicinae	PacBio	NA	NA	NA	NA	Scaffold381	59483	83233	Scaffold381:79483-80404;Scaffold381:82549-83233	79483;82549	80404;83233	CP001391.1;231221;231736;3.043E-171;610;516;86.400;Wolbachia sp. wRi;CP001391.1;232127;232359;5.359E-66;260;234;85.000;Wolbachia sp. wRi	6150;5186	0.336590662323561;0.277777777777778	3;2	3;2	2
GAGA-0234.Scaffold41.52307-92491	GAGA-0234	Typhlomyrmex rogenhoferi	Ectatomminae	stLFR	NA	NA	NA	NA	Scaffold41	52307	92491	Scaffold41:72307-72491	72307	72491	CP000628.1;3475196;3475368;4.627E-26;128;173;76.300;Agrobacterium radiobacter K84	512	0.510869565	NA	NA	1
GAGA-0245.Chr8.9086787-9128500	GAGA-0245	Monomorium pharaonis	Myrmicinae	Chromosome level	Putative_transposase_for_insertion_sequence_element_IS6501	Wolbachia	Rickettsiales	Alphaproteobacteria	Chr8	9086787	9128500	Chr8:9106787-9108500	9106787	9108500	CP003883.1;627991;628677;3.903E-190;672;687;81.800;Wolbachia endosymbiont of Drosophila simulans wNo	9792	0.349095155	60	65	1
GAGA-0245.Chr7.18023257-18063592	GAGA-0245	Monomorium pharaonis	Myrmicinae	Chromosome level	NA	Wolbachia	Rickettsiales	Alphaproteobacteria	Chr7	18023257	18063592	Chr7:18043257-18043592	18043257	18043592	CP003884.1;270101;270429;1.035E-41;180;329;73.900;Wolbachia endosymbiont of Drosophila simulans wHa	1034	0.289552239	NA	NA	1
GAGA-0245.Chr7.18016561-18059341	GAGA-0245	Monomorium pharaonis	Myrmicinae	Chromosome level	NA	Wolbachia	Rickettsiales	Alphaproteobacteria	Chr7	18016561	18059341	Chr7:18036561-18037019;Chr7:18038803-18039341	18036561;18038803	18037019;18039341	AM999887.1;1370282;1370623;4.804E-53;217;342;74.600;Wolbachia endosymbiont of Culex quinquefasciatus Pel;AE017321.1;1049558;1049986;2.068E-95;358;429;78.700;Wolbachia endosymbiont strain TRS of Brugia malayi	183;1166	0.246724890829694;0.330855018587361	NA;45	NA;46	2
GAGA-0246.Scaffold7.9490351-9530585	GAGA-0246	Pseudoneoponera rufipes	Ponerinae	PacBio	NA	Spiroplasma_kunkelii	Entoplasmatales	Mollicutes	Scaffold7	9490351	9530585	Scaffold7:9510351-9510585	9510351	9510585	CP010899.1;1460614;1460845;6.202E-38;167;236;76.300;Spiroplasma kunkelii CR2-3x	168	0.311965812	50	50	1
GAGA-0256.Scaffold43.0-164260	GAGA-0256	Acanthomyrmex ferox	Myrmicinae	PacBio	NA	NA	NA	NA	Scaffold43	0	164260	Scaffold43:1-3838;Scaffold43:19406-20433;Scaffold43:20585-21402;Scaffold43:21533-33828;Scaffold43:34229-38008;Scaffold43:38638-39372;Scaffold43:4150-19253;Scaffold43:43150-43970;Scaffold43:48616-48721;Scaffold43:48987-49047;Scaffold43:62413-144260	1;19406;20585;21533;34229;38638;4150;43150;48616;48987;62413	3838;20433;21402;33828;38008;39372;19253;43970;48721;49047;144260	HG326223.1;3130194;3130660;6.757E-187;662;473;93.300;Serratia marcescens subsp. marcescens Db11;CP002879.1;523173;523667;1.034E-24;123;500;66.400;Cupriavidus necator N-1;AONV01000017.1;87699;88489;2.137E-122;448;803;73.700;Dickeya paradisiaca NCPPB 2511;CP006252.1;3820001;3821008;1.963E-248;866;1020;80.300;Serratia liquefaciens ATCC 27592;CP011254.1;103769;104527;5.956E-113;416;765;73.300;Serrati…	186617;1499;2450;339151;164390;42871;1124445;6926;403;78;3088537	0.584831899921814;0.59396299902629;0.605875152998776;0.612525416836112;0.646996559936491;0.555858310626703;0.638747268754552;0.60609756097561;0.6;0.583333333333333;0.599362224638655	NA;4;5	NA;4;0	11
GAGA-0256.Scaffold163.0-163062	GAGA-0256	Acanthomyrmex ferox	Myrmicinae	PacBio	NA	NA	NA	NA	Scaffold163	0	163062	Scaffold163:102980-103384;Scaffold163:10415-13532;Scaffold163:104204-105022;Scaffold163:107854-108748;Scaffold163:111939-113703;Scaffold163:114202-114347;Scaffold163:115042-115824;Scaffold163:115985-116925;Scaffold163:117442-118787;Scaffold163:119293-119431;Scaffold163:121280-121388;Scaffold163:122620-122762;Scaffold163:125509-126439;Scaffold163:128414-128918;Scaffold163:130699-134326;Scaffold163…	102980;10415;104204;107854;111939;114202;115042;115985;117442;119293;121280;122620;125509;128414;130699;1309;134809;136306;137470;13931;140348;141499;142757;15480;16025;16965;18001;21520;23713;24415;26651;29848;30122;305;38712;42065;44153;4546;5554;62067;64438;65982;68237;69682;72375;72948;76782;77692;78345;79685;80301;80641;8079;81993;83947;84421;86755;88459;95905;97937;99942	103384;13532;105022;108748;113703;114347;115824;116925;118787;119431;121388;122762;126439;128918;134326;1891;136025;137236;139617;15265;140864;142630;143062;15796;16816;17532;18254;22318;23975;25385;29332;29953;32498;523;39480;43788;44447;5404;6481;63853;65839;66333;68961;70187;72656;73274;77336;77956;78651;80195;80417;81813;9175;82683;84012;84615;87444;91507;96627;98873;100417	AM494475.1;842979;843384;2.577E-19;105;406;65.200;Orientia tsutsugamushi str. Boryong;CP003340.1;456705;457189;2.776E-56;228;485;70.900;Rickettsia montanensis str. OSU 85-930;CP000053.1;130605;131396;2.573E-104;388;792;71.300;Rickettsia felis URRWXCal2;CP001681.1;200534;200743;7.711E-13;84;210;70.400;Pedobacter heparinus DSM 2366;CP000409.1;149573;150000;1.602E-93;352;428;78.200;Rickettsia canade…	277;15861;8000;7565;17555;174;2427;4885;2315;93;143;240;2057;1144;8590;1040;6458;6629;3535;179231;1775;2491;508;16689;28579;12117;1323;3023;307;3686;90277;1675;6693;229;605;6731;837;21527;1491;8819;2358;697;1499;1383;4685;553;3178;439;358;1201;71;6376;2284;1665;82;83;1217;8384;1292;2590;1028	0.351485148514851;0.330445941610523;0.386308068459658;0.353467561521253;0.408163265306122;0.406896551724138;0.352941176470588;0.38936170212766;0.353159851301115;0.289855072463768;0.5;0.302816901408451;0.365591397849462;0.357142857142857;0.336917562724014;0.359106529209622;0.369243421052632;0.311827956989247;0.346064275733582;0.50599700149925;0.354651162790698;0.382847038019452;0.377049180327869;0…	2;NA;12;10;8;6;5;11;9;7;4;1	2;NA;3;7;11;8;6;12;4;1	61
GAGA-0256.Scaffold313.0-59195	GAGA-0256	Acanthomyrmex ferox	Myrmicinae	PacBio	NA	NA	NA	NA	Scaffold313	0	59195	Scaffold313:11004-13402;Scaffold313:14892-15849;Scaffold313:16265-16928;Scaffold313:17644-20085;Scaffold313:1769-2281;Scaffold313:20381-21412;Scaffold313:22575-24497;Scaffold313:24696-25826;Scaffold313:25952-26440;Scaffold313:26564-26970;Scaffold313:27224-28085;Scaffold313:288-673;Scaffold313:2895-3594;Scaffold313:29898-30339;Scaffold313:30459-30603;Scaffold313:32933-33149;Scaffold313:33772-34101…	11004;14892;16265;17644;1769;20381;22575;24696;25952;26564;27224;288;2895;29898;30459;32933;33772;38834;4263;6708;8069;8669	13402;15849;16928;20085;2281;21412;24497;25826;26440;26970;28085;673;3594;30339;30603;33149;34101;39195;4357;6944;8384;8889	CP000758.1;1189067;1189969;2.110E-173;617;905;75.300;Ochrobactrum anthropi ATCC 49188;CP014275.1;1504647;1505258;5.360E-49;204;612;68.300;Martelella sp. AD-3;AE017223.1;819263;819354;8.601E-09;70;93;77.400;Brucella abortus bv. 1 str. 9-941;CP003123.1;356645;357169;1.659E-103;385;526;76.400;Bartonella australis Aust/NH1;CP000431.1;2003346;2003572;1.333E-09;73;227;69.300;Rhodococcus jostii RHA1;CP0…	36578;1334;4294;169897;1179;4035;16246;4073;1236;1311;35737;1887;9432;6329;197;180;158;14717;71;6350;1011;5686	0.561301084236864;0.565308254963427;0.515837104072398;0.547726341663253;0.556640625;0.532492725509214;0.553069719042664;0.576991150442478;0.573770491803279;0.600985221674877;0.535423925667828;0.509090909090909;0.570815450643777;0.519274376417234;0.534722222222222;0.625;0.550151975683891;0.578947368421053;0.457446808510638;0.491525423728814;0.555555555555556;0.531818181818182	9;10;NA;5;4;7	8;9;NA;7;4;6	22
GAGA-0256.Scaffold120.0-41858	GAGA-0256	Acanthomyrmex ferox	Myrmicinae	PacBio	NA	NA	NA	NA	Scaffold120	0	41858	Scaffold120:11826-12905;Scaffold120:13114-13252;Scaffold120:13887-14083;Scaffold120:16519-17003;Scaffold120:17206-17344;Scaffold120:18912-19622;Scaffold120:20129-21858;Scaffold120:9817-10805	11826;13114;13887;16519;17206;18912;20129;9817	12905;13252;14083;17003;17344;19622;21858;10805	CP013114.1;1097974;1098240;2.068E-10;76;267;67.500;Staphylococcus equorum;CP002512.1;1136758;1136874;2.671E-12;82;117;76.000;Aerococcus urinae ACS-120-V-Col10a;CP005074.1;381864;381978;1.072E-17;100;115;78.200;Spiroplasma taiwanense CT-1;CP011856.1;176381;176815;2.150E-54;222;435;72.000;Spiroplasma eriocheiris;CP012622.1;422624;422757;6.423E-14;88;140;74.200;Spiroplasma cantharicola;CP005078.1;68…	5367;156;664;1195;89;889;35887;1629	0.285449490268767;0.297101449275362;0.270408163265306;0.262396694214876;0.326086956521739;0.257746478873239;0.282822440717178;0.34412955465587	NA;99;97;52	NA;94;81;0	8
GAGA-0256.Scaffold147.0-50668	GAGA-0256	Acanthomyrmex ferox	Myrmicinae	PacBio	NA	NA	NA	NA	Scaffold147	0	50668	Scaffold147:13117-14820;Scaffold147:15102-16066;Scaffold147:16321-19428;Scaffold147:19727-20070;Scaffold147:22774-22869;Scaffold147:23763-24059;Scaffold147:24358-27466;Scaffold147:27765-28686;Scaffold147:28968-29730;Scaffold147:29958-30668	13117;15102;16321;19727;22774;23763;24358;27765;28968;29958	14820;16066;19428;20070;22869;24059;27466;28686;29730;30668	CP012067.1;1973729;1973840;2.226E-13;86;112;76.700;Aggregatibacter aphrophilus;CU469464.1;33538;34516;9.968E-83;316;979;68.200;Candidatus Phytoplasma mali;CP006682.1;61348;62015;1.664E-69;272;673;69.700;Spiroplasma apis B31;CP005078.1;1014325;1014533;4.973E-12;81;209;69.000;Spiroplasma syrphidicola EA-1;CP005077.1;496148;496244;7.165E-10;74;97;77.000;Spiroplasma chrysopicola DF-1;CP006934.1;59432…	2161;595;180536;260;150;177;190356;528;575;1759	0.250733998825602;0.236514522821577;0.301255230125523;0.256559766763848;0.273684210526316;0.27027027027027;0.303410553410553;0.237785016286645;0.23490813648294;0.274647887323944	NA	NA	10
GAGA-0256.Scaffold30.1910790-1950897	GAGA-0256	Acanthomyrmex ferox	Myrmicinae	PacBio	NA	Wolbachia	Rickettsiales	Alphaproteobacteria	Scaffold30	1910790	1950897	Scaffold30:1930790-1930897	1930790	1930897	CP003884.1;77885;77992;2.071E-27;132;108;87.000;Wolbachia endosymbiont of Drosophila simulans wHa	719	0.345794393	40	40	1
GAGA-0256.Scaffold51.1241353-1281551	GAGA-0256	Acanthomyrmex ferox	Myrmicinae	PacBio	NA	Wolbachia	Rickettsiales	Alphaproteobacteria	Scaffold51	1241353	1281551	Scaffold51:1261353-1261551	1261353	1261551	HE660029.1;6861;7040;1.604E-42;182;193;81.500;Wolbachia endosymbiont of Onchocerca ochengi	395	0.257575758	NA	NA	1
GAGA-0256.Scaffold38.0-47784	GAGA-0256	Acanthomyrmex ferox	Myrmicinae	PacBio	NA	NA	NA	NA	Scaffold38	0	47784	Scaffold38:19077-19960;Scaffold38:21008-21830;Scaffold38:22072-22142;Scaffold38:22264-22366;Scaffold38:23147-23902;Scaffold38:25369-26781;Scaffold38:26949-27784	19077;21008;22072;22264;23147;25369;26949	19960;21830;22142;22366;23902;26781;27784	BX293980.2;606640;606807;3.849E-10;75;169;71.300;Mycoplasma mycoides subsp. mycoides SC str. PG1;CP006681.1;295170;295943;6.904E-102;380;779;70.300;Spiroplasma culicicola AES-1;AP012200.1;1163175;1163247;8.601E-09;70;73;82.100;Melissococcus plutonius ATCC 35311;CP000123.1;570799;570902;1.334E-09;73;104;75.700;Mycoplasma capricolum subsp. capricolum ATCC 27343;CP010899.1;128658;129399;6.921E-68;26…	2911;5614;71;74;1927;18182;23340	0.274065685164213;0.347931873479319;0.285714285714286;0.294117647058824;0.264900662251656;0.301699716713881;0.324550898203593	NA;1088;964	NA;1032;895	7
GAGA-0256.Scaffold178.208755-259839	GAGA-0256	Acanthomyrmex ferox	Myrmicinae	PacBio	NA	NA	NA	NA	Scaffold178	208755	259839	Scaffold178:228755-228910;Scaffold178:229012-229174;Scaffold178:230044-230907;Scaffold178:231540-233081;Scaffold178:235076-235730;Scaffold178:237142-237545;Scaffold178:238251-239839	228755;229012;230044;231540;235076;237142;238251	228910;229174;230907;233081;235730;237545;239839	CP006682.1;943890;944046;8.601E-09;70;157;70.400;Spiroplasma apis B31;CP011856.1;110678;110812;8.613E-26;127;135;80.700;Spiroplasma eriocheiris;CP012357.1;343098;343973;2.071E-78;302;876;68.000;Spiroplasma litorale;CP006934.1;198843;199995;1.528E-151;544;1158;71.600;Spiroplasma sabaudiense Ar-1343;BA000026.2;1347253;1347869;6.431E-31;144;628;66.500;Mycoplasma penetrans HF-2;BA000026.2;67482;67685…	71;478;1822;2911;3950;1028;36227	0.27741935483871;0.419753086419753;0.332560834298957;0.329007138221934;0.282874617737003;0.315136476426799;0.339420654911839	NA;1;573;834;1323	NA;1;708;1042;0	7
GAGA-0256.Scaffold358.4037-57866	GAGA-0256	Acanthomyrmex ferox	Myrmicinae	PacBio	NA	NA	NA	NA	Scaffold358	4037	57866	Scaffold358:24037-24199;Scaffold358:24600-25828;Scaffold358:27202-28480;Scaffold358:28696-29265;Scaffold358:30603-31602;Scaffold358:33901-34049;Scaffold358:36557-37866	24037;24600;27202;28696;30603;33901;36557	24199;25828;28480;29265;31602;34049;37866	CP010899.1;833034;833197;5.357E-32;148;164;79.800;Spiroplasma kunkelii CR2-3x;CP010899.1;960258;960927;2.488E-60;242;673;68.900;Spiroplasma kunkelii CR2-3x;CP007520.1;408151;409076;2.772E-90;341;928;68.800;Mycoplasma yeatsii GM274B;CP005077.1;400094;400663;1.242E-40;176;570;67.200;Spiroplasma chrysopicola DF-1;CP002082.1;793251;794260;7.350E-156;559;1010;72.800;Spiroplasma mirum ATCC 29335;CP0050…	1084;4837;9214;437;560;103;8262	0.253086419753086;0.294788273615635;0.259780907668232;0.300527240773286;0.275275275275275;0.304054054054054;0.323911382734912	NA;1166;1189	NA;1169;1189	7
GAGA-0256.Scaffold112.255941-531477	GAGA-0256	Acanthomyrmex ferox	Myrmicinae	PacBio	NA	NA	NA	NA	Scaffold112	255941	531477	Scaffold112:275941-291280;Scaffold112:292226-292801;Scaffold112:295299-295937;Scaffold112:298742-390955;Scaffold112:391500-442725;Scaffold112:446145-449396;Scaffold112:449664-519554;Scaffold112:521549-531477	275941;292226;295299;298742;391500;446145;449664;521549	291280;292801;295937;390955;442725;449396;519554;531477	AE005176.1;527688;528247;1.236E-281;976;561;98.900;Lactococcus lactis subsp. lactis Il1403;CP000557.1;900681;900978;1.723E-11;79;299;67.100;Geobacillus thermodenitrificans NG80-2;CP000922.1;2002815;2003209;2.147E-20;109;400;66.900;Anoxybacillus flavithermus WK1;AE005176.1;497526;497786;5.150E-107;397;261;94.600;Lactococcus lactis subsp. lactis Il1403;AE005176.1;365226;365716;1.537E-229;803;502;97…	85783;542;2182;982405;593240;42211;589633;49499	0.346958732642284;0.342608695652174;0.387147335423198;0.356435643564356;0.356408003904344;0.362965241464165;0.361093811103226;0.362308622078969	1;NA;3;5	3;NA;2;9	8
GAGA-0256.Scaffold11.5362003-5408500	GAGA-0256	Acanthomyrmex ferox	Myrmicinae	PacBio	ankyrin_repeat_protein	Wolbachia	Rickettsiales	Alphaproteobacteria	Scaffold11	5362003	5408500	Scaffold11:5382003-5385462;Scaffold11:5386503-5388500	5382003;5386503	5385462;5388500	CP001391.1;741778;743780;0.000E+00;1975;2003;81.900;Wolbachia sp. wRi;CP001391.1;746276;748274;0.000E+00;1852;1999;80.700;Wolbachia sp. wRi	172;99	0.316565481352992;0.28693039559339	NA	NA	2
GAGA-0256.Scaffold152.45549-92576	GAGA-0256	Acanthomyrmex ferox	Myrmicinae	PacBio	NA	NA	NA	NA	Scaffold152	45549	92576	Scaffold152:65549-65671;Scaffold152:67094-68238;Scaffold152:68392-69079;Scaffold152:71576-71712;Scaffold152:72084-72576	65549;67094;68392;71576;72084	65671;68238;69079;71712;72576	CP008747.1;731214;731337;1.601E-08;70;124;73.800;Staphylococcus hyicus;CP011856.1;54612;55518;9.859E-151;542;907;73.400;Spiroplasma eriocheiris;CP012622.1;1060482;1060965;7.725E-47;197;484;69.100;Spiroplasma cantharicola;FM864216.2;356851;356988;7.165E-10;74;138;71.700;Mycoplasma conjunctivae;AP006716.1;1749896;1749958;1.601E-08;70;63;84.100;Staphylococcus haemolyticus JCSC1435	319;1213;2217;75;4695	0.270491803278689;0.338286713286713;0.291120815138282;0.257352941176471;0.296747967479675	NA	NA	5
GAGA-0256.Scaffold85.731307-803073	GAGA-0256	Acanthomyrmex ferox	Myrmicinae	PacBio	NA	NA	NA	NA	Scaffold85	731307	803073	Scaffold85:751307-751688;Scaffold85:753126-754595;Scaffold85:754726-756108;Scaffold85:756376-756695;Scaffold85:763656-764711;Scaffold85:766642-768088;Scaffold85:768590-768721;Scaffold85:768876-769479;Scaffold85:770583-770722;Scaffold85:771510-771671;Scaffold85:772083-772252;Scaffold85:772719-773996;Scaffold85:777087-779199;Scaffold85:781792-782503;Scaffold85:782722-783494;Scaffold85:783778-784742…	751307;753126;754726;756376;763656;766642;768590;768876;770583;771510;772083;772719;777087;781792;782722;783778;784997;788403;789592;791450;792439;793034;796439;797642;798632;799760	751688;754595;756108;756695;764711;768088;768721;769479;770722;771671;772252;773996;779199;782503;783494;784742;788104;788699;789687;791545;792753;796140;797360;798404;799342;799960	CP005078.1;172637;172971;1.437E-29;139;335;70.300;Spiroplasma syrphidicola EA-1;CP013114.1;655790;656245;1.437E-29;139;460;67.700;Staphylococcus equorum;CP002648.1;434960;435687;5.764E-35;157;728;65.000;Buchnera aphidicola str. Ua (Uroleucon ambrosiae);CP012622.1;229181;229459;1.662E-18;103;279;68.100;Spiroplasma cantharicola;CP002082.1;662693;663698;6.887E-119;436;1013;70.500;Spiroplasma mirum A…	2630;18557;37539;3710;12347;19874;89;3532;524;144;97;8543;22758;1406;1264;520;170349;182;71;283;162159;659;575;1079;150	0.286089238845144;0.30428863172226;0.324891461649783;0.326018808777429;0.316587677725118;0.317427385892116;0.305343511450382;0.298507462686567;0.244604316546763;0.242236024844721;0.266272189349112;0.267815191855912;0.273200757575758;0.275668073136428;0.229274611398964;0.236514522821577;0.301255230125523;0.263513513513513;0.273684210526316;0.284210526315789;0.277070063694268;0.301996136509981;0.23…	NA;1231;1258;1309;1375;1357;1329	NA;1239;1295;1324;1372;1375;1305	26
GAGA-0256.Scaffold2.7896318-7937363	GAGA-0256	Acanthomyrmex ferox	Myrmicinae	PacBio	Lysozyme_M1	Wolbachia	Rickettsiales	Alphaproteobacteria	Scaffold2	7896318	7937363	Scaffold2:7916318-7916450;Scaffold2:7916727-7917363	7916318;7916727	7916450;7917363	CP001391.1;208309;208425;1.544E-15;93;123;77.200;Wolbachia sp. wRi;CP003883.1;614748;615382;1.655E-120;441;638;75.500;Wolbachia endosymbiont of Drosophila simulans wNo	265;1444	0.333333333333333;0.380503144654088	NA;53	NA;53	2
GAGA-0266.Scaffold76.0-24855	GAGA-0266	Ectomomyrmex cf. javanus	Ponerinae	PacBio	NA	NA	NA	NA	Scaffold76	0	24855	Scaffold76:1-3403;Scaffold76:3512-4855	1;3512	3403;4855	CP001349.1;1625729;1625840;3.092E-18;102;112;81.200;Methylobacterium nodulans ORS 2060;CP003093.2;2123806;2124869;1.951E-187;664;1066;75.000;Pseudoxanthomonas spadix BD-a59	76575;64150	0.668430335097002;0.671630677587491	NA	NA	2
GAGA-0266.Scaffold398.0-98956	GAGA-0266	Ectomomyrmex cf. javanus	Ponerinae	PacBio	NA	NA	NA	NA	Scaffold398	0	98956	Scaffold398:10082-12222;Scaffold398:12851-17313;Scaffold398:17422-17787;Scaffold398:18703-19912;Scaffold398:20131-25158;Scaffold398:25404-26299;Scaffold398:26679-26863;Scaffold398:27018-27229;Scaffold398:27578-28135;Scaffold398:28557-28765;Scaffold398:28973-29651;Scaffold398:29864-30705;Scaffold398:31337-32404;Scaffold398:32804-32954;Scaffold398:33092-35873;Scaffold398:37418-40057;Scaffold398:404…	10082;12851;17422;18703;20131;25404;26679;27018;27578;28557;28973;29864;31337;32804;33092;37418;40427;40818;41318;48678;50771;52173;53311;55757;5984;63236;63692;6442;6855;71369;72867;77885	12222;17313;17787;19912;25158;26299;26863;27229;28135;28765;29651;30705;32404;32954;35873;40057;40615;41183;48542;49556;51976;52863;54762;56065;6103;63449;69466;6640;9458;72730;77290;78956	CP000555.1;67297;67720;1.197E-30;143;424;68.600;Methylibium petroleiphilum PM1;FO681494.1;1608652;1609799;1.501E-202;714;1148;74.700;Xanthomonas citri pv. fuscans;CP002446.1;632179;632542;3.329E-21;112;367;68.800;Pseudoxanthomonas suwonensis 11-1;CP000248.1;246833;248007;2.775E-73;285;1175;66.900;Novosphingobium aromaticivorans DSM 12444;CP011144.1;973837;975200;0.000E+00;1437;1364;83.500;Pseudox…	77632;90888;113;5536;456967;2551;350;184;3477;1324;5439;4653;6955;194;50044;153498;302;172;420648;44014;5009;3845;46450;220;4645;279;31937;1681;146992;23393;56586;8668	0.639719626168224;0.668534289556253;0.676712328767123;0.662531017369727;0.649094887606923;0.69608938547486;0.706521739130435;0.644549763033175;0.637342908438061;0.673076923076923;0.660766961651917;0.682520808561237;0.657919400187441;0.64;0.661272923408846;0.651004168245548;0.648936170212766;0.717808219178082;0.658776301218162;0.670842824601367;0.685477178423237;0.649275362318841;0.654031702274294…	26;NA;20;13	14;NA;24;13	32
GAGA-0266.Scaffold285.77548-150897	GAGA-0266	Ectomomyrmex cf. javanus	Ponerinae	PacBio	ankyrin_repeat_protein	Wolbachia	Rickettsiales	Alphaproteobacteria	Scaffold285	77548	150897	Scaffold285:101067-101257;Scaffold285:130422-130897;Scaffold285:97548-98552;Scaffold285:99330-99967	101067;130422;97548;99330	101257;130897;98552;99967	CP003884.1;668133;668339;4.458E-16;95;207;70.200;Wolbachia endosymbiont of Drosophila simulans wHa;AP013028.1;756059;756528;1.547E-49;206;477;70.300;Wolbachia endosymbiont of Cimex lectularius;CP001391.1;741724;742412;5.326E-229;801;694;85.700;Wolbachia sp. wRi;CP001391.1;723619;723831;6.668E-24;121;237;70.000;Wolbachia sp. wRi	295;207;346;756	0.3;0.32;0.284860557768924;0.335949764521193	NA	NA	4
GAGA-0266.Scaffold743.72567-112651	GAGA-0266	Ectomomyrmex cf. javanus	Ponerinae	PacBio	NA	NA	NA	NA	Scaffold743	72567	112651	Scaffold743:101800-106474;Scaffold743:107006-107195;Scaffold743:107331-110840;Scaffold743:110963-112539;Scaffold743:92567-92813;Scaffold743:92941-93879;Scaffold743:94059-97843;Scaffold743:97971-98238;Scaffold743:99814-101664	101800;107006;107331;110963;92567;92941;94059;97971;99814	106474;107195;110840;112539;92813;93879;97843;98238;101664	CP007444.1;4185474;4186175;1.113E-78;302;702;69.900;Dyella jiangningensis;CP009429.1;5063970;5064161;1.544E-15;93;192;71.200;Sphingopyxis macrogoltabida;AE008923.1;3008570;3009468;7.152E-112;413;901;71.500;Xanthomonas citri pv. citri str. 306;CP008714.1;4367550;4368083;1.664E-69;272;534;72.400;Xanthomonas translucens pv. undulosa;CP001854.1;2519035;2519182;1.435E-12;83;148;72.200;Conexibacter woe…	31976;94;39567;10682;297;3974;169404;2546;7305	0.665596919127086;0.682539682539683;0.672271302365346;0.654822335025381;0.654471544715447;0.639658848614073;0.677589852008457;0.606741573033708;0.668648648648649	NA	NA	9
GAGA-0266.Scaffold1242.0-30176	GAGA-0266	Ectomomyrmex cf. javanus	Ponerinae	PacBio	NA	NA	NA	NA	Scaffold1242	0	30176	Scaffold1242:10501-11323;Scaffold1242:12029-12569;Scaffold1242:7918-9779	10501;12029;7918	11323;12569;9779	AM999887.1;305984;306809;5.969E-96;360;826;69.800;Wolbachia endosymbiont of Culex quinquefasciatus Pel;AM999887.1;304852;305372;6.923E-51;210;542;69.200;Wolbachia endosymbiont of Culex quinquefasciatus Pel;AM999887.1;307848;309401;1.029E-282;980;1581;73.600;Wolbachia endosymbiont of Culex quinquefasciatus Pel	257;211;1229	0.294403892944039;0.281481481481481;0.285330467490596	11;6	11;10	3
GAGA-0266.Scaffold285.70005-144215	GAGA-0266	Ectomomyrmex cf. javanus	Ponerinae	PacBio	NA	NA	NA	NA	Scaffold285	70005	144215	Scaffold285:123501-124215;Scaffold285:90005-96500	123501;90005	124215;96500	CP001391.1;745956;746615;9.267E-80;306;716;73.400;Wolbachia sp. wRi;CP001391.1;746786;748807;0.000E+00;2822;2022;91.100;Wolbachia sp. wRi	307;650	0.352941176470588;0.335334872979215	0;NA	0;NA	2
GAGA-0266.Scaffold101.123868-171118	GAGA-0266	Ectomomyrmex cf. javanus	Ponerinae	PacBio	ankyrin_repeat_protein	Wolbachia	Rickettsiales	Alphaproteobacteria	Scaffold101	123868	171118	Scaffold101:143868-144318;Scaffold101:144434-145848;Scaffold101:147010-147486;Scaffold101:149664-150288;Scaffold101:150848-151118	143868;144434;147010;149664;150848	144318;145848;147486;150288;151118	AM999887.1;308949;309400;1.992E-102;381;452;78.700;Wolbachia endosymbiont of Culex quinquefasciatus Pel;AM999887.1;307494;308873;6.088E-174;619;1416;70.000;Wolbachia endosymbiont of Culex quinquefasciatus Pel;AM999887.1;305818;306292;1.926E-58;235;478;71.600;Wolbachia endosymbiont of Culex quinquefasciatus Pel;AM999887.1;303175;303749;6.184E-106;393;626;73.400;Wolbachia endosymbiont of Culex quin…	267;620;108;133;249	0.308888888888889;0.301980198019802;0.275210084033613;0.301282051282051;0.248148148148148	NA;57;37	NA;36	5
GAGA-0266.Scaffold33.1545836-1591887	GAGA-0266	Ectomomyrmex cf. javanus	Ponerinae	PacBio	NA	Wolbachia	Rickettsiales	Alphaproteobacteria	Scaffold33	1545836	1591887	Scaffold33:1565836-1566119;Scaffold33:1567275-1569220;Scaffold33:1570385-1570875;Scaffold33:1571017-1571887	1565836;1567275;1570385;1571017	1566119;1569220;1570875;1571887	CP003883.1;197863;198156;3.714E-17;98;294;66.200;Wolbachia endosymbiont of Drosophila simulans wNo;AM999887.1;308732;309401;1.096E-163;585;679;79.400;Wolbachia endosymbiont of Culex quinquefasciatus Pel;AM999887.1;305804;306292;4.982E-63;251;492;71.500;Wolbachia endosymbiont of Culex quinquefasciatus Pel;AM999887.1;304831;305669;2.866E-117;431;872;70.900;Wolbachia endosymbiont of Culex quinquefas…	99;1160;167;223	0.332155477031802;0.293573264781491;0.259183673469388;0.260919540229885	NA;35	NA;37	4
GAGA-0266.Scaffold449.0-34863	GAGA-0266	Ectomomyrmex cf. javanus	Ponerinae	PacBio	NA	NA	NA	NA	Scaffold449	0	34863	Scaffold449:2075-3900;Scaffold449:4067-6477;Scaffold449:6-642;Scaffold449:6590-9161	2075;4067;6;6590	3900;6477;642;9161	CP007597.1;1080001;1080549;2.398E-67;265;549;73.200;Stenotrophomonas rhizophila;CP003093.2;904972;905889;1.201E-271;943;935;82.700;Pseudoxanthomonas spadix BD-a59;CP002446.1;643729;644337;2.774E-39;172;609;69.800;Pseudoxanthomonas suwonensis 11-1;CP008714.1;3311918;3313324;0.000E+00;1567;1411;84.800;Xanthomonas translucens pv. undulosa	13132;64668;2183;153003	0.69041095890411;0.668464730290456;0.724842767295597;0.688448074679113	NA;0	NA;0	4
GAGA-0266.Scaffold967.2095-47498	GAGA-0266	Ectomomyrmex cf. javanus	Ponerinae	PacBio	NA	NA	NA	NA	Scaffold967	2095	47498	Scaffold967:22095-22379;Scaffold967:23531-25476;Scaffold967:26646-27498	22095;23531;26646	22379;25476;27498	CP003883.1;197863;198157;9.608E-22;113;295;67.300;Wolbachia endosymbiont of Drosophila simulans wNo;AM999887.1;308466;309401;1.888E-177;630;965;75.100;Wolbachia endosymbiont of Culex quinquefasciatus Pel;AM999887.1;305448;306292;6.195E-89;337;854;68.900;Wolbachia endosymbiont of Culex quinquefasciatus Pel	114;1186;246	0.313380281690141;0.281233933161954;0.264084507042254	23;27;16	23;8;16	3
GAGA-0266.Scaffold244.385310-417197	GAGA-0266	Ectomomyrmex cf. javanus	Ponerinae	PacBio	NA	NA	NA	NA	Scaffold244	385310	417197	Scaffold244:405310-405500;Scaffold244:408662-410288;Scaffold244:411404-413385	405310;408662;411404	405500;410288;413385	CP003884.1;860838;860953;3.849E-10;75;116;74.100;Wolbachia endosymbiont of Drosophila simulans wHa;AM999887.1;304704;305927;2.738E-158;567;1260;70.500;Wolbachia endosymbiont of Culex quinquefasciatus Pel;AM999887.1;307460;309015;5.956E-225;788;1598;71.000;Wolbachia endosymbiont of Culex quinquefasciatus Pel	232;416;1311	0.231578947368421;0.274292742927429;0.298334174659263	NA;239;170	NA;194;13	3
GAGA-0266.Scaffold166.565001-610616	GAGA-0266	Ectomomyrmex cf. javanus	Ponerinae	PacBio	NA	NA	NA	NA	Scaffold166	565001	610616	Scaffold166:585001-586854;Scaffold166:587115-589081;Scaffold166:590346-590616	585001;587115;590346	586854;589081;590616	AM999887.1;305362;307206;8.665E-206;724;1855;69.200;Wolbachia endosymbiont of Culex quinquefasciatus Pel;AM999887.1;307490;308820;3.024E-188;666;1385;70.500;Wolbachia endosymbiont of Culex quinquefasciatus Pel;CP003884.1;1280492;1280638;1.111E-10;77;167;70.600;Wolbachia endosymbiont of Drosophila simulans wHa	525;1072;164	0.263356718834323;0.281281790437436;0.292592592592593	NA	NA	3
GAGA-0266.Scaffold317.62414-107151	GAGA-0266	Ectomomyrmex cf. javanus	Ponerinae	PacBio	NA	Wolbachia	Rickettsiales	Alphaproteobacteria	Scaffold317	62414	107151	Scaffold317:82414-84358;Scaffold317:85541-87151	82414;85541	84358;87151	AM999887.1;308816;309403;4.927E-148;533;588;80.300;Wolbachia endosymbiont of Culex quinquefasciatus Pel;AM999887.1;304723;306292;1.133E-173;618;1612;68.800;Wolbachia endosymbiont of Culex quinquefasciatus Pel	1297;472	0.298868312757202;0.251552795031056	27;24	28;24	2
GAGA-0288.Scaffold54.1081840-1168951	GAGA-0288	Temnothorax unifasciatus	Myrmicinae	PacBio	ATP-dependent_RNA_helicase_RhlB;ankyrin_repeat_protein	Wolbachia	Rickettsiales	Alphaproteobacteria	Scaffold54	1081840	1168951	Scaffold54:1101840-1102248;Scaffold54:1102502-1106000;Scaffold54:1107004-1109646;Scaffold54:1119840-1120519;Scaffold54:1120793-1124436;Scaffold54:1125001-1127074;Scaffold54:1128380-1128679;Scaffold54:1128979-1129675;Scaffold54:1130141-1132993;Scaffold54:1134001-1137481;Scaffold54:1140265-1141202;Scaffold54:1141546-1143492;Scaffold54:1144511-1146988;Scaffold54:1147510-1148951	1101840;1102502;1107004;1119840;1120793;1125001;1128380;1128979;1130141;1134001;1140265;1141546;1144511;1147510	1102248;1106000;1109646;1120519;1124436;1127074;1128679;1129675;1132993;1137481;1141202;1143492;1146988;1148951	CP001391.1;1302000;1302410;6.195E-89;337;411;78.600;Wolbachia sp. wRi;CP001391.1;741906;743893;0.000E+00;1935;2000;81.700;Wolbachia sp. wRi;CP001391.1;746495;748495;0.000E+00;1972;2001;82.000;Wolbachia sp. wRi;AP013028.1;762508;763147;1.923E-92;348;640;72.300;Wolbachia endosymbiont of Cimex lectularius;CP001391.1;741737;743442;0.000E+00;1479;1706;79.600;Wolbachia sp. wRi;CP001391.1;745897;747886;…	932;345;170;1179;362;236;329;491;230;354;2608;131;220;67	0.352941176470588;0.335620354488279;0.29333838001514;0.304860088365243;0.337084820203129;0.314520019295707;0.284280936454849;0.285919540229885;0.327138849929874;0.314942528735632;0.313767342582711;0.322199383350462;0.338312474767864;0.299791811242193	NA;116	NA;97	14
GAGA-0288.Scaffold1.1010986-1052334	GAGA-0288	Temnothorax unifasciatus	Myrmicinae	PacBio	NA	Spiroplasma_mirum_AT	Entoplasmatales	Mollicutes	Scaffold1	1010986	1052334	Scaffold1:1032041-1032334	1032041	1032334	CP002082.1;504977;505150;1.386E-36;163;174;81.400;Spiroplasma mirum ATCC 29335	728	0.235494881	61	60	1
GAGA-0288.Scaffold110.60331-100684	GAGA-0288	Temnothorax unifasciatus	Myrmicinae	PacBio	NA	Wolbachia	Rickettsiales	Alphaproteobacteria	Scaffold110	60331	100684	Scaffold110:80331-80684	80331	80684	CP001391.1;742713;743068;1.198E-47;199;356;73.500;Wolbachia sp. wRi	200	0.291784703	NA	NA	1
GAGA-0288.Scaffold75.639616-680500	GAGA-0288	Temnothorax unifasciatus	Myrmicinae	PacBio	Phosphocholine_transferase_AnkX	Wolbachia	Rickettsiales	Alphaproteobacteria	Scaffold75	639616	680500	Scaffold75:659616-660500	659616	660500	CP001391.1;744406;745288;7.557E-183;648;886;76.300;Wolbachia sp. wRi	585	0.319004525	NA	NA	1
GAGA-0288.Scaffold13.4134918-4176109	GAGA-0288	Temnothorax unifasciatus	Myrmicinae	PacBio	Lysozyme_M1	Wolbachia	Rickettsiales	Alphaproteobacteria	Scaffold13	4134918	4176109	Scaffold13:4154918-4155599;Scaffold13:4155958-4156109	4154918;4155958	4155599;4156109	CP001391.1;1355365;1355948;1.988E-119;438;584;76.900;Wolbachia sp. wRi;AM999887.1;1383150;1383274;2.147E-20;109;125;79.200;Wolbachia endosymbiont of Culex quinquefasciatus Pel	1710;603	0.368575624082232;0.278145695364238	NA	NA	2
GAGA-0288.Scaffold153.0-28379	GAGA-0288	Temnothorax unifasciatus	Myrmicinae	PacBio	NA	NA	NA	NA	Scaffold153	0	28379	Scaffold153:6013-6080;Scaffold153:7957-8379	6013;7957	6080;8379	AM999887.1;1471843;1471911;9.256E-12;80;69;85.500;Wolbachia endosymbiont of Culex quinquefasciatus Pel;AM999887.1;298596;299017;4.298E-91;344;424;77.700;Wolbachia endosymbiont of Culex quinquefasciatus Pel	162;693	0.253731343283582;0.312796208530806	NA;5	NA;5	2
GAGA-0288.Scaffold75.626615-688393	GAGA-0288	Temnothorax unifasciatus	Myrmicinae	PacBio	ankyrin_repeat_protein	Wolbachia	Rickettsiales	Alphaproteobacteria	Scaffold75	626615	688393	Scaffold75:646615-647035;Scaffold75:647421-647586;Scaffold75:653820-654216;Scaffold75:654544-657229;Scaffold75:661501-663492;Scaffold75:667503-668393	646615;647421;653820;654544;661501;667503	647035;647586;654216;657229;663492;668393	CP003883.1;715783;716163;8.941E-53;216;387;73.700;Wolbachia endosymbiont of Drosophila simulans wNo;CP001391.1;741724;741884;8.613E-26;127;167;77.200;Wolbachia sp. wRi;AM999887.1;1148074;1148417;2.312E-40;175;344;72.300;Wolbachia endosymbiont of Culex quinquefasciatus Pel;CP001391.1;741737;743162;0.000E+00;1153;1428;78.400;Wolbachia sp. wRi;CP001391.1;746186;748130;0.000E+00;1687;1993;78.900;Wolb…	1265;128;938;230;262;74	0.34047619047619;0.248484848484848;0.285353535353535;0.319553072625698;0.275740833751883;0.28876404494382	NA;32	NA;18	6
GAGA-0300.Scaffold510.0-34127	GAGA-0300	Ectomomyrmex javanus	Ponerinae	PacBio	NA	NA	NA	NA	Scaffold510	0	34127	Scaffold510:11580-11900;Scaffold510:13575-14127	11580;13575	11900;14127	AM999887.1;305992;306292;8.004E-23;117;322;67.800;Wolbachia endosymbiont of Culex quinquefasciatus Pel;AM999887.1;308835;309276;1.242E-57;233;442;72.200;Wolbachia endosymbiont of Culex quinquefasciatus Pel	118;579	0.246875;0.300724637681159	52;37	52;39	2
GAGA-0300.Scaffold46.1350471-1394152	GAGA-0300	Ectomomyrmex javanus	Ponerinae	PacBio	NA	NA	NA	NA	Scaffold46	1350471	1394152	Scaffold46:1370471-1372263;Scaffold46:1372631-1374152	1370471;1372631	1372263;1374152	AM999887.1;308401;309401;2.097E-190;673;1031;74.700;Wolbachia endosymbiont of Culex quinquefasciatus Pel;AM999887.1;305735;307238;2.041E-163;584;1523;68.900;Wolbachia endosymbiont of Culex quinquefasciatus Pel	1250;215	0.29296875;0.27284681130835	NA	NA	2
GAGA-0300.Scaffold13.305564-355000	GAGA-0300	Ectomomyrmex javanus	Ponerinae	PacBio	NA	NA	NA	NA	Scaffold13	305564	355000	Scaffold13:325564-325862;Scaffold13:326566-327547;Scaffold13:328501-335000	325564;326566;328501	325862;327547;335000	AP013028.1;756050;756344;2.228E-30;142;300;71.400;Wolbachia endosymbiont of Cimex lectularius;CP001391.1;741450;742363;2.726E-297;1028;934;84.300;Wolbachia sp. wRi;CP001391.1;742192;744192;0.000E+00;3013;2001;93.600;Wolbachia sp. wRi	143;450;610	0.352348993288591;0.295616717635066;0.335897830435452	47;37;124	47;69;55	3
GAGA-0300.Scaffold13.0-101784	GAGA-0300	Ectomomyrmex javanus	Ponerinae	PacBio	NA	NA	NA	NA	Scaffold13	0	101784	Scaffold13:63686-65317;Scaffold13:66500-68439;Scaffold13:78600-79266;Scaffold13:80211-81784	63686;66500;78600;80211	65317;68439;79266;81784	AM999887.1;304699;305923;2.738E-158;567;1261;70.600;Wolbachia endosymbiont of Culex quinquefasciatus Pel;AM999887.1;307494;308936;9.309E-209;734;1477;71.100;Wolbachia endosymbiont of Culex quinquefasciatus Pel;AM999887.1;305992;306652;3.097E-69;271;668;69.000;Wolbachia endosymbiont of Culex quinquefasciatus Pel;AM999887.1;307848;309117;1.733E-208;733;1291;72.300;Wolbachia endosymbiont of Culex qu…	343;1066;143;1019	0.27958307786634;0.287777204744714;0.292792792792793;0.293706293706294	69;63;17	77;45;61;26	4
GAGA-0300.Scaffold90.638787-686185	GAGA-0300	Ectomomyrmex javanus	Ponerinae	PacBio	NA	NA	NA	NA	Scaffold90	638787	686185	Scaffold90:658787-660733;Scaffold90:661899-663499;Scaffold90:665916-666185	658787;661899;665916	660733;663499;666185	AM999887.1;309186;309400;1.791E-55;225;215;83.200;Wolbachia endosymbiont of Culex quinquefasciatus Pel;AM999887.1;304733;306292;1.074E-214;754;1602;71.200;Wolbachia endosymbiont of Culex quinquefasciatus Pel;CP001391.1;111610;111864;4.627E-26;128;271;71.400;Wolbachia sp. wRi	1239;498;178	0.301644398766701;0.263125;0.245353159851301	163;191;NA	183;200;NA	3
GAGA-0300.Scaffold491.57777-105499	GAGA-0300	Ectomomyrmex javanus	Ponerinae	PacBio	NA	NA	NA	NA	Scaffold491	57777	105499	Scaffold491:77777-78047;Scaffold491:79312-81278;Scaffold491:81539-83000;Scaffold491:84004-85499	77777;79312;81539;84004	78047;81278;83000;85499	AM999887.1;498992;499251;4.142E-13;85;260;68.500;Wolbachia endosymbiont of Culex quinquefasciatus Pel;AM999887.1;308732;309403;9.487E-158;565;681;78.700;Wolbachia endosymbiont of Culex quinquefasciatus Pel;AM999887.1;305748;307206;1.471E-158;568;1463;69.200;Wolbachia endosymbiont of Culex quinquefasciatus Pel;AM999887.1;303255;304772;1.485E-280;973;1518;74.100;Wolbachia endosymbiont of Culex quin…	164;1239;255;527	0.292592592592593;0.281790437436419;0.266255989048597;0.25752508361204	NA;27	NA;28	4
GAGA-0300.Scaffold95.854885-900984	GAGA-0300	Ectomomyrmex javanus	Ponerinae	PacBio	NA	NA	NA	NA	Scaffold95	854885	900984	Scaffold95:874885-875169;Scaffold95:876321-878267;Scaffold95:879062-880984	874885;876321;879062	875169;878267;880984	CP003883.1;197863;198157;2.147E-20;109;295;66.900;Wolbachia endosymbiont of Drosophila simulans wNo;AM999887.1;307757;309401;5.445E-300;1037;1681;74.000;Wolbachia endosymbiont of Culex quinquefasciatus Pel;AM999887.1;304780;306658;2.773E-219;769;1924;69.400;Wolbachia endosymbiont of Culex quinquefasciatus Pel	110;1367;501	0.313380281690141;0.281603288797533;0.279916753381894	53;56;76	53;71;74	3
GAGA-0300.Scaffold3.9297222-9352831	GAGA-0300	Ectomomyrmex javanus	Ponerinae	PacBio	NA	NA	NA	NA	Scaffold3	9297222	9352831	Scaffold3:9317222-9318092;Scaffold3:9319904-9321848;Scaffold3:9327010-9328410;Scaffold3:9329622-9331573;Scaffold3:9332650-9332831	9317222;9319904;9327010;9329622;9332650	9318092;9321848;9328410;9331573;9332831	AM999887.1;304831;305669;3.441E-116;427;872;70.800;Wolbachia endosymbiont of Culex quinquefasciatus Pel;AM999887.1;307494;309051;2.149E-217;763;1594;70.700;Wolbachia endosymbiont of Culex quinquefasciatus Pel;AM999887.1;304924;306292;1.951E-187;664;1402;71.200;Wolbachia endosymbiont of Culex quinquefasciatus Pel;AM999887.1;307490;308323;1.988E-119;438;834;71.800;Wolbachia endosymbiont of Culex qu…	89;1104;319;1321;86	0.263218390804598;0.290637860082305;0.273571428571429;0.284469502819067;0.331491712707182	NA;53;27;22	NA;45;25;33	5
GAGA-0301.Scaffold464.0-36491	GAGA-0301	Anochetus risii	Ponerinae	PacBio	NA	NA	NA	NA	Scaffold464	0	36491	Scaffold464:10658-11097;Scaffold464:113-1627;Scaffold464:16049-16491;Scaffold464:3883-5410;Scaffold464:7420-7655;Scaffold464:9395-9663	10658;113;16049;3883;7420;9395	11097;1627;16491;5410;7655;9663	CP003548.1;1111197;1111474;1.723E-11;79;281;66.900;Nostoc sp. PCC 7107;CP003646.1;4838139;4839611;0.000E+00;1314;1494;79.700;Gloeocapsa sp. PCC 7428;CP001344.1;1130796;1131037;7.165E-10;74;243;67.600;Cyanothece sp. PCC 7425;CP000878.1;342662;343780;3.621E-309;1068;1119;81.600;Prochlorococcus marinus str. MIT 9211;CP002690.1;500717;500919;1.662E-18;103;203;71.900;Thermodesulfobium narugense DSM 14…	380;102289;796;133286;9040;203	0.38496583143508;0.533025099075297;0.470588235294118;0.546823837590046;0.417021276595745;0.384328358208955	7;NA;6	6;NA	6
GAGA-0301.Scaffold231.0-100000	GAGA-0301	Anochetus risii	Ponerinae	PacBio	NA	NA	NA	NA	Scaffold231	0	100000	Scaffold231:15593-36101;Scaffold231:3105-4682;Scaffold231:36263-36864;Scaffold231:38583-41080;Scaffold231:41835-42670;Scaffold231:47646-57426;Scaffold231:58302-61934;Scaffold231:6001-7128;Scaffold231:68345-72409;Scaffold231:7275-8767;Scaffold231:73956-76519;Scaffold231:76661-77309;Scaffold231:78305-78749;Scaffold231:78918-80000	15593;3105;36263;38583;41835;47646;58302;6001;68345;7275;73956;76661;78305;78918	36101;4682;36864;41080;42670;57426;61934;7128;72409;8767;76519;77309;78749;80000	CP003884.1;1089469;1090000;5.114E-236;825;539;94.000;Wolbachia endosymbiont of Drosophila simulans wHa;AM999887.1;1117331;1117741;4.147E-81;311;411;76.600;Wolbachia endosymbiont of Culex quinquefasciatus Pel;CP003884.1;884914;884977;2.068E-10;76;64;85.900;Wolbachia endosymbiont of Drosophila simulans wHa;CP003884.1;133232;134150;0.000E+00;1509;919;96.600;Wolbachia endosymbiont of Drosophila simul…	200105;2837;8575;77209;5521;130262;36245;6561;30586;14788;26158;2098;1307;9797	0.34952213770236;0.320228281547242;0.339434276206323;0.346816179415298;0.339328537170264;0.370040899795501;0.337279735682819;0.34072759538598;0.330708661417323;0.343163538873995;0.344127975029263;0.319444444444444;0.355855855855856;0.339186691312384	NA;26;15;0;17	NA;26;10;0;16	14
GAGA-0301.Scaffold47.2083192-2180659	GAGA-0301	Anochetus risii	Ponerinae	PacBio	NA	NA	NA	NA	Scaffold47	2083192	2180659	Scaffold47:2103192-2104998;Scaffold47:2105145-2107872;Scaffold47:2115336-2119309;Scaffold47:2119721-2121853;Scaffold47:2127903-2140985;Scaffold47:2149870-2150586;Scaffold47:2150748-2151349;Scaffold47:2160193-2162673;Scaffold47:2163419-2165793;Scaffold47:2165910-2180659	2103192;2105145;2115336;2119721;2127903;2149870;2150748;2160193;2163419;2165910	2104998;2107872;2119309;2121853;2140985;2150586;2151349;2162673;2165793;2180659	AE017321.1;23908;24210;1.788E-89;338;310;84.200;Wolbachia endosymbiont strain TRS of Brugia malayi;CP003884.1;1086646;1087988;0.000E+00;2239;1357;96.600;Wolbachia endosymbiont of Drosophila simulans wHa;CP001391.1;1369427;1369592;1.857E-65;259;166;94.500;Wolbachia sp. wRi;CP001391.1;1373423;1373866;2.601E-199;703;444;95.200;Wolbachia sp. wRi;CP003884.1;626583;627682;0.000E+00;1594;1100;92.300;Wol…	18873;14985;36493;19152;143677;1722;9833;73918;13415;174139	0.326688815060908;0.327832783278328;0.356154039768437;0.379924953095685;0.344060541201651;0.35195530726257;0.339434276206323;0.345967741935484;0.318871103622578;0.370669197911723	NA;10;15	NA;12;27	10
GAGA-0302.Scaffold110.334133-374326	GAGA-0302	Ochetellus glaber	Dolichoderinae	PacBio	Ribose-5-phosphate_isomerase_A	Blochmannia	Enterobacterales	Gammaproteobacteria	Scaffold110	334133	374326	Scaffold110:354133-354326	354133	354326	CP010049.1;293529;293723;7.720E-30;140;195;75.800;Blochmannia endosymbiont of Camponotus (Colobopsis) obliquus	282	0.393782383	33	33	1
GAGA-0302.Scaffold111.377327-417544	GAGA-0302	Ochetellus glaber	Dolichoderinae	PacBio	10_kDa_chaperonin_2	Buchnera_aphidicola	Enterobacterales	Gammaproteobacteria	Scaffold111	377327	417544	Scaffold111:397327-397544	397327	397544	BA000003.2;18416;18628;2.071E-27;132;213;73.700;Buchnera aphidicola str. APS (Acyrthosiphon pisum)	3043	0.410138249	32	32	1
GAGA-0302.Scaffold119.31017-71338	GAGA-0302	Ochetellus glaber	Dolichoderinae	PacBio	Protein_translocase_subunit_SecA	Hafnia_alvei_FB1	Enterobacterales	Gammaproteobacteria	Scaffold119	31017	71338	Scaffold119:51017-51338	51017	51338	CP009706.1;3936876;3937140;9.977E-49;203;265;76.900;Hafnia alvei FB1	38288	0.339563863	50	43	1
GAGA-0302.Scaffold162.104596-144762	GAGA-0302	Ochetellus glaber	Dolichoderinae	PacBio	Protein_QmcA	Mannheimia_haemolytica	Pasteurellaceae	Gammaproteobacteria	Scaffold162	104596	144762	Scaffold162:124596-124762	124596	124762	CP005383.1;1360099;1360260;3.211E-28;135;162;78.300;Mannheimia haemolytica M42548	1513	0.319277108	NA	NA	1
GAGA-0302.Scaffold18.2387113-2427362	GAGA-0302	Ochetellus glaber	Dolichoderinae	PacBio	NA	NA	NA	NA	Scaffold18	2387113	2427362	Scaffold18:2407113-2407362	2407113	2407362	AP008232.1;3929471;3929717;6.673E-41;177;247;76.100;Sodalis glossinidius str. 'morsitans'	890	0.325301205	55	53	1
GAGA-0302.Scaffold187.714-40890	GAGA-0302	Ochetellus glaber	Dolichoderinae	PacBio	NA	NA	NA	NA	Scaffold187	714	40890	Scaffold187:20714-20890	20714	20890	AP014521.1;705866;706042;5.764E-35;157;177;79.600;Candidatus Tachikawaea gelatinosa	1124	0.340909091	55	55	1
GAGA-0302.Scaffold230.39416-79647	GAGA-0302	Ochetellus glaber	Dolichoderinae	PacBio	DNA_recombination_protein_RmuC	Baumannia_cicadellin	Enterobacterales	Gammaproteobacteria	Scaffold230	39416	79647	Scaffold230:59416-59647	59416	59647	CP000238.1;26152;26382;8.938E-36;160;231;75.300;Baumannia cicadellinicola str. Hc (Homalodisca coagulata)	1017	0.393939394	43	30	1
GAGA-0302.Scaffold406.0-16775	GAGA-0302	Ochetellus glaber	Dolichoderinae	PacBio	NA	NA	NA	NA	Scaffold406	0	16775	Scaffold406:14472-14650	14472	14650	CP002243.1;46739;46913;1.437E-29;139;180;78.400;Candidatus Moranella endobia PCIT	725	0.421348315	25	23	1
GAGA-0302.Scaffold5.8228892-8269094	GAGA-0302	Ochetellus glaber	Dolichoderinae	PacBio	NA	NA	NA	NA	Scaffold5	8228892	8269094	Scaffold5:8248892-8249094	8248892	8249094	AP012554.1;349593;349790;3.455E-31;145;198;76.800;Candidatus Pantoea carbekii	777	0.336633663	NA	NA	1
GAGA-0302.Scaffold59.449279-489471	GAGA-0302	Ochetellus glaber	Dolichoderinae	PacBio	NA	NA	NA	NA	Scaffold59	449279	489471	Scaffold59:469279-469471	469279	469471	CP003546.1;969229;969414;9.972E-32;147;186;77.400;secondary endosymbiont of Ctenarytaina eucalypti	4100	0.364583333	36	36	1
GAGA-0302.Scaffold59.932438-972794	GAGA-0302	Ochetellus glaber	Dolichoderinae	PacBio	DNA_gyrase_subunit_A	Yersinia_pestis_KIM1	Enterobacterales	Gammaproteobacteria	Scaffold59	932438	972794	Scaffold59:952438-952794	952438	952794	AE009952.1;3274999;3275348;1.998E-51;212;350;73.400;Yersinia pestis KIM10+	11166	0.382022472	59	57	1
GAGA-0302.Scaffold63.0-22598	GAGA-0302	Ochetellus glaber	Dolichoderinae	PacBio	NA	NA	NA	NA	Scaffold63	0	22598	Scaffold63:2416-2598	2416	2598	CP000826.1;4061696;4061879;1.197E-30;143;184;77.100;Serratia proteamaculans 568	217	0.423076923	NA	NA	1
GAGA-0302.Scaffold14.3510821-3551621	GAGA-0302	Ochetellus glaber	Dolichoderinae	PacBio	Ubiquinol-cytochrome_c_reductase_iron-sulfur_subunit	Wolbachia	Rickettsiales	Alphaproteobacteria	Scaffold14	3510821	3551621	Scaffold14:3530821-3530997;Scaffold14:3531182-3531621	3530821;3531182	3530997;3531621	AE017321.1;527126;527312;1.035E-41;180;187;81.800;Wolbachia endosymbiont strain TRS of Brugia malayi;AE017321.1;332865;333013;3.329E-21;112;149;78.200;Wolbachia endosymbiont strain TRS of Brugia malayi	482;510	0.397727272727273;0.287015945330296	NA	NA	2
GAGA-0302.Scaffold112.362218-413535	GAGA-0302	Ochetellus glaber	Dolichoderinae	PacBio	NA	NA	NA	NA	Scaffold112	362218	413535	Scaffold112:382218-382290;Scaffold112:393353-393535	382218;393353	382290;393535	CP012608.1;1111682;1111755;2.068E-10;76;74;82.400;Acinetobacter sp. TTH0-4;CP002243.1;46739;46921;8.307E-33;150;184;79.600;Candidatus Moranella endobia PCIT	77;1448	0.527777777777778;0.428571428571429	NA;34	NA;35	2
GAGA-0303.Scaffold38.0-69612	GAGA-0303	Harpegnathos venator	Ponerinae	PacBio	NA	NA	NA	NA	Scaffold38	0	69612	Scaffold38:1-1189;Scaffold38:10866-11395;Scaffold38:11573-12450;Scaffold38:12623-15628;Scaffold38:1501-7995;Scaffold38:16045-21511;Scaffold38:21762-26111;Scaffold38:27059-31261;Scaffold38:31370-32143;Scaffold38:32356-32692;Scaffold38:33069-41530;Scaffold38:41743-49612;Scaffold38:8275-10682	1;10866;11573;12623;1501;16045;21762;27059;31370;32356;33069;41743;8275	1189;11395;12450;15628;7995;21511;26111;31261;32143;32692;41530;49612;10682	CP002449.1;1568256;1568758;1.188E-132;482;503;81.700;Alicycliphilus denitrificans BC;CP000884.1;3143544;3144044;2.392E-101;378;513;78.200;Delftia acidovorans SPH-1;CP001220.2;1997025;1997894;2.919E-256;892;879;84.700;Comamonas thiooxydans;CP000076.1;3936635;3936935;1.437E-29;139;302;72.400;Pseudomonas protegens Pf-5;CP001220.2;1985321;1987121;0.000E+00;1738;1803;81.200;Comamonas thiooxydans;AE015…	24967;4782;893;7548;41496;209262;116978;76738;2041;477;134842;326905;38210	0.611111111111111;0.550094517958412;0.578107183580388;0.590682196339434;0.624730520480444;0.64306622758873;0.582892618992872;0.6573060447406;0.645536869340233;0.619047619047619;0.618484812669897;0.603126191383912;0.589945990859992	NA	NA	13
GAGA-0304.Scaffold111.91678-132272	GAGA-0304	Proformica cf. mongolica	Formicinae	PacBio	NA	NA	NA	NA	Scaffold111	91678	132272	Scaffold111:111678-112272	111678	112272	CP003866.1;49398;49863;1.335E-26;130;466;66.800;Borreliella garinii NMJW1	868	0.271043771	NA	NA	1
GAGA-0304.Scaffold4.198245-246054	GAGA-0304	Proformica cf. mongolica	Formicinae	PacBio	NA	NA	NA	NA	Scaffold4	198245	246054	Scaffold4:218245-225500;Scaffold4:225685-226054	218245;225685	225500;226054	CP001391.1;747879;749147;0.000E+00;1412;1269;84.900;Wolbachia sp. wRi;CP001391.1;740690;741059;1.072E-85;326;371;79.800;Wolbachia sp. wRi	904;327	0.311647139903515;0.300813008130081	NA	NA	2
GAGA-0304.Scaffold74.374948-446141	GAGA-0304	Proformica cf. mongolica	Formicinae	PacBio	NA	NA	NA	NA	Scaffold74	374948	446141	Scaffold74:394948-395768;Scaffold74:396694-399500;Scaffold74:399767-421777;Scaffold74:422711-423810;Scaffold74:423982-424872;Scaffold74:425019-425868;Scaffold74:427393-427561;Scaffold74:430575-432614;Scaffold74:433125-437755;Scaffold74:438299-439083;Scaffold74:440445-446141	394948;396694;399767;422711;423982;425019;427393;430575;433125;438299;440445	395768;399500;421777;423810;424872;425868;427561;432614;437755;439083;446141	CU928163.2;916702;917522;5.347E-100;373;822;72.000;Escherichia coli UMN026;CP000026.1;2511866;2512183;8.000E-91;343;318;83.900;Salmonella enterica subsp. enterica serovar Paratyphi A str. ATCC 9150;CP000880.1;2580542;2581024;2.857E-134;487;483;82.900;Salmonella enterica subsp. arizonae serovar 62:z4,z23:-;CP000036.1;1041959;1042253;9.976E-66;259;296;79.700;Shigella boydii Sb227;FN543502.1;3850823…	374;22362;317388;14867;6306;12551;2100;23384;64880;1834;49689	0.469512195121951;0.483250178189594;0.550159018627896;0.580527752502275;0.541573033707865;0.484098939929329;0.482142857142857;0.440411966650319;0.470626349892009;0.471938775510204;0.484375	0;NA;147	0;NA;127	11
GAGA-0306.Scaffold209.0-53396	GAGA-0306	Stictoponera bicolor	Ectatomminae	PacBio	NA	NA	NA	NA	Scaffold209	0	53396	Scaffold209:10347-10541;Scaffold209:16860-17415;Scaffold209:28295-28519;Scaffold209:30936-31107;Scaffold209:32126-32374;Scaffold209:32744-32941;Scaffold209:33942-34046;Scaffold209:42586-42795;Scaffold209:44782-45010	10347;16860;28295;30936;32126;32744;33942;42586;44782	10541;17415;28519;31107;32374;32941;34046;42795;45010	CR767821.1;855329;855524;5.554E-25;124;196;73.900;Ehrlichia ruminantium str. Welgevonden;CP003809.1;501004;501556;7.445E-37;164;553;68.000;alpha proteobacterium HIMB5;AP013028.1;598171;598353;1.662E-18;103;184;73.500;Wolbachia endosymbiont of Cimex lectularius;CP000896.1;77046;77216;4.621E-09;71;173;69.300;Acholeplasma laidlawii PG-8A;CP012640.2;3121523;3121770;5.969E-11;78;250;69.600;Massilia sp…	58;180;3016;645;79;568;518;439;5587	0.262886597938144;0.29009009009009;0.419642857142857;0.444444444444444;0.362903225806452;0.345177664974619;0.307692307692308;0.373205741626794;0.394736842105263	NA;52	NA;52	9
GAGA-0306.Scaffold73.50937-136125	GAGA-0306	Stictoponera bicolor	Ectatomminae	PacBio	NA	NA	NA	NA	Scaffold73	50937	136125	Scaffold73:105920-106074;Scaffold73:111808-113000;Scaffold73:114159-115057;Scaffold73:115780-116125;Scaffold73:70937-71000;Scaffold73:71713-72818;Scaffold73:74425-77576	105920;111808;114159;115780;70937;71713;74425	106074;113000;115057;116125;71000;72818;77576	CP001391.1;741128;741286;1.336E-43;186;159;86.100;Wolbachia sp. wRi;CP001391.1;740211;741404;0.000E+00;1580;1194;89.500;Wolbachia sp. wRi;CP001391.1;737525;738257;1.401E-260;906;775;85.400;Wolbachia sp. wRi;AM999887.1;1087649;1087982;3.718E-68;268;346;77.000;Wolbachia endosymbiont of Culex quinquefasciatus Pel;AM999887.1;361584;361648;1.196E-13;87;65;89.200;Wolbachia endosymbiont of Culex quinque…	81;884;319;1397;388;7195;33343	0.344155844155844;0.340604026845638;0.298440979955457;0.382608695652174;0.380952380952381;0.31131221719457;0.349095525230086	NA;29;23;16;35	NA;32;21;18;40	7
GAGA-0306.Scaffold2.12243682-13193904	GAGA-0306	Stictoponera bicolor	Ectatomminae	PacBio	NA	NA	NA	NA	Scaffold2	12243682	13193904	Scaffold2:12263682-12264400;Scaffold2:12264513-12266308;Scaffold2:12267713-12268661;Scaffold2:12276590-12280999;Scaffold2:12282161-12282302;Scaffold2:12283437-12286102;Scaffold2:12286325-12287219;Scaffold2:12288718-12290271;Scaffold2:12291261-12292771;Scaffold2:12293444-12294500;Scaffold2:12295416-12296478;Scaffold2:12297014-12297136;Scaffold2:12297244-12298988;Scaffold2:12300378-12300832;Scaffol…	12263682;12264513;12267713;12276590;12282161;12283437;12286325;12288718;12291261;12293444;12295416;12297014;12297244;12300378;12300979;12301550;12309046;12317931;12319399;12320624;12323411;12325004;12326746;12327972;12328772;12331691;12337501;12339930;12343242;12345799;12348074;12351194;12355263;12362907;12363446;12366620;12370040;12371729;12372245;12373273;12375208;12376817;12378034;12378978;123…	12264400;12266308;12268661;12280999;12282302;12286102;12287219;12290271;12292771;12294500;12296478;12297136;12298988;12300832;12301409;12304111;12314097;12319079;12319505;12321131;12324778;12326006;12327775;12328321;12331449;12334811;12338941;12340848;12344167;12347371;12349944;12354476;12358875;12363232;12365888;12369125;12370500;12372093;12372979;12373368;12375973;12377021;12378375;12380551;123…	CP011856.1;703067;703685;1.195E-98;369;619;73.700;Spiroplasma eriocheiris;CP006681.1;1100210;1100918;1.664E-69;272;718;69.100;Spiroplasma culicicola AES-1;AE017263.1;92154;93103;4.613E-111;410;950;70.600;Mesoplasma florum L1;CP009415.1;123747;125014;1.014E-177;631;1268;71.500;Candidatus Izimaplasma sp. HR1;CP012622.1;23226;23342;3.207E-11;79;117;75.200;Spiroplasma cantharicola;CP000123.1;966542;9…	4105;3846;7482;298103;463;32447;20622;22903;2628;2691;25208;733;6014;865;707;6146;142184;22463;73;356;8632;4295;54458;280;19333;12603;31186;501;586;15913;32546;8188;7173;262;19026;9806;386;244;247;535;2490;720;568;34982;298;60736;189;4120;5719;17262;76167;712;35130;277;274771;9011;13738;36867;258;199267;29834;176;58511;14302;5454;12323;77;46283;495;2653;13116;197;6448;524;352;245;71;21238;24665;1…	0.353760445682451;0.351532033426184;0.378691983122363;0.386028577908823;0.297872340425532;0.351594746716698;0.333333333333333;0.368963296844816;0.303973509933775;0.327651515151515;0.282485875706215;0.327868852459016;0.318807339449541;0.312775330396476;0.283720930232558;0.278406872315502;0.349039794100178;0.31184668989547;0.424528301886792;0.276134122287968;0.288222384784199;0.377245508982036;0.32…	NA;1193;458;323;347;359;338;304;301;306;288;325;279;309;311;269;286;342;316;336;387;1077;382;381;361;291;246;298;282;297;292;277;305;308;340;236;268;321;313;439;280;252;289;293;299;263;258;217;234;241;331;278;300;324;296;260;248;212;199;216;242;247;226;235;225;294;192;285;256;1051;1008;991;237;267;264;265;290;810;839;328;283;787;295;334;456;281;356;897;896;273;335;326;284;372;339;368;115;1014;109…	NA;1182;304;337;353;360;333;309;306;299;326;302;315;300;280;294;340;316;378;367;388;379;391;349;310;265;274;298;285;292;301;303;317;240;279;334;375;275;276;243;284;288;281;271;738;229;237;346;267;295;320;254;256;248;214;219;217;242;291;238;253;262;239;249;227;198;277;235;1029;1020;286;283;251;264;269;290;330;882;411;308;297;321;651;282;273;266;236;445;322;967;247;327;270;305;370;345;362;319;1171;…	373
GAGA-0306.Scaffold70.147612-199707	GAGA-0306	Stictoponera bicolor	Ectatomminae	PacBio	ankyrin_repeat_protein	Wolbachia	Rickettsiales	Alphaproteobacteria	Scaffold70	147612	199707	Scaffold70:167612-175831;Scaffold70:177567-179707	167612;177567	175831;179707	CP001391.1;749125;750000;0.000E+00;1315;890;92.800;Wolbachia sp. wRi;CP001391.1;740694;742129;0.000E+00;2019;1436;91.200;Wolbachia sp. wRi	2929;1820	0.329237133471225;0.313551401869159	NA;34	NA;39	2
GAGA-0306.Scaffold1.17681654-17722504	GAGA-0306	Stictoponera bicolor	Ectatomminae	PacBio	Su+6_(supP)_amber_suppressor_transfer_RNA-Leu	Wolbachia	Rickettsiales	Alphaproteobacteria	Scaffold1	17681654	17722504	Scaffold1:17701654-17702504	17701654	17702504	AM999887.1;1043416;1043737;2.471E-128;467;324;92.200;Wolbachia endosymbiont of Culex quinquefasciatus Pel	9325	0.392941176	25	26	1
GAGA-0306.Scaffold215.7094-47617	GAGA-0306	Stictoponera bicolor	Ectatomminae	PacBio	NA	NA	NA	NA	Scaffold215	7094	47617	Scaffold215:27094-27617	27094	27617	CP000781.1;1885598;1885855;2.228E-30;142;265;75.500;Xanthobacter autotrophicus Py2	5328	0.625239006	NA	NA	1
GAGA-0306.Scaffold172.24245-71859	GAGA-0306	Stictoponera bicolor	Ectatomminae	PacBio	NA	NA	NA	NA	Scaffold172	24245	71859	Scaffold172:44245-44683;Scaffold172:51731-51859	44245;51731	44683;51859	CP001013.1;739445;739833;8.613E-26;127;419;67.500;Leptothrix cholodnii SP-6;CP009110.1;2752940;2753061;8.601E-09;70;130;74.000;Amycolatopsis methanolica 239	2752;71	0.678082191780822;0.734375	NA	NA	2
GAGA-0306.Scaffold369.0-18162	GAGA-0306	Stictoponera bicolor	Ectatomminae	PacBio	NA	NA	NA	NA	Scaffold369	0	18162	Scaffold369:5507-6031;Scaffold369:6167-6776;Scaffold369:8317-8637	5507;6167;8317	6031;6776;8637	CP000747.1;2222102;2222562;2.984E-25;125;479;67.000;Phenylobacterium zucineum HLK1;CP001281.2;2717459;2718032;7.445E-37;164;597;67.200;Thauera sp. MZ1T;CP007699.2;2448917;2449199;2.310E-23;119;285;71.400;Streptomyces lydicus	2975;2508;715	0.677480916030534;0.67816091954023;0.665625	NA;4	NA;4	3
GAGA-0306.Scaffold277.0-29167	GAGA-0306	Stictoponera bicolor	Ectatomminae	PacBio	NA	NA	NA	NA	Scaffold277	0	29167	Scaffold277:7054-8015;Scaffold277:8228-9375	7054;8228	8015;9375	CP001896.1;1180010;1180672;1.664E-69;272;666;70.100;Allochromatium vinosum DSM 180;CP002665.1;983006;983273;1.662E-18;103;277;71.200;Cellulomonas gilvus ATCC 13127	14806;5583	0.552549427679501;0.571926765475153	NA	NA	2
GAGA-0306.Scaffold70.76623-119754	GAGA-0306	Stictoponera bicolor	Ectatomminae	PacBio	Riboflavin_synthase	Wolbachia	Rickettsiales	Alphaproteobacteria	Scaffold70	76623	119754	Scaffold70:96623-98268;Scaffold70:98628-99462;Scaffold70:99599-99754	96623;98628;99599	98268;99462;99754	AP013028.1;951200;952237;0.000E+00;1628;1050;94.600;Wolbachia endosymbiont of Cimex lectularius;AM999887.1;362155;362993;2.967E-127;464;839;72.300;Wolbachia endosymbiont of Culex quinquefasciatus Pel;CP001391.1;10327;10480;4.802E-36;161;155;84.100;Wolbachia sp. wRi	7399;172;902	0.341641337386018;0.328537170263789;0.245161290322581	38;NA;35	36;NA;35	3
GAGA-0307.Scaffold17.5118154-5160217	GAGA-0307	Hypoponera opacior	Ponerinae	Curated using purge haplotigs	ATP-dependent_helicase/nuclease_subunit_A	Wolbachia	Rickettsiales	Alphaproteobacteria	Scaffold17	5118154	5160217	Scaffold17:5138154-5140217	5138154	5140217	AE017321.1;817067;818391;5.834E-259;901;1346;74.800;Wolbachia endosymbiont strain TRS of Brugia malayi	12330	0.319922443	48	46	1
GAGA-0328.Scaffold1.9828465-9868878	GAGA-0328	Carebara diversa	Myrmicinae	PacBio	Transposase_for_insertion_sequence_element_ISRM3	Wolbachia	Rickettsiales	Alphaproteobacteria	Scaffold1	9828465	9868878	Scaffold1:9848465-9848878	9848465	9848878	AM999887.1;1088034;1088301;2.880E-49;205;268;77.600;Wolbachia endosymbiont of Culex quinquefasciatus Pel	630	0.249394673	123	122	1
GAGA-0328.Scaffold17.616160-656366	GAGA-0328	Carebara diversa	Myrmicinae	PacBio	NA	Wolbachia	Rickettsiales	Alphaproteobacteria	Scaffold17	616160	656366	Scaffold17:636160-636366	636160	636366	AE017321.1;1017887;1018097;1.604E-42;182;211;80.800;Wolbachia endosymbiont strain TRS of Brugia malayi	366	0.233009709	111	108	1
GAGA-0328.Scaffold36.485675-526652	GAGA-0328	Carebara diversa	Myrmicinae	PacBio	Autolytic_lysozyme	Wolbachia	Rickettsiales	Alphaproteobacteria	Scaffold36	485675	526652	Scaffold36:505675-506652	505675	506652	CP003883.1;614723;615361;3.700E-119;437;639;75.400;Wolbachia endosymbiont of Drosophila simulans wNo	1333	0.324462641	101	105	1
GAGA-0330.Scaffold27.1859346-1911090	GAGA-0330	Crematogaster cf. rogenhoferi	Myrmicinae	PacBio	NA	NA	NA	NA	Scaffold27	1859346	1911090	Scaffold27:1879346-1881125;Scaffold27:1889323-1891090	1879346;1889323	1881125;1891090	CP003883.1;1188573;1189214;4.927E-148;533;642;78.700;Wolbachia endosymbiont of Drosophila simulans wNo;CP003883.1;1188573;1189755;3.006E-266;925;1183;77.500;Wolbachia endosymbiont of Drosophila simulans wNo	3673;4269	0.329960652051714;0.349179400113186	10;17	14;30	2
GAGA-0331.Scaffold1300.0-27081	GAGA-0331	Carebara sp. s2	Myrmicinae	stLFR	NA	NA	NA	NA	Scaffold1300	0	27081	Scaffold1300:10504-12833;Scaffold1300:6482-8312;Scaffold1300:13501-14680	10504;6482;13501	12833;8312;14680	CP001391.1;743798;745788;0.000E+00;2500;1994;87.700;Wolbachia sp. wRi;CP001391.1;741827;743353;0.000E+00;2185;1527;91.800;Wolbachia sp. wRi;CP001391.1;746428;747613;1.167E-305;1056;1186;79.900;Wolbachia sp. wRi	214;582;249	0.335337054529841;0.318032786885246;0.263782866836302	75;76;NA	73;65;NA	3
GAGA-0331.Scaffold2142.0-15276	GAGA-0331	Carebara sp. s2	Myrmicinae	stLFR	NA	NA	NA	NA	Scaffold2142	0	15276	Scaffold2142:3168-3557	3168	3557	CP003884.1;935415;935756;2.775E-73;285;342;78.700;Wolbachia endosymbiont of Drosophila simulans wHa	363	0.326478149	102	78	1
GAGA-0331.Scaffold2506.0-13344	GAGA-0331	Carebara sp. s2	Myrmicinae	stLFR	NA	NA	NA	NA	Scaffold2506	0	13344	Scaffold2506:5741-6367	5741	6367	CP003883.1;614723;615361;3.441E-116;427;639;74.800;Wolbachia endosymbiont of Drosophila simulans wNo	886	0.317891374	62	70	1
GAGA-0331.Scaffold3073.0-11424	GAGA-0331	Carebara sp. s2	Myrmicinae	stLFR	NA	NA	NA	NA	Scaffold3073	0	11424	Scaffold3073:7572-8258	7572	8258	AM999887.1;361350;362058;4.978E-80;307;709;70.700;Wolbachia endosymbiont of Culex quinquefasciatus Pel	3148	0.293002915	44	143	1
GAGA-0331.Scaffold413.929-41679	GAGA-0331	Carebara sp. s2	Myrmicinae	stLFR	NA	NA	NA	NA	Scaffold413	929	41679	Scaffold413:20929-21679	20929	21679	CP000494.1;4249065;4249591;2.149E-37;165;533;67.400;Bradyrhizobium sp. BTAi1	853	0.628	NA	NA	1
GAGA-0331.Scaffold506.13791-79367	GAGA-0331	Carebara sp. s2	Myrmicinae	stLFR	NA	NA	NA	NA	Scaffold506	13791	79367	Scaffold506:33791-34276;Scaffold506:34663-35069;Scaffold506:36023-37255;Scaffold506:59622-60484;Scaffold506:61928-62470;Scaffold506:75276-75778;Scaffold506:76649-78057	33791;34663;36023;59622;61928;75276;76649	34276;35069;37255;60484;62470;75778;78057	CP001391.1;737675;738171;2.483E-94;354;497;75.800;Wolbachia sp. wRi;CP001391.1;739581;739952;1.857E-48;202;408;71.000;Wolbachia sp. wRi;CP001391.1;740170;741373;1.065E-231;810;1234;74.400;Wolbachia sp. wRi;CP001391.1;740541;741380;9.171E-148;532;864;73.100;Wolbachia sp. wRi;CP001391.1;737699;738242;4.000E-71;277;544;60.200;Wolbachia sp. wRi;CP001391.1;737666;737893;1.790E-38;169;228;77.200;Wolbac…	93;140;424;345;64;139;282	0.249484536082474;0.300492610837438;0.331980519480519;0.324825986078886;0.248868778280543;0.254980079681275;0.339488636363636	30;44;67;58;52;158	29;31;41;110;0;53;65	7
GAGA-0331.Scaffold3478.0-10374	GAGA-0331	Carebara sp. s2	Myrmicinae	stLFR	NA	NA	NA	NA	Scaffold3478	0	10374	Scaffold3478:6559-6991;Scaffold3478:9526-10039	6559;9526	6991;10039	CP001391.1;740953;741380;5.359E-66;260;434;73.500;Wolbachia sp. wRi;CP001391.1;737722;738242;5.219E-101;376;521;76.100;Wolbachia sp. wRi	261;107	0.303240740740741;0.265107212475634	36;97	136;69	2
GAGA-0331.Scaffold2695.0-12557	GAGA-0331	Carebara sp. s2	Myrmicinae	stLFR	NA	NA	NA	NA	Scaffold2695	0	12557	Scaffold2695:7513-9070;Scaffold2695:6437-6719	7513;6437	9070;6719	AP013028.1;967212;968194;8.170E-169;602;986;73.400;Wolbachia endosymbiont of Cimex lectularius;AE017321.1;377452;377734;4.000E-37;165;284;74.200;Wolbachia endosymbiont strain TRS of Brugia malayi	7421;276	0.314065510597302;0.290780141843972	81;NA	85;NA	2
GAGA-0333.Scaffold8.1661954-1702103	GAGA-0333	Tetramorium bicarinatum	Myrmicinae	PacBio	NA	Wolbachia	Rickettsiales	Alphaproteobacteria	Scaffold8	1661954	1702103	Scaffold8:1681954-1682103	1681954	1682103	HE660029.1;846969;847117;6.202E-38;167;150;85.400;Wolbachia endosymbiont of Onchocerca ochengi	594	0.322147651	NA	NA	1
GAGA-0334.Scaffold131.17442-139764	GAGA-0334	Rossomyrmex quandratinodus	Formicinae	PacBio	NA	NA	NA	NA	Scaffold131	17442	139764	Scaffold131:103740-104013;Scaffold131:104180-104258;Scaffold131:108870-110558;Scaffold131:114334-114580;Scaffold131:115025-116003;Scaffold131:116740-118261;Scaffold131:118526-119132;Scaffold131:120354-121744;Scaffold131:122584-125103;Scaffold131:127244-128289;Scaffold131:130045-131478;Scaffold131:131584-133424;Scaffold131:136199-138022;Scaffold131:138611-138984;Scaffold131:139132-139638;Scaffold1…	103740;104180;108870;114334;115025;116740;118526;120354;122584;127244;130045;131584;136199;138611;139132;37442;39346;40693;43100;44634;46241;47465;48876;50908;51446;56252;57484;62590;63769;66276;68065;71655;75506;76314;78531;79612;82421;84208;86400;91864;94692;96095;97541;99352;99787	104013;104258;110558;114580;116003;118261;119132;121744;125103;128289;131478;133424;138022;138984;139638;38042;40183;40904;44113;45608;46674;47558;49443;51052;53565;56458;58044;63037;65171;66638;68159;73137;75586;77644;79456;80322;83553;85469;87321;92561;95479;97169;98088;99535;99878	CP006682.1;433659;433896;4.797E-19;105;238;70.200;Spiroplasma apis B31;CP003947.1;1653480;1653559;2.671E-12;82;80;82.500;Cyanobacterium aponinum PCC 10605;CP000123.1;310353;311465;1.189E-132;482;1113;70.400;Mycoplasma capricolum subsp. capricolum ATCC 27343;CP001668.1;338870;339114;1.662E-18;103;248;70.200;Mycoplasma mycoides subsp. capri str. GM12;CP003021.1;606059;606633;4.982E-46;194;578;68.30…	911;83;7297;268;5948;11746;11741;15702;26986;1402;50696;34350;72524;335;105;7807;16600;262;5782;101111;1794;751;150;16066;1182;3793;1834;6844;86;187;8502;72;5829;12678;8915;16157;2421;3930;11423;6824;29711;1919;163;71	0.296703296703297;0.371794871794872;0.32760663507109;0.308943089430894;0.321063394683027;0.314924391847469;0.34983498349835;0.323021582733813;0.350535926955141;0.299521531100478;0.357990230286113;0.348913043478261;0.324190894130554;0.289544235924933;0.316205533596838;0.306666666666667;0.329749103942652;0.293838862559242;0.330700888450148;0.317248459958932;0.360277136258661;0.32258064516129;0.2310…	11;NA;10;5;2;1;4;8;7;12	11;NA;6;13;2;1;3;4;10;8;9;12;7;17	45
GAGA-0334.Scaffold49.217637-266923	GAGA-0334	Rossomyrmex quandratinodus	Formicinae	PacBio	ankyrin_repeat_protein	Wolbachia	Rickettsiales	Alphaproteobacteria	Scaffold49	217637	266923	Scaffold49:237637-238091;Scaffold49:239557-246923	237637;239557	238091;246923	CP001391.1;740610;741057;1.790E-72;282;456;73.900;Wolbachia sp. wRi;CP001391.1;741778;742720;1.088E-302;1046;943;84.700;Wolbachia sp. wRi	58;1024	0.314977973568282;0.306679337496606	NA;25	NA;27	2
GAGA-0335.Scaffold65.0-53277	GAGA-0335	Meranoplus bicolor	Myrmicinae	PacBio	NA	NA	NA	NA	Scaffold65	0	53277	Scaffold65:10960-13891;Scaffold65:14707-18043;Scaffold65:18554-19911;Scaffold65:20083-23287;Scaffold65:23893-24675;Scaffold65:24839-25778;Scaffold65:25901-28522;Scaffold65:28756-28957;Scaffold65:33175-33277;Scaffold65:4190-4435;Scaffold65:7209-8076;Scaffold65:8210-8706;Scaffold65:9726-9791	10960;14707;18554;20083;23893;24839;25901;28756;33175;4190;7209;8210;9726	13891;18043;19911;23287;24675;25778;28522;28957;33277;4435;8076;8706;9791	AM999887.1;342410;343920;0.000E+00;1152;1523;77.600;Wolbachia endosymbiont of Culex quinquefasciatus Pel;AM999887.1;1406149;1406688;2.975E-110;407;540;76.500;Wolbachia endosymbiont of Culex quinquefasciatus Pel;AM999887.1;1409615;1409976;3.857E-44;188;362;71.900;Wolbachia endosymbiont of Culex quinquefasciatus Pel;AM999887.1;1411048;1412440;1.417E-243;850;1415;73.000;Wolbachia endosymbiont of Cul…	9886;7094;3215;6257;2990;814;17392;807;210;435;1852;1240;177	0.357898328215626;0.3621103117506;0.391304347826087;0.348002496878901;0.374680306905371;0.355697550585729;0.339946585272797;0.368159203980099;0.323529411764706;0.322448979591837;0.377162629757785;0.405241935483871;0.276923076923077	31;22;NA;74;21	24;22;NA;84;21	13
GAGA-0335.Scaffold10.5578799-5624755	GAGA-0335	Meranoplus bicolor	Myrmicinae	PacBio	NA	Wolbachia	Rickettsiales	Alphaproteobacteria	Scaffold10	5578799	5624755	Scaffold10:5598799-5599157;Scaffold10:5599349-5599854;Scaffold10:5604018-5604755	5598799;5599349;5604018	5599157;5599854;5604755	AM999887.1;1370502;1370658;1.924E-24;122;157;77.700;Wolbachia endosymbiont of Culex quinquefasciatus Pel;CP001391.1;721530;721854;2.671E-97;364;325;84.900;Wolbachia sp. wRi;AM999887.1;494803;495289;2.396E-84;321;487;74.300;Wolbachia endosymbiont of Culex quinquefasciatus Pel	341;524;1620	0.240223463687151;0.316831683168317;0.320217096336499	NA;99	NA;115	3
GAGA-0335.Scaffold115.40411-81523	GAGA-0335	Meranoplus bicolor	Myrmicinae	PacBio	NA	NA	NA	NA	Scaffold115	40411	81523	Scaffold115:60411-60884;Scaffold115:61270-61523	60411;61270	60884;61523	CP001391.1;320871;321343;5.168E-56;227;473;70.800;Wolbachia sp. wRi;CP003884.1;316020;316261;3.582E-24;122;255;70.600;Wolbachia endosymbiont of Drosophila simulans wHa	457;63	0.315010570824524;0.268774703557312	NA	NA	2
GAGA-0337.Scaffold110.0-34117	GAGA-0337	Tapinoma melanocephalum	Dolichoderinae	PacBio	NA	NA	NA	NA	Scaffold110	0	34117	Scaffold110:13432-14117	13432	14117	CP008941.1;2105371;2105901;3.855E-27;131;537;66.000;Candidatus Paracaedibacter acanthamoebae	338	0.454014599	NA	NA	1
GAGA-0337.Scaffold123.46450-84840	GAGA-0337	Tapinoma melanocephalum	Dolichoderinae	PacBio	NA	NA	NA	NA	Scaffold123	46450	84840	Scaffold123:66450-68051;Scaffold123:68488-68966;Scaffold123:69463-69854;Scaffold123:70070-70777;Scaffold123:71193-72960;Scaffold123:73215-74176;Scaffold123:74474-77652;Scaffold123:78283-81861;Scaffold123:82200-84840	66450;68488;69463;70070;71193;73215;74474;78283;82200	68051;68966;69854;70777;72960;74176;77652;81861;84840	CP001738.1;5074442;5075796;0.000E+00;1525;1362;85.300;Thermomonospora curvata DSM 43183;FO082843.1;466990;467466;1.723E-96;362;480;77.300;Nocardia cyriacigeorgica GUH-2;CP001814.1;10292558;10292947;1.288E-33;153;390;69.000;Streptosporangium roseum DSM 43021;AP006618.1;431650;432313;1.230E-142;515;664;77.500;Nocardia farcinica IFM 10152;CP006850.1;487303;488601;0.000E+00;1410;1307;84.200;Nocardia …	249784;1635;484;2332;99190;13483;89546;84949;183550	0.669581511555278;0.684100418410042;0.636828644501279;0.650636492220651;0.640067911714771;0.690946930280957;0.674638137193203;0.686137506987144;0.676893939393939	NA	NA	9
GAGA-0338.Scaffold469.0-30361	GAGA-0338	Lepisiota rothneyi	Formicinae	PacBio	NA	NA	NA	NA	Scaffold469	0	30361	Scaffold469:18407-23164;Scaffold469:23271-30361	18407;23271	23164;30361	CP001391.1;236889;236983;1.546E-32;149;95;94.700;Wolbachia sp. wRi;CP001391.1;1246258;1246330;2.068E-10;76;82;81.700;Wolbachia sp. wRi	53962;54903	0.360731553500105;0.358392101551481	NA	NA	2
GAGA-0338.Scaffold12.2556293-2596721	GAGA-0338	Lepisiota rothneyi	Formicinae	PacBio	NA	NA	NA	NA	Scaffold12	2556293	2596721	Scaffold12:2576293-2576721	2576293	2576721	CP003883.1;103083;103512;1.926E-58;235;430;72.600;Wolbachia endosymbiont of Drosophila simulans wNo	543	0.341121495	5	5	1
GAGA-0338.Scaffold191.6117-51473	GAGA-0338	Lepisiota rothneyi	Formicinae	PacBio	NA	NA	NA	NA	Scaffold191	6117	51473	Scaffold191:26117-27675;Scaffold191:29938-30171;Scaffold191:31019-31473	26117;29938;31019	27675;30171;31473	CP009048.1;4062589;4063134;9.976E-66;259;546;75.000;Pseudomonas alkylphenolica;HG322949.1;241245;241473;1.196E-13;87;235;71.300;Janthinobacterium agaricidamnosum NBRC 102515 = DSM 9628;AP013068.1;5182555;5182923;4.627E-26;128;409;71.500;Pseudomonas resinovorans NBRC 106553	9736;327;277	0.674582798459564;0.643776824034335;0.651982378854626	NA;0	NA;0	3
GAGA-0341.Scaffold124.0-233921	GAGA-0341	Nylanderia fulva	Formicinae	PacBio	NA	NA	NA	NA	Scaffold124	0	233921	Scaffold124:100563-100762;Scaffold124:104271-105467;Scaffold124:105986-107137;Scaffold124:10639-11599;Scaffold124:107304-108310;Scaffold124:110448-110770;Scaffold124:110982-112203;Scaffold124:114201-115147;Scaffold124:115413-115917;Scaffold124:117157-118572;Scaffold124:118768-119485;Scaffold124:119959-120129;Scaffold124:120856-121015;Scaffold124:121297-121544;Scaffold124:122094-122915;Scaffold124…	100563;104271;105986;10639;107304;110448;110982;114201;115413;117157;118768;119959;120856;121297;122094;1222;123609;124532;125517;126273;127818;128558;128847;130133;13123;131537;132283;133543;134060;134526;138465;13907;139862;141280;143237;145391;147628;148277;15099;153422;154538;154892;155124;155356;156559;158582;1588;161392;161795;164101;165416;167465;168247;168594;16911;170319;172199;173291;17…	100762;105467;107137;11599;108310;110770;112203;115147;115917;118572;119485;120129;121015;121544;122915;1322;124410;125385;125580;127592;128397;128714;129162;131220;13548;131962;133436;133786;134367;136252;138785;14397;140857;142987;144489;147227;148034;152659;15407;154393;154677;154985;155212;155744;158097;160363;2070;161501;163202;165050;166122;167858;168356;169017;18673;171371;172845;173490;17…	CP011479.1;1708344;1708544;8.601E-09;70;201;67.600;Hoeflea sp. IMCC20628;AE007869.2;1813248;1813568;1.287E-16;96;321;68.500;Agrobacterium fabrum str. C58;CP010401.1;1053576;1054588;1.659E-103;385;1016;68.600;Bartonella ancashensis;CP000524.1;119241;119596;3.855E-27;131;356;69.500;Bartonella bacilliformis KC583;CP010401.1;1054891;1055860;5.750E-103;383;971;69.100;Bartonella ancashensis;CP010401.1;…	142;23272;11062;1892;6220;3558;30204;4243;27427;20652;2067;328;71;1462;2409;82;1064;4173;74;18256;1143;657;737;42824;8559;268;6165;760;101;59085;1082;225;4033;15641;44545;12104;644;48615;5194;6845;6817;9645;1166;183;25732;4512;6731;80;26914;5050;711;19620;129;36772;8035;1461;89;175;4709;1545;35048;23706;32959;156;1490;464;11423;40094;1147;93;234;647;1026;76;850;193;395;16127;1656;92;22658;605;79;…	0.452261306532663;0.484113712374582;0.476107732406603;0.466666666666667;0.476143141153081;0.450310559006211;0.45045045045045;0.474630021141649;0.444444444444444;0.436749116607774;0.492329149232915;0.529411764705882;0.509433962264151;0.48582995951417;0.438489646772229;0.36;0.49063670411985;0.468933177022274;0.412698412698413;0.494313874147081;0.469775474956822;0.480769230769231;0.498412698412698;0…	NA;7;6;5;4;3;9;2;1;8	NA;5;7;6;3;4;2;1	121
GAGA-0341.Scaffold300.0-127750	GAGA-0341	Nylanderia fulva	Formicinae	PacBio	NA	NA	NA	NA	Scaffold300	0	127750	Scaffold300:13638-15518;Scaffold300:15680-15752;Scaffold300:16191-16409;Scaffold300:18836-19606;Scaffold300:1977-3270;Scaffold300:21166-22211;Scaffold300:22462-22529;Scaffold300:23752-24390;Scaffold300:24928-25339;Scaffold300:25837-26689;Scaffold300:29301-30425;Scaffold300:31011-32378;Scaffold300:33290-33863;Scaffold300:35063-35478;Scaffold300:3667-4660;Scaffold300:38678-39768;Scaffold300:40711-4…	13638;15680;16191;18836;1977;21166;22462;23752;24928;25837;29301;31011;33290;35063;3667;38678;40711;41464;43598;46776;4874;49018;50636;51502;53243;54900;55839;56483;57334;59340;61526;68315;70682;7124;72892;73709;74043;74821;75614;80679;81561;83301;8343;85159;86706;91381;935;9684	15518;15752;16409;19606;3270;22211;22529;24390;25339;26689;30425;32378;33863;35478;4660;39768;41337;42926;46241;48886;6417;49953;51096;51605;54326;55589;56299;57130;58690;59971;67997;68662;71891;8088;73588;73805;74653;75473;77212;81447;82758;85007;9548;85894;87664;91487;1054;13218	CP000524.1;1023087;1024929;4.046E-305;1054;1844;72.900;Bartonella bacilliformis KC583;CP012669.1;774621;774694;4.621E-09;71;74;81.000;Altererythrobacter epoxidivorans;CP003123.1;1110606;1110825;3.855E-27;131;220;73.100;Bartonella australis Aust/NH1;AE008918.1;1101965;1102729;4.627E-26;128;765;63.900;Brucella melitensis bv. 1 str. 16M;BA000012.4;5278216;5278888;1.547E-49;206;673;67.000;Mesorhizobi…	127612;72;685;504;12096;5326;2124;78;1913;2242;29132;493;790;21847;12174;3529;12354;37608;19511;12316;17628;266;74;7064;4903;580;1809;12998;1623;262668;624;9898;14973;1343;4608;295;757;11091;2445;806;8947;27237;58347;6432;13439;10218;181603	0.484574468085106;0.555555555555556;0.467889908256881;0.479220779220779;0.473317865429234;0.492822966507177;0.537313432835821;0.460815047021944;0.457420924574209;0.488262910798122;0.480427046263345;0.485003657644477;0.427574171029668;0.479518072289157;0.516616314199396;0.474311926605505;0.485623003194888;0.467168262653899;0.477487703367386;0.479620853080569;0.458846403110823;0.488770053475936;0.4…	NA;4;6;5;8;12;7;11	NA;4;7;6;10;8;13	48
GAGA-0341.Scaffold46.1418454-1480181	GAGA-0341	Nylanderia fulva	Formicinae	PacBio	NA	NA	NA	NA	Scaffold46	1418454	1480181	Scaffold46:1438454-1439147;Scaffold46:1459488-1460181	1438454;1459488	1439147;1460181	HG917868.1;1468886;1469265;1.601E-08;70;380;64.300;Clostridium bornimense;FP565809.1;2116605;2117097;7.720E-30;140;493;67.000;Acetoanaerobium sticklandii	5825;6058	0.3997113997114;0.401154401154401	NA	NA	2
GAGA-0341.Scaffold398.0-75955	GAGA-0341	Nylanderia fulva	Formicinae	PacBio	NA	NA	NA	NA	Scaffold398	0	75955	Scaffold398:14998-15508;Scaffold398:15723-17569;Scaffold398:18164-18526;Scaffold398:19452-22161;Scaffold398:24531-26086;Scaffold398:29408-30743;Scaffold398:31680-31812;Scaffold398:32633-33537;Scaffold398:33673-34386;Scaffold398:3622-3744;Scaffold398:36427-37020;Scaffold398:37169-37572;Scaffold398:38247-39511;Scaffold398:40631-41366;Scaffold398:4156-6914;Scaffold398:43117-44119;Scaffold398:45367-4…	14998;15723;18164;19452;24531;29408;31680;32633;33673;3622;36427;37169;38247;40631;4156;43117;45367;46472;47838;49276;9269	15508;17569;18526;22161;26086;30743;31812;33537;34386;3744;37020;37572;39511;41366;6914;44119;45436;47257;48921;49564;10124	CP012622.1;293732;294231;6.204E-55;224;500;70.500;Spiroplasma cantharicola;CP003021.1;440113;441238;2.041E-163;584;1151;71.800;Mycoplasma putrefaciens KS1;AE017263.1;643082;643442;3.582E-24;122;364;69.400;Mesoplasma florum L1;CP005078.1;1105662;1106213;3.996E-20;108;552;65.100;Spiroplasma syrphidicola EA-1;CP000123.1;462899;464223;1.101E-146;528;1329;69.500;Mycoplasma capricolum subsp. capricolum…	4617;6114;123;75435;11286;6648;673;36822;6384;161;8009;3140;5106;4260;16558;9235;223;12130;36857;377;15171	0.356862745098039;0.297399783315276;0.273480662983425;0.325581395348837;0.309967845659164;0.313857677902622;0.28030303030303;0.34070796460177;0.321178120617111;0.311475409836066;0.315345699831366;0.334987593052109;0.283227848101266;0.295238095238095;0.313270485859318;0.354291417165669;0.217391304347826;0.27515923566879;0.303785780240074;0.309027777777778;0.314619883040936	NA;4;3;11;9;5;2	NA;3;5;11;7;4;2	21
GAGA-0341.Scaffold23.1737381-1778180	GAGA-0341	Nylanderia fulva	Formicinae	PacBio	NA	Wolbachia	Rickettsiales	Alphaproteobacteria	Scaffold23	1737381	1778180	Scaffold23:1757381-1758180	1757381	1758180	AE017321.1;1015487;1016293;1.148E-122;449;807;72.800;Wolbachia endosymbiont strain TRS of Brugia malayi	269	0.310387985	34	25	1
GAGA-0341.Scaffold46.1251582-1292458	GAGA-0341	Nylanderia fulva	Formicinae	PacBio	Ribonucleoside-diphosphate_reductase_subunit_beta	Zobellia_galactanivo			Scaffold46	1251582	1292458	Scaffold46:1271582-1272458	1271582	1272458	FP476056.1;2226515;2227366;3.857E-61;244;855;67.400;Zobellia galactanivorans	161	0.383561644	NA	NA	1
GAGA-0341.Scaffold300.0-21627	GAGA-0341	Nylanderia fulva	Formicinae	PacBio	NA	NA	NA	NA	Scaffold300	0	21627	Scaffold300:1483-1627	1483	1627	CP000489.1;1965197;1965285;4.625E-26;128;90;92.200;Paracoccus denitrificans PD1222	8241	0.458333333	NA	NA	1
GAGA-0341.Scaffold379.9714-70444	GAGA-0341	Nylanderia fulva	Formicinae	PacBio	NA	NA	NA	NA	Scaffold379	9714	70444	Scaffold379:29714-29785;Scaffold379:35898-36020;Scaffold379:36200-36290;Scaffold379:36896-36950;Scaffold379:40968-41192;Scaffold379:44232-44452;Scaffold379:50166-50444	29714;35898;36200;36896;40968;44232;50166	29785;36020;36290;36950;41192;44452;50444	AE017263.1;275203;275274;1.723E-11;79;73;84.900;Mesoplasma florum L1;CP009056.1;2091456;2091563;5.351E-15;91;108;79.800;Frischella perrara;AM422018.1;678334;678408;2.671E-12;82;75;84.000;Candidatus Phytoplasma australiense;AE017263.1;533748;533803;8.601E-09;70;56;87.500;Mesoplasma florum L1;CP005076.1;299155;299380;3.455E-31;145;226;74.500;Spiroplasma diminutum CUAS-1;CP001321.1;1918594;1918810;4…	80;6377;1732;71;514;82;463	0.28169014084507;0.459016393442623;0.444444444444444;0.314814814814815;0.299107142857143;0.25;0.237410071942446	NA;15	NA;14	7
GAGA-0341.Scaffold77.340116-420304	GAGA-0341	Nylanderia fulva	Formicinae	PacBio	NA	NA	NA	NA	Scaffold77	340116	420304	Scaffold77:360116-360286;Scaffold77:360977-361340;Scaffold77:373519-373754;Scaffold77:400237-400304	360116;360977;373519;400237	360286;361340;373754;400304	AM412317.1;170528;170679;3.996E-20;108;152;75.600;Clostridium botulinum A str. ATCC 3502;CP001185.1;1019449;1019813;1.335E-26;130;365;69.600;Thermosipho africanus TCF52B;FO203503.1;427985;428232;2.068E-10;76;248;67.700;Desulfobacula toluolica Tol2;CP003859.1;569684;569752;4.621E-09;71;69;82.600;Streptococcus constellatus subsp. pharyngis C1050	1780;185;382;143	0.4;0.349862258953168;0.302127659574468;0.358208955223881	NA	NA	4
GAGA-0346.Scaffold203.47538-87739	GAGA-0346	Megalomyrmex milenae	Myrmicinae	Chromosome level	NA	NA	NA	NA	Scaffold203	47538	87739	Scaffold203:67538-67739	67538	67739	CP003884.1;653482;653683;9.972E-32;147;202;76.900;Wolbachia endosymbiont of Drosophila simulans wHa	296	0.288557214	28	20	1
GAGA-0346.Scaffold1.5165728-5206197	GAGA-0346	Megalomyrmex milenae	Myrmicinae	Chromosome level	Granaticin_polyketide_putative_beta-ketoacyl_synthase_1	Azospirillium_brasilense	Rhodospirillales	Alphaproteobacteria	Scaffold1	5165728	5206197	Scaffold1:5185728-5186197	5185728	5186197	CP012914.1;1613365;1613835;8.938E-36;160;471;68.600;Azospirillum brasilense	301	0.66098081	NA	NA	1
GAGA-0346.Scaffold39.718936-759164	GAGA-0346	Megalomyrmex milenae	Myrmicinae	Chromosome level	NA	NA	NA	NA	Scaffold39	718936	759164	Scaffold39:738936-739164	738936	739164	CP003884.1;542503;542725;1.437E-29;139;230;74.600;Wolbachia endosymbiont of Drosophila simulans wHa	332	0.23245614	NA	NA	1
GAGA-0346.Scaffold1.7387586-7446840	GAGA-0346	Megalomyrmex milenae	Myrmicinae	Chromosome level	NA	NA	NA	NA	Scaffold1	7387586	7446840	Scaffold1:7407586-7407953;Scaffold1:7409752-7409935;Scaffold1:7426503-7426840	7407586;7409752;7426503	7407953;7409935;7426840	CP006644.1;4822477;4822621;1.854E-14;89;145;74.100;Sphingomonas sanxanigenens DSM 19645 = NX02;CP002156.1;895206;895390;1.334E-09;73;185;68.600;Parvularcula bermudensis HTCC2503;CP003984.1;1510713;1511053;3.211E-28;135;341;69.200;Planktomarina temperata RCA23	3151;246;3845	0.55858310626703;0.573770491803279;0.56973293768546	NA	NA	3
GAGA-0350.Scaffold434.0-64795	GAGA-0350	Formica fusca	Formicinae	PacBio	NA	NA	NA	NA	Scaffold434	0	64795	Scaffold434:1-1240;Scaffold434:11373-12028;Scaffold434:1535-2124;Scaffold434:15857-16047;Scaffold434:16834-16962;Scaffold434:18018-18282;Scaffold434:18387-18730;Scaffold434:18989-20360;Scaffold434:21053-21588;Scaffold434:2459-2544;Scaffold434:3502-5835;Scaffold434:6789-8740;Scaffold434:9672-10047	1;11373;1535;15857;16834;18018;18387;18989;21053;2459;3502;6789;9672	1240;12028;2124;16047;16962;18282;18730;20360;21588;2544;5835;8740;10047	CP012357.1;443901;444667;1.154E-71;279;770;68.400;Spiroplasma litorale;CP005076.1;433085;433741;3.333E-55;225;657;68.600;Spiroplasma diminutum CUAS-1;AE017263.1;378372;378827;3.716E-34;155;465;68.400;Mesoplasma florum L1;CP007520.1;407995;408188;2.875E-15;92;194;72.700;Mycoplasma yeatsii GM274B;CP005076.1;624486;624615;4.458E-16;95;130;77.000;Spiroplasma diminutum CUAS-1;CP004357.1;435043;435294;…	3469;2592;804;93;192;376;83;4972;3368;87;76083;77909;141	0.292978208232446;0.314503816793893;0.288624787775891;0.278947368421053;0.296875;0.261363636363636;0.291545189504373;0.279358132749818;0.302803738317757;0.211764705882353;0.289755679382769;0.317273193234239;0.28	NA;5;4;0;7	NA;5;12;0;6	13
GAGA-0350.Scaffold21.1054942-1095284	GAGA-0350	Formica fusca	Formicinae	PacBio	NA	Wolbachia	Rickettsiales	Alphaproteobacteria	Scaffold21	1054942	1095284	Scaffold21:1074942-1075284	1074942	1075284	CP003884.1;280431;280681;6.202E-72;280;253;84.700;Wolbachia endosymbiont of Drosophila simulans wHa	780	0.33625731	49	51	1
GAGA-0350.Scaffold105.234062-275279	GAGA-0350	Formica fusca	Formicinae	PacBio	NA	NA	NA	NA	Scaffold105	234062	275279	Scaffold105:254062-255279	254062	255279	CP006569.1;2342418;2343630;1.997E-275;956;1213;77.800;Sodalis praecaptivus	49872	0.493015612	NA	NA	1
GAGA-0350.Scaffold14.2283732-2323983	GAGA-0350	Formica fusca	Formicinae	PacBio	Ribosomal_RNA_small_subunit_methyltransferase_A	Spiroplasma_kunkelii	Entoplasmatales	Mollicutes	Scaffold14	2283732	2323983	Scaffold14:2303732-2303983	2303732	2303983	CP010899.1;61831;62080;3.455E-31;145;250;73.400;Spiroplasma kunkelii CR2-3x	321	0.227091633	NA	NA	1
GAGA-0350.Scaffold295.66215-107652	GAGA-0350	Formica fusca	Formicinae	PacBio	NA	NA	NA	NA	Scaffold295	66215	107652	Scaffold295:86215-87652	86215	87652	CP000826.1;2393465;2394688;3.753E-197;696;1224;73.100;Serratia proteamaculans 568	63527	0.496868476	NA	NA	1
GAGA-0350.Scaffold410.32515-72870	GAGA-0350	Formica fusca	Formicinae	PacBio	NA	NA	NA	NA	Scaffold410	32515	72870	Scaffold410:52515-53734	52515	53734	CP006569.1;2342418;2342909;3.573E-109;404;492;78.600;Sodalis praecaptivus	65322	0.49630845	NA	NA	1
GAGA-0350.Scaffold9.223113-282484	GAGA-0350	Formica fusca	Formicinae	PacBio	NA	Spiroplasma_kunkelii	Entoplasmatales	Mollicutes	Scaffold9	223113	282484	Scaffold9:243113-243382	243113	243382	CP010899.1;449003;449274;5.981E-45;191;272;75.700;Spiroplasma kunkelii CR2-3x	1508	0.230483271	NA	NA	1
GAGA-0350.Scaffold3.271594-315959	GAGA-0350	Formica fusca	Formicinae	PacBio	NA	NA	NA	NA	Scaffold3	271594	315959	Scaffold3:291594-292520;Scaffold3:293727-295959	291594;293727	292520;295959	CP009458.1;3110449;3111282;1.437E-80;309;881;66.700;Cedecea neteri;AE005674.2;492500;492683;7.165E-10;74;184;70.200;Shigella flexneri 2a str. 301	24673;83085	0.491360691144708;0.462365591397849	NA	NA	2
GAGA-0351.Scaffold19.0-77259	GAGA-0351	Diacamma rugosum	Ponerinae	PacBio	NA	NA	NA	NA	Scaffold19	0	77259	Scaffold19:1-5000;Scaffold19:5129-57259	1;5129	5000;57259	CP003884.1;309613;309743;2.673E-29;139;148;79.000;Wolbachia endosymbiont of Drosophila simulans wHa;CP003884.1;662883;664255;0.000E+00;2452;1373;99.800;Wolbachia endosymbiont of Drosophila simulans wHa	12920;536779	0.331866373274655;0.347726836754268	NA	NA	2
GAGA-0353.Scaffold587.0-76061	GAGA-0353	Odontomachus cf. monticola	Ponerinae	PacBio	NA	NA	NA	NA	Scaffold587	0	76061	Scaffold587:1613-2057;Scaffold587:16759-17210;Scaffold587:54545-55533;Scaffold587:55791-56061;Scaffold587:8837-9777	1613;16759;54545;55791;8837	2057;17210;55533;56061;9777	AP013028.1;1068091;1068482;1.996E-34;156;392;73.200;Wolbachia endosymbiont of Cimex lectularius;CP003884.1;326110;326377;5.559E-42;181;268;79.500;Wolbachia endosymbiont of Drosophila simulans wHa;CP001391.1;1073624;1074173;8.915E-104;386;550;78.700;Wolbachia sp. wRi;CP003884.1;327382;327660;1.112E-27;133;279;73.800;Wolbachia endosymbiont of Drosophila simulans wHa;CP003884.1;325967;326651;2.137E-…	876;1258;271;254;2001	0.301801801801802;0.297117516629712;0.299595141700405;0.348148148148148;0.296808510638298	NA;0	NA;0	5
GAGA-0353.Scaffold133.163897-228799	GAGA-0353	Odontomachus cf. monticola	Ponerinae	PacBio	NA	Wolbachia	Rickettsiales	Alphaproteobacteria	Scaffold133	163897	228799	Scaffold133:183897-184048;Scaffold133:189330-189938;Scaffold133:190150-190383;Scaffold133:207168-208222;Scaffold133:208471-208799	183897;189330;190150;207168;208471	184048;189938;190383;208222;208799	CP003884.1;279848;280000;2.676E-46;195;153;88.200;Wolbachia endosymbiont of Drosophila simulans wHa;CP003884.1;656450;657022;4.244E-159;569;573;82.900;Wolbachia endosymbiont of Drosophila simulans wHa;AM999887.1;487084;487316;8.011E-40;174;235;76.500;Wolbachia endosymbiont of Culex quinquefasciatus Pel;CP003884.1;656450;657529;0.000E+00;1114;1080;83.100;Wolbachia endosymbiont of Drosophila simula…	196;224;175;2000;712	0.317880794701987;0.330592105263158;0.360515021459227;0.332068311195446;0.375	40;NA;38	41;NA;38	5
GAGA-0353.Scaffold133.171513-235992	GAGA-0353	Odontomachus cf. monticola	Ponerinae	PacBio	NA	Wolbachia	Rickettsiales	Alphaproteobacteria	Scaffold133	171513	235992	Scaffold133:191513-191764;Scaffold133:199761-200244;Scaffold133:215501-215992	191513;199761;215501	191764;200244;215992	CP003883.1;1198605;1198847;4.465E-50;208;252;78.000;Wolbachia endosymbiont of Drosophila simulans wNo;CP003883.1;1198842;1199226;6.887E-119;436;385;85.100;Wolbachia endosymbiont of Drosophila simulans wNo;AP013028.1;1068096;1068587;2.137E-122;448;492;80.500;Wolbachia endosymbiont of Cimex lectularius	335;2494;1981	0.342629482071713;0.316770186335404;0.309572301425662	NA	NA	3
GAGA-0353.Scaffold10.1467605-1507799	GAGA-0353	Odontomachus cf. monticola	Ponerinae	PacBio	NA	NA	NA	NA	Scaffold10	1467605	1507799	Scaffold10:1487605-1487799	1487605	1487799	CP011856.1;1078546;1078730;1.112E-27;133;185;77.000;Spiroplasma eriocheiris	930	0.25257732	NA	NA	1
GAGA-0353.Scaffold299.122587-162868	GAGA-0353	Odontomachus cf. monticola	Ponerinae	PacBio	NA	NA	NA	NA	Scaffold299	122587	162868	Scaffold299:142587-142868	142587	142868	CP003884.1;657291;657573;9.619E-56;226;283;77.700;Wolbachia endosymbiont of Drosophila simulans wHa	156	0.380782918	NA	NA	1
GAGA-0353.Scaffold33.2026976-2067194	GAGA-0353	Odontomachus cf. monticola	Ponerinae	PacBio	NA	Spiroplasma_eriochei	Entoplasmatales	Mollicutes	Scaffold33	2026976	2067194	Scaffold33:2046976-2047194	2046976	2047194	CP012424.1;7992;8210;9.972E-32;147;219;75.100;Spiroplasma kunkelii CR2-3x	292	0.321100917	26	26	1
GAGA-0353.Scaffold5.4526747-4566986	GAGA-0353	Odontomachus cf. monticola	Ponerinae	PacBio	NA	Spiroplasma_cf.	Entoplasmatales	Mollicutes	Scaffold5	4526747	4566986	Scaffold5:4546747-4546986	4546747	4546986	CP011856.1;226240;226479;4.000E-37;165;241;75.600;Spiroplasma eriocheiris	275	0.263598326	43	43	1
GAGA-0353.Scaffold133.233686-303600	GAGA-0353	Odontomachus cf. monticola	Ponerinae	PacBio	NA	Wolbachia	Rickettsiales	Alphaproteobacteria	Scaffold133	233686	303600	Scaffold133:253686-254735;Scaffold133:254984-255518;Scaffold133:280889-281439;Scaffold133:282477-283600	253686;254984;280889;282477	254735;255518;281439;283600	CP001391.1;1073887;1074202;1.285E-101;379;316;87.000;Wolbachia sp. wRi;AM999887.1;487084;487316;6.673E-41;177;233;76.800;Wolbachia endosymbiont of Culex quinquefasciatus Pel;AM999887.1;1419269;1419782;3.842E-112;414;523;77.600;Wolbachia endosymbiont of Culex quinquefasciatus Pel;CP003884.1;325965;326961;0.000E+00;1089;997;84.700;Wolbachia endosymbiont of Drosophila simulans wHa	836;662;1669;2626	0.322211630123928;0.350187265917603;0.365454545454545;0.329474621549421	NA;26	NA;24	4
GAGA-0353.Scaffold31.258634-302181	GAGA-0353	Odontomachus cf. monticola	Ponerinae	PacBio	NA	NA	NA	NA	Scaffold31	258634	302181	Scaffold31:278634-279145;Scaffold31:281754-282181	278634;281754	279145;282181	AM999887.1;1287075;1287501;1.471E-158;568;428;89.700;Wolbachia endosymbiont of Culex quinquefasciatus Pel;HE660029.1;606147;606570;8.270E-118;432;425;82.800;Wolbachia endosymbiont of Onchocerca ochengi	2607;3058	0.295499021526419;0.2903981264637	NA;222	NA;211	2
GAGA-0353.Scaffold84.383124-426670	GAGA-0353	Odontomachus cf. monticola	Ponerinae	PacBio	NA	NA	NA	NA	Scaffold84	383124	426670	Scaffold84:403124-403642;Scaffold84:406243-406670	403124;406243	403642;406670	AM999887.1;1287075;1287501;3.288E-157;563;428;89.400;Wolbachia endosymbiont of Culex quinquefasciatus Pel;HE660029.1;606147;606570;8.270E-118;432;425;82.800;Wolbachia endosymbiont of Onchocerca ochengi	2548;3152	0.297297297297297;0.2903981264637	NA;32	NA;27	2
GAGA-0353.Scaffold91.23595-67126	GAGA-0353	Odontomachus cf. monticola	Ponerinae	PacBio	NA	NA	NA	NA	Scaffold91	23595	67126	Scaffold91:43595-44023;Scaffold91:46699-47126	43595;46699	44023;47126	AM999887.1;1287075;1287479;3.550E-143;517;407;88.900;Wolbachia endosymbiont of Culex quinquefasciatus Pel;AE017321.1;878459;878898;1.539E-117;431;440;82.900;Wolbachia endosymbiont strain TRS of Brugia malayi	4533;4710	0.285046728971963;0.288056206088993	12;15	11;15	2
GAGA-0353.Scaffold497.32778-76330	GAGA-0353	Odontomachus cf. monticola	Ponerinae	PacBio	NA	NA	NA	NA	Scaffold497	32778	76330	Scaffold497:52778-53207;Scaffold497:55903-56330	52778;55903	53207;56330	AM999887.1;1287075;1287295;1.547E-66;262;224;87.000;Wolbachia endosymbiont of Culex quinquefasciatus Pel;HE660029.1;606147;606239;1.034E-24;123;93;89.200;Wolbachia endosymbiont of Onchocerca ochengi	3201;2651	0.286713286713287;0.292740046838407	8;19	9;22	2
GAGA-0354.Scaffold391.0-34866	GAGA-0354	Cataglyphis aenescens	Formicinae	PacBio	NA	NA	NA	NA	Scaffold391	0	34866	Scaffold391:16137-17753;Scaffold391:18949-19800;Scaffold391:19951-20371;Scaffold391:21257-22471;Scaffold391:22760-23123;Scaffold391:24313-25008;Scaffold391:25309-25506;Scaffold391:25689-25958;Scaffold391:26084-29038;Scaffold391:30344-31231	16137;18949;19951;21257;22760;24313;25309;25689;26084;30344	17753;19800;20371;22471;23123;25008;25506;25958;29038;31231	CP012622.1;70052;70770;3.582E-24;122;743;32.300;Spiroplasma cantharicola;CP005074.1;74678;75355;1.664E-35;159;696;66.200;Spiroplasma taiwanense CT-1;CP003021.1;117490;117899;3.211E-28;135;410;66.800;Mycoplasma putrefaciens KS1;CP007520.1;580041;580528;1.664E-35;159;491;67.600;Mycoplasma yeatsii GM274B;BX293980.2;1063506;1063731;7.720E-30;140;226;74.100;Mycoplasma mycoides subsp. mycoides SC str. …	14767;1081;766;2278;1631;223;455;708;11324;964	0.292282430213465;0.314923619271445;0.330952380952381;0.3500823723229;0.380165289256198;0.282014388489209;0.299492385786802;0.282527881040892;0.300947867298578;0.302142051860203	0;NA;4	13;NA;3	10
GAGA-0354.Scaffold525.0-20118	GAGA-0354	Cataglyphis aenescens	Formicinae	PacBio	NA	NA	NA	NA	Scaffold525	0	20118	Scaffold525:18074-18553	18074	18553	CP001184.1;485365;485758;4.627E-26;128;396;68.100;Ureaplasma urealyticum serovar 10 str. ATCC 33699	4241	0.30480167	NA	NA	1
GAGA-0354.Scaffold108.244230-284804	GAGA-0354	Cataglyphis aenescens	Formicinae	PacBio	Cell_shape-determining_protein_MreB	Spiroplasma_eriochei	Entoplasmatales	Mollicutes	Scaffold108	244230	284804	Scaffold108:264230-264358;Scaffold108:264483-264804	264230;264483	264358;264804	CP011856.1;1353206;1353342;1.435E-12;83;137;73.700;Spiroplasma eriocheiris;CP011856.1;1352786;1353110;5.166E-39;171;325;72.600;Spiroplasma eriocheiris	84;493	0.3046875;0.246105919003115	NA;62	NA;64	2
GAGA-0356.Scaffold15.1399548-1443314	GAGA-0356	Aphaenogaster exasperata	Myrmicinae	PacBio	ankyrin_repeat_protein	Wolbachia	Rickettsiales	Alphaproteobacteria	Scaffold15	1399548	1443314	Scaffold15:1419548-1420371;Scaffold15:1422245-1423314	1419548;1422245	1420371;1423314	CP001391.1;740624;741448;0.000E+00;1153;825;91.100;Wolbachia sp. wRi;CP001391.1;737584;738657;0.000E+00;1552;1074;92.200;Wolbachia sp. wRi	768;882	0.33778857837181;0.336763330215154	19;17	19;20	2
GAGA-0356.Scaffold34.2287559-2333994	GAGA-0356	Aphaenogaster exasperata	Myrmicinae	PacBio	ankyrin_repeat_protein	Wolbachia	Rickettsiales	Alphaproteobacteria	Scaffold34	2287559	2333994	Scaffold34:2307559-2307991;Scaffold34:2310166-2311464;Scaffold34:2312339-2312583;Scaffold34:2312685-2312856;Scaffold34:2313793-2313994	2307559;2310166;2312339;2312685;2313793	2307991;2311464;2312583;2312856;2313994	AM999887.1;302009;302445;1.547E-66;262;437;73.400;Wolbachia endosymbiont of Culex quinquefasciatus Pel;AM999887.1;496341;497616;3.855E-78;301;1300;63.600;Wolbachia endosymbiont of Culex quinquefasciatus Pel;AP013028.1;332393;332634;1.153E-20;110;246;70.900;Wolbachia endosymbiont of Cimex lectularius;CP003884.1;394368;394540;1.034E-24;123;173;75.700;Wolbachia endosymbiont of Drosophila simulans wH…	92;302;111;124;381	0.275462962962963;0.282742681047766;0.307377049180328;0.35672514619883;0.288557213930348	NA;49;47	NA;49;47	5
GAGA-0356.Scaffold93.511040-551232	GAGA-0356	Aphaenogaster exasperata	Myrmicinae	PacBio	NA	NA	NA	NA	Scaffold93	511040	551232	Scaffold93:531040-531232	531040	531232	CP001391.1;741255;741448;1.790E-72;282;194;92.200;Wolbachia sp. wRi	566	0.348958333	25	24	1
GAGA-0358.Scaffold601.0-18154	GAGA-0358	Pheidole nodus	Myrmicinae	PacBio	NA	NA	NA	NA	Scaffold601	0	18154	Scaffold601:10904-11180;Scaffold601:9948-10334	10904;9948	11180;10334	CP009217.2;1514732;1514955;3.329E-21;112;224;70.900;Rickettsiales bacterium Ac37b;CP002083.1;1551780;1552016;1.197E-30;143;237;73.900;Hyphomicrobium denitrificans ATCC 51888	5732;285	0.514492753623188;0.450777202072539	NA	NA	2
GAGA-0359.Scaffold294.0-68742	GAGA-0359	Formica japonica	Formicinae	PacBio	NA	NA	NA	NA	Scaffold294	0	68742	Scaffold294:10244-10568;Scaffold294:10742-11103;Scaffold294:11487-12048;Scaffold294:16371-16755;Scaffold294:1776-2209;Scaffold294:19987-21403;Scaffold294:2-343;Scaffold294:21526-21615;Scaffold294:26579-26950;Scaffold294:27231-27694;Scaffold294:30958-31074;Scaffold294:32042-32677;Scaffold294:35112-35820;Scaffold294:38570-39732;Scaffold294:45086-45456;Scaffold294:46914-47119;Scaffold294:48549-48742…	10244;10742;11487;16371;1776;19987;2;21526;26579;27231;30958;32042;35112;38570;45086;46914;48549;5408;6021;714;7362;8920	10568;11103;12048;16755;2209;21403;343;21615;26950;27694;31074;32677;35820;39732;45456;47119;48742;5548;6118;1499;8776;9243	AE008692.2;1086001;1086326;6.423E-14;88;326;67.100;Zymomonas mobilis subsp. mobilis ZM4 = ATCC 31821;AP014690.1;1076556;1076918;5.559E-42;181;363;71.400;Asaia bogorensis NBRC 16594;CP011451.1;598138;598231;8.601E-09;70;94;77.800;Nitrosomonas communis;AE016827.1;18318;18676;4.300E-23;118;359;68.500;[Mannheimia] succiniciproducens MBEL55E;CP009238.1;1317834;1318067;3.849E-10;75;234;67.600;Basilea p…	162;11843;755;479;1814;10657;404;161;100;144;9921;508;1679;8658;5468;2527;97;11652;154;4258;9185;1066	0.453703703703704;0.470914127423823;0.477718360071301;0.53125;0.441108545034642;0.483757062146893;0.460410557184751;0.528089887640449;0.493261455525606;0.520518358531317;0.439655172413793;0.48503937007874;0.504237288135593;0.463855421686747;0.527027027027027;0.526829268292683;0.518134715025907;0.528571428571429;0.515463917525773;0.489171974522293;0.485148514851485;0.455108359133127	NA;7;10;6;4;12	NA;7;11;5;3;10;13	22
GAGA-0359.Scaffold305.8120-188511	GAGA-0359	Formica japonica	Formicinae	PacBio	NA	NA	NA	NA	Scaffold305	8120	188511	Scaffold305:105049-105453;Scaffold305:105756-107575;Scaffold305:112502-113817;Scaffold305:114114-114307;Scaffold305:115287-117066;Scaffold305:119473-119596;Scaffold305:120460-121233;Scaffold305:122663-122826;Scaffold305:124972-125051;Scaffold305:133249-133545;Scaffold305:133716-134144;Scaffold305:135027-135178;Scaffold305:135783-136383;Scaffold305:139646-140931;Scaffold305:141119-141292;Scaffold3…	105049;105756;112502;114114;115287;119473;120460;122663;124972;133249;133716;135027;135783;139646;141119;143884;146835;150479;151913;152574;153915;155390;158197;164706;168257;173518;176063;178596;182727;184349;188331;28120;29309;29689;30962;32530;34795;44436;45150;57156;72157;96036;96571	105453;107575;113817;114307;117066;119596;121233;122826;125051;133545;134144;135178;136383;140931;141292;144942;147092;151489;152381;152817;154719;155644;158312;165132;168719;173776;176235;179342;182811;184907;188430;28343;29474;30031;31285;34647;35807;44617;45383;57341;73548;96112;96741	CP000628.1;2587692;2588037;2.986E-42;182;346;72.000;Agrobacterium radiobacter K84;CP000142.2;1418967;1419301;3.718E-34;155;335;70.900;Pelobacter carbinolicus DSM 2380;AP014690.1;2973606;2974457;2.309E-91;345;852;69.500;Asaia bogorensis NBRC 16594;CP002526.1;2520010;2520204;2.671E-12;82;195;69.200;Glaciecola sp. 4H-3-7+YE-5;CP003926.1;1341811;1342447;1.545E-83;319;637;71.100;Gluconobacter oxydans …	6746;68425;2088;166;3242;75;7910;345;85;6706;1786;17215;6298;792;14365;1192;2522;1260;328;3176;304;10772;3470;486;10989;218;15759;76;872;3811;195;87;161;1755;17440;5347;97;582;2011;5300;150;251	0.48019801980198;0.490929081913139;0.488212927756654;0.518134715025907;0.50646430578977;0.552845528455285;0.460543337645537;0.52760736196319;0.405063291139241;0.435810810810811;0.478971962616822;0.536423841059603;0.458333333333333;0.43579766536965;0.491329479768786;0.494328922495274;0.474708171206226;0.461386138613861;0.474358974358974;0.510288065843621;0.478855721393035;0.480314960629921;0.51304…	NA;3;9;8;7;5;10;17	NA;3;8;7;6;5;9;16	43
GAGA-0359.Scaffold603.0-65123	GAGA-0359	Formica japonica	Formicinae	PacBio	NA	NA	NA	NA	Scaffold603	0	65123	Scaffold603:11061-11219;Scaffold603:11565-12565;Scaffold603:18324-18630;Scaffold603:1894-2067;Scaffold603:20660-21550;Scaffold603:22842-23134;Scaffold603:2349-2466;Scaffold603:24163-24391;Scaffold603:35710-35914;Scaffold603:4237-4413;Scaffold603:44742-45123;Scaffold603:4516-4644;Scaffold603:956-1294	11061;11565;18324;1894;20660;22842;2349;24163;35710;4237;44742;4516;956	11219;12565;18630;2067;21550;23134;2466;24391;35914;4413;45123;4644;1294	CP001052.1;3788689;3788848;1.334E-09;73;160;70.000;Paraburkholderia phytofirmans PsJN;AE008692.2;372561;372783;2.875E-15;92;223;69.000;Zymomonas mobilis subsp. mobilis ZM4 = ATCC 31821;CP003926.1;1450079;1450386;2.577E-19;105;308;67.500;Gluconobacter oxydans H24;AP011121.1;2851628;2851777;1.854E-14;89;150;73.600;Acetobacter pasteurianus IFO 3283-01;AP011121.1;233242;233682;1.788E-21;113;441;66.20…	74;20896;182;244;8312;229;248;264;1183;102;1345;170;363	0.531645569620253;0.477;0.486928104575163;0.479768786127168;0.486516853932584;0.476027397260274;0.504273504273504;0.491228070175439;0.441176470588235;0.4375;0.464566929133858;0.4609375;0.452662721893491	NA;11;8;9	NA;11;8;9	13
GAGA-0359.Scaffold323.0-79322	GAGA-0359	Formica japonica	Formicinae	PacBio	NA	NA	NA	NA	Scaffold323	0	79322	Scaffold323:1219-2856;Scaffold323:21276-30639;Scaffold323:3-943;Scaffold323:3081-16615;Scaffold323:31011-32169;Scaffold323:33634-33716;Scaffold323:33834-33974;Scaffold323:34627-35098;Scaffold323:35361-35457;Scaffold323:37276-37549;Scaffold323:38384-38494;Scaffold323:38754-49404;Scaffold323:49535-51872;Scaffold323:52685-53985;Scaffold323:54114-55915;Scaffold323:56812-57205;Scaffold323:57814-59322	1219;21276;3;3081;31011;33634;33834;34627;35361;37276;38384;38754;49535;52685;54114;56812;57814	2856;30639;943;16615;32169;33716;33974;35098;35457;37549;38494;49404;51872;53985;55915;57205;59322	AP013028.1;914229;914357;2.067E-10;76;137;74.400;Wolbachia endosymbiont of Cimex lectularius;AM999887.1;58497;58901;5.750E-103;383;412;80.800;Wolbachia endosymbiont of Culex quinquefasciatus Pel;CP003884.1;1007261;1008204;0.000E+00;1515;944;96.000;Wolbachia endosymbiont of Drosophila simulans wHa;CP003883.1;661550;661617;4.621E-09;71;68;83.800;Wolbachia endosymbiont of Drosophila simulans wNo;CP0…	9332;87560;5772;123235;740;293;123;1081;93;1572;106;31499;6296;4108;2182;1448;8701	0.383017715332926;0.347110968706611;0.357446808510638;0.361829466528742;0.291018998272884;0.329268292682927;0.278571428571429;0.329087048832272;0.385416666666667;0.32967032967033;0.263636363636364;0.350892018779343;0.376551133932392;0.378461538461538;0.367018323153803;0.320610687022901;0.375331564986737	NA;17;8	NA;18;8;0	17
GAGA-0359.Scaffold176.152425-230642	GAGA-0359	Formica japonica	Formicinae	PacBio	NA	NA	NA	NA	Scaffold176	152425	230642	Scaffold176:172425-173380;Scaffold176:173627-173817;Scaffold176:174307-177140;Scaffold176:177414-179844;Scaffold176:179976-181222;Scaffold176:181479-181913;Scaffold176:182074-183409;Scaffold176:184321-185199;Scaffold176:185303-186787;Scaffold176:189027-190000;Scaffold176:195658-196012;Scaffold176:196335-196522;Scaffold176:198023-198227;Scaffold176:198533-198653;Scaffold176:200590-201072;Scaffold1…	172425;173627;174307;177414;179976;181479;182074;184321;185303;189027;195658;196335;198023;198533;200590;201211;201769;202074;203224;204680;206228;207023;208136;210228;210497	173380;173817;177140;179844;181222;181913;183409;185199;186787;190000;196012;196522;198227;198653;201072;201468;201878;202547;204385;206097;206457;207126;208410;210389;210642	CP012669.1;1496860;1497173;8.613E-26;127;314;69.700;Altererythrobacter epoxidivorans;LN609302.1;1340001;1340192;3.211E-28;135;192;75.500;Acetobacter ghanensis;CP000009.1;391725;392981;6.501E-194;685;1257;72.200;Gluconobacter oxydans 621H;AP012035.1;2408330;2408466;1.995E-17;99;137;75.900;Acidiphilium multivorum AIU301;CP004360.1;2381357;2381840;9.617E-39;170;484;68.900;Komagataeibacter xylinus E2…	35665;136;68829;44580;16291;4250;7728;19542;14427;14515;182;77;2130;150;9511;926;306;3279;26499;123215;73;158;462;872;1937	0.458638743455497;0.489473684210526;0.474761736674903;0.449382716049383;0.48314606741573;0.483870967741935;0.460674157303371;0.455580865603645;0.455525606469003;0.465570400822199;0.477401129943503;0.529411764705882;0.436274509803922;0.55;0.481327800829876;0.501945525291829;0.559633027522936;0.490486257928118;0.494401378122308;0.478475652787579;0.506550218340611;0.41747572815534;0.514598540145985;…	NA;11;12	NA;12;6	25
GAGA-0359.Scaffold14.4797696-4838038	GAGA-0359	Formica japonica	Formicinae	PacBio	NA	Wolbachia	Rickettsiales	Alphaproteobacteria	Scaffold14	4797696	4838038	Scaffold14:4817696-4818038	4817696	4818038	CP003884.1;656526;656867;2.866E-117;431;343;88.400;Wolbachia endosymbiont of Drosophila simulans wHa	1507	0.33625731	57	59	1
GAGA-0359.Scaffold11.5832663-5873883	GAGA-0359	Formica japonica	Formicinae	PacBio	Cyclopropane-fatty-acyl-phospholipid_synthase	Sodalis_praecaptivus	Enterobacterales	Gammaproteobacteria	Scaffold11	5832663	5873883	Scaffold11:5852663-5853883	5852663	5853883	CP006569.1;2342418;2343261;1.163E-200;707;844;78.900;Sodalis praecaptivus	70063	0.502459016	NA	NA	1
GAGA-0359.Scaffold114.25916-67135	GAGA-0359	Formica japonica	Formicinae	PacBio	Cyclopropane-fatty-acyl-phospholipid_synthase	Sodalis_praecaptivus	Enterobacterales	Gammaproteobacteria	Scaffold114	25916	67135	Scaffold114:45916-47135	45916	47135	CP006569.1;2342418;2343507;1.861E-272;946;1090;79.600;Sodalis praecaptivus	65692	0.500410172	NA	NA	1
GAGA-0359.Scaffold12.3341534-3381785	GAGA-0359	Formica japonica	Formicinae	PacBio	Ribosomal_RNA_small_subunit_methyltransferase_A	Spiroplasma_mirum_AT	Entoplasmatales	Mollicutes	Scaffold12	3341534	3381785	Scaffold12:3361534-3361785	3361534	3361785	CP002082.1;1110276;1110526;8.011E-40;174;251;75.700;Spiroplasma mirum ATCC 29335	642	0.227091633	NA	NA	1
GAGA-0359.Scaffold177.189553-231591	GAGA-0359	Formica japonica	Formicinae	PacBio	NA	NA	NA	NA	Scaffold177	189553	231591	Scaffold177:209553-211591	209553	211591	CP006569.1;2342418;2343372;3.357E-201;709;955;77.300;Sodalis praecaptivus	64343	0.463199215	NA	NA	1
GAGA-0359.Scaffold313.52749-93969	GAGA-0359	Formica japonica	Formicinae	PacBio	NA	NA	NA	NA	Scaffold313	52749	93969	Scaffold313:72749-73969	72749	73969	CP006569.1;2342418;2343630;1.014E-299;1036;1213;79.300;Sodalis praecaptivus	67450	0.499180328	NA	NA	1
GAGA-0359.Scaffold43.572158-613375	GAGA-0359	Formica japonica	Formicinae	PacBio	Cyclopropane-fatty-acyl-phospholipid_synthase	Erwinia_tasmaniensis	Enterobacterales	Gammaproteobacteria	Scaffold43	572158	613375	Scaffold43:592158-593375	592158	593375	CU468135.1;2053532;2054370;2.213E-132;481;842;73.100;Erwinia tasmaniensis Et1/99	62632	0.491372227	NA	NA	1
GAGA-0359.Scaffold145.420787-461161	GAGA-0359	Formica japonica	Formicinae	PacBio	NA	NA	NA	NA	Scaffold145	420787	461161	Scaffold145:450802-450952;Scaffold145:452144-453621;Scaffold145:454564-454777;Scaffold145:455345-456410;Scaffold145:456571-456750;Scaffold145:457690-458592;Scaffold145:460673-461157	450802;452144;454564;455345;456571;457690;460673	450952;453621;454777;456410;456750;458592;461157	CP002461.1;234852;235004;1.544E-15;93;153;73.800;Lactobacillus sanfranciscensis TMW 1.1304;AL935263.2;1511373;1512730;1.581E-161;578;1358;69.600;Lactobacillus plantarum WCFS1;CP000423.1;72857;73071;1.435E-12;83;215;69.800;Lactobacillus paracasei ATCC 334;CP002987.1;2410868;2411335;7.720E-30;140;468;67.500;Acetobacterium woodii DSM 1030;CP003043.1;2478997;2479174;3.207E-11;79;181;70.200;Lactobacil…	94;67704;169;1538;80;2501;543	0.286666666666667;0.391333784698714;0.347417840375587;0.39906103286385;0.441340782122905;0.360310421286031;0.363636363636364	NA;4;5;3	NA;5;4;3	7
GAGA-0359.Scaffold27.528903-571122	GAGA-0359	Formica japonica	Formicinae	PacBio	Ribosomal_RNA_small_subunit_methyltransferase_A;Probable_fatty_acid_methyltransferase_Rv3720	Pantoea_vagans;Yersinia_pestis	NA	NA	Scaffold27	528903	571122	Scaffold27:548903-549804;Scaffold27:550186-551122	548903;550186	549804;551122	CP014129.2;2031625;2032138;4.141E-98;367;519;76.100;Pantoea vagans;AE009952.1;2148267;2148566;4.465E-50;208;300;75.300;Yersinia pestis KIM10+	26574;28506	0.498335183129856;0.46474358974359	NA	NA	2
GAGA-0359.Scaffold2.8918296-8962661	GAGA-0359	Formica japonica	Formicinae	PacBio	Ribosomal_RNA_small_subunit_methyltransferase_A	Sodalis_praecaptivus;Rahnella_aquatilis_C	NA	NA	Scaffold2	8918296	8962661	Scaffold2:8938296-8940528;Scaffold2:8941735-8942661	8938296;8941735	8940528;8942661	CP006569.1;2342418;2343128;1.471E-158;568;711;77.900;Sodalis praecaptivus;CP003244.1;3034364;3034598;1.197E-30;143;235;73.600;Rahnella aquatilis CIP 78.65 = ATCC 33071	82008;27895	0.462365591397849;0.493520518358531	NA	NA	2
GAGA-0360.Scaffold57.0-73089	GAGA-0360	Colobopsis minus	Formicinae	PacBio	NA	NA	NA	NA	Scaffold57	0	73089	Scaffold57:1-337;Scaffold57:10109-10768;Scaffold57:11951-12731;Scaffold57:16018-16374;Scaffold57:18053-18966;Scaffold57:20685-20893;Scaffold57:21769-23773;Scaffold57:24085-26382;Scaffold57:26749-28246;Scaffold57:28481-29713;Scaffold57:30363-32769;Scaffold57:35255-36786;Scaffold57:37941-38479;Scaffold57:39103-42981;Scaffold57:44574-45112;Scaffold57:46267-47798;Scaffold57:4852-7251;Scaffold57:52551…	1;10109;11951;16018;18053;20685;21769;24085;26749;28481;30363;35255;37941;39103;44574;46267;4852;52551;7726;987	337;10768;12731;16374;18966;20893;23773;26382;28246;29713;32769;36786;38479;42981;45112;47798;7251;53089;9433;3388	CP000016.1;358221;358558;7.441E-37;164;338;70.700;Candidatus Blochmannia pennsylvanicus str. BPEN;CP003315.1;224341;224465;1.924E-24;122;125;81.600;Wigglesworthia glossinidia endosymbiont of Glossina morsitans morsitans (Yale colony);BX248583.1;327631;328149;8.619E-43;183;520;68.800;Candidatus Blochmannia floridanus;CP002189.2;330285;330651;6.423E-14;88;367;69.900;Candidatus Blochmannia vafer str…	1919;2197;1995;89;670;1610;82070;37521;26392;4572;116679;21692;336;15321;20449;142754;645;98125;143733	0.297619047619048;0.303490136570561;0.283333333333333;0.331460674157303;0.350492880613363;0.264423076923077;0.291417165668663;0.279059643012625;0.315297261189045;0.280844155844156;0.329177057356608;0.273024167210973;0.265799256505576;0.232078390923156;0.273677335075114;0.328053355564819;0.334715639810427;0.328196584756351	1;0;NA;1735;1498;1028;11;594;382	1;0;NA;1642;1221;11;565;579;66;4	20
GAGA-0360.Scaffold36.0-32883	GAGA-0360	Colobopsis minus	Formicinae	PacBio	NA	NA	NA	NA	Scaffold36	0	32883	Scaffold36:1-1410;Scaffold36:11723-11923;Scaffold36:12382-12883;Scaffold36:3973-6995;Scaffold36:7097-9574	1;11723;12382;3973;7097	1410;11923;12883;6995;9574	CP010048.1;180129;181131;4.408E-152;546;1003;72.600;Blochmannia endosymbiont of Polyrhachis (Hedomyrma) turneri;BA000021.3;307817;308018;1.435E-12;83;202;70.200;Wigglesworthia glossinidia endosymbiont of Glossina brevipalpis;CP000238.1;242824;242943;8.298E-16;94;120;77.800;Baumannia cicadellinicola str. Hc (Homalodisca coagulata);CP002645.1;223567;224572;2.927E-178;633;1006;74.400;Buchnera aphidi…	36538;166;6387;98163;32554	0.288147622427253;0.3;0.225548902195609;0.310390469887492;0.287848203471942	1;NA;9	38;NA;0	5
GAGA-0360.Scaffold40.484855-1009651	GAGA-0360	Colobopsis minus	Formicinae	PacBio	NA	NA	NA	NA	Scaffold40	484855	1009651	Scaffold40:1001068-1001511;Scaffold40:1001675-1002370;Scaffold40:1003177-1003675;Scaffold40:1004196-1005117;Scaffold40:1006948-1009597;Scaffold40:504855-506888;Scaffold40:510143-510478;Scaffold40:512284-512527;Scaffold40:513994-514549;Scaffold40:515474-517478;Scaffold40:519013-521102;Scaffold40:522432-522882;Scaffold40:526128-526471;Scaffold40:533681-534479;Scaffold40:534952-536240;Scaffold40:540…	1001068;1001675;1003177;1004196;1006948;504855;510143;512284;513994;515474;519013;522432;526128;533681;534952;540000;541608;542400;543812;544420;545714;546574;547841;550238;551898;554527;555797;557210;557642;557973;561334;564291;567327;569722;570679;575694;577303;578325;579441;580550;586081;587210;588378;589623;590918;593546;595966;597522;598751;600102;603053;605515;607060;609989;610401;611815;61…	1001511;1002370;1003675;1005117;1009597;506888;510478;512527;514549;517478;521102;522882;526471;534479;536240;540888;542156;543017;544308;544915;546410;547121;550099;551791;553292;555326;557086;557400;557811;558584;563568;566804;569377;569882;575000;576254;577842;579291;580047;581756;586175;587947;589318;590175;593358;594431;596828;597834;599507;600936;604256;606068;609068;610063;611594;612520;61…	BX248583.1;58266;58647;1.073E-51;213;382;73.700;Candidatus Blochmannia floridanus;CP002648.1;90821;91504;3.332E-38;168;684;66.000;Buchnera aphidicola str. Ua (Uroleucon ambrosiae);CP010049.1;62759;63258;3.457E-48;201;500;69.100;Blochmannia endosymbiont of Camponotus (Colobopsis) obliquus;AP012554.1;478722;479570;9.605E-90;339;864;69.000;Candidatus Pantoea carbekii;CP010049.1;57551;59079;0.000E+00…	4221;4667;202;7297;41290;19118;192;230;217;32170;44682;320;437;814;9045;68128;4969;2375;270;269;3796;4632;145395;2206;13239;755;5965;89;103;1926;56214;34077;52275;2284;184465;32413;7498;5398;4630;2973;98;1781;1756;549;23454;28389;1543;226;19989;2655;5753;352;185554;7826;3688;2964;4012;752;12542;283;1236;150005;8748;3145;82;9156;61136;7274;1288;1145;157;8182;25780;10624;24976;11441;7384;40782;599;…	0.358916478555305;0.286330935251799;0.261044176706827;0.301845819761129;0.31672329180823;0.361534677816035;0.265671641791045;0.267489711934156;0.27027027027027;0.360279441117764;0.382479655337482;0.271111111111111;0.285714285714286;0.261904761904762;0.246894409937888;0.306306306306306;0.302919708029197;0.291734197730956;0.262096774193548;0.260606060606061;0.28735632183908;0.303473491773309;0.2865…	NA;0;48;34;1151;1414;1939;2432;2891;2854;2799;2784;2708;2728;3079;3034;3203;3150;3137;3354;3470;3493;3404;3185;3214;3311;3433;3055;3044;2757;2544;1978;1105;775;1093;1884;1761;1026;744;94;33;7;14;3;2;6	NA;12;61;0;1298;1886;2017;2629;2834;2765;2780;2729;2702;2736;3062;3008;3136;3080;3220;3407;3538;3380;3188;3200;3178;3258;3321;3054;3151;2817;2070;1804;908;643;1339;1863;1697;833;352;74;23;10;1	235
GAGA-0360.Scaffold152.0-46790	GAGA-0360	Colobopsis minus	Formicinae	PacBio	NA	NA	NA	NA	Scaffold152	0	46790	Scaffold152:10027-10766;Scaffold152:1067-2036;Scaffold152:11187-12136;Scaffold152:12438-12999;Scaffold152:13741-16090;Scaffold152:16363-17248;Scaffold152:2202-2780;Scaffold152:3336-3899;Scaffold152:34040-34166;Scaffold152:45-583;Scaffold152:8898-8992	10027;1067;11187;12438;13741;16363;2202;3336;34040;45;8898	10766;2036;12136;12999;16090;17248;2780;3899;34166;583;8992	BX248583.1;93899;94609;1.726E-45;192;711;67.800;Candidatus Blochmannia floridanus;CP010049.1;110056;110987;2.556E-138;500;934;72.500;Blochmannia endosymbiont of Camponotus (Colobopsis) obliquus;AE016826.1;569199;569632;9.972E-32;147;434;67.900;Buchnera aphidicola str. Bp (Baizongia pistaciae);BX248583.1;91695;92135;6.668E-24;121;441;66.500;Candidatus Blochmannia floridanus;CP009056.1;295746;29636…	2382;7434;1849;914;18555;31141;2911;883;481;3964;98	0.261163734776725;0.265221878224974;0.239199157007376;0.333333333333333;0.303533418475947;0.324293785310734;0.254325259515571;0.284191829484902;0.285714285714286;0.262081784386617;0.265957446808511	NA	NA	11
GAGA-0360.Scaffold54.47044-121797	GAGA-0360	Colobopsis minus	Formicinae	PacBio	NA	NA	NA	NA	Scaffold54	47044	121797	Scaffold54:100835-101797;Scaffold54:67044-67611;Scaffold54:68034-72624;Scaffold54:73299-73593;Scaffold54:73917-75961;Scaffold54:76484-78954;Scaffold54:79084-79336;Scaffold54:79750-82289;Scaffold54:82503-83821;Scaffold54:85307-87839;Scaffold54:89633-90924;Scaffold54:91165-93704;Scaffold54:94138-96970;Scaffold54:97501-99537;Scaffold54:99878-100150	100835;67044;68034;73299;73917;76484;79084;79750;82503;85307;89633;91165;94138;97501;99878	101797;67611;72624;73593;75961;78954;79336;82289;83821;87839;90924;93704;96970;99537;100150	CP003903.1;122185;122369;4.300E-23;118;185;74.000;Candidatus Blochmannia chromaiodes str. 640;CP001733.2;941260;941728;8.938E-36;160;474;68.000;Aggregatibacter actinomycetemcomitans D11S-1;CP010049.1;113868;115326;0.000E+00;1079;1468;76.600;Blochmannia endosymbiont of Camponotus (Colobopsis) obliquus;CP008985.1;736616;736854;9.273E-46;193;247;80.000;Candidatus Baumannia cicadellinicola;CP010049.1…	8980;21070;197173;2664;52617;38190;138;78884;11991;27498;11287;63854;39576;53286;2552	0.286902286902287;0.305114638447972;0.32156862745098;0.374149659863946;0.326320939334638;0.29919028340081;0.333333333333333;0.303269003544703;0.284522003034901;0.28436018957346;0.284275755228505;0.301553672316384;0.326129666011788;0.389705882352941	0;NA;3	0;NA;1707	15
GAGA-0360.Scaffold6.10809620-10856712	GAGA-0360	Colobopsis minus	Formicinae	PacBio	NA	NA	NA	NA	Scaffold6	10809620	10856712	Scaffold6:10829620-10830224;Scaffold6:10830370-10833970;Scaffold6:10834284-10836712	10829620;10830370;10834284	10830224;10833970;10836712	CP010048.1;401286;401897;1.998E-68;268;612;68.500;Blochmannia endosymbiont of Polyrhachis (Hedomyrma) turneri;CP008985.1;533287;534474;6.915E-85;323;1188;67.300;Candidatus Baumannia cicadellinicola;AE013218.1;133483;134064;8.302E-84;320;582;72.800;Buchnera aphidicola str. Sg (Schizaphis graminum)	2168;30654;69515	0.261538461538462;0.240555555555556;0.255766062602965	NA	NA	3
GAGA-0360.Scaffold213.0-24386	GAGA-0360	Colobopsis minus	Formicinae	PacBio	NA	NA	NA	NA	Scaffold213	0	24386	Scaffold213:11785-14085;Scaffold213:14677-14940;Scaffold213:7899-9453;Scaffold213:9628-11023	11785;14677;7899;9628	14085;14940;9453;11023	CP003315.1;603631;604341;4.797E-87;330;717;71.200;Wigglesworthia glossinidia endosymbiont of Glossina morsitans morsitans (Yale colony);AE004439.1;175319;175575;2.310E-23;119;265;72.600;Pasteurella multocida subsp. multocida str. Pm70;CP010049.1;173983;175151;2.392E-101;378;1213;67.300;Blochmannia endosymbiont of Camponotus (Colobopsis) obliquus;AE016826.1;230664;231187;2.071E-27;132;524;66.000;B…	66273;771;2757;7240	0.339565217391304;0.330798479087452;0.288288288288288;0.27741935483871	0;NA	0;NA	4
GAGA-0360.Scaffold78.0-118240	GAGA-0360	Colobopsis minus	Formicinae	PacBio	NA	NA	NA	NA	Scaffold78	0	118240	Scaffold78:1417-2389;Scaffold78:16199-16771;Scaffold78:25249-28255;Scaffold78:2702-4865;Scaffold78:28816-32687;Scaffold78:32997-33930;Scaffold78:34119-36721;Scaffold78:36891-37681;Scaffold78:37806-39527;Scaffold78:39793-44204;Scaffold78:45005-46160;Scaffold78:46518-46903;Scaffold78:48084-48653;Scaffold78:49079-49794;Scaffold78:50075-51061;Scaffold78:52320-53805;Scaffold78:54047-56396;Scaffold78:5…	1417;16199;25249;2702;28816;32997;34119;36891;37806;39793;45005;46518;48084;49079;50075;52320;54047;57257;58472;60134;61192;62305;65112;66595;6780;68179;69771;70492;73038;78732;79625;81608;86483;87566;88389;88701;89836;91685;92527;92996;94825;96525;9865	2389;16771;28255;4865;32687;33930;36721;37681;39527;44204;46160;46903;48653;49794;51061;53805;56396;58126;58954;60338;62061;64708;66016;67819;7906;69195;70017;72497;78500;78904;80462;85126;86777;88248;88469;89295;90900;92355;92670;94322;96206;98240;10483	CP003547.1;895542;895992;4.147E-64;254;456;72.100;secondary endosymbiont of Heteropsylla cubana;CP000263.1;177196;177662;2.486E-26;129;473;68.500;Buchnera aphidicola BCc;CP010049.1;333213;333944;9.487E-158;565;733;77.500;Blochmannia endosymbiont of Camponotus (Colobopsis) obliquus;BA000021.3;437071;437866;5.523E-127;463;800;73.200;Wigglesworthia glossinidia endosymbiont of Glossina brevipalpis;BX…	11458;321;36259;78755;4383;16769;30917;759;44486;28880;744;250;749;215;5478;15373;49367;1584;685;348;9291;32097;2384;34106;1257;3022;768;85159;78360;78;1230;60260;301;4562;355;9285;13065;764;6113;2138;4479;65005;2028	0.244855967078189;0.263986013986014;0.298735861610113;0.26583448913546;0.242314647377939;0.285101822079314;0.279400461183705;0.241772151898734;0.269610691458454;0.222171843119474;0.221645021645022;0.288311688311688;0.256590509666081;0.202797202797203;0.241379310344828;0.263973063973064;0.285653469561516;0.238204833141542;0.267634854771784;0.259803921568627;0.264672036823936;0.29879317519767;0.316…	NA;0;2697;2569;2178;1901	NA;0;351;2670;2345;2129;1846	43
GAGA-0360.Scaffold344.0-6649	GAGA-0360	Colobopsis minus	Formicinae	PacBio	NA	NA	NA	NA	Scaffold344	0	6649	Scaffold344:1432-1739;Scaffold344:2438-2916;Scaffold344:624-762;Scaffold344:947-1142	1432;2438;624;947	1739;2916;762;1142	CP000238.1;202675;202973;7.721E-47;197;299;74.500;Baumannia cicadellinicola str. Hc (Homalodisca coagulata);CP010048.1;700997;701396;1.603E-25;126;400;68.600;Blochmannia endosymbiont of Polyrhachis (Hedomyrma) turneri;CP001085.1;38460;38557;1.384E-19;106;100;84.000;Candidatus Riesia pediculicola USDA;AE013218.1;279363;279469;4.625E-26;128;108;88.000;Buchnera aphidicola str. Sg (Schizaphis graminu…	1659;580;2471;6723	0.312703583061889;0.336820083682008;0.333333333333333;0.456410256410256	NA;0	NA;0	4
GAGA-0360.Scaffold1.7470670-7511775	GAGA-0360	Colobopsis minus	Formicinae	PacBio	NA	Sodalis_praecaptivus	Enterobacterales	Gammaproteobacteria	Scaffold1	7470670	7511775	Scaffold1:7490670-7491775	7490670	7491775	CP006569.1;583698;584535;1.539E-117;431;838;71.600;Sodalis praecaptivus	1787	0.466063348	21	24	1
GAGA-0360.Scaffold61.366757-408732	GAGA-0360	Colobopsis minus	Formicinae	PacBio	NA	NA	NA	NA	Scaffold61	366757	408732	Scaffold61:386757-387683;Scaffold61:388452-388732	386757;388452	387683;388732	CP002189.2;602123;602837;1.726E-45;192;715;66.600;Candidatus Blochmannia vafer str. BVAF;AP010872.1;91653;91941;2.071E-27;132;289;70.200;Candidatus Ishikawaella capsulata Mpkobe	4869;10829	0.271058315334773;0.275	NA;15	NA;16	2
GAGA-0360.Scaffold57.377529-492481	GAGA-0360	Colobopsis minus	Formicinae	PacBio	NA	NA	NA	NA	Scaffold57	377529	492481	Scaffold57:397529-398259;Scaffold57:399493-400226;Scaffold57:401068-401405;Scaffold57:401568-402750;Scaffold57:404238-404571;Scaffold57:405098-407911;Scaffold57:408183-411028;Scaffold57:411356-414595;Scaffold57:417816-419267;Scaffold57:419509-421206;Scaffold57:422511-423691;Scaffold57:424142-424469;Scaffold57:424651-425374;Scaffold57:426942-429678;Scaffold57:430011-432494;Scaffold57:434310-437390…	397529;399493;401068;401568;404238;405098;408183;411356;417816;419509;422511;424142;424651;426942;430011;434310;437848;439343;440710;442504;444266;445661;450602;483443;486125;488669	398259;400226;401405;402750;404571;407911;411028;414595;419267;421206;423691;424469;425374;429678;432494;437390;438767;440548;441539;443691;445185;448722;451621;484004;488336;489672	AL590842.1;1309317;1309964;1.790E-38;169;648;65.700;Yersinia pestis CO92;HG917868.1;455086;455411;1.437E-29;139;330;69.600;Clostridium bornimense;CP008985.1;124155;124495;4.304E-40;174;341;72.300;Candidatus Baumannia cicadellinicola;CP010049.1;404784;405707;3.417E-150;540;930;73.200;Blochmannia endosymbiont of Camponotus (Colobopsis) obliquus;CP008985.1;120895;121229;9.960E-15;90;335;66.200;Candi…	7329;1983;1623;6674;848;40452;18380;53318;12809;37117;2986;11708;526;5051;28148;26431;2130;2217;4862;7127;1288;24655;1000;488;3052;17228	0.29041095890411;0.23055934515689;0.258160237388724;0.257191201353638;0.246246246246246;0.279772484891575;0.276977152899824;0.284964495214572;0.237077877325982;0.266352386564526;0.260169491525424;0.394495412844037;0.273858921161826;0.246710526315789;0.26258558195731;0.258766233766234;0.262241566920566;0.258921161825726;0.30518697225573;0.259477674810446;0.260045736687357;0.273797841020608;0.29590…	0;NA	0;NA	26
GAGA-0360.Scaffold148.20476-51333	GAGA-0360	Colobopsis minus	Formicinae	PacBio	NA	NA	NA	NA	Scaffold148	20476	51333	Scaffold148:40476-41579;Scaffold148:42609-46337;Scaffold148:46675-47427;Scaffold148:47552-48029;Scaffold148:48187-49318;Scaffold148:49670-50810;Scaffold148:50947-51027	40476;42609;46675;47552;48187;49670;50947	41579;46337;47427;48029;49318;50810;51027	CP009253.1;278852;279099;1.854E-14;89;248;68.500;Buchnera aphidicola (Aphis glycines);CP002189.2;615663;616311;6.674E-58;234;649;68.400;Candidatus Blochmannia vafer str. BVAF;CP010049.1;658159;658820;5.166E-73;284;662;69.600;Blochmannia endosymbiont of Camponotus (Colobopsis) obliquus;CP003547.1;723394;723869;1.997E-34;156;479;67.700;secondary endosymbiont of Heteropsylla cubana;CP000016.1;675497…	2622;37656;1962;1222;2917;821;295	0.296464188576609;0.255096566523605;0.23936170212766;0.29979035639413;0.220159151193634;0.234210526315789;0.4125	NA	NA	7
GAGA-0360.Scaffold13.4841402-4927810	GAGA-0360	Colobopsis minus	Formicinae	PacBio	NA	NA	NA	NA	Scaffold13	4841402	4927810	Scaffold13:4861402-4867815;Scaffold13:4868054-4874455;Scaffold13:4875033-4876155;Scaffold13:4876658-4877984;Scaffold13:4878231-4878453;Scaffold13:4878738-4879260;Scaffold13:4880070-4881119;Scaffold13:4881678-4882250;Scaffold13:4883482-4883562;Scaffold13:4883708-4884385;Scaffold13:4885176-4885438;Scaffold13:4886827-4888302;Scaffold13:4888444-4890345;Scaffold13:4891509-4892318;Scaffold13:4893043-48…	4861402;4868054;4875033;4876658;4878231;4878738;4880070;4881678;4883482;4883708;4885176;4886827;4888444;4891509;4893043;4901781;4903046;4906080;4907638	4867815;4874455;4876155;4877984;4878453;4879260;4881119;4882250;4883562;4884385;4885438;4888302;4890345;4892318;4898831;4902853;4904934;4906917;4907810	CP007445.1;153254;153454;9.608E-22;113;201;72.900;Gilliamella apicola;CP001817.1;390052;390338;1.788E-21;113;287;70.000;Buchnera aphidicola (Cinara tujafilina);CP010049.1;253012;254035;7.381E-139;502;1024;70.800;Blochmannia endosymbiont of Camponotus (Colobopsis) obliquus;CP003488.1;2468345;2468472;3.207E-11;79;128;73.400;Providencia stuartii MRSN 2154;CP010049.1;256368;256588;2.675E-29;139;221;7…	205425;212166;3651;2068;12727;621;7003;9336;432;5677;149;829;42388;1101;6536;826;58354;1234;78	0.311398721347263;0.305577253554132;0.234402852049911;0.284313725490196;0.279279279279279;0.283524904214559;0.264061010486177;0.283216783216783;0.4125;0.293943870014771;0.240458015267176;0.243389830508475;0.293529721199369;0.250927070457355;0.264512785072564;0.232276119402985;0.297669491525424;0.252090800477897;0.284883720930233	NA;980;662;166;142;89	NA;962;532;166;104;88	19
GAGA-0360.Scaffold16.5888551-5930576	GAGA-0360	Colobopsis minus	Formicinae	PacBio	NA	NA	NA	NA	Scaffold16	5888551	5930576	Scaffold16:5908551-5908863;Scaffold16:5910001-5910576	5908551;5910001	5908863;5910576	CP005077.1;783963;784281;2.986E-42;182;319;73.900;Spiroplasma chrysopicola DF-1;CP011856.1;382867;383318;3.582E-24;122;452;66.900;Spiroplasma eriocheiris	829;774	0.217948717948718;0.248695652173913	14;11	14;11	2
GAGA-0360.Scaffold63.39853-88345	GAGA-0360	Colobopsis minus	Formicinae	PacBio	NA	NA	NA	NA	Scaffold63	39853	88345	Scaffold63:59853-60585;Scaffold63:61958-63316;Scaffold63:63519-64632;Scaffold63:65171-65888;Scaffold63:67944-68345	59853;61958;63519;65171;67944	60585;63316;64632;65888;68345	CP001085.1;363610;363765;2.482E-09;72;156;71.000;Candidatus Riesia pediculicola USDA;AP010872.1;182332;183594;1.719E-113;418;1263;67.700;Candidatus Ishikawaella capsulata Mpkobe;CP000263.1;303999;304465;5.559E-42;181;469;69.800;Buchnera aphidicola BCc;CP008985.1;188367;189074;2.150E-54;222;708;70.300;Candidatus Baumannia cicadellinicola;CP010048.1;286179;286583;7.165E-10;74;405;66.200;Blochmannia…	6872;9807;8592;1793;75	0.265027322404372;0.279823269513991;0.281221922731357;0.312412831241283;0.28428927680798	NA;0	NA;0	5
GAGA-0360.Scaffold13.632883-858961	GAGA-0360	Colobopsis minus	Formicinae	PacBio	NA	NA	NA	NA	Scaffold13	632883	858961	Scaffold13:675792-676520;Scaffold13:676815-677389;Scaffold13:677733-679179;Scaffold13:679562-682168;Scaffold13:682522-684123;Scaffold13:684347-684866;Scaffold13:685703-685784;Scaffold13:686047-686835;Scaffold13:688038-689029;Scaffold13:692862-693487;Scaffold13:693861-696209;Scaffold13:697070-697941;Scaffold13:698287-698769;Scaffold13:699950-700155;Scaffold13:700432-700636;Scaffold13:701816-702298…	675792;676815;677733;679562;682522;684347;685703;686047;688038;692862;693861;697070;698287;699950;700432;701816;702642;704374;706965;709709;711907;712968;713889;714657;716612;721309;723155;724101;726906;728049;733336;737115;740571;743055;743573;745501;747713;748392;750376;751808;753595;755061;756925;759534;762392;764199;766675;770367;774533;774920;779101;780219;782970;783620;783906;785896;787548;…	676520;677389;679179;682168;684123;684866;685784;686835;689029;693487;696209;697941;698769;700155;700636;702298;703513;706723;708450;710695;712700;713049;714411;715965;721043;723030;723970;726607;727839;732011;736566;739998;742734;743156;744542;747402;748214;749990;751653;752945;754940;756495;759222;761537;763982;766362;769818;774374;774672;778891;780034;782839;783285;783766;785630;787341;790307;…	BA000021.3;454733;455362;4.982E-46;194;630;69.400;Wigglesworthia glossinidia endosymbiont of Glossina brevipalpis;CP001085.1;358873;359458;2.486E-26;129;586;67.500;Candidatus Riesia pediculicola USDA;CP010049.1;318000;318770;9.930E-117;429;771;73.200;Blochmannia endosymbiont of Camponotus (Colobopsis) obliquus;CP010049.1;315182;316841;3.978E-122;447;1668;67.600;Blochmannia endosymbiont of Campono…	2398;130;46700;2946;972;94;71;697;4378;8071;39745;2134;400;170;174;612;1371;43477;14649;5237;549;193;841;30515;44011;956;28815;14031;5225;21100;83021;66896;97;14280;83523;1951;34998;17625;31890;3969;26027;34363;76031;8983;48179;61666;43379;73;6936;13038;21325;96;183;40891;39623;3257;1157;177;389;7179;2861;51619;154;27810;1112;7739;515;392;990;47489;1390;602	0.291208791208791;0.294425087108014;0.253803596127248;0.212586339217191;0.231105559025609;0.252408477842004;0.234567901234568;0.24238578680203;0.24217961654894;0.2784;0.285775127768313;0.237657864523536;0.267634854771784;0.258536585365854;0.259803921568627;0.285227756492124;0.264646464646465;0.240365111561866;0.239596469104666;0.246913580246914;0.24904214559387;0.224006116207951;0.222297449785601…	NA;41;3;183;205;250;222;233;2314;0	NA;16;1;181;232;220;248;224;2071;0	74
GAGA-0360.Scaffold13.8684908-8771457	GAGA-0360	Colobopsis minus	Formicinae	PacBio	NA	NA	NA	NA	Scaffold13	8684908	8771457	Scaffold13:8722374-8722596;Scaffold13:8722843-8724169;Scaffold13:8724672-8726000;Scaffold13:8726372-8732781;Scaffold13:8733020-8740192;Scaffold13:8740558-8740988;Scaffold13:8741331-8742754;Scaffold13:8750274-8751457	8722374;8722843;8724672;8726372;8733020;8740558;8741331;8750274	8722596;8724169;8726000;8732781;8740192;8740988;8742754;8751457	CP001607.1;2109161;2109271;3.451E-14;88;111;77.400;Aggregatibacter aphrophilus NJ8700;CP000238.1;431110;431345;4.621E-09;71;239;67.200;Baumannia cicadellinicola str. Hc (Homalodisca coagulata);CP000263.1;353892;354488;1.113E-44;190;597;68.300;Buchnera aphidicola BCc;AE016826.1;515747;516677;1.594E-127;465;931;70.600;Buchnera aphidicola str. Bp (Baizongia pistaciae);CP001817.1;390580;391863;3.563E…	6363;2214;3792;212201;228609;409;37187;19484	0.283783783783784;0.284313725490196;0.240210843373494;0.305507879544391;0.311628555493586;0.246511627906977;0.328882642304989;0.30262045646661	NA;0	NA;0	8
GAGA-0361.Scaffold26.0-418454	GAGA-0361	Camponotus fedtschenkoi	Formicinae	PacBio	NA	NA	NA	NA	Scaffold26	0	418454	Scaffold26:100190-101561;Scaffold26:102117-104010;Scaffold26:105341-106489;Scaffold26:106910-107213;Scaffold26:109083-109669;Scaffold26:109846-110404;Scaffold26:110958-113562;Scaffold26:113966-116863;Scaffold26:117009-117165;Scaffold26:117596-120506;Scaffold26:120767-121570;Scaffold26:121976-126347;Scaffold26:127095-128000;Scaffold26:12756-15726;Scaffold26:128343-130049;Scaffold26:130558-131996;S…	100190;102117;105341;106910;109083;109846;110958;113966;117009;117596;120767;121976;127095;12756;128343;130558;132122;134615;139219;140504;140832;142531;144051;152429;154418;155273;156455;157501;159615;161642;163879;164506;16597;168003;171077;172045;174697;177920;180170;184052;185434;186065;187632;188200;190026;19471;197446;199258;201087;213040;216578;217821;218466;220085;220596;222419;22360;2297…	101561;104010;106489;107213;109669;110404;113562;116863;117165;120506;121570;126347;128000;15726;130049;131996;132864;135426;140029;140615;141692;143226;150671;153926;155001;155715;157309;159310;160681;163484;164271;167669;18756;170801;171392;174417;177348;179716;183531;185264;185524;187294;187990;188756;197246;22246;198930;200911;201845;216063;217639;217944;219689;220371;221658;229592;23301;2312…	BA000021.3;565639;566424;4.147E-81;311;800;69.300;Wigglesworthia glossinidia endosymbiont of Glossina brevipalpis;BX248583.1;424163;425271;1.643E-154;554;1109;70.800;Candidatus Blochmannia floridanus;CP002189.2;438001;439157;2.518E-189;670;1157;73.600;Candidatus Blochmannia vafer str. BVAF;AM942759.1;751621;751847;5.554E-25;124;228;72.300;Proteus mirabilis HI4320;BX248583.1;431518;431862;1.664E-6…	24757;15348;10033;9036;1437;1840;50475;8263;133;7240;1061;48153;2406;28378;66176;3177;1471;5532;18630;71;19678;10943;71704;13578;7628;5210;1782;7164;11192;37025;247;17463;48265;37714;34228;27630;27508;25837;17460;4872;97;8328;10148;1298;66347;21403;8666;23265;8951;14506;3865;2139;9522;4631;4580;76438;386;10076;28499;5652;3334;1411;187642;145223;719;110416;7867;13567;2844;44383;2663;1705;31866;244…	0.280087527352298;0.266772319070259;0.279616724738676;0.260726072607261;0.245733788395904;0.272401433691756;0.261904761904762;0.258888505350362;0.211538461538462;0.26254295532646;0.261519302615193;0.298329901624342;0.282872928176796;0.277777777777778;0.296600234466589;0.32336578581363;0.280323450134771;0.282367447595561;0.311111111111111;0.306306306306306;0.296511627906977;0.293525179856115;0.293…	NA;330;63;0;191;226;108;279;311;328;262;300;321;190;372	NA;340;104;0;166;219;290;125;271;38;341;335;318;252;256;361;244;394	151
GAGA-0361.Scaffold6.45830-149483	GAGA-0361	Camponotus fedtschenkoi	Formicinae	PacBio	NA	NA	NA	NA	Scaffold6	45830	149483	Scaffold6:101303-102269;Scaffold6:103017-107388;Scaffold6:107793-108597;Scaffold6:108858-111768;Scaffold6:112199-115609;Scaffold6:129363-129483;Scaffold6:65830-66454;Scaffold6:68031-68794;Scaffold6:69567-70246;Scaffold6:70377-70713;Scaffold6:71236-72320;Scaffold6:75150-75893;Scaffold6:76203-76938;Scaffold6:77139-77959;Scaffold6:78431-78519;Scaffold6:78643-78738;Scaffold6:78920-79768;Scaffold6:800…	101303;103017;107793;108858;112199;129363;65830;68031;69567;70377;71236;75150;76203;77139;78431;78643;78920;80045;80795;82417;86109;87644;88721;89437;93610;94639;94858;95417;96423;97478;99347	102269;107388;108597;111768;115609;129483;66454;68794;70246;70713;72320;75893;76938;77959;78519;78738;79768;80602;82238;85285;86805;88504;88967;90763;94446;94734;94946;96222;97123;98399;101039	CP003903.1;497361;497638;2.880E-49;205;278;76.900;Candidatus Blochmannia chromaiodes str. 640;CP003903.1;494729;495711;1.757E-174;621;985;74.300;Candidatus Blochmannia chromaiodes str. 640;BX248583.1;443748;444441;3.700E-119;437;694;74.600;Candidatus Blochmannia floridanus;CP002189.2;453300;454192;1.650E-137;498;894;72.700;Candidatus Blochmannia vafer str. BVAF;BX248583.1;439754;439990;1.288E-33;…	1108;55218;1208;9006;11461;200;407;667;255;207;515;5507;409;15560;735;621;6181;12726;17409;12527;7538;10615;156;4651;3271;1332;1271;17883;395;4876;65655	0.273291925465839;0.298329901624342;0.261194029850746;0.26254295532646;0.251319648093842;0.241666666666667;0.229166666666667;0.249017038007864;0.278350515463918;0.25297619047619;0.29520295202952;0.297442799461642;0.293877551020408;0.321951219512195;0.375;0.442105263157895;0.266509433962264;0.292639138240575;0.274428274428274;0.299163179916318;0.294540229885057;0.296511627906977;0.317073170731707;…	NA;0;15;21;23	NA;0;19;25;168	31
GAGA-0361.Scaffold41.103105-174758	GAGA-0361	Camponotus fedtschenkoi	Formicinae	PacBio	NA	NA	NA	NA	Scaffold41	103105	174758	Scaffold41:123105-130830;Scaffold41:131056-131517;Scaffold41:131953-132529;Scaffold41:132788-133822;Scaffold41:134048-135185;Scaffold41:136280-139075;Scaffold41:139535-141401;Scaffold41:141940-142631;Scaffold41:143116-146185;Scaffold41:147505-148674;Scaffold41:149157-149621;Scaffold41:150874-151354;Scaffold41:151760-152669;Scaffold41:153227-153868;Scaffold41:154170-154758	123105;131056;131953;132788;134048;136280;139535;141940;143116;147505;149157;150874;151760;153227;154170	130830;131517;132529;133822;135185;139075;141401;142631;146185;148674;149621;151354;152669;153868;154758	BA000003.2;630413;630809;5.559E-42;181;397;68.500;Buchnera aphidicola str. APS (Acyrthosiphon pisum);CP002284.1;2525944;2526155;3.996E-20;108;212;71.300;Vibrio anguillarum 775;CP003903.1;738829;739377;5.168E-56;227;549;69.400;Candidatus Blochmannia chromaiodes str. 640;AE016826.1;52649;53564;1.034E-75;293;926;67.600;Buchnera aphidicola str. Bp (Baizongia pistaciae);CP010049.1;726135;726896;1.238E…	149699;6932;933;16111;1761;34431;12133;348;9714;1373;1131;1433;1552;4591;648	0.324559128630705;0.336225596529284;0.288194444444444;0.266924564796905;0.321020228671944;0.277996422182469;0.304930332261522;0.237337192474674;0.26099706744868;0.27715996578272;0.258620689655172;0.277083333333333;0.262926292629263;0.258970358814353;0.248299319727891	NA	NA	15
GAGA-0361.Scaffold59.130245-194748	GAGA-0361	Camponotus fedtschenkoi	Formicinae	PacBio	NA	NA	NA	NA	Scaffold59	130245	194748	Scaffold59:170508-171041;Scaffold59:171187-173292;Scaffold59:173462-174748	170508;171187;173462	171041;173292;174748	CP003903.1;703875;704361;2.150E-54;222;492;72.800;Candidatus Blochmannia chromaiodes str. 640;CP007445.1;2894800;2895114;1.995E-17;99;315;70.000;Gilliamella apicola;BA000021.3;594629;595660;1.719E-113;418;1032;72.200;Wigglesworthia glossinidia endosymbiont of Glossina brevipalpis	1606;17630;15855	0.350844277673546;0.351543942992874;0.341368584758942	NA	NA	3
GAGA-0361.Scaffold11.4036231-4076680	GAGA-0361	Camponotus fedtschenkoi	Formicinae	PacBio	NA	NA	NA	NA	Scaffold11	4036231	4076680	Scaffold11:4056231-4056680	4056231	4056680	CP002189.2;57355;57612;2.580E-36;162;258;74.300;Candidatus Blochmannia vafer str. BVAF	571	0.325167038	10	10	1
GAGA-0361.Scaffold24.1439618-1479775	GAGA-0361	Camponotus fedtschenkoi	Formicinae	PacBio	NA	NA	NA	NA	Scaffold24	1439618	1479775	Scaffold24:1459618-1459775	1459618	1459775	AP012554.1;1982;2140;1.242E-57;233;159;92.400;Candidatus Pantoea carbekii	1340	0.445859873	9	8	1
GAGA-0361.Scaffold32.1115656-1155840	GAGA-0361	Camponotus fedtschenkoi	Formicinae	PacBio	NA	NA	NA	NA	Scaffold32	1115656	1155840	Scaffold32:1135656-1135840	1135656	1135840	BX248583.1;188291;188476;1.664E-35;159;186;80.100;Candidatus Blochmannia floridanus	536	0.260869565	4	4	1
[truncated: 526 more rows]
