# Supplementary material for: Recurrent horizontal gene acquisition in the evolutionary history of ants
Source: Research Square preprint supplement (doi:10.21203/rs.3.rs-5741203/v1), 2025-01-13
Supplement: Supplementary file 7 [file c25af9466053f36c3305422a.xlsx]

## Sheet: Other_HGAs
HGA_name	locus	.id	scaffold	species	subfamily	reads.start	reads.end	reads.complete	locus.length	locus.start	locus.end	CDS.length	CDS.start	CDS.stop	strand	RNAseq.count	CDS.start.codon	CDS.stop.codon	UniprotID	Protein.name	prokaryote_origin	order_prokaryote_origin	PCR	comment
A. D-alanine--D-alanine ligase	GAGA-0463.Scaffold25.3133505-3134642	GAGA-0463	Scaffold25	Formicoxenus nitidulus	Myrmicinae	33	33	28	1137	3133505	3134642	1119	3133525	3134643	+	4514	ATG	TAA	W0HVG4	D-alanine--D-alanine ligase	Sodalis sp.	Enterobacterales	verified	HQ candidate
	GAGA-0098.Scaffold8.1328058-1329239	GAGA-0098	Scaffold8	Harpagoxenus sublaevis	Myrmicinae	27	28	21	1181	1328058	1329239	1119	1328122	1329240	+	132	ATG	TAA	W0HVG4	D-alanine--D-alanine ligase	Sodalis sp.	Enterobacterales	verified	HQ candidate
	GAGA-0099.Scaffold131.530530-531708	GAGA-0099	Scaffold131	Leptothorax acervorum	Myrmicinae	41	29	NA	1178	530530	531708	1119	530528	531646	-	NA	ATG	TAA	W0HVG4	D-alanine--D-alanine ligase	Sodalis sp.	Enterobacterales	NA	re-detected by BLAST
B. UDP-N-acetylglucosamine 1-carboxyvinyltransferase	GAGA-0080.Scaffold7.277737-279231	GAGA-0080	Scaffold7	Pheidole pallidula	Myrmicinae	53	55	49	1494	277737	279231	1374	277855	279228	-	395	ATG	TGA	A0A060Q018	UDP-N-acetylglucosamine 1-carboxyvinyltransferase	Wolbachia	Rickettsiales	NA	HQ candidate
C. Putative Phenazine biosynthesis protein	GAGA-0528.Scaffold97.419863-420872	GAGA-0528	Scaffold97	Liometopum microcephalum	Dolichoderinae	93	100	87	1009	419863	420872	881	419986	420867	+	4212	ATG	TAG	W0HPC4	Putative phenazine biosynthesis protein	Sodalis praecaptivus	Enterobacterales	verified	HQ candidate, potential intron incorporation
D. Aryl-sulfate sulfotransferase	GAGA-0360.Scaffold1.7490670-7491775	GAGA-0360	Scaffold1	Colobopsis sp.	Formicinae	21	24	21	1105	7490670	7491775	1134	7490661	7491794	+	3866	TTG	TAA	W0HTS9	PQQ enzyme repeat protein	Sodalis praecaptivus	Enterobacterales	NA	HQ candidate, new name Aryl sulfotransferase, based on bacterial reference sequences
E. DNA helicase	GAGA-0543.Scaffold14.1894874-1897946	GAGA-0543	Scaffold14	Kalathomyrmex emeryi	Myrmicinae	64	58	55	3072	1894874	1897946	1914	1895964	1897877	-	5701	ATG	TAG	B3CMH9	DNA helicase	Wolbachia	Rickettsiales	verified	HQ candidate
	GAGA-0307.Scaffold17.5138154-5140217	GAGA-0307	Scaffold17	Hypoponera opacior	Ponerinae	48	46	42	2063	5138154	5140217	1929	5138219	5140147	+	2416	ATG	TAA	B3CMH9	DNA helicase	Wolbachia	Rickettsiales	verified	HQ candidate
	GAGA-0386.Scaffold5597.1593-4767	GAGA-0386	Scaffold5597	Euponera pilosior	Ponerinae	NA	NA	NA	3174	1593	4767	1929	2077	4005	+	NA	ATG	GAA	B3CMH9	DNA helicase	Wolbachia	Rickettsiales	NA	re-detected by BLAST, stLFR assembly
F. Xanthine-guanine phosphoribosyltransferase	GAGA-0515.Scaffold8.1760778-1761241	GAGA-0515	Scaffold8	Cardiocondyla obscurior	Myrmicinae	57	54	53	463	1760778	1761241	492	1760751	1761243	-	20062	ATG	TAT	A0A7C8GK68	Xanthine-guanine phosphoribosyltransferase (XGPRT)	Westeberhardia cardiocondylae	Enterobacterales	verified	HGT lost in W. cardiocondylae; HQ candidate
