# Supplementary material for: Recurrent horizontal gene acquisition in the evolutionary history of ants
Source: Research Square preprint supplement (doi:10.21203/rs.3.rs-5741203/v1), 2025-01-13
Supplement: Supplementary file 8 [file cff67b5fe5c76cf7f6241335.xlsx]

## Sheet: Lysozymes_HGAs
locusID	.id	locus.scaffold	locus.position	species	subfamily	CDS.start	CDS.end	CDS.length	Expression	startCodon	stopCodon	q_cov	s_cov	CDS.UniprotIDs	Protein.name	CDS.Eval	Detection	Note
GAGA-0098.Scaffold31.1152742-1153911	GAGA-0098	Scaffold31	1152742-1153911	Harpagoxenus sublaevis	Myrmicinae	1153305	1153928	623	117	ATG	TAA	96.1	36	A0A6H2NU06	DUF1016 family protein	2.50E-93	Directly classified as HQ candidate
GAGA-0099.Scaffold20.2658162-2659328	GAGA-0099	Scaffold20	2658162-2659328	Leptothorax acervorum	Myrmicinae	2658144	2658767	623	378	ATG	TAA	96.1	36	A0A6H2NU06	DUF1016 family protein	1.10E-91	Directly classified as HQ candidate
GAGA-0103.Scaffold3.176889-177498	GAGA-0103	Scaffold3	176889-177498	Myrmecina graminicola	Myrmicinae	176889	177503	614	400	ATG	TGA	97.5	36	A0A6H2NU06	DUF1016 family protein	2.60E-90	Directly classified as HQ candidate
GAGA-0222.Scaffold8.5584886-5586057	GAGA-0222	Scaffold8	5584886-5586057	Temnothorax rugatulus	Myrmicinae	5584934	5585551	617	3354	ATG	TGA	97.1	36	A0A6H2NU06	DUF1016 family protein	6.4e-92	Directly classified as HQ candidate
GAGA-0223.Scaffold1.1848750-1849914	GAGA-0223	Scaffold1	1848750-1849914	Temnothorax longispinosus	Myrmicinae	1848806	1849423	617	3111	ATG	TGA	97.1	36	A0A6H2NU06	DUF1016 family protein	4.4e-93	Directly classified as HQ candidate
GAGA-0224.Scaffold2.5523877-5525052	GAGA-0224	Scaffold2	5523877-5525052	Temnothorax americanus	Myrmicinae	5524378	5524995	617	316	ATG	TGA	97.1	36	A0A6H2NU06	DUF1016 family protein	1.7e-92	Directly classified as HQ candidate
GAGA-0256.Scaffold2.7916318-7917363	GAGA-0256	Scaffold2	7916318-7917363	Acanthomyrmex cf. ferox	Myrmicinae	7916749	7917363	614		ATG	TAG	97.5	36	A0A6H2NU06	DUF1016 family protein	1.30E-92	Directly classified as HQ candidate
GAGA-0288.Scaffold13.4154918-4156109	GAGA-0288	Scaffold13	4154918-4156109	Temnothorax unifasciatus	Myrmicinae	4154974	4155591	617	200	ATG	TGA	97.1	36	A0A6H2NU06	DUF1016 family protein	4.6e-90	Directly classified as HQ candidate
GAGA-0328.Scaffold36.505675-506652	GAGA-0328	Scaffold36	505675-506652	Carebara diversa	Myrmicinae	505676	506293	617	12297	ATG	TGA	97.1	36	A0A6H2NU06	DUF1016 family protein	1.30E-89	Directly classified as HQ candidate
GAGA-0331.Scaffold2506.5741-6367	GAGA-0331	Scaffold2506	5741-6367	Carebara sp. s2	Myrmicinae	5741	6367	626		ATG	TAA			P25310	Lyzozyme M1		All genome BLAST search	stLFR genome
GAGA-0378.Scaffold29.1055831-1057476	GAGA-0378	Scaffold29	1055831-1057476	Carebara altinodus	Myrmicinae	1056536	1057153	617	1234	ATG	TAA	97.6	36	A0A6H2NU06	DUF1016 family protein	1.6e-90	Directly classified as HQ candidate
GAGA-0382.Scaffold1.29205332-29206276	GAGA-0382	Scaffold1	29205332-29206276	Carebara trechideros	Myrmicinae	29205657	29206274	617		ATG	TGA			P26836	Probable autolytic lysozyme		All genome BLAST search	E-value filter threshold not fulfilled
GAGA-0407.Scaffold17.737281-738661	GAGA-0407	Scaffold17	737281-738661	Kartidris nyos	Myrmicinae	738017	738634	617	545	ATG	TGA	96.6	35.8	A0A6H2NU06	DUF1016 family protein	1.1e-91	Directly classified as HQ candidate
GAGA-0463.Scaffold5.10066752-10067894	GAGA-0463	Scaffold5	10066752-10067894	Formicoxenus nitidulus	Myrmicinae	10067288	10067911	623	2232	ATG	TAA	96.1	36	A0A6H2NU06	DUF1016 family protein	5.20E-91	Directly classified as HQ candidate
GAGA-0510.Scaffold38.1250818-1251998	GAGA-0510	Scaffold38	1250818-1251998	Temnothorax nylanderi	Myrmicinae	1251324	1251941	617	1280	ATG	TGA	97.1	36	A0A6H2NU06	DUF1016 family protein	6.4e-92	Directly classified as HQ candidate
GAGA-0511.Scaffold84.595202-596389	GAGA-0511	Scaffold84	595202-596389	Myrmoxenus ravouxi	Myrmicinae	595715	596332	617	222	ATG	TGA	97.1	36	A0A6H2NU06	DUF1016 family protein	1.2e-93	Directly classified as HQ candidate
GAGA-0512.Scaffold4.5227523-5228691	GAGA-0512	Scaffold4	5227523-5228691	Temnothorax pilagens	Myrmicinae	5227579	5228196	617	411	ATG	TGA	97.1	36	A0A6H2NU06	DUF1016 family protein	1.3e-92	Directly classified as HQ candidate
GAGA-0513.Scaffold6.3022732-3024790	GAGA-0513	Scaffold6	3022732-3024790	Temnothorax ambiguus	Myrmicinae	3022788	3023405	617	246	ATG	TGA	97.1	36	A0A6H2NU06	DUF1016 family protein	7.5e-93	Directly classified as HQ candidate
GAGA-0533.Scaffold25.1172728-1173697	GAGA-0533	Scaffold25	1172728-1173697	Carebara lignata	Myrmicinae	1173035	1173184	149	1682	ATG	TAG	91.8	23.6	M9WWV9	Lyzozyme M1	5.90E-10	Directly classified as HQ candidate
GAGA-0578.Scaffold3.7430181-7431567	GAGA-0578	Scaffold3	7430181-7431567	Carebara capreola	Myrmicinae	7430233	7430847	614	868	ATG	TAA	98.5	36.3	A0A6H2NU06	DUF1016 family protein	1.7e-92	Directly classified as HQ candidate
GAGA-0579.Scaffold2.762140-763897	GAGA-0579	Scaffold2	762140-763897	Carebara melasolena	Myrmicinae	763194	763511	317	545	ATG	TGA	97.1	44.2	Q4EDF3	Glycosyl hydrolases 25 family protein (Lysozyme) (EC 3.2.1.17)	7.2e-37	Directly classified as HQ candidate
