# Supplementary material for: Recurrent horizontal gene acquisition in the evolutionary history of ants
Source: Research Square preprint supplement (doi:10.21203/rs.3.rs-5741203/v1), 2025-01-13
Supplement: Supplementary file 9 [file d48348efe3237a8932acd435.xlsx]

## Sheet: Tab.S3_HGT_PCR
Table S2. The list of PCR validations		* NA indicates that the full HGT was covered by Primer 1.
GAGA_id	species	subfamily	HGT_locus	CDS_UniprotID	Protein_names	5' upstream_HGT_Primer_1_F	5' upstream_HGT_Primer_1_R	PCR_product_size	3' downstream_HGT_Primer_2_F	3' downstream_HGT_Primer_2_R	PCR_product_size	PCR	Sanger_Seq
GAGA-0080	Pheidole pallidula	Myrmicinae	GAGA-0080.Scaffold7.285141-285763	Q5GRP7	3-oxoacyl-[acyl-carrier-protein] synthase 2	TCGATAGCGAGCAACTCACC	ATCACATCACGGCACCACAT	946 bp	ACCACCAAAACCGAACGAGT	TGTGACTCCGGTCTCCTGAT	812 bp	+	+
GAGA-0080	Pheidole pallidula	Myrmicinae	GAGA-0080.Scaffold7.277737-279231	A0A060Q018	UDP-N-acetylglucosamine 1-carboxyvinyltransferase	ACCTGTCCTCGTAACCCGTA	TGAACTGCATGATGGAGGCA	741 bp	TTGCACCCACCAGGAAATGT	AGGCGAGGTAGCTATTCTGC	412 bp	+	+
GAGA-0082	Pristomyrmex punctatus	Myrmicinae	GAGA-0082.Scaffold4.12809954-12810948	A0A060PZL0	R polymerase sigma factor RpoD (Sigma-70)	TACGATTGCATGACGGCTGT	TGCGTATTCTCTCCAAAGGT	864 bp	ACCTTTGGAGAGAATACGCA	TCAAGATTTTGCTCCCATTGT	822 bp	+	+
GAGA-0099	Leptothorax acervorum	Myrmicinae	GAGA-0099.Scaffold4.5620327-5620504	A0A556QVC9	AAA-ATPase_like domain-containing protein	GTTCGTGGGAGAGGTTGCTT	ACATCCTACCCAGCAGAGCA	886 bp	NA*	NA*	NA*	+	+
GAGA-0099	Leptothorax acervorum	Myrmicinae	GAGA-0099.Scaffold20.2658162-2659328	A0A6H2NU06	DUF1016 family protein	TGAGACATGTTTCTCCCAGCA	TCATAAAGCAACCCAAGGGCT	738 bp	TCTTCGGCGGCTTTTCTTCT	TAGTGAATATCGGCACCGGC	780 bp	+	+
GAGA-0103	Myrmecina graminicola	Myrmicinae	GAGA-0103.Scaffold5.80024-82112	A0A369RLE9	Alginate biosynthesis protein AlgA	GTGAAACAAATGTGGACATGGA	GAGGAGGAATGACCGTGAGC	890 bp	NA*	NA*	NA*	+	+
GAGA-0103	Myrmecina graminicola	Myrmicinae	GAGA-0103.Scaffold3.176889-177498	A0A6H2NU06	DUF1016 family protein	ATGAACAGAATGCAATTGCCGT	ATCTGGACGATTGGCGCAAA	887 bp	ATAAGTTCGTGCTTTGCGCC	TAACACAACGTGGTGGGACA	717 bp	-	-
GAGA-0114	Manica rubida	Myrmicinae	GAGA-0114.Scaffold14.427045-427585	A0A060Q4P0	Protein ApaG	TTACCTTCACCCAACACCCA	GGTGTTGTCTTCCCACCATG	745 bp	NA*	NA*	NA*	-	-
GAGA-0114	Manica rubida	Myrmicinae	GAGA-0114.Scaffold14.445809-447697	A0A060Q4D5	N5-carboxyaminoimidazole ribonucleotide synthase (N5-CAIR synthase)	ACCGACTAAGGTTGCCTTCA	ACATTACACGCGTCCAAGCT	704 bp	TCCCATAGCAGAAAACCACCA	TAAGAGCCCGTTGAGCCAAG	824 bp	-	-
GAGA-0177	Lasius niger	Formicinae	GAGA-0177.Scaffold10.12034628-12035035	A0A218KR71	Ribonuclease 3 (Ribonuclease III) (Rse III)	TGGCGATTACTCCATGCGAT	CGAACAACAGGCAGCGAAAC	913 bp	GCCTGTTGTTCGGCAGTTTT	CCTTCTGCGCTTCTCCCATT	874 bp	+	+
GAGA-0200	Camponotus japonicus	Formicinae	GAGA-0200.Scaffold27.1009029-1849104	NA	NA	TGCGCGCAATAGAACCTGTA	ACATTCCGTTTGCGCACAAA	505 bp	ACCACCAGATGCCCCTGATA	CCCAGGCTTGGTTTTCGAGA	676 bp	+	+
GAGA-0221	Camponotus fellah	Formicinae	GAGA-0221.Scaffold3.8820002-8820310	A0A0H3XH70	N-acetylmuramic acid 6-phosphate etherase	TGCAGCAATTCCAATCACAGT	CAATTCATGCATTGGATGGATTTTT	750 bp	CTTCCGCACCTTCAATTGGC	ACCAAGATTGATACAGAACAACGT	300 bp	+	+
GAGA-0222	Temnothorax rugatulus	Myrmicinae	GAGA-0222.Scaffold97.528511-528911	A0A369RL79	TDisulfide bond formation protein D	TTTTGTCGCCTTGCCACAAT	TCAGTGCATCCTCTTTTGGGT	811 bp	NA*	NA*	NA*	+	+
GAGA-0222	Temnothorax rugatulus	Myrmicinae	GAGA-0222.Scaffold8.5584886-5586057	A0A6H2NU06	DUF1016 family protein	AGCAAAATCAGTCAGACTTCGT	GATCTGTCGCACTGGAACCA	888 bp	AGTCCTTGGGTTGCTTTGTGA	TGCAGAATTTTTATCTTTCAGCGGA	851 bp	+	+
GAGA-0223	Temnothorax longispinosus	Myrmicinae	GAGA-0223.Scaffold39.1542631-1542813	A0A345PN33	Putative AAA-ATPase	ACGTGGTTCGCGATACAAGT	TCATTTCGGTCCGTCAACGT	910 bp	ACGTTGACGGACCGAAATGA	CCGAAGGCGAGTTGAATTTTCA	947 bp	-	-
GAGA-0223	Temnothorax longispinosus	Myrmicinae	GAGA-0223.Scaffold1.18487050-1849914	A0A6H2NU06	DUF1016 family protein	TCGCGCGAGATATGTGCTTA	GGAGAAGACGGCAAAGACCA	823 bp	CCCAATCCACATCCTCAGCT	CGTAGAAGTCTCGTATTTTTGGTCA	758 bp	+	+
GAGA-0223	Temnothorax longispinosus	Myrmicinae	GAGA-0223.Scaffold10.2118171-2118355	A0A345PN33	Putative AAA-ATPase	AGTCCCCAACGACTTCATGC	TCCGCTATACGCAACTAGTCT	898 bp	ACGACGTTAAGATTAGCAAAGCA	GGCCGGAGATTGGGAAAGAA	826 bp	+	+
GAGA-0224	Temnothorax americanus	Myrmicinae	GAGA-0224.Scaffold2.5523877-5525052	A0A6H2NU06	DUF1016 family protein	TGTGACGTTTCAGGTGCAGA	ATGTTGATGACGCACACCCT	914 bp	CAGCGAATACCGGCATTACC	TAGCCCTTGGGTTGCTTTGT	683 bp	+	+
GAGA-0229	Cephalotes cf. minutus	Myrmicinae	GAGA-0229.Scaffold57.164617-165538	A0A060Q4M2	Protein-export membrane protein SecF	CACATGACGTCGATGCGATG	CCCTAAGCCCACATTGCCAA	990 bp	NA*	NA*	NA*	-	-
GAGA-0229	Cephalotes cf. minutus	Myrmicinae	GAGA-0229.Scaffold57.170082-179129	A0A060PWN	6,7-dimethyl-8-ribityllumazine synthase	CGATGTAGTTGAGGTTCCTGGT	CGCTTCTGAACTGCCAAGGA	801 bp	NA*	NA*	NA*	+	+
GAGA-0229	Cephalotes cf. minutus	Myrmicinae	GAGA-0229.Scaffold18.2465400-2465653	A0A0H3XH93	Aspartate carbamoyltransferase	CCCTTCAGTAATCACGACGCT	CGGAAATCACCACGTCAGGA	994 bp	NA*	NA*	NA*	-	-
GAGA-0307	Hypoponera opacior	Ponerinae	GAGA-0307.Scaffold17.5138154-5140217	B3CMH9	DNA helicase	AGGCATTGAAGCACTAGGTA	TGCCACTGATGCATAAGCCT	866 bp	AAACGAGCCAAAACGAAGCA	ACACTTTGGATGTAACACAACA	872 bp	+	+
GAGA-0346	Megalomyrmex milee	Myrmicinae	GAGA-0346.Scaffold1.5185728-5186197	A0A3M2EQF0	3-oxoacyl-[acyl-carrier-protein] synthase 2	AGTGATGTTCTCTCGCCAAGG	ATCGTATCTTCCAGGCGACG	802 bp	NA*	NA*	NA*	+	+
GAGA-0454	Solenopsis fugax	Myrmicinae	GAGA-0454.Scaffold251.155922-156404	A0A218KPU2	OTU domain-containing protein	ACACCTTCCCAGAAAGCATCT	ACAAATCCAAAATATCAGAATG	818 bp	CCTTTCGTTATCCCTTTGCTGA	CGCGCAGTTTGTTATCGAGG	845 bp	+	+
GAGA-0463	Formicoxenus nitidulus	Myrmicinae	GAGA-0463.Scaffold5.10066752-10067894	A0A6H2NU06	DUF1016 family protein	TGAATATCGGCACCGGCATT	TCCAGTTGCCTCGTGAACTC	950 bp	TCACACTGGAACCAAAGCGT	ACGCACCATCCTTGTCTCAG	643 bp	+	+
GAGA-0463	Formicoxenus nitidulus	Myrmicinae	GAGA-0463.Scaffold25.3133505-3134642	W0HVG4	D-alanine--D-alanine ligase (D-Ala-D-Ala ligase)	TCGTCGGCGTTTACCAATGA	CAGTACCCGCTTGGCCATAT	884 bp	AACATACCCTTTGCCGGACC	GGATGTGGTGTCCAGGTTGT	801 bp	+	+
GAGA-0463	Formicoxenus nitidulus	Myrmicinae	GAGA-0463.Scaffold48.1375518-1376844	A0A060PY40	Succite dehydrogese cytochrome b556 subunit	GCAAGAGTTATATAAGTGATGCCCT	TGCACAATGCTGCTGTCTTT	706 bp	NA*	NA*	NA*	+	+
GAGA-0463	Formicoxenus nitidulus	Myrmicinae	GAGA-0463.Scaffold87.542630-542813	A0A556QWV4	AAA-ATPase_like domain-containing protein	ATTTCACGTCTACCGCACCG	TATCGAGCTTCTGCCGGTAC	747 bp	NA*	NA*	NA*	+	+
GAGA-0485	Formica sanguinea	Formicinae	GAGA-0485.Scaffold6.5437357-5438799	A0A151ULI1	Cyclopropane fatty acyl phospholipid synthase	CGTATATCAACGCATGCGCA	TATGGCGTTAGGGTGCATGG	762 bp	CGTTATCTTGAAAGCGCGGG	ATCGCTCTGTAGGCAATCGG	850 bp	+	+
GAGA-0485	Formica sanguinea	Formicinae	GAGA-0485.Scaffold19.2863851-2864103	W0GSI6	Ribosomal R small subunit methyltransferase A	GATACGCGCGCATGAATGTT	CTCTGCCTGCTTGATTGGGA	756 bp	CCCAATCAAGCAGGCAGAGA	ATCGGGCAGCTCTCTACAGA	953 bp	+	+
GAGA-0485	Formica sanguinea	Formicinae	GAGA-0485.Scaffold4.8837683-8839152	A0A151ULI1	Cyclopropane fatty acyl phospholipid synthase	GCCTGGCTTTTCCTGACGA	GAACAAGACCGGACAGAGGG	939 bp	NA*	NA*	NA*	+	+
GAGA-0485	Formica sanguinea	Formicinae	GAGA-0485.Scaffold4.8848842-8849572	A0A151ULI1	Cyclopropane fatty acyl phospholipid synthase	CATCTTACGTGCCGGATTACA	GGCTCCAAAAACTGTTCTCGC	804 bp	NA*	NA*	NA*	+	+
GAGA-0502	Iberoformica subrufa	Formicinae	GAGA-0502.Scaffold15.2279751-2280007	W0GSI6	Ribosomal R small subunit methyltransferase A	CGCGCGCATGAATGTTTCTA	AGCTCACCCTTGGTAACGTG	800 bp	NA*	NA*	NA*	+	+
GAGA-0502	Iberoformica subrufa	Formicinae	GAGA-0502.Scaffold7.8320662-8321878	A0A151ULI1	Cyclopropane fatty acyl phospholipid synthase	CCGCTGTGGAAACGATACATT	AGTCATGCCAGGTTGCAGTT	807 bp	ACCTGGCATGACTCTGTTGG	TGCAAAGCAAAGACAGCGTG	863 bp	+	+
GAGA-0505	Goniomma hispanicum	Myrmicinae	GAGA-0505.Scaffold84.55509-55735	A0A225X7N9	Protein translocase subunit SecY	GTTCGAGTCGGGTGGTTCTC	AGAATGAATAGGGAAGGGGCA	303 bp	GGATTACAATTAATGCCCCTTCCC	GCGCTCTCACTTACCTCCAT	301 bp	+	+
GAGA-0510	Temnothorax nylanderi	Myrmicinae	GAGA-0510.Scaffold38.1250818-1251998	A0A6H2NU06	DUF1016 family protein	ACATGAAATTGATCAACCGTACCT	TGGTTCCAGTGCGACAGATC	735 bp	GGAGAAGACGGCAAAGACCA	TCCCCAAGCAAAATCAGTCAGA	717 bp	+	+
GAGA-0511	Myrmoxenus ravouxi	Myrmicinae	GAGA-0511.Scaffold84.595202-596389	A0A6H2NU06	DUF1016 family protein	TGATCAACCGTCTATACTGTCTGT	TCTTTATTTAGCAGAGCAGCTGT	700 bp	GGATTGGCCCATGTGATCGA	TCGCGCGAGATATGTGCTTA	429 bp	+	+
GAGA-0515	Cardiocondyla obscurior	Myrmicinae	GAGA-0515.Scaffold8.1760778-1761241	A0A7C8GK68	Xanthine-guanine phosphoribosyltransferase	ATCGAAAGTCGAGGAAATAACGG	TGCTCGGTGTCGAGGTTTTT	963 bp	AGTATCGAAAGTCGAGGAAATAACG	CGCCAGTACGTCCTCATGTT	813 bp	+	+
GAGA-0528	Liometopum microcephalum	Dolichoderinae	GAGA-0528.Scaffold97.419863-420872	W0HPC4	Putative phenazine biosynthesis protein	ACTGCGCGAGAATTCCCTTT	TGATGTGGCCCTCGATCAAC	924 bp	CGCTGTCCGAAGCAGACTAT	AGGCCTAGCAATTTTGAAGT	929 bp	+	+
GAGA-0528	Liometopum microcephalum	Dolichoderinae	GAGA-0528.Scaffold116.534097-534334	A0A178GTY8	DDE_3 domain-containing protein	AGTTTTGAGCAAGGTTTCCA	TCAGAAACACATTGCACTGCA	436 bp	NA*	NA*	NA*	-	-
GAGA-0538	Sericomyrmex mayri	Myrmicinae	GAGA-0538.Scaffold6.9030718-9031968	A0A0H3XL32	Potassium uptake protein KtrB	ACACCAATTAGCAATTGCATCAA	CCATAGGCTTTGTGAACAACGA	609 bp	ACGATTTGGTCCATTATGCGG	TGTCGTTTATTGTCAGTGTTGCT	751 bp	+	+
GAGA-0543	Kalathomyrmex emeryi	Myrmicinae	GAGA-0543.Scaffold14.1894874-1897946	B3CMH9	DNA helicase	TCATGATACGGGAACTGGCG	GTGACATTGCAGTGCTGGTG	979 bp	GGTCGTCATCTCCCACACAG	TACGGGCTTAGGTACTCGCT	865 bp	+	+
GAGA-0543	Kalathomyrmex emeryi	Myrmicinae	GAGA-0543.Scaffold14.3802939-3804257	A0A060Q4L5	Thioredoxin	TGCGGGATCATTTTCTTTGTTGA	TGTGACTGTGCTTGGTAGGG	762 bp	TGGCGCTTCAGTTCCTTCAT	TCAATGTGTATTCTCTTGCTTGAACT	636 bp	+	+
